# Supplementary material for: Comparative proteome analysis of Milnesium tardigradum in early embryonic state versus adults in active and anhydrobiotic state
Source: PLoS One. 2012 Sep 27;7(9):e45682. doi: 10.1371/journal.pone.0045682 (PMC3459984; doi:10.1371/journal.pone.0045682)
Supplement: Table S2 — Identified proteins of adults in active state (AS). (XLSX) [file pone.0045682.s002.xlsx]

## Sheet: Summary
	Table S2: Identified proteins of adults in active state (AS).
	In case proteins have been identified in more than one gel slice, the number of slices is listed and the sum of emPAI is calculated. The protein information belongs to the protein hit with the highest score and the number of the corresponding slice is ranked first.
	Proteins which could be identified only one time in the lane and by one peptide only are indicated in yellow. These proteins were not considered for further analysis using Blast2GO.
	Slice no.	Protein hit no.	NCBInr accession no.	Protein description	Protein score	Protein mass [Da]	Peptide matches (unique pept)	Protein coverage [%]	Protein length [aa]	Protein pI	Protein seq.	emPAI	Sum emPAI
	A7, 4-19	1	EZ762631	contig24758:1:1673:3|similar to Paramyosin (Q86RN8)|Evalue: 2e-126	2744	64906	111 (42)	62.4	556	5.47	RRAAAERTHSRFEPRETEESITAELEIMIIELDKANSAVQQLEKRVSSLEDTVKSLRNRIDEMTLELETSQRELRAAQASVTQLKSQVEKLTEQRDHLTRENKKLQDDLHEAKEALADANRRFHELEIELRRVEGERDDWRLAYQDSESARKQEEQKVIRLTAEIQQMRIEYERRLHEKEEEYEAMKKQLTIEIETLTARLADAETKLKTEVQRIKKKMQAQITELEMQLDNAQRANMEAQKDHQEAAAPXIQELQVHYEDVQRQLQQTLDQYMLIQKRVQALQAENDEMRVTAETAVRGRKAAEAMLEEVSARAQELTSLNANLLAAKSKLETECAALQQDYDEVSREWRGAEERATKAQTDLNKAMESVHEAEERAMKYDTMRKALETQVKELQVRL…	30.68	62.28
	A8, 5, 7-19	1	EZ762716	contig25094:2604:4781:3|similar to Heat shock protein HSP 90-alpha (Q76LV2)|Evalue: 0.0	2690	83855	108 (45)	62.3	725	5.01	MAQNAKNDSADVETFAFQAEIAQLMSLIINTFYSNKEIFLRELISNSSDALDKIRYMSLTDPKQLDSNKEMMIKITPDKNAKTLTLRDTGIGMTKADMINNLGTIAKSGTKAFMEALQAGADISMIGQFGVGFYSAYLVADSVTVRSKHNDDEQYLWESSAGGSFTIKVDNDSEPLGRGTEVVLHLKEDQMDYVEEKKLKEIVKKHSQFIGYPIYLVTEKERDKEVEDENETKESEETQVKKEEEEPKVEEIEDDDEDKDKSDKKKKKKTVKEKYLEDEQLNKTKPIWTRNPEEISQEEYAEFYKSLTNDWEDHLAVKHFSVEGQLEFRALLFVPRRAPFDLFENRKQKNNIKLYVRRVFIMENCEELIPDYLNFVKGVVDSEDLPLNISREMLQQNKI…	11.11	19.82
	A10, 8-20	1	EZ763042	contig26565:106:1698:1|similar to Protein disulfide-isomerase 2 (Q17770)|Evalue: 6e-144	2450	59942	138 (40)	70.4	530	4.95	MRALGVVSLVALCLLTTGVQSADYTEEENVLVLTKDNFEDALKEFPDILVEFYAPWCGHCKSLAPEYAKAATSMREVAETKNLRLAKVDATVETDLATKYGVRGYPTLKFYHDGQESEYNGPRQAEGIVNWLKKKTGFPATKLTDIDAAKAFIAGREVAVVGFFKDENSDEAKAFLDTVRAFDDIEFGYVSDDAVAKEYKTSGKNKVILFKNFDDRLVEYSGDYDKTKITSWVKENSLPLFIEFNQQTAQRVFAGDIKSHLLVFMSKAAENFQKVNESVRALATTYKNKMLMVFVNTDTEENSRITEFFGLTKDALPAVRLISLADQLVKYKPEAGDLNPETLTKFIDSYLGGKLKPHLNSQDVPEDWNAKSVKVLVGKNFDEVVMDKSKDVLVEFYAP…	18.92	36.48
	A5, 2-20	1	EZ759740	contig04531:1:1454:1|similar to Apolipophorins (Q9U943)|Evalue: 7e-11	2337	55650	168 (33)	68.6	484	6.86	KAIANLGEVTQVLQGQYNVEQKLLNCVINKNLPTNVSIAAVAALQRQEPLERTTTDRLFTVLSDQERDPLLRMVICMRTLHTVSDPTSIRNILKLIDTEKNEQVKAYMVSHIKGMMSSDVPHHKMAARVIHQVIQERGRPLPHTRARFPQSSYFELSKFFKAPVSGLKNNGEFGGQIETSFIFEEDSHIPRYWNLNVTAASFSKYVQLLEVDVDMKNVDDLIASVYNTQGRGSFAFINTLREKLKRTVKTVVRQVVRVKSARAVISKIFEVASNLEPEAMVNTVFSKIDNYNYSDFIELLSQLKKVNVGEVLNTIMKMLPQNSDIHRMGQAVRNINFDQLDTEKVIEVLTTIGFSEFKVRFVLRKMEEAGIDLDAAFKTLQNFNIEKLQQKLQNFRVQD…	73.69	148.6
	A5, 3-19	2	EZ762954	contig26128:1:2657:2|similar to Myosin-3 (P12844)|Evalue: 0.0	2180	101015	67 (36)	49.3	885	8.54	DYQQRRGENIQKEQVQQMNPPKFEKAEDMSCLTYLNDASVLHNLRQRYYKDFIYTYSGLFCVAINPFKWLPIYNKKAVACFKGRRRNEVPPHVFAISDMAYNNMLIDRENQSMLITGESGAGKTENTKKVITYFALVGASEESKKQEAAGKGTLEDQIVQANPVLEAFGNAKTVRNDNSSRFGKFIRIHFGTSGKLSGADIEEYLLEKSRVVFQQPLERSYHIFYQLMSGAIPGLLEKILLPGSITDYHLVSQGKTTVEGMDDLKEMKDTDYAFGVLGFNEEERTQVYSLVSMVMNFGEQKFKQRPREEQAEPDGTEYIERVCHLAKVSPQLLVTALTKPKVKVGTEIVTKVXNKDQCAYSVSALCKGIYKLLFSWLVMRVNQTLETKAKRQFFIGVLD…	3.77	22.39
	A9, 8-13, 15-18	1	EZ759653	contig03976:126:2186:3|similar to Chaperone protein dnaK (A6T4F4)|Evalue: 0.0	2128	75009	62 (36)	54.5	686	6.02	MLKIPQRQMLKFITQECRNSGILDEVLTVSRRFASKDTSVKGAVVGIDLGTTNSCVAIMEGKTPKVLENAEGSRTTPSVVAFTPEGERLVGMPARRQAVTNSQNTFYATKRLIGRKFEDNEVQKEAKNVSFKIVKASNGDAWVEAHGKVYSPSQIGAFVLMKMKETAEGYLGHGVKNAVITVPAYFNDSQRQATKDAGQISGLNVLRVINEPTAAALAFGMDKANDQIIAVYDLGGGTFDISVLEIQKGVFEVKSTNGDTFLGGEDFDTALLQYLIKEFKRDQGIDITKDNMAMQRLREAAEKAKIELSSALQTDINLPYLTMDASGPKHLNIKLTRSKFESIVENLIKRTVEPCQKAIKDAEVGLNDIGEVILVGGMTRVPKVQQTVQDIFKKNPSKS…	6.48	8.48
	A11, 8-21	1	EZ759701	contig04301:1:1559:3|similar to ATP synthase subunit beta (Q39Q56)|Evalue: 0.0	1992	56051	120 (26)	75.1	518	5.38	QQLNFLVAAQQRFQSGQPAQQNRGQQQPNRGQQNQQMQRGPSSQAALGSGGKVVAVIGAVVDVHFDGELPPILNALEVENRQPRLVLEIAQHLGENTVRTIAMDGTEGLIRGQKVVDTGFPIRIPVGPETLGRIMNVIGEPIDERGPIQTKKFAAIHAEAPEFVEMSVQAEILVTGIKVVDLLAPYAKGGKIGLFGGAGVGKTVLIMELINNVAKAHGGYSVFAGVGERTREGNDLYHEMIEGGVISLKDNTSKVALVYGQMNEPPGARARVALTGLTVAEYFRDQEGQDVLLFIDNIFRFTQAGSEVSALLGRIPSAVGYQPTLATDMGQMQERITTTKKGSITSVQAIYVPADDLTDPAPATTFAHLDATTVLSRGIAELGIYPAVDPLDSTSRIMD…	19.58	34.93
	A10, 9-19	2	EZ760182	contig07413:1:1541:1|similar to 60 kDa heat shock protein, mitochondrial (P63038)|Evalue: 0.0	1985	55565	77 (32)	66.1	513	5.88	GTMYTQRLLSRQIRSLVPVLQRTYAKDLRFGRDARYSMLRGVDLLADAVAVTMGPKGRNVIIEQSWGSPKITKDGVTVAKAIELKDKYENIGAKLVQDVASSTNDQAGDGTTAATILARAIAKEGFDKIVSGANPIEIRRGVIMAVEAVVESLKRMSRKVTTPDEIAQVATISANGDTAIGELISRAMEKVGKDGVITVKDGKTLQDELEVIKGMKFDRGFISPYFINTAKGAKTEFQDAYVLFSEKKISSIAQVVPALELAHTARKPLVIIAEDVDGEALTTLVLNRLKAGLQVVAVKAPGFGDNRKNSLRDMAIATGGTLFGDDADLYKLEDIKLDDFGRVGEVTVTKDDTLLLKGKGEKRDVEERITSIRDELEATTSEYEKEKLNERLAKLASGV…	10.19	13.95
	A7, 7-16	3	EZ760796	contig13124:1:1993:2|similar to Alpha-actinin-2 (Q3ZC55)|Evalue: 0.0	1826	77104	44 (35)	64.9	663	6.19	MVEMVKPDERAVMTYVSCFYHAFQGQNQAESAAQRISRALRGRQGNEDLEGEYDRLASDLLDWIKHTKPWLENRTTDNTLPGVRKKLDEYRGYRTQQKPPRVEQKGKLETAFNTLQTKLRLSNRPAYIPKEGRMVSDIAGAWKGLDNAERGFEEWLLSELMRLERLDHLAQKFKRKADIHEEWSKGKXELLSRNDYRNASLAEVKALKRKQEAFESDLAAHQERVEQMAAIAQELNTLGYHDSPNINSRCQRICTQWDRLGSLTTQRHHGIDEAEKILERVDTLHLDFAKRSAPFNNWLDGAREDLVDMFIVHTVDEVQTLLNAHQQFKATLGDADKEFNSILTLYSEVQRMAQQHNIPGALENPYSNITPQDITNKWNEVKQLVPRRDQSLQQEQLRQ…	4.07	6.42
	A12, 11-13, 15-17	1	EZ762884	contig25802:1:1389:1|similar to Enolase (Q27527)|Evalue: 0.0	1786	50818	62 (24)	68.8	462	6.25	GGHWFVLQLHLHSPVFTVAFAQSNTAKMSIKKIVARQIFDSRGNPTVEVDLTTDKGVFRAAVPSGASTGIYEAVELRDDDKKMYLGKGVSKAINNINSELASQVIAQNFKVTQQKEIDQFMIKLDGTPNKGRLGANAILGISMAVCKAAAAEEGLPLYRYIAKLNGTKEIILPVPSFNVINGGSHAGNRLAMQEFMVMPTGASNFAEAMKMGSEIYHNLKKIIQDRYGKSAVAVGDEGGFAPDITEGKDALQVIKEAIEKSGYTGKVQIAMDTAASEYYKGDQKQYDLDFKNKDSDKSKWLQSDALAEVYKGYYKDFDCISHEDPFDQDDWDAWVKLTGSANIQIVGDDLTVTNPERIKTAVEKKACNCLLLKVNQIGSVTESIDAAQLARSSGWGIMV…	8.6	10.05
	A11, 8-22, 26	2	EZ762269	contig23461:107:1792:2|similar to ATP synthase subunit alpha (A0LDA2)|Evalue: 0.0	1774	60617	76 (29)	51.5	561	9.23	MAVPSARVATTLAKHVASNAAKMSRRQVAASMVAVRNLCSTPALHASNKTQAAETTSILEERILGAIPQMNLEETGRVLSIGDGIARVYGLKNIQAEEMVEFSSGLKGMALNLESDNVGVVVFGNDKLIKEGDIVKRTGAIVDVPVGDQLLGRVVDALGTPIDGKGPVAGAKRARVGIKAPGIIPRASVREPMQTGIKAVDSLVPIGRGQRELIIGDRQTGKTAIAIDAIINQKRFNDAADESKKLYCIYVAIGQKRSTVAQLVKRLHDADALKYTVIVSATASDAAPLQYLAPYSGCAMGEFFRDNGKHALIIYDDLSKQAVAYRQMSLLLRRPPGREAYPGDVFYLHSRLLERAAKLNKSIGGGSLTALPVIETQAGDVSAYIPTNVISITDGQIFL…	6.45	16.86
	A10, 8-19	4	EZ761272	contig18362:1:1784:3|similar to Glutamate dehydrogenase 1, mitochondrial (P00367)|Evalue: 0.0	1738	65433	70 (28)	58.5	593	8.62	ILGFSLFKLHSTHNSATMLASAASALKVAAATTVQSAAIKAPATLTSQLVIAKRRQHHGVTQEMTGLSHESVSKLSSMNIVAPATHRDVSYVEDAQDPSFSDMVEYFFNRGAKIIEDHLVQNLKGRLAPDEKRKRVKGILKVIKPVDSVLSLTFPLRRDNGDYEVIEAYRSQHSHHRTPCKGGIRYSMDVNIDEVMALSALMTYKCAVVDVPFGGAKAGIKIDPKKYSDNELEKITRRFALELAKKGFIGPGVDVPAPDMGTGEREMAWISDTYATTVGHLDINSHACVTGKPISQGGIHGRVSATGRGVFHGLHNFINEANFMGMIGMTPGFQDKTFIVQGFGNVGLHTTRYLHRAGAKCIGISEIDGAIYNPNGMDPRELEDYKLANGTLMGFPNSQ…	7.24	17.19
	A5, 3-9	3	EZ759139	contig01298:1:2065:3|similar to Catalase HPII (P21179)|Evalue: 0.0	1706	76798	67 (29)	55	687	5.98	AGSAMADLVMSDAKSQDLQKVTIEDPQKGNYITSTFGLRINHTDDSLKAGPRGPTLLEDFWFRERTTHFDHERIPERVVHARGSGAHGYFQLYESLEQYTKASFLCNTSKKTPVFTRFSTVLGSRGSADTARDVRGFAVKFYTDEGNFDLVGNNIPVFFVQDAIKFQDIIHAGKPEPDNEIPQASTAHDNLWDFMSLLPETTHMMMWATSDRFIPRSYRMMEGFGVHSFILSNKDGKRVFAKFHWKPLLGVHSLVWDEAHKLMGIDPDFHRRDLWEAIEAGAYPEYELGLQIVAEEDEHKFPFDLLDSTKIIPEELVPVMRVGKLVLNRNPDNFFAETEQVAYHMGHLVPGIEASNDPLLQGRLFSYVDTQLTRLGGPNFNQIPINRPIVEVTNHMRDG…	5.3	13.23
	A6, 3-20	3	EZ760037	contig06373:1:1480:1|similar to Vitellogenin-4 (P18947)|Evalue: 9e-11	1689	56002	126 (24)	67.5	493	6.01	GRDIDTQFAGLPIPDVEVWEIPTNNFTKAAVYNFTAGHESLGVKVNVDALSTYPIGTPYKAIFPIGHKGYLRILTKPTGQSKSLTVSMYEKREVVKTSEKELINKLKDKMPNLELKDTQAKLSPPSNYETAKKYGYSLQFFVQPSSTPSHQQQARETQPGQVPTDYQMRLFLGIVYSWDMLYAKSFAMLENKLPAGPKVACFTGEMRAPDRTGLWYLTPQTPALKPIEGLAEINYGQQCTENKIRIHLKAEQSGEQLNLNKQDLYDEFGTPLAYTVAHEAHEAEGLFQSLYKKCEEDRQIGAYFTEACVDFVKTYTDYLVYKINVEYTHISRPTLKLLQKAEQIALHMYYYNTYIDEVDVYPEHPTSQSASANQPRKFNATIAFGPGRRYVNVYYNTTT…	14.47	60.6
	A9, 8-18	6	EZ760247	contig07915:1:1267:2|similar to Heat shock cognate 71 kDa protein (Q90473)|Evalue: 0.0	1653	46522	79 (26)	64.2	422	6.07	GTTYSCVGVFQHGKVEIIANDQGNRTTPSYVGFTDTERLVGDAAKNQVAMNPEHTVFDAKRLIGRRFEDATVQGDMKHWPFKVVSDGGKPKIQVEYKGETKQFFPEEISAMVLQKMKETAEAYLGKTVTQAVVTVPAXFNDSQRQATKDAGTISGMNILRIINEPTAAAIAYGLDKKVGGERNVLIFDLGGGTFDVSILTIEEGIFEVKSTAGDTHLGGEDFDNRMVTHFIQEFQRKHKKNISDNPRAVRRLRTACERAKRTLSSSTQASIEIDSLYEGVDFYSNITRARFEELCADLFRGTLDPVEKSLRDAKMDKNQIHDIVLVGGSTRIPKVQKLLQDFFNGKELNKSINPDEAVAYGAAVQAAILSGDKSEAVQDLLLLDVTPLSLGIETAGGVM…	22.41	32.48
	A9, 7-9, 11-19, 24, 26, 27	7	EZ759480	contig03109:97:1837:1|similar to Lamin Dm0 (P08928)|Evalue: 4e-60	1631	66260	50 (31)	56.6	580	5.33	MVAPSKAKRATTTSQSTSQQSSHSSMSSSSGLATSAVARDPNVTTTIFERHETETRERRTHTPRPTSPEISSASVSHINSPLTRSQEKEELQYLNTRLASYIDKIRSQEDEIGTLRRRIETVETSETSEVRKVKDTYDRELANLRSAVDEFSREKAALTIERDSLKSKNQELSAKVTSLENDKANLQRKLRDADLMLDDLKNKLAKAKDQLRALEQDAENLRRENDDMTRQLETLRQEVANETLKRVDXGEPTVDAQEDMAFKKAVFDQEIHNLRVGRTAVITETETRVRDEYESRIADHLAELRREFEEMATSAREELETNYLARIADLQTLADRHKDTAADVYKELQKYQQRVNESQQKMDRLSAENRSLQSRLDDALRNKDDEIQKLQQLLADRQE…	4.18	5.88
	A8, 8-12, 14	5	EZ762354	contig23758:1:2385:1|similar to Aconitate hydratase, mitochondrial (P20004)|Evalue: 0.0	1609	86924	47 (28)	50.1	794	8.09	LLSSSNALKTALQQMQMRQFCLSSLSAAQAKLNPQMSRLEPNRTIDYDKLVHNVEIVKKRLGHPLTLAEKILYSHLDKPEKQEITRGKSYLMLRPDRVAMQDATAQMAVMQFISSGIQSVAVPSTIHCDHLIEASEGGPQDLERAFXVNGEVYNFLASAGAKYDIGFWKPGSGIIHQIILENYAFPGLLLIGTDSHTPNGGGLGGLCIGVGGADAVDVMAGLPWELKCPKVIGVKLTGELSGWTSPKDVILKVAGILTVKGGTGAIVEYFGPGVDSISCTGMATICNMGAEIGATTSVFPYNYRMEKYLQATNRGDIASAANSIKKQLLFPDEGAKYDSVIEIDLNKLKPHVNGPYTPDLATPIDELGAVAKKNNWPMDIKVGLIGSCTNSSYEDMERS…	2.65	3.39
	A7, 4-19	5	EZ760660	contig11548:1:1628:3|similar to Elongation factor 2 (P09445)|Evalue: 0.0	1594	61258	58 (28)	64.8	542	6.45	SSVEAVELXACLRVPCVELAEVTLDSSVFRNRIQRNXPEFHYSETSLLHSLTSTNATTKMVNFTIDEVRRMMDKKTNIRNMSVIAHVDHGKSTLTDSLVTKAGIIAQAKAGEMRFTDTRKDEQERCITIKSTAISMYFEMREIDLPLIKGESQLEAGHRGFLINLIDSPGHVDFSSEVTAALRVTDGALVVVDAVSGVCVQTETVLRQAIAERIKPILMMNKMDRALLELQLDQEDLFQTFSRIVENINVIIATYGDPEGGVMGDIKVDPAKGNCGFGSGLHGWAFTLKQFAEMYAAKFQIDVEKLMGRLWGENFYNPKTRKWAKTKVDADHVRSFNMFVLDPIYKVFDAIMKFKHDETAKLLEKLNVVLKGEDKEKDGKNLLRVVMREWIPAGETLFQ…	5.92	14
	A14, 12-23	1	EZ761641	contig20019:1:1092:1|similar to Arginine kinase (Q95V58)|Evalue: 1e-145	1592	41570	85 (26)	73.3	363	6.6	RLEQWVQQMLDKKLDEGYKTLQADPKCHSLLRKYMTPEIIQKLKDTKTKMGASLWDCVQSGVANIDSGVGIYAPDAESYTTFKDLFYPIINDYHVGFDIEKGAKHPKSDFGMDKLNFPNPDPEGKYIISTRVRCGRSLQGFPFNPLLNEQQYKEMEDKVKNALAAMPDELSGTYYPLTGMTKDIQNKLIDDHFLFKEGDRFLQAAQAVRFWPTGRGIFHNDAKTFLVWVNEEDHLRIISMQKGGDLMAVYKRLIKGVNAIEKMLPFSHDDTLGYLTFCPTNLGTTIRASVHIKLPKISQNLEEFHKIAAKYNLQVRGTSGEHTESVGGVYDVSNKRRMGLTEYEAVKEMYDGIVELIKLESQS	25.74	37.1
	A12, 11-14, 16, 17	2	EZ762908	contig25921:1:1436:3|similar to Tubulin beta-1 chain (O17449)|Evalue: 0.0	1577	54166	65 (21)	56.6	477	4.92	YLVDIFLTFHFSTLVSVTCNPFYSRNXEQKMREIVHLQAGQCGNQIGAKFWEVISDEHGIDPTGKYVGDSDLQLERINVYYTEASGGRYVPRAVLVDLEPGTMDSVRSSPFGRLFRPDNFVFGQSGAGNNWAKGHYTEGAELVDNVMDVVRKEAEACDCLQGFQLAHSLGGGTGSGMGTLLISKIREEYPDRIMTSFSVVPSPKVSDTVVEPYNATLSVHQLVENTDETFCIDNEALYDICFRTLKLTTPTYGDLNHLVSVTMSGVTTCLRFPGQLNADLRKLAVNMVPFPRLHFFMPGFAPLTAHSSHQYRNLTVAELTQQMFDAKNMMAACDPRHGRYLTVAAIFRGRMSMKEVDEQMLSIQNKNSSYFVEWIPNNVKVAVCDIPPRGLKMAATFIG…	6.44	11.18
	A9, 9-15	9	EZ762011	contig22339:27:1898:3|similar to V-type proton ATPase catalytic subunit A (Q90647)|Evalue: 0.0	1543	69912	40 (28)	55.5	623	5.13	MAREYNKENQLPRVGDEEKESEYGYVFGVSGPVVIAEKMAGSAMYELVRVGHEELVGEIIRLEGDMATIQVYEETSGVTVGDPVLRTGKPLSVELGPGIMGSIFDGIQRPLEDINKYTESIYIPKGVNVPALSRSAKWDFDPIQSMRVGSHLTGGDIYGNVHENVFVEHKVMLPPRAKGKITYIAPHGQYTIDDVVLETEFDGEKSKFTLCQVWPVRTMRPVVEKLAANYPLLTGQRVLDALFPCVLGGTTAIPGAFGCGKTVISQSLSKYSNSEVIVYVGCGERGNEMSEVLRDFPELTAEINGKTESIMKRTALVANTSNMPVAAREASIYTGITLSEYFRDMGYNVSMMADSTSRWAEALREISGRLAEMPADSGYPAYLGARLASFYERAGRVKC…	3.55	4.05
	A9, 8-14	10	EZ760288	contig08238:193:2135:1|similar to Putative ATP-dependent RNA helicase an3 (P24346)|Evalue: 2e-170	1536	71132	45 (27)	52.2	647	7.1	MDKVQATYASQQTPATKYVPPHLRSFGGQSAVGSGVASTGVYAAGGQFDTSAYGGEPSAAGMVFYGQLPQTQSTLMAAQQQQQQQYYQQQAYAQPQQSYGRPQQSYYDQAQRNTGGYGGADRWSSAAPTYTRQSSYGNNYGTRDSNTGGGYAGHQGTRWKSYSGDQSNVTPEDWGTPGPRDETAEKTLFQNVSTGINFDKYEDIEVEVSGRDVPKPINAFKDCELADIVKNNVQMAQYDKPTPVQKQAIPIVLEKRDLMACAQTGSGKTAAFLVPIISRLLSDGPPNVPQSGYRRRIQYPLAVILAPTRELAIQIFEEALRFSYRSRVLRACVVYGGADIGTQIRDLDKGCHLIVATPGRLKDLLERGRVALDLVRFLVLDEADRMLDMGFEPQIRVIV…	2.87	5.13
	A14, 9, 11-22	2	EZ763318	contig28264:1:1252:2|similar to Glyceraldehyde-3-phosphate dehydrogenase (P17244)|Evalue: 8e-134	1520	46596	96 (23)	62.5	416	7.71	LSLQRTRAHQISFSITADDSLPTYFSLYSSFFRRSSLRKTRDNMAKIGINGFGRIGRLVLRAAIDKDVDVVAINDPFIDIKYMVYMFKHDSTHGKYKADVKEQDGQLSINGKLIKVFNEMKPENIPWGTAGAVYVVESTGVFTTTDKCKAHLQGGAKKVIISAPSADAPMFVCGVNLDKYDAKTMDIVSNASCTTNCLAPLAKVINDKFGIVEGLMTTVHAFTATQKVVDAPSQKLWRDGRGAFQNIIPASTGAAKAVGKVIPELNNKLTGMAFRVPVPDVSVVDLTVRLEKEASYDDIKKVMKEASETDNWKEIICYTEEECVSSDFISSRYSSIFDANAGIALNKNFVKLIAWYDNEYGYSHRVIDLITFMHTKAXSDVSIGEHCWLSTGQLKEWTD…	14.42	23.08
	A9, 8-19	11	EZ762958	contig26153:1:1449:2|similar to 78 kDa glucose-regulated protein (Q24798)|Evalue: 0.0	1512	53380	67 (24)	49.4	482	6.01	MRWCVQEWTCRDYANDQGNRITPSYVAFTADGERLVGDAAKNQLTSNPXNTVFDVKRLVGREWSDTSVXHDIKFYPFKVINKNSKPHIQAEVNGQAKTFAPEEISAMILTKMKEVAEAYLGKKGHXHAVVTVPAYFNDAQRQATKDAGVIAGLTVMRIINEPTAAAIAYGLDKKEGEKNILVFDLGGGTFDVSLLTIDNGVFEVIATNGDTHLGGEDFDQRVMDHFIKLFKKKHGKDMRKDHRAVQKLRREVEKAKRALSSQHQTRIEIEAIFDGIDFSETLTRAKFEELNMDLFRSTLKPVQKVLEDADLKKTDIHEIVLVGGSTRIXKVQQLVKEFFDGKEPSRGINPDEAVAYGAAVQAGVLGGEETINDMVLLDVNPLTLGIETVGGVMTKLIPR…	7.63	12.97
	A12, 11-20, 22	3	EZ758921	contig00124:1:1376:3|similar to Eukaryotic initiation factor 4A-II (Q8JFP1)|Evalue: 2e-166	1504	52397	64 (22)	64.3	457	5.75	QTSKTWLRTTFLRKKFFSVTQTLPSHYXENMSTGQPKNDGANEMESGSNVVRVDDNLIVSNYDEAVDSFDEMNLKEPLLRGVFAYGFEKPSAIQQRAILPCIRGRDVIAQAQSGTGKTATFAISILQNINVEMPECQAMVLAPTRELAQQIQKVILALGDYMGVLCHACIGGTNVQNDIVKLSNGQHVVVGTPGRVHDMIQRRALRVNELKMFVLDEADEMLSRGFKDQIYDVFKNCPENVQVVLLSATMPPDVLDVTTKFMREPARILVKKEELTLEGIQQFFVNVEKEEWKLDTLVDVYQTLSIAQSIIFCNTRRKVDFLTKQMMSRDFVVSSMHADMDQQERETIMREFRTGSSRVLITTDLLARGIDVQQVSLVINYDLPHNRENYIHRIGRGGR…	8.55	11.24
	A12, 11-14, 18, 19	4	EZ761845	contig21183:1:1353:1|similar to Rab GDP dissociation inhibitor beta (P50395)|Evalue: 4e-165	1465	50742	44 (25)	71.1	450	6.26	HSPFRHKXRMDEKYDAIVCGTGLTECIISGMLSVSGKRVLHVDRNKYYGGESASITPLEELFAKFNAGSLPTEMGRGRDWNVDLVPKLLLANGELVKLLIHTGVTRYLEFKSIEGSYVYKGGKIHKVPADEKEALGSNLMGLFEKRRFRNFLVYVMEFDPNDPKTWKDIDPRTATMNQVYEKFGLDKNTADFTGHALALYPNDDYVNGPCGPTLEKIKLYQESLARYGKSPYLYPLYGLGELPQGFARLSAIYGGTYMLDKSVDEIVMENGRAVGVRCGNEVAKCSQVYCDPSYAPNRVKKVGEVIRCICLLDHPIPNTKDALSTQIIIPQNQVNRNNDIYISVVSYTHQVAAKGWFIAMVSTTVETQSPESEIKVALELLGPIRQKFVSVTDLLVPTD…	6.04	6.64
	A7, 5-10	7	EZ762049	contig22552:1:2159:2|similar to Peroxidasin (A4IGL7)|Evalue: 7e-54	1462	84539	47 (24)	55.8	719	5.64	TVARKAYYQGNYQCVLGGYPSGIGNYFLKWFTTKDSTTDDVRYAETLVFVAEWLWNNYYGNKEDLFMVFKNVNADTEPYLKECYDKRYRKWKCDINQKYRSIDGSCNNIAYPSWGATGEQEIRITKRWMYEDRISAPVQSWWVPGPDGQRYPMAGCREVNNALNSQYSDCNVWDHNSLAVSFGQFLSHDMVSTPMYRVPDVYSGTNVVPGCCNTQPNCRHYSCIPIPVPANDPHYSRWYKDCLEMVRAVPAEDYCRPGPWDPVNQQTSYVDLSHVYGATCEVNNKIRAYRKGKLRINKGYYGLYSQNILLPYNDGPENLGICLKTQRSDSNMGCFLGGDPRTNQNPALTALQTLYMRMHNRLANSCSKHMERYYLTEDVLDEICFQETRRVMIAIQQIV…	2.51	3.79
	A12, 10-12, 15, 16, 18, 19	5	EZ762682	contig24968:1:1457:3|similar to Tubulin beta-1 chain (O17449)|Evalue: 0.0	1424	55045	64 (20)	53.5	484	4.89	CLIDAASLQQTCILNLYFLRFFSNFRHFFVTKTQQEXXERIVHLQAGQCGNQIGSKFWEVISDEHGIDPTGKYIGDSELQLERVNVYYNEASGGKYVPRAVLVDLEPGTMDSVRSSPFGQLFRPDNFVFGQSGAGNNWAKGHYTEGAELVDSVMDVVRKEAENCDCLQGFQLAHSLGGGTGSGMGTLLISKIREEYPDRIMTTFSVVPSPKVSDTVVEPYNATLSVHQLVENTDETFCIDNEALYDICFRTLKLTTPTYGDLNHLVSVTMSGVTTCLRFPGQLNADLRKLAVNMVPFPRLHFFMPGFAPLTARGSQSYRNLSVPELTQQMFDAKNMMAACDPRHGRYLTVAAIFRGRMSMKEVDEQMLSIQNKNSSYFVEWIPNNVKVAVCDIPPRGLK…	5.8	9.09
	A9, 4, 5, 7-15	12	EZ762948	contig26103:184:2216:1|similar to Long-chain-fatty-acid--CoA ligase 5 (Q8JZR0)|Evalue: 3e-166	1422	75561	51 (23)	45.1	677	6.47	MIGLLITVLFTIICALLLPLVLIFAIDFLTKPDPKRVQNYDYSSQTEEDSNGVRRRKFVGKEEEIKIDIPKTLYENFQHGISISGERPCLGYRPEPTAPYTWISYNDMNKRIKNFGSGMIEKGIPAQNDTFIGIQAANSVQWVTTEQACNAYSMVIVPLYDTLGVEACNHVINLIKIGTVVVDTEDRLLRFLENAEKTKPLKRIITVAKPSEEVIQKAASVGIELCLFSDIEELGSEKPHDVVPPKPTDLATICCTSGTTGDPKGVMLTHENFMADTEGLISGILPHKLAAADSVISYLPLAHLYERLVQVMMFLHGARVGFFGGDVRRLTDDMKELKPTLVPAVPRVLSRVYSGAMTQAAKSIITKIILKTAVKMKLLELKCGIMRRDSILDKLIFKK…	3.24	4.19
	A8, 5, 7	8	EZ762306	contig23593:1:2727:1|similar to 26S proteasome regulatory subunit rpn1 (P87048)|Evalue: 0.0	1392	101386	28 (25)	38.9	908	5.67	FFQKTGVTQQNGSERHGXKVQKLTQNRREKKKDKSEDELSEEDQKLQAELNLLVERLQENRPELYKLALETLRSLIRSSTTSMTSVPKPLKFLRPHFGTIKEVYEKITDREIKRMCASIISVMAMTMSSTRESLKFKLLGSEEEIGSWGHEYVRHLAGELTQEWNEVAELEAPQHKVLLSLAKEIVVFFMHHNAEPEACDLLMEIEQLELLQQYVDEHAYGKVCLYLVSCVPYVADPEDTNLMTTAAAIYRKFGQYTEAVRLAIRLLDMDLIKDIFSSCPDRSIQKQLAFILAHSQVYLDLDESMDGYDEFLEIMSNSHLNQNHLTLARELDIAEPKTPDDVYKTHLEQHRSLYSGAGLDSARANLASAFVNGLVNCAFGSDKMFAEDGNKWIYKNKEH…	1.21	1.61
	A9, 8-12, 16	13	EZ760448	contig09502:237:2105:3|similar to Heat shock cognate 71 kDa protein (Q90473)|Evalue: 0.0	1374	68965	38 (19)	38.1	622	5.41	MDXEKEEKNYGTVIGIDLGTTYSCVGVYRNGQVEIISNDQGNRITPSYVAFTADGERLVGDAAKNQLTSNPENTVFDVKRLIGREWDDGSVQRDIKFYPFKVVNKGSKPVIQVQVGSKDLKTFTPEEISAMILSKMKEVAEQFLGKKVTHAVVTVPAYFNDAQRSATKDAGTIAGLNVLRIINEPTAAAIAYGLDKKKEAENILVFDLGGGTFDVSLLTIDNGVFEVVSTNGDTHLGGEDFDQNVMDYFVKLIEKKYAKDLRNDTRGLQKLRREVEKAKRVLSNEHQTRVEVESLIDGVDFGETLTRAKFEELNMDLFKSTLKPVEKALTDGAMKKSEIQEIILVGGSTRIPKIQELVKTFFDGKEPSRGVNPDEAVAYGAAVHAGALSGEQFEGHILV…	2.51	3.64
	A5, 2-19	4	EZ761306	contig18537:1:1312:2|PREDICTED: similar to apolipoprotein B [Strongylocentrotus purpuratus] (XP_800206.2)|Evalue: 1e-07	1373	49479	99 (21)	51.5	437	5.84	PITQRSTRRSHSRSTTDSTNEYDNDSRTPQSKHMRGIDRRQSSGNKGRSSYATDDSDDVELVACIKMLGYELGFLSIHDFKQLPIFSVRDMIRYFKDVVDGFEKQPTIAFKLEAAHPTVTALGIPLTYSLNFTTIASLHVKLNVENNEGVHGSSKIDMKVEPSGVAQLAGGIIVDIPSIHTISVISNTTVKSEFEYRMKLAKSKDTLEIEIEKPDEQLDLLYFNNEMKLSKDEDDFEIFEKQTVRSMETEKCLPSIVEKVTGIKACAELAYSALRGSVMPSGGPYKARFYIESSESEGLKHYRVNARHSTYHQEPIVDSRNRPQHSRSEAHKFDMDFEAPGHRSQRSVKSSFTYNPQRNTASLDMQAPDMSTPRLKFFVHNVTDEDNIFGFESGWDLEY…	17.2	65.75
	A12, 10-14, 16	7	EZ761296	contig18504:154:1359:1|similar to Calreticulin (Q4R6K8)|Evalue: 4e-127	1370	46442	63 (24)	73.6	401	4.66	MLGLSVVVTALLLVSTYADVYFKEQFLDNKWEDRWVQSEHSGKEWGKFVWTAGKFYGDADLNKGIQTSQDARFYGLSAAFPKFTNKDKPLVIQFSVKHEQNIDCGGGYVKVFPSTMDQKDMHGESPYHVMFGPDICGPGTKKVHVILTYKGKNYLTKKNIRCKDDEYTHVYTLILNPDNSYVVKIDNKEEEKGTIEEDWDILPSKTIKDPNAKKPSQDEWDERETIPDVEDKKPEDWDKPQHIADPEAKKPEDWDDEMDGTWEPAQIENPDYKGEWKAREIPNPAYKGTWVHPEVPNPEYSSEPTLYKFDDLGVIGFDLWQVKSGTIFDDIIITDDIKAAEDFANDTWGKTHEAEKKMKEKLDDEEKKKSETDTKKDEEFNAELPKTDDDDHDHDADHD…	12.61	19.56
	A7, 7-10	8	EZ762316	contig23622:1:2311:2|similar to Glycogen phosphorylase (Q9PKE6)|Evalue: 0.0	1342	88376	45 (28)	51.2	769	6.18	YQLGLDIEELQELEEDAGLGNGGLGRLVACFLDFYXXTLGLASYGYGIRYEYGIFDQKIKNGEQHEQPDNWLQFGNPWEKARPEYMIAINFYGNVIRDDKGFKWVNTQTVYAMPYDMPVPGYGNNCVNTLRLWSARSPNHFSLEFFNDGDYIQAVLDRNLAENISHVLYPNDNIFEGKELRLKQEYFMVAASLQDIIRRFKSAKFGCRDPVRTSFDVFADKVAVQLNDTHPSLAIPELMRILMDNEGLSWAKAFEITTKTCAYTNHTVLPEALERWPVSLLGRLLPRHLQILYEMNHLFLQSVSEKFPGDHDRIRRMSCVEEEGEKRINMAFVSIVGSHAVNGVAALHSELLKKTVFRDFYEMWPEKFQNKTNGITPRRWLLLCNSSLADVVSDKIGQE…	2.85	3.35
	A7, 4-19	9	EZ759645	contig03955:1:1081:2|similar to Elongation factor 2 (P09445)|Evalue: 0.0	1330	40216	50 (21)	71.3	359	5.79	SVSPVVRVAVEPKNPADLPKLVEGLKRLAKSDPMVQCIIEESGEHIIAGAGELHLEICLKDLEEDHACIPIKTSDPVVSYRETVCEESTELCLSKSPNKHNRLYMKAVPMPDGLADDIDRGEITAKQDFKARGRIMADKYGYDVGEARKIWCFGPDTSGANILVDVTKGVQYLNEIKDSCVAGFQWATKEGVLCEENCRGIRFNLHDVTLHADAIHRGGGQIIPTARRVLYAAMITAGPRLLEPVYLVEIQCPEQAVGGIYGVLNRRRGHVFEESQTPGTPMFVVKAYLPVNESFGFTADLRSNTGGQAFPQCVFDHWQILPGDPFDPKTKPAEVVMVTRKRKGLKEGVPALDNFMDKL	9.73	20.1
	A6, 3-26	4	EZ760059	contig06595:1:952:2|similar to Vitellogenin-1 (P87498)|Evalue: 3e-07	1321	35963	128 (20)	76.3	317	9.92	VPRAAKLRVRTNIDERSVELLEFGYETEGFGQNIRNYIGNLTREALSAVTGGRRSSHSRNTRQTSQPTQINMADINSKLKIKPIVPKEMRGSAYLKIFGEETRFAVVNPDTVGRFLVELFGQSQQALTKLTGEGYKIENRRALYPQFELQMPTVFGVPVYMWNRFPLVASMKGKVKVQMEPKPQNIDFSLLQHMPETVKIDTDFTTTLDGQHVYSLGVYAGFIKVATGITTKVSIEVPVKGSLLFRPAENLTKFTWDIPEKPTELLKIQKFPTTIVRKYTNKPPSFKPQSDRADRAPLKHNTRCLLSTLNLRMTSTT	30.12	107.89
	A8, 8-10, 12, 14, 17, 18	9	EZ760523	contig10192:37:2259:1|similar to Dipeptidyl-peptidase 3 (O55096)|Evalue: 7e-180	1317	215709	27 (22)	35	740	5.36	MAALNLTRKTREKYYVSRLSRVPTLECRTAFELLKPDEQKYVHYWSKASWIGGLITCVQTSPESPLLFILLQNLFGAEEVKSLESTALKECGLTQEEWDAVKFFAAGFYHNMGNYLGFGDTKIVPEIPKEKFETLIKASAAYKAKGKMIDDLWGRVSTVLYELDNERLRQLGLAPDGVTTYFSWNCNERDSRLVKDFQVEQNIDPYNARVFKSVVKNSADDAATYEIRMASANQKPDGSVKAGKLTLDGKPVQFKNANFIVTGGDYAPLMGKMNEYLKKAVDFASNENEKKMHLEYIKSFETGSMDAHKEGSRYWIKDRRPPVEGYIGFIETYRDPAGQRGEFEGFVAIVDQEKSNRLNKLVDAAETIIAKLPWPKQYEKDKYLRPDFSELTVVTFASS…	0.41	0.59
	A10, 9, 12-14, 17	6	EZ762204	contig23241:1:1690:2|No distinct annotation|Best-hit: Four and a half LIM domains protein 2 (Q14192)|Evalue: 1e-88	1310	66165	46 (27)	52.8	562	7.23	EIRIQLIITDYQASKMTADAAVVDIGQPCINCGDKCPGYEPQGFKKSCDHCHCARIEHEIYVQGSLAAQDRVPSVQLPDPMRMVSGPKSNYVPSKYIWAPVGLPREKIEEYFKSIPEDKRPTKNSPGEVFWHQQLIQQFPPQDFDLSQTQFVDETHQKSYDEFIKTRNEHCLDRGYVRDSIPETSTCRQCKGVIQKGSVVVVAPKIGENAYYHPGCFQCSTCNEGLIELVYCVGPPTDENAGTKIFCPRHFAEQVKPRCAACDELIFAGEYTRAMNRDWHATHFACTHCMHPLTGKRYVLREQQPVCLKCYEDHFANTCTDCQRPIGIEGRDLAYKDRHWHEACFLCALCKMSLVDKAFGTKEDKIYCGNCYDNSFGQKCDGCGEIFRAGTKKLEYKGR…	3.28	3.98
	A8, 6-9	10	EZ762725	contig25127:343:2520:1|seems to belong to extended synaptotagmin family|Best-hit: Extended synaptotagmin-2 (A0FGR8)|Evalue: 5e-102	1307	81938	28 (23)	39	725	5.46	MICEKAYEQLTNNDQKFIKDRMQDLPSWVFFPDQERAEWFNRMLYQMWPFMNKYLQELIISIMEPAVNGALPKPLKFWFESITMGDEAPRVGGMKVYKDQISRGEIIIDAEILYAGDAEVKARVSKLLIGFNQIRLHGTXAIIFKPLVNKMPFIGGITVFFLSTPALDFNLTNLADVMDIPGLSELMRKVVQDQVNYFTVLPNKISIPLVDDISNYSLKFDPPDGVLRIFIAEAQDLKAADVNLIGRNKSDPYCVVKLGAQIHTTKVIESNLNPNWSEYYEGVVDHASGQTVEVEIFDKDKGNDDDFLGRLTLDIMPIARQGTVDKWFRLEDGEGNIRLRFFWMGLNPDPNYVQTAKREAATLSEKANLASALLMLYIDSAANLPNMKKIASEPSPYCI…	1.67	1.91
	A11, 10-18	4	EZ761917	contig21701:200:1894:2|similar to Protein disulfide-isomerase A3 (P38657)|Evalue: 1e-134	1302	63808	44 (21)	45	564	6.63	MLRSVAVVSLLCVGLVWSTSSDVLDLTDANFESTVTKYPLILVEFFAPWCGHCKRLAPEYEKAATALAKEDPPVPIAKVDCTANTETCQKHGVSGYPTLKIFRNGEISKDYAGPREADGIVRYMRTESGPSSRELKSSEEWQKFVNHEDASIVGYFADGMTALRDKFVKIADTLKEELRFGHTHDKSLFSDGKYENKVVIHRPKRLQNKFEEDYAVCSADEESSLKECLKSGIHGLVGHRTASNTGGFLGPLLTVFYDVDYTKNPKGTNYWRNRVLKVADTLKDEVKDKLKFAIGSASELGHELSEYGMDAAAAVKAPLVALKDAAGRKFVMKDDFSVEGLTKFVKDFVADKLTPYLKSEEIPEDNSAPVKTVVAKNFDEIVNNADKDVLIEFYAPWCG…	3.08	6.06
	A14, 13-19	3	EZ759075	contig00947:1:818:3|similar to Annexin A11 (P33477)|Evalue: 6e-48	1301	31607	52 (22)	78.6	271	5.48	QRRIIEDRYYELFNKDLFDDLKKELSGTLENVITALMQTPEEFSATEVHKAIAGAGTSEEDLIEIMLTRNEQEKIGMREYYGKMFKREVIDDIVSDTSGYFRHLLFAIITTRRQEEDEIYMRQAYHEAYALWENGPKTWSKLRHFTVPIFAGRSYAHLNLMFEDYKTISNIDILKDIERELSGDDEKFFSALVKVIRNKNAYFAERLYNAFKGAGVREATVVRIFVSRSEKDLGAIAMEYQRMYGKSLAQAIKEDFKGDARKVLLDLITLD	17.11	29.14
	A11, 8, 10-12, 14, 16-18	5	EZ759194	contig01620:1:1397:3|similar to Gamma-glutamyltranspeptidase 1 (P07314)|Evalue: 4e-88	1298	51178	51 (19)	49.5	465	8.59	LCINLYHPQSAGIGGGHFYLSYDRATKEALVVDARETAGAAASQNMYLTDSTLTSLKGMKAVATPGEIAGFAEEHTRKGRLPWADLFRPVIDRARQGIQVSPWLSASISAYRNDITGYDEGLKSVFVNPATGDLYKTGEFLFMHKLADTLELVANDSSKTGIFYKGVIAQNLVKEIQAGGGILMTEDFANYKPRVRRPVITQLNDKSTVYGAPPPASGAVMQYLIGIMDQYGYRELNKSWKDMSSPEQDLYHQRFTEAMKFAFAKRMDLGDEDFVDVTKLKEFLTSPQVAQSTRRFIDDFKTSNDPKTYGVQVQTTPGKFGTAHVSVIDKWGNAVSQTSTINTAFGSKKLSLSTGIILNNEMDDFSAYPNQTNVYGLPPSPSNYIRPGKRPMSSSAPTI…	4.39	7.52
	A12, 11-18	8	EZ760357	contig08799:1:1630:2|similar to Citrate synthase, mitochondrial (Q28DK1)|Evalue: 0.0	1285	60830	69 (22)	50.9	542	8.53	IECLRVASQSHSVPETALYYVYSHTVFSQLITRVRDFNCPEFICKSPKIATKMALFRHVSAKALSLTGTQGLTMNVVRCLASESTNLKEVLAKKIPEHNKEVKAFRQAHGATKIGEITVDMVYGGMRSMKGMVWETSVLDADEGIRFRGYSIPECRDKLPKAEGGDEPLPEGLFWLLCTGDIPSKAQVDAISSEWASRAALPSHVLTLLNNFPSNLHPMSQFASAIIALQSESRFAKAYSEGVNKTLYWEHAYEDAMDMIAKLPAIAATIYRNLYRDGSSIGTIDEKKDWSANFTKMLGYKDPMFTELMRMYLTIHSDHEGGNVSAHTSHLVGSALSDPYLSFGAAMCGLAGPLHGLANQEVLVWLTKLMEQFGGKNVTDDQMKDFIWNTLKGGQVVPG…	6.39	7.86
	A11, 9-19	6	EZ758992	contig00520:1:1212:1|No Annotation	1284	46515	50 (24)	54.8	403	9.43	HENVDKYLKTFHGSSAAKLWEEKKYFVFGWRYDKWSDLYVLWHRFPPANTILSYAFRADRQFQYSVENKTVDFMLSSDTKGSLPAFRGQFKPRGSSKNWTHNFEILDDGQRIISGMVDEGAYRLKLRPLLPSVALGHWESTTEGKNLDKLKEVFVDQPLPPLTEKITLSIHRKGDNYVMTSNHSKSAYDMVFKTNTPGKVPLPQGGPLEYVFKYDLATNRAYGETGRAGKKITYNSAHSDRGIYSHYTHNNITVSRLMKRVLPSEFLGVYKFSGKEVNTKGLLSVLSKRQETSATSVFPDKIEFKREAEKWSYIAYDKSGVAVPTELKLGVKYPCFSGASAPTYFTYSAYRELPDNRKVLLTDIWSENPESYIRVISELESDHTLVITWYKQNTVAKRW…	6.3	11.91
	A5, 4-19	5	EZ7692	contig14962:1:769:2|similar to Myosin heavy chain, muscle (P05661)|Evalue: 6e-58	1261	29584	35 (21)	64.7	255	5.1	RTDALIKARGDLESQVKDLESALADAESGTTTVQGQKRKLEQDIQNLKKTIDENEAAIQKSEQEKQSKDHQIRNLNDEMARQDELIAKLNKEKKHLEETSSKTSEDLQAEENKVNHLNKVKAKLESTLDELEDNLEREKRIRGDVEKAKRKLEQDLKATQDQVADLEKAKREGEQAMSKRDVDLNSLNSRLEDEHGLVAKLQRQIKEHVARLEEMEEEIEGERQARAKIEKQRQELSRELEEMSERMEEQCAVQQ	14.9	62.42
	A11, 4-20	8	EZ762083	contig22711:32:1325:2|similar to Elongation factor 1-alpha (P41752)|Evalue: 0.0	1242	47896	109 (22)	65.7	431	8.32	MGKEKVHVNIVVIGHVDSGKSTTTGHLIYKCGGIDKRTIEKFEKEAQEMGKGSFKYAWVLDKLKQERERGITIDIALWKFETPKYYVTIIDAPGHRDFIKNMITGTSQADCAVLVTPAPPGEFEAGISKNGQTREHALLAYTLGVKQMIVAVNKMDSSEPPFSEDRFNEIVKEVSGYVKKIGYNPKTIPFVPISGWHGDNMVEASEKMPWYKGWTVERGDKTVEGKTLLEALDSISPPARPTDKPLRLPLQDVYKIGGIGTVPVGRVETGVIKPGMVVTFAPTGLTTEVKSVEMHHESLPEAIPGDNVGFNIKNVSVKDIRRGFVCGDSKNDPPKESASFNAQVIVLNHPGEIRNGYTPVLDCHTAHIACKFNEIKEKVDRRSGKSIEENPKTIKSGDA…	15.45	38.85
	A7, 5, 7-10, 17	10	EZ759654	contig03994:94:3063:1|similar to Coatomer subunit beta (Q5R922)|Evalue: 0.0	1239	111282	23 (21)	29.2	989	5.41	MVAAKMASTELPCYTLINFGNDGDTPTDIQLKSDLEKGDTKQKMEALQKLIRLMLSGEKMPSMLMTIIRFVLPLQDHAIKKLLLLFWEIVPKTTADGKLLHEMILVCDAYRKDLQHPNEFIRGSTLRFLCKLKEPELLEPLMPAIRACLEHRHSYVRRNAVFAIFVIYKNFDFLIPDAPELVGTFLESEQDMSCKRNAFMMLIHVDQERALNYLSGCLDQVNSFGDILQLVIVELIYKVCLANPNERARFIRCIY	0.95	1.19
	A9, 10, 12, 14, 16	14	EZ759981	contig06029:196:2172:1|similar to Very long-chain specific acyl-CoA dehydrogenase, mitochondrial (P50544)|Evalue: 0.0	1219	71450	33 (22)	44.4	658	9.04	MFSQLSKVTKPQTILSVARSVTTTTSHGAAQAQPETRQPLKPTGEGADPKSANTSPPAAVKDRKSRMDKKAENSSSFVMNLFRGKAVTDHVFPYPNALNEEQSSTLRMLVEPTEKFFVEKNDPAANDEASKVPDSVTKELGELGAFGLQVPTEYNGLGLTNTQYARLVEVVGGHDLGIGIFLGSHQSIGFKGITLYGTHEQKQKYLPKLASGEKFAAFALTEPSSGSDAGSIRCRAVPTPDGKFYMLNGSKIWISNGGFADVYTVFAQTPVKDEKTGEIKDKVTAFIVERAFGVRSGPPEKKMGIKCSNTAEVYFDDTKIPAENVLGGVGNGFKVAMNILNNGRFGMAAALSGTMRAVIKKAVEHATTRKQFGKLIYNYGAIQEKIARMAMLQYVTESI…	2.07	2.46
	A8, 9, 11, 12, 16	11	EZ763113	contig27023:167:1862:2|similar to Heat shock protein 105 kDa (Q5R606)|Evalue: 2e-153	1204	63392	26 (19)	50.8	565	5.79	MSVLGFDFGNQSCYVATARAGGIEMIFNDYSMRDTPTYVSFNPQNRSLGVSARNQLLQNTTNTLYNFKRFIGRKFKDPFXXNKKLKYITFKVEEMADGSVGIKTHHLGQPVTLSVEQVTAMLLSKLKFIAENDIKIAAVDCVISVPVYFTDVERRAVMVAAQTAGLNPLRLMNDTTAVALTYGLYSQELPEPDKPPKHIIFIDVGYASTQIAAVAFNKGKLKMLAVVYEPHLGGRNFDYALLNHFATDFKDRYRIDVWSKPRAVARLRDECEKIKKLMSANATDIPLNLECFFDDKDVSGKVKREKFEELIAPELQQLESKMRDILKELNWSPESVDRVEIVGGSTRVPAVKTLIKKVFDKEPSTSLNQDEAVARGCAIQCAILSPTFKVKDFSVVDVN…	2.04	2.47
	A14, 13-17, 19	4	EZ762458	contig24199:214:1227:1|similar to Uncharacterized protein ZK1073.1 (O02485)|Evalue: 2e-70	1199	38027	36 (18)	66.5	337	6.33	MDMLTSKLQLRTSRCGDVNVWILGDYQQLTNKAVFLTVHDFGSNAQSFDKFINHESMTEVRSRSVWINFEIPGQGESAQDLPLDTKFPSLQEIGEDLVEILNQLHIQYCVGFGEGAGANILTRFAITYPTRVLGLILIHPTATSAGWSEWVKDKLLSWKLRNVGVDPNAEDYLVMYKFGSQTDKGDMENREDLIQQYLADIRKKVNPRNLQLYLDSFLNRSDLTNMLRDKLTCDCLLMVGTKSSFIHTVETMHSSLSPQKSTLLKIDAIGDPLSEAPGQVTRSVLLFCKGLGLLTSVSTPAERARSISQSSNEGIRPGRRMSMQEADVPRRVSLSKS	7.04	10.66
	A10, 11, 13, 15, 16	9	EZ761339	contig18669:1:1620:1|similar to T-complex protein 1 subunit eta (Q5R5C8)|Evalue: 0.0	1175	59613	24 (21)	53.4	539	5.92	LAFASGDHEVSGRQLVMNNITACQVVADAVKSTLGPRGMDKMIVDNNGKTTISNDGATILKLLEIVHPAAKMLVDIAKSQDAEVGDGTTTVVLITADLLKQIKSFVEEGVHPQIIIKSFRKATELAIEKIKELEVKINKGDQQNLRSVLEKCAQTTLSSKLLAMQRNFFSKMAVDAVLMLDELLPLDMIGIKKVTGGALEESLLVAGVAFKKTFSYAGFEMQPKKYDKPSIALLNVELELKAEKENAEVRVNSVEEYQKVVDAEWTILYEKLEAIHASGAKVVLSRLPIGDVATQWFADRDLFCAGRVPEEDLKRVQKACGGSVQTSVQKLTTDVLGTCGQFEERQVGSERYNFFTDCPLTKACTMVLRGGAEQFIDEMERSLHDAIMIVRRALKHDAV…	2.26	3.45
	A12, 7, 8, 10-20	9	EZ759748	contig04581:1:1472:3|similar to Tubulin alpha-4A chain (P68368)|Evalue: 0.0	1174	55209	55 (16)	42.9	489	5.25	SFTTTQSHRISLHYLLLSSQLYRSSEFHFTSPQFLETTSKMRECISIHVGQAGVQIGNACWELYCLEHGIQPDGHMPSDKGAGASDDSFTTFFSETGAGKHVPRAVMVDLEPTVIDEIRTGTYRQLFHPEQLITGKEDAANNYARGHYTVGKEIVDLVLDRIRKLADQCTGLQGFLIFHSFGGGTGSGFTSLLMERLSVDYGKKSKLEFSIYPAPQVSTAVVEPYNSILTTHTTLEHSDCAFMVDNEAIFDICRRNLDIERPTYTNLNRLIGQIVSSITASLRFDGALNVDLTEFQTNLVPYPRIHFPLVTYAPIISAEKAYHEQLTVSEITNACFEPANQMVKCDPRHGKYMACCMLYRGDVVPKDVNAAIAAIKTKRSIQFVDWCPTGFKVGINYQP…	3.51	8.33
	A6, 6-9	6	EZ759453	contig02953:24:1973:3|similar to Angiotensin-converting enzyme (Q6Q4G4)|Evalue: 2e-156	1170	74508	28 (19)	43.8	649	5.5	MNRTIFVLAALFLSSVYCIPLENGSDEQTNNNKVIPAPATIDEVGFSNWVQNVYNPLAEQTLNRDVKAQWTQDTDMTPEHQAAAIATSEQTAAFSKEVAAEVDKFKDVWSNFGNATNRRLYTKMSKLGDAKLSPEDFKKLADLKAKMAEVYSAAQICSDPTITDFNQCPQEKRWNLDPQITAELSRSRDEPMLLHLWKSWRDVSGKRYRAEYLEYVALKNKAAQANGYNNNGEQWRSPYVEPDYKTAAYPNGYSDTDFMKDIDVIWTQVKPLYEQVHAYVRGELIKQYPNLGIRRDGHIPAHLLGNMWAQQWSNLLDITQLYPSLPSLDVTGTMIEKKWNALTMFQTSETFFTDLGLIKMPPAFWDRSMLWKPEDPDRKVVCHASAWDFYDRKDFRIKQ…	1.58	2.88
	A13, 3-26	2	EZ759080	contig00982:1:961:2|similar to Actin-5C (P10987)|Evalue: 3e-137	1153	36658	183 (16)	57.4	319	5.84	IQAVLSLYASGRTTGIVLDSGDGVSHTVPIYEGYALPHAILRLDLAGRDLTDYLMKILTERGYSFVTTAEREIVRDIKEKLCYVALDFEQEMATAAASSSLEKSYELPDGQVITIGNERFRCPEALFQPSFIGMESCGIHETTYNSIMKCDIDIRKDLYANTVLSGGTTMYPGIADRMQKEITALAPSTMKIKIIAPPERKYSVWIGGSILASLSTFQQMWISKAEYDESGPSIVHRKCFXKRAEAWLIEKSAGQSRGCPTNYDCFYEELVWTFVRLWMPVDDRHFCSLKMVLLLLYVRYFSFFTFFRMSKSNLELDVR	33.82	62.7
	A9, 9-12, 14-16	15	EZ759447	contig02931:68:2026:2|similar to Probable succinate dehydrogenase [ubiquinone] flavoprotein subunit, mitochondrial (Q9UTJ7)|Evalue: 0.0	1152	72613	27 (18)	37.4	652	7.09	MISSLKGSASKFAKSLCANSKQHLFSAKGVRAASSSQQISSEYPIIDHTYDAVVVGAGGAGLRAAFGLSELGFNVACVSKLFPTRSHTVAAQGGVNAALGNMEPDDWRWHMYDTVKGSDWLGDQDAIHYMTREAPEAVIELENYGMPFSRTKEGKIYQRAFGGQSYKYGKGGQAHRCCCVADRTGHSLLHTLYGRSLKYDCKYFVEYFALDLLMENGECRGIIALCMEDGTIHRFRAKNTVIATGGYGRTYFSCTSAHTCTGDGNAMVTRAGLPNQDLEFVQFHPTGIYGAGCLITEGCRGEGGYLLNSEGERFMERYAPVAKDLASRDVVSRAMTIEIREGRGCGPEKDHVYLQLSHLPPEQLATRLPGISETAMIFAGVDVTKEPIPVLPTVHYNMG…	1.77	2.51
	A13, 11-15, 17-19	3	EZ761195	contig17982:1:724:2|similar to Actin-5C (P10987)|Evalue: 1e-138	1143	26956	182 (16)	76.2	240	5.31	IQAVLSLYASGRTTGIVLDSGDGVSHTVPIYEGYALPHAILRLDLAGRDLTDYLMKILTERGYSFVTTAEREIVRDIKEKLCYVALDFEQEMATAAASSSLEKSYELPDGQVITIGNERFRCPEALFQPSFIGMESCGIHETTYNSIMKCDIDIRKDLYANTVLSGGTTMYPGIADRMQKEITALAPSTMKIKIIAPPERKYSVWIGGSILASLSTFQQMWISKQEYDESGPSIVHRKCF	149.29	192.6
	A10, 11	10	EZ761290	contig18449:1:1229:3|similar to Putative aminopeptidase W07G4.4 (Q27245)|Evalue: 2e-87	1134	44803	44 (18)	55.4	408	8.14	ARDIGGSDPERMASPRVVEYVKQTFEGVDNVKIDVIDDQGTLEKDFPLLGAVNRAATVIPRHHGRIIFMEYTGEGPIQETILLVGKGITYDTGGADVKAGGVMAGMHRDKCGAAAVAGFFKILSILKPKGVKVIGGLSMVRNSIGENCYVADEIITSRAGVRVRVGNTDAEGRMVMTDVLCYFKERIIQDKLPNPQMYTLATLTGHAVMAAGPAYSLVLDNGPAKKQRNSLRLYDHSEAIGEPVELSSIRREDYEFNAPKSEYEDVVQCNNLPSSRTARGHQSPAAFMIVASGLDKHGIDSQLPIPYTHIDIAGSAGPFPGIPTGTPILGLCARHXIAPHWQYYSMKGLFFQWSFIPILSVTGFVNSAICGSAIRVISVFIFMLQTCVLIVVHVVTIFF…	5.34	6.37
	A14, 13-19	5	EZ761707	contig20321:1:864:1|similar to 60S acidic ribosomal protein P0 (Q9U3U0)|Evalue: 8e-85	1129	30811	51 (18)	76.3	287	8.86	KQMQSIRTALRGQAVVLNGKNTMIRKALRGHIEQNGGLERLMPHVRENIGFVFTKGDLGEVRDMIMANKVAAPAKAGALAPIDVKLPPQNTGLGPEKTSFFQALQIPTKIAKGTIEILTEVHLIKKGERVGASEATLLNMLKISPFSYGLVIRQVYDNGTTYDPQILDVTNDILRARFSEGVAHIAALSLGIGYPTKVSAPHSVMNGFKNLVALAAQTDLSFKQAEKMLEIIKDPSKYAAAMAAAAPAAKPAAAETVKDAPAAAAKPAKKEEKEEEEDEDMGFGLFD	18.44	27.44
	A11, 10, 15, 16	12	EZ762194	contig23192:88:1508:1|similar to Alanine aminotransferase 2 (Q8TD30)|Evalue: 3e-172	1127	53019	28 (20)	51.2	473	6.2	MASAKSEARSENVDGKDHRRILTLSSMNPHVKALEYAVRGPLVIRAGEIEAELKRGDKKPFQEVIRANIGDCHATGQIPLTFVRQVMAVCMDPGLMKTGNYPSDVKERAHDILASTRGYSLGSYSDSTGLETIRKHVAEYIMRRDGGIPSDPEKIILTAGASEGIKSLLELLNTEDNGKRPGVMVPIPQYPLYSATIAEYNMQQIGYYLDEDNKWALDIHELQRALEDARKECAPKVLCVINPGNPTGQVLTEKNIQQIVEFAYKERLFLMADEVYQDNVYAADSKFHSFKKVMTQMGAPYNQIELASFHSTSKGYMGECGIRGGYMEVINMDKDVFAQLKKMLSAKLCPTTAGQACMDTLVNPPREGDPSYDSFMKXEELVLQTLAERAKLVADTFNS…	2.54	2.93
	A5, 4-14, 16	6	EZ761652	contig20070:1:1807:2|similar to Clathrin heavy chain (P25870)|Evalue: 0.0	1126	70031	23 (19)	38.2	602	5.29	NASAIQVLIENIKNLDRAYEFAERCNEPARMESIGQSTVENGQVKEAIDSYIKADDPKEFREVVRVASEHDKWEDIVRYLQMARKKXXRDSYVETELAFALAKTNRLADLEDFVSGPNHASVQLVGDRCFENGMYDAAKLLYNNISNYGKLAITLVKLGQFQGAVEGARKANSTKTWKEVCFACVDNEEFRLAQICGLHIVVHADELEELINYYQDRGYFEELINLLEAALGLDRAHMGMFTELAILYSKYKPSKMKEHLELFWSRVNIPKVLRAAEQAHLWSELVFLYDKYEEFDNAVVTMMQHPTEAWRESHFKDIITKVANIELYYRAINFYMDYKPMLLNDLLLVLIPRMDHTRAVSYFRKINQLPLVKPYLRAVQKLNNKTVNEALNELLIEEE…	1.62	3.3
	A8, 4-18	12	EZ760561	contig10543:1:889:2|similar to Filamin-A (Q8BTM8)|Evalue: 1e-72	1124	31907	48 (18)	73.2	295	8.52	AFHVNTHGVKGQVSATVTMPNGKXEDANISPIDTESYAVRFMPYENGIYFVNVKFNNAPIRGSPFRIRVGKEEGDPAQVLAHGKGLEATKTGTQAEFTVNTLKAGAGTLACTIDGPSKVAMDCSEVDEGYKIRYTPLAPGDYFVAVKYNGRHIVGSPFRVPCSGQAKGGSGQAGFKESNSVMVETVTKSETTTKVQNLLHHSTDVGKVVAKGTGLEKAFAGKQNTFTVKADAAGNDMLLVGVYGKNKPAEEVHVKHMGHHAFTVNYLLKERGEYVLVVKYGEEHINGSPFFINCV	22.91	36.73
	A11, 10-12	13	EZ762407	contig23953:1:1637:3|similar to Aldehyde dehydrogenase X, mitochondrial (P30837)|Evalue: 0.0	1120	59563	38 (19)	40.6	544	6.92	STVVSSAVCLVFKGIXEDVIAMFHLRNASNNAFSKSALWTQGGRGRTAATAAMPQPHRRPEVHCKGIFINNEWHDSQSRNRFTTVNPATGEPICEVASGDKSDIDKAVKAAQSAFKLGSPWRRMDASERGHLLLKLADLMERDRVYLASLETLDNGKTFTNSFNVDLEMSIRCLRYYAGWADKNHGKTIPVDGGYFSFTRHEPVGVVGQIIPWNFPLLMQAWKLGPALAMGNTVVMKPAEQTPLTALYVAQLVAEAGFPAGVVNVVPGLGESAGAALANHANVDKIAFTGSTEVGHKIMEAASRTLKRITLELGGKSPSIVLDDVNIAEAVEATHEGLFFNHGQCCCAGSRTLVHSNVYDEFVDKASERASKRKVGDPFDSKTDQGPQIDNEQMEKILG…	2.26	2.88
	A8, 8-19	14	EZ759112	contig01168:22:1775:1|similar to Trifunctional enzyme subunit alpha, mitochondrial (Q8BMS1)|Evalue: 0.0	1107	63836	29 (20)	51.9	584	9.17	MFDKIERSPKPVVAAVYGPCLGGGLETILACQYRIAVKDKKTGFGLPEVMLGLLPGAGGTQRLPQLVSLPNAMDMMLTGKTVKADAAKRMGLVDLVINPVGPGLSDPDTNTMNYLEYSAVQAAKDLATGKLKPNRKRPLMERVMKWAFGTQYGRNYVFNTASAKVKKQTGGLYPAPMRILDVLKQSLIGXPGSGYEAEAKAFGELSQTRESKALIGLYHGQVQCKKNRFGEPQRPVKTLAVLGAGLMGAGIAHVSIDKGYKVLLKDMSLKGLARGQEQISKGFETAVKRKKFTSFEREQMLSNLVPTINYEGFQNVDMVIEAVFEDINIKHRVIKEVEPLLPEHAIFASNTSALPITDIAKASRRPDKVIGMHYFSPVDKMQLLEIITTDQTSQDTAAS…	2.34	3.95
	A13, 11-16, 18, 19	4	EZ761499	contig19308:1:1054:3|similar to Serpin B3 (P29508)|Evalue: 2e-45	1107	39317	37 (15)	59.1	350	5.37	VSYTETFTFHSVTSFLKPAFLTFVLLXFISVISVPQRLVMSASKDLAAPVTNFSFALYKELQKQSKDGNIIASPLSIYSCVLLAYSGAEASTKAEIEKALYLQNDFNGKSDVLSAFSEVMKVLNPQSKGSEAQYQLAMANSLFVDKALSLKAEYLKNAEQHFRAQPSTEDFKGDSDGARERINSWVEELTRQKIQNLLQPGAVTSATLMVLVNAIYFKADWEKEFKEESTVKQDFRGYGQTFNVPLMYRKAKMLYAHHESAKFQYVELPYKQGELSFCVVLPDDDNGLKNLESNFTPEMLVEAASQTREVKVEFSLPKFKLTEEYDLGDVLPSLGMKSLFSNANLSGISD	4.46	6.98
	A17, 14-20	2	EZ762600	contig24625:236:982:2|similar to 14-3-3 protein zeta (Q2F637)|Evalue: 2e-123	1096	28345	84 (16)	67.7	248	4.84	MTEKDELVQRAKLAEQAERYDDMAGAMKSVTELGVELSNEERNLLSVAYKNVVGARRSSWRVISSIEQKTEGSEKKQQMAKEYREKVERELREICNDVLQLLDKHLIPKASNPESKVFYLKMKGDYYRYLAEVAVGDNRNSIVETSQRAYQDAFDIAKSEMQPTHPIRLGLALNFSVFYYEILNSPDRACHLAKQAFDDAIAELDTLNEDSYKDSTLIMQLLRDNLTLWTSDTQGEGEGEDTADQGNG	11.92	17.71
	A12, 11-16, 18, 19	11	EZ759248	contig01924:1:1561:2|similar to Cytochrome b-c1 complex subunit 2, mitochondrial (P23004)|Evalue: 7e-64	1084	57584	41 (19)	50.5	519	9.26	ITPGTKPNRKGFSVTTGLLPLSHQNRVEQILNLTFASLLNXEASVRVPFWVYYRQESRQKMHTQVLKRNATSFAKITASSKTTPPPPRSNAYVRQALPEQDLKVTKLPNELQLASKETNSPLCRIAVAVKAGARHEAAEYPGLTHALRSYAALSTKQCTGFGLSMNLGHMGAQMRCVTTREETIYVLECMRNKVDEAMKFFSAPITQPEFRHYEVKDAAERFTFDVNCYKAQPELRAVELLHKAAFRGGLCNSLYAPAFAVPHFSGKVLKDFVKTYYTANRMSIVGFGMSQEQLQQYANSYFPVPSKMPVNDEASRYGGGEIHHETLDFQVYASVATEGAPLSRMRDVLALNILAQIVGTAPNIKYSGGMGSSRLIRAAAQVTHNAFGVGAMNLSYSDS…	3.01	4.85
	A12, 11-14, 16	13	EZ759163	contig01462:37:1185:1|similar to Vitelline membrane outer layer protein 1 homolog (Q7Z5L0)|Evalue: 3e-23	1080	42823	48 (17)	58.4	382	5.27	MAAVYLSLLPFLLVFVGVFAQSKDWIDGGRKEIEGGSHDWGDWHDWEFCPDGMYVYGMQLRTEEWQGNNGDDSGLNAMRLSCAPLGVYQQYRAIESYGGLWGKWGKEYRCVHSLMQGMNVRDEPWQGDNGDDTALNNVKMICSNDQVFEGDGSGWGNWEGDKKCPKGYAVCGIKVRFEKDQKKGDDTALNRIKLGCCKVKFETCTPRDNWATLLRCDNSLSDSPSSCKYTQEIGTSMSSTDSATLRKEQQLQFSVTAGVEVGGDIYGFKSSFSTTLGTSETTGYEWTRSEARTFSEVVTTEAQFNIEPRKIKLLEQVVGECGAGTLKTPSFRFRDEKPQTGYAAMKATGVGFSEGKHIPTVKADPTTNGTSGSNLTVARTAS	10.61	14.7
	A9, 8-10, 16, 17	17	EZ759399	contig02692:53:1738:2|similar to Basement membrane proteoglycan (Q06561)|Evalue: 6e-05	1074	64773	38 (16)	38.7	561	5.14	MKYLVLVPFVACLVYAFPSIEREKRQVKPAAQEADSLLDEVTDAPTTTTTRAAPKILWANQTVPCEKGFYRNPNRVKSNPVDIKINCRVFYTCSYGGPIRQVCAPGTYFNVINQVCEGEDGMTIENCAIDRKEDYKPATTPRPILNSTNCQATEFSCADATCLPRDRFCDNKPDCKDMSDESFCAIDEDPQRAAPCNLDLCLLPDCFCSKDGKRIPEDTPVAQVPQMVLLQFEDAINDNNIPIYESLFDGSRKNPVINCPIKVTYFVSHLYNNYQFLEKLSKDGHEIALKALDNEREEKYWNKAPEERLARDFLTNRKIVSKFGRIPEDAMRGMRIPFMRGSGNAQFAFMQHNGIKWDSSISVEPRDVPVWPYSLDYRIPHKCYPINVAQCPARAFPGL…	2.44	2.98
	A7, 2-18	11	EZ760799	contig13127:1:930:1|similar to Myosin-7 (Q91Z83)|Evalue: 1e-116	1071	35646	33 (16)	64.5	310	5.33	KGTLEDQIVQANPVLEAFGNAKTTRNDNSSRFGKFIRIHFGTSGKLSGADIEEYLLEKSRVVFQQPLERSYHIFYQLMSGAIPGLLERLLLSTNIMDYHLVSQGKTTVEGMDDVKEMKDTDYAFNVLGFSPEEKEQVYSVVSIVMNFGEQKFKQRPREEQCEPDGTEYIEKVGHLSGVSPALLVTALTKPKVKVGTEVVTKGQTKDQSTFAVLALCKAIYKLLFSWLVVRVNQTLETKAKRQFFIGVLDIAGFEIFDYNGFEQLCINFXHEKLQQFFNHHMFVLEQEEYKREGIDWEFIDFGLDLQACIE	6.08	46.57
	A8, 5, 7-12	16	EZ759121	contig01222:177:2288:3|No Annotation	1070	78069	26 (19)	32.4	703	9.54	MENVRDSDKTDKTVELKETVTASGSARNPKTTIESTKTTTTTPVDTTAGASSTAKDTKAKAVKKVTAPSTTATPTTTPTTTTTTTTATSLSALPTDRRDVASTVPLIREPVTTERVFPERKSFSKTPREPTPFQEYTPLKGFQPTLSTKTSKFAQYGMLAVIVAVALGVIGLCIFYAPSGYGTAPVDTTPVVVIPVRNRNRTREEALEERMDLFIPIRGERIYGNAHVIRQVTVAGATLSPLEITVNASGLESGHRYGVTLEGTTNQQNTRNNENAEQNTGNTDRNTDRQRLIQAALADADQRNRENYQNTLSINKKNVDDAFAQINAANQDVNDQNWREIARNNSRTLQNVQQQNXINIKQVITQNEENKQNAIAQAKQQTAVDTQDQHATTERVVIV…	1.19	2.2
	A12, 11-15, 19	14	EZ761148	contig17746:1:1516:2|similar to 6-phosphogluconate dehydrogenase, decarboxylating (P41570)|Evalue: 0.0	1062	56657	30 (17)	45.2	504	8.32	RTSILRVTRKTRRQMLRMTHPAEPQADIAVIGLAVMGQNLIMNMNDHGFVVCAFNRTVEKVEHFLANEAKGSKVIGAHSVEEMVSKLKRPRRIMLMVKAGVAVDDFINVIIPHLERGDIIIDGGNSEYEDTRRRTRELESKGFWYIGTGVSGGEEGARYGPSLMPGGSKAAWPHVKEIFQSIAAKVDGEPCCDWVGNDGAGHFVKMVHNGIEYGDMQIIAECYHLMRDVLQLTQDEMSQVFDRWNKGFLNSFLIEITSDILKYRNEKGEYLLEKIRDAAQQKGTGKWTTVAALDFGIPVTLISSAVFERCLSALKDERVVASQELRGAPTAPFSGDKGKFIDMLSQAIYASKLVSYAQGFMLFREAAKQYKWDLNYGGIALMWRGGCIIRSVFLGDIKK…	2.47	4.23
	A14, 13-16	8	EZ762318	contig23626:1:835:2|similar to Glycerol-3-phosphate dehydrogenase [NAD+], cytoplasmic (Q27928)|Evalue: 1e-77	1057	30745	25 (15)	70	277	6.12	IPDVVETARDADYLLFVIPHQFMLKTCQQLAGHIKSSAVAISLIKGLYTPEKGKIELLSDLISQTLKIPCGVLMGANIANGVAAGEFCETTIAFKEIAKAKEFASFIQTENFRISCIDDVANSELSGALKNIVAFAAGLIDGLYGDAASNTKAAVIRLGIMEMIDFAEKFFPGGKRETFLESCGVADVITSSFGGRNRKCAMAFAKETQKSIKQIQDEMLNGQQLQGPGTAEEVNNFLKEKKREKEFPLMTAVHYICTREMKADELINQLRNHPVHH	5.35	6.62
	A9, 8-15, 17, 19	18	EZ763180	contig27458:1:2039:3|similar to Dynamin-1-like protein (Q7SXN5)|Evalue: 3e-76	1045	76556	26 (16)	33.8	678	6.03	QRSIGPANTHLAKFRKMDKFIDNFNKLHSVLTTLEQYEDIDLPQIIVVGSQSEGKSSVLESIVQRGFLPRDKTLATRCPIKIEMRTADAPQEGGEKVKINEIKDGHEGMEKECTFEEAAAEIIARQDKLVGPXKNITTKPNNVIVVKVASPRVLNLTLIDLPGFVVNTIDGQADTLPAEIESLAESYAEGKNTIILAVHSASLDIVNSRALLFAKQHDPTGKRTFCIFTKIDQMSKKAAKELLNQSWPDMPWLATCRGVIGVVNRSQEDLEKSLSVPESVNKEEAFFRSLSPELAKKHGSRYLTNRLSEIFAAHVEECMPGIIERIKKHRVEVQRELTELANDSASVAGKTASETVQSAIIEYVRLFTECMRVPPDHARDKFATGARLKTLYVKTFANN…	1.41	3.09
	A10, 4-6, 9-11	11	EZ759604	contig03746:1:1866:3|No Annotation	1042	69524	23 (15)	36.4	621	5.92	SCSLSRDQRYFAVALPEFSPKIVSIFFRSFWPYCCVQEAECQSTYNSGRYGQVLTMYLAKGHLFALLCLLFTVNRAAGQTTTGAPTGSTTPAPPTCSANLRTLPSDPSLQSRIXAIFIASPVDNSVTYICFCGSDYESANIKCHVLDCSPHYANPYTQPYSPRPAPYGPSSYSQGQPQGTYGGPQPDYRGSSPNSITVGPQVAYKEVAYPCWKLKEIRLNTYIYLICFVRNYPSVVLQVVFKENGALDLVPFDTLPYNHLTALYRQGFTSDSHQQCILLAFSSSVPENQVDARLPFNELSPLYYFCAANYKWEFCSNVDIRDARDVTVWSAANAVYAVYTQAISVAFCDAATSTRLSTYTVTPLRIFKINIDIDVQVCTPTALETISTIGTGDSAVTLC…	1.4	2.4
	A10, 11	12	EZ761735	contig20498:1:1715:3|similar to Probable serine/threonine-protein phosphatase PP2A regulatory subunit (Q09543)|Evalue: 0.0	1027	64134	24 (18)	39.8	570	5.54	ELRNEDIQLRLNSIRKLSTIALALGAERTRGELIPFLTDTIYDEDEVLLALAEQLGTFAPLVGGTEHVHCLLLPLESLATVEETVVREKAVESLRIIADQHSVEHLERYFVPLVKRLAQGDWFTSRTSACGLFAVAYARSNVTVKTELRKLFTTLCTDDTPMVRRAAASKLGEFAQVIEVDFLRNELLHDYLILAQDEQDSVRLLAVEAWASIARLLTRDEVEKRLVPILKSAVEDRSWRVRYMVADKLCELQTAIGPELSVSVLVPAYQTLLGDGEAEVRTISAGKLREFCQSLPSEGREGIMMQNVLPSVKMLVSDPNQHVKASLATVIMGLAPVLGNEKTVEHLLPLFLTMLKDEVPEVRLNIISNLESVNNVIGVRQLSQSLLPAIVELAEDGKW…	1.86	2.21
	A9, 10, 15	19	EZ760156	contig07206:1:1594:2|No Annotation	1024	58081	15	39.2	530	5.51	FKLEEIIPAGTTSTTFKPSQVTPATSGAPITEYEFAMPAGKLXKDYVQAALKDFTAEGKTKDQIKADLTAKFGKTSAEYEIKNEEEKITIQMTVPELEKFLYENFKEDKKIEQLPSTSPKQALPASDKGLFASMFGTATPLFDFTVYVPKDAATTAKPVEVFCKACVDAVTTATPTFADAPAAHKALLNQVLTNLKAPKDANVEAIKYSALIKGFEAYAYDATTTSKKIVAATTTGTTAFTAADFKYADIVKPETFLEKFFYSFGEFDSTKSMPRNEILLDYLLAVDKKAPITGCASFQEALSNLLKAVETDLAITPNPTKKAFKAADPAAINFFLRSIKIGKDELQKSMEEIATAKFQFKVAPEEIKVPAEKTPFTAITTPTGPSVKCAKFPRKSTDT…	1.29	2.4
	A16, 1-20	2	EZ762572	contig24526:125:971:2|similar to ADP/ATP translocase 1 (P02722)|Evalue: 6e-119	1023	31099	51 (19)	64.9	282	10.03	MAKGGGFDVANFLKDFAAGGVAAGISKTAVAPIERVKLLLQVQHASKQIAVENRYKGISDAFVRIPREQGFLSFWRGNLANVIRYFPTQALNFAFKDKYKQIFLSGVNKKTQFWRWFAGNLASGGAAGATSLCFVYPLDYARTRLAADVGVGGQRQYSGLADCIGKTFKSDGLKGLYQGFAVSVQGIIIYRASYFGLFDTVKGMLPDPKNTPLIVSFIIAQIVTTVSGITSYPFDTVRRRMMMQSGRAANDRQYKGTMDCWRKIAAQEGPKAFFKGAFSNVL	9.35	28.15
	A9, 4-18	20	EZ763003	contig26360:1:1109:3|similar to Vitellogenin-2 (P05690)|Evalue: 2e-12	1020	42088	35 (19)	57.3	368	6.79	ADRQEGAYFTPACIEFVKQHTDYLLYKFNVEYTKLSRPTLKLLQKVEQVLHYMYYWNTNVDEVDVYPEQPISQTPADKQMKKFNATIAFSADRRYVNAYYNTTTKKVSMINLRLPREVTPLSAIIPFRPSHFLAFDAPSFCTITGNKMTTYDGLHSEMPLSECYHLMTKDNSPDELFAVLAANIKAQAGPQELNKKIMVVLPGHSIEITAPQGRTPSKVSDYQIVINGQPITEQLSANKPITVPPQTPEHQSIAYITLVNPESDGDKEPIIAVISRVAKFRVHFDGKTIVVLPSIYYKNDLAGLCGNYNNVAFGDDVLPESLSTERQMERAEDEYEWSRAFIVQKDNCKADIPQDKKTNLRQSKSKRN	4.28	33.27
	A11, 10-13	18	EZ758971	contig00405:208:1710:1|similar to 4-aminobutyrate aminotransferase, mitochondrial (P50554)|Evalue: 2e-159	1009	56682	26 (18)	50.2	500	8.46	MIAIKQIPRLIARRYPTTNGTRYAHKWAQSMPQQQTYVAGEPLGPEMKTQVPGPKSQQQIKELAEIQNSKAVYFFTDYQESRGNYICDIDGNVMLDTYMQISSIPLGYNHPDLLKVSQSSEYQALSINRPAIGNFPPKNFVDRLHGALLSVAPKGLRHVQTMACGSCSNENAYKVMFIWYNLKERKGKPYTDAEMQDCIINQGPACPDLSLMSFKGAFHGRTLGCLATTHTKPVHKMDVPTMDWPIAPFPLYKYPLDNNVQHNNAEDEKCLKEVQNLFNQYKTKGKPVAGVVIEPIQSEGGDVHGSPHFFRELQKIVKKNGAALLIDEVQTGGGATGTMWAHEQFGLESPPDMMSFSKKMLTGGYYFADHMDMAEPYRIFNTWLGDPTKIMLLEETLKT…	2.09	2.87
	A10, 9-11, 16	13	EZ762528	contig24382:1:1710:1|similar to Putative mitochondrial inner membrane protein (P91928)|Evalue: 1e-41	1007	62810	29 (22)	41.5	569	9.2	FAKMLSIPHKSRIVLRHKSTSSSDFPTYPSNRKGGRGALALVALSAAAAGAGYYYYTYYYNNNAKIPTKALSSASLPSLMKTDPTKEAKPIVKPIIRDAAKESAKPDSTKLDLRPITTAATPNGIDTPEKLNLSSTSNAEKDATRKMTDITAKTTAVGSGADAETKKLKDDLSAANKKITDLTAQLEKFLKGAGQTAAAKTPKVDTTKAKDSKVDTLSTVAGAAAGAAAASTVAPVVELPKEVMRLAAQLLGREITAEESTTLRQILSTARQDIELEFDHQFYELEEAFEEELQLQLKRQIIAQNDSLQETLKRQELELEKTFQKRMERAVAEERDRLNQTIAGNIARVKGFETGFSERTKMEKVQQRAQQLWHAVQAFNGAVQYSASGDGSWEERLKP…	2.23	2.44
	A8, 10-12	19	EZ762008	contig22325:365:2581:2|similar to Uncharacterized family 31 glucosidase KIAA1161 (Q6NSJ0)|Evalue: 2e-110	995	84298	23 (18)	34	738	5.74	MAHHSLQKSCKMLYISCLILGAFLLYPVFCQTVSWNMALDDAMIRVEKIQQRPVISLDIASFDRSSTFNIELGSPLTRIALVTQCNNAPRNQICLNIDSNGGRMQMRVTNDYADRTNPDMKCSVVQWSGPLDSDLQNCIDLGTANWYGGGSEFQQNWPNNGIPKPMSPFLSGDTMQPNRSYGALLEPFWISTDGLLIAANASRDFFQPLHVSWNEGNSNKLCLLSRYRDSPYRIPTNKAQNELQYTICTGSDVSTLYRASLRESRFWDKPKGTPEMSVIDKPIWSTWVSYKQSISQKDIISFASNIKNRGFPASNIELDDGYQENFGDVTFNREKFPNVQEMVSYIRSLGFNVTLWMHPFINYNAESFTEAMDKRFLIRSQKRDIPAMTSWWDGRFAGL…	1.15	1.39
	A15, 13-19	3	EZ762536	contig24401:1:658:2|similar to Malate dehydrogenase, mitochondrial (Q5NVR2)|Evalue: 6e-85	995	23465	36 (14)	79.8	218	8.85	DLVDACAKFCPKAMIGIIANPVNSTVPIASEVLKRRKVYDEKRVFGVTTLDIVRANMFIAEKKGLDPQQVNIPVIGGHAGITIIPLISQATPSVSFADDELDKLTKRIQDAGTEVVNAKAGAGSATLSMAYAGARFGFSLLKALNGDSNVVECAYVKSDITEATYFATPLKLGKNGVEKNLGLGKLSKYEEQLLSKAIPELKSSIKKGEDFVNQTFKG	15.53	25.04
	A9, 8, 12	22	EZ761431	contig19028:34:2268:1|similar to Glycyl-tRNA synthetase (Q9CZD3)|Evalue: 0.0	988	84495	24 (20)	35.3	744	7.21	MLYRVSLSRCVFASFVSHFSGAALQQNRTLFVTHATLNNSWGSKKLRERQLIKAKSVIMSSPDLEQHLAPLRSAVKEQGDLVRNLKDNKGSDNDLARAIAELKLRKRVLEDKELELTKSSEKEFDRVRMEDLIKRRFFYDQSFSIYGGVTGLYDFGPMGCAIKANLLSAWRKHFILEEQMLEVDTTCVTPEPVLKASGHVDRFLDYMVKDVKTGECFRADHLIKAHLEDVLKDKKQDESKKQRARDILGTLDNLSKDGFQSAISEWSMKSPITGNALSEPVEFNLMFGVSIGPTGLVKGFLRPETAQGIFVNFKRLLEFNQGKLPFACAQIGNAYRNEISPRSGLLRVREFTMAEIEHFVDPTNKDHPKFDDVRQLQLTLFSAVNQMEGQSAQKVAIGE…	1.4	2.5
	A9, 16	21	EZ762519	contig24365:121:1860:1|similar to Moesin/ezrin/radixin homolog 1 (Q170J7)|Evalue: 0.0	988	69162	29 (19)	34.9	579	5.62	MGKPVNVRVTTMDAELEFAIQQNTTGKQLFDQVVKTIGLREIWFFGLQYVDRDGDSAWLRLDKKVLQHAIKKEAPLQFKFRAKFFPEDVSDEIIQDITLRLFYLQVKSSILTDEIYCPPETSVLLASYACQAKYGDYSKESHPLGFLSNDRLLPQRVMDQHKMSREAWEERIMNWWLEHRGMMREEAMMEYLKIAQDLEMYGVNYFDIKNKRQTDLWLGVDALGLNIYEKDDKLTPKIGFPWSEIRNISFSDKKFVIKPIDKKAADFVFFATRLTTNKRILALCMGNHELYMRRRKPDTIEVQQMKAQAREEKIMRQQERERLQKEVTAREMADRKLREYEDKIKFMQDEMNMRQKQLAEAQEIIRRQEEQLREVQIAKKKLEEMEEERARLLRDLEDA…	1.78	1.83
	A9, 8-19	23	EZ763004	contig26373:1:1159:2|similar to Transketolase-like protein 2 (Q9D4D4)|Evalue: 9e-134	988	42625	30 (21)	54.9	386	7.17	VATGSLGQGLSCAAGMAYGGKYLDKSNYRVFCVMGDGESAEGSVWEAMHFXESLKLNNLIACIDVNRLGQSEPTSLGHDMDTYKRRCEAFGWKTVVVDGHDVKTLVETFHDARRSEDKPVMVLAKTFKGKGLPGIENEDNWHGKALGDKADASMKAIQDSLKGSESVTMKPEKPSKSDLQPISQTKIQLSDKPDYELGKQIATRQAYGTALVKLATVYPRIIALDCDVKNSTYSENLKKVYPQRFIECFIAEQNMIGVSIGLSTRHRYIPFISTFAAFFARGYDQLRMGAISHANIKCVGSHAGISIGEDGPSQMALEDIAMFRALPGATVFYPSDGVTTERACELAANTPGICFIRTSRPATAVIYKADESFEVGKAKVVRQSET	4.57	8.07
	A10, 12, 15, 17	15	EZ762556	contig24467:1:1384:2|similar to T-complex protein 1 subunit gamma (P48605)|Evalue: 0.0	984	51195	22 (16)	43.7	460	6.06	DGTTSVIVLAGEMLAAAEPFLQQQLHPTVIISAFRQALEDMIAIVRDQASIPVDASNKDEMLKIIGSCLGTKMLGQWGNMAYELAYKAVKTVFLDENGRREVDLKRYAKVEKIPGGSVEDSRVLDGVMINKDVTHPKMKRRIENPRIVLLDCNLEYKKAESQTNIEISKEEDFTRILQLEEEYIKQICDDIIRVKPTVVITEKGVSDLAQHYLAKAGITAIRRVRKTDNNRIGRACGARIVNRTDELREEDVGTQAALFNIEKIGDEYWTFITGCKEPKACTILLRGGSKDVLNEMDRNLNDALNCARNVLLEPKIVAGGGAIEMAVSQLIAKKAEGITGVRQWPYAAVGAALEVIPRTLAQNCGANPIRTLTALRAKHATAGNSTWGINGVTGELVDM…	2.08	2.26
	A12, 16-18	17	EZ762678	contig24956:1:847:3|similar to Phosphoglycerate kinase (P51903)|Evalue: 2e-108	978	30960	26 (15)	66.9	281	5.85	KVTFLNDCVGAEVEQHCAQAKDGEVILLENVRFYIEEEGSGVGPNKEKIKADKGKVEEFRQSLTKLGDVYVNDAFGTAHRAHSSMVGVKLDQRAAGFLLKKELDMFSKCLEKPDHPFLTILGGAKIKDKIQLIENMLEKVDELIICGGMAFTFLKVLNNMQIGGSLFDEEGSKIVQKIMDKAKSKNVKVHLPVDFVTGDSFDKDTPVGSATVESGIAEKKMGLDIGPESIKQFKAIIDRAQLILWNGPAGVFEWDNFSKGTKGIMDAVVEATKRGVTTVIG	6.68	7.13
	A11, 6-20	20	EZ759400	contig02694:1:571:2|No Annotation	973	22160	96 (16)	72	189	8.74	YDMALDTVKATLKSDGEEIKIKYTHDERGAYGTYKKGDIEVQRFYRRLIPDELLGTFEFSGKQVNAETFNKALLGGNKNKHNFSGSKKIELKCEGDKYTETVHYEGGKQMKFDFLLGELGHGTSPNGTKVDYFYSFHTKMGRQVLRGDFWSTDKPHRYFNVNFEWENEKDLVLTYHMDHVVAKRWFKRV	28.24	40.57
	A9	24	EZ762105	contig22786:127:2175:1|similar to Urocanate hydratase (Q8VC12)|Evalue: 0.0	970	76409	22 (17)	34.3	682	5.77	MSHLECLRHGIPVNPLPEWRSRDEFMVHAPIRVHTLTFEEKQLALQNALRYFPSQTHDILAPEFAEELHSYGHIYMYRFRPRFRMMAYHIREYPAKHEHSAAIMLMIMNNLNPAVAQFPDELVTYGGNGQVFSNWAQFWLTMKYLSEMDDSQTLVMYSGHPMGLFPSSPSAPRVVITNGMVIPNYSSRSLYDNMFATGNTMYGQMTAGSYCYIGPQGIVHGTTLTLISAGKKYLNSTDLRGKVYLTSGLGGMSGAQAKAAVISGCVGVIAEVSREALAKRHGQGWLMEVVDDVKECIDRIKSAREEAKPVSIGYHGNVVDLWEALVQHYEETGELLVELGSDQTSCHNPFRGGYFPVQISYEESLEMMNKEPQRFEELVKESLRRQVKAINYLATKGMS…	1.22
	A14, 13-17, 19	10	EZ760139	contig07118:1:1064:3|similar to Probable isocitrate dehydrogenase [NAD] subunit alpha, mitochondrial (Q9VWH4)|Evalue: 3e-159	952	38238	29 (16)	58.6	353	5.51	KTATKAEDSQSQEASNENRTVTLIPGDGIGPEISSSVQKIFEAAGVPFQWEVVDVTPVKGPDGKIGIPQQAIDSIIKHKIGLKGPLATPVGKGHRSLNLAIRKAFNLYANVRPCRSLEGFKTAYDDVDVVTIRENTEGEYSGIEHVIVDGVVQSIKLITKDASQRIAEFAFAYAKANGRSKVTAVHKANIMRMSDGLFLKCCREAAEQNPDIKFNEMYLDTVCLNMVQDPAKFDVLVMPNLYGDILSDLCAGLVGGLGVTPSGNIGFEGAAVFESVHGTAPDIAGQDKANPTALLLSGVMLLRHIGLNSYGDRIEAACLETIKEGKFLTGDLGGKSKCSEFTNEICDKVANMS	4.27	6.04
	A7, 4-14, 18	15	EZ761511	contig19358:1:1646:3|similar to Titin (Q9I7U4)|Evalue: 1e-95	945	61398	21 (19)	50.1	547	5.26	YDFGIVTLDIVGAYAEDSGVWTCKATNSLGSDSVSITLKCHGKPGLLLDTQHPEGLAKIADLEYRDFSRSYTYNEDSKHAPQFSQQLESLPDMNEGDRLHLEAQVEPRGDPNMKVEWFLNGRPLTSANRVRAVFDFGFVSLDVSDLQVRDSGEFVLRATNPLGTSESRTTLKVIGKSGLILDPXHAASLDKIRDLEAHEYASTINADLHEDTSQAAPSFVEGLLPVPELREHQSVHLEAQIAPANDPSMKIEWYHNGRLLQTGSRFRTFNDFGSVGIDILQIIPEDSGEYVLKVSNSLGTVTSSTTITVKGRSSIILDTQMPNGIGKIQELESMLNYKPPEQYDEENKRAPEFTRPLTGPTGKVKEGQSVHIDCLISPINDPSLKIEWYLNGRVLETGS…	1.84	5.46
	A13, 4-19	7	EZ760287	contig08235:860:1596:2|No Annotation	937	27856	51 (14)	56.7	245	5.65	MRIIKEHLQRMTISEPFESAEALKDMIVRLMESDNGRLSQLAVDSVEIAKDFLSAVVNSIQRRLQSSPTLSSLVDQDTFELIRQNIDAIEIPRLEDVDDVLMSAFGMLKAALLRQIKTVGRVENGKVTVQIPHPFKWNSIKSLPQLKDEHLEYGKKLWTRSFNAYKDFTQSGQLPVEMFGKNNSADFYDIDSESEEQMQTTTELYGGRYGAHKGRSSTTQRSRFGASSDEESDSFRGSQESSRHR	14.05	68.46
	A9, 6	28	EZ759312	contig02224:137:2384:2|similar to Lysosomal alpha-mannosidase (O09159)|Evalue: 0.0	933	85555	16 (15)	25.6	749	7.26	MVDKFILLLCLTFATTQASTTKKPADQTCGYEGCNVGSPNMLNIHIVSHTHDDVGWLKTVDQYFYGARNDIQIAGVQYIIDSVIEALSANNKRRFIYAETAFFWRWWQQQDDRTRHKVKKLVNEGRLEFINGAWSMNDEATTHYSSIIENFAWGLRKLNDTFGYCGRPKVGWQIDXFGHSREHASLLTAMGYDGLFLGRIDYQDKDKRDTEKNTEFVWQTSESLGDKADLFTGILPNVYWPPPTFCYDVLCGDPPIMDDKRLDDYNVDERIETFIKLMQQQAAHYKTNHLIVTMGNDFNYQNAHVWYKNLDKLIKXYVNLRQLNGSNVNMFYSTPACYAYTLSKSGQTWNTKSDDFFPYGSGNHSYWTGYFTSRPAMKRYEREASAFLHTCKQIDAIAQ…	0.76	1.01
	A13, 12-16, 18-20	8	EZ761078	contig17490:79:1254:1|similar to Uncharacterized serpin-like protein MM_2675 (Q8PTN8)|Evalue: 1e-34	929	44072	28 (19)	48.3	391	8.37	MARTSGVNLIVDPMIQFGTSLHREIALNQTDNFAISPLSLTVTAVLLLVGSKENTRKELQKSFKLPDSLFRKDDTKFLNLLKRANNDLGFGKTDDSTDYXXEFTSVNKMFVDSNFAVLPSYRSTITEDLFNGAVENVPYAQXPEGQRTAINRYVANQTHDRIKELLPPKSITKSTAALLTNVVYFKGKWETTFPLQMTQKQDFTNIDGSKSKVDMMGYNLDPHLRYFENEDLQYVELKYRNDKFTALFLLPKTVDGIRTVERKLTVEYISDLKNSAQLQKTTLRIPRFRVELDLDCIPLFKKLGINDLFXXPNVANLNGIAPNLFVSLIQHKAFIDVNEEGTEAAAATAVLLGVGATPGPPKEFIADHPFVFAIRNDRTGLLLFTARVAKF	3.56	5.8
	A8, 5, 9	22	EZ763078	contig26801:1:1803:1|similar to Pesticidal crystal protein cry8Ba (Q45705)|Evalue: 4e-05	925	67999	23 (18)	35.8	600	6.01	GRGSGVCFAFLAVSSAEAKAENVSWEIAPAAGITIEEGSVEDYLSQSFKILISQAVGEIPKVGGILKEIVKFIWPKATTNIWALIRDQVDKLVNAKIFAYELNERSSDLDGIKENIVSYLKSPADLERGEKLTHIIGDCISLFAKLRNSININQTFVLTVDLAFLHVSALRERVLYGDRYYLKDLSSDEKEKAQKRFVADIEDAVATYHSFVYQHFKNWIDWRWNKVVTWGYTAPDGWIARKSCNEIRDDLLDLHFCKMCVGSTNNQHHFDREAAIVKSAYYYRLEFKLYGIISRIFQLHKLIPGYEKSLAYWPKDYPPLSFGSIQPLTYHFPPSSIETKCTPSMGNNKLTNITEVWVRSEDWIDAMAIEYEGKWDTTSGNANGGTAHSMKFNPHSDKC…	1.45	2.18
	A7, 8, 10, 11	17	EZ760773	contig12755:145:2718:1|similar to Programmed cell death 6-interacting protein (Q8WUM4)|Evalue: 2e-179	924	96196	18	25.3	857	5.86	MVDKCFITIPCKPTAEVELARPLLNSISTLYTGESSQDVNTALEELEKLRKNAVCRILDRHEASLDLLYKYHDQLTSLETKIPSAEHQVAFKWKDAFDKGGLFVGRMALTQASLSFERICVLFNVGAMYSQIAANQNVEYDDGLKLATKYFQQAAGTFQYVKDHILSAIQQDPTPDLYPDTLNALISLMIAQAQEVFFMKAAKEKMKDAVIAKVAAQTEDYYADCMKLMQRDNVRSCWDKDWLSIVAAKQAGYHAISEYYQALVHRGSKEIGEELSRLKTASELMATAKKRFDSSSFPFKYAETVITRDYEAARKDNDFIYHARIPDIKSLNPIGRAALAKPMSPVFPLSERKFVDLFASLVPVAIQQAVGAHKARHTEFVNREVANLREQTQLMNAML…	0.83	1
	A13, 5, 12-19	9	EZ761587	contig19800:1:1133:3|similar to Leukocyte elastase inhibitor A (Q9D154)|Evalue: 7e-57	919	41290	23 (15)	42.8	376	9.01	ANGYSFSVNLFKNIASAYTTDNVFISPFSVEAALAMTYAGAAGSTAAEMAKSLGLPSDRNRAIDAVSAKYVDINNSTERGYTLRSANALFLDKKFNIKPSYQSTLQKKFASNITSVDFAGQSEAARKNINTFVATKTDNKIPELFESGSLSRETKLVIVNAVYFQSEWADTFYEGATKSDSFKLANGGTKSAKFMQQEDSGFGYLDSKALNAQVLEMKYKWGEISMVVVLPKEGSSLSDMYAQLDATKLSQLVSGIQRRKVQVFFPKFKLQKSYQMNEALQKLGIKMVFSDSADLSEMSTARDVKVSKVVQKTFVEVDEQGTTAAAATGIQIVPLSAMVSTEEPVEFRANRPFLFFIRHVKSNAVLFMGQIVDPSQ	2.43	7.09
	A5, 4-20, 23, 24	9	EZ762460	contig24202:107:1017:2|similar to Apolipoprotein B-100 (P04114)|Evalue: 3e-18	914	33965	47 (15)	62	303	6.71	MARIALLVLCIVASALAGPRRDVSAHLLHALQXDSVFESGQSYEYQYSGRAEVGVGYGDARTVGIGFDCKIQVAIPQPCQYTLKVQSCEVLEREGMPQTPDFATIDQELEYIAQNPTNRQSWRPSDKSQELTQQLSKYPIQAIASNGQIEEVLYNEDEPIWVVNIKKAILDALHLKKDLNQQTQLRRPMSLEPSVHGLCPTHYSSHGQSSKVTVKKDLTACIQAPKPQYMMNPLAAFINTTTIAPLFMKAESHCVYTVEQSAIKSMVCREVHSLFPVPFLKGNLSAADANVTQTLKLIGKSGQ	10.28	47.92
	A5, 4-16	10	EZ759176	contig01519:1:1386:1|similar to CD109 antigen (Q8R422)|Evalue: 2e-80	909	51074	18 (14)	40	462	7.78	QCNPRRDTALSLLVYNYLSAAQSVAVVVTVSEGDLPPRVYNTQLNVAPSDGANATFPVKPQLVGNMTIRVELKASEAADALTRVLLVKAEGVKQTFNAPVFIDLRNTSSFSKAVQIPSLPSNVVEGSFKMFVSAIGDILGPTINGIDNLIRLPYGCGEQNMVLFAPNVFVAEYLSSMGRLTPELKDKLVRNMNSGYQRQLTFKRWDNSYSAFGTKDNEGSTWLTAFVIRSFSEARDFISIDNSTLISGLQFLSARQNESGAFYEQGKVYDKEMQGGTGKGLSLTAYVLLAFLEFGPNNTFDDNILNATRYLEFNLKSVADDQSALAITAYALQKAKSRVAQIALDLLETKAKSGNNTKYWAEEEEKEEVDLKHPYWYRWRAPPKNVQITAYGLLTYVQK…	1.56	8.41
	A10	18	EZ760658	contig11536:402:2144:3|similar to NADP-dependent malic enzyme (P13697)|Evalue: 0.0	901	65651	16 (15)	51.6	580	5.8	MARLTQILRAVSKDKTIFGLRARGIDILRNPSLNKGMAFTLPERQVLGIQGLLPPVVLTQEQQVNRTLEAFNRRQNDLDKYVYLAGLQDRNEKLFYRVVSENVETMMPIVYTPTVGLACQKYGMIYRRPRGLFISIHDMGHIFEILCHWPEDDINAIVVTDGERILGLGDLGVFGMGIPIGKLALYTALGGVKPRGCLPIQLDVGTDNEDLLNSKFYMGLRQKRVRGKQYDDFVDEFMEAVVERYGYNTLIQFEDFANMNAQRLLDKYQYRYCTFNDDIQGTAGVALAGLLASLRVTGHRMRDHTVFFQGAGSAACGIANCLVLQMIEDGLSPEEAYSKIWMNDADGLVVQDRPGGMTGAKAIFAKNHPPMNDFKKSLEEVKPSILIGACATGGCFTEQ…	1.08
	A11, 10, 16	22	EZ763266	contig27950:148:1366:1|similar to Probable V-type proton ATPase subunit B (Q19626)|Evalue: 0.0	897	45013	23 (14)	55.2	406	5.39	MTKITHNAPEAMKTNKLAAIRNYHAQPRQIYKTVSGVNGPLVILDDVKFPKYAEIVNLTLPDGTTRSGQVLEVSGSKAVVQVFEGTSGVDAKNTTCEFTGDILRMPVSEDMLGRVFNGSGKPIDKGPQVLAEDYLDIQGQPINPWSRIYPEEMIQTGISSIDVQNSIARGQKIPIFSAAGLPHNEIAAQICRQAGLVKLPGKGVLDDHEDNFAIVFAAMGVNMETARFFKQDFEENGSMENVCLFLNLANDPTIERIITPRLALTAAEFFAYQCEKHVLVILTDMSSYAEALREVSAAREEVPGRRGFPGYMYTDLATIYERAGRVEGRNGSITQIPILTMPNDDITHPIPDLTGYITEGQIYIDRQLHNRQIYPPINVLPSLSRLMKSAIGEGMTRKD…	2.1	3.51
	A15, 13-19	7	EZ762252	contig23401:118:845:1|similar to Voltage-dependent anion-selective channel protein 2 (P81004)|Evalue: 2e-41	892	26293	43 (16)	76.9	242	9	MVGEVPPAFVDLNKNVKDLFMKNYFFGFGKIDVTTVTAGGVQVRGVGQQDLGEGTKRAFGSLEHKWTYKPYGLTITERWSTDNMLNLETSVENQVVNGLKTTFIAGLSPQTGKRSASILFAYKQPYFHATTDVDLDFAGPVVRSSAVTQYQNFRLGGHVIFDSARSAITRYVLALGMAAGRYVLHGAAINLRDFEMGVWNRVDPRIEVGFQSNFSSTSGAGSLAVGAKYDLDAGASVKAKVD	9.9	22.08
	A7, 3-20	18	EZ759725	contig04440:420:1643:3|No Annotation	891	46270	21 (16)	48.6	407	6.84	MPYXKGDRQLEILINYPSLSFGGACSFFEKCKEYGILCSAFDFRTNEGFACNPVTGQPVVEIPEAVLKAAFHPENTITGSLANLTDDSSLNVISTNNTSINGGDLIGGGPNNLGFADQWQRQAYTRNAEFVIVYQNVNFNLLMNLPQKYIYVDAAYAQLTKEQLDQLHRSGKVIIATIWLLTTPNEANRAKLAFKNVRGSDVLYWVKYWEPLWLQYRTQTVKNMAEAGYKAVAFKDADGYVEFVAERKNAKAEIQTFYKSLLAETQKAGLQVFLENSGILAELEESKQAGGVLITRVWSTRIGTETTSFDYLREAQKYIVAGRKLFVNAPTPTEAGACQFYQQCYMLDFLCATFSLQFSGDIQQCSSIRVPDRVRQMIYTQNYWITIQQRSPMKVIWVI…	2.01	11.92
	A7, 7-9, 12, 15, 16	20	EZ759304	contig02179:369:2489:3|similar to Alanyl-tRNA synthetase, cytoplasmic (Q8BGQ7)|Evalue: 0.0	889	78025	18	29.6	706	6.11	MPIFKAIEKGTGSRAYTGKVGEEDTDKMDMAYRVVADHIRTLVIALSDGGRPDNVGRGYVLRRILRRAIRYASEKLNAKPGFLGSLVPTVVEMLGDAFPEVRKDPTTVTRIIDEEETQFLRTLVRGRRLLERTINQSGESKVLSGEVAWRLYDTYGFPIDLTQLMSEERGLTIDKVAYEEARKKGTYHVTGTEYNEHDTSXXLDVHAIQHLKDLNTPLTDDSPKYDYVSEENGKPSDARYTFKSCSGRVLALRTSAGFVEQVSAGEEAGVILDRTCFYAESGGQTFDEGYMLLENKDEFHVNNVQVRGGYVLHTGRLIDGQLRLGDTLTLFVDENRRRLVMNNHTATHILNFALRQVLATGNADQRGSLVAPDRLRFDFAVNNALTIDEVRKAEQISQQ…	1.1	1.59
	A7, 3-10	19	EZ762971	contig26215:1:1901:3|similar to Sodium/potassium-transporting ATPase subunit alpha-1 (P04074)|Evalue: 0.0	889	72357	22 (14)	24.7	632	6.09	CGLITNRRGRHHRNPNRSTFRPYITELERTLESRCTVQSATFKPNQENIPILKREVNGDASEAALLKFVESSIGKIREYRDRNRKVCXDPFNSTNKYQVSIHETEEPHDSRYLVVVKGAPERIWDMCSTIMINGVEEPLTEEWARRFNDAYRELGGLGERALGFCDMMLPEDQFPPGYPFDPEEHNWPKAGFRFVGLLSMIDPPRAAVPDAVSKCRSAGIKVIMVTGDHPITAKAIARSVGIISDGVETVEEIAERLGVPVKNVNPRDAKACVIHGQDLRSMDDQQLDDLLRHHTEIVFARTSPQQKLIIVEGCQRQGAIVAVTGDGVNDSPALKKADIGVAMGIAGSDVSKQAADMILLDDNFASIVVGIEEGRLIFDNLKKSIAYTLTSNIPEISPF…	1.22	4.94
	A5, 3-19	11	EZ762575	contig24531:1:590:3|PREDICTED: apolipoprotein B [Danio rerio] (XP_694827.3)|Evalue: 2e-05	888	22259	30 (11)	77.6	196	4.65	EERCDESAVNEVLEDLLSDVKDEIELGTPAKFNKLVDRMRQCPRLESVVRRMSSGSADEKDAAKYIIVQALIQCATPACTTAFASLINSDELPRAIFEPILFAMSLNQVGNPLFLKELVTVCQQRPSRVCAMTIGALTNKLVTDNEELLQTPEYQQPIRQATDFVVRLLEEQNCEASGILRQIRSEDEATKTIIAL	13.29	38.74
	A13, 12, 15-18	11	EZ759504	contig03263:1:1127:3|similar to Gelsolin (Q07171)|Evalue: 3e-52	885	42916	29 (16)	39.3	374	7.72	SSHQQLKRQLSADAAFEKVARDQTGFYIWRIEKMKLVPVKKEDYGKFYSGDSYIVFSATNVREQGGVDIQPKKFERSADLRIHYWLGENTTIDEQTVAAFKTVELDQMFDDQPVQYREMQGFESMKFLSYFPRGVRYMKGGISTGLQRADTGHKAHLFIIKGQKVPIIRELQTISWSEMNSGDAFVLDAGQHIFIWVGKGANRNEIYEATKIAHIFKDQPGESIVRVEDGKEAELVESQQKLFEKYLPLSEKNKMQKEHIHKDDKWAANHTSQLRLFKCSDASGAIEVKEVKSKDLVKSDLKSDDTFIVDTGRGNFGLWVWIGKKATEKERTSAIDYANAFIKKEGYDPKTPVARIVDAAEPLEFKALFTDNWR	2.8	3.96
	A12, 11-18	20	EZ761074	contig17475:1:1628:3|similar to Mitochondrial-processing peptidase subunit beta (Q3SZ71)|Evalue: 7e-169	884	61434	35 (14)	41	541	6.16	RTQCIKLFVATPINSLRLTRPHFFRVQSVKMSSSIIKASSALISKGLCSNAGITSICANRNVTRMLSVKSDCSSRVLKPNRRLITGRNARSAATQSAVSYEQSIMNSPETIVTTLKNGLRVASEDSGSPTCTVGLWIDAGSRYENEKNNGVAHFLEHMIFKGTSNRSQMDLEMEVENMGAHLNAYTSREQTVYYAKCFSKDIDHSLDILSDIIQNSQFGEEEIERERGVILREMQEVETNLQEVVFDHLHSIAYQGTPLGRTILGPTENIKSITRNDIIQYIDNHYKAPRMVLAAAGGVDHDKLVKFAEKYFGNISFLYPGEIPEMPKARFTGSDVRVRDDDMPLAHCAIAVETVGWRDADNVPLMVANTIIGSWDRTHGAGSNVSNKLGQYAGETGSC…	2.88	3.99
	A14, 13	15	EZ762765	contig25322:103:1317:1|similar to Malate/L-sulfolactate dehydrogenase (P16142)|Evalue: 3e-60	882	43638	27 (18)	66.6	404	8.09	MRKSISRLHTYYSTLQKQSHIHSSAVQLRAFAKVKATIMAQMEVLEADRVVIPVSEARSFIERSMTRVGVDPSHAQQLADVLIMGDMRGHFSHGLNRLDMYIKDIKAGTCNGSGVPSILKESPSTALIDGNNLLGPVVGNFAMDIAIKKAKETGVGWVAARASNHYGIAGYYGLRACDQGLIGLSFTNTSPLCVPTRAKANALGTNPICFAAPAANGDAFVLDMATTTVAIGKVELAMRKEESIPNCWGVDGEGKMTTNPAKVYNDGGLLPVGGIEENGGYKGYALNMMVEVLCGILADAAFGPLVRSWKKPVGEANLGQCFAAIDPSGFGDEFGQRLQTFMNILRSMEPADPAKPVLVPGDPERIHMAKIERLGGIPYHINQVTHGEEVAKTLGIDPM…	3.98	4.06
	A10, 4, 5, 9, 12, 13	19	EZ759046	contig00802:105:1658:3|similar to Aspartyl-tRNA synthetase, cytoplasmic (P15178)|Evalue: 0.0	881	58341	20 (15)	32.5	517	6.02	MADEVQKENESEQQKQSKKAQKKAEKAAKKADIIAEKKAASSADTTGAETETADFAKDKYGDLPLIQSSVKVDRTLVKLKEVNASMADKSLWMRGRLQTSRAKGKQCFFVLRQQQYTIQALVAVSDSVSKQMVKFAAAISKESIIDVRGTVRTVTQKIEGCSQQDIEVHVEELFVVSASEARLPLLIEDAARAENAESGPQITVNQDTRLDNRVLDLRTTTNQAIFRLEAGVCKLFRDSLDKMGFVEIHTPKIISAASEGGANVFSVSYFKRSAYLAQSPQFYKQMAIAADFNRVYTIGSVFRAEDSNTHRHLTEFIGLDLEMAFAYHYHEVVDTIGQLFVEIFRGLEAYYKDEIDTVNQQYPSEPFKFLEKPLRLEYLEGVRMLREAGIEMGEHDDLS…	1.4	2.36
	A11, 10-15, 17, 19	23	EZ761377	contig18815:36:1291:3|similar to Tyrosine-protein phosphatase non-receptor type 4 (Q9WU22)|Evalue: 4e-41	880	48010	27 (14)	46.7	418	9.13	MQTQEFISSSENGFGSQQSNRQGDVRQAVHEVYTNFRNGILLQEFANLPARNDKFTSRFAFRDSNKHGNRFDDRVPYDWNRVALVNTYQNSNHQNSDYVNASRVKVDIGNEETDKFIAAQAPHDDNINVFWQMIWENSINIIVMLVDLQNTKGEAKSAKYWPNESQTLNFGKLDVTLLSQQNADNRSVVVRQLQLKNNQSGQSRQVTHYQYVVSKKRNSVDDSAAFLDFVNYIRQSTSKNGGQNGRNKAQMLVHCKDGCGKTGCFILLHSYLAALDNNYVVDPIKQLSQLRDQRPNMIRTPEQYRFVLEAILRAADERGLLVDERRSVNASRPESAYDETASINGSIQSSASHKENTQTQEMIRESHTTVESHSDSKKEKPQPSERQQKKEEIQVKEQK…	2.09	2.95
	A9, 8, 16	29	EZ762042	contig22510:1:1960:2|similar to Glucosamine--fructose-6-phosphate aminotransferase [isomerizing] (P14742)|Evalue: 0.0	873	73442	20 (17)	37.4	652	5.99	LEDAVMGDATLADETIYDVHCGIAHTRWATHGAPSSLNSHPQRSDDTNEFVVVHNGIITNFKDLKKFLETKGFVFESETDTXXVIPKLLKHFYDHHSQSSFRELVXVAIQQIEGAFALAIKSRHFPGECVATRRGSPLLVAIKSAHHLTTDYIPVLYSGDKEKTHANYHPPIRNNLTNGIAVNGLGSNGHAHQITTLNGTDKAPLESQDSLTEFKPLDEQQEIEYFFASDASAVIEHTNRVIYLEDDDVAYTTAHGGLSIHRLQRALDPKEPTSREITTLRLELQQIMKGNFDYFMQKEIFEQPESVFNTMRGRVFFDQTNVVLGGIKDFIPEMKRCRRLLLIACGTSYHSAVATRQLLEELTELPVIVELSSDFLDRSTPVFRDDVVFFISQSGETAD…	1.29	1.88
	A7, 5, 8	21	EZ760153	contig07181:1:2433:1|similar to Puromycin-sensitive aminopeptidase (P55786)|Evalue: 0.0	872	93415	18 (16)	29.1	810	5.86	KLQDGTQLTSRDLQYHKEMERVVLEFERMLPLGSGQLNIKFTGLLNDKLRGFYRNTYTVNGEERVGACTQMEACFARQCFPCWDEPALKATFDITLVVPRHLVALSNMPIVSEKALESNDKWKVVEYAQTPIMSTYLVALVVGEFDFLEDKTEDGIVVRVYTPLGKREQGQFALDFATKTLPYYRHFFTLPYPLPKCDLIAVANFAMGAMENWGCITFRETALLIDPHNSSAASRQRVALVVGHELAHMWFGNIVTMEWWTDLWLNEGFASFVEHLSVENLYPEWKIWNQFVDDFFSRAMRLDSLRSSHPIEVVVGHPDEVEEIFDDISYEKGASVIRMLFHYLGEDGFRSGLSKYLKDFEYKNAKTTDLWRHLEAATNKPVAAIMGDWTGEKGYPMVS…	0.8	1.58
	A11, 4, 10-13	25	EZ759370	contig02546:210:1267:3|No Annotation	870	40721	26 (15)	39.2	352	6.72	MVTRKAAQFYQQNSKILTGWSYNDHTDYFVHWYRFLPANVSASFSFRYNETGITVFGDDVVEHQFTAETEGDTGTLHGKFNVRGTDKSWTKDYEIQEDGNMLMTVKVGEVNAKILFRPTLHSRAQGLWEATSEGTNLEKLGEIFKNSMWPKDEKFRVCIKREGDHYVKTVNMSSGLQKHEFKINKPGKFKIGEKEVEYTHKYDIALDTVEATLKSDSEEIKIKYTHDERGAYGTYKKGDIEVQRFYRRLIPDELLGTYEFSGKQVNAETFQKALHGGEKSEHSSSGSKKFELKCEGDKYSETVHYEGGKQMKFDFLLGELGHTTSPNGTRVDYVYSYHTKMSRQVLRGDFWS	2.77	4.95
	A10, 11	20	EZ761829	contig21097:128:1681:2|similar to Glucose-6-phosphate 1-dehydrogenase (Q29492)|Evalue: 4e-160	868	60248	20 (17)	40.8	517	6.57	MSKEGNMSKESNNRDKTSSPEESAAEPWEWDTGLYTFTVFGASGDLAKKKIYPALWMLFRDELLPRKSIFVGYARSKKTIDQLRSDFEPHCKVEPKEKEKFEQFMKCNVYIAGSYDKPEDYKRLDAALSAEEEKEGEGNRVFYLSLPPFVYAETTKNLKENCWGKKGWNRVVLEKPFGRDLPSSQELSAHLAKYYSESDLYRIDHYLGKELVQNILTLRFANRIFHPSWNNNHIANVTITFKEPIGTQGRGGYFDEYGIIRDVLQNHLMQIFCLLTMDKPVSLEAEDIRNEKVKVLRRTETIRLEDTVIGQYIANADGKDEAKSSYTDDEGVPNDSVTPTFSAVVLRINSERWEGVPFILKAGKALNEQKTEVRIQFKRPDGDIFPENSVKRNELVMRV…	1.6	1.71
	A15, 15-19	8	EZ761740	contig20530:1:997:2|similar to Electron transfer flavoprotein subunit alpha, mitochondrial (Q8HXY0)|Evalue: 3e-107	867	34752	20 (13)	53.8	331	8.64	RATVRSFQGALHRCQSTLVLAEHNNEKLASITLNTVTAAQRIGGDITCIVLGTNCGKVAEEASKIAGVTRLLVADDPSLAGFLAERVAPTIAAAQKQFNFSHIIGGATAYGKGIMPRVAALLDVQPVSDVVAFKGADTFVRPIYAGNAILTVKSLDKVKVITVRGTAFEAAAAGGSAKVEKAAIGEFDKSSSEFVEQRITKSDRPELSAAKAVISGGRGMKNGENFKMLYDLADRLGAAVGASRAAVDAGFVPNDLQVGQTGKIVAPELYIAVGISGAIQHLAGMKDSKTIVAINKDPEAPIFQVADVGLVEDLFKAVPEMIKLVDESKKQ	2.93	3.64
	A13, 12-19	12	EZ761273	contig18366:49:1152:1|similar to Cathepsin K (O35186)|Evalue: 3e-31	864	41584	29 (17)	53.1	367	8.48	MKLTLLFVLAFALFASCYCDDGQWEQYKDKHGLTYDDESKEAEHKANFLKQLKLVEDSKTQSQTRGNKDNLIMRKITHLSHLSKAEKKQNLLGLIPEASKATRKLKPQAGQKLVNDYFGSYEKFPGEPAAGYVKPDSLDWTTRGAMTPLTYSQNPCGSCWAFTGVAVLEAQYKLRYNKQIKLSEEFVRDCAYDKRWSDVTRPGCKGGHLFTVYQLASEVAIPSADAYPYIEDDKPHACKVTAGTQFNITGIARVDGDEEMMKALRTVGPIGVTMDADEIMDDKWFGWDGKNPSIMVPRTCTTTVNHAVTLIGYGTEGGVPYWLIRNSWGPNWANKGTFKIKRGTCGITYGVYPCIDGKCTLGRNVLG	2.96	8.29
	A13, 12-16	13	EZ759598	contig03691:1:1595:3|similar to Succinyl-CoA ligase [ADP-forming] subunit beta, mitochondrial (Q9Z2I9)|Evalue: 3e-155	863	59462	16 (14)	33.6	530	5.43	DMSFLVKCTSALSLSSRILTEKPLTCGHCFQQLRNLSLHEYISMGVLRDYGIPVPEFGVAKTPSEARKVAESLDTKDIVIKAQVLTGGRGKGFFESGLRGGVKMVYTPEETAQVAEGMLGQKLITKQTGERGRPCNSVIIMKRLFTRREFYFAIMNDRNTSGPVFIGSSEGGMNIEDTARDNPNAITTLPIDVKRGVSREDCLEFARKVGFADLSDQAVDIMLKLYEVFSKNDCTMLEINPMAEDSSGKIFCVDAKLNFDDNAEFRQSKLFELRDWDQEDPREHEASETGINYIHLDGNIGCLVNGAGLAMATMDIIKLHGGSPANFLDVGGGATAEQVMRAFKLITSDQNVQAILVNIFGGIMRCDIIAQGIILAAENLNIRVPVVCRLQGTNVDDAK…	1.24	1.88
	A18, 16-19	3	EZ761405	contig18919:1:514:2|similar to Peptidyl-prolyl cis-trans isomerase B (P24369)|Evalue: 3e-57	862	18643	24 (12)	69.4	170	9.32	RIVIGLFGKTVPKTVKNFVELATAHTTAPSKDGTLVGYKGSKFHRVIKDFMIQGGDFTKGDGTGGKSIYGERFEDENFKLKHYGGGWLSMANAGKNTNGSQFFLTTVKTSWLDGRHVVFGKVLEGMKVVRKIESTETESSDRPKKDVIIYDSGVLPVTEPFSVSKDNSPE	13.28	17.17
	A16, 4, 13-19	8	EZ760393	contig09093:1:762:3|similar to 40S ribosomal protein S4 (Q95V34)|Evalue: 8e-123	857	28754	47 (16)	58.9	253	10.15	TRGPKKHLKRLNAPKHWMLDKLGGVFAPRPSSGPHKLRECMPLIIFLRNRLNYALTGTEVKKILMQRLIKVDGKVRTDSTFPSGFMDVISIEKTNENFRLIYDVKGRFAVHRITPEEAKYKLCRVKKLGMGPQKVPFIVTGDGRTIRYPDPLVKASDTVQVDIATNKXMDFIKFEVGNLCMITGGHNLGRVGTIQHRERHPGSFDIIHVKDANGHTFATRLNYVFVIGKGTKSYVSLPRGNGIRLSIAEERDQ	12.88	17.01
	A12, 11, 14-18	21	EZ762885	contig25810:71:1195:2|similar to Troponin T (Q9XZ71)|Evalue: 4e-31	855	44245	39 (20)	39.8	374	5.28	MSDEEDNNWMSEETTEQKDEGHEERVRSAAKKAADEPKEEKTEAQRIIEEKQRKHEAEEMENMVELEAQRKAQREREDAELEKLKQKQAQRKKEREEEEKRMEEQKKVFEEQRRIEAEQLKVKQEEDRRRKQEEAERKKAVAQAAGAGGRNFTISKSATEEGGGSTLDKFMNISKAQTEMSLNTHELESLKKRTVADRVKTLSVADLDLHGLKQKAEELWKTIINVETSKYDLTMRQERQDYDLKELNERQRQINKNKYVKMGLDPEANSRFPPKVQLISKYERRTDRRSYADRKGLFDKTREEEKKELARPKAVKRDTWIKDKVEESKRTYDEEEEQESSYTRPSADDDEGYSRPSNTFSSHNEEEEVEAEDE	4.23	6.8
	A5, 5-8	13	EZ760237	contig07806:113:1741:2|similar to Xanthine dehydrogenase (Q54FB7)|Evalue: 5e-91	853	61180	23 (18)	33	542	7.48	MDRWSADFYRERLGIAKNQVDVTCPRVGGAYGSRLTRSQWVAGAAGLACKLVNKPVKMHLSIWDNMKMMGKRFPHYVEYKAGLDADNKLAAVTMTVYGNMGYLKNDSSLSNLKKWLDSIYKCDNWKVSAIPCKTNTPANTHTRGPGSTEAIYFIEYVMEHLAYEAQIPAIELKKLNYYKDGDKTIEEDVLSYVVIDRVTKELEEMSEYEKRTKEIEEFNQKNKWRKKGLSLVPLKYGMQWKDMFYSALVTVYHNGGSVAVTHGAIEMGQGLNTKVAQAVALKFGIDIEKVRIMPSREITTSNSQMVGGSVGSEITVMAVLDACSQILGRMDPIAETMGGLLGKAGWAAIVEACYAKGIDLSAHGWAAPKVDPVAYYTYGLMCTEVELDALTGQFQINRL…	1.57	2.6
	A12, 13, 15, 18	22	EZ762808	contig25483:1682:2388:3|similar to Isocitrate dehydrogenase [NADP] cytoplasmic (Q9XSG3)|Evalue: 8e-107	837	26858	27 (14)	55.1	234	6.26	ALGMYNTDKSISDFAHSSFKYALDCKMPLFLSTKNTILKRYDGRFKDIFQEIYDKQYKSEFEKAGIYYEHRLIDDMVAQVMKSDGGFVWAXKNYDGDVQSDSVAQGFGSLGMMTSVLLCPDGKTVEAEAAHGTVTRHYRFWQKGQETSTNPIASIFAWTRGLEHRGKLDNNQALVDFAQTLERTCVETIEAGFMTKDLALCVKGGLSKVERKDYMETFEFLDKLASELQKRLQK	9.39	11.5
	A11, 10	26	EZ762413	contig23983:208:1734:1|similar to Seryl-tRNA synthetase, cytoplasmic (Q6P799)|Evalue: 0.0	834	58307	14	36	508	5.63	MVLDIELFREDKGGNPQLIRETQQKRFKDVRLVDIVVDKDREWRKCRFETDSWNKWKNACSKEIGERMKKKEDTSGAEELPEFLXNVSLETLKADDLKTLTIAQLKNLRNTVEANIVGTSAKGDTLEAERDAARREIGNLLHETCVISDNEDNNGIERTFGDINAKKQYSHVDLIAMIRGMDGERGTVTAGNRGYYLLGAAVFLEQALIQLALRILHNKGYTPLYTPFFMRKEVMQEVAQLAQFDEELYKVVGKGSEDKEDTTVDEKYLIATSEQPIAAFHRNEWIELDKLPLKYAGISSCFRQEVGSHGRDTTGIFRVHQFEKVEQFVITSPHDGLSWQMFDEMVGNAEQFCQALEIPYRVVNIVSGALNHAASKKLDIEAWFPGSGAFRELVSCSNC…	1.16	1.55
	A11, 10-13	27	EZ762927	contig25991:504:1997:3|similar to Probable 26S proteasome non-ATPase regulatory subunit 3 (O61470)|Evalue: 9e-108	834	56742	16 (14)	35.4	497	7.1	MASMDVDVANGVDGSAEKKDAKSEVEEVVDADTATVEDIKDFVKLIERAVATGEARLVIRPVRALGHVRKNLNAMVLRRAIRGLCSRNDDRKSILQFVEEIADESQYPVFQKLANALVKQGSLIPEVYVYLQLLVLMYLLDNGKKAEALQCAESLMQKVIQNTRRTMDPLGARCYFFYARSHEINGSLSSARKFLLQXLRTATLRLDDDGQAHLVNALLRSYISDNLYDAAEKLVGKLTYPESVHNNQLARFQYYLGRIKATKLQYSEAYEHLLQASRKVPTNSAIGFKQTVQKWLITIELLLGDIPERAVFLEKQYKGVLTPYYHITLAIRAGSLQRFSEALEKFAARFKADETYSLIVRLRHNVIKTGIRTINMAYSRISVEDVAKKIQVDNIEDVK…	1.47	1.65
	A6, 4-19	14	EZ760233	contig07785:1:816:1|No Annotation	831	30617	43 (15)	79.4	272	6.15	NFTKSAVVNMTIGHEAVGVKVDFDAQSSYPVGVPFMPVHPIGQKAYFRILAKPDGQVKSVIMSMYEKSELVRAPEQELINKLKDKMADLNLKDSIKGHLNAPKDYDQVNKYGHSIQLFIQPSNTPAAQQPQSTDAQPTQGPSDYQMRLFLAYLLLXXARYFKTIATFDNKASVGPKAACFLSQVLYPERTALWYLTPENIPFTKNVEGHVEWSFGQQCGTENKVHIHMTAEPTGEQLNLEKESLYDQFGSPVPYSVAHEVHEAEGLFQSLYK	15.15	48.7
	A10, 17	23	EZ762497	contig24293:145:1845:1|similar to Phosphoglucomutase-1 (P00949)|Evalue: 0.0	825	62593	19 (14)	42.6	566	6.17	MAAQYKSVKVATTPFEGQKPGTSGLRKTVKEFQKQHYTENFVQAILTTIGDKLKGSTLALGGDGRYYGTEAVNIIIRMCAANQVSKLIIGQNGILSTPAESCIIRKYKTLGGIILTASHNPGGPDADFGIKYNISNGGPAPDAFTNKAYEVTKSLKEYAIVPEMRVDISTVGVQSFTVDGNKFECEIVDSVQDYCDMMKEIFDFEKIRQLLTGTGHHKKPFAVTFDAMNGVTGPYLQRIICTELGDDASSVVNSTPLLDFGGEHPDPNLTYAHKLVEIMKSGRHDFGAAFDGDGDRNMILGKNAFFVTPSDSLAVIAANTDSIPYFKKNGVKGFARSMPTAGAVDRVAKEKGKELFEVPTGWKYFGNLMDAGRLSLCGEESFGTGSDHIREKDGVWAAM…	1.51	1.56
	A7, 7-17	22	EZ759618	contig03818:1:573:2|similar to Alpha-actinin, sarcomeric (P18091)|Evalue: 9e-103	824	21853	20 (12)	74.2	190	7.68	TFTAWCNSHLRKAGTQIDNIEEDFRNGLKLMLLLEVLSGEQLPKPDKGKMRFHKIANVNKALDFIASKGVRLVSIGAEEIVDGNVKMTLGMIWTIILRFAIQDISVEEMTAKDGLLLWCQRKTTPYKNVNVQNFHISWKDGLAFCALIHRHRPDLIDYSKLSKNNPLENLNLAFDVAEKYLDIPRMLDAE	8.81	15.07
	A16, 15-17, 19	9	EZ760099	contig06824:88:915:1|similar to Chymotrypsin A (P47796)|Evalue: 1e-44	816	29440	25 (13)	60	275	7.59	MKVLLLAVFLFGYAAAQQCGRNAIPQRENDPVQDRIVGGTVVVPGSHPWQCHLARTQSFFGFVSKSYICGCTIISKDWVVTAAHCVAGSSSASSYTVTVGEHDKSITEASQVDHAAAQVISHEQYNGQTISNDIALIRLSTSIQFNDKVSPACLAEASHSPAHGSKAVVSGWGSTVAVRNTRSQSTLLRQAEVAIVSRDQCNAAYGGSIDSTMICAAANGRDSCQGDSGGPLVADVDGKKTLIGVVSWGYGCARPTHPGVYASVAALRSWIDGKM	5.19	6.77
	A8, 4-17	29	EZ759850	contig05208:1:597:1|similar to Myosin heavy chain, muscle (P05661)|Evalue: 3e-50	810	22851	21 (12)	62.3	199	5.37	AKVLRAQLEVSQIRSEIDKRIHEKEEEFEATRKNHQRTIDSMQSSLEAEVRGRTEALRMKKKLESDINELEIALDHANKASAEATKNVKKYQQQIKDQQTQIEEEQRARDEAREQAVSNERRATALQGEADELRNTLEQAERLRKSAENELNDANSRLTELTATATSLSAAKRKLESEFQGLHHDLDEMLNEVKGSEEK	6.77	48.82
	A7, 4-19	23	EZ759327	contig02293:1:648:1|similar to Vitellogenin-6 (P18948)|Evalue: 5e-14	810	24857	72 (10)	51.4	216	4.86	ERFVSEPLSLIPTAFVEPIPETNAIFEEVLKKPIRFNYENGKVKEFETTEEDPSWSINMKRAILTTFHLSLNDKEESAFSQPFETRYGGQSASFKKSQSEDNEYPQFFTVMEDGAAGRCEASYTVLQTPDSDEFVYPQLETVNAGRPIPIPRPTNAQVLNVTKSYNFKNCEYRPFYVHGMHMSGLCPTCEEKPEEWADLIEATAHTRYNISGTAQK	42.96	134.37
	A11, 10	28	EZ760725	contig12053:1:1528:2|similar to 2,3-bisphosphoglycerate-independent phosphoglycerate mutase (Q0STD7)|Evalue: 4e-135	806	56423	22 (14)	39	508	5.59	IVIDGWGISDPKDGNAITAAKTPVMTELSTHKDHYTTLDASGLAVGLPRGLMGNSEVGHLNIGAGRPVYQDIVRINLDVENKKVASNPTFLKACQTAKSAGGRLHLAGLVSDGGVHSHIDHLCAMLESAKANGVPQTFVQFFADGRDTSPTSAVQYITKIVEFMKTLDYGQLATVIGRYYAMDRDRRWERLKIAYDGLVKGTGETVVSADDVIGVVQRRYDAVDDQKQTDEFLTPIVVEGDSRIRDNDTIIFFNYRSDRMRQLVETFGVKLNFESDVQVRNLHITCMTQYNAAWHFPLLYPPINNDNTLSEWISDKGLSQFHCAETEKYAHVTFFFNGGKEKTVAREDRSLVESPKVATYDLKPEMNCAGVAEKMVEALHSNKYQFIMCNFAPPDMVGH…	1.34	1.75
	A9, 10	31	EZ762558	contig24474:152:1993:2|similar to Actin-interacting protein 1 (Q9VU68)|Evalue: 0.0	796	67637	19 (17)	38	613	6.56	MSCKPRNVYAALPRTQRGLPVVLGGDPKGXKLPLPNGNTVIIRDIANPALCDTYTEHSALVNVAKYAPSGFYIASADVHGKVRIWDTTQKEHLLKLEVQPIGGNIKDLSWSPDSQRIVVGGEGRERFGHVFTSDTGNSVGEIGGQSRPLNSVDYRPTRPFRIVTGSEDSSVGFFQGPPFKFDKTINEHSNFVNCVRYSPNGEKFASCGVTXXIFLYDGKDATKQSELKVDDKAHGGSVYAISWSPDNTQLISASGDKTCKLWDVSTGQVIQEYKFGDELDDMQLGCLWQGQFILSVSLAGFIYYLDKNAPQPTRIVKGHNKSVTGLAINKKSQPAQIYTGSHDGSMTYWNAENGENERVTKGTVKPHASQIQGLTLLESGGISKVVTCAMDDLIKNVEL…	1.04	1.37
	A15, 14-16, 18	11	EZ763199	contig27558:255:1303:3|similar to Isocitrate dehydrogenase [NAD] subunit beta, mitochondrial (Q28479)|Evalue: 1e-117	795	38574	17 (13)	40.1	349	8.43	MMISKRGFHHSVSQLSIAPLAKPERRFPVTAIPGDGVGPELMYAVRQLFEATGTPVDFEELFLSEVAYMRSATIDEVAESIKKNGVCLKGVLQSGFESVGGELATLNTRLRRKLDSFASVVHIRSLDGFKTRHMNLDFVVIRETTEGEYSAIEYETVPGLVECLKIVTRAKSMRIAKFAFDYAVKTGRKKVTAVHKANIMKLGDGLFLECCTKIAELYPRIQFNNMIIDNCCMQLVNNPYQFDVIVTGNLYGNIIDNLAAGLVGGAGVVPGESYSHESVTFEPGARHSYAEAVGKNIANPTATILAAANMLRHLHLDYHANLITSALLRVIKVGKVRTKDMGGHATTTD	2.73	3.3
	A15, 4, 5, 13-21	12	EZ760854	contig14228:95:1012:2|similar to 60S ribosomal protein L5 (O76190)|Evalue: 4e-81	794	35143	24 (14)	48.9	305	9.91	MAILKVLKNKQYFKRFQVKFRRRREGRTDYQARKALITQDKNKYNTPKYRMVVRFTTKDIICQIIYAKIDGDKVLCSAYAHELPRYGVKYGLTNYAAAYATGLLLARRLLKKLRLDTIYAGSTEITGAAENVEDIPGQPGAFKCFLDVGLARTTTGAKIFAAMKGAVDGGLHIPHSDRRFVGYNSQNKKFDAEVHRQHIMGLHVANYMRQLAESDDDLYKKQFNRLINDGLNADGIEGLYKSAHAAIRADPSPKKAEKKTYEKKKRFNRKKISLAEHKNRVKQRLAVLTKESNTELTVFCVYEVW	3.62	8.32
	A11, 4-19	29	EZ761340	contig18673:1:499:2|similar to Major egg antigen (P12812)|Evalue: 2e-05	793	17856	52 (12)	75.3	166	6.4	SSNNQGSYGSSGHSGLSNYGSGRNDYGYQSSALSRYNDRTGSSAYGGNYGSSYNTGSSSDRQGQSGNDEGFFASIGNWMSNLIGLTDKHSTGGSGGKSIKPQIVEESGQKKVQYNFDVRGFSPENVNLTASGQRIEVTATQEDKDDDHHVRREYRRVITVPEGIKV	36.87	108.34
	A13, 12-14, 16, 18	16	EZ762962	contig26159:38:948:2|similar to Succinyl-CoA ligase [GDP-forming] subunit beta, mitochondrial (Q9Z2I8)|Evalue: 1e-80	788	34297	17 (12)	49.8	303	6.04	MAGRGLSIVQQWRHSMKVMSRTCAVMHKRDLSLQEYQSKQLMHDYGINIQRFEVVGAKEETSSAVQGLQRQCGNVREYVIKAQILAGGRGKGTFRENNFKGGVQLTKKQEQVQDFVSKMLGYRLVTKQTPEEGVLVQKVMVAEALDIAKETYLAFLMARQKDHEGPMVVYSPKGGMDIEQVSEESPNEIFTKNVDIAKGLSAQDALEIAKALQFEDQYLEEAKTQIMKLYNMFVKVDAVQVEINPFGQTPDGRIVCFDAKLSFDDNAQFRQQKIYAMGDTSESDPREVDASKHNLNYIGLDGN	2.32	4.68
	A11, 10, 14-16	31	EZ762553	contig24462:119:1723:2|similar to T-complex protein 1 subunit beta (P78371)|Evalue: 0.0	781	58563	13 (11)	28.3	534	5.88	MSALNPIQILSPEGTEERAENARLSSFVGAITIGDLVKTTLGPKGMDKILVFAGRKDEIQVTNDGATILKNVGVDNPAAKVLVDISQVQDSEVGDGTTSVAVFCSELLKEAEKLISQRLHPQTIIAGWRKATVAAQEALSKASRSNRDEDEKFREDLMNIARTTLSSKILNQYKDFFSKMAVDAVLRLRESANLEHIQIIKKTGGQLSDSFLDEGYLLMKHPGVNQPKRIENAKILIANTPMDTDKIKIFGSRVRVDSTAKVAELEAAEKQKMKDKVDKILKHGINVFINRQLIYNYPEQLFADANIMAIEHADFDGIERLAFVLGGEIVSTFDHPEKVKLGSCKLIEEVLIGDEKMLKFSGVAVGEACSIVLRGATQQIVDEAERSLHDALCVLQQTV…	0.93	2.32
	A11, 13, 17	30	EZ762783	contig25396:1:1593:1|similar to Dihydrolipoyl dehydrogenase, mitochondrial (P09622)|Evalue: 0.0	781	57748	20 (15)	32.3	530	8.2	TLRIPSLAAEFQNPFYLQQYTPLPSTSIATADMARVLRTYTSRSPLIRRSFCTKSSEEFDLVVIGSGPGGYVAAIKAAQLGLKTACVEKNETLGGTCLNVGCIPSKALLHNSHYFHMAQKDFKNRGIDLDGVRLNLDVMMQQKRDSVKSLTGGIAMLFKSNKVTPFVGHGRLASANEVLVVDPNDPNQVRQTIRTKNILIATGSEVTPFPGIDIDEETIVSSTGALSLKRVPQHLVVIGGGVIGLELGSVWKRLGAQVSIVEFLGHIGGMGIDMEIAKAFQKILVRQGLKMKLETKVLGARREQNGAITVGVESVKDSQKKEELQCDALLVSVGRRPYTANLGLKELGLELDKKGRIPVDKRFKTKIDNVYAIGDCIEGPMLAHKAEDEGIVCVEGIAG…	1.57	1.75
	A7, 5-19	24	EZ759328	contig02294:1:661:1|similar to Vitellogenin-4 (P18947)|Evalue: 5e-11	774	25352	59 (12)	73.2	220	4.85	GKDLMQIEKVFVGSIHERFVSEPMTLIPTAFVEPIPSSEAPFEEVLKKPIRFNYENGKVKEFETTEEDPSWSINMKRAILTTFHLSLNDKEESAFRQPYPTSNGQPLKKDQDNEYPQLFTVMEDGAAGRCEASYVVLQTPDSDEFVFPQIETVNAGRPIPIPRPTNAQVLNVTKSYNFKNCEYRPFYAYGMHLSGICPTCEDKPEEWSDLIEASAHTRYN	31.18	95.06
	A18, 16-18	5	EZ762429	contig24083:75:995:3|similar to Triosephosphate isomerase (B0BM40)|Evalue: 1e-90	771	34276	17 (10)	47.4	306	7.6	MCVYFSMHFPRKYWDRLPSGPLLSKHCHEQTSDSLCILTFGVFSAVPTKYVVXEPTRILSDTMAASRKFFVGGNWKLNCSKQQADDIIKFLSSNLNANTEVVVAPPTLYLEYVKSKLPQNVQASAQNCWKEASGAFTGEISPAMLKDVGISWVILGHSERRQIFKEDDQLIAEKVKHALSAGLNVIPCVGETLQEREGNQTETVVFRQMKAIADVISDWSKVVIAYEPVWAIGTGKTATPEQAQEVHEKLREYIKSNYKQDVRIIYGGSVSGKNAKELAAKPDIDGFLVGGASLKPEFVDIINARA	2.32	4.18
	A13, 14, 19	17	EZ760122	contig06986:298:1467:1|similar to Probable pyruvate dehydrogenase E1 component subunit alpha, mitochondrial (P52899)|Evalue: 7e-140	768	43876	18 (14)	39.1	389	8.3	MFQPQVLRQSLVRTVTQCRGVASEATVQVPQFKLHKLDTGPRTEVTITRDDALRFYTDMVRIRRLETAASNMYKEKTIRGFCHLYSGQEACAVGIEGAIRKDDAVITAYRAHGWTMTRGATITQVLAELTGRSAGVQRGKGGSMHMYLPNFYGGNGIVGAQIPLGAGIAFALKYKKTDNVCVTLYGDGAANQGQVFEAYNMAKLWNLPAIFVCENNGYGMGTSAERSSASTAYYTRGDYIPGIWVDAMDILAVREATLFAADLCRTGRGPIVMECATYRYHGHSMSDPGTSYRKRDEVDEVRKSRDPIMHFKDRILSCDLATDEELKKIEQEVVKEVAEAVQIAKNDKEIASEELYTDVYSNNDEWKFRGTTPFEWKTAPKRQQQRASN	1.76	1.92
	A12, 11-18	26	EZ760939	contig16244:1:1489:2|similar to Adenosylhomocysteinase (P10760)|Evalue: 0.0	765	55497	23 (12)	36	495	6.01	EIQIFLEKRSRDYEGSHIRLSYESSQFQSXIIAHPSQCSVVKSAVLNEAMATNHSILPDGSTQKPKYKVADISLAEWGRRELELAEHEMPGLMSIRRKYAPSKPLKGARVAGCLHMTIQTAVLIETLVELGAEVQWSSCNIFSTQDHAAAAIAKTGVPVYAWKGMSEEEYVWCIEQTLYFPNGEPLNMILDDGGDLTNLVHDKYPELLAGIRGISEETTTGVHNLHRRLRQGKLKVAAFNVNDSVTKSKFDNLYGCRESLVDGIKRATDVMLAGKVAVVAGYGDVGKGCAQSLRGFGCRVIVTEIDPINALQAAMEGYEVTTMEEAIGARGASIFVTTTGCNGIIRGEHMMNMPEDSIICNIGHFDVEIDVKWLNDNCKEKKTIKPQVDRYTLSNGRHL…	1.37	2.66
	A12, 4-14, 18	27	EZ758984	contig00465:111:1184:3|similar to Serum paraoxonase/arylesterase 1 (P27169)|Evalue: 2e-48	763	40230	31 (13)	44.8	357	6.06	MGLIIWSTILLGLSWWAFEAVKFGDYFKVMHNQTPGNCVVLKGIDHGSEDMDLLPSGVALITSGLTFRRENLLSHPGGIYSIDLNKNESEPTVTPVKLSGYKDKLNPHGMSVFTGADKKTYVYIIHHSFANENMTETVEKFSVDAKGTTLTYVKTFKDDSFQTLNDLTVVEEDKFYASNFFIFKNNFLQSFEQFSFLPLQNVIFYDGKNGSIALNWQRSSNGVNLSPDHKFLYVAEVFGKRITSYRINGWNDLKQVDRIFLGTMVDNINVDQDTGDLWLGTHPTGYQLFFAMLGKGYRAPSQVLRVKVNNGIFGETTQVYANNGNEISASSSALHYKNHVLVGSVSDKTVLCDCLTC	3.49	6.75
	A13, 12	18	EZ763101	contig26946:46:1329:1|similar to NADH dehydrogenase [ubiquinone] 1 alpha subcomplex subunit 9, mitochondrial (P34943)|Evalue: 1e-74	758	48831	16 (13)	52	427	9.14	MKGAKVLQLCRPLHPRTVSGEFGIVCGRRHQHSSGHNNEENSTDAGLTSQVLKPRDVRSSTLSGLARGTGGRSSFSGIVATIFGSSGFLGRYVINRLAKIGSQVVIAHRTDPYNIRHFKLMGDLGQVLYFPMDLRDEASIRRAVRYSNVVVNLLGSDFETKNFTFNDVHVDGARRIARISREMGVQKFVHMSALNATENPNEIFIPNGSGFYRSKKLGEKAVLEEFPEATIFRPSDMFGVEDRFLSFYAYWNRKLFKWMPLYENGLSTIKQPVYVNDVAKGIANCLFDSTAQGKIYEAVGPRRYILKDLVDYFFQVMRKTPALWGLSMMNMDPLTRMKTTISEYFQQSFKAHHWERLEREYTTDRRESGLLDLEDLGVDPLTILEDYTPYHLKSYRAYN…	1.5	1.64
	A9	33	EZ762018	contig22391:1:1506:1|similar to Acyl-CoA synthetase short-chain family member 3, mitochondrial (Q14DH7)|Evalue: 2e-146	758	56504	17 (11)	34.7	501	7.45	PQQRRMHLETRNTDTWYYDTYQKSIKEPESLGRYAQNIVWTKPFEQVLDHSNPPFTKWFVGGELNVCYNALDRHVEGGFGGQSAIIHDSFQTKTQSTMTYDELFDQVQRFAGALLEMGIKKGDRIVIYFPMIPEAIVAMLACARIGAVHSVVFGGFTPRELGIRINHSKASAVICGSIGLEREKILDYKKIVDVAVEQSPHKPKHVVVYQRPKLQKVQMHSKDLDWNHVIKGARKAECVPVAATDPLYILYTSGTTGKPKAIVRPGGGYAVALDFTMKYIFDAKPGEVWWGASDFGWVVGHTFIVYGPLINRNTTLVFEGKPTNAPDAGSFFRVIQDHKVQNLYTAPTTLRSIASEDPKNECGRKYDVSSLRYVFTAGEKCDESTKNWTKEVFGVPLLD…	1.21
	A12, 11	28	EZ761649	contig20065:1:1271:3|similar to Tubulin beta-1 chain (O17449)|Evalue: 0.0	754	47674	36 (13)	35.1	422	4.75	DEHGIDPTGAYKGDSDLQLERINVYYNEAGNGKYVPRAVLVDLEPGTMDAVRSGPFGQIFRPDNFIFGQNGAGNNWAKGHYTEGAELVDSVLDVVRKEAESCDCLQGFQLTHSLGGGTGSGMGTLLISKIREEYPDRIMNTFSVVPSPKVSDTVVEPYNATLSVHQLVENTDETFCIDNEALYDICFRTLKLTTPTYGDLNHLVSATMSGVTTCLRFPGQLNADLRKLAVNMVPFPRLHFFMPGFAPLTARNSQSYRNLSVPELTQQMFDSKNMMAACDPRHGRYLTVAAIFRGRMSMKEVDDQMLSVQNKNSSYFVEWIPNNVKTAVCDIPPRGLKMSGTFIGNTTAIQELFKRISEQFTAMFRRKAFLHWYTGEGMDEMEFTEAESNMNDLVSEYQQ…	2.57	3.66
	A7, 6-12	25	EZ761788	contig20808:1:1714:2|similar to Laminin subunit beta-1 (P02469)|Evalue: 2e-07	752	67595	14 (13)	33	570	5.09	QNLIHLLIVKQSETRTEWTQLRKTQTTDASVIAKRMIEDREKELRDEKDVNRSLAEQLKETKNLLLQERNRTKDVNDKLKSVNVKSNGYESELSAMRHKENQSNQRHQTELRQLTQRIQELENQRQSSLRTIEEENRKLTLQLSQQSNLRESLQSSQNAHDEIRKERDTLREAFRVEQIRIKEIETLVQAQNENVRDSDSLSTAELENLQKEITNLREERDSSQRNFRELQSKYDEFQSSNKQSDSKAKEYEERISELTYQLQNTERRIEKFDENDKKLQTLETQRQEALNECQTLLSQVTELESISKMYSAQQDELTKLRAKQEESEQSHQSELKQLNERIRELEDDRQSSEKTLEEENRKLNAQLDQQSNLRESLQTLQNERDEMRKELDTLRETFR…	0.77	1.12
	A7, 7-11, 15	27	EZ760587	contig10895:82:3300:1|similar to Lysosomal alpha-glucosidase (Q9MYM4)|Evalue: 0.0	752	122079	17 (15)	18.9	1072	4.84	MVAKGSYESDAEQLIAESLLHHRKRTFAALPRFVILVICIIFVFSAGLILFGPRNLSEFNRIYGQKSRGNDEDATSQLLSANDASQDYVRVRQFFSINVFSFQQSLKSTDDSFDTRNVDKEIXENRDALWTLFFGEKTVDLNDVEQKLENSIFSDLENEMFKAISDLTSNGESADTTGNQSIDENSLDKTATKDTDTASCPFEFPELLRFDCLPQGTITKETCLSRGCCWQESSSNGLAKGLNASAMGVPWCYYP	0.53	0.95
	A9	34	EZ760179	contig07386:1:1873:2|similar to Eukaryotic peptide chain release factor GTP-binding subunit ERF3A (P15170)|Evalue: 2e-158	749	69278	16 (14)	28.9	623	5.85	KSAMRLRVLEHLTFRFDSLSFCXIFVSKDGPIHLNGNVPDSWDEGGQETSGTDGNASIDQTSASFSKFNVNAAEFIPSFLRTTPAEETQSSVQELPKPAKKVSAPLVDTKKAVSVTEKSAAEKPAAEKKEATKISSMGQSEKPQMAVPSKSQEEEGEWDAEDEAETEEKAPLRPLKAKEESGPKKEHLSIVFCGHVDAGKSTIGGQLMYLTGAVDKRTMDKYEKDAKDAGRESWYLSWALDTNPEEREKGKTVEVGRAYFETESKFFTILDAPGHKSFVPNMISGAAQADIAALVISARKGEFETGFDRGGQTREHATLLKMTGVKNLIVLINKMDDPTVVWSETRYNECKDKLLPFLKNVGFNPKTDLTFMPISGYTGAGMKEPIDKTLCSWYEGPTF…	0.91
	A9, 9-12	35	EZ762192	contig23182:1:1368:1|similar to Cytosolic purine 5~-nucleotidase (Q6DKB0)|Evalue: 5e-137	746	52731	17 (15)	35.7	456	6.06	PHSSLDSSSQAQHLHTQFLRLSSVKIAENMDSAGLINTHNEHTTNASDASKDGDDVLHKYYRETEHRVFVNRSLKLGQIKFYGFDMDYTLAVYKSPAYEAMAFKEIIERLIEIGYPQEIRVFEYDPSFATRGVWFDNTYGNILKVDPNGYVMVAYHGFEVLKASEVEELYPNKFVILDERRMYVMNTLFNLPEVYLLACIIDYFSKMEDAVRQKTGLKRGDVFMSYKSIFQDVRTAVNWVHMQGRLKEKTVLDPETYVERDPRLPILLDRLRKNGAKVFLLTNSEFLYTEAIMTFMFTGIRYPGYDPSRNWKSFFDFIVVDAQKPLFFGEGTTLREVDTKTGILRLGATTGPLKAECVYNGGSCDVFTSLIGAKGKDVLYVGDHIFGDILKSKKTRGWR…	1.48	1.8
	A10, 11, 15, 17, 18	30	EZ761768	contig20686:1:1600:2|similar to T-complex protein 1 subunit theta (P42932)|Evalue: 0.0	741	57873	17 (15)	32.6	533	5.95	TAPGFASMLSEGSRYYSGTDETVLRNIEAVRQLTQIVRTSYGPRGLSKIVVTHLGKLLVTNDAATIIKELENNHPGVKLVIMASEMQEREIGDGTNFVLIFAGALLDEAEELIRMGIPVPEIVDGYELALSKALELLDGLVCAKVTNFRDMDQIKKALKPSIASKQYGNEDFLTNLIAEACASILPEKGLSFNVDNVRTCKILGSGLFASTVMRGMVFKRDIEGDVTKASDAKVAVYSCPVDSKQTETKGTVLIKNASELLNYSKSEEDMLEKQIKAIADSGARVVVSGGKVGDLALHYLNKYKLMTIRLTSKFDVRRVSKTVGAMVLGQLSAPTADDLGHCDSVYIDEIGDTSVVVFKQXKKESGSIATVILRGSTDNSLDDLERSVDDAVNNFKALT…	1.42	3.21
	A7, 6	28	EZ761172	contig17845:1:2472:1|similar to Neutral alpha-glucosidase C (Q8TET4)|Evalue: 0.0	741	94439	20 (14)	28.9	823	5.42	SLVDDLEFVSFEHKSAKIEVTINTHDNLQTVXHAKPLRIDFYDKGTLLVTLNSQSLFLIEPMRVKPGFVASDSSTTTTAEGEAQPAADNESKETEKQDNENVVPPPVDEVWEETFKGHTDSKPFGPNSVGLDIGFVGFENVYGIPEHADSLRLKSTKDAEPYRLYNLDVFEYELNNGMALYGAIPMMIAHNERNTVGVFWNNAAEMWIDVDYVSESTGGLLFNSDSKPIQTSTHWYAESGIIDLFVMMGPRPSDVLREYTSITGLPSLPPYSAIGYHQSRWNYNDEKDVHSVHQNFDEYDIPLDVLWLDIEYTDGKRYFTWDGSRFPNPAEMYKNLTAKGRQLVLISDPHIKRDDNYFMYKELRDKNLYIKNKDGSVYDGWCWPGSSSYPDFLDPTVRE…	0.85	0.96
	A13, 12, 18, 19	19	EZ762234	contig23341:69:1196:3|similar to Actin, alpha skeletal muscle (P68139)|Evalue: 0.0	740	42370	66 (15)	46.9	375	5.75	MNEDMTPVVIDNGSGMCKAGFASEDAPRAVFPSIVGRPRHQGIMVGMGQKDSYVGDEAQSKRGILTIKYPIEHGIVTNWDDMEKIWHHTFYNELRVAPEEHPVLLTEAPLNPKGNREKMIQIMFETFRVPAAYVSIQAVLSLYASGRTTGIVLDSGDGVTHTVPIYEGYSLPHAVRRLDLAGRDLTEYLMKILTERGISMSTTAEREIVRDIKEKHCYVAQDFEEEMRKSQKNSTFDVNYEMPDGQVITIGSERFRTPEVLFQPSFIGLESLGVHNTIYDSIMRCDVDIRKDLYSNIVLSGGTTMFSGIDTRMQKEISALAPNTIKVKVVAPNERKYSVWIGGSILASLATFQQMWISKQEYDEAGPSIVHRKCF	3.16	4.77
	A7, 2-12, 14-19	29	EZ759411	contig02754:347:1399:2|similar to Calcium-transporting ATPase sarcoplasmic/endoplasmic reticulum type (Q7PPA5)|Evalue: 1e-150	739	38779	20 (11)	38.6	350	5.1	MDTAYQKPVDDVVRYFDVDPENGLSDALVKEYQAKYGLNELPAEEAKPLWELILEQFDDLLVKILLLAAIISFVLALFEEHDDQITAFVEPFVILLILIANAVVGVWQERNAESAIEALKEYEPEMGKVVRQDKQGVQRIRANQIVPGDLVEISVGDKVPADIRLVKIYSTTLRIDQSILTGESVSVIKHTDPVPDERAVNQDKKNILFSGTNVAAGKARGIVIGTGLNTEIGKIRTSMAETEAEATPLQQKLDEFGEQLSKVISIICVAVWAINIGHFNDPVHGGSWLKGAIYYFKIAVALAVAAIPEGLPAVITTCLALGTRRMAKKECYRTIATFSRDTRLHISHLL	1.9	7.44
	A11, 10, 13-15, 17, 19, 20	35	EZ762928	contig25994:1:1190:1|No Annotation	738	45325	28 (14)	43.7	396	5.95	AMGRMGLGFWESMESENMKEYLKAIHGEKGAQLWPENSQIITGFRYFEDRDLFGHMIMLRPAGVTTNFNYRQGFNSSVLDADGIIDFIFEAESGEDSAVLHAKFKLRDSDKSWTNDYEFKEDGTLVVTGKAGDVTAKVTFRPILSRVAMGDWEATEEGENLDKWPEMFKGGPAPPTTEKFHLSIRRQKDKYVSITNSTVGYHEIAFKINESGSIAMPDGKPFEYKFGYDCALDRLSGTIKXMAGEEIKTRYDFEDRGVYGDYRKGDLHITRFFRRLIPQKFLGKYKFNGKQINTNAFLAALHPDHIENSKETAEDKQKHLPEKFEFKSDSYKYTEITYASNGTATAYPFKLGVVGHGQMSNGVKVDYRYAFYTSMPRTTIDAEFWTNEVPERHFSV	2.55	4.47
	A8, 9	35	EZ762332	contig23679:1:1328:3|similar to Threonyl-tRNA synthetase, cytoplasmic (P26639)|Evalue: 0.0	737	51672	17 (14)	39.5	441	6.32	SSAYWEGKADAENLQRIYGISFPDPKQLKEWQHFQEEASKRDHRKIGKEQELFFFHELSPGSCFFHPRGAHVYNTLIELIRSEYKQRGFQEVISPNVYNSKLWETSGHWQHYSENMFSFKCEDEIFALKPMNCPGHCLIFGHRPRSWRELPLRMADFGVLHRNELSGALTGLTRVRRFQQDDAHVFCTADDIKSEIAGALDFLNKIYTIFGFTFDLKLSTRPEKFLGDIDVWNKAEAELTQSLNDFGKPWSLNPGDGAFYGPKIDITITDALRRHHQCATIQLDFQLPLRFDLWYSSKEGDLKRPVIIHRAVLGSVERMIAILTENFGGKWPFWISPRQSTVIPVSKDFEDYALKVRQTIHDLGFICDYDYDHGDTFNKKIRTAQLDQYNFILVVGQKE…	1.69	1.89
	A8, 4, 7	36	EZ762203	contig23239:932:3391:2|similar to Protein transport protein sec23 (Q5BGR9)|Evalue: 0.0	736	92725	14 (12)	19.5	819	6.66	MATYNGYEADYASQMQQQQQQQSYASQQDYQQQQYSSQQQTTPPQAQQPQYNMMEVVREQERLDGARFTWNVWPCSRLEATRVVVPFGMFFMPLKSRSDLPPLMYEPVRCTRCTGVLNPYCQVDYRTKGWMCALCSQKNGFPPQYAAISEQQRPAELLPQFTTLEYILPRSHGMPPIFLFCVDTCLDEDDLQALKESIQASIGALPPNAHVGLITFGRVVQVHELGAEHIPRSFVFRGTKDLTAKQLQDLLGIGKFAGTPQQPQTVKGQPGQPAVTHPPNRFIQPVEKCEASLLSIVSEIQRDPWTVSPGKRSLRSTGVAMSIAVSLLEISFPNTGAAIMTFIGGPCTQGPGMVVADELKTPIRSHNDIVKDNAPFMKRAIKFYDTLAKRAATNCHALD…	0.52	0.79
	A11, 10, 18	36	EZ759771	contig04754:1:1443:1|similar to T-complex protein 1 subunit alpha A (P11984)|Evalue: 0.0	736	52323	15 (12)	32.2	481	6.47	LHFQNLDFCLFRPLFVNLVTQISVRKMSGASALLSLPGERTSGQNVRSQNVMAVSAIANIVKSSLGPVGLDKMLVDDIGDVTITNDGATILKLLEVEHPAAKILCELADLQDKEVGDGTTSVVIFAAELLKGAEELVKQKIHPTTIISGYLLACREAVKYIQEHLVIGVEDLGRETILNVARTSMSSKIIGPDSDFFGNMVVDAATAVRFSDGKGGYKVPIKAVNVLKAHGKSSRESILVPGYALNCVIASQQMPKKITNAKIACLDFGLMKAKMAFGVQVLVTDPSKLEDIRKREVDITKERIQKIINAGANVIISSGGIDDLNVKYFVESGAMGIRRCKSSDLKRIAKATGATFLMSLANLDGEESFDASFLGHAEEVIQERVCDEELILIKGTKAR…	1.21	1.9
	A11, 4, 5, 8-12, 18	37	EZ759924	contig05711:251:901:2|similar to Pyruvate kinase isozyme M1 (P11979)|Evalue: 7e-73	736	23916	19 (11)	70	217	5.05	MSGVICTIGPASRSVEVLQDMIAAGMNIARLNFSHGTHEYHAESIATVRKASANMPILQFPLVGIALDTKGPEFEXGLIEGNPNAELKLITGQSIKLTIDDAMKERCNLDQIWVDYKNIIQVIRPNSRIFIDDGLICLIAKELGDTWIGCVVENGGKLGSRKGVNLPGTPVDLPAVSERDYLDLRFGVEQKVDMIFASFIRDANGVLEIRKILGEEG	3.83	6.69
	A14, 13-16, 18, 19	19	EZ759004	contig00574:89:529:2|Late embryogenesis abundant protein [Alteromonas macleodii ATCC 27126] (ZP_04714463.1)|Evalue: 4e-05	733	15521	23 (14)	61.9	147	5.5	MRSLSVVAIVCLIQLSQCWIWSKPEPTAAEKAAAAVKDGLHRAADSMENLKDAAAEGMEAGWEVTKDASGKAYKVASASMENLKDAAGEGFEATKKVAGVAADATKKVAGQAYDATSEKIGEAIDLASKKLKEAHESETVKMMEAKA	12.04	15.19
	A19, 18-20	3	EZ760334	contig08542:152:670:2|similar to Probable myosin regulatory light chain (Q09510)|Evalue: 4e-50	730	18848	26 (11)	76.2	172	4.96	MSKGEKTKKRAQRATSNVFAMFEQSQIQEFKEAFTMMDQNRDGFIDKDDLKDTFASLGRAPSDKEIDEMLGEASGPINFTMFITLFGDKVAGVDPEATITNAFKLFDKEGTGKLEEGHLRDLLGGVGDKLSADEMSQAFKGAPIFKGQLDYVAFAKLMTRGPEDEAGAAPKK	10.76	11.87
	A7, 4-19	31	EZ762594	contig24586:1:771:2|similar to Vitellogenin-6 (P18948)|Evalue: 5e-10	725	29873	60 (12)	55.5	256	5.36	EQKKIEGSLLVDTLSMLPMRLRKIDPTMIEKLYTLCNSMFKGPQELHFAERSCWLAYGTIVHKACAHKHFNPQQWNEVKDTTSNTENKPMKSRKLAXXEKEQASTAEPQTSQEEEQYDNPWCPQXNQDEIVERSNSAWKQMNTEELKIGWLKSIKNMGLPEFIPQLEEIIKDETLPTYIRTQAIYALVQMIDLAEQEVYQILLPIFHTTTIPYQLRIAAYTVMIHGQPPIDILQSIAQKINQEPILEVASYVYSSM	20.4	55.07
	A7, 4, 6-18	33	EZ759418	contig02794:61:444:1|similar to Paramyosin (Q86RN8)|Evalue: 3e-32	721	14492	20 (9)	56.2	128	4.82	MSDIFGGGSRFVTSTKGTSAADIGVLSRLEDKIRLLQEDLETERELRSKIERERSDLAVQLVQLSDRLEEAEGAQETQXELNRKRDAELGKVRKLLEDVHVESEESMGGLRKKHQEALNELQDQVDQV	9.11	25.71
	A13, 4-20	20	EZ760287	contig08235:1:820:2|No Annotation	719	30752	23 (10)	45.6	272	8.66	TGPRSARSRFSDTGLFSEGQTVHGEANLDLDSENSFTPSLYLNPHSATKMAEVSRHRVRKVYEAAKHHGIRAFTEAKNAWSNDDHQIYSYLKPYYSGSAADFVQDRVSQASRFYQNQMNCDMNCERDESDFENDSSSSGRESTGQCPPIGSSHNSNSQRRSQQPCASDDECTGRNNKCCATANGRQCVPVSPNRSATTSASRSVFGSNNGRSQSCALKSVYCNKSIAGFSVQQLFEILKVQVKRLVREVNAYVKDTPAAEWIAFSTRLRRDS	3.67	15.66
	A12, 13	30	EZ759613	contig03799:257:1534:2|similar to Mannose-6-phosphate isomerase (Q3SZI0)|Evalue: 2e-86	718	47677	17 (14)	39.1	425	5.3	MSRHNEVRASRLICAVQSYEWGKVGPSSQVYQLAEQGASDEKMDASKPYAELWMGTHPKGPCYVLMPDNRGHLLQDFLSKKPFLLGDALVSKFGSDLPFLLKVLSVNKALSIQMHPTKEEAAELHKRDPKNYPDSNHKPEMAIALTPFEALIGFRPLHEILTFIRSIPELRAAMGEENAVIAENGIIKPLQDDQQNALKYAFTCLMEADPSVVKVEAEKLARHFKNQVTDIHKFGPLSQNMGLVFLQLYADFPGDVGCFCVFFMNHVTLEKGQALFLGPNVLHAYLKGDIVECMANSDNVVRAGLTPKFRDVETLRQLADYTCGPGEDMKFPSTRDTDDVWTSYYLPPVSDFGVSLTEIPEVNAVYTLPELGSASIVICLNGAAKCSIADDQIEKGTVW…	1.91	2.22
	A15, 12-19	18	EZ761416	contig18941:155:934:2|No Annotation	717	27813	57 (11)	56	259	5.83	MNPTSEHISETTTTVKTTDTGVGLQNVSASHHASGIHHDSSAASSTESTKFVHTETKVPMATPAPPIISAATGIADSIVSEGMTASAARISAGANESIVPVVDTQKAAADYDKYQREAAAIAAAHERDVAKKTEAYRKETEEQAEKIRKELEKQHAKDIEFRKDLVEDAITRQKREIELEAKMAKKELEREAEAALAALDKSKLSTDIAVSINTAAGSTVAGGTVTTVTEKTESTHSHEHEHEHRSLGEKIKDTLLGRK	6.64	11.41
	A19, 17-22	4	EZ761920	contig21746:1:589:2|similar to Glutathione S-transferase 1 (P46436)|Evalue: 6e-32	716	22033	42 (11)	60	195	5.33	ARAELIRLIFHGTGEDFEDVRLDTGSWPQMKPNTPFGSLPILEFDGNQLAQSLAIARFLAREFGIAGKSRTEEALADSVVDATNDILGDLIRIIFDENDKSKGENRRKFTEATFPASLRSFEQFFEKYGRNGYVVGNSLTWADIAIFNAVDQVVQAGIVGWDYFDKYANVKGLLRKIEETPRFQGYLKTRPHTPY	11.89	19.22
	A7, 4-17	34	EZ762516	contig24360:1:563:3|No Annotation	711	21499	37 (10)	55.1	187	5	SGDAKKFMIESAITEAIYKVTPQHHAAGSIVAYVNMTLTLLSADVQSKAIEFPEQNANLIEGLHMINPEFVEKKDENTYLYETPEAKQPIVQKKQFFPYVDEKPAMIKQIFEKFLKDLENPTEDSADATLLINEMVHYLKFADKKELQQIHEQIKSINVPKIEKEEIEHMFLDILLSTGSNCTFTYI	19.93	60
	A11, 5, 7, 9-25	39	EZ759786	contig04802:115:695:1|No Annotation	709	21955	86 (14)	73.1	193	6.23	MGLGVWESTSEQENMLEYLKALHGNDKAASLYEKNSKVLTGWSYNDHTDYFVHWVRFLPSNVSASFGYRGDKPGLAAFGDNIIEYSFTADSEGETGVLHGKFKIRGTDKSWTKDYEFKEDGNMQMTAKFNDVTAKILFRPTLSARAQGLWEATTEGKNLEKLTEIFKGGPAWPKDEKFRVCIKREGDHYVKTV	39.13	49.23
	A5, 4-6, 9, 11, 17	17	EZ759024	contig00682:96:1232:3|No Annotation	708	41635	14 (13)	51.6	378	4.92	MEAAAVRSGSIHSGFDTILPSMRSRSGSVKSIGSIGGAKVVATAPVPIAGDTVEDNWWKTSFAWPDESPTDTSAEESGSEDTGETGYGSDDDDTEGSVWGEDDLRSLGTSTDVYSPFTWNTFSAKYGNVVAKDMTASVMNILLRSIQTYAMVSSGHVLAKIRLGKLSLRESDDVMLSEIQSLPTQEVSLEPVFQAEHLDSVLMRFELGPAQAVPTPDRFALCLTARNIHMEMQSKTFKRMQALLQSAMKVEIPQSSSLPPMPEVIHSSTAPLVPPLIDARISNILFKIKNDPETLAAHPNILGKDLTFKLGEFVVRCDENGLFEIKSLNEHDEPDRVEDVESSSPLFIKHRLSQLAEQKKRIEEKMRRLMESMPSSNI	1.92	2.59
	A10, 9-11, 15	33	EZ759969	contig05967:88:688:1|similar to Putative aminopeptidase W07G4.4 (Q27245)|Evalue: 9e-13	708	22292	25 (10)	64	200	5.26	MVSELKSRMSALKLNSSFLTTKVEYSSRLSNFDGFDCLVIVADQTVKDTRVLKEFGHINEALEITRKLDANAEKVATVTHTETFKRVVFAPTGPINRDTDDVRRYEEAAYEXGQESDVAGAKAPFVYVDVPEEIRANPLYMNADLVATLGALRAVYVPLEVREAKAERASKVERLGFFYPNEQRSAEAGNLATILEAGRI	7.16	8.95
	A12, 13, 15-17	32	EZ761444	contig19095:1:1026:1|similar to Serpin B5 (Q6GLQ1)|Evalue: 3e-18	705	39422	15 (12)	51.3	341	5.94	KTKDQIERLFGFKELLQSDSTSLERIFADYRKTVDSGSRHSRNRPYDLYSMSRVAVPRNVTVVRSFDGQSEEQSSLHLSHSEVNRHVSELTNGNIEELVRDASSEPTLVSATHFFSKWESSFKSTLACTMEAFHNADGRTVSVPTLHIESRLFCTHDDDLKATILEIPMEQHEMNIQIVLPDDPKNGLRFFEENLKHDTFEILRKNWRMPLTRVYLPKFQLKNNLSLAKHLQSLGLTDLFSENSLSGITSKAKLGDVIHGASINLSDRVGNPVPAEPRADRPGECRVMEPPSYPMGLHIDRPFLFNIKMRWPEVWYLMGHIENLESKENRKEYDYEHDTES	1.85	2.26
	A9,10	36	EZ761443	contig19083:167:1503:2|similar to Low-density lipoprotein receptor (P35951)|Evalue: 7e-05	705	51426	21 (13)	30.3	445	5.32	MLLNVFLLCFTFVVVTVEGQGRRSTPPPPKNINLAKDPRLKLNSQYRCVVRDDSYRDPDRKKDTAADLIATCNDMFRCVNGIVYKTVCAPGTYFNVIRQSCEVETGKTIKQCNYDTADDFKPATTPMPQVNLTCQQPNQLACASGICIPADRFCDNVNNCGDWSDELLCAPDTDPLAAPLCDPSRCKLPDCYCTADQVPGGIALEDVPQMIVLQFEEAINTNNIPVYNDLLFNANRTNPNGCGLKATFFLTHAYTDYRATKKLFLSGNEIALMGVDNERDEQWWTHAPIDRLEKEYTTERQIVSKFGEFPDDRLAGIRVPFFKSSGNPQFQMMLMNSFRYDSSIAVEPRANPIWPYTLDHKIPHLCYPPKTAQCPTRAYAGVWEVPLNSMINMFQDSCP…	1.54	1.67
	A16, 14-19	12	EZ761785	contig20801:92:886:2|similar to 40S ribosomal protein S3a (Q642T2)|Evalue: 3e-94	705	29991	32 (13)	51.1	264	9.98	MAVGKNKRLAKGGKKGGKKKTVDPFSRKDWYDVRAPVMFNNRSFGKTIVNRTQGTRIASEGLKGRVFELAQADLHKDDVGFRKFRLISEDVSGKNVLTNFHGMILTTDKIRSMVKKWQTLIEAHMDVKTTDGYLIRVFVIAFTRRRNNTMRKTAYAQHSQIKEIRRRMTNIVTREVSSCDLKEVVNKLLPDSIAKDIEKACQGVYPLHDVYVRKVKVLKKPKFELGKLLELHGEGGKGAVVATDAEGVPLERPDNYEPPVLEAV	7.21	14.21
	A16, 16-19	13	EZ759284	contig02105:90:857:3|similar to Glutamate--cysteine ligase regulatory subunit (P48508)|Evalue: 9e-40	702	28503	17 (11)	56.5	255	5.33	MNQDEIVISTGNILSSEHLRKRVNIGPQEELIDSLKESLRMSVSQLQHLPSGGSRIECGTFSQETGEPLSEEERNDLKITAKVYLLHSSADAVKSAINEGLKLLNTKSIDLVLVAFPSNDFKDFDDSWKGLEESVKAGTASVIGVSDFDASELERLYSAANIKPTVNQVNLESCCVIPPELSDFSKAHHIQLLTHNDPRHLLTPEIATEILDTTRDSVDLSSWEADWLLKYSVMVKSRGVVKSRGYLLSIRKSRR	2.76	4.7
	A17, 16-18	7	EZ762947	contig26098:1:627:1|similar to Glutathione S-transferase omega-1 (P78417)|Evalue: 6e-39	702	24260	23 (13)	68.9	209	8.58	PKTDNQHLTLYSMRFCPYADRARLTLNVKGIPHDIVNIDLAKKPEWYLKKNPAGKVPTLEEPNNRLIYESLIVAEYLDDTHKGKRKLLPTDPYERAQQKMLIEVLAGKITSAFYGLVLKKENRDEGVQNLHKAIDEVEKMLTNDFFAGKELGFVDLMIFPWISRFTAMKEVFALDWNETRYPKLTSWAKRLMAIPEIKESMQSDETVKG	7.94	9.78
	A6, 5-11, 14, 15	17	EZ762749	contig25250:1:832:2|similar to Nidogen-1 (P10493)|Evalue: 6e-46	701	30984	20 (10)	51.4	276	5.24	PIPPIPYPYPDQGPTQPPYQPPYQQPPSGSCYDNPMMCDRNAACKRSDRGQFHCECLNGFEGDGITCRMRPQSRGGFLAFTQGMSVMKIPLDHNSLDRGSQVAILPGQTAVGIATDCVDSYIYWSDIAGHNINRARYDGSENEIVLRKVQSAEGLSIDFISRNIFWTDSASDHIAVAKLADMKIGHHKVIIDKNLYNPRAIVAHPGKGTIFWSDWNREAPKIETSSMDGSDRKVLINTNLGLPNALSIDFTTDDLCWADAGVQRVECATVDGQNEE	3.17	5.42
	A12, 11-19	33	EZ761710	contig20348:117:860:3|similar to Elongation factor 1-gamma (Q90YC0)|Evalue: 6e-39	701	27237	22 (10)	65.3	248	8.39	MVAGTLYTYPGNFRAAKALIAANFAKADVKIVSDAPDFTYGETNTTDAFRQKFSTSKVPAFESADGKVHLTDDNAIAYYLANDQLRGSSKEEIASIMQWTGYSDTEILPAAVVLSLHALGSPEKLQLTSSRTHLKDALTVLNLHLSKQKFMVGDRVTLADVSNACNLMFAFTHAIDDRQSYPNVAKWFETLKNMAEFKDVLGPMSTDFEGQLKKGSEGKEGGAKKDKKKEGSKDEKSKEAKPEKPKKA	3.5	5.51
	A12, 13	34	EZ762488	contig24259:1:1301:3|similar to Hexokinase type 2 (Q9NFT7)|Evalue: 9e-113	700	47576	13 (12)	36.8	432	6.2	LSDADLRRIMDAFLTEMKRGLARATNPEATVKMLPTYVRAIPSGSEEGKFLALDLGGTNFRVLLINIESGRVRMSSKIFNVPHEVMVGTGEKLFDHIAECIYRFMNAEGILDEILPLGFTFSFPCRQMGLASAKLIKWTKGFKSAGVEGEDVAELLRSAIARRGDYKVNIVAVVNDTTGTMMSCAHSNPNCRIGLIIGTGLNACYMEKLENVELWNGDSDPPREVIINMECGAFGDNGVLEFMRTEFDKIVDEESPNKGAQLFEKMISGMYLGEIARLVLVKLGDAGLLFGGAPAPSVLLRKDAFYTKYITEIESDKEGSHSKCMKILKDELGITHATTEDATIVRQVCAAVSSRGAALAASGVTAIINHMNRPICTVGVDGSVYKYHPKFHNLMTECI…	1.39	1.7
	A18, 19	6	EZ763251	contig27864:1:775:2|similar to Sarcoplasmic calcium-binding protein, beta chain (P02635)|Evalue: 5e-12	699	30544	20 (13)	51	257	5.44	HTLLTTVNERIYPFTLRFIAFLEKFIXELLTLQQYDCEKASVLMVNSTMSETDKFFRHKHLFIFLKQWDIDCDGVLSAEDFDLLAQKFAIYQRHGKFEKDVVDRWRGVVGGWWTNFTGAADSNQDKSITFDEWLGFFDNLSKTTQTHNDLPEFLKMYLKISFTYIDFNKDGLFDIRDYRMFLAASNGDLRRADGAFDTMLTEPEKKKGTLTSERYYELMYDFWTSKNPQSGGRYICGIYDYLPIDKLEHYLELLTKK	3.25	4.54
	A10, 11	35	EZ761510	contig19357:147:1667:3|similar to Probable ATP-dependent RNA helicase DDX6 (Q0IHV9)|Evalue: 0.0	696	57334	14 (13)	35	506	8.99	MSVVGMQSEEWRMALKAPPKDRRVKTEDVTATKGIEFEQFGLKRELLMGIYEMGWESPSPIQEEAIPLALEGRDIMARAKNGTGKTGAYMIPLLNRIDPTKDVIQGLIIVPTRELALQTSSTCMSVGKHLNLKVMVSTGGTNLKDDIMRLQGTVHVMIASPGRILDLMDKQVARMDSCRTVVLDEADKLLSQDFEGLLDRILSHMPNERQILLFSATFPVSVSTFRSRYLKDPRSINLMTELTLKGITQFYAYVQEKQKVHCLNTLFSKLQINQSIIFCNSSQRVELLAKKITELGYSCYYIHSKMQQHHRNRIFHDFRAGVCRNLVCTDLFTRGIDIQAVNVVINFDFPRMAETYLHRIGRSGRYGHLGIAINLITYEDRENLHRIETELNTEIKAIP…	1.18	1.58
	A14, 4, 5, 13-17, 20	20	EZ762848	contig25667:167:1171:2|similar to Transaldolase (Q9EQS0)|Evalue: 5e-125	695	37263	15 (13)	47.9	334	6.06	MAADNKTENEGMSSLEQLRQYTTVVCDTGDFGTMAKYRPTDATTNPSLVLAASGMSAHNSLIEKAVEEARTKHSDVQKQVEYAFDAVFIAFGVEILKLIPGRVSTEVDARLSFDRDAQIEKALHIIKLYAEAGVSKERVLIKLSSTWEGIQAAKVLEEKHDVHCNLTLLFSMSQAVACAEAKVTLISPFVGRILDWHVAHGDKKTFEPTEDPGVKSVEEIYKYYKKFGYKTVVMGASFRNVGEVTALAGCDLLTISPKLLEELANSTAKVEKRLDANAAKSEKIERIAMDEKTFRWMLNEDEMATDKLSDGIRKFAADAIKLEGLLRKKLEAKK	2.02	2.95
	A12, 13	35	EZ762544	contig24424:125:1390:2|similar to 26S protease regulatory subunit 6B (P43686)|Evalue: 0.0	693	48009	15	46.1	421	5.06	MEELNIVLPDEDAFVKAEELHETYVPNQFPSLDDLHRLDADDLYVRYKKLQQQLDFLQVQEEYIKDEQRNLKNEYRHAQDEVKRIQSVPLVIGQFLEAVDQHTGIVGSTTGSNYYVRILSTLDREQLKPSASVALHKHSNALVDILPPEADSSINMLRPDEKPEVSYADIGGLDQQKQEVREAVELPLTHFELYQQIGIDPPRGVLLYGPPGCGKTMLAKAVAHHTTASFIRVVGSEFVQKYLGEGPRMVRDVFRLAKENSPAIIFIDEIDAIATKRFDAQTGADREVQRILLELLNQMDGFDQTTNVKVIMATNRADTLDPALLRPGRLDRKIEFPLPDRRQKRLVLGTITGKMNLADEVDLEDYVSRPDKISGADLNAICQEAGMNALRENRYIVLA…	1.53	1.6
	A15, 13-16	19	EZ760376	contig08973:1:867:2|similar to Dehydrogenase/reductase SDR family member 1 (Q99L04)|Evalue: 7e-80	693	31137	16 (11)	54.2	288	8.22	FASKMSLTGKVAIVTGASRGIGKGIALQLGEAGATVYITGRTVRASGSAAGPGSLDETAEEVTSRGGKCVPVACDHSKEEDINALFDRVEREQGKLDILVNNAFSGVHAIMDVKGKPFWKMPANLWDDVNNVGLRNHYFCAVRAAQMMTEKSKGLIINISSYGGKIYLFTPAYGVGKAGKDRMAHDCAIELKKYNVAFVSLWPGPVKTEIISERILKPAEEREQSGKDAGSNARKAMNEMFLAGETTEFSGKCVVGLANDPNIMQKSGKILTTGDLATEYNLTDIDGR	2.73	5.43
	A8, 9	39	EZ762960	contig26156:52:2316:1|similar to Prolyl endopeptidase (P23687)|Evalue: 0.0	693	86445	17 (13)	21.4	754	6.17	MTLGFVSRRLASATFRSCKRTLQSHKRQFVRVASTMAAAHSQFDYPKTRRDESIEDDFHGQKNXKTHIGIWRDPDSAETKEFVSAQNVVTNSFLSSYPYYEQVKRLVTELHDFERFGCPSIEGPYVYYHHNSGLQNQSVMYQTNSVNEKTGEVFFDPNLLSKDGTIALSSTDFTEDGTLMAYMLSDGGSDWRTINVMDTKTKEKLPDLLTRVKFSGLSWTIDNKGFFYNMYPDMDEKSAHGVTNLTDQNQKVYYHYLGTPQESDVLVAEFPEHPEWKGTVSVTDDGRFAVMSISRSCEHANAVWYCDLSKLESRQIKGQLNWIKLFENFDAEYDVITNEDTKFYIKTNLDAPNHRIIVVDIDNPSQSAWNVLVAEDEKYNLEWVTIANRDKLILHYIED…	0.62	0.7
	A10, 11	37	EZ760057	contig06554:181:1740:1|similar to Asparaginyl-tRNA synthetase, cytoplasmic (Q4R4Z1)|Evalue: 0.0	690	59985	15 (10)	27.7	519	6.11	MSALDSSADAQTKNANAQTSDDQKRSSKSSEKKERKAAEIAAKERERHSKMEERAREDQAKREKNIEEAKSITITEDSSLPAAKLVKIRDTKANRDVRIKVFGWVHRLRRQGKNLMFLVLRDGTGFLQTVLNDQLCHTYDALTLSTEAAVCLYGIVKALPEGKTAPDGHEMQVDYWTLVGASPAGGIDNLLNEESGVDVQLDNRHMLIRGENMSKVMMARSVLIKAFRDHYYERGYFEVTPPTLTQTQVEGGSTLFKLDYFGEPAYLTQSSQLYLETALPAMGDVFCIAQSYRAEQSRTRRHLAEYTHIEAECPFITYEDLLNRLEDLIVDVAERVTKSPFAHLVYDLNPNFQVPKKPFKRMAYTDAIEYLKTHDIRKDDGTFYEFGDDIPEAPERKMT…	1	1.11
	A16, 4, 5, 15	14	EZ759808	contig04930:197:1183:2|similar to Estradiol 17-beta-dehydrogenase 12-B (Q8AVY8)|Evalue: 3e-66	684	36690	15 (12)	47.6	328	9.11	MADDQTTTYVEQIFGRSADVFAFLGLAVILWFVAKNSYFVYKNLFVFFFAEKFGLTANFRKLGQWAVVTGATDGIGKGYAFELARRGCDIILISRNPEKLRTVADEIESKYRVQTKTIPVDFGSDEDIYDVIRSSIEGLEIGTLVNNVGAGYKYPEYFADVAGGEETFLNLIRLNIVSQTMMTRIILPQMVARHKGAVISLSSGFATKPYPLVSVYSAAKAYSDYLSCALSAEYADEGIIFQSVLPFVVATNMSGFRKSNLFIADPFKYARSSLNTVGFFQRTHGHPSHAIQSWVLESIPQFWAKSLTLNMMQTIRAKALRKAKAKTQ	1.82	2.29
	A12, 11-13	38	EZ759766	contig04720:115:1504:1|similar to Elongation factor Tu, mitochondrial (P49411)|Evalue: 8e-148	683	51465	15 (12)	33.3	463	7.61	MLSFRYIVVGTRRLSSVASKEGAVQKWSTALGLHNQGFCCANRCYTTSSTLLQSSGEKKVFSREKPHCNVGTIGHVDHGKTTLTAAITKVLSEENHAKFTKYEEIDNAPEEKERGIXINAAHIEYQTDKRHYGHTDCPGHADYIKNMITGTAQMDGAILVVAATDGVMPQTREHLILAKQIGLEKIVIFLNKVDVADKEMVELVEMEVRELMNELGYKGDEAPMIPGSALHALQGTEPTMGKDAIKKLLDAIDTYVPIPARDLEKAFFLPIEHTYSIPGRGTVVTGRLERGVIKKGDNAEILGYGKVAKTVVTGVEMFRQILDRAEAGDQVGALVRGLKRDDVRRGMALVKPGTFGQFDNIEAQVYVLTKEEGGRAKPLTPAFKPQMYCKTWDCACEIV…	1.1	1.84
	A11, 10, 14, 15	42	EZ761712	contig20357:221:1750:2|similar to Inosine-5~-monophosphate dehydrogenase 2 (Q3SWY3)|Evalue: 0.0	680	55462	14 (11)	31.4	509	8.3	MGDAKLEKCGLSLEEMFAKGDGLTYNDFILLPGYIDFQAEVVQTKSKLTKRIELNAPLVSSPMDTVTESEMAIAMALNGGIGIIHHNCTAEYQCQEVYKVKRWQQGFVINPFCLSPEDTVQKVADIKKERGFSGIPVTVDGGLNSELVGIVTSRDADFIPEAEYATTKLKDIMTKKEDGLITAPAGITLKEAQEKLRKSRKGKLPIVNEIGQLVSLMARTDLKKRGDYPVATLDDSGQLRVGATISTREADKERLKELVKNGVDVVVIDSSQGNSIYQIDMLKWIKKTYPDLQVIAGNVVTQAQARNLIEAGADALRCGMGSGSICITQEVMAVGRAQGTAVYNVSKYAAQFGVPVIADGGISAIGHIIKALSLGASAVMMGGLLAGTAETPGEYFFHD…	1	2.18
	A8, 9	40	EZ760680	contig11701:1:1448:1|similar to NADH-ubiquinone oxidoreductase 75 kDa subunit, mitochondrial (P15690)|Evalue: 9e-169	678	53426	12 (11)	36.1	482	5.64	TYVEKLLASELSGNVIDLCPVGALTSKPYAFTARPWELRRYESIDVMDALGSNIVVNFRAGTNGGEIMRILPRVHDGINEEWISDKTRFSYDAXXRRQRLVLPMIKNSEGLLEETDWETALMTVGQRMSKTRGEEMAALVGGFAAAEELTALKDLMNRIGCETLCTEESFPMDASATDLRSSYLLNSKITGVEEADLVIFVGCNPRFEASVLNARVRKCYLHNNLRIALLGHPVDLTYDYDHIGVGLNDLEALANGQHKYQEILEKAKKPMVIVGSTALQSENGAQILASAMLLSTKLRSKVEGDSWRVLNVLHRVANQVAALDIGYKAGVAEIKQLKPKLLYLLNADEGFITRDDLSPNATVIYEGHHGDRGAQMADIVLPGAAYTEKCGTYVNTEGR…	0.93	1.36
	A9, 9-11	39	EZ759519	contig03342:1:1530:1|similar to Protein F37C4.5 (O44400)|Evalue: 8e-44	676	57955	13	30.5	509	5.24	ADSVRVEGRGSAVISEVTVTERSITEEEKNNPERTEKLKQRLEQLRLAEADLEAKINRTAMRRKVWEQYAHSVSHISEDGKVKTTASADSQSVDDLLKFLEKYDEECSRLDVMTREDKIEMEKLKEQIRATEENMSPYYGGDRRTKDVNILLDVRKAGEVVLDVTYLTYGVTWSPKYDIKVNATEKQLQIVYFGLIRQSTEEDWVDVVLSLATASPSVGGQIPTLGTKELSFKKPVETMKRKQAMIRPAALAVGARFMSSDATDIMTDAMPVEEMMEMQIECMEYSSAQVRESSFTMCFDISSRSTIPSDDAEHRVVIGVIDLEPTLQYKCIPEKIEKVFLEAKSVNKSTFAFLPGPSSIFLDGNFVAKGSLKAVNPSETFEVSLGVDPAIRVLRRPVK…	0.94	1.47
	A14, 12-14, 16, 17	21	EZ762554	contig24463:296:1435:2|similar to Glucose and ribitol dehydrogenase (Q5KTS5)|Evalue: 1e-80	674	41808	23 (10)	34	379	8.49	MRVVRRLFCVLSAKQFPSLTTPSPLNFTAHNLHTSRISTAVKMEKATEMVKNVLGMAEHKEAEGMEERSKTGQQQSEQPGKEHKMDVKPVAFNPLYKPGGKLRGKTALITGGDSGIGRSIAIHFALEGANVAIACLPEEIKDAEETKRLCEANVETLVREMIKVNPESEKEFLEEMKTVQKAGNPRFTIVTGDIGSSAVCKQIVEQTIKALGPINILVNNAGRQVYQEKLEDITDEQLKETYDTNIFSMFYLSKLCLPQMKKGDTIINCTSVTAYAGNENLIDYSSTKGAIVAFTRSLALNLAEKGIRVNGVAPGPILTPLIPATFPSKKVKEHGKNTPLGRQGEPCEVAPCFVFLASFDSNYITGQVLHPNGGRIVNG	1.9	3.82
	A13, 13-17	24	EZ762785	contig25399:201:803:3|similar to Actin-10 (Q54GX7)|Evalue: 2e-108	674	22746	27 (13)	62	200	5.2	MRLDLAGRDLTDYMMKILTERGYAFTTTAEREIVRDIKEKLAYVALDFDAEMDTAASSSTLEKSYELPDGQVITVGNERFRCPEALFQPSFLGRESAGIHECTYNSIMKCDIDIRKDLYGNIVLSGGTTMFPGIADRMQKELVNLAPSTMKVKIIAPPERKYSVWIGGSILSSLSTFQQMWISKEEYDEGGPSIVHRKCF	3.53	6.49
	A6, 4-9	19	EZ761419	contig18962:1:2389:2|similar to Coatomer subunit alpha (P53621)|Evalue: 0.0	673	90799	12	20.1	795	6.15	CFRSFESIVIKNLKNEXGGKKIQLSNCDEIYYAGTGVLLYRDGDYVIMYDLQQKAALASARVPKVKYVIWSNDMAFVALLSKHSVTLCNRNLETLSTIQESVNVKSGAWDENNIFIYTTSNHIKYSIANGDFGIIRTLDFTIYITRIKGSNVYCLDRECNPRVLSIDPTEYRFKLAVCQRRYDEVLHMVKHAKLIGQSIIAYLQLKGYPEIALHFVKDDKTRFALALECGNIDIALEAARTIDEKLCWEKLAEAALLQGNHQVVEMAYQRTKNFDRLSFLYLITGNLDKLRKMMKIAEIRKDMSAHFRDSLFLGDVSEQIKILEQSGHTTMAYMTSQRYGLEDSSERYDHTWTKIHSXTGGVRRPGRGSTAQPLRVMDENWPLLTVSKSFFEGAVSAKQ…	0.53	1.72
	A6, 7, 10	20	EZ759129	contig01245:1:1384:2|similar to Cullin-associated NEDD8-dissociated protein 1 (Q6ZQ38)|Evalue: 8e-105	670	52517	15 (13)	30.7	460	6	FSNTQRQGFIVTAKCVAALAMDSQQYHKVIETFIANIMNPNSTENIRMLGLATIGEIGYHIDLSNQNNLKTAFDYVYEAGKDDAKTFAAMAMGKLCGGNIDKFVPYILHELESQPQRQYVLLNAVKELILLVNSERIPWQGLASYVEAIWQALMKRTDCIEEGYRNILGECLGRLTALDVPKFLPQLIHTVQTTRLAQVRCGMITAVKYTIMDEVRPIDQYLKEQIGIFLEYLNDSDLNVRRTALTLFNSVAHNKSXVLLKDKLNVLLPLVYKETVVKPELIREVEMGPFKHEVDDGLDTRKAAYECLYTLLDSCLEHVNIVEFMEHVIRGLNDHYDIKTLCFLFVRRLVHAAPNAVAQKLESFTQEITKVLQSKVKANAVKQEHEKTDELKRAALRAF…	1.49	1.61
	A19, 17-21	6	EZ761390	contig18848:1219:1956:1|similar to Myophilin (Q24799)|Evalue: 5e-44	668	27202	25 (10)	55.9	245	8.37	MGGAPGVMAGGSTVFSLVLSEVGYNLVQESSVKXQGEYVFHSFWSFDXFLSIPKITTAKAMSNHGPTYGMSAAVARKLQGKRDPDQEAAVMQWMYSIMGERPPGGAFEDILRDGQVLCRFANKIQPGLCPRINSGPGQFKLMENIAAFQNACKQIGVRETDVFQTVDLWERRNIAQVTNCLSALGSVLQRVRPDLPSFGPRVSEENRREFTEEQMRAGENVINLQMGTNKGANQAGQNFGNTRHM	4.67	6.64
	A12, 11	39	EZ759214	contig01745:31:1008:1|similar to Vitelline membrane outer layer protein 1 homolog (Q7Z5L0)|Evalue: 1e-21	661	36669	16 (11)	36.5	326	5.89	MAAVFSTLLTFLLVLVCVFSQSDWADGGWKEIEAGSNTKGEWHDWEFCPNNMYVYGMQMRVEWWQGKGKDSTGLNALRLFCAPLGIYQQSASIESYAGLWGSWGKGFQCKQSLMQGIKVRNQAEQGDKADDAALTGVRMICSNGQVIEGTGNTWGDWMEDRKCPKEYAVCGIKVAFHESQGKGDDTALNKIRLGCCRVKLNTCVPKDRWVTLIRCDNSWSDSPSACRYKQEIGTSMSSSEAATLRKEQYLQYSTTAGIDVAGDPYGFKGIFSTSLGKSPVTDFDWTKSHDSGFGEVGSSDAHMTVEPRKIKYLEQLVGTCGAATVX	2.08	2.27
	A9	41	EZ761373	contig18805:99:1907:3|No Annotation	656	70519	17 (13)	24.1	602	6.29	MGYIQVILFLLCYWTLSSDASLVGFGCWRNNPSTKSGYSSAIAVLNNFMHGDAKIAGDVLKAASLVIWPKGDVAAEEMYCFDEEIHGNISPDIRRNFTNMLRGFNDQVNAILNVTKRDQRDPTIGPLLMGFHNNLTLYYDTFLQVYDIGKSSLYLREYALLLLGTQAEIINYCKSSCTDQEYTKWHEIFAKYNYAFSKYSYWFLKLMPKKMADNVVFDYDRLKNYDPSLKNQVNNKRLTEYDEFMGKCKGDFSISCNVFLLGFLKSARITARQKIEDYWTDLXFDFRRLLFKRYCVLDACQNDQYHEFFVRTGEKVAFQYQAQNNEQSWFCGRDFCSRMWLSTGGYRDYVYYRQCLGEDPFDLGIACFEDIYTICTQETGCSAQETLTNKLYPIALRAN…	0.98
	A10, 12	40	EZ761696	contig20267:78:1724:3|similar to Serine/threonine-protein phosphatase 2A 56 kDa regulatory subunit epsilon isoform (Q16537)|Evalue: 3e-169	654	62420	13 (11)	29.4	548	6.2	MSKSEKGSRLSSGSMGEGEKSESRPLPVGDPQVHTSRGAPIAVSPSSAAAAANTAAAPTTTSPAAHPTSSVVDQRDKMDAFAKRSAAKRRQRQSSNSQLNVASKAHVELEILPLLKDTPATEQEELLLKKLNLCSLLFDFMDATTDVRSKEVKRETLLELADYVSTNRGVLNDSVYPEVVRMVGSNLFRILPPADTPDYDPEEDDPSLEASWPHLQIVYEFFYXILESPDFNPQIAKKWIDTKFVYQLLELFDSEDPRERDYLKTVLHRIYGKFLGLRAFIRKQINNIFLRFIYETEHFNGVGELLEILGSIINGFALPLKAEHKQFLVKVLIPLHKVRCLGMYHAQLAYCIVQFIEKDATLTEPVIKGMLKFWPKTSSQKEVMFLGEIEEILDVIEPS…	0.85	0.9
	A9, 4-12, 17, 19	43	EZ762426	contig24061:1:1415:2|No Annotation	654	54083	16 (13)	31.8	471	6.5	YVVSASTIKMASFNLLMIAGLVSIAHGKLHLGSWENFPKDPQDNENMEQVLTAIYGEAQKDFFLTTEKAYTSFEYDDNTGYYTHSLSFYPSNFSESFRFKHGKPGVHTFAGKELEYTYSGHPENDTLNAVFKDRKSGLTFPKEYHFEEEGNLVIIHRIGDIVGRNTFRPLLTERAKGTWISTNEGENLHLLPQILNRPDVADINETHFITLNKTIHNYTLTTNRTKGPIKAQFVLGHPTNLTTADGKEFQYRFTYCTICETLFLNYTIKPEGASVQLKYKFDENGVTLHMSNGILSASRFYRRVIPDVLQGTFKFNGTSYNQEAFESAIRTKEKGHTNIDTIEIKRDGEFYVLKQTTGDKSLRYLFRLGEVGQTTAPDGTKLGFLFYYRTIPVYRHILR…	1.29	3.84
	A9	44	EZ761257	contig18256:135:2303:3|similar to Glycerol-3-phosphate dehydrogenase, mitochondrial (Q4R755)|Evalue: 0.0	653	81551	12 (11)	19.5	722	8.58	MPFSRFTWRKVVRGTGLIVGVPAVSYTIYTVYKMREMSKVYAETPTHMRPANYLPFLPSRDDQLTRLQEGAEYDILVIGGGCTGSGVALDAVSRGLKTALVEYDDFSSGTSSRSTKLIHGGVRYLQKAIFGLDYEQYKMVKEALSERANLLDIAPHLSQPLPIMLPVYSWWQVPYYYAGIKAYDFVAGRRNVKKSYYLSKERALELFPMLKKDKLCGAIVYYDGQHNDARMCLAVALTAAKLGANIANHLSXLDLIKVNXTGTTVSGVRVKDMITGKEWDIKAKCVVNATGPFTDSIRKMDEPTVKQICQPSSGIHIVLPNYYSPSNMGLIDPSTSDGRVIFFLPWEGATIAGTTDSPCDVTHHPIPAEKEIQFILREIRHYLSEDVDVRRGDVLSAWA…	0.6
	A12, 17, 19	40	EZ762392	contig23884:1:1288:2|similar to Eukaryotic peptide chain release factor subunit 1 (Q5U2Q7)|Evalue: 0.0	652	48186	12 (10)	30.4	428	5.57	MWKIRKLIKSLEAARGNGTSMISLIIPPKDQISRVAKMLGDELGTASNIKSRVNRQSVLGAITSVQQRLKLYNKVPPNGLVLYCGTILTDEGKEKKVNIDFEPFKPVNTSLYLCDNKFHTEALQALLTDDTRFGFIVMDGNGSLFGTLQGNTREILTQFTVDLPKKHGRGGQSALRFARLRLEKRHNYVRKVAETAVTCFISNDKVNVMGLVLAGSADFKTELGQSDMFDQRLQAKILKTVDISYGGENGFNQAIELSSDSLANVKFVQEKKLISKFFEEISTDSGKYCFGVDDTLKALEMGAVEILICWENLDITRYVLRNPNSGESKVIYLRGNQAQDKSFFVDKETNVELDIETSMSLLEWLANEYKTFGATLEIVTDKSPEGSQFVRGFGGIGGL…	0.94	1.3
	A17, 16	10	EZ759999	contig06130:205:919:1|No Annotation	650	26748	16 (12)	57.6	238	6.85	MMHTAFLLLCAIVAPSLAAKAASQGPPAECEKPFGEGKLATDANPYKFTISTHQRDDKVDYKKTFKGAPIELNIQFTKESGAAEITGFALRAGIPFPVVQWLDSQDSQAKIVSCIAPRSIDTYIVQGQIDDTYKAVATPLLAAWSNKERLPVTYEMAIKNSDNRIYVASFNGTMTVRETDYTLPKEFFQPPPSSQGQGGRPQMTEEQFKEFLRKNNMTPEEFMKAMQSSQHRQKRDVE	3.61	4.21
	A7, 4-10, 12	39	EZ763107	contig26982:1:1617:2|similar to Microsomal triglyceride transfer protein large subunit (P55158)|Evalue: 4e-31	650	59679	16 (13)	22.5	538	6.51	VLKTISQQKKVKKQTINFILDAIAASQSLDGFSAVIEMFNSTKRTDLDMDYLAFYFNSISFVVRPKATLIDRLMKAFDDIQVSLEFEENIALALGSLGFRLQTTDAHTLKDKILDLLVKKLNDCQDPEINTCRVTFLRAIGNLGDVRSLSTLLRHIKVFGRPSLAAIKALRRISLSHITSDETRTLQNALLDVWEQRTMIYDSSSRLAAVDWLLTHSISTEVCGRIIAVLPRESNVEVASFVWSRLKEFAQPSVIRNALIRAAQLNEKANYASLAAKGQSMTFEGLMHRNGSLSATYNLALEMENGAMKTSAVDVTLNHTNSLFQVISFGLYSHGLSSFLGSTDSDAQTQEDESASAGLNLDVMEVSLPSFVFFNGLSELMSLAWSASADKPVADVQMN…	1.01	1.88
	A12, 11	41	EZ762533	contig24391:1:1070:3|similar to 26S protease regulatory subunit 7 (P35998)|Evalue: 0.0	649	40008	17 (13)	50.7	355	6.63	DLAADKQTLQSEQPLQVARCTKIIERPNEDPHYIINVKQFAKFVVDLGDQVAPTDIEEGMRVGVDRNKYQIHIPLPPKIDPTVTMMQVEEKPDVTYADVGGCKEQIEKLREVLETPLLHPERFVNLGIDPPKGVLLYGPPGTGKTLCARAVANRTDAVFVRVIGSELVQKYVGEGARMVRELFEMARTKKACLIFFDEVDAIGGARGGDGDGSDNEVQRTMLELINQLDGFDPRGNIKVLMATNRPDTLDPALVRPGRLDRKIEFGLPDLEGRAHIFKIHARSMSVERDIRWELLARLCPNATGADLRSVCTEAGMFAIRARRKLATEKDFLEAVNKVIKSYAKFSSTPKYMTYN	2.3	2.57
	A14, 8, 13-15	23	EZ762431	contig24098:128:1165:2|similar to Fructose-1,6-bisphosphatase isozyme 2 (Q9Z1N1)|Evalue: 1e-124	649	37883	17 (9)	39.7	345	6.31	MQHSNSKHNIHGIQTDCVTITHYVLEEQKKFPTATGDLTQLLNAIVVAVKTISSSVRKAGIAKLYGIAGATNVQGEEVKKLDDISNELMINMLKASYTTCLLVSEEDEKAIEVESTHSGKYIVCFDPLDGSSNIDCLVSIGTIFAIYRKTAPGKVSEAXALQPGRQIVAAGYAVYGSATSMVISVGNGVQGFTLDPAVGEFVLTQPSMQIKSRGNTYSINEGYTALWDDAIKEYVHNKKFPQSGKAYGARYIGSMVADVHRTLCYGGIFMYPATKDSPNGKLRLLYECNPMAFIIEQAGGIATTGTMCVLDVQPKTIHQRCPIFLGSSEDVQEIIDLYKKHTSAQ	1.52	2.42
	A13, 13-15	25	EZ762195	contig23193:132:1322:3|similar to Eukaryotic translation initiation factor 3 subunit M (Q6DK91)|Evalue: 5e-53	647	45395	13 (10)	36.1	396	6.44	MQLKETMKNNNVPLFPSKTLDEQLIELSQYFKNELQADVAVPDEENQSEKILTICSLVDYSAHAFKVTQESVCESLLNGILTCTLYFELPEETLEKLVSSLSHKLADMNNSDTAAKFLFVRLKVLSTLFYGLDENSAMRFYPFCQLLELAGETQNLHRVVADSHKVKEWIAMWKLDEHKVRHLWRTLHNALLKSGENTKASRVMIDLLSTFSSETASEAKEEAIQCIQDAIADPYAVTLDHLLALKPVQHLKGEPVHELLTIFVGNNVAQYIQFQSRNGAVLEKMGLSHEANLKKIRLLAFLHLCRGKQEIQHAEIEKHLQLPSGEVENFIIEALRSRLISGKIDAARRRFRVTTCIEPTFTKAKWQELRGGLGSWLSQVRHMKRMLAAVTNPETA	1.16	1.86
	A13	26	EZ761951	contig22044:1:1305:1|similar to 3-ketoacyl-CoA thiolase, mitochondrial (Q3T0R7)|Evalue: 8e-145	645	47136	18 (11)	35.9	434	7.22	QIEHKSSDFGSLEVKSVLAFSNQQILFCTYFCLQTQDTEXAMRSAYIVAAKRTAFGTFGGKLKDHTATDLVVVSSKAALEAGKVQPEWIDSVAVGNVIQTSRDAIYISRHCALRCGIPVPVPAVTVNRLCGSGFEAIIHGAKEIAVNESEMVLCGGTESMSQAPYAVRNIRFSTKLGEDPKMEDTLWSGLTDTYINTPMAVTAENLAEQYKISREDCDKYALRSQTTWKQANDAGRFKEEIAPIMIKSRKGEEQFAVDEHPRDATIEGLAKLPAIFKKGGVVTAGSASGVCDGAATVVIASEKAVKDKALKPLAKIVGWHTVGVEPKIMGIGPAYAIQKLLEKTGLKLQDIDLIEVNEAFAAQYLAVQKQIQLPDDKTNLNGGAIALGHPLGASGTRIM…	2.16
	A15, 14-16, 18, 19	22	EZ762698	contig25021:205:1170:1|similar to D-3-phosphoglycerate dehydrogenase (O43175)|Evalue: 6e-99	644	34855	19 (10)	36.8	321	5.84	MADSIRRVLITDPIDPEFVSTLKSFGLIVEEKKLSADKLLQEIVHYECLIVRSGTQVTADVIAAGTNLRLIGRAGTGVDNIDVVAATAHNILVMNTPGANTISAAEHTCGLILSLSRSIPEACASVKANKWERKALMGNEVYGKTLAIIGLGRIGREVASRMQAFGMKTVGYDPILTAEFAERFGVQFVPLNAIWPLADYITVHTPLVSDTENLVNLDVLRQCKKTVRVINAARGGIVSESDLLTAIEEGSCAGAALDVFSDEPPTHQLRPLLEHPKVICTPHLGANTYEAQSRVAIELAEQIGVWLKTGSANGFVNKINV	1.98	3.2
	A14, 13-15	24	EZ760109	contig06876:2455:3520:2|similar to Probable deoxyhypusine synthase (Q9VSF4)|Evalue: 3e-112	642	40439	13 (9)	37	354	5.97	HQSFNMSFMYYHKETSGIDGYPAEQIDVCGYDFERGLNYEALLRSYHTTGFQATSFAHAVEEINKMIDCKKRPKDSNAVSRTNCTIFLSFTSNMISSGVRESIRFLTRHKMVDCLVTTAGGIEEDLLKCFKPMFLGKFELLGAQLFKKRINRTGNLLVPEIHYDALGHWIMPIIEQMHEEQKQGHVWTPSSFIRRMGKEINNEDSVLYWAYKNDIPVFCPALTDGAIGDYLDEYRNKRATGFILDIVEDVCAINQLARDAANSGMIVLGGGTSKHHICNANLKRMGADYCVFVNTGQEFDGSDSGARPDEAVSWGKVRAEATPVKIFSDATLIFPLLVAETFAKRFHSNDLNFE	1.38	1.54
	A9, 10	46	EZ763281	contig28039:246:1925:3|similar to Thioredoxin reductase 1, cytoplasmic (Q16881)|Evalue: 1e-165	641	61478	15 (12)	34.3	559	5.81	MENGPEIQSILLEISGQKTVPNVFIRGAHIGGNDAVTKMHAEGKLVPSLGLDKVDSAASGDQDSQDLGTYDYDLVVIGGGSGGLACSKQAAKLGAKVAVCDFVVPTPMGTTWGLGGTCVNVGCIPKKLMHYASMNGEALQESTEFGWNIQKDGITHDWNRMIQNIQDYIHSLNFKYRVQLKENNVEYINGFAKFTEPHKLHIRMKNGKEREITTKHAIIAVGGRPKYPEIPGDKEYCITSDDMFSLAYAPGKTLVVGASYVALECAGFLTGLGYDTTVMVRSIFLRGFDQDMAERIAKYMEEHKKTRMIRGAVPVKIEQIEPRTESKAGLLRVTSKTTDGKEITEEYNTVLLAIGRTACTAEIGLXKVGVELNKQNGKIHTTAERTNVPWVYAIGDVLD…	0.97	1.08
	A14	26	EZ760009	contig06192:1:1250:3|similar to Putative inositol monophosphatase 3 (Q9VYF2)|Evalue: 6e-48	640	45674	13 (11)	33.3	415	6.75	SALRLYCAKKSALPSPLHSSDFSILFCRFLQFRSVTAPAMAQDNKISLRTFLYVAIKAAEYGGKEVVKVVTDGALQTRYKAANVDPVTLGDLRANQVIMGILQKHFPTIPIVSEEDPEIGVAAQPLKDVQVADVSANPLPSEFLTRVASDETVSSQELTVWVDPLDATKEYTEGQYDCVQVMIGLAHKGRPILGVLHLPFSSVTYWAWLNHAHSDNLSTEALETQSTALDTKSESLQSKSDAERPLRVIVSQTRTHSGGVTEFASDAFAGRKVAMLYAGGAGNKILKVILRSADAYLHVTKIKKWDLCAGHAIINALGGQLRSLDGTQLDYSLPTDRKSGVLVDNGFIGAVNDFEWLMXXARRSNAPKAKLSKLQFTVSTGQVIKDTDYSISQTLELFL…	1.16
	A16, 15-17	15	EZ762225	contig23314:1:731:3|similar to Protein l(2)37Cc (P24156)|Evalue: 2e-102	640	27164	16 (10)	50.8	242	5.84	GGQRAVIYDRFAGVRQTVVGEGTHFIIPWVQRPIIYDIRSTPRNVPVVTGSKDLQNVNITLRILFRPAEDQLPRIYQIIGMDYADRVLPSITNEVLKSVVAQFDASDLITQRPVVSQRVSEELIERAQQFGLILDDIAITHLTFGRDFTQAVEMKQVAQQEAERARFLVEKAEQKKRATVISAEGDSIAAQLLSDAFTKAGEGLIELRKIEAAEDIAFQLARSRNITWLQNNQQTLLSIPPT	2.57	4.21
	A19, 17-19	8	EZ761392	contig18859:1:662:3|No Annotation	640	25323	36 (11)	57.1	219	8.53	LFLVSLVLFHSTARTLENMIRWIVALLAIGLVHAATRYDVELRQFSNKRGTKSDGQRCDRGSGCDHRFSGYLDLDHPTARWPGVGKPVTSWVKISENYNDNSPRIDRIISKDICRTSQARPTKANLRILVVDEDGKNKKDEIVEQFQCITDSLRPSRSKSSASWSEEMPCTAQFKPSDHQLNFRYRAYEIPESDCDNEEAPVAGRNPYSSSWRRTSNLD	6.27	9.82
	A13, 12-15, 19	27	EZ759971	contig05979:197:1027:2|similar to 4-hydroxyphenylpyruvate dioxygenase (Q5BKL0)|Evalue: 2e-108	639	31475	17 (9)	43	277	5.36	MTSYDDKGPKPQRGRFLAFDHLTFWVGNALQASSFYCTRFGFRPIAYRGLETGSRDIASHVVQLNKIRFVFQSPYSGRNEEMNRHLTIHGDGVKDVAFTVEDLDGIVAKSKERGARIVKDIWSEVDEGGIVRFAVVQTYGDTTHTLVERGQYSGLFLPNYAPPMVKEDPLLDKLPETYLGFVDHVVGNQPEDEMANTAEWYEHMLQFHRFWSVDDSQIHTDYSSLRSIVVSNFEETVKMPINEPASGIRKSQIQEYVDYYGGAGIQHIALNTTDIIA	2.33	3.89
	A11, 10-13, 15-18	45	EZ763285	contig28056:1:780:1|similar to Methylmalonate-semialdehyde dehydrogenase [acylating], mitochondrial (Q07536)|Evalue: 2e-116	638	27837	14 (10)	59.8	259	5.61	SGKRVQANLGAKNHGVVMADANKENTLTQLVGAAFGAAGQRCMALSTAVFVGDAKKWIPELVERASKLKVNGGTEKDADLGPVISPEAKQRILELVQSGENEGAKVVLDGRNITVKGYEKGNFVGPTIISEVKPEMTCYKEEIFGPVLCVLTADTLDDAINIINDNPYGNGTAIFTTNGATARKFTNEVDVGQIGVNVPIPVPLPMFSFTGSRASFAGDMNFYGKAGINFLTQIKTVTSLWREQDTTDQRPATAMPIMQ	2.09	3.77
	A7, 4, 7-10	40	EZ760160	contig07244:1:968:2|similar to AP-1 complex subunit beta-1 (Q10567)|Evalue: 2e-159	635	36460	14 (11)	44.7	322	5.22	IWPFLAVNTFVKDCDDPNPLIRALAVRTMGCIRVDKITEYLCDPLRKCLKDEDPYVRKTAAVCVAKLYDINPQLAEDQGFLDALKDLLSDSNPMVVANAVAALGEINETSNHPIIDMNTAMVNKLLTALNECTEWGQVFILDCIANYIPTDEREAQGICERVTPRLAHANAAVVLSAVKVLMKLVEMLSTDSDFVTALSKKLAPPLVTLLSAEPEIQYVALRNINLIVQRKPEILQHEMKVFFVKYNDPIYVKLEKLDIMIRLASPGNIAQVLAELKEYATEVDVDFVRKAVRAIGRCAIKVEQSAERCVSTLLDLIQTKVN	2.1	2.76
	A10, 11, 13, 15	41	EZ761853	contig21263:1:1713:1|similar to T-complex protein 1 subunit delta (P53451)|Evalue: 0.0	634	62058	18 (13)	35.4	570	6.66	VEERQTKGLLLFGLHQFFDLFGFSLQFSSVHTSTMAAAAAPLIADMSGSNSQFKNRHKPTEVRMSNIQAGKCIADAIRTSLGPRGMDKMIQAGKGDVTITNDGATILKQMKVIHPAARMLVELSQAQDVQAGDGTTSVVIVAGALMEAAAKLLERGIHPTIISESFQEAALKSVEILRNMSIPVDLKDRASLIKIAKTSLNSKVVSQYSDQLAPLAVDAVLKVIDPAKPSYVDXNDVKVIKTLGGTVEETELVEGLVLGHKTQGPPDAPTKVEKAKIALIQFXSIATEDRHGKPSDISDYTQMDRILREERAYLLNIVKQIKKAGCNVLLIQKSILRDAVTDMALHYLAKMKIMVIKDIERDEVEFISKTLGLRPIASLDHFVAESLASADLVEQFDSG…	1.06	1.45
	A11, 10-17	47	EZ761411	contig18927:1:1035:2|similar to Lysosomal acid phosphatase (B1H1P9)|Evalue: 2e-48	629	38936	32 (10)	46.2	344	8.26	NNVATGRTLRMIQVVRRHGSRAPWTAFPGDPYANTAWATGYGQLTLKGQKQMYDFGTYLRNTYPEILQQELKPAEIQVVSSIAERVINSALLNLAAIFPPTKNQVWSNDLGTVWRPVPLFTIPRELDNLLYLPSKICPNLDKSRKDIKDSPIAKNIERQSQDLVQTLKQNTQAKNLDDFWDGVYDVFDWVNCMQAEGLQLPNWITPDIIRRLNLIAGLQYHMMVGGNNDIPRTRLEGGPLVNVLLNRMYGSFPSGNSTGDGKKFILYSAHDNTISALLAAFKAYNYTETGPNMGVANYASNIVFELYDDKTVRVRHKNNPNNVFDAPTTVIFPGCSEFCPLDQL	3.71	6.53
	A17, 16-18	11	EZ761249	contig18219:1:768:1|similar to Proteasome subunit alpha type-3 (P25788)|Evalue: 1e-89	627	28291	15 (11)	43.5	255	5.6	KMSSIGTGYDLSASQFSPDGRVFQVEYAGKAVENSGTVVGIRGKDGVVFAAEKLVTTKLHESSANRRIFRIDTNIGMACAGLIADARKLSEIARKEAADYRSQYGVVIPVKELTKRVSGYVHAYTLYSAIRPFGVNCLIGGYDSVRGAELYMIEPSGVSWAYFGCTAGKAAQQAKTEMEKLKMQDMVCSEIVKRAAKIIYGVHDEVKDKEFILEVGWCSEQSGAIFEMLPKSMLEEAENYAKKSLEDDEDSEMQS	2.4	2.77
	A13, 12-14	28	EZ761568	contig19694:48:1100:3|similar to Sulfotransferase 1C2 (Q9D939)|Evalue: 2e-44	627	41321	16 (10)	45.7	350	6.39	MSFLDDYREAERRKSESERRKSETEQPKVEKTPEESEAPQAIRRKVSIWQVDYDHPEFLHNYKGCLIHWPFYTVMDEIEKFEATKDDIAICTFPKCGTTWMNAIVTLIMNNANRSVLHDGKALEWKNPYLELTDPKMKEGHRPIDILNRSPSPRIFFTHLSYDALPESIKKNGTKIIYVARNPKDTVVSLYHFLTAHVPINFTHDMNEVVNSFVEDRVMYGPFFDHIAGYYKLKDSNPNMFFTYFEDLSRNFIPVVRELSKFLGKNLNEDQLNTVAYECAFEQMKNNDTVNKAKVGERGYLDFNKSPFIRAGKVGNWQTEFSFQMNNKVDPWIEKNLKRPELQGLTFQYT	1.72	2.39
	A5	20	EZ762143	contig22943:472:2127:1|similar to HEAT repeat-containing protein 7A (Q8NDA8)|Evalue: 3e-15	621	60936	14 (11)	30.9	551	5.93	MSTLKSKWDLLKDQGTEILYGLIVALKIVKEQTVKSNIEACVRVIGEQDAQLTATILVDQPVPLHPAISDLWKSLGSAPNLAPIFIAYCLDILRNKFVYSEVQNYSKRISLPVLQSLSVLCEIFQLSENSALIRNNFADILPILTVITAATVGTQPPKTPTTGPENTVDVDWKQLHKMKPSNVAVNCLKYLLKNTNCIVPISFEMIEDHNMYAEGLYVTAKCVFQTTDIDSKRVAQNLVPYLESEIAAKKAAAVAVLSAMLESKKPTEPENVGPVVEHLVSKSSDNYAIVRQLCIRGFGSLSVFGESVVRDYSDSILRCISTGLEESVDPEAGHSVPVESMKSLNRLLPLLSRDLESQITSFALRLRPFFENGNPMIRAMAFSLFGQVAALAESDSTKQ…	0.78
	A14, 13-18	28	EZ761738	contig20526:1:608:3|similar to Malate dehydrogenase, cytoplasmic (O48905)|Evalue: 3e-39	621	22687	27 (10)	49.3	201	6.13	DHNRAIGQMAIQLKNRAENLRKMIIWGNHSNTQFPDTRFVEINQDGQWTKMATIEHDKNWMKETLIPLVQKRGAEVIAARKLSSAMSAAQAAADHMRSWTQGTKEGEWVSMAVSSNGEYGVPQGLIYSFPVTCANGQWKIVPDLAIDEFAQNKMNITAKELEEERQEAEVAXVLKLSYGEVCRAVTGVDRYLVVVLMGYFA	5.9	10.05
	A17, 14-18	12	EZ762998	contig26339:1:396:1|No Annotation	621	15458	43 (10)	83.2	131	7.93	MTTYPSHYDSGRYNSSNYDSNRYDVNRYNTTNYDSNRYNTNYDSNRYNTNYDTNRYSGYGNASSGHYNSHPSTGYRTIHETREIVRDSDRPFGHSNVYSGHTGYNRDNTYSRDFNTGYGSSDRHYSQYGRF	34.89	55.04
	A17, 16	13	EZ762773	contig25359:2854:3612:2|similar to Uncharacterized methyltransferase GK2543 (Q5KWV8)|Evalue: 5e-05	619	28870	12 (8)	42.1	252	5.44	MAAGSTFSIHHVGDLSSREDFIMTEMPNRWDNESLDAYCADFVKLAHDIPMWRPVLDLGVGTGYTTKKLLEVEANVIANDLKIERLEALKKSLAPQELRRLQIMAGDALQLVVPTASLDGILASRLINYLRPYECRILMNDFYRWMAPGGYLCVTAYTPYSNTTQFGIETYQHRKYNGDEWPGILTEEMFVDSKKGKLWLGDWIYGYDPDILAREVILAGFKVRKCTYYGTKHTSPDALEEACNLVGIIAQK	1.98	2.1
	A6, 3-17, 19	23	EZ762982	contig26256:1:544:1|similar to Myosin heavy chain, muscle (P05661)|Evalue: 4e-37	619	20475	13 (7)	43.1	181	5.13	ALRRENKNLADEIKDLTDQLGEGGRSVHELAKSRKRLELEKEELQAALEEAEAALENEEAKVLRAQLEVSQIRSEIDKRIQEKEEEFETTRKNHQRALDSMQASLEAEARGRAEALRMKKKLXVDINELEIALDHANKASAEATKNVKSXSAADQGPADKVEEEQRSRDDAREQAQAAERR	4.34	30.15
	A15	24	EZ760013	contig06212:1:430:3|No Annotation	618	15630	49 (7)	93	142	6.45	TSPVRPAPVLRPQPTQVNYGQVNYNNQNQQQNQQQNQQVLSAVDASRAQIAAAIQQGANPNHFGVQTNARYNIAQAPNAQNPDVYTALDALRGRNDLTIDEILNILTNAVAGRDYPIYNDIPSTRFSCENVKQAGFYADAKA	40.62	85.41
	A10, 9-11, 14	44	EZ762371	contig23818:1:1081:2|similar to Glucose-6-phosphate isomerase (P08059)|Evalue: 8e-146	613	40564	16 (10)	47.4	359	6.45	KTFTTQETMLNAESAKTWFLQKAKDEKHVALHFAALSTNSAKVKEFGMDEKNMFPFWDWVGGRYSLWSAIGLSIALFVGWDNFEQLLEGAHYADKHFRETPLEKNIPVIMGAVGIWYGNFFGAETHALLPYDQYMHRFAAYFQQGDMESNGKYVTRNSKRVDYSTGPVVWGEPGTNGQHAFYQLIHQGTRLIPADFFAPVQTHNPIRKSAHHKVLLANYFAQTEALMRGKTSDEARKELEKSGLKGEELEKLLPHKVFEGNRPTNSFFFQLLSPFVLGTLIALYEHKIFVQGVCWDINSYDQWGVELGKQLATAILPELDSSAAADNHDASTNGLINFYKKHANDGLKGSQNGGQQLNI	1.77	2.01
	A13, 12-14	29	EZ759441	contig02901:61:934:1|No Annotation	613	33114	20 (10)	41.2	291	7.45	MRTTVLLLVSLVYCVSGQYGTGETLATCTLYADKRATCRGRLRCRTSDVTPSANLDRDCPRQLAAASGTWNEDQGVVPASLLDRGSSSAAQLASCTFAARNRQGTFECQGTDGNNWRGEYTGSVNTAFNLGLPAADSLAREDPYSRDNTYDRDNDRGRGSTTGRDRDTYGRDRDTYGRDRDTYGRDRDTYGRDRDRDSTYNRDNYGSARRGTPYSGVDNSLDRDRPSSNYDRDNRFSHRTSGYDSSDSGRTNTDVVMCSYMNDGKVNCRDCSERSERVSTPEPATRRHYTC	1.86	2.4
	A5, 4-13, 15, 18	21	EZ762775	contig25376:1:1382:3|similar to Spectrin alpha chain, brain (P16546)|Evalue: 0.0	611	54137	11	33.3	459	5.1	LSSVSTLITKQETFEASLAAFEQEGINSFTNMKNELVSTNHRQTGAIVSRYNTVFDRWTRLATASANRKERLLRSQEQFRQIEELYLLFAKKASAFNSWFENAEEDLTDPVRCNSVEEIRALQEAHNQFQDSLSTAQSDFEQLAALDRQIKSYNVGPXXIHWFTMEALDETWRNLQKIIRERDNELKKEADRQEKNDQMRQEFARNANAFYQWLTETRNSMMEVTGALESQLEQIRRKASEIRAKRDQLKRIEDLGALLEDHLILDNRYTEHSTVALAQQWEQLDQLGMRMQHNLEQQIQARNTSGVSEDNLREFSMMFKHFDKDRVGRLDHQQFKSCLRALGYDLPMVEDGQSDPEFELILDETDRNRIGYVTLQDYMAFMISRETENVRSKEEILLA…	0.91	4.52
	A9	51	EZ761197	contig17990:1:716:3|similar to Phosphoenolpyruvate carboxykinase, cytosolic [GTP] (P07379)|Evalue: 9e-107	608	26168	15 (11)	62.2	238	7.74	RFPGCMQGRTMYVIPYSMGPVGSPLSKIGIEITDSPYVVSSMRIMTRMGSQVLETLGESDFVKCLHSVGKPIEGDKKEESEVWPCNPEKTMIAHIPERNEICSFGSGYGGNSLLGKKCFALRIGSILAKREGWLAEHMLILGITNPQGKKIYITAAFPSACGKTNLAMLVPTLPNYKVETVGDDIAWLKFDENGVLRAINPEAGFFGVAPGTSSKTNPNAMKSIDRNTVFTNVAETSD	3.75
	A13, 12, 17, 18	30	EZ763068	contig26710:1:1127:3|similar to Obg-like ATPase 1 (Q7ZWM6)|Evalue: 1e-155	601	42366	12 (10)	37.2	374	6.08	KVGVVGLPNVGKSSFFNVITKSAVPAENFPFCTIDPNENRVAVPDDRFDFLCKYHEPASKVPAYLNIVDIAGLVKGASEGQGLGNAFLSHINACDAIFLMMRAFESDDITHVEGDVNPIRDAEIIMEELRLKDEEMLKATYDKLERAVVRGNDKKKEPEYLVVKKVYHQIVEEKKHARFLEWNEKEIDVLNQFLFLTAKPIVYLINLSEEDFIKKKNKWLPKIKEYVDKNDPGASIIPFSVALESKLVDMPDDERQAYLDSKKVHSALDKIITTGYKALQLEYFFTAGKDEVKAWTIQKGTKAPGAAGRIHTDFEKGFIMAEVMKFDDFKEEGSENAAKAAGKYRQQGRNYTVMDGDIIFFKFNAGAGLQAKKK	1.12	1.71
	A16, 15-19	19	EZ761552	contig19588:68:937:2|similar to ATP synthase subunit gamma, mitochondrial (P05631)|Evalue: 1e-97	599	32022	24 (12)	58.1	289	9.2	MMPATVVLFVPQIGQVRGMATLKDISLRLKSIKNIXKDHEIDENGVRSKYARAERELKPARPYGQGATAFYDKAEIKADESKPNQLIVAISSDRGLCGGIHSGIAKTIKADLAAKPPTNVKVVCVGDKSRALLQKTFGKDFLFVVKDMGKKPPTFMDASSIAQAVMDSGYQFDYGSLYYNHFKSVVSYKATVKPLYSLDTISKAEKINTYDDIDADVLKSYQEYSMASLFYYALKENATSEQSSRMTAMDNASKNAGEMIQKLTLTFNRTRQAVITRELIEIISGASAL	3.41	5.75
	A11	50	EZ761937	contig21929:197:901:2|No Annotation	599	23354	30 (8)	38.3	235	6.38	MSSYGNNGSSWGVGMGYSGGAGQENRSYDSTGYSSYGDRDRNTSYGFSGDNRSSGYGSSGFGGHSGSYQPSSTQYRTESTTYIRDSDRSGYGGSSGSAGYGSSDRYGSSGNQYSSSNTGYGSSGYGQSGSGYGSSGHAQGTGGWGSGMSTGYGSGSGSGGYGSGSYGSNTGSYGGGMGGHGSSGYGPSYGQSDRRDYNSSSTMGYGQDRYTSGSHTGGYGQSGQSGYGQSGYGSS	5.55	20.93
	A9, 9-11	52	EZ761207	contig18027:84:1786:3|similar to Arylsulfatase J (Q8BM89)|Evalue: 2e-69	597	64210	14 (12)	24.3	567	8.91	MGYRSALPKVIWVVCFLLSGTVDSAYTGVNKPFEQYNQRPAGGQSGRSDQRPARQPNIVFFLADDLGYADLGYTGNPQVYTPNIDKFAREGIILNRVYSQATCTPARGALMTGKNVFRLGLQDLPIDPGAPWGLPLNEKIMSQHFRDLGYDVHGIGKWHLGDYSRNAYPTRRGFSSWFGYMGLGSHYYNYSLVNLQHKINGLDLRANEYLVRNITGQFIGDLMSERAAKTIYEQDPNKPFFLYFSSPFPHVSFNGIGDSLQTTYKYFSHPAVQAIPAKFYTRRRHIANLIAMDEQFKLLIDELTWKGVLDNTIIVFQSDNGGDTMVNEQPGSNWPLRGGKASNFDGGSRVLSFMWSPLLPKQKAQSDMLIHVTDWLPTLYEAAKGDVRKLGDIDGVSQW…	0.82	1.6
	A15, 14	26	EZ762917	contig25959:606:1558:3|similar to Annexin A6 (P51901)|Evalue: 2e-70	597	36550	17 (14)	55.2	317	5.31	MAYNNSVIKVAPDVYEPCVREHPQFNAEDDAKALHKAMKGFGTDEKAIINILTRRNNRQRQIIADHYNLMYKKDLIKDLKGELSGTLENVVVALMQLPEAFDAAELRASVANLGTDEDTIVEILCTRTNNEIGAMRAAYNAIYGKDVYKDIADDTSGYFKKLILTELEVARDESNEIYPSQAYHEALALWETGPKKWVTDEAFSIPIFTRRSFSHLNQIFREYKNICGIEIEKDIENELTGDTKDFFLTIVRVCRNKQKYFAEKLYKAMKGLGTDERTVIRIVVSRAEKDLGNIKEEYFRLYDKTLESWISGDFSGD	2.68	2.87
	A9, 4, 6, 8-10, 13	53	EZ761158	contig17805:111:1346:3|similar to Basigin (P17790)|Evalue: 2e-16	596	46792	15 (11)	30.4	411	5.61	MLRETLLLLIALTAANAQVTINRDDSRDGGAAYYTLGSRVVLICSVAEPWRIVGWKHANESQMIVGNRVSGDAVTKTLTFDRLSEEDGGEYSCIAENNSGQRYTNSTYVNVVSDRTLRGSDTITDKKLKEVRLYCNQTLNPPLPLTWYFRNESNERVSEDIVEGTGVSVDAKDRYALVLKNPTELRQGTYVCKLNTTGIAGLEKFEMRSDRPIQAESRYMSAPHVKFEETGRSKSVTFGENFEFNCVATGVPAPSVQWYYANETEGATPVPIFSNTEDTDHSRLEVASEDGISVSRHFTYNTSINPDNRHETRSKLRISNIEEKDRKQYICLAMNQYGSNNATMMLRVKDKLAALWPFLGIVAEVIILCIVIFIYEKRRSKHVEDEDETEPMRADTTVV…	1.26	2.81
	A14, 12-16, 23	30	EZ760066	contig06624:111:986:3|No Annotation	596	33305	28 (9)	48.8	291	8.17	MLALCAFATTGLCQQNPNQSSQNEIHDFLKKLYSGALFGVKSCSKPSHCGFNMKCDTLMRLCVPYDTPVLQETVKQCSLDDDCTFGHRCINQGFGLVGTTGFCRFCGPKSCKNNVDCCGGVSGAQYECTSLEHSAKQALKQQLGQGMPNSVYGLNPSLNPNKSPEGMESEEVLMQNPNIANDPLFTGKRCWQRCFSDNDCHLNSRAPPEVRNQTACCQGHCIRRESCIQTNAMMPPPQPGYFAQQQPMQVVSMTVNRQPAPVNQWQQGQGPAPIGSYYYQPPTTTQSTRRV	4.03	6.49
	A13, 12-14	32	EZ763100	contig26942:1:1185:1|similar to Trans-1,2-dihydrobenzene-1,2-diol dehydrogenase (Q642M9)|Evalue: 2e-57	595	44800	14 (10)	30.7	394	6.19	KNAMQNVADKLTGKADGSNAMTLRWGICAAGLIAEDFVANLASLPAQHKVLAIASESDSERSTMISQKYNIPHVYDNYAAIAANPEIDIAYIAVIHPGHYEACKTMIAAGKHVLCEKPLTLLMRHTEELLRLAKEGGKFFMEGCWSRCFPAYKTLETELKNAGDIDVISISFLHRMPPNNQRLHRHVLGGSVLMDIGIYCIQAAMVPFGTTLPDEIYAHSIMEDGNVDVTTSVTMKWGNKMAHIVSSSLAEGQSEAVYAGEKGHLKLKHPFWCPSSIDICRDHKNEPATPSKCETYPLPKIVAQCNFINGEGMQYEIDEVYNCILQGKTESDRWTHEHTRALHTILDKIQRQIGINFEDCYENDKYIKQDQNSPNKPKQPLFVEPFRMRSLCSS	1.03	1.6
	A16, 14-20	20	EZ762384	contig23852:3162:3608:1|similar to Troponin I (P36188)|Evalue: 2e-23	595	17536	35 (9)	43.2	148	7.93	KKEQERKSEERRRILNERIGNDSHNNVDDENRLRDICKQYHERIRTLEEERYDLEVKVRAKDYELNELTIQVNDLRGKFVKPALKKVSKYDTKFAKMEKKGQDAAVDFRSNLKSTGISKFAMEEEKPSEKEKPEWAAKKGTGEEEVEA	22.84	32.94
	A15, 13-20, 23	27	EZ760591	contig10939:1:797:2|No Annotation	592	29117	157 (10)	34.3	265	6.96	KRRAVACESQGSISVSSESSGPYLRSSNQPFFRLLYSTKAVLKMSHQQTREVTKEIHVESSGQSGASSHASGHVVAGHETSAVEHTKYLHTETKVPMATPAPPIIHASSGLQHMEGMTASAARITAGSAETTNVQVSEEVRRRDQAQFEREAAAIAARHEKDVQAKTEAYRKETEEQAEKIRRELEKQHQKDVEFRKDMVDDTINRQKREVELESAMAKRQLEREAEAAKAALDKSKLSTDIHVELNTAAGNTVAGGTTTSVSQS	6.84	16.76
	A6, 6-9	25	EZ761155	contig17793:1:1217:3|similar to Laminin subunit alpha-4 (Q16363)|Evalue: 2e-58	590	44418	11 (9)	31.7	404	6.09	RPETYTTTTTAKYDGPMLSSCQLPLHPSEDSTAATAMRFGDHPESRQEFKLSPASYADNSDFSVDIKTTASDGVILYVDDQKATPVDFLALYIKSGQLVYAFNPGSGSATARTDQRFNDGRWHSVRMLKRNSSGQLFVDGTLLAQSSSPGNTQTLNVKTPLYLGGINGNHSATRNLDAVTSPFVGCLRNLRLSEQPIGQASRTLHIEPCTDNQETGTYFAAEGGHLSLKNSFKVGNKMELVIQVKPRSNNGLIMYIGTSNKRRDFVALQLIDGVVDFVYDNGAGVARVNISLPSPFSICDGNWHTITVAKDRHVGSISIDDTENDIVMGPPGQSSADTDLPIYFGSLPVNWPNTRLVLRNQYVGCMRNLRLNGKVEELSQSTNVVGNVLLNSCYXXXYE…	1.05	1.26
	A11, 10-12, 15, 16	52	EZ761488	contig19267:1:1403:3|similar to T-complex protein 1 subunit zeta (P80317)|Evalue: 1e-161	590	52151	13 (12)	30.5	466	6.43	KHPIASLIARTCTAQDDVTGDGTTSTVLFIGQLLQKTREYIISGVHPRFLVEGFEVARVKALEILDKISVKCGAEREQLLDVARTSLRTKMHLSVADHLAGIVTDAVLGIRQEKEKIDLHMVEIMEMQQKTEMDTQLIRGLVLDHGARHPDMPKRIDNAYILTCNVSMEYEKTEVNSEFFYKTPEEREKLVEAEKQFILQRVNQVIALKQKVCGSGEDKGFVVVNQKGIDPTSLDMLAREGIMALRRAKRRNMERLVLACGGAAVNSFDEMTTEVLGFAGSVYEQVLGEDKFTFIEDCKNPKSVSILIKGPNKHTITQSKEAIRKGLRAVFNAIEDGRIVPGAGAFEFAVHQSLRALMNSDESKLGKSALGVKAFAEAILIIPRTLLQNSGFDWHDFSP…	1.09	2.11
	A12, 8, 9, 11, 14, 16	44	EZ758904	contig00023:136:1154:1|No Annotation	590	37758	26 (11)	40.7	339	5.95	MSTHRDRDSANNEYIAETVSSVTTSTAADLTTGRTLYATPVTSTARHHDTTTSSHTSQRMATDYTTGAGTVYTEKTVMREPVNVVHTQIDRVTAVPITETQVHAETQHYLHTQMRTPVVESHPPQLPAHTDVAGSILNDSAFSSTAHISTNAMHAQAVPVDAAERARQEEHFRREADRIALQHQRAIDEKSEAYRRDTEAQAERIRQELEKQHLRDVQFRQELVDDAITRQKREVQLEAQAVMADLELERRRAHEALERSKMSTDINVNIDTLAGSTTAGGTTVIEKTEVQKGVAYHTTPVGVTTHVEYADRPTTTHRTETTTTAHSTHTTEGHHRGSD	2.53	3.75
	A12, 13	45	EZ762758	contig25304:139:1407:1|similar to 26S protease regulatory subunit 8 (P62195)|Evalue: 0.0	589	47296	14 (12)	40	422	6.86	MAAVEIHRHVATAPTTTSAAMDIDDVTSDQSSGEGLKEYYVSKIEELQLAVGEKTQNLRRLQAQRNELNAKVRLLREELQMLQEQGSYVGEVVKAMDKKKVLVKVHPEGKYIVDVDKNIDIQSLKPNMRVALRSDSYTLHKVLPSKIDPLVSLMMVEKVPDSTYEMVGGLDKQIKEIKEVIELPVKHPELFEALGIAQPKGVLLYGPPGTGKTLLARAVAHHTECTFIRVSGSELVQKFIGEGSRMVRELFVMAREHAPSIIFMDEIDSIGASRVEGSAGGDSEVQRTMLELLNQLDGFEPTQNIKVIMATNRIDILDPALLRPGRIDRKIEFPAPNEDARVDILKIHSRKMNLTRGINLRKIAEKMTGASGAEVKAVCTEAGMYALRERRVHVTHEDF…	1.4	1.47
	A8, 7	48	EZ761802	contig20889:132:1709:3|No Annotation	586	60506	10	24.2	525	5.42	MVATVTVLVVLITVSDVYGRCNVTEKGVLNSNKCYSVLSTTWTTGSKYSADAYKSFTTGFDGEWLYADKTYLDKERRDFYDSEAQCRKLGKGLPGQRWKIAEVNSEDEYTALYTYMKELEVQNWHLHIKQFWLGNPISQQNPNTTHFNISTYLQATRNRTEANDHYGIIKDDGRLWTLPSETQVSVVCQRESEGANIQYNWTLLKNYTFPGETLDENLWTASTGIRRYQWKAGYSCDALDPLNNTHLQAWAKSEDGLWKLTPAWDVQNGTLLLKRLATPENMTYDHRILPCVKVALRETFRLNETTGNRIRVEVTGRFPTYVGVRNNIGFRWRNQSYYWPTESVANVSDSNTEKRQTDPASADLDHSPKSSDIDFFVTQPDFDMSHSNTMDIISRYANL…	0.7	0.75
	A8, 4, 5, 9, 12	49	EZ759259	contig02001:99:2246:3|similar to Transmembrane protein 214 (A4FV45)|Evalue: 1e-24	586	82912	13 (12)	24.3	715	9.41	MGDSDLDVNDTKGWQKVEEKKKKAAATQGKSNKDSKTNQASPTKHGVVQKPKRPMNLPHKKMVAAPNLQTDSESYSEDEQPKGKRPEKSVSKSGDEERVKSDRKMPTLEELVPKLKVDKLKDIVEQSKTRFPNSDLWLKDVAFYVNHALSQVPMKSPSYEGENFGYPLNLASDKFLTFFXDKQLLVLPDDVYRQFVSWCVYELAAEHAKKQTTHGLRFMVQYLLSRQPQLLNDRIVSEVSQEVIEQSSRKGDMLTRMWAVSQVGLSSLELGFKNWYTVAFPLLNSKNYTSFVMNYLDSLFLHHKKENLKNLDMHTHMKVFDAFLGXASSGLTIANRQHLAELYYRFSAVSFEMQLAEHAKEYFAQFLTRLRPDATATSKKAACDNMIQCIEADPSVLEF…	0.53	0.77
	A13, 12	34	EZ763030	contig26482:1:1206:1|similar to Medium-chain specific acyl-CoA dehydrogenase, mitochondrial (P41367)|Evalue: 6e-150	586	44533	14 (11)	37.7	401	6.79	HTKTEQVFPSICFELSDDQKSYQELARKFAREVMLPKAAEYDKTGEYPWDIIKKAFELGLLNSHIPQEYGGPGLGSLDACIVIEELAWACTGMATAIAANGLGQAPILISASHEQKKKYLGRMTEEAMMCAYCVTEPGTGSDVSAVKTAARRQKDGSYVLNGTKMWITNGGYANWFFVLARTAEDPNVPVHKAMSGFIVEADWKGVVKGRKEWNMGQHASDTRGITFEDVVIPKENLLATEGAGFKIAMGAFDHTRPPVAASAVGLAQRALDEATKYSTERKTFGKFIYEHQAVANMLADMVIDVHNARLATYRSAWEVDQGRRNTLQASIAKCYAADIANKVAADAVQIFGGNGYNSEYPVEKLMRDAKIFQIYEGTSQIQKVIIARELITRYQKEAG…	1.36	1.9
	A7, 4,, 5, 8	41	EZ763192	contig27506:82:1055:1|No Annotation	585	36878	13 (12)	39.8	324	7.59	MYLLTFLPFLSLFSLFQGLNSESVGTVLQYKYVTTTNIGHDKNGVGSDGLTIEGTLKTAILWADSQNPRESLRSIQLTTVKGIDCAHCDKQFLYYTNGKESEARDERVYFGSDETVVSRNFKRGIARLFQDFRTFRQTWSNVEGCTSTNEILQSKEAEHNGSEFSWVWCRKRSSVLSIAETQMKAQSQLELQLTVKRTAEGAIRNAKLLEIYQSSVELTKSVLFNTTTQQKITLDTAAAKEAPVRVYSCLHEATAVLRNFKSEPMQFEKGNKESTTAMDSAELIQNIKSRQKYFGLKYAASDDATKAFLEIEKFIENATKDQIV	2.06	2.43
	A7, 7-9	42	EZ759427	contig02827:1:1595:3|similar to Melanotransferrin (P08582)|Evalue: 5e-36	584	60839	13 (12)	31.7	530	5.88	SVLYQQGQLKIAQCGESYMDATMKYFGEMCAPYDTHNFTEEENNKYRRMCSLCNGQHCPPLDQLGKDFPINCLVQNSGVDAPSFPLQRFGCHFKEDLXPDPTQYHVICPEAQESTNGNFVPLVDNNNKPLPEWLDCHYGRIPSHAYIARPTMPRFPDVSDRIQELFMFKKPDSNSGQGFNQLQSNSQYNNWFENFFSGKYDQQSVVRIHTFYRSEESDIRKYLDGYNAYLEDPAACTKDRAARWCTTSNIDFQKCELMAKAFQMYRIRPELMCEKPVKHSYTCMDRIQRNQSDITVIDVADLLTATNYYDAVALAQERYYVSDDSGYSQPSGPIDEIYSVAIVRDSGIKTLSALQGKKACFTGIHEAAGFVLPMYSLKSQGLTSNPNNYCDLVESANQF…	0.98	1.2
	A8	50	EZ759599	contig03695:118:2208:1|similar to Acylamino-acid-releasing enzyme (Q8R146)|Evalue: 8e-131	582	79093	15 (14)	20.5	697	6.41	MADVASAAATEYELIARTPFPVSVFVYPSHENNGEFVVQSTWSQKDLVRMQKTSTRKTYLVNLSENAEEIRVRNCGLPSDCSVEKCHNYSSDGSLRVTFATFRPKKESEEKELIEVYNQSGKIASNYLGVTKRHGKVYLDDEFRSFELSPGSDSPHLLYIAEQYVPKSESFFAFTTRNEAENLEDAKTIPRGQEFLYRETWGEQLDNKSHSVISVLDWSANSISTLKNVPEHVSPGQAIWTPDGNGVVFVGQNQKPERLGLIYCPIRNNRLYHIALGESKMAFPLTLEGLSVRSPRFSIDATKLVYLETEVGGPHFKTSRLMMIDWTSQMKNSDVLIDVPSDVKDGHFPGIYCQRLPRRCWSADSRRVFFSSIWRSTQQILCVDVEQKSVVRITNDAEV…	0.84
	A10, 11, 17	48	EZ761485	contig19251:1970:2808:2|similar to T-complex protein 1 subunit epsilon (P80316)|Evalue: 5e-109	580	30483	10 (8)	44.8	279	6.02	MDAVGHLVFDEFGKPFIIMKDQGKKRRLTGIDALKSHIIAAKAVSSVIRSSLGPRGLDKILVGPDGDVTISNDGATIMKEMKPSHEIAKLMVELAKSQDDEIGDGTTSVVVMAGALLEQADTLIDKGIHPIRIADGYEAAAHLAVKHLDEIAETYTFSKDNLDPLIETAVTTLGSKIVSRFGRQLAEIAVQAILAVADLERKDVNFENIKIVTKVGGKLEDTMLIKGVLVDKDFSHPQMPKLIKDAKMAILTCPFEPPKPKTKNKLDIVNVEDYQKLRE	1.29	2.69
	A5, 4-14, 17	23	EZ761932	contig21858:1:970:2|similar to Spectrin beta chain (Q00963)|Evalue: 4e-68	580	38860	13 (12)	37.2	323	5.49	ERYQSNRDRANSIGQRLRDARDLQQYLRDGEELLEFIHEKRIQVEDESYRTARTAHQKWTRHQAFEAELAANRARIDEIIQEGEELIRQKPQFTNEVRRSLDEITXQWDALERATRDKGEXPLDANRQAIYEQTVEDMDNWVQEIETQILTTETGQDLTTVNILMQKQQVFXENQMQMKAAQVSELERHEQKLHEIIPEKTDELRAKRAEVEEKLRRLQQPLEHRRRELEKKKEAFQFLRDIDDERYYIHQKMTQATNANXGNNLFEVLRMKKQNQTLRTEVENHEPRINAIIETGRRLITENHPERAHFEDLVEDLHKRWVD	1.67	7.96
	A12, 11, 15	46	EZ761236	contig18162:1:459:2|similar to Elongation factor 1-gamma (Q4R7H5)|Evalue: 1e-52	580	17990	15 (8)	58.6	152	4.69	DEEMDAADAALAAEPKQKDPFAELPAGTFNIEEWKRTYSNEDTNTVALPYFWDKFDKENYSIWYCEYKFPQELTKVFMSCNLITGMFQRLDKMRKHSFGSMCLFGTDNNSTISGVWIWRGQELAFKLSDDLQTDMESYNWQKLDPNDPKTKK	5.64	7.19
	A13, 14, 16	35	EZ762300	contig23569:1:798:1|similar to Cathepsin L2 (O60911)|Evalue: 7e-27	578	29673	15 (10)	49.4	265	8.84	SGKTRKLKDTIAGKPIDDYGPRKYAAFTAGSARDTGAVDLMATGMVQTPAYKQDPCGSCWAFTGIAVLEAHYFLRKGKKVKLSEQYVRDCAYDRKYYAASQPRQSCDGAFLYTVFQLASEAAIPETTAYPYIADEQQRQCPPSIKSLHNINVTDIVRVDGDDKMMAALRSVGPLAVSMNADEIANSNEWFFWDGLKPSVYVPKSCPSQVNHAVTLVGYGTDAKLGPYWLIRNSWGPTWANKGTFKIKRGTCGISYGLYPCIDGKC	2.22	4.65
	A16, 14-19	23	EZ760361	contig08851:1:613:2|similar to 60S ribosomal protein L7 (O01802)|Evalue: 4e-82	577	23750	21 (14)	62.6	203	10.59	KRQIIFKKAEQFVKEYRAKERDEVRLKRQAKKGDNFYVPAEPRLAFVVRIRGINGISPKPRKVLQLFRLRQINNGVFVKLNKATLQMLKLADPYIAWGYPNLKTVRDLVYKRGFAKIDQRRQPLSDNAMVEKVLGKFGMISLEDVIHEIVTVGPHFKQATNFLWPFKLNNPSGAWRKKTNHFVEGGDFGNREMKINNLLRRMI	8.4	13.27
	A17, 8, 19	14	EZ759027	contig00699:168:944:3|similar to 14-3-3-like protein D (Q96453)|Evalue: 9e-84	577	29358	30 (10)	42.2	258	4.76	MAETDRDTLMFAVKLAEQAERYDEMVAAVKELLDVVDGELTLDERNLLSVAYKNITGSRRASWRILSSVEAKEESKVGSGATTSMKLEQTRQLRQKIETEMRDICNEIVQIIDKQLLTATDNGEYKVFFHKMKGDYYRYLSEFTSGSEKREVSDLALGAYRTATEVASNKLAPTHPIRLGLALNFSVFYYEIMGSAERACKLARTAFDDAISELDNLNEESYKDSTLIMQLLRDNLTLWASDGTEEKEMNGLMEPDNQ	2.64	2.99
	A12, 4, 11-13, 16	47	EZ762274	contig23473:1:954:3|similar to Spliceosome RNA helicase BAT1 (Q3T147)|Evalue: 6e-119	576	36246	14 (12)	35	317	6.49	AGTVTLCCHYSFSFVCHFHIFRSLRTHAKMAEEEILDYEEVETEGDDVAEMASNGGAVSMAGDKMEGDTLQTTTKNAGYVSIHSSGFKDFLLKPELLRAIFDAGFEHPSEVQHECIPQANLGMDVLCQAKSGMGKTAVFVLSTLQQLEATDGQVSVLVLCHTRELAFQICKEYERFKKYMRSVRVAVFFGGLPISKDKEAIAKGVPHIVVGTPGRILALSREKAFNLKTIKHFILDECDKMLSQLDMRKDVQEIFRMTPKEKQVMMFSATLPKEIRPICRKFMQDPLEVIVDDDAKLTLHGLQQHYLKLKESEKNKR	1.85	2.52
	A19, 16-20	10	EZ762058	contig22582:74:622:2|No Annotation	576	20526	56 (9)	51.6	182	8.22	MKVAIALLAIIGAVLAAEGDNVSQARQMMAMRILTADVSQMKDCRADPTNACKESAIGKADWQCQDLMKLCAPANAPKMEGTEGTCTGTTDCRPLFRCGSGKCHFVGPRACEAASDCPTVEGLSFECKELPKNAPGKRCWMKCKNDGDCHGCTGDKCRIPAQFQSKIGCCGGFCQRKTECTA	8.71	15.08
	A16, 15-18	24	EZ758910	contig00053:1:856:2|similar to Enoyl-CoA hydratase, mitochondrial (Q8BH95)|Evalue: 2e-96	575	31344	18 (11)	48.6	284	8.5	VCRSGQTRFYAANTQSTEGQTSSGLGSFEYLIVDVKGQNRNVGYIQLNRPKALNALCTPLMRELSAALDHFDESNAIGAIVLTGSTKAFAAGADIKEMEDRKYPEVFRSNFLCGWDRVSQNRKPIIAAVNGFALGGGCEVAMMCDIIYAGDKASFGQPEINIGTIPGAGGTQRLVRAIGKSKAMEMVLTGNRISAEEAERAGLVSRIFPADQLVDEAIKLAEKISAQSRFASILCKEAVNQAFEMNLRSGLNFEKRLFHSTFASHDRKEGMSSFLQKRQPQYQD	2.36	4.17
	A14, 14-16, 18	32	EZ762896	contig25843:96:1024:3|similar to Eukaryotic translation initiation factor 2 subunit 1 (Q5R493)|Evalue: 4e-88	574	35454	12 (10)	35.9	309	5.26	MPITCRFYAQKLPEIEDVVIANVRSIQEMGAYVDLLEYNNIEGMILLSELSRRRIRSINKLIRVGRNEVVVVIRVDKEKGYIDLSKRRVSPADIIKAEEKFAKAKAVNSILRHVAEVLNYRTDAELEDLHWKTAWYFDEKYKKQASSYEVFKHAVTDPSILDECELDPKIREVLISNIKRRLTPQAVKIRSDLEVSCYGYDGIDAVKEALKAGLTLSTEESQIKINLIAPPXYVMTTTTLERADGLKLLEQALLLIKEKIDTYGGRFNVLMQPKVVTDTDETALAKQLEQLELANREVAGDEEFDEDMP	1.45	3.42
	A8, 7	51	EZ760729	contig12096:1:1521:1|similar to Vitelline membrane outer layer protein 1 homolog (Q7Z5L0)|Evalue: 3e-12	574	56710	12 (10)	25.6	507	6.1	CIHTLQMEKREIHLQTILFLLFTAWRCYAVDAPRVTDSEAWLKGGNKSITIGSEKHGTWRDPDFCAPGMFAYSMKLKLYRGQTKDQVGVDAVQLSCAPLGAFSEPFSTVVSYSGIWGDWGPDFSCEAAVMIGAIGRVLDTGSDQAGLTNLKMRCSNKKLLEGDGLALGDWKPEQRCEKGYAVCGIRALFQESQHGRGGKDDTSLNAVTLYCCPVKVNNCKPKDNWVTVMRCDNSKSGLNSTCKYEQQTGTVTVGASASSKSKEQETVYSQTMGIEAGSGILGFQAHFSEKIGKSSSTGFDWTTADSRTFSKVTTTSVEYLVSPGKIKELRQVIGQCGDTIVATSSFETFERDPVKTPPQNLPAPPIDSNNTESKTDDDVYDASSEWKADGSKALYVGWG…	0.97	1.3
	A10	50	EZ762906	contig25889:181:1761:1|similar to Insulin-like growth factor-binding protein complex acid labile chain (O02833)|Evalue: 2e-23	574	58936	13 (12)	29.7	526	8.77	MAAKRVVCDRGGVSIPETLTLSALDRDTETLIITAPPDRPNQLRLTPQMFKDMKLQELHITHSNLESSVMQYLFYHISPTLRILNLANNDLASIHENYFRNLSGLTHLHLNHNRIGSVYSAMFTYLKSLRLLSLSHNRILDIPARFLLQQSNLQNLDLSGNPIGTVGFDGVRGKIPATLFQDVPNLQKLNLANISVDTIPFAAIGQQNLALIDIDVSGNRFTNLSDNQFNLIKSLKRISIGGNPMTSFKAGALRGLDLEYLDLSHLNLQNIPSQMFSGAKVRTLNIGFNGIARIEPQSMVEIARDLEGLDVSGNTQLDLVEKMFEFLPNLRSLSVSYMGLNRFPRNFFHNDHKIVMLNVSNNMFTELPEDKIPVLPKLEVLDLSNNRLRKLPARLGELR…	0.92
	A9, 8, 15	56	EZ759397	contig02679:141:2189:3|similar to Methylcrotonoyl-CoA carboxylase subunit alpha, mitochondrial (Q99MR8)|Evalue: 0.0	573	76229	9	20.2	682	6.7	MRQLEKYSKSRTSPQKRVLSKILIANRGEIACRIIRTARKMGIRTVAVFSDPDRRSLHVDMADEAYHIGAASTNESYLNQRRILDVALKSRAEAIHPGYGFLSQNPEFAELCEQNGVTFIGPSGDAIRDMGIKSTSKTLMEGAGVPIIGGYHGDDQSVERLKSEAKKIGFPVMIKAFRGGGGKGMRIAESEEVFEAQLESAKRESMKSFGDEAMLIEKYAQRPRHVEVQVFGDHYRNYVYLFERDCSVQRRHQKIIEEAPAPGLSPETRRAIGEAAVRAAAAVDYVGAGTVEFILDSQQKFYFMEMNTRLQVEHPVTEMITDTDLVAWQLKVAAGDPLPLSQEQLQMRGHAFEARIYAENPADNFMPGAGPLKHLSHTFSADSTVRIESGVRQGDDVSV…	0.46	0.68
	A15, 16	28	EZ758957	contig00328:121:1038:1|similar to Mitochondrial import receptor subunit TOM40 homolog 1 (Q9U4L6)|Evalue: 2e-90	573	33055	10 (9)	36.4	305	9.32	MASITRGMEAPSVAKAALQNPGTFEDLHRRAKDIFPMNFEGLRFMLNKPLSNHFQLSHTINIGQMQSGYRFGATYAGSMMSSPSETYPILVGEIDPTGNLNAQIIHQFTSRLKTRLIAQYDEGKLAASQFSSDYRGPSYTASLTLGQLDIRRSSGIVVAQYLQSITRNLSLGSELLYQKGSQIPGGQISVLSVGGKYTGSNFIAAASVGASGVHLSYFHRCNDQLQVAVDMDTSLRSGESVGSIAYAIDVPRINCTFRGSLDTNWNVGAVLERKLFPLPATLALSALINQKKHASQFGIGLMIGA	1.36	1.97
	A17, 16-18	16	EZ761749	contig20585:208:981:1|No Annotation	573	29069	19 (13)	54.5	257	6.98	MLPKSVLLFLCIAAAKAAVFQFNHPTDLEPACAAVIKPAKCSLVCGKSSATVAISCTEGAKPTDIKKLIGDTVRVNSEKRAMSVNLYDVDTTAGMFDDGKTLIKYLEFVRGAFDSAHIRSLAVLAHLKLSDGTAAFRAADLDTLPKLDAIWMPNTLFTTFSISAKKVDQLTHIDMDRYDWDTRSEADIIKSMKMTHCDCESKDFRKGIRANWAQRWGPDLTYSGMHNIVDCNKMNKADLLNFPMDNYEIRFSVNDCQ	3.56	3.78
	A15, 13-19	29	EZ760178	contig07385:1:906:1|similar to 40S ribosomal protein SA (B5FXT6)|Evalue: 5e-100	573	33819	26 (10)	45.5	301	5.93	KRSLNPVSKMANDILNLKQDDAMKFLACNTHLGSQNVDHQMQSYVYKRRADGIHIINLKKTWEKLVLAARAIAAVEDPAEVFVISSRPYGQRAILKFAVHTGATPVAGRFTPGTFTNQVQKAFREPRLLVISDPRSDHQPVREASYVNVPVIAFTNTDSPLRFVDIAIPCNNKGAHSIGLMWWLLAREVLRIRGMSRDEPWKIMVDLFFYRDPEEIEKEDQATADKNVVPRETSTYAADWVAQTADNVAQPFVEDVKDWAAEPITGYQGGAGANEWTGNAEWEQQNAAGNEWGGAATESWK	2.7	7.07
	A9, 16	57	EZ759018	contig00643:105:1985:3|similar to Signal recognition particle receptor subunit alpha homolog (Q9U5L1)|Evalue: 1e-162	571	70740	11	25.9	626	6.25	MIDFFTIFSKGGIVLFYFQSTSGFFLNSVNSLIRSVLLEERGGAQAFTHENLQLQYKLDNEFDLVFVVGFQKILGLNYIDKFLSEIQLRFRDEYKSAQLELANGSQNYKTFEKTVQKLLREAEEEEREVLNKPKQMKTFQDSEKSKKTVASLIEKRNGEDFTKKAKDKKDKATDKVAQSAVLEESSRANVAVTSDDDEIKKNRKKLFERLEPTSPKAKPKNNEKKPKQARTWDNGGRNSKPLDYSKDKDQNAQTEANTENINFNIKGEMKGELRDIDENESDEEFEDDESSEEEVKSTKKVXKESGGQERWFWVYVLSVQRTRGFKTIVADDLTPVLELLRIKLMEKNVAAETADKLCKSVGEKLEGRVLGTFEGLNSTVRTALGDALTRILTPKKPIN…	0.65	0.7
	A7, 7-11, 14, 16	43	EZ761791	contig20824:1:778:3|similar to Staphylococcal nuclease domain-containing protein 1 (Q7KZF4)|Evalue: 1e-65	571	29144	15 (11)	53.1	258	5.16	AKETCVINFILCGISCPKGSRLGPNDVVMEAEPXGEDAMMFSKEMCMQRDVQVEIESMDKVGNFIGWMFVDGQNVSQALVENGLAAVHFSAEKSPYYTALQKAEAAAKAKKLKIWSTYVEPTEAEAEPDDDKTERKVNYKKVVVTEVSPGLKFFIQEVDRGVQLESLMNDIRQEFQSHPPVIGSYKPRRNELCCAKFSADGQWYRARVEAAQGEKLQVLYVDYGNRETITTASVAQLAAGFQRLPPQATECALAYVKE	2.65	5.07
	A11	53	EZ760469	contig09642:410:2035:2|similar to Succinate-semialdehyde dehydrogenase, mitochondrial (P51650)|Evalue: 5e-140	570	58924	10 (9)	21.8	541	7.62	MLRTAISLSLRRINPVITAHHLPVSAVVTDHSNTPSVGPGVSRQMATQASLKSARYDQFMESATLIREKDLLNGEWVQMSKTFEVRNPATDELIATVPDCSQKEVHSAIEAAHRAFQTWRDTTPKERAIVLRKWFDLITKHTKELAGIVTAENGKPLAEAEAEVASGASFFEWYSEVARHVNGDIIPAPDKKRQFMVFKEPVGVVAMITPWNFPSSMLARKVSAAVAAGCTCIVKPASETPLSALALAALGEEAGLPKGVINVITTKDHAMVGQTLCESPTVAKISFTGSTNVGKLLMKQGSSTMKRLSLELGGHAPXIAFDSCDVDAAVEAAVFSKFRGSGQTCICTNRVLVQDKIYDKFVDSMVTQVEKKMKVGNGFEDXITQGPLISEKAVEKAES…	0.72
	A9, 10	58	EZ759354	contig02428:204:2093:3|similar to Arginyl-tRNA synthetase, cytoplasmic (P54136)|Evalue: 0.0	570	72623	14 (12)	21.5	629	7.28	MAQSEDATLDAMASANAHTKFRLAHLKQSVKAAAIRAADKNPTTVKHLEAIFHVAILSAYPHIDQVPTSIQVCEPKYGDYQCNSALQIAQWTKKGGKAEKPVDIATKIIANLPINTLVGETKIAPIGFINFTLQPNYVSQKLTDLLRSRFPAPHLERRLRVVIDYSSPNIAKEMHVGHLRSTIIGNSVARLLTYMGYDVLSLNHIGDWGTQFGMLITHLKDKYPDYKTVMPPLQDLQTFYKESKVRFDEEAEFKKRAYDAVVQLQKHDPDVLKAWQLVCDISRRELHKVYERLGVHDLTERGESFYQELMGDVVKQIDEKGFLQMDEGRKIMFPPNAQIPLTLVKSDGGYTYDTSDMAALWHRLKVENADRILYVIDNGQELHMQICFKGAQQMGWYDP…	0.78	0.92
	A14, 13-15	33	EZ762900	contig25872:119:1225:2|similar to Pyruvate dehydrogenase E1 component subunit beta, mitochondrial (O44451)|Evalue: 1e-135	570	40625	16 (11)	39.4	368	6.12	MTGRNVLLQVSRCLLFKRNLSTSFVASAAQTQQKSQGKQMTVRDALNSALDEEIERDQRVFIIGEEVAQYDGAYKITKNLWKKWGDERLIDTPITEMGFAGLAVGAAMAGLRPVCEFMTFNFAMQAIDHIINSAAKSQYMSAGLVRVPIVFRGPNGAASGVAAQHSQCYGAWYAHCPGLKVVAPYSAEDCRGLLKAAIRDDTPVVFLENEMLYGVPFDMSEEAMGKDFVLPIGKAKVERQGKHVTIVSFSRGVQLCLEAAQELEKQGIDAEVINLRSLRPLDMESIVNSVKKTNHLVTVEQGWPHCGVGAEISAGIVESPAFDYLDAPIYRVTGVDVPMPYAKTLEINALPSTKDIVSTVQASLNMKK	1.56	2.12
	A17, 16-18	17	EZ761906	contig21632:1:563:1|similar to Superoxide dismutase [Mn], mitochondrial (P09671)|Evalue: 3e-44	567	20772	16 (9)	50.8	187	5.97	AEQWFIGKIAIFIADFISFSSGFPHKNDETTEQSATQRALXXQMQSVASASKGSAGFTARYTLPDLPYSYDALEPVISAEIMKLHHQKHHATYVQNLNTAEEKMSVALQEGDLETAIELQSKIKFNGGGHINHTIFWKNLSPEAGKEPSGDLMQGIRRDFGDFDIFKKVMSKRAAEIQGSGWAWLAL	3.48	4.95
	A9	59	EZ761244	contig18200:1:1065:2|unnamed protein product [Microcystis aeruginosa PCC 7806] (GI_159026529)|Evalue: 7e-53	564	40106	13 (11)	36.2	354	5.46	AHTTASHTVNMAAKTKEAKYGTWISPITSQVASGSAVNFGGLERDASRKNPSKLMYWLEQRPAEEGRNVICSYEPDTKRILLWTPGEFNVKTKVHEYGGGAWCVGEGTLYFSNKKDNRIYKQTAAAEMPQPLTKEDSARRFADLSYSEEFKCIYAVCEDFAERGTDIDARDKVTETFTARQIPDNYIVAIDINSGELRCLVFGADFYASPRVSPKGKLAWLEWNLPYMPWDDTRLRYAELSADGRSIASAKSIDVKSTAKQTSFMNPEWSANESLVYISDENNYWNLYIQQEDGSSKHLNTHKRREVGDPLWVFGMHPFSVALRSKEEEIEIVVITDGELGLLTLGRDGASQPS	1.39
	A10, 11	52	EZ763183	contig27476:119:1849:2|similar to Glycerol kinase (Q63060)|Evalue: 6e-152	564	64042	14 (12)	29.5	576	6.58	MEHVRPTEETQARHSPPRNESEDVLIGALDEGTGSVRFIVFNSRHETIASHQLEIKKIHPEPSWVEQDAMEIMENSYTCIRNTIEQLQSKNIDISRLKGIGITNQRESTVMWDKTTGRPLYHVILWSDNRTADLASHLIHTKGKGDRFCLQKSCGLPIHPYFSGLKIRWIMDNVPTVKEAISENRCLFGTIDTWVLWNLSGGRQSGVHKTDVSNASRTMLMNLHTLQWDDKLLAFFGIPKSILPEICSSSELYGYLKGDNLPALPICGILGDQQAALVGHNCFEAGKVKNTYGTGCFLLANIGTKPQISSSGLLTTVAYKLGTNAPAVYALEGSVAHAGSLVNWLKNNLTLISSPEELETLAKEETDSGDVYFVPAFSGLFAPYWDTQARGTICGLTEY…	0.92	0.97
	A12, 11-13, 16	49	EZ761011	contig16973:1:1246:2|similar to Proliferation-associated protein 2G4 (P50580)|Evalue: 4e-96	564	45899	15 (11)	23.9	414	7.96	LIFKKEKELKKGIAFPCCISVNNCVCHFSPLKSDPDVILKNGDLCKIDLGAHIDGYIALNGYTTIVGASKENPISAKKADVIHAASTAMNAALRLMKGGVENTKVTEAIQKSAEAYKCKPIEGMLSHQLYRNQFEGKKSIIQNPSDSQKLDHEKSEFGVNEVYALDIFVSSGEGKSREQDTRTTVFRKSGESYNLRMKASRAFFSEVLQKHDVMGFNLRHFEDEKKARLGLSECINHGLLHPFPVLYEKEAEFVAQFKCTIAITATGVQKISGLSAELEPYKTTHKVTDSSLKETLNAATKTNKKKKSKAKKAVQEMTDAVAKLTTDEKDQHASDEEQENQETVRDVXEVTGPARTGLGPTFGPVFSRTDCWADAHSSGMAXREASELVSDVCGWSVVC…	1.3	1.59
	A19, 18-20	12	EZ759180	contig01555:212:841:2|similar to S-crystallin 4 (P27012)|Evalue: 3e-25	564	24208	20 (11)	48.8	209	6.43	MATYRLHHFDSRGRGELVRLMLCYAGVDFEDIRVQSGQWSQLRSLTPFSTLPVLEFDGMQLGQSMAIARMLADDLNMTGKNNLGKALVDSVADTADEILSDTMRIHFETNEKRRKDLTQKLLEYDLPRTLSNLDKFKEQYSNGYGYIINNNLTYADLAVYNALDHLLSTGLTNWTFLERYRYPSELRKRIFDGEPRVALYLKNRPPNIL	3.15	3.59
	A9, 8-20	60	EZ761113	contig17622:1:709:3|similar to Polyadenylate-binding protein (P21187)|Evalue: 1e-99	562	26530	12 (10)	55.7	235	9.36	TRRSLGYAYVNFQQPADAERALDSMNYDIVKGRPIRIMWSQRDPSLRRSGVGNIFIKNLDKSIDNKSMYDTFSAFGNILSCKVVATDETGSSRGYGFVHFETEEAAQNAIAKVNGMLLNGRKVYVGRFIPRAERERALGEHPRKFTNVFAKNFGDELDDDKLLAMFEPFGKILSHKVMSDENGKSRGFGFISFENPDDAEQAVLAKNGTPINNGTLYVGRAQKKAERQAELRRQF	2.27	8.59
	A7, 2-10, 12	45	EZ759476	contig03085:1:685:1|similar to Calcium-transporting ATPase sarcoplasmic/endoplasmic reticulum type (Q7PPA5)|Evalue: 9e-98	562	25529	17 (13)	55.3	228	8.79	HKEFTLEFSRDRKSMSAYCTPVGKASKGMSSGPKIFCKGAPEGVLERCTHVRVGTQKVAMTPQLKVKILELVKQYGTGRDTLRCLALATIDEPMNPKDMDVADSTKFFKYEKDMTFVGCVGMLDPPRKEVFDAIQLCKRAGIRVIVITGDNKLTAEAICRRIGVFGENENTEGLSYTGREFDDLSLAEQRSAVLRARLFARVEPAHKSKIVEFLQAAGEVTAMTGDGV	3.94	10.58
	A14, 13-19	34	EZ762036	contig22479:1:399:3|similar to Tropomyosin (Q95VA8)|Evalue: 1e-38	560	15276	20 (11)	58.3	132	4.71	NRKVLEVRSITDEDRAALLETQLAEARLLAEEADRKYDEVARKLAMVEADLERAEERAEAGESKIVELEEELRVVGNNLKSLEVSEEKALQREDSYEEQIRVLTTRLKEAETRAEFAERSVQKLQKEVDRLE	8.05	19.98
	A16	25	EZ760405	contig09211:109:1023:1|similar to Calbindin-32 (P41044)|Evalue: 1e-32	559	34506	13 (10)	35.9	304	5.07	MGAKSSKVSKELNQVVKDSVLDLDPDDFIKIFKTYDQDGSGTIEGKDLDHFLVDFVTAGSKGRFDATDPRSSDSLKSLRKNFLDEYDRNHDEKIEFKELAELLPVXKKKFITLFRFYYSLSSSADFMKVWLKYDKDRDGTINITELTALVWDLVQNSKSGPVKFPEHHIGAYINGIMSGCDANADGRLNIAELAHFLQPENNKLIDLAKLINSPGSGNRTYVDEVLKNYNPNEEAFIGPEELLAFVKDLFELRGITDYTVDDLNRAKDNLLMNVNVNADGKVSSWALRDLLRVIERNVEGLNRY	1.74
	A11, 10	54	EZ761269	contig18325:113:1433:2|similar to Programmed cell death protein 4 (Q98TX3)|Evalue: 1e-56	559	49028	14 (10)	31.1	440	5.28	MSSTADSLNARKAYGRSNSRSKEQEEVDTIIEQLSASSKHADTSAGAADSGLGSSVTTPLEETTTAIGGVHLDAADAAAAHRKGRGKRHQIGREPLSNGGALNAAARRGVSYGKNSRKARNGVGRGVAKKGGAGGKGVWGXXIGDELMEYEEDAQDPNYESDGEGKVALKSNEITKLEDLREKLQPIFLEFYDNCKAEETLNSLEELIIKPSLWHMIAYVAITVSMDHKAKDRELTSVFLAECYEILLAEQHFERAFDELLKDLPDLILDCPEAPQILGNYIARCIADDCMPPKYLQLRHEQYAAATDKREKELASKALEHAQVYINMKHGLVRLDNVWGVSGGIRPVKHLIKKMNLILKEFISSSGDVMEALRCLEELEVPHFHHEFVYEALLLAIED…	1.18	1.32
	A7, 6-12	46	EZ762001	contig22266:1:2016:1|similar to 2-oxoglutarate dehydrogenase E1 component-like, mitochondrial (Q9ULD0)|Evalue: 0.0	558	77059	13 (12)	25	671	6.86	DVKYHLGLSHTRINRVSNREIQLSLAXEPIAFRGRRPVVQGKTAQNSSILTIAKEEKVMSMILHGDAAFLAXGVVYETFHLSELPDYTTHGTIHVVVXIPGWLTTDPRFSRSSPYCTDVARVVNAPIFHVNADDPEAVQHVSNVAAEWRATFHKDVVIDLVCYRKNGHNEIDXPMFTQPIMYKKIRQMKPVVQKYAEKLIGESTVDENYYKTETESYSKILEDSYKNAAAITNVKYRDWLDSPWEGFFSARNPDVIEPTATDEQTLRHIAEVFSSHPADFVVHRGIARILAGRRDLMEHRMADWSMGEAFVFGSLVKEGIHVRLSGQDVERGTFSHRHNVLHHQDIDKTTYRPLSHLWPDQAEYTVCNSSLSEYGVLGFELGFSMVNPNALVIWEAQFG…	0.65	1.04
	A9	62	EZ759627	contig03867:1:1472:3|similar to C-1-tetrahydrofolate synthase, cytoplasmic (Q5R8P0)|Evalue: 0.0	557	53867	9	27	489	5.95	VTAATNLVAAAIDARILHEGTQKDDALYRRLVTEKEGQRQFSDIQLRRLKRLGIDKTDPSTLTKDEISRFVRLDIDTHTISWNRVMDTNDQFLRQITIGLSVEKEKRIPARQTQFDITVSSEIMAVLALCTSLADMRERFGKMVIGNSKTGEPITVDDLGVTGAVTVLMKDAIQPNLLQTLEGSPVLVHAGPFANIAHGNSSVVADLIALKLVGPQGFVVTEAGFGSDIGMEKFINIKCRVSGLKPDAEILVCTIRALKMHGGGSAVQAGTPLPKEYTEKNVDLVKKGFANLEKHISISKRFGLPVVVAINQFATDDEEELEIVRRLSLEAGAADAVVCSHWANGGWGAAELAKSVVRATECKNQVEFLYDLRLPLDEKMRAIAREVYGAKDVSFTNEA…	0.71
	A11, 4-6, 9-12	55	EZ762895	contig25841:75:1310:3|similar to Reticulon-4 (Q9JK11)|Evalue: 9e-27	557	46428	14 (12)	35.9	412	5.58	MDNYDDDFTGNSSTKRRSDAFQEERMHIRGATDHSSDVTSGQSHVNDMIYNFQHMNDHNIRESDTTDTAERNRQPYDYSEDSLVRETHVSPVEVVTSGSRIMDSERSSASDRPLTIRNMSTTSDDHSATTEHIRSSQRDSDLISSRVSTNVSDYRNIYEEKIGTGQSSTGQTFSDQTTTGQTQSGHSNAGRISSGQMNSGERVSDSVTSYESSGQAKPMSPMSEFDSDRRRMESQMGSKAGRRTRPLGQHIKDLVMWRNPAESGALFAVGTALLFCLSYYSIISIFAYTSLILLGLVMSFVLYSQVMHTVQQQPTHEHPFKRLLESEVVLSPDYAHQTVDAMIRPINQMAVGVRNLYLADSYGQTLKLAAIMYLLTYIGSWFNLLTLIVMLWVSAFTLP…	1.28	2.66
	A15, 13-15	30	EZ761232	contig18143:1:1164:1|similar to Sorbitol dehydrogenase (Q4R639)|Evalue: 2e-118	555	43441	15 (11)	38.2	387	7.99	KQCSQICICKNCQSSHCHLLLCLFTHQLEPRNQLKMGRDMNLSVVLYGKNNMRLEERPIPQPSRHEVQIQMNAVGICGSDVHYLVEGKIGPFVVKSPMVLGHESAGTVSAVGEGVKHLKPGDRVALEPGYPCRMCIYCKNGRYNLCTDMVFCATPPYHGTLTRFFVHPADFCYKLPDHISLEEGAMLEPLAVAVHACNRAGIVIGSRVLICGAGPVGLLNMMCARAMGASRICVTDVNEARLEVAKQLGADFVMPVSGKDARHLSCEITGLLGAQPDVTIECSGAEASVQLGIYATKSGGCVVIVGMGADEARIPLMSAVVREVDIRGIFRYANCYPTALELIASHRVNVKPLITHRFPLEKAAEAFEVCRTQADNCIKVMLNCTKE	1.79	2.54
	A12, 11-13	51	EZ762745	contig25236:33:1556:3|similar to Fumarate hydratase 2, chloroplastic (Q9FI53)|Evalue: 0.0	554	54848	13 (11)	29	507	8.39	MSFSVAKLLALFQQTSLKTTGQCGRSLSYSCTKMAAQNGGDTNSVGFRLEKDSFGELQVPNDKYYGANTKRSMMNFDIGGESERMPAPVIAAMAVLKKASAEVNMGFGLDQKVAKAIMAASDEVIRGQLDEHFPLVVWQTGSGTQTNMNVNEVISNRAIEMMGGKLGSKSPVHPNDHVNKSQSSNDTFPTAMHIAVALEINHRLLPGLHQLYEALNAKSQEFSDIIKIGRTHTQDATPITLGQEFSGYATQIKNAIHRVKAILPHVYELAAGGTAVGTGLNAPIGFAEGVAQTIAKYTGLPFVTAPNKFEALATHDALVNCSGALNTVAVSLMKIANDIRFLGSGPRCGFGELSLPENEPGSSIMPGKVNPTQCEAVTMVAAQVMGNHVAVSIGGSNGH…	0.9	1.75
	A6, 4-13, 15-18	27	EZ759017	contig00641:1:549:1|similar to Myosin heavy chain, striated muscle (P24733)|Evalue: 3e-50	553	21089	15 (10)	53	183	7.88	MMDAARLADELRQEQEHAMNVEKARKGLENQMKEMSARLEEAEASALKGGKRIIQKLEERVREIESELDSEQRKHAESEKNIRKHERRVKELQFQGDEDKKNYQRLQDLTDKLQQKIKAYKRQIEETEEVASMNLAKYRKLQHELEESDQRADIAEQTVSKLRAKNRSGASAAPSSPAAGGKS	5.82	34.33
	A8	53	EZ762657	contig24849:397:2201:1|similar to ATP-dependent RNA helicase DDX1 (Q5XH91)|Evalue: 0.0	552	68016	9	20.6	601	7.14	MIAIQIWRLTNKESFVKVDMDNWQGCRATKGLINRGKYYYEATVTDEGLCRLGWSSLYGSRDLGTDGYGFGYGGTGKKSNNSQFDSYGEPFGKNDVIGCFLDIDQNTIKFSKNGVDFGNAFQIGQNLRNSPLFPAIVLKNAEMRFNFGETPFSFPPPGGYVACVQAPQDCLVSYEQISSKMIKSSQKQRQLNAPLGLIIEPTRELAEQTTSLFTKLKKYLKEPSVKEVTLVGGDNRDVSDALRNGVDLVCGTPGKLREMIFNGSLQLDNILFFVLDEADGLLSQGHGGLITEIHSKIPKQSSGGRRLQMIVCSATLHNQEIKRLADKIMRFPTWIDLKGQDTVPETVHHVVMPVDPQTDLSWQRQDIRQRITTDGVHSNDRLNNNQSTPEMLSEAVKIL…	0.53
	A6, 7	28	EZ759403	contig02702:1:1654:2|similar to Valyl-tRNA synthetase (Q04462)|Evalue: 9e-157	552	63721	10 (9)	20.5	550	5.5	LENIRDWCISRQLWWGHRIPAYHVTVRGQPATDESDPKFWVSGRTYEEAFNRAKQRFNVSESDVTLKQDEDVLDTWFSSALFPFSVFGWPENTSDFDRYFPTNLLXDGHDILFFWVARMVMMSLKLTGKLPFSEVFLHSIVRDAHGAKXXVNRWGRIDPLDAIKGISLEELHNTLFEGNLDAAEIERAKAGQKQDFPEGIPECGLXALRFALCAFLTQGRDINLDVLRVQGYRFFCNKIWNAMRFSLMQLGENFKANLSFEVSQSTDTINLWILSRAADAIEQCNSGLKEYDFPKATTACYNFWLYELCDVYLECCKPVMSSDDEGAKETMRQTLYTVLEIGLRLISPFMPYISEELWQRLGRRSAQEAPSICVAEYPQIDKYSWRNESAESDIDLMMS…	0.65	0.87
	A12, 11-16	52	EZ761108	contig17588:59:1024:2|No Annotation	549	37396	26 (10)	37.1	321	7.55	MAFVAAERITQLDRESPQDNWERRHSVTSDPYDRYDRVTPKSYTSGYTFSWERDPTTRNWRDRDDDYGRHTTRSSYLNRGTTNWRDADDDYRRTTYRASYLDRYTTVRPGVAWDVDTDSFGRRTTSRWGASSWDRTTARSAYNPNEAYVNITAQLVKLHNDKGLTADGGKCDTFGQCDPICTAYLDTERPNSEAPGARDFKNWHKVLQIDDVNSPTFNTTISKEICGLPYREANLRVRCEDRDAATSNDLINIWSCPITRLPTDTESYASFSQITECIPKHQPKNANDMRLTFKYKIFSVPSWKCGESSSSSNTGRSGIRV	2.57	4.03
	A16, 14-17	26	EZ761229	contig18129:136:1026:1|similar to Cathepsin Z (P05689)|Evalue: 2e-100	548	33940	13 (9)	37.2	296	6.58	MKLFILITCLVISCAESKKHRGGCYDKSFDRHVKHVKTQPRPHHYLGTENIPESWDWRNVNGVNYCSPTRNQHIPVYCGSCWAMGTTSSLADRINIARKGAWPSTYLSPQNVIDCGNAGTCHGGGGLAVFEYAHKKGIPDETCNNYQAIDQPCKTFNQCGTCSEFGKCYVVQNYTLWKVGDFGPISGREKMQLEIWKKGPIACGIAVTEKFDAYTGGVYEEYNPSAGINHILSIVGWGVEHDTGVEYWIGRNSWGEPWGEHGYFRIVTSKYKNGQGDDYNLQVESDCAYADPIVPY	1.11	2.16
	A14, 13-15	35	EZ761876	contig21432:22:1311:1|similar to Crustapain (Q86GF7)|Evalue: 7e-34	546	49307	18 (9)	28.9	429	9	MTAVCSLRISSIKVNRSSFKNILFFDLSITVIESASSKESNXKKRLPQRKASVATLPLLSKMKLILCVLFAFAVFACCSCDDDKEWQIYKKENNLKYNTEEEEQSHKENYLETKQFIEEHKSKSQTRAGGEKVVLKLHGLSHLSKEERVKTLTGLAKNAGTRRLNNNRVPGKPVDNRGPVRYASLPAETASAMVNRDFVDWNARGAVITPSYSQNPCQTCWDFTGMAVLEAQYFLRTGKKVKLSEQFVRDCVYDPRYAATPGRPCDPAYLFTAYQLASEAAIPLAQEYPYMDDQFVRQCPVGMRGIMFNITDMVRPQGDEEMMRALRIYGPIGIAMDANELINSREWFNWNGISPSIYMPRTCSTQPNHAVTLIGYGTENGIKYWLIRNSWGPTWANNG…	1.32	2.32
	A10, 9-11	54	EZ762257	contig23424:1:726:2|similar to Glucose-6-phosphate isomerase (Q4R591)|Evalue: 1e-63	543	27103	13 (12)	54.8	241	8.97	SQFCIFHRTPSQFFACLLSSQLSSTFANMESRQSLKDENAWKALQELLRLNXGKSLKMRQLFESDKQRFEKYSITMKTPKDGEILFDYSKNITDDTVMKSLFDLMRARGVEKARDAMFSGEKINITENRAVLHIALRNRSNDAINVDGQDVMPGINKVLEQMKSYVNGIRDGKSVGFTGKKFTDVVNIGIGGSDLGPVMVTEALRPYASGLKVHFVSNVDGTHLAEVLKKVDPESTLFLIA	3.03	3.41
	A18, 17	13	EZ762104	contig22783:1:612:1|similar to Proteasome subunit alpha type-5 (Q5E987)|Evalue: 2e-82	541	22509	13 (10)	81.8	203	5.65	LGSTAIGIQTKEGCVLAVEKRITSPLLEPSSIEKIWKLDDHIGCAVSGLIADARTLVEKARVEALNHWFTYNERMSVESVAQAVSNLAIGYGTTLSRPFGVAMMFAGIDHRKPQLWHMDPSGTFIAFDAKAIGSGSEGAQQSLQEVYHKDLTLKEALKHATTILKQVMEEKINSINIEIATVTPDRWYHLFTVDEVEEVLKSV	4.28	4.8
	A19, 18-20	15	EZ762753	contig25280:381:983:3|similar to Isochorismatase domain-containing protein 1 (Q08C33)|Evalue: 1e-43	540	23058	11 (8)	50	200	5.99	MPPVPRLILDRTAFFLCDMQKRFRPSVRFFEEILEAANKLVKGSKIIGVPLVVTEQVPYPKGLQKTVDELDISHAAGVFEKNKFSMYVPEVESLMQTKLCDGKLQSIVLFGIECHVCVLQTALDLREKDYNVHVVADACSSRTQPDRVLALERMKQAGCVITTTETVLLELVDDKNHEKFEQIKELIKEPAKDTQLVLHY	2.38	3.94
	A12, 4, 5, 12-19	56	EZ762228	contig23322:1:889:2|similar to 60S ribosomal protein L4 (P49165)|Evalue: 8e-99	540	33578	14 (11)	44.3	296	11.48	RSTAKTHTFWFLFSSSVFRISKMSHVSARPLVTVYDEKNVSTGKTVPLPTVFKAPIRPDVVNFVHTCMRFNARQPYSVNDLAGHQTSAESWGTGRAVARIPRVRGGGTHRSGQGAFGNMCRGGRMFAPTKTWRRWHRKINVTQRRYALVSAIAATGIPALVMARGHVIDQLNEIPLVVDDKVQDXKKTKDAVNFLRRSRVWGDILKVYKSRHIRAGKGKMRNRRRVHRKGPVIVYHKDNGLVRAFRNIPGVDLLNVRSLNLLKLAPGGHLGRLCIWTESAFRQLDPIYGTYGQKSK	2.09	6.51
	A12, 11-16	55	EZ762911	contig25936:1:762:2|similar to Isocitrate dehydrogenase [NADP] cytoplasmic (Q5R9C5)|Evalue: 1e-70	540	28305	19 (12)	49.4	253	7.18	VAYGVIYTIRVGLPHTHSMNIPLRYKRTLLIVXTTVIDSQVSYAFSNSTVDVHVSSSKVLSTTVAAFAVTPLCISLLSNGVTENSSWTCGRSEGDEMTRIIWEKIKDTLIFPYVDMELHSFDLGIEHRDATDDKVTVDCAEAIKKYNVGIKCATITPDEHRVEEFKLKKMWPSPNGTIRNILGGTVFREAIICKNVPRLVPGWTKPIVIGRHAYGDQYKAKDFVVPGNGTLKISFAPSGGGQAIEETIFEFKD	4.93	6.36
	A10, 9-11	55	EZ763062	contig26660:1:991:2|No Annotation	539	32946	8 (6)	39.2	329	10.61	SGGSTVRGFSVSANRDERLWDRAKNAMRSIMGSNTDTTADGRSGPTNNTSTVKSGGMPGTSRTESNRPELAREAQFERDTSMAEGNRQSAAERQSNPVNATQSFNPRHDTRSQRPQETDQRKSTGSGTSAVKDPAPINTLPNTQASSGQNYGQSASAKSGSTSQSSGQSSGQSSGQSSGQSSGQSSGQSSGSQAXXPVKTSGQSSAAKGGQSSGGQASSGQSYGQSSSGQTGQSNRGQTSLGQDSGQSSTRSGLSGGQSSGSQATSGQTFGQSSAAKGGQSSGGQASAGQSSGQSGSFKGEQSSGAKAAASAHQRTSERKVIVKISVHN	0.78	1.21
	A17, 16-19	20	EZ762875	contig25773:1:614:3|similar to GTP:AMP phosphotransferase mitochondrial (Q9WTP7)|Evalue: 7e-42	537	23299	20 (11)	64.5	203	8.52	TELGKKVAAVMASGQLVPDDIMIALMQTEMKSVGSKWLLDGFPRTFAQAENLHKSIGMVDSVINLDIPFETIRKRIEGRYVHMKSGRTYNLEFNPPKVAGKDDVTGEPIERRPDDEPEVVMNRLKTYQERTEPLLSYYKKAGVLKEFQGTESNVIWPHVKKYLEEFMAKXAIGADRKLSAFVTDTIWCWFRIPLLHFSKQIPL	4.72	6.13
	A10	56	EZ761583	contig19764:122:1843:2|similar to Glutaminyl-tRNA synthetase (Q3MHH4)|Evalue: 0.0	535	66128	11	21.6	573	6.44	MAAAVADATSEAKTAAPIVDIMRRVNFHKPGENYKTDGYVTTPTTMSLLQKHLKETGGQIITRFPPEPNGTLHIGHAKAININFGYAMANGGICYLRYDDTNPEKEEEKFFTAIRDMVEWLGYEPYKVTHSSDYFQKLYDLAVELIKRGHAYVDHQRPEDMKGFNPPPSPWRDRPIHXSLFNFFEDMKHGMFEEGAATLRMKITLEEGKQDPVAYRIKYVPHHRTGDQWCIYPTYDYTHGICDSLENVTHSMCTKEFQQRRSSYYWLNNALDLYCPVQWEYGRLNVYYTVVSKRKIAKLIETKVVRDWDDPRLFTLTALRRRGFPAEAVNNFCALLGVTMAETALDPHVLEACVRDVMNASAPRTMAVIEPLKVVIENYPFEGPIQIDALDFPEKGESS…	0.7
	A10, 11	57	EZ762107	contig22788:1:784:2|similar to T-complex protein 1 subunit epsilon (P48643)|Evalue: 6e-116	535	29040	14 (11)	54.6	260	5.68	EQKKFDEMVQMVKDTGANLVICQWGFDDEANHLLLQRELPAVRWVGGPEIELIAIATGGRIVPRFEELSKEKLGLAGTVRELSFGTAKDRMLAIEDCPNSKAVTIFIRGGNKMIVEEAKRSLHDALCVIRNLVRDSRIVYGGGAADLWCANVVTEAADKVRGLEQYAYRSFADALEQIPLSLAENSGLQPIDAVSQVKSRQITEKNPRLGVDCMGRGTNDMKEQAVIETLIGKKQQILLATQLVKMILKIDDVRLPGEKE	2.67	3.81
	A18, 16-19	14	EZ763313	contig28250:1:790:2|No Annotation	534	29723	27 (8)	38.2	262	9.05	KTRTFKTHFSCRTFGFHFNRHYCGIHKMQRLLIAVTALMCVSLGFAQGPPDMGPGGGGPGMFGGGFPNLENIPNSQQLMMCAQPAIGFVFSQMGSMGPGGRQTLTREQFTQGCTVGRNLMQCLDSWAAGLTVPVSPDVRDLLKGANKIMEVCNEPNTYENVNRFKECGKKLEAAPNQCPEYKRSKERVQDKFKNADPLTILKEIKIMDDLCCGIKTVSPCVKGKIQSLCTPADLQFFQSTHDRINREFKCSTRTANCPAVTA	3.41	6.01
	A10, 11	58	EZ761469	contig19203:180:1808:3|similar to Methylcrotonoyl-CoA carboxylase beta chain, mitochondrial (Q8T2J9)|Evalue: 0.0	532	58923	8	24.2	542	7.18	MLHTPKFAQTGTSIDSNSDDFQRNDAAMRGLVEELRQHIARITKGGDDKSIHRHTSKGKLLVRDRIANLLDSGSPFLEISQLAGYNLYKGEEVPAGGIVAGIGRVSGIECMIVGNDATVKAGAYYPITMKKHLRAQEIAQQNRLPCIYLVDSGGANLPRQADVFPDREHFGRIFFNQANLSADGIPQVAVVMGSCTAGGAYVPAMADESIIVKNQGTIFLGGPPLVKAATGEDVTAEELGGADLHCSRSGVADHYAHDDMHALHVARRVVANLNIRKSVSLTVERPEEPLFAAEEIYGIVGADLRKTFDVREVIARIVDGSRFDEFKAKYGETIVTGFARLYGYPVGIIGNNGVLFSESALKAAHFVELCCQRGIPLIFLQNITGFMVGKDAEAGGIAK…	0.54	1.08
	A17, 16	21	EZ762578	contig24540:1:1008:1|similar to Regulator of microtubule dynamics protein 1 (Q4G069)|Evalue: 3e-53	532	38795	13 (9)	29	335	8.87	GTSIISALIRDSNEKQSIESHFQSIFRYISKSNFLRKRPEERRLLRYWNKDSSQSFRKIVEQLVVRSTSLLPSALPPTLVFLSAYRALFSVVTDTKFCKMSSEEAEIIKKADTLYEEGKMKELYDTVKIYPDSQNIEIVWRLARALFEMAKIAPNSDEKKKYTYDGLELCKKGLALDDKNSGIHKWYAIMLDEVGQFEGTKYRLEKSPEAKEHFEKAMEYNPKDPTNYYCIGVWHYTFADLPWVQRKLAATFFASPPTSTYAEALTWFEKAEGVKPGFYSMNLLYLGRSRIKTGDYKGAVEPLQKLSEFPAQNDEDKKAKAEGESLLQEAKKKST	1.09	1.27
	A18, 16-21	16	EZ761149	contig17747:86:712:2|similar to 40S ribosomal protein S8 (Q8WQI5)|Evalue: 1e-84	532	23782	17 (9)	49	208	10.73	MGISRDNLHKRRKXGGKRAITRKKRKYELGRPAANTKIGPARVHTVRVMGGNLKFRALRLDHGNFSWGSENTTRKTRIVDVVYNASSNELVRTKTLVKNAIVLIDASPFRTWYEGNYGIPLGRKKGAKLSEVEDKNLNKERKGKSLKRLQMRQKNAKVETPLEEQFMSGRVYACISSRPGQHGRADGYVLEGKELDFYMRKIRAKKGK	3.26	7.62
	A14, 13	37	EZ761990	contig22225:72:1087:3|similar to ATPase ASNA1 homolog (Q5TRE7)|Evalue: 4e-112	530	38174	11 (9)	43.2	338	5.18	MSELEREGMQSEAVPVDPTIQNILDQKSLRWIFVGGKGGVGKTTCSCSLAILLSQIRENVLLISTDPAHNVSDAFKQKFTKYPTLVKGFTNLHAMEIDPNVQGKQEEPDEMADESDDLWSAGRKMFLDITNALPGIDEAMSYAEVMKLIQDMNFSVVVFDTAPTGHTLRLLAFPDVFEQGLSKIARLKNRIGPLFTQISGMMGMPQGGSDFEAVSQRIDKLLPDIRKINEQFHNPEMTTFVGVCIAEFLSLYETERLVQTLAKHGIDIHNIIVNQLVYPSGGHPCSLCTSRKRLQQKYLDQITELYEDFHVIKLPLLEDEVRGADSLKSFSQMLLKPY	1.3	1.39
	A11, 10-12, 14, 16, 17	59	EZ761823	contig21053:1:646:3|similar to Serine hydroxymethyltransferase, cytosolic (P34896)|Evalue: 7e-82	530	24480	12 (7)	54.2	214	8.34	KVPRHNIMDMQKMDPSLVRPITEVDNEVYELMKAEKQQQINAISLIASENQTSRAVLDALSTALQNRYSEGYPGARYYGGQEVVDKVEKLCQRRALELYRLDPKQWGVNVQPYSGSPANFAVYTALVEPHGRIMGLDLPDGGHLTHGFMTDKKRISATSIFFESMPYKVDPKSGLIDYEKLRENARLFKPKMIIAGTSCYPQILDYAKFQEICK	2.16	3.72
	A19	16	EZ762223	contig23307:178:759:1|similar to GTP-binding protein SAR1 (Q23445)|Evalue: 1e-74	530	22052	15 (9)	57	193	5.84	MFLWDWFSGILNYLGLYKKSGKLVFLGLDNAGKTTLLHMLKDDKMAQHVPTLHPTSEELTMGNIKFTAFDLGGHTNARRVWKDYFPAVDAVVFLIDAFDRERFAEAKAELESLLADEQIAGCPILILGNKIDRPGAASEEEMRGYFDLYNLTTGKGNIARSELRGRPMEIFMCSLLRRQGYGEGFRWLSQYLD	4.45
	A11, 4-11	60	EZ759522	contig03353:100:1653:1|similar to Protein ERGIC-53 (Q9D0F3)|Evalue: 3e-98	529	58854	11 (10)	23.2	517	6.81	MRHVTRVLCPLFLAALLITICFSQTQTPNKRYEYKYSFKGPYIVLKDGSVPFWDVGGHALASDDQIRLVPSLKARKGYMWSKNTVGVDWWEVEFSIRVTGSGRIGADGMAFWYATERMQEGDAFGNKQTWNGLGVFFDSFDNDGKLNNPYIYVILNDGTKVFDHNADGINQQLGGCLRDFRNKPFSVKVKVEYYHNVLTMMLTNGLAADEQPELCIRAENIYLPKNGYFGLSAATGALADDHDVLSLQTSSLHDQPLERSQQISQMERQKLEGQFRDYSEKLEQQRQEYLRQHPEKAQEQQQQQQMGGAGQYENPQDRALRQIFDGQQFIHVAIQQLHRRIDELIGRQERTLSAITSISSASAMPQQPQQGYNTGVPPAAPVNQITGGQDALKRYEIDT…	0.72	2.45
	A10	59	EZ761644	contig20045:1:1552:2|similar to Leucine-rich repeat-containing protein 47 (Q505F5)|Evalue: 2e-79	528	58017	10	25.4	516	6.8	RIEENGLDQMIFELKNLNFLDISKTSLQLLDNRIGELATLNRLVLRDNKLKELPGAMGRLTKLKVLDISRNQLSSLPDIFSGLTELNNLYATANAIERVGDLSECTRLTTVDLSHNKLQEFPETLCSKSLVNLTDIKLDNNQLKNVSANISALAGLKQIDLSFNAITLFPKELAQCPKLKEVLLDENPLKDARLKKLITQRPTKHKAILDYIMANCATAKAVDSSAETGKDSKGKKGSAKVDKDSQNLTDIIDIMAADDSTKRVTVKPNVLLVRPYIVCCVLKNLNLSDPSVLKKFISLQTRLHDELCDKRAAATIATHDLSLIKGNMTYDAKPPATIKITPLNRQSEVTAEQLMSQLRQEAEALRKXEKENTVSGIHKYLTLLHEKPNYPCLISEDGE…	0.74
	A13, 12-16, 18, 19	41	EZ759889	contig05470:1:464:3|similar to Fructose-bisphosphate aldolase A (P05065)|Evalue: 6e-54	528	16379	17 (10)	68	153	9.39	AQYKALSDHHVYLEGTLLKPNMVTAGQQSSKKYTAQDIARATVTALSRTVPPAVPGVVFLSGGQSEEDASINLNEINKYNGAQKPWKLTFSYGRALQASVLKTWAGKKENVKGGQDELVKRAKNNSLACQGTYTGGAAAGAAAESLYVEKHAY	6.86	16.75
	A10, 5, 9-11	61	EZ762173	contig23074:128:1567:2|similar to Probable aminopeptidase NPEPL1 (Q6NSR8)|Evalue: 6e-108	527	52397	11 (10)	29.6	480	6.86	MKTKQITFSGVVSRSNPEEFPVLIVGHSDLLKTHLTYAAAQPKFGDVITEKLFTTAVAKLQPSVNSDVIPVYHNSVVVAALPNRCSRHNAPSQPHALTKILKDWSPSIQTVNGIKQQFVVIVCYAQDVFALSIAVARSYPLYSSKTSPLFGSKVVVGATDPSPVAAEAEPQGFVNVEFVVVPNNNVHIPWIPQFNDRSAFANLEIIGNAVRNAARIVDTPCLEYNTSSFVQEAKDMAKELGVKVTVIEGKELEAKGFGAIWSVGKAAEYPPALVVLSHIPESTNEFTPKKVAWVGKGIVFDTGGLCIKTPKTLMCGMKRDCGGAAAVMHAFRAAVKCGFKHELHAVLCIAENSVSSNATRPDDIIYSYSGRSIEINNTDAEGRLVLADGVAYAQKDLKC…	0.84	1.3
	A16	28	EZ761441	contig19076:172:1149:1|similar to Probable enoyl-CoA hydratase echA8 (P64016)|Evalue: 9e-22	527	35405	11 (9)	35.7	325	8.64	MASRRATASLLNTAFTLQKRKASAILKGFTSSTPLRTTVARFSSEMSTKQEDDGKLVLTEKLNQIFMIGLNRPEKRNCINRETASQLLSAVEQFEADDDAKVAVIYGRGGCFCAGWDLTALSEADEQWVASMPEFPGPIGXFTDVRKKPMIAAINGYAVAGGLELALLCDMRIMEETAVMGVYCRRYGVPLVDGGTVRLQALIGLSRALDLILTGRAVKGPEALQMGLANRIVSVGAAVGQAVALATQISKYPQACMNADRRSAYYAAYDAKSTKDALIYEHYNGMKVILEESIPGAESFKRGLGRGGKFNFGADDIDTINKGSQ	1.45
	A10, 8-10, 16	60	EZ762315	contig23619:142:1410:1|similar to Alpha-2-macroglobulin receptor-associated protein (Q99068)|Evalue: 2e-12	527	49117	12 (11)	31.3	422	8.19	MAKLSLLFLVLLAVVIPLVLSESKYSEEKSQPTSERHSSHSKDAKDSKDWKKSKESRDHRESKDSRDEKSSDEYKPSKDSKSKDKSKKSKDSKETKDKKYRDESDSKSKKYERKEAGESAADTYDFSTKKIKALWQKVEKKLSVEQLSKLMEALKGHDKEELDLKHRKHAGDDKDESLTEKLSAKFDDLLTKFNLTDLFKSDHLNSTKNRSKDQLFQDKKLNKLWKKAAKGNFTAEELEKLKQEFSDLQQKITDLGLRRTANTTADENTSDIDRFNSVSTASEESELLKESEQYTSGAFRDASDEIMEGYRRLKLRVSRKHSGDEFVTFHESRVEDLWNQALSAGFPREDLITIREQLYLLQNKLDKLRSYEEGLKVFKEHEGTHHSLDEMELETKTKN…	1.18	2.05
	A9, 8-15, 17	66	EZ759346	contig02386:1:407:3|similar to 78 kDa glucose-regulated protein (Q90593)|Evalue: 9e-42	526	15260	15 (7)	58.2	134	4.45	TNDQNRLSPEDIERMVQDADKFAEEDKKVKERVEARNELXELLYSLKNQISDKEKLGAKIAEDEKETIEKALNEKIEWLESHQDASADEFKEQKKELEEIVQPIITKLYQQAGGAPPPTGGEGGEEDDSSRDEL	6.51	9.72
	A8, 4-19	56	EZ759286	contig02107:1:417:1|similar to Myosin heavy chain, muscle (P05661)|Evalue: 4e-35	526	16121	16 (9)	57.6	139	8.76	GAAIKGGKRIIQKLEERVRELETELDSEQRRHAETXEELRKHERRVKELQFQSEEDKKSYQRMQDLTDKLQQKIKTYKRQIEETEEVAGMNLAKYRKLQHELEESDERADIAEQTLQKLRAKNRSGASVAPTAGAGGKS	7.19	45.53
	A13	43	EZ759233	contig01833:1:1065:1|similar to Serpin B3 (P29508)|Evalue: 2e-40	525	40066	11 (10)	34.5	354	8.85	VVASPLSILFAILLAYIGAENQTKTEIEKSIATGNSPRNAVLEGYTSIMRDLFPKANSSQRLYELTIANNIYVDKRFPLQTSYFDQTQRYLGVTGSAEDFMSDAEGSRKRINQWASQQTKGKIREALPSGKIDQSTVLILINAIHFKAEWIKHFDSYLTRDGPFHNLDNSQATVAIMQQTRYFQYFKDEQQHFQYIELPYAGNLNRMIIVLPDEGQRFQDIEKILTPELITATANNAHSRRVHLSMPKFKFDSQFDLKSALSSIGMDRLFSDRAELPGISTVPTKVSRAIHKAFVDVNEAGTEAAAVTVMAVAVRLSAARVEDPIVMKIDRPFLFTIRNEEKNIELFRGRVTKL	1.21	2.25
	A13, 12-16	44	EZ761783	contig20766:1:786:1|similar to Uncharacterized oxidoreductase yhdF (O07575)|Evalue: 1e-49	523	27880	11 (8)	39.5	261	6.92	NCSTLLLEGANVAIACLEEEMKDAQETKRLCELPMDALIAEMSKINPESAADFTAEAATAKKFGKSRAIIVTGDLAKPETAGKLIQDATRQLGKINILVNNAGVQYQVDDITNVSVAQIQKTFAINIQSQIYLAQAVVKQMVKGDTVINTASRGAYVGSKTSVDYSATKGAIISFTRSLSLNLAGKGIRVNAVSPGPVWTPLDASTYQTREKIQAHGKDTPMGRPAEPCEIAPAYVFLASFDANYVSGTTVHVNGGQITGS	1.47	3.85
	A16, 15-17	30	EZ759171	contig01488:2063:3062:2|similar to Alpha-soluble NSF attachment protein (Q9DB05)|Evalue: 7e-79	523	37530	11 (8)	33.1	332	7.63	LSGKCCQVFRSSSVLLPPKPVVTCVGTCTYHFRFIRASKMSGSAEEAQAQKIYDEAKKKTQTSKGFLSSVFGSGSSKLDEAIELFCKAANLFKIAKNWGMAGQSFLNAAEINLQTENRHEAANKFVDSATCFKKVDSTEAIKQLQRAIGILTEMGRFTMAARHYNTIAEIYEENRDLDRAIGAYEKAAEFYQGEESQSQANKCFLKVAHFAAERGDCAKAIQIFETVATRNADNAMLKYSAKEYYFKAALCHLCVDAINAQHALARYEEQTPSFQDTRESKLLKTLLTAIEESNVDAFTEAVKDYDSISRLDQWTTSMLLKAKKNIGESDLT	1.14	1.32
	A16, 14-17	29	EZ761274	contig18379:1:612:3|AGAP009479-PA [Anopheles gambiae str (XP_001230737.2)|Evalue: 2e-22	523	23288	26 (8)	48.8	203	4.95	PFNPNQEPMSAFQASQMLINAAIQQGANKNNFAIQTNARYQIAQTRNPQNPEPFAALDQLRGRQSLTIEEILNILATAVPGRDYPVYNDIPNTRFSCEGVRQAGFYADPEAQCQTIRRCDINGVMWSYLCPNMTIFNQITLVCDWFFNVNCNNVAAYYDYSNPRLYTQFELLDSPGRNQYVQPRPTPVYVQPAPQPAPAPAID	4	6.58
	A9, 8	67	EZ760418	contig09306:395:2317:2|similar to Propionyl-CoA carboxylase alpha chain, mitochondrial (Q612F5)|Evalue: 0.0	522	71610	13	28.6	640	6.1	MHVRMADEAICIGGAATSDSYLRWERIIQACRTTGAQAVHPGYGFLSENTEFAANLEREQITFIGPNSKAINALGDKIHSKEIALKAKVNTIPGFKGEVKDADHCVELAKGIGYPVMIKASAGGGGKGMRIARDDEEVRQGYRLSKEEAKSSFGDDRMLIEKYIEKPRHIEFQLIGDKHGNAIYLNERECSIQRRNQKVIEEAPSPFVDPQLRQRMGEQAVSLAKAVGYDSAGTIEFLVDKDKNFYFLEMNTRLQVEHPITEAITGVDLVYQMLRSAKGYPLKYKQQDIPINGWAFEARVYAEDPYKAFGLPSVGRLKTYREPQNSVPESAIKENGDGYIRCDTGISEGSEISLYYDPMICKLITVGKDRQHALDILTNALDSYVIRGVTHNIPLIRDI…	0.71	0.96
	A8, 7, 18, 19	57	EZ760121	contig06974:219:1922:3|seems to belong to G-protein coupled receptor 2 family|Best-hit: Gastric inhibitory polypeptide receptor (P48546)|Evalue: 3e-05	522	64946	15 (10)	26.5	567	5.13	MSLRHIYLLLAILLADYATKAQSVDSYDYNSLHSKSFITVQKAQWRFNTEIECLKFLRRLKSLRGPKSNSCHGEYDGVLCWRYGEPGETVKQLCPQDLDIGHELAEVYAHRVCGQDGQWLQFDGYPGSKNLNTNYDSCKDYNRTHYATHRDTHTSHSQHTQPMHPPPPGHPDYHLWLQSQRAQDNSGAILVEPTQQPTYYTQETALPIYPYHEQQTTQYWATGDHTDLPVVTDIPDMPSTADNVVTDMPDMPLETQTSVQDASLILLATTPVYEPQEYPWIFPNRDECDRYLRQLGFDKNADGPHCPGVYDDVKYCWPATRAGVTMEQPCPVFGSNPASYSTVKKNCDNDGQWNKTTGEGGIIEAPFGYTDYTACKHDEMLATFEAKPQKLELNNESGN…	0.72	0.92
	A11, 4, 5, 8-11	61	EZ761192	contig17939:1:834:1|similar to Pyruvate kinase isozymes M1/M2 (P14618)|Evalue: 7e-94	520	31042	14 (10)	54.5	277	8.29	IKIISKIENYQGIVNLDEILEVSDGLMVARGDLGIEIPPEKVFTAQKMMIGKANRKGKPIICATQMLESMVEKPRPTRAEVSDVANAVLDGADCVMLSGETAKGMYPVQVVRMMHMISLEAETAIFHGQFFEEIRRSIDLPMSVTATCAVSAVEASIRSQAAAIIVLTTSGQSAAVIAQFRPKCPIFAVTRHEWVARQLHLHRGIYPLYYNVARNDDWSEDVDTRVQAAIRCGFRRKVVKPNDNLIVVTGWQRGTGFTNTLRIITAPNLTTEQYEKQ	2.75	3.7
	A14, 4-8, 11-15	39	EZ762278	contig23480:1:1099:2|similar to Mitochondrial carrier homolog 2 (Q791V5)|Evalue: 3e-20	518	40871	13 (11)	32.6	365	9.28	KLAESLAGGRQPETQGIEPTLGATPHERDVQDEMRTLAKVALVTALQHPLNYSQLLMQLGFEPISARPGKDLFRRPQLYMGSIFDYLVFVKKREGFAGFFRGFGHSLTGAVVALYANRVAERIVRYAIDETYFGRRGAAVQRRFQFLEPASDDHNIRAQVRYEPKLIAGKTYTLNDLAEDLVKETAVITLTMSLSWPFQVISFRCMAQFLGGETLYDTIPSAVNEIVSTEGAKGLWSGIVPAWVVVTGVTVLTNTGLYIYAMYNPENPLNLRILHIFGGAIVNGFMYPLKLVSRLMAISGARLTAARPPLLPAFVSWQDCRNYLREIGEDKRGNSLFWRKAAMKKGAQFDFNDPKDGLFSLNTVN	1.54	3.22
	A8, 11	58	EZ759976	contig06011:1:452:3|similar to Heat shock 70 kDa protein 4 (P34932)|Evalue: 1e-15	518	17662	15 (9)	57.7	149	5.07	KPKEEKVKRMKKQVKTIEMPIEYRTPNYDISPKRLNEFIEFENEMRSQDKKEKEKVDAKNELETFIYDARDKISQDNSPQISHVEREKFSEQLRQTGDWLYEEGDDQSKEVYMQKLFDLQVEFAVLTKRDDKSADKAGAEGDSGPQQMQ	3.84	4.03
	A16, 14-19	31	EZ762389	contig23875:2066:2840:2|similar to 40S ribosomal protein S2 (Q90YS3)|Evalue: 6e-97	518	28129	21 (12)	48.6	257	10.09	GGGGGERGERGDRGGRGRGRGGRGGRGRRGGKEEKEWVPVTKLGRLVKDDKIRSIEEVYYHALPIKESEIIDKFLGPKLHDXGAQDHACQKQTRAGQRTRFKAIVAIGDRDGHIGLGVKCSKEVATAIRGAIILAKLSIVPVRRGYWGNKIGKPHTVPCKITGRCGSVLVRLIPAPRGTSIVSGPIPKKLLNMAGIEDCHTSTAGSTGTLGNFAKATYDALAKTYRYLTPDLWKELPLQQNPYSMHFEHLAKGSIKK	5.01	7.69
	A19, 18-20	17	EZ759025	contig00683:1:486:1|similar to Ras-related protein Rab-7a (Q3T0F5)|Evalue: 1e-71	516	18319	14 (8)	68.3	161	4.52	FLTKEVAVDDRLVTMQIWDTAGQERFQSLGVAFYRGADCCVLVFDVNNPQSFKSLDSWRDEFLIQASPRDPENFPFVVLGNKIDLDTRAVTSARANGWCQSKGNIPYFETSAKENINVEQAFQTIARNALAQESDADLYPEFPDQIKLTTDTKSKSDGCAC	3.58	4.42
	A16, 15-17	32	EZ761396	contig18880:1:1138:2|similar to Transmembrane protease, serine 13 (Q5U405)|Evalue: 7e-17	516	41044	17 (8)	46.6	378	8.48	GTLCFYGGQTNPTTTPNPWDTTQNPWFTTQNPWFTTPATQQQPQYCSMSLNSGIGIGFTQNPLFPDGSSTLFPDGPGIGPRSLDSEKNSRIPRILGGTQVTAMNFVDHCWVAAIYASNSYIAVGTLLNSQWVLTSASTVAKYASTVQQFPNQMQVVFGQTQAANPQSQPQNTYSIAQIVTHPNYRQVSPGYPVFDVALIRLNRAVNFAAQPTICTACLAATNLPDTRLNGYCRVAGYGASIPNNQQTDGVLRVVDVPVIPRPVCSFIFATLLRISNFAIDDSTMCAGGEPNRDSCTKDGGAPLRCTYTDLIYPVVSGISSWGTGCGRSGVPSAYTALNGNNNIQQWIRSIAGALLPAPPFRSASADTSADKSVVKASK	1.17	1.97
	A16, 15-17	33	EZ759533	contig03405:179:1102:2|similar to 3-demethylubiquinone-9 3-methyltransferase (Q1QEI9)|Evalue: 5e-30	516	34610	18 (9)	31.9	307	6.71	MANLVQNLLQIAVLWSSIPFRIAYELFFWAFPPKQVAERPAAGELKSRVKPTDRMDNGQLQLWSSLAKTWWTSPNFTLLRGINRVRLPLIIETYAREVLHDDVESVKRQDKPLLAAKIADVGCGAGFLSEPLAEMGALVTGIDLIPDVINAAQAHWTDNHELEYLGPEYICEPISQVAASRNGEFDLVLCSEVIDHVSNTREFVEQTCKLVKADGVVIFSTINRNIIAMLGAIILGEHVFRRIPLFTHHLHKFVKPSELSKQLKDLGFLPLKTGGWIPTNPLATDGMWMPFFSSVAVYYIVAKKLGK	1.73	2.03
	A7, 6-8	48	EZ762451	contig24163:1:1502:3|similar to Insulin-degrading enzyme (Q24K02)|Evalue: 2e-100	512	58187	12 (10)	22.8	499	6.31	SKIPVLIRKSPFSRLWYMQDTEHKLPKAVAFFEFVSPIVYKDPLHANMTYMFVELFRDAINEFAYVAELAGMKYAIEQSKYGVTNSGTLLQQSSFQLSVRGYDDKIDVLLQILMEKMMVFQPDRKRFDVLKELYARQLKNFYVSEPYKQAPWYFNVLMSEVCFSKESLIGALDEMTFERLEQYKTLVFSEVYIESLVFGNVTRQKAEHMIDIVETCLRAHDAKPAERVERLKLVKLSEGESYIYHNVNDVHKSSAVGAYYQCAFEDPRSNMLVELFEQIINEPCFDFLRTKEQLGYIVFSSVKNVSGVLGLQVMVQSHRKPAYVDERIESFFVEMEKLLAEMTDKEFKTHIDALAVKRLEKPKTILQAATKFWNEIYVRQYHFNRDIVEVEELKKITRQ…	0.83	1.07
	A16, 4-6, 15	34	EZ761075	contig17480:61:1323:1|similar to Epidermal retinol dehydrogenase 2 (Q7TQA3)|Evalue: 5e-62	512	47426	15 (12)	35	420	9.55	MFERCAVKWSDLSILYKCTIIASFNRFRENVTTLGLLRNLSFFGSKFKFILCGFKRRRAFAATIAAAVDSTRTATLVSRYSTSDVRTYLSSVHRKCPSKMHPLLEFIWSFLLILYYTLEAFILLLVPRKYRTKKSIFGEVALVTGAGSGIGQKVAIELAHLGAKVVLWDVNKQGLDETQRRITENGGEAMAAVVDVSDRDAVYSAADDVRNRLGNVTMLINNAGIVNGRYLLDIPDEKIEKTMQVNVMAHFWTIKAFLPYMISVNRGHIVTISSIAGKAPTSQLVDYCASKYAAIGLHDALSIELRALGKDSIVLTNVCPFFISTGLFEGAKSKFDLLLPILEPQYVANRIIDGILLNQYQVYIPKALYYLIPLQSLLPHKVLVTMEEMFGLREYMKGF…	1.24	2.35
	A19, 17-20	18	EZ761032	contig17128:1:666:1|similar to Superoxide dismutase [Cu-Zn] (Q8HXQ3)|Evalue: 5e-52	512	23719	25 (7)	37.1	221	6.16	VVALLKQSPVHTVLRPSFAIQSSYVMEAVKQFFTGEGGFKAIAVLVGDSPVKGVVKFTQAGPHAPVKVCGELNGLAPGQHGFHVHQFGDHTNGCTSAGAHFNPEGKEHGAPQDDNRHVGDLGNITADQNGAAKFEITDSKISLNGEYSIFGRSIVVHEHPDDLGRGGNDESKKTGNAGGRLACGVIXSREAKRLISIDSSVLDNWVFGFCLDMIHFDMTFG	4.55	7.3
	A12, 11	60	EZ763297	contig28141:1:1138:2|similar to Serpin B10 (B3RFC3)|Evalue: 8e-45	511	42716	13 (9)	34.1	378	5.26	YGGAEGTTKDEIEASLSLHKGFPQKSDVLSAFAQLMQLLNFEEVKPEPSKASKVEATSDDPNVEIIRAPIMVKHEDMQMDSKKADGTQLALANSLYVEQSLSLKPLYVKTAEQHFNAKPSTEDFRGDSEGARQRINKWVEEVTHKKITDLLQPGAVSGSTMMVLVNAIYFKAAWHNEFEVYRTEEKEFRGFNQTSQVQMMHDRRDYKYFRNDILKFHYVEIQYQKGEVSMCVVLPDEDNGLKALELSMTPELLIEAIAKASLTDVMLDFPRFKSTQDYDLEMPLKKMGMEHLFKGADFSGIADGGLSVSAVVHKAFIEVDEKGTEAAAATAMMMAYDSMMTLEAPKEPIIVNCDHPFLYVIKHNKAHLPLFFGRVADF	1.44	1.52
	A14, 13	41	EZ762756	contig25297:1:781:2|similar to Uncharacterized oxidoreductase yhxC (P40397)|Evalue: 2e-58	511	28563	14 (9)	45.2	259	5.18	FTLEGANVAIACLAQEMKDAEETKRLCEANVETLVREMIKINPESEKEFLDEMTSVRKEGNARVIIVTGDVGSSAECKAMVEKTLAEFGRINILVNNAGEGHDQDDLLHVSEEQMKRTFATNIFSNFYLAKAVLPQMKRGDSIINCASVNPYMGKSKQIDYTATKGAMVSFTRALSTNLADKGIRVNCVAPGPIWTPLIVAENTPSGAKKHGEDEEEWPLGRHGEPCEVAPSFVFLASFDANYITGQTLHPNGGKVVNG	2.02	2.41
	A13, 12-19, 21	48	EZ762573	contig24527:81:472:3|similar to Fructose-bisphosphate aldolase C (P53448)|Evalue: 7e-46	506	14046	14 (10)	68.5	130	5.84	MSSVPVYLTDAQKKELSDIAQRIVATXKGILAADESTGSIAKRLQSINVENTEENRRLYRQTLFTAGGEKGLSEYLGGVILFHETMYQKADDGRTFVKVLKDAGILVGIKVDKGVVPLPGTDGETTTQGL	6.02	14.53
	A19, 17-19	19	EZ762569	contig24510:145:671:1|similar to Myophilin (Q24799)|Evalue: 4e-31	505	19774	10 (9)	62.9	175	8.31	MTTPTRAVKSGLAAEMHNKVQRKYNEERAAEVCEWVNKILGENVLSTSGKMEDFYEGLKDGVVLCRLANEIQPGSIRKVETSKMAFKCMENINNFSRAATSMGVPASDLFQSVDLWEKQNLNAVVICLESLGRKVGKFGKETLGPKESEKNVRNFSDEQLRQGETMISLQYGSNK	3.12	5.3
	A8	60	EZ761413	contig18933:1:2374:2|similar to Protocadherin Fat 1 (Q14517)|Evalue: 1e-14	504	85812	11	19.2	790	5.17	LPETTFGLFSIDTDGGAIRVQKSLAGSRRTTLLFPARVTDPSNRYCESQVRIRILEDSNPSPQLPTFPQNSYTFTLTTCQPSQTPVGQVTVQSANPPITYTIDGQSPFYVDSNGNIILNQQITAGRTQFTVRARDALGNTAATTVIVQATCGTSPIVNGPQFQQQIYSFNAPSACYMGGLVGSVVAASANGQLLTYTLDTTDFSIDQFGQIRVVNPNYRATPFTVTATDTSGQAAHTTVTVVQCGSSSAQGPVFTSTNPTFTPTSCLPHTLIGKVTANGENVRYHMESGPDEGYFVVDPMTGEIKSTFYLGASSTATLSIKAIDNNQQTAILTVTIQNPVNCENAPPSTQRPLWSNCGSTTMCKYRITPTCKPPQYSQFTGTGLPLLANDPEGGRVLYK…	0.45
	A11, 4-7, 9-11	66	EZ758954	contig00321:1:1219:2|similar to Cytochrome P450 3A4 (P08684)|Evalue: 2e-68	504	46066	13 (10)	34.8	405	5.98	VPTFTSGRMRQMDDLINECCDAMTANLQKLADSHEEFEAKKFFGTVTLDVVATTFFGAKIDSQNEPNSPFVKNAVKAFDITFRNPTLILAVLFPKSIPYLKKMGFQFQGEDIMRFFHEATDKIIQMRIDSKTVRRDFLQMMIGALRSADNTGQNAAHSALKPAQSKHQEKVTETDVLSDAISGGHHETPVTESLNRTLTNKEVIAQSIIFLLAGYETTAGALTFLTYHMAVYQEAQERVRAEIEEVMGDADTPTYDMIAQMEYLDCCVNETLRLYPPAQNLDRQCNEEYKIGTLKIPKDMIVATSVLATNKDPEYWPNSDTFKPERFLKENKSNVIPMAFQTFGQGPRNCIGMRFAYFEIKMVMVHILRRFRFVRTAKTPDPPLTLSSALFSAVKGGIW…	1.46	3
	A13, 8, 11-14, 16-18	50	EZ759364	contig02499:128:721:2|similar to Prostatic acid phosphatase (P15309)|Evalue: 6e-25	503	21711	15 (7)	57.6	198	8.99	MMAHPYRKYFGLWIGFALIMGTAGASANGPYGRQDNALPQYAELLPHADPKSNPPITKTLASVQVVHRHGSRSPIFTFPTDPYGKTVWNNELGQLTSKGMQQMYQLGQYLSARYSSYLGPKFSIPEVLIVSSAVERAVQSTLVNAAGLFTPSGDTIWNSGSSEIGKTWRPYPVFAIPPESDMFMFVATGTCPLGDTLR	3.2	6.37
	A12, 11-18	61	EZ761935	contig21923:132:1186:3|similar to Hydroxysteroid dehydrogenase-like protein 2 (Q66KC4)|Evalue: 1e-104	502	38946	13 (9)	32.8	351	6.26	MYNSGKLSGKTLFITGASRGIGKAIALRAARDKANIIIAAKTAEPHPKLPGTIYTAAEEIEKAGGQCLPCIVDVRDEGLLQKAVDDGAKKFGGIDILINNASAIFLSGTLDTPMKRYDLMNQVNARGTFLASKVCIPYLKKSKNPHILNLSPPLSMKPIWFRDNLAYTMAKFGMSMCVLGMSEEFKNDGIAVNALWPRTAIWTAAMEMLGGEEAAKKSRTPEIVADAAYEIVTRNSRQHTGQFYIDDSVLREAGVTDFDQYAVEKGQDLMPDFFLDSMDMRDIHKHRDEMRDFTKDTFQKLGDTKGASSSDAPKATPQQVFSEIAQLLKSTPNQVKGSYLFDVDGEQWFMD	1.26	2.23
	A10, 11	66	EZ759570	contig03564:118:1004:1|similar to Prostatic acid phosphatase (A6H730)|Evalue: 1e-17	501	32710	13 (9)	47.8	295	7.01	MQFXEQFLDTNIPGVPSAAGSAGQSQYNANNIKANDAGTRKLVLLQVVRRHGARAPLTIMKRCDPYWNTTFAEGGGQLTKFGKEQMYNFGQYLKGTYSDIFAEGYNSQKVQILSSGINRTVHSALLNMHGLYRPLTPEQWSLSLRELSAFWQPSPIEVIPLNKDIMINPKSKVCPQLNKNLFGAALFNPTIVSLKTLGFIVTEGDDILTDLDHNINQCGLSAVDPKAPIDAEPEDAMPEKGSFAHAKGQSPLSLIGLGDLLSNVKKSALQLFSFVKEFMDWVQSMYHGGLPMPNW	1.39	1.6
	A13	51	EZ762128	contig22870:100:1383:1|similar to Isovaleryl-CoA dehydrogenase, mitochondrial (P12007)|Evalue: 9e-170	501	47694	9 (8)	29.7	427	8.4	MAHLLSRTAHTALTILGSQTRRETAVLGRRFAGSYFPVDDVIFGLNDEQKQLREVVFNFVQKELAPKAQEIDATNTFKDMRDFWKKCGELGLLGITAPTEYGGTDMGYLAHCIINEEMSRASGAIALSYGAHSNLCVNQITRNGNAQQKAKYLPKLISGEHVGALAMSETGSGSDVVSMRTRAEKKGDRYILNGSKFWITNGPDADVLVVYARTDQKSKPQHGITTFLVEKGMKGFRTAQKLDKLGMRGSNTCELLFEDCEVPAENVLGQENKGVYVLMSGLDTERLVLSGGPLGIMQACCDVTFDYVHQRKQFAQEIGTFQLMQAKMADMYTTLSACRSYVYNVARACDKGYINSKDCAGVILYTAESATQMALQSIQALGGNGYINEYETGRLLRDA…	0.82
	A18, 17-21	20	EZ759210	contig01724:145:861:1|similar to Dihydropteridine reductase (P11348)|Evalue: 2e-62	498	25377	16 (8)	47.1	238	6.97	MAGESTKRVLVYGGRGALGSELVRHFKSRGWWVGSLDFAANDEANANIAITKAESIVEQETEITEQLTRVLEGQKLDAVLCVAGGWEGGNVAAKDFVANTNTVIKQSIWTSVIASKVSSAHLKDGGLLALTGAKAALEATPSMIGYGLAKAAVHHLVKSLAVPQSGMPVNATTVAILPVTLDTPMNRKFMPKADFSQWTPLPFVAELFAKWIDGHERPQSGSLITVVTEKGQTKLDIV	2.44	3.11
	A6, 7	33	EZ760858	contig14306:1:1517:3|similar to Isoleucyl-tRNA synthetase, cytoplasmic (Q8BU30)|Evalue: 1e-147	497	57122	12	27.6	504	6.27	KSKKNYPDPMKVVHDFGADALRLYLINSPVVRAENLRFKEDGVRDILKDVFLPWYNAYRFFAQNRELYEKQNGVKFVYNESELVSSSNIMDKWILSFTQSLIDFVKKEMAAYRLYTVVPRLIKFVDLLTNWYVRSNRKRLRGEGGPDDCRHALEVLFLVLYSMIRLMAPFTPFLTELMYQNLKHFIGNNSKEKLEDSVHFLLLPETKTELIDKNIERSVAVMQSVVELGRQIRERNTLPIKSPLAEVVVVHQDQQLLDDVRSLEQYVLDELNVRSLTVTTDKDKYGVKMRAEPDHKTLGVRLKGAYKAVMDAVKSLSDVHLKQFQDSGFLDIAGSRLEGTDLKLSYFFDKTAGGNTDSTKNYDAQADEGVLVLLNLSQNQELLDEGTAREVVNRIQKLR…	0.96	1.36
	A16, 15-17	37	EZ762157	contig22991:1:525:2|similar to Proteasome subunit alpha type-1 (Q9R1P4)|Evalue: 7e-53	497	19392	16 (10)	75.3	174	7.98	GMKNSSYAVLAAVKRVPSELASYQKKLFAIDDHCGVGIAGLTADARTVNNFLQTECLNHRFAYSKPMPIGRLVGKLGNKMQVSTQEEDRRPYGVGLLLIGWDESKGPHLIQIDPSANHFESKGMSIGARSQSARTYLEKHMDEYLATETIEHLVHHVLRAIRDTLSNDQDLAAK	5.81	6.88
	A18, 17, 20	21	EZ759267	contig02032:933:1673:2|similar to Eukaryotic translation initiation factor 6 (P56537)|Evalue: 2e-115	495	26874	15 (9)	57.3	246	4.67	MAVRTQFQSSNEIGVFSKLTNSYCLVGIGGSENFYSVFEAELTDSIPVVHASIGGTRIIGRLCVGNRHGLLVPNSTTDQELQHIRNSLPDSVAIQRVEERLSALGNVVACNDYVAVVHPDLDRETEEILSDVLKVEVFRHTIADNVLVGSYCALSNQGAVVHSKTRIEDQDELSSLLQVPLVAGTVNRGSDVIGGGMVVNDWVAFCGLDTTSTEISVIESVFRLTEGQQPSNIATQMRESLIESLS	2.62	3.3
	A10, 10-13, 16	68	EZ760500	contig09965:1:1632:1|similar to Importin subunit alpha-7 (O35345)|Evalue: 2e-165	495	60918	9 (8)	27.3	543	5.07	SSSLLHSYSALFLIEKASKMASSSHRSKYKHTGIDTQELRRRRDDERSMLRREKRDEQISKRLNIGGNLASSTDEENDMQEADSTAQIVNITQDMVNDLFSNDKKRMLSATQNFRKLLSREPNPPIDEVINTGILPKFVEFLQLGDQPQLQFEAAWALTNIASGTSQQTRKVIEAKAIPIFISLLDSPSEDVQEQAVWALGNIAGDSPECRDLVINEGILEPLLTIFPRSKRLSMMRNAVWALSNLCRGKNPQPNFEKVRPALPVLARLLFHSDADVLTDACWAISYLCDGPNDKIQAVIDAGVGRRLVELLSYDAQNVVSAALRAVGNIVTGDDIQTQTILNCGVLEPLKMLFSRDEIKDAIKKEACWTLSNITAGNRVQIQAVIEADLVRILVHILS…	0.52	1.06
	A11, 10-12, 16, 17	70	EZ762452	contig24169:185:1633:2|similar to LIM domain-binding protein 3 (Q9JKS4)|Evalue: 3e-06	494	52968	11 (10)	28.6	482	9.57	MPVTKGLIAIQLHRDAFNKAWGFRLQGGAEYGQPLTVQRVFMGSPSEGVIHRGDTIVRLGEHDASRMRLADAEQVIKNTALSLRLEVQRSGSGSASNPTSPTPMSNPNPPAWYGSPTFNALQNQGQQSQQQHYSQPQQQQQYSQSQQQQYSQPQQQQYSQRPQQQQYQHQRQTSVQQLQPDHIEAQWNDDESAAAGPGIRYLVEKEKQKKSHVLDYVAPLPNLDRLSVTNQTYRSGGLIKPEPKAKHYQTQGSYLGGSFGRGYARPEPVNASYAGQQNRGVRGGQRPHSVYEFGGNSYGNNLSPQIQRQSSYSPSSPNTYGAKPKWPQTPQTPTGSRQVQWPPANSPQPTSPTPNQYHYDQMNGGSSYSAPTQAAQLPIAIPNQTTDNKRIAHLQFNSP…	0.94	1.98
	A11, 10-14	69	EZ760419	contig09307:77:854:2|No Annotation	494	28770	14 (8)	37.5	259	6	MSSSTEHSLNRTHPRYYTNTTANAQSSQPPLSQHNFTSNLTELDALMSDLEAVRRSTAGGPTVRTYEANTEVSHTFSMSKDGGVSVSDSSHSRSYRDDSNRDERDTSSPLVIRPKSPASQRKVQPSASSPRQARANTSVATQELDDLMASLSDFRVNENTSSTREERSYREERREERRDFQDSPGRFSDSDRPNRESPGRFSDSPANTTYPRPTSQRDDPWTKTTNANGQSTVDRSGSRASDTSDANSCAGCDKTINGQ	1.99	2.62
	A7, 6	49	EZ761437	contig19059:1:2293:2|similar to Neprilysin-2 (O16796)|Evalue: 2e-108	492	87708	11 (10)	16.3	763	6.31	QKWTLRRPVLVVEDYPKKKSNTGTKVIGAIIFILLCTTIAFAVLYFMPPTPAEEVKPNEICMTKGCVEAAGLLVQNMNRQVDPCDNFYDFACGNWNKTNPIPDDKGRWGVFDILRTQLSRNVREALETVSTASDNEAIRKARGYYAQCFNETIIDNAGIKDFQKHFNEFFENKADNWPFLSTSTDAEVPTTDELKRALMFARKYQMTLGFLNNGLATNSYKPSENMISFGSPVFGLSRGDLTSNTTSDQRDAYLTYMTELSTEYQKQVQNVSQLNTSTAYQDIFRDILNLEINLAKQTLNDVDRRNVSLSKINMTMGEFIDKYQPRLLDTGFWQRYFEGAWPGFKFDISSLINVGDTGYYNYTKVITDEKGDFDLATRRMIANWMGLRFVERYAPRLNR…	0.44	0.52
	A11	72	EZ759491	contig03161:1:931:2|similar to 2-oxoisovalerate dehydrogenase subunit alpha, mitochondrial (A5A6H9)|Evalue: 5e-120	491	34981	9	43.4	309	8.41	SAAALDNRDLVYGQYREAGVLMWRGFTLDQFMNQCYGNSEDLGKGKQMPVHYGSKDLSFVTISSPLATQMPQASGSAYVYKLMGNGLAVICYFGDGAASEGDAHAALNFAATLECPVIFFCRNNGYAISTPISQQYRGDGIASRGSGYGIKTIRVDGNDTFAVFNATKTARKYAVEQNKPVLIEAMTYRVGHHSTSDDSSAYRSIDEVRYWDQEDHPVVRFRKYLISKDLWNDEKEVKWKEDCKKQILQAISKAEKKLRPSPDELFTDVYDKMPWHLQKQKKEMLIXVKANAEHYPLKSHLKMGSTTSA	1.26
	A11	71	EZ761513	contig19378:129:1640:3|similar to UTP--glucose-1-phosphate uridylyltransferase (P79303)|Evalue: 0.0	491	57086	10	20.3	503	7.76	MAAIRHAELSVVDEQKRNTINGTYAELQRLLQTAPPEKAVHFEKDFAGFQTLFSRFLLDAGSAIQWDKIQRLPEVAVRNYSNLRSCNDDEKIRAMLNKLVVVKLNGGLGTSMGCKGPKSLIQVKNDQTFLDLTVSQIEHLNISYGVDVPLVLMNSFNTNDDTDKVLHRYRSRKVRIVTFMQSRYPRIDRETLMPVAKNLSSSVLEVWYPPGHGDFYQSFYNSGLLLQFLNEGKEFTFLSNIDNLGATVDLDILNFLLNPEETREEGRHPHDFVMEVTDKTRADVKGGTLILYEGKLRLLEIAQVPKLHVDEFKSVNKFKVFNTNNLWIRLSSILKLVESNSMRLEIIVNHKALDNGSNVIQLETACGDGVRNFEGAMGINVPRRRFLPVKKTDDLLLIM…	0.75
	A9	69	EZ759948	contig05826:1:988:2|similar to Dipeptidyl peptidase family member 6 (P34422)|Evalue: 4e-21	491	37192	11 (9)	32	328	5.44	RKLQSNFRFHQTYVAFVGDGIYAFGYDTDKPMTLFYYDLKTDVVTPIKSNVEIDEFKGYLSKAEQITFPTASGVNAYAFFYSPTNKDYTASKDELPPLLVRAHGGPTASATPRLRLSYQFYTSRGFAVVDVDYQGSSGYGREFREALYGKWGVLDAEDCKYCVEYLVKNNLVDPERVVISGGSSAGLTVLNGLINYKDVFKSGASYYGVTDLVMLAGDTHKFELRYLDQLLGPLETSRAIYEERSPINNADKLQRPIIFFQGTEDKIVPPSQSESMYESVKKKGITCDYILFEGEGHGFNDGKNIKKALEMEYQFYAKVFEIFPIKVD	1.16
	A13, 14, 16	52	EZ761403	contig18905:252:1415:3|similar to Heterochromatin-associated protein MENT (O73790)|Evalue: 7e-57	491	42772	12 (11)	37	387	6.92	MLLLCIFLPQIWCQTPPKNGETFDFAFYRNVAKGSQSSENVFVSPFSVESALSMVGMGVRGSSQSQLSELLGLDLSSSQSLATLGRRTSSIDSGAKNYTLRSANALFVDRSFPIKASYKTAVGQTLKSDSFPVDFRTKTSEATQSINSFVSRKTENLIPKLLSPGALTSDTRLVVINAVYFKANWQLSFRPDNTQNRPFLTGSGDSKDVPLMYANDRFRTTVNAELQVSMLELPYTGEEMSMFIVLPQERLTDLTQLESRLTSEALRSMIAALTSRRVAINVPKFKLELSYDLIPTLKAMGVEAIFGNGADFTGLTDANNVKVTNVVHKTFIESDEHGTKAAASTAIAVSLKSVFIPEEITCDHPFLFFIRHNPSDTIVFFGRISDP	1.27	1.88
	A13	53	EZ759529	contig03390:223:1404:1|similar to V-type proton ATPase subunit C (Q9U5N1)|Evalue: 8e-147	490	44229	12 (10)	27.2	393	6.88	MTEQWLISVPGEPTAQVTLENLNAATSKGGNTSANLSANYRFAIPDLKVGTLDQLVGLSDDLAKLDAVTEAVVRKFAAYLGDVLEDKKEKLNENLQANGLDLRTYLQKFSWDAAKYPVKQSLRAIADIISKHIGQIDADLKTRSSAYNQLKGNLLNLERKATGSLLTRNVGDLVGRDDFVLDSEYLNTILVVVPKSQVNDWNAKYEKLTDMVVPRSSKCVFEDPENSLFTVTLFQKVVDEFKLKARENKFIVREFVYNEKELAAGKVEIDRLTADKKKQYGPLVRWLKVNFSEAFMAWIHVKALRVFVESVLRYGLPVNFIAIMMEPNKKTSKRLREVLNQLYGHLDTGGLMSEKPSDANMDVAGIGGFGNQDYFPYVFYTINIEFANEGQKS	1.06
	A14, 13-15	46	EZ762679	contig24958:198:1241:3|similar to Aldo-keto reductase family 1 member B10 (O60218)|Evalue: 4e-70	489	39454	17 (10)	41.8	347	7.11	MSKCPITQKLFQCKNGESKMAPKGPSTSLQLSNGMAMPIIGLGTLRGSAEEIRNAVKDAIDMGYRHIDTAFAYHNEADIGQAVREKIADGTIKRTDMFIVTKMPSSYMEPERLSIALEKSLKALDLQYIDLYLIHSPVGFVYKDDKTLYPMDEQGKIMTHKVDHLALWGEMEKAVESGKVKSIGISNFNKRQIQNILDHCKIKPVNLQIECHLYQQSRKIVDWCQQNGIAVSAYGPLGSPGIVQPPQKDGEPLPPILQDPYVLSLAKKYNKSPAQVLLRWLTQRNIIVLPKSTNRGRLQENFNIFDFTLTNEEMKGFEDKDHKICLYGAATIPGMSEAHEYPFDDEY	1.63	2.33
	A11	73	EZ763217	contig27714:1:1436:3|similar to Glutathione synthetase (P48637)|Evalue: 1e-75	488	54179	10	26.6	477	5.87	QKLRQVLQSQPQLLSEAVERIKDAETSMGILFKNAEPLDSYEPVPVTLLPSMIPSAPLNEVLQVQNTINLMMHRIAHDRDFLQTSLSGVCAVDDFVRNLMDIYLQVDYSQQWELGLIRSDYMLHMASAWDAIDLRDAFKTAVYKQVEVNMICIAFAGLSSRMHTVHKAVLGALNVELSERPGSGEVLPMYGSAINMAHGIYCKENPSNRERVVLAVIHDGERNTMDQRLIEFESAVPTIRRTFDDIAKSARFENGKFYLEEYEVAVVYFRSGYAPHQYKSDMHWKLRLNMERSVAIKCPSAAHQLANFKKIQQELSRPEILERFVAESKDRDLLLRVSAGQWDLSTPESRHMIEEAIARPHKFVLKPNREGGGNNFYDDEIPKKLQLIKSAQELQEFVL…	0.8
	A11, 7, 10-13, 16, 17	74	EZ759412	contig02760:1:1133:2|similar to Endoplasmin (P08113)|Evalue: 2e-101	488	42740	10 (9)	29.4	377	4.89	SLEFHTDFRGAVPTTHRPKAERIAALTEVTMRRATWIALFVTCFLXLGPLKTRSEDDLDSDDVEDSEAKVANSIGKKADGSRTDDEVVSREEEAIKLDGLNVAQMKELRAKAEKLTFQAEVDRMMKLIINSLYKSKEIFLRELISNASDALDKIRITSLKDSSVLSATDELSIRIKADKDNHVITITDTGIGMTRDELIKNLGTIARSGTSEFFQKLQESSTSEANDLIGQFGVGFYSAFLVADRITVISKHNDDKQYIWESDASTFSIAEDPRGDTLKRGTQISLHLKKEAYDFLEESTIQDLIRKYSQFINFPIYFWTSRSETVEEPIEDDSTTDKPTTDTKSEDEEVKVEDATEEKKAQTKKTEKTVWEWKLMN	0.95	2.67
	A16	38	EZ762855	contig25687:1:486:1|No Annotation	488	17447	15 (10)	41	161	7.98	GFPKDDKDVEPVLKEHLVRKIYGLEEVKADEAGFTDAIKAVYGDNEIVFDKIPVDSKKSNLDNLKAYLTGIKTDKIKDDEADAKLKAIRDAVKVHNEKKTKETLEEVKKAWLHKLKGDASASGNGSGLPGWAWGVIIAGAVVALAGAGYGVYRFMQKGGSN	7.39
	A5, 4-7, 9, 10	25	EZ760468	contig09625:1:2318:3|similar to Dolichyl-diphosphooligosaccharide--protein glycosyltransferase subunit STT3A (Q5RCE2)|Evalue: 0.0	487	88165	13 (10)	16.1	771	8.07	CWTREIGSDMSSSKSTTVHTRTHTSSTEHSDRSGHVSTKTHKEKHEAVTPLHNGAVSTSLFNVNLSLSAEQQELYLKFLILFISCIMSFSTRLFSVLRYESVIHEFDPYFNYRTTKFLAEEGYYKFHNWFDDRAWYPLGRIIGGTIYPGLMVTASAIHYVLNALHITIDVRNVCVFFAPLFSSFTTIVTYLLTKELKNSGAGLAAAALISIVPGYISRSVAGSYDNEGIAIFCMLLTYYFWIKAVKTGSVYWSAACSLAYFYMVSSWGGYVFLINLIPLHVLALMITGRFSHRIYVAYSTVYCIGTVLSMQIPFVGFQPIQSSEHMAAFGVFGLCQIHAFVEYIRSKMSKEHFEVLFRSVVMAIGGVLLFAGIILSITGKVAPWTGRFYSLLDPSYAKN…	0.61	1.42
	A8, 9	63	EZ763118	contig27035:1:393:1|similar to Carboxylesterase 2 (O00748)|Evalue: 6e-26	486	14709	18 (8)	77.1	131	6.47	HGIICMQLDMKMAGFPERNLTRTEDCLYLDVYTPPLESSQTEKLPVLFWIHGGGYAFGDKDFYNATELVKGVKAIVVAVNYRVSIFGFLSTGDKAAAGNWGLYDCKLALQWVHTHIGKIGGDNKKITIFGE	6.95	12.41
	A9	70	EZ760302	contig08317:72:2177:3|similar to GMP synthase [glutamine-hydrolyzing] (Q4V7C6)|Evalue: 0.0	485	79072	10	20.3	701	6.08	MSQNAHLTGMSADATANGLEGSVDKVVILDAGAQYGKVIDRRIRELYVCSELLPLSTPLEEILAKNYKAIIISGGPHSVYSEDAYQYDDKIFQNTIPVLGICYGFQLMIKVYGGLVGKNLMRRNDGQSVIQVDNSSALFRGLNSTQHVLLTHGDTVQQVPNQLKVIAHHDNLVVGISFEEKRKYGVQFHPEVDLTVCGTDMFRNFLFDIAGCKPNFVMLNRELQCVDMIKKTVGDQKVLLLASGGVDSTVCAKLLQKTLKSDQVTILHIDNGFMRKGESKNVTQLLMGLGLNVTVHNASETFYTSRRVREEDAEVEQNFTVAGSPLELNSPMLCEVIDPEEKRKIIGDTFVHVADEVLKSMSLNLNEVLLCQGTLRPDLIESSSKLASSFADAIKTHHN…	0.44
	A13, 12	55	EZ759847	contig05185:1:1054:2|similar to Alcohol dehydrogenase class-3 (P79896)|Evalue: 1e-105	485	38648	11 (9)	36.9	350	5.62	LCHTDQYIWTGNDPNAAFPMILGHEGAGVIESVGEGVDDLKPGDHVIPCFVPQCYECEYCKHEGTNICQALYETQNRGVLADGTTRFKCKGTQLLLGMGCSTFSEYTVVMAISVAKISEKAPLHKIGLMGCGIPTGFGAAVNTANVKPGSTCAVFGLGAIGMACIMGCAERGAKQIIAIDPSKERGELAKTFGATDYINPSDYESIIPYFNKPLQQVLVFDKTNGGLDYTFECVGEVKPMRTALESAHKGWGKTVLVGLAPGKEEFCTRPANFINGRTLTGTLMVTTAXRDSLPKLVDDYLAGKIKVDEFISHNVYLDDINDAFDYLAKHDGIRTIIHMDRSTIPPNKDK	1.1	1.28
	A12, 4-6, 8-12, 14, 15	66	EZ761943	contig21997:160:1444:1|similar to Dolichyl-diphosphooligosaccharide--protein glycosyltransferase subunit 1 (Q4R4T0)|Evalue: 1e-111	485	48432	14 (10)	25	428	7.74	MAHCLLILVLCFTAASFAEETVNPAIVNADVERTLDVSTQLMRVTDLVQLEVAGGSSANSFLYSVDPSLESHLSYIDAKIAGKDKASSKALEVERVTVKNHASVAFYRIKLQNAISGLSSEKIRITTVYTKVQQAYPSEITQLEPQLMQVQSNLYYFSPYQTRKLNVKVQLPSAKLESYSQEPKPVTQTGKEIKYGPYEKLAPFVAQPLTLHFENNAPFLTVKNLLRWIEVSHWGNIAIEETIDLTHEGARLKGQFSRLDYQRGLTSKSSVGEFKTVLPAAAKDVYYRDEIGNISTSHLRKAXXTAMELELRPRFPLFGGWKTHYVLGYNVPSYEYLLKSGSKYLLQIRLIDHIFSNQYVENALVKIVLPEGASNIEIHSPYRVERLADEKHFTYLDTS…	1.07	3.48
	A17, 15-20	26	EZ760305	contig08352:51:734:3|similar to Ophanin (Q7ZT98)|Evalue: 1e-24	485	24894	19 (9)	49.3	227	7.67	MLRIAFIVLLAIALVAGESEEEHNGGQHEGDSHGIADLIHNNPILPKITDNLMKKDVPAMRAAGSQETSVAAIQKVIVDEHNRFRKAVVPKAKSMPTMTWDPKAAEKAVAWAKKCKWGHSPGEHRTTSDGPCGENIAMNTGGADWAKSIGQWAGEAKDYSYASNSSPNGAVVGHWTQMIWAKSVRIGCGYSKCTTGSPFGGSEPWHYFVCNYCPPGNMMGQKPYEQA	2.53	5.64
	A15, 14	37	EZ762205	contig23244:191:1180:2|similar to Serine/threonine-protein phosphatase PP1-beta catalytic subunit (Q6GQL2)|Evalue: 6e-176	484	38299	10 (9)	32.5	329	5.94	MEQDKIDVDSIINRLLEVRGSRPGKAVQLTENEIRGLCLKSREIFLSQPILLELEAPLKICGDIHGQYCDLLRLFEYGGFPPEANYLFLGDYVDRGKQSLETICLLLAYKIKYPENFFLLRGNHECASINRIYGFYDECKRRYTIKLWKTFTDCFNCLPVAAIIDEKIFCCHGGLSPDLQSMEQIRRIMRPTDVPDTGLLCDLLWSDPDKDVVGWGENDRGVSFTFGSDVVTKFLNRHDLDLICRAHQVVEDGYEFFAKRQLVTLFSAPNYCGEFDNAGGMMSVDESLMCSFQILKPSEKKAKYQYGGMTSSGHSGRPTTPPRNQKNKK	1.29	1.8
	A13, 7-13, 15	56	EZ759053	contig00854:1:1427:3|similar to Endoplasmin (Q95M18)|Evalue: 1e-143	484	54510	12 (11)	25.5	474	5.43	LKPIWTRKAADVTEEEYTEFYKSFTKDNDEPLTKIHFTAEGDVSFKSILYVPKRAAGDMLNKYGTKTDNIKLYVRRVFITDDMHDIMPKYLGFIRGVVDSDDLPLNVSRETLQQSKLLKIIRKKLVRKVLDMLKKLDKSELESFWKEYSTNVKLGVIEDAANRTRLSKLLQFQTSHSKTDLSTLTEYVSRMKPTQXTIYYMAAADRDEAEKSPFVERLXLKRDYEVLYLTEPIDEYCMQSMPEFESKKFQNAAKEGLKFGDNQKAKQKMDELKATYDPLTKWLETKVLKDKIEKAVISERLTESPCALVAKSFGWTGNMERIMKAQAYAKAQDATANFYAGQKKTLELNPGHPIVKDLLRRVEEDETDEMAENIAQVLYDSAAIRSGYQISDSVGFFTR…	1.02	3.04
	A6, 4-19	34	EZ761288	contig18438:8:349:2|No Annotation	484	12958	42 (6)	61.1	113	8.58	MFYKNSLTGLCGNNNGIANQDDVLPQSADGQIERAEDEYEWSRAYLLQEGSCNAQIPQDKKVNFRQSKSPQGSMQKKFGNNIGQNIEKYFKSSGRDQQRPSQSEGRDNKRMLI	52.28	164.93
	A14, 13	49	EZ761118	contig17631:79:1149:1|No Annotation	481	40193	10 (7)	29.2	356	7.75	MTILAIACAVQGIQQRIQQRIQQRIQQRMVGDMCDATDLPCTRSGMECKTLQGTQDPTCQCKAGFDLVDSADPWDARCVPQAAMTLEKTECERDADCINHENTVCRLLTGTKRCLCKGTGTEFVPNTAGVANIACIAYDCTVQQNCQSVISGSTCSLISKRCECPPQKLVSENPAGSGKICSDANALTCTSNSACVNMIGGAVKCEGLVLSATNTVQTAGICKCTERATSIALDPLTQKPVCRMNTIQSTCAGPNTDSCPAERNLQCIRLSASNRNVCMCKQAYRPLKGDTSQCEFAGLKCCVSDSDCGYYPTAISPDNRLKCIRVTSGLERGVCACAAGLYFDGLTNTCTNSCTR	0.88	0.96
	A19, 17-20	20	EZ762688	contig24984:2765:3460:3|similar to FMN-dependent NADPH-azoreductase (O07529)|Evalue: 2e-08	481	26030	17 (10)	44.2	231	9.19	MASVLKQIFSQHLHRPALLICKAQLASVAQKMATERFNFLVFLGSTREGRMADRVRVFVEEQLKARGHTYEIMDPEKVDVPLLKQAIHFYPNPNDAPENLKAINEKIQKADGYIAIAAEYNSGISPPLANLMDHFPPTSYAYRPSAIITYSMGQFGGIRAAMQLRQFLSELQMIHVPAIMTIPKVHENIDESGKTTNAYFNKSIEGLVKQLEWYAGALKKQRDTVGIPQSK	3.24	6.4
	A12, 14-19	67	EZ762409	contig23963:1:1373:3|similar to Adenylosuccinate synthetase isozyme 1 (A5PJR4)|Evalue: 6e-156	481	50499	17 (9)	25.4	456	8.02	KASLGNLIXXPLRNHRGLKMSTLSKVTVIVGSQWGDEGKGKLVDLLATKADVVCRCAGGNNAGHTVVVGSTEYDFHLLPSGIINPQCKSVIGNGVVVHLPGLFEEITKNEAKGLSGIRERLLISDRAHLVFDLHQNVDGMQETEKGTKKLGTTKKGIGPTYSSKASRQGLRICDLIGDFERFSEKFNVLVRSHKQAHPSLEVDVEAELARYKTFAEEVRPMVTDTVYFLHQKVHDSKRHCILVEGANAAMLDIDFGTYPYVTSSNCTVGGVLTGLGIPANTIGEVYGVTKAYTTRVGDGPFPTELTDETGQGMQKRGAEFGVTTKRPRRCGWLDLMVVKYTAMLNGYTALCLTKTDILDVLSEIKIGVGYRYNGELIKSFPAELTVLDKVEVEYVTMKG…	1.14	1.56
	A9	71	EZ763177	contig27439:52:1863:1|similar to Signal recognition particle 68 kDa protein (Q9UHB9)|Evalue: 3e-98	480	69627	8	16.6	603	8.93	MASHKEEGRENVEESEEQRAEGKEDEEAIEETVDVEPFSLEVLKIVKEAQQIRGLRHSDYFRYRQYCGKKLHRLRKALRFPQGTRSRYQGKKLTPAMVKDVRFLYIPLFIAERAWSYGMQLKQEANTEARKKFHMIRKFGRAASWAEELFRLCREVKVDARTKLEVEAYSQWMRGVFFFHKNMWPQALQSFTDAKTIYEKISETLDEETRIYYRQRIDETTPQIRYCAYNIGDESAVEDLIKLRVKPGAAMDEFSKLDDLIAQSREKQSQAEVKWLGRSIVVKNAKVRVLLINLQELEKQIDTVEFADQKLEVMENITNMLREALQYVQEDMKSYAKEQQTISSGGQVSSVQFLHSYLTYLKNRRGIDRALLTINIMNNEASLSPENEKEEKKKKHKPQ…	0.45
	A7, 7-11, 19	50	EZ759389	contig02653:162:2573:3|similar to Aconitate hydratase (Q4JVM4)|Evalue: 0.0	480	89113	11 (9)	17	804	5.44	MKDSLHILYPKNPYKHTISSVRVGDETFQYFALDKVNSEASDTIKRLPFSIRVLLESAIRNCDEFEVTSEDVERILSWEKLQKQSVDISFKPARVILQDFTGVPVIVDLAAMRNAVESLGGDPNKINPICPVDLVIDHSVDVDLARVPDARAHNEEVEFARNGERFQFLXVGAKAFKNLFICPPGSGIVHQVNLEYLARVVFESDAGFLYPDSVVGTDSHTTMINGLGVLGWGVGGIEAEAVMLDQPNSMVLPEVVGYKLIGKLAPHATSTDLVLTITANLRKLGVVNKFVEFFGEGCAELSISDRATIANMAPEYGATCGFFPVDERTIAYLFQTGRNDRKLAVIEAYCRANNLFRDFRNPSEDPQFSQVIELDLSTVEPSVSGPKRPHDHVTLSNVK…	0.43	0.69
	A19, 16-19	21	EZ761728	contig20456:1:386:1|similar to 40S ribosomal protein S9 (P29314)|Evalue: 4e-63	479	15006	15 (10)	48.4	128	11.69	LAKMRKAARELLTLEEKDPRRLFEGNALLRRLVRIGVLDEGRMKLDYVLGLRLEDFLERRLQTQVFKLGLAKSIHHARVLIRQRHIRVRKQVVNVPSFIVRLDSQKHIDFSLRSPFGGGRAGRVKRRN	6.73	10.22
	A8	64	EZ762912	contig25941:66:2108:3|No distinct annotation|Best-hit: Whey acidic protein (Q9N0L8)|Evalue: 1e-12	478	75372	12 (11)	27.2	681	6.75	MVALGRVILLVALCGVCVSANKPGRCPSISVTSADDPFERCEKTCEDDDTCSGSQRCCVIGCNQLCMDALPDIPVQDIPIKAGTCPKPTGVGTCVEECRSDWSCNSTFKCCSNGCGQTCQKPTTTSKPGTCPRIQQSGICSFQCADDTSCEDDEKCCATSCGGRVCSQPANLLKPGVCPLSSPGTNEPCSVQCSSDGSCNGAQKCCDTWCGGRVCKELPPPPVEKPGTCPTVLPGTVGVCSTSCNIGNDARCELDKKCCKTGVAAEHVXFPAPVTKPGKCPAVPSNINILCAVGASNKSCSSDGSCGRDLKCCSNACGGTSCQEPAPVVKPGSCPADILTSSVRPTQSCSSDASCPNNQKCCNIPGGKWCYNPAPIVAVKPGVCPVFPPPFVPCSLAGP…	0.53
	A11, 10-12, 15	77	EZ762081	contig22706:370:1401:1|No Annotation	476	38332	10 (9)	29.2	343	7.88	MPLAPLPPNPNVRPQASGAAQASDNNPMGVDFNVAAFCTFTSDHSYTCKMDCDDDTISKNISDKPGFSFQDRNCRKDIRLTNTRWSAEENIMIAYVPDGAKQIVGTCSFYKSLWFECFGVADCSRGDQGLYTCGGGAPWRGFYEGTPQTGFRGNVTAQAQNSPGVGPDRGPAGSRLPPPVSVGPTPVNPLLNGNRTLLASCEKFSAVELYSCYRFSRRCVTPLAGRSSITANTGSQTSGQQQKTHIRWQSANANKTGCSLQRSPMFNTTDNIQTFIRFENILRLLDDRSFVDANPLVTCYFYDNNEFSCGFPSQIDFKESTIANANFSQPTGSFYNGNINRAQ	0.94	2.61
	A15, 5, 14-19	40	EZ758933	contig00193:1:747:1|similar to 60S ribosomal protein L6 (Q6QMZ4)|Evalue: 1e-47	476	27047	16 (9)	35.1	248	10.61	SADTSKSAAPTAAAKVTTKSASNKSTKKSTTKTATSKSVGGKKGAERKTQKTIGGAKNGGTRNVIKKRSPRFYPTEDSRRGRSAVKAQQKKSGKVTNHSKKLRASITPGTVLILLAGAHKSKRVVFLKQLASGLLLVTGPYKVNGCPLRRVNQRFVIATKTKVPLDGVTLPKGINDAYFKRITKKAPKDSGLFDQKDEGYKASDKKIADQIEVDTQLLKAMKTDKMLRGYLSTPFQLKKKEFPHKMVF	2.59	5.08
	A15, 14-16	39	EZ762161	contig23004:1:974:3|similar to Peptide-N(4)-(N-acetyl-beta-glucosaminyl)asparagine amidase (Q28YQ7)|Evalue: 5e-26	476	37038	19 (9)	35.9	323	9.23	LQFYRRMFVLTLNSEAKHSLKFTRSLLTFAAILIRVLRRHSTPLYIDKMSYQPPYNPAYPSPYPAGMVPQSGQYPAYTATGYPATYAQPPAGMVPPAYPVYTQQNYTPAAYPAAGYGQPAGAIYPQIPHYNDNRQWPVGAVQGYVLEPTEEEVKHGRIELKYSTAKDKYIRVTEQNREIPGWKSLVYSEQNMAHKVESDWKMAYLARQPGTDFARIEWRFDLTRYGKKVKELHIQFPTKLYEDGYVNAFVLGNGAHINLKSSDKSQELSNAKGLEKFSLIAELSHGKKDVAWQHAQLFRHSTEPGFFATDNDLFPFKVWVYFY	1.56	2.79
	A5, 4-13	26	EZ762029	contig22423:50:1672:2|similar to Beta-1,4-mannosyltransferase egh (O01346)|Evalue: 7e-74	475	61730	10 (8)	21.3	540	6.76	MPPKEISHSSKKNDDSAIQQDHMWSTIKHVAHIALCIAIIGFFEYHFGALPFFGPNDDDSDAKVTTHAHTSHGHSERGHSDHRSHKHAHIEVEDLEVDRSETGPGFLMLNLIFISRALTLLWLPQYVFTFCGLTLYNCFRRRFRLNYDLTGTPMIYFRVVTRGEYRNLIRKNILENLRILQSTGLENYLLELISDNEVGVGEQQKFVERVIPPDYSTKSGVLYKGRALQYGLDHPVRPDAVNRGAWIVHLDEETLLTEEVVKGIVNFICDGEHDFGNGLITYATPPVPSWITTICDANRIADDLGMFRFQFKSFKKPLLGWKGSFIVASAAVEQKMGFDSGNASSGGVSTTEDQYFSLIASKLNYRFGWIDGGEMHEKSPFSLIDMIRQRARYLQGGRW…	0.68	3.75
	A16, 17	42	EZ762665	contig24912:1:669:1|No Annotation	475	25534	11 (8)	33.3	222	7.91	MPKDEGWNAGAVGLQYNCPTSPCPTLSYGQFINKTFPQAFTGSTRMSTDDQITSRMCDRAESAHIKCLMEVGMKCYQKTPNSGVYNEIVRTMVNYVQRFCMNTKASKDYQNTFKESPCFDDHSDEEKKCADDILKKLPSTSATNVQLCKAYDEVAECDYKAYRKVCDEQSARFKQSIMKFVFQGFKDKACPAGSEVPTARLSDPVRPNPVSKGAFGEFNSVS	1.67	1.95
	A9	72	EZ761907	contig21639:1:2042:3|similar to Nephrocystin-3 (Q7TNH6)|Evalue: 2e-13	473	78681	10	17.1	679	5.71	LTVLFGQCFALSVDISPYVYTYSGTPFYVSERQVLRELHGFLTDEQCPDPNTQVISVFHDHVAVADRDQWAPQNLKLEFLHQEFVVFNRTLGMQHPDTMSALYSLVDGHNEARNYAKMTKYGELFLRTAEINQRDDVQLMVEISMKLGNAYLNLQNSDRAHESYLKAYGLITTENVEFDTQTLKDIAEALGSFGEHKAVIEILEKIFQMEKAGLKEGDTKLKTALLDIAKAYDRSGDLSSAKTWLQKALQLDWIFEESRVVMVKHITEYAEVAYQLADVYRRGNELFEAIATYKEALQALTGNGFEIFGDITCRIFNGLQASYYRAGQTVQWIEALEKLLDCHSRLPDPMHERLASTLQHLGLAYQHQKDHSDAIKVFGILLSIYEKRYGPNNHHSIDV…	0.5
	A4, 5, 8	21	EZ760252	contig07950:1:943:1|similar to Laminin subunit gamma-1 (P15215)|Evalue: 6e-22	472	34189	7 (6)	29.6	314	4.67	KDDADKAYDEALDTYTRVNNIQLPEFNIPLLIVQANDIGSNAQTITNSSHSLVDIHNDLIDQVKGQLSDGSSLLMQGTALQQDTDDMLAEVDRARGDAAKAIERAENTLQEATNTSNTLQQFHVIARQNEAAARGRVAEIPSINRAIDEALRRNDEAERALLEAKATAERSKDTALMAQTKADDASKMAKKVREDSSDAKTVSLSLRDQASSLASDVSETNTEFVKMAAQARADETSVKDAIVRSSQAEAKARQXAGTAAQAVTSVDDMLYQLDSLQGIEIDRLLALESELQRAEDQLATANLETRLKKLEVTR	0.74	0.94
	A12, 11, 15, 17-19	68	EZ759216	contig01757:1:876:1|similar to Adenylyl cyclase-associated protein 1 (Q01518)|Evalue: 1e-58	471	32751	9	44.3	291	8.45	KEMTDAGQFYSNRVLKEYKDKDKLHVDWVRSWLDTLGDIYTYVRKYHTTGISWNARGQDYKYXKVASSAADARAALLDDLNRGADVTKGLKKVTSDMQTHKNPNLRSGPAPTGPQSHGGQQQSYGSHGMNQADSPPKTLLNGKKWEVENHKGNKNILIKDTSMNQTVYIFRCTDSLIKVTGKVNSIVLDHCNKSSVVFDSVVSSVEIINCQRTQLQVLGKASAVAIDKCDGVQIYLSPESMDCEIISAKSSEMNVLIPDNDDYVEVPVAEQFKSKWDPRTRKLVTQVNEAI	1.39	2.61
	A12, 17	69	EZ761705	contig20314:1:1571:3|similar to Tyrosyl-tRNA synthetase, cytoplasmic (Q5ZJ08)|Evalue: 5e-138	471	58941	10 (9)	22.4	522	8.07	SKLTVEMASTTDASAKAATTDAEETVQGDLWQEKIDTYLKTIPDASADAISRLNLVTRNLQEALGIETLVDIVVKEQRDLRLYWGTATTGRPHIGYFVPMRKVADFLKAGCHITILFADLHAYLDNMKAPWELLALRTQYYECVIKAMLRSLQVPLEKLTFVRGSDYQLSREYTLDMYRLSSKVTEHDAKKAGAEVVKQVENPLLSGLLYPGLQALDEEYLKVDAQFGGVDQRKIFTFAEKYMPQLGYKRRIHLMNPMVPGLKGSKMSASEADSKIDLLDSEADVKSKLKKAFCAAGVVQDNGVLAFAKSVIFPILKETFGETEFVIERKPENGGNLTYATYEELEKFFATGDLHPADLKDAVGKFINRLLKPIRDEFESAELKELTAKAYPSTTVTVT…	0.72	0.78
	A5, 5-10	29	EZ762387	contig23870:1:1221:3|similar to Vigilin (Q8VDJ3)|Evalue: 1e-76	471	45261	11 (9)	25.4	406	7.31	DHSTISKMNNNHNDSGVMSYTEAFPPLPETSVANGGPQTAQQAWRPAVAAQATNVTETVHIPYVERRKGDFGGNATEMNILSEIMRETGTNIVMTTNKDASLTLLITGKRDSXSHAKNDVLRCFKTQANATLPVPKEYHRFILGAKGKSLQELEHQSGTKISVPRADDASTEIRIVGPKEGIEMASRRIREIYAEQSKRAFEKLDIPKNFHPFICGPYNSVIDNLQKQFTNAEAKTELRINVPPPMVQNNVITISGDKEGVMYAKEVLEKSYREFAEKVKEVVLDNIPKSQHRYVQGPNRSAHLHEILAQTGVWVEVPPIDSESSKITIRGEAKNISKAMPLVFARADSGVKTELDAPRWAHKFMIGKGGEKIRALSDQYQECNINFDSENGKITIEGP…	1.17	1.85
	A5, 3-11, 13-17	30	EZ762032	contig22430:1:860:3|similar to Calcium-transporting ATPase sarcoplasmic/endoplasmic reticulum type (Q7PPA5)|Evalue: 1e-131	469	31615	6 (5)	22.1	285	4.87	DAPALKKAEIGIAMGSGTAVAKSASDMVLADDNFSSIVAAVEEGRAIYNNMKQFIRYLISSNIGEVVSIFLTAALGMPEALIPVQLLWVNLVTDGLPATALGFNPPDLDIMDKPPRSSKESLISGWLFFRYMAIGGYVGAATVGAAAWWFMAYPNGPHLTYYQLTHHLTCANEPENFRGVDCDIFEDPHPMTMALSVLVTIEMLNAMNSLSENQSLVKMPPWTNIWLCAAICLSMTLHFVILYIDVLSNVFQITPLNWTEWIAVLKISLPVVLLDETLKYMSRKL	0.65	5.17
	A12, 9-16, 19	70	EZ762863	contig25715:1:956:1|similar to Glucosylceramidase (Q2KHZ8)|Evalue: 5e-93	468	36070	14 (9)	34	318	5.44	TDFSTHIYSYDDIADDYGLFNFSLQSEDYTYKLPLLKSAQSMAPNGLKVLATPWSAPAWMKTNNNMTGSGSLKGKPGGPYFKTWARYLVKFIQSYENENVDIWGLTAQNEPVDGFIPRFPFQAMAFTAKTQRDFIAKDLGPELEKAQLRKVKLLILDDQRFMLPRWADIVLDEPEAAKYVDGIGVHWYLNSIASADVLTETHNRHPNTFLLSTEACEGTELFVKKHVELGAWSRAESYASDIIENLRNWVTGWIDWNIALSLEGGPNWVRNFADSPIIVNPDNDEFYKQPMFYALGHFSKFLPPGSKIIKASLARPSS	1.21	3.44
	A18, 17-19	23	EZ761897	contig21585:1:492:1|similar to 40S ribosomal protein S5 (Q5E988)|Evalue: 5e-88	468	18433	18 (8)	39.3	163	10.38	KDKYAKFLPHSAGRYAAKRFRKAQCPIIERLTNSMMMHGRNNGKKLMAMRIIKHALEIIYLLTGENPLQVVVNAIINAGPREDSTRIGRAGTVRRQAVDVSPLRRVNQAIWLLCTGAREAAFRNIKTIAECLADELINAAKGSSNSYAIKKKDELERVAKSNR	5.35	6.41
	A11	79	EZ763326	contig28286:1:1555:2|similar to Lipoamide acyltransferase component of branched-chain alpha-keto acid dehydrogenase complex, mitochondrial (P11181)|Evalue: 7e-129	465	57594	13 (10)	23.8	517	8.07	IVIYGPPYFDTTLHIVCSGIRMATNTVILTRPFQRCLTILLQSRKMHRVLTTHPTTLQPIDRDSRYNAMAFHTSSTLDAKKIVTMVLSDIGEGIAEVILKEWKVKPEAFVTEFDDVCEVQSDKANATISSRYTGVVKKLYHAVDDIVKVGSGLVDFEVDEESTTQTEPQIDVLEDMSSLRDDRSMPSYAKSIATPAVRRLAKAEEVQLSEVKGTGRDGRVLKEDVIKYLEQMKDMKSRIVEASSSPSDLETRSTFRSSAAESKAEKTKIAAYTSRPLDSAGRVADDITEPIKGIKKAMAKAMTASLQIPHFGYCDEVDLTHLVHLRKQLKELATARGINFSYMPIFIKAASLALSQFPVLNAHVDEKCENMIIKGSHNISIAVDTEQGLMVPNIKSVQL…	0.95
	A10, 11	74	EZ761509	contig19354:1:1352:1|similar to Cytochrome P450 18a1 (Q95078)|Evalue: 4e-37	464	50958	11 (9)	28.9	450	5.59	DHLSILNQTYTFGYLKAFVHKQFGAVLNLSGKMAKKSSWFFVDSFTIAITLFCIIIPIVLFYILWKTKNRKAFPPDVATAAPVTDEKAPLLSTTETRTAKNSAGVPSARDISAALENPHIALGEYAKTYGKVFRIAIGERYLIVINDAPLLRQIFECDESCGRDSQQIVARLMRSKGLTAAEGDLWKEHRPFAENTMNRCGFGMGKDWMQVVIQQEVQDMIDEMHRNEGTLFDLRKLVSINVANVMMALISGNRYDRSDQHFADVCSLSYEHPHFFDDAMMLKDYPKTAASPMDALSEEYAPFVKEFAKLMIFMQTQVDEHKSLSDPGSGLKDYISIFLSEEKKQKSSADKVSTFDNDQLVKSIASLFTAGTDAVVAYLXMGVMFMLENPDVATQVQQE…	0.87	1.15
	A5, 3-16	31	EZ762762	contig25317:1:1128:1|similar to Phosphate carrier protein, mitochondrial (Q8VEM8)|Evalue: 2e-133	464	42130	17 (10)	31.2	375	9.32	RLYILVEVPKENEKSLCRFQGPLIRDSYTAVTQLTLTTEASYKAXMSVSKYPLNAPKAAVLENYSCEFGSAKYFALCGLGGILSCGTTHTAIVPLDLVKCRIQVNPAKYQGIVTGFNVTIKEDGTRALARGWAPTFLGYSAQGLFKFGLYEWFKIFYHDMLGEERAYLYRTWLYLASSASAEFFADIALAPMEAVKVRVQTQPGWSTTLREGFPRILREEGIGGFYKGLVPLWMRQIPYTMMKFACFEKTVELLYKHVVPKPRSECSKGEQLLVTFAAGYIAGVFCAIVSHPADTVVSKLNQAKGSSAMEVAKSLGFAGMWKGLVPRIIMIGTLTALQWFIYDGVKVAFRLPRPPPPEAPESLKRKWAAEGKAVM	1.47	7.73
	A17, 18	32	EZ763222	contig27733:1:294:1|No Annotation	464	10656	20 (8)	71.4	98	8.07	VRCDKGASAADVKKLISDAARINTEKRIMSVDLTDINSAPGMFDAAKTLIKFLDFTRGTFDTAHIQGLTALTTLRLKDGTATIRAADLDTLTKLDSIY	20.99	29.46
	A11, 10-12, 14	81	EZ761362	contig18762:55:969:1|No Annotation	463	33512	12 (9)	33.9	304	4.99	MFSTLFVAALALSSVHAACKADDAKAQLAKGKRCCPEDLNYCGANLKSKMIKENCLDASFEPKEGHYYKCRFGQPFEFKPDRECQQCVITGVGLHDVCLRNMDTNKKVMDIAGWMRLANNTGKACCPDDVRYCGHNLLMKTDPTYCKINITETGFYECRDGQPKQLQANCNRCFVTGSGLNDYCVSDADINKKELNIGTKLESDNAGDELEPGVSSTLIKAQNDAEDAAASNSTIGGKSLDMSSADASMGGNATDVAGAEATDATDTQASDAAGAGAANATVKTSTVASRMKRDAESDRCDDPQ	1.57	2.48
	A16, 14-17, 19	43	EZ762053	contig22564:1:404:3|similar to Acidic endochitinase SP2 (P42820)|Evalue: 3e-16	463	14819	16 (8)	57.9	133	6.1	SISPVAGAYLHPALDKPGKVYSGRGYIQLTWSYNYKDASQALYKDDRLLEDPDKVANDEQTAWDTAYWFWAAKVHDQPGISEGKFGVSTKAINGGLECGGAANVAAAKKRFEMYKKIREAWKVEGVANEEGCY	5.38	7.35
	A4, 5	22	EZ760867	contig14497:1:864:3|similar to Sucrase-isomaltase, intestinal (P07768)|Evalue: 2e-57	463	32846	9 (6)	35.9	287	4.73	TQKVIWSMDVGAFIYADRYIEISTRLPSQDIYGIGEQTHNQFKHDLNYXVYGLFGRDQRTGSTNEITGGPENLYGVHPYYMAVEEDGNASSVLLLNSNAMEITFAPVPAITYRVLGGVLDFFIIVGDEPAHINXXLYFNLIGTPYLPPYWALGFQLCRFGYNTLENMEAAVTRTLEAQIPLDVFYGDIDILEDRRNFLLNTDTFSALPAFIQNRHEAGMRFVTILDPCMAVDLSNEPFKRALDYTDQPLFITWPQNYEDDNNQSYVHSNTHRHKYLQGVVWPSGRTV	1.16	1.37
	A7, 8	51	EZ760690	contig11786:1:1513:2|similar to AP-2 complex subunit alpha-2 (Q0VCK5)|Evalue: 9e-122	462	54681	10	23.9	503	6.69	VINRDDXQGYAAKTVFEALQAPACHENMVKVGGYILGEFGNLIAGDPRSSSQVQFELLHSKYPLCSITTRCLLLSTFMKFINLFPEIKGIIQDVLRNDTNIKSADAELQQRTVEYLQLSKIASVDILATVLEEMPAFPERESSILAKLKKKKELPDDVETPKEVKYVPHAIVNNSEAPSTPSGSVGRGASTDLLGLNSPIASAAPASIGAAYGMSAAATTNNTNMLIDVLDFGGSMSSAGQSMPGTMSPVLDGLGQSSGSPLVVGGANTRKFVFRTSGVLLENEMIQIGIKSQVTSAQATGQIEIYYGNKTKDIFQNFAVQLQNREEESLSVQLDKVGPSIMQSAQIKQVVSFKCNGPFFNVPSLTVSFVHLSGPVSIHMELPIFLNKFLEGAQMDSET…	0.79	0.91
	A13, 4-8, 10-20	57	EZ762129	contig22876:95:450:2|similar to Actin, cytoplasmic 1 (P68142)|Evalue: 3e-67	461	13132	87 (7)	74.6	118	5.46	MEDEVAALVVDNGSGMCKAGFAGDDAPRAVFPSIVGRPRHQGVMVGMGQKDSYVGDEAQSKRGILTLKYPIEHGIVTNWDDMEKIWHHTFYNELRVAPEEHPVLLTEAPLNPKANREK	31.46	75.63
	A10, 9	75	EZ761427	contig19010:1:747:1|No distinct annotation|Best-hit: WAP four-disulfide core domain protein 3 (Q8IUB2)|Evalue: 7e-11	460	28581	10 (8)	38.3	248	7.27	VELCSTDWSCEGKDKCCSNGCGHQCKAAAPTTDPVFELHPGRCPEFFSDATTGRCINECDIWFGDAGCVKSKKCCRKGCSQVCAVPTNVINPLNQTKPGECPAPPRPSGSCGQTCQDDSWCLGNQKCCQDFARCGRTCMKPLAVTKPGKCPAPKTMSFIPGRCTTECDADFEDRDCGGDAKCCVEGCSTFCRSPISVEKPGVCPKNLLPPGMATTCDVQCNGDDGCPGTKKCCNWGCRIICQEPLRTG	1.42	2.16
	A15, 14, 17, 18	43	EZ759906	contig05570:1:1084:2|similar to 3-oxo-5-beta-steroid 4-dehydrogenase (P51857)|Evalue: 6e-68	460	40998	15 (8)	27.2	360	6.84	YLDRCHFNTDRHFNSDIXAFFTSFPTNFPSTKMSAPQTSIKLHNGRSMPLVGLGTLQGTADEIKNAVKSAIDIGYRHIDTAFAYYNEAEIGQAVREKIADGTIKREDIFITTKMPSTYMTPERVEEALESSLRALNLDYIDLYLIHGPVGFAFINEKTAFPIDESGRLMTHKVDHLALWREMEKAVESGKVRSIGLSNFNKRQIQNILDNCKIKPANLQIELHLYLQQRKLTEFCQKNGISVSAYGPLGSPGIAPPPKQGEKALEPILQNQYVQSLAQKYKKSPAQVLLRWLTQREIIVLPKSTNKGRLQENFNIFDFELNPEEMKGFEGQDYGVRIYAQANVAGMAEAHEFPWSSRDEY	0.72	1.24
	A15, 14-20	44	EZ762890	contig25822:42:1055:3|similar to Probable succinyl-CoA ligase [GDP-forming] subunit alpha, mitochondrial (P53596)|Evalue: 2e-110	460	35753	16 (8)	40.9	337	9.2	MATACGVCRQTFRATAELIRSSTRSVSNASKSSYDNTRKNLKINKNTKVICQGFTGKQGTFHSKQALEYGTKVVGGTAPGKGGTMHLDKPVFNTVKEAVEALQADASVIYVPAPRAADAIIEAVDAEVPLVVCITEGIPQQDMVRVKNRLLQQNKTRLVGPNCPGIIKPGECKIGIMPGHIHKPGKIGIVSRSGTLTYEAVFQTTQAKLGQTLCVGIGGDPFNGTNFVDCLDIFLNDSKTEGIILIGEIGGTAEEIAAEFLKDNNSGPDAKPVVAFIAGKTAPPGRRMGHAGAIISGGKGTANAKIAALREAGVTVVDSPAQMGVAMFEEMKRAGKA	1.9	2.85
	A12	71	EZ759237	contig01873:1:1761:1|similar to Integrin-linked protein kinase (Q5R5V4)|Evalue: 9e-164	459	67491	13 (11)	21.8	586	7.35	FEYCSDLCCGILAFQIISFVRETKMAATRIQSTQGLEDVYQWIREGNAFSIRVWLDDTEHDMNVGDDHGFSLLHWASKEGNSSIVDMLLSRGARVNQTNMGDDTPLHLAASHGHRDITLKLLKYKADVNFVNEHGNTALHYACFFGFVDIAQDLLQHDAHLGICNKYGDTPLDKCRSVQMRQIIEDYARQLNIEVRRIPFKDQSMTGTKLRTKTLDRSLSRTSGIDIQNLSLNTQLATTPSGEIWKGSYQNKVIVAKVLRLREMTPRIPRDFNDEYPKLRIFSHPNILGVLGCWSQPPNLYIVSEYMPFGSLFDVLHRETGIVVDQLQALKFALDIARGMAFMHSLKPLIRRFYLNSKHVMIDEDLSARLSMADTRFSFQDKGKLYDPAWIAPEALQRR…	0.69
	A12, 4-9, 11-13, 16-19	72	EZ760641	contig11404:1768:2695:2|similar to Dolichyl-diphosphooligosaccharide--protein glycosyltransferase 48 kDa subunit (Q6GNR9)|Evalue: 1e-87	458	34474	15 (9)	44.8	308	6.79	IDDSDYDAKLDDSKEPHSTLIVNPDLLIQAPVIVGTNKKNPILFKGVALLPDNQNPLTLELLKAAPTTHSYLASSKAAGPVNKHIALIGGMQARNNARVVVCGSLDFFGNALFDASVNPSMASKYPLKSDKSGNAELALQLSLWAFKETGVLRVGEVKHHKASSNSTPSDYTIRDDCVYTIQIERKKEGSDVWVPYDANDVQLEFVRIDPFVRTTMKKDANGRFSAHFKVPDVYGVFQFKVDYERLGFTHLFSTTQVSVRPLEHTQYERFIGSAYPYYISAFSMIIGVFIFSFVFLSTKDEELKPKKE	1.5	4.92
	A7, 7-19	53	EZ760602	contig11006:1:669:1|similar to Staphylococcal nuclease domain-containing protein 1 (Q7ZT42)|Evalue: 1e-54	457	25204	10 (7)	38.7	222	8.76	NISESMVAAGLLEVKRGGRSDNVASNLAELEEQAKAEKRGRWAADASSHVRDVKWTIDNPRQFYEARKGKKIPAVVEHVRDSCTVRVFLVPDNAYVTLQMTGLRGPQIRQDDTKDEYAEEAKYFTESRLLGRDVEVILEGQNNQVFIGTIVHPNGSIAEALLREGFARCVDWNISSYTLGPEKLRAAEREAKSQKKRVFKNYESNVSEVKESERRYTAKVSK	1.71	4.71
	A19, 16-19	23	EZ763240	contig27809:822:1400:3|No Annotation	457	21769	20 (8)	60.4	192	6.81	MYTFMVLGLVFAVGSCQEAGFYRVETELVQLQNPMGVSHDGSPCDRMGVCDPKIKVYLDTDRPLAAFPGNRFTSQYDRVFAATDNNSPMINKQISRDICGGQFSKGNLRVQVTDDDTFLRLTDDHISDFECLFSPTPAEDEATAQWTRGASCVGSHNANKVKLFYNYRVFKIPQAECGRKSGIPPPPKPGRR	3.84	6.47
	A9, 12, 18	74	EZ759531	contig03403:1:1416:3|similar to Dihydrolipoyllysine-residue acetyltransferase component of pyruvate dehydrogenase complex, mitochondrial (Q8BMF4)|Evalue: 6e-108	456	50746	10 (9)	26.3	471	8.63	RNRNRVTSGKAVSKASGSQSDSGQRGSGQASSGQLGQSRANLPEHQEVRLPALSPTVETSTIKSWGKKEGDKVAEGDLIAQVETDKSTIDWNWENPEEVYVAKLLVPDGSADVPVGKLVAIFVSNQADIAAFKNFEASEQSSQSQQLQQPQDSQRQQLSAKADEQASDREQDKVTSAKPASGQQSSQRAQSQRDQGSRVFASPLAKNLASQKGLDISQIQGSGPGGRIIADDINKFKPSAATQVQPQVTTAKGAPTPKKQTSRDGEEATFTDIPLTNIRQVIAKRLLQSKQTIPHYYLSVDVVIDDVLTLRKELNEMLIKENIKLSVNDFIIKASALSNRKVPAANSSWMDTFIRQFNSVDVSVAVSTDAGLITPIVFNADSKGLADISADVIRLADLA…	0.76	0.88
	A11, 10-14	82	EZ762347	contig23728:238:1767:1|similar to 5~-AMP-activated protein kinase subunit gamma-2 (Q91WG5)|Evalue: 7e-106	454	56733	9	23.2	509	7.27	MKPFGSLTPNLKFDKNXKEKERSKEQRRHSCAPDISVTMSRANPISNVLNIGHSEDRTRHPSGSGSEYKISSPTGSARPGSVSPRLSMPSVSGASSSSSSTISDAPKAVIFRDADGEVHSLPVPEPLYEESEKVEYSFKDNLGVFARFMDAHICYDLIPTSSKLVVFDTQLSVKKAFFALVYNGVRAAPLWDSTKQSFVGMLTVTDFIAILHKYFETASIKMEDLEEQKIQTWRDVLKERQVQLVWINPDASLTDAIRALVQNKVHRLPVIDPATGNVLYILTHKRILKFLMLYMSKWMRLSSSDTPMNLPHNSEVPMPEILSKTVGELKHAIGSYENIETVTPETRIIDALTKFVHRRVSALPVVDSTTGRVVDIYAKFDVINLAAEKTYNNLDITIK…	0.66	0.9
	A17, 16	35	EZ761706	contig20315:132:1091:3|similar to Malectin (A9C3P0)|Evalue: 2e-45	453	36231	9 (8)	37.3	319	4.62	MELHRSLLQLHMANQILFAISLLSYLVMPLQRVAGQSTKLNVVFAINCGGETHIDTNGVEYTADPSKEGHASDYGTRWQIINNVRDPNDFPLYQTERYSESNFGYDIPIRESGNYVLVLKFAEVYFNQAGMKVFDVLLNGEHIVVDSLDIFERAGGRASAYDTYIPFKISGNRLLVNNGEESEVAGTIRIDFVKTSQDNPKCNAFYVVHGNVEDLPKIEVRSPVRDFEEEDFENQKILNHEFDTPNEDSVRFASGPALEEPEMGLDKYYPVIAVLLAVAILTFFVXKTLEIEVETIWTMNFGAFCIERSSIIDAILLLF	1.02	1.57
	A19	24	EZ761263	contig18316:344:775:2|No Annotation	452	16261	15 (8)	70.6	143	5.71	MPSSPCDTKIQGYVDVKTAERAWPGSKAVPSWPVLFQKADENSPHIDSIISEDYCSGKYQNSVLRLHVEDEDSMGMKNDFVEDFECRGSYAAAASEARAQWSEERTCNGIYQPSNTKLTYRVRAYTVAPDSCGRPLPSKIKKP	3.57
	A12, 13, 15	73	EZ760067	contig06628:84:1388:3|similar to Carboxypeptidase B (P04069)|Evalue: 4e-70	451	49241	8	27.4	434	5.87	MDLKLVTLCVLALCAAYATSEEEVHYQNYKLFATYPKTKSQNDFLIQLNEEFQRGVYGNQKMEVWGHPEKGVSPDPILVLSSPEFQPQLVFLLNLHGIKYEITIDNVEQTVMRERAATRSGPMEWTNYHRYAEIEEWIQEMGKALPGIVKLETLGLTYEGRNIYMFTIGKPRADGKTKPAIWVDSNIHAREFISSATLTFMLNEIFTKYSKDAEVTKMVDEIDWYVVPVMNPDGLEHAHTKERMWRRTRKVNPFNDCAGADPNRNYDHQWMRSGSDQAPCGQVFAGPYPFSEVETLLTTDKFLDLNKNGQIKALLTIHSFSQVWLTPWGYALEYPTDYQDLVKMGQEATAALKAVHGTSYRTGSSTALLGAAAGATDDWGKAKGGAKYSYTVELRDTGR…	0.68	0.82
	A11, 10	84	EZ759414	contig02775:57:1240:3|similar to Formimidoyltransferase-cyclodeaminase (Q91XD4)|Evalue: 5e-124	451	44644	9 (7)	33.2	394	8.71	MLSLLSRLTQTVLRQDCSQKRRTFYLKFQVRSLVFRRSDKMAPQIIECVPNFSEGRRQEVIDEIAAAIKATSGVSLLDVDAGKATNRTVYTFVGDADSVVNGAMNAAKVAQRLIDMTKQKGEHPRLGALDVCPFIPISNATMEDCVRCAQRFSERLSTELSVPVYMYGYASEKDYRREVPQIRLGEYEGLPEKLRKDEWRPDYGSPVFVPEWGATICGARKLLIAYNINMLATKEQCHRIALNIREQGRGPKELGRLRKVQAIGWWFEEGRIAQVSTNLTDLDVTTLHEVFEATAADAAQLKLALVGSEIVGLVPLKPMLDAAEFYMRRDGLFVLEEEQRVQLGVSRLGLNMLSPFDYKKRIIEYAVGATNIAGPLLNLKTFEFVNEVAARKAA	0.77	1.3
	A7, 7-11	55	EZ760459	contig09557:1:921:1|similar to Probable 10-formyltetrahydrofolate dehydrogenase ALDH1L2 (Q3SY69)|Evalue: 6e-74	450	34218	7	35.8	307	5.05	GLDTGPILLQKECNVESNDTVDTLYNRFLFPVGITAVAEAVDMIANNTYPPKVPQPTEGASYDPIVKRDTAKLRYDMTAEAIHNFIRGNDKVPGAWTIMDGQNVTLYGSELWYRSKPKGKEVSLEDGKTALVHSAGLLIFGSDNKAVNVKQLVMADGKMISASKYGQKEETIALSDLTHEEKELQNHILEIWTAILNIEISPETDFFKSGGGSMDVVRLIEEVKDRTGIVMVNDDVYMAPMYERFVTAAIIKSRSAGLVQTLQFDYKEVEVNKMKVKIPFDLFINNEFVPALSGKRLPTHCPSDESV	0.91	1.41
	A12, 5, 11	74	EZ761608	contig19871:1:1549:2|similar to Eukaryotic translation initiation factor 2 subunit 3 (P81795)|Evalue: 0.0	450	57269	9	23.9	515	9.26	LRNVFCCVFEKAELLIFSRTVFHQNLFGFQVSTVQRQPKWKALAIXPSSHLARQDLSTLDVSKLTALTPEVISRQATLNIGTIGHVAHGKSTVVKAISGVQTVRFKNELERNITIKLGYANAKIYRCDNPECPRPACYRAFGSNKEDVFMCDRQGCGGKFRLLRHVSFVDCPGHDILMATMLNGAAVMDASLLLIAGNESCPQPQTSEHLAAIEIMRLKHIIILQNKIDIVKESQAKEQYEQILKFVQGTVAEGSPIIPISAQLKYNIEVLCEYIEKKIPIPLRDFATPARLIVIRSFDVNKPGCEVDELKGGVAGGSILRGVLRVGQEVEVRPGIVSKDSEGHLTCRPIFSRIVSLLAEQNELEFAVPGGLIGVGTRIDPTLCRADRMVGQVLGAVGA…	0.65	1.19
	A13, 12	58	EZ759022	contig00650:1:1097:3|similar to S-adenosylmethionine synthetase isoform type-2 (Q4R924)|Evalue: 2e-149	450	40698	13 (9)	35.2	364	6.19	KLCDFISDSILDAHLIQDPDAKVACETVAKTGMILVCGEITSNAVVDYQKVIRDAVREVGYDSSDKGFDYKTCNVLLALEQQSPEISAGVHVNRRDEDIGAGDQGIMFGYASDETEECMPLTLHLAHRLTEKWGEFMKNGTFPWARPDCKSQVTVEYRLDNGACVPIRVHTVVFSGQHDPSIPLDDLRHFTIENMIKKVIPSHLITAETVYHINPCGTFIMGGPYGDAGLTGRKIIVDTYGGWGAHGGGAFSGKDYTKVDRSAAYAARWVAKSLVSAGLARRVLVQVSYAIGIAEPLSITVFHFGSSKYTEAELLDIVRRNFDLRPGVIVRDLDLKRPFYKTTSGYGHFGRPIFPWEMPKKIVM	1.36	1.44
	A12	75	EZ761271	contig18335:1:1523:3|similar to Homogentisate 1,2-dioxygenase (Q9VKJ0)|Evalue: 4e-171	449	58302	10 (9)	21.1	506	5.91	PQLKYLSGFGNEFQSEDARCPAALPEGQNNPQRCPYGLYAEQLSGTSFTSLETTIDALGFTXIRPSVLHKPFKPYPQNYIKHNWDDIPPNPNQLRWLPFQFPPDDKRVDFLDGLRTICGAGDPRIRHGSVIYIFTCNHSMADRAFSNADGDLLIIPEHGALDIMTEFGKMRVEPGEFCVLQQGMRFSVAVEGQTRGYVLEVFDNHFRLPDLGPIGANGLANPRDFQTPQALYEDRQVKDYQILLKFQGSMFVAHQTHSPFDVVAWHGNYVPYKYNTKNFMTINTVSFDHVDPSIFTVLTCPSEKPGVAIADFVIFPPRWGVADHTFRPPYYHRNVMSEFMGLIYGKYEAKEEGFMPGGASLHSMTVPHGPDFECFEKASTEPLKPTRVADGTLSFMFES…	0.64
	A19, 16-19	25	EZ762897	contig25846:101:733:2|No Annotation	449	24371	19 (7)	51.4	210	7.51	MRTITFLILCLYVSIGLCGLIDRAQDAADASRYREIRGFIRIEARIIRLDNPKGISHTGLSCDIIDKCDPKVIAVIDTEKPNHDFGGDSIPYRNYFTLFDGNDVDSPMINKLISRDICGKGVRKVAIRVRAIDKDMFNDDKIDNFKCFITGDSMPAPNVEESVWSPEQSCDGRDKKSIKVWVQWRWYFIPQSECRASSNGKAWFDGMFSK	4.3	5.48
	A19, 18-20	27	EZ760753	contig12425:1:708:1|similar to Bis(5~-nucleosyl)-tetraphosphatase [asymmetrical] (Q6PEC0)|Evalue: 8e-15	448	26891	12 (9)	33.6	235	9.27	TFYIYEFSKNNKCDETRFAESLYQYNHKPVVNWPFTLQKPYKTGNXPLRKKMGLHSDRGANAALPTGNRAAGHVVFKRNEKGQISYLLLLENYGEKHYVPPKGYINDSENEKEAALQHTLKETGLSSDDLKVFSDFSFKMQYGVRKQIMKIWYGLAELTTDKPVKVTGDAHNAGLWKGLSDAIKISGYVEAEALLKKADKYIQDNSPKTXAIASFAYHKMVVTKCDFNKIRDIEK	1.87	2.11
	A14, 13	53	EZ760306	contig08368:229:1212:1|similar to 26S proteasome non-ATPase regulatory subunit 7 (P26270)|Evalue: 9e-99	447	36873	11 (9)	42.2	327	6.23	MPVVSLEPAVKHVVVHPLVLLSVVDHFNRMKSVGNTRRVVGVLLGSLRHTTGELDVSNSFAVPFDEDDKNKTVWFLDHDYLENMYTMFKKVNAREKIVGWYHTGPKLSNNDLAINELFRKYNPNSVLVIIEVDQRKDELPTEAYIAVEEIRDDGTPVKATFEHVSSEMGAEEAEEVGVEHLLRDIKDTSVGSLSQQISNQLTGLKGLRQQLKSIIHYLAEVQNKQLPLNPDIINNLQDIFNLLPNINAPTFTSAVTTKTNDQLLVIYMSTMVRSILAMHNLIDNKLRNKSEIEKKVQEKADSLKKDKEKVADKDAKKDGVTSKKDGK	1.36	1.45
	A16, 15-17	47	EZ760718	contig11998:1:493:2|No Annotation	447	18926	12 (9)	42.3	163	8.87	KNLNKDSLSQTQFTELCTRSRGAVSCIDSFVNRCSLNVSSDVKTILTGTGQFLQFCDEPHAYQNISRFGACGKKMAAANVTCHETHKNLPSRFNPQQPASILQDRKLLTDLCCQIRRAAPCYIPKVQSICGSEDRKFFESMTNRLYDVYKCSSTFANCQSVQS	3.35	5.2
	A15, 14-16, 19	45	EZ763009	contig26398:1:666:1|similar to Guanine nucleotide-binding protein subunit beta-2-like 1 (P68040)|Evalue: 1e-69	447	25109	17 (6)	34.8	221	9.07	SHRSCGWDKLVKVWNLTNCKLKTNHLGHTGFLNTVTVSPDGSLCASGGKDGQAMLWDLNEGKHLYTLEAGDSINALCFSPNRYWLCAAAGQSVKIWDLEGKTVVDTLKPEIVQTAVNKNVTPQCLSLAWSADGQTLFAGYSDNKIRVWQVSEARVXXSVSRFYALLACLCMGKKEKLINFRRKNLSNTRCRRLVVRCQSLINASETRGSNGHECEIHVSIV	1.72	2.96
	A8	66	EZ760624	contig11209:1:1451:3|similar to Fermitin family homolog 1 (Q5R8M5)|Evalue: 2e-120	446	55920	9 (7)	21.6	482	5.8	PLYAEPQKATANIIDGALSDELMEVNLTRSPQNASRDASDTVLHPRNIVERARLNTAWLDSSLSLYEQGIRENNTILLRFKYFTFYDLNPKVDQIRINQMYEQAKWMILSEEIDCSEDEMMLFAALQLQVQLQSQVPQQVEPVPEDDIDAALNDLQTTLEGAATPEFYNEITQVPELRDYLNFFKPKKFTLKGFRPYYVVLKDTKLSLYKDEYSIGGEAYLQVNLRGCETIPDVVLHTGKYGIRLQVPMADGMQEMWLRCNNDSQYAKWMAAFRLASKGKTMADSSYQQEVQNILSHLSLQHTNTLQRTETRPNEANINPDNYVASRFMKRNKSNNKVVGRMMESHANVKSLSLVEAKMQYIKTWQALPDFATHYFVVHFAGSRKEELIAVTPNRLMRL…	0.58
	A19, 18	28	EZ759055	contig00858:452:928:2|similar to Peroxiredoxin-6 (Q5ZJF4)|Evalue: 3e-45	445	17552	16 (8)	63.9	158	5.66	MIALSCDDAQSHQGWIKDLESYCGMGGGKFPFEIIADPDRSLAIKFGMLDPDELNSNNMPVTARAVYVIGPDRKVKLVLIYPATSGRNFDELLRVLDSLQLVSKHSVVTPVDWKVGDKVIVPPNIPKDELATKYPQGVDVYPLPSGKEYLRFTTAPKS	5.94	6.96
	A8, 9	67	EZ762513	contig24351:140:1939:2|similar to JmjC domain-containing protein C2orf60 (A2RUC4)|Evalue: 9e-05	445	68502	8 (7)	15.5	599	4.67	MKFHLFTLLLLLLIQVWIVPSVTSSDRIPNNEDTEAEVSIEEEIDELSTSDDTIEEEPLEPLEPLEDIKAKWPTPELFSEDIEQWTGHQQPLGHLSPKMSIDRVRAFPSRKIFLEEYYVPRVPLFISSALQDTNVAKNWPKDSYFMTNAFAALTHINATLASGQQESMVLREFFLRRSWDKSVSLDTELPDFLRLEFPLPISVQCKPLLEQLRTSRFRVLGTASNKAVLSTDVDRLLCAVTGKKRVLLTSSAQILRDSGHSVEIPQTFPELDFRSVDFAKLPMLRFAKFMEVELSALDCLYVPQKWIAFENNSKPVMEAELTWTHVIVEPNEKVCGEPGNPQTTLALLAFKDQTDLDLQRIIKVAPLQQLLNGVKLKNFSYDQFENWLKTDKGVLSKMT…	0.39	0.65
	A18, 17-19	26	EZ761317	contig18594:48:710:3|similar to Proteasome subunit beta type-1-B (Q9IB83)|Evalue: 2e-51	444	24334	12 (8)	50.9	220	5.86	MAYFDPYDDNGGTVAAIAGTDYIVIASDSRLSTGSTILSRNTTKIYPLSSTALFACSGFHGDAITLVKNLEIKMKLYVHEHGEEMSTKALMALMLPTLYGRRFFPYYVRPIVAGLDRDGSGIVSSYDPVGTPEFFDYVIQGSAGDLIHPFLHNQIGPKRTLSDIPVQAPKELTAEMAVKLLKDAYLAAAERDVYTGDVVTIITMSKDKPRHSEQYQLRRD	1.8	2.56
	A19, 18-22	29	EZ760616	contig11153:105:404:3|similar to Glutathione S-transferase 1 (P46436)|Evalue: 2e-22	443	11707	17 (9)	76	100	5.15	MPSYKLIYFDARGFAEPTRFAFAYAGQSFEDVRMSREEWPTKKDQTPYGQLPILEVDGMKICQSSVILRFVGNRFNLNGRDEAEKLKGEEIMDYMKDMLV	12.28	16.9
	A5, 4-10, 16-19	32	EZ759796	contig04853:1:1782:1|No Annotation	442	64430	11 (6)	16.9	593	8.1	NRIERFCSLFQFYPFAKFKMASFVVLIGLCALAASSVSAQTPSSVTGVSNSTGANTNGSKVFDLFYKIQTNQIIGVRSCRNLADCGTRQRCDPLLHLCLPADYPALQEIEKSCHVDDDCSPLYSCIGYLCRFCGPKHCGANTDCCPGVPSGLQYQCLNTETLVREQVNSANKKKPTRAKREAEESSAEESESDSESESDSESGKEEKSSKKSESKGSKSKTDSKSEAKKGSSSKKSSSSGSKKEASSSKKESTKKEASKSKKPAKKAEEEPVEEEAATNEENEEPTSSKGKSSGSKASSSKKESTKKEASKSKKPAKKAEEEPVEEEAENEEPTQNEAETEENAEPTKSDAKSSKKGSKGKAKEAEDATASDNWGHSSSLNTWGSPNSANTAGATWGSQ…	0.49	2.71
	A12, 11	77	EZ759272	contig02055:1:827:3|similar to 26S protease regulatory subunit 6A (P17980)|Evalue: 2e-144	441	30584	14 (8)	42.9	275	5.57	MAEEEGANVDLDAQRKGKCAVVKTSTRQTYFLPVVGLVDPEELKPGDLVGVNKDSYLILEKLPAEYDARVKAMEVDERPTEQYTDIGGLDKQIQELVEAIVLPMTHKERFEHLGIQPPKGVLLYGPPGTGKTLMARACAAQTKSTFLKLAGPQLVQMFIGDGAKLVRDAFALAKEKAPAIIFIDELDAVGTKRFDSEKSGDREVQRTMLELLNQMDGFSSYADIKVIAATNRVDILDPALLRSGRLDRKIEFPHPTEDARARIMQIHSRKMNVDP	1.8	1.91
	A17, 16-18	37	EZ761111	contig17610:1490:2282:2|No Annotation	441	29169	9 (7)	48.3	263	7.83	SRALVLPLYANGFCYFDQLFRLDAAFGVLHYASDPFLNNRFPVLLPIDISAVISSLYKCRSTFNMTRASHTNSDRNQSSQQNQENVRGSNSANNSSDNPSQIYGAPNREYARDTDAFGGRWSATDDRNNWAQNRQSNQNQNQSSRFTGAGNQHQQWSQSDHRSQNQGHSSYGTYGQSDLGYGGQYESGQYQRNQQQGHNLNLVHAPSGGFRISGDSFDGQGLGRYSGSGTTEYGGSHGGYNAQRGHGDNDQYSGHSKFGSGRY	1.37	2.66
	A19, 17-21	30	EZ763146	contig27230:99:680:3|similar to 40S ribosomal protein S7 (A6H769)|Evalue: 1e-60	439	21954	15 (6)	46.1	193	10.13	MAYSQQAKIIKSGAEKATAFETQISQLLLELEVNSDLKQSLQELHINEAREVDLAGKSVVVLLVPPPQLKLWQKIHVRVVRELEKKLSGRPVIFIAKRRILPKPTRKTVKLNQKRPRSRTLTAVHENMLADIVFPAEIIGKRIRVKQDGSRLLKVHLDKASQTNVEHKVDVFAGIYKKLTGKAVQFEFPEPIF	2.11	3.88
	A14, 13	55	EZ760449	contig09521:127:1221:1|similar to GDP-mannose 4,6 dehydratase (Q8K0C9)|Evalue: 8e-158	438	41533	12 (9)	33	364	6.16	MSRFGEDRGGSGDGRRIALITGITGQDGSYLTELLLEKGYIVHGIIRRSSSFNTGRIQHLYDDPVTHHEGRMKLHYGDLTDSTCLVKIISEVRPHEIYNLGAQSHVKVSFELGEYTANVDGVGTLRLLDAIRTCGLDKTVKFYQASTSELYGKVQEIPQKETTPFYPRSPYGVAKLYAYWIVVNFREAYDMYACNGILFNHESPRRGETFVTRKITRAVAKIHLNLEESFELGNLDSKRDWGHARDYVEAMWLMLQQEKPDDFVISTGEVHSVREFVEAAFLVVNRRIRWQGSGVDEVGIEEGTNIVRIKVNPKYYRPTEVEFLLGDCSKAKSELGWVPATQFDTLVREMVDADVKLMMKNPSA	0.99	1.46
	A8, 9, 12	69	EZ763092	contig26897:19:1285:1|similar to Endochitinase (P36362)|Evalue: 1e-41	437	46747	7	27.5	422	6.1	MLTIAFVXLIIALFHAVETANVVXHVCTGEWAARRPAAEGKVLADELPAQACTHMVYTYAGIFEHQIVPMDYTVDMPAGPGNDSNNLGNLNRFASLKSVNPNVKLLIGVGGWNNGGWIFSDMAMTKSRRAKFIQSVIDFCTKYNLDGVFLDWMVPVLPDRGGSPMDRANYVLLLQELRSAFARKSRKLFIAITVSPVERNIVNYELSALNNVVDLMHAVTFDIYGLWNKMALPPDALFSDRLVNXKHGYRCATALEFGVSREKLVVGIPAYGRSYTVSDSIQAQVGMSALEAGNEQPISVTPGMFYFSEMCRLLASGGWRTVRDPTTKAVYSVKDDQMMFYDDETLVRDKSNYAKTNGLAGVYLFSLDNDDTKGFCGQPYPLLNAIVSTLGVGSKATIP…	0.61	0.75
	A10	80	EZ760595	contig10967:1:1363:2|similar to Acyl-CoA synthetase family member 2, mitochondrial (Q0P4F7)|Evalue: 1e-97	437	50715	8	28.5	453	5.65	KVEMKAIVAAEGVHTLKYYEHFAELFPDLSTQTKGKLKSQRVPHLSHIIMLTKRPDDFPGTYSLDEVLTMQKPENKPVLEQLLRDVQFDDPFNIQFTSGTTGSPKGATLSYYGLMNAAYFAGIRFEVPFIKDAVLVTGLPLYHVFGCVGCAVLTAIYTAPLVLPSERFDSEAILKAIEEEKANVLCGVPTMFSDIINHPNFDKYDTSSMSSAIMGGAPCHTALIRQISDRFRMNKFTCGYGSTEQSLVTFIGFMGDAQEILTTTTGYPLNHVEAKVVDAEGKVVALNTPGELWTRGFGTMLGYWNDPEKTAEVMAPGLWLRSGDIATLDAEGYLKIVGRVKDMLIRGGENVYPVEIENVLLKHPSVIEAHVCGIPDERMGEEIVAWLKVKQSEDVTDEQ…	0.65
	A7, 3-18, 20	58	EZ763018	contig26443:1:303:1|No Annotation	437	11655	84 (5)	44.6	101	4.72	FLIESAITEAIYKVTPKHQYAGSLVAFVNMTMTLLSADAQSQPIQFPEQNANIIDGLHMINPEFLEKRDEDSFLYETPEAQNPIVQKKQYWPYVDEKPRMV	9.25	54.39
	A11	86	EZ759280	contig02085:242:1257:2|similar to V-type proton ATPase subunit H (Q9V3J1)|Evalue: 2e-98	436	39522	10 (8)	35.5	338	5.67	MAALRTAEAAPHIPEDIENDTGVVAGTSAMAIKANEVRQNRINWQSYLQSQMISQEQFNIIMMLDTSAPPRKDQFLKEHKYECARTLLDMISNVAKDQTVQYLLTMIDDILQEDRTRVDMFHEYAKRQKTTVWRLFMPLLNRQDAFIVNQASRIIAKLACWSKEVMDGPDFHFYLTYLKEQLRLPNNEYKQSTARCLQMMLRLNDYRVAFAKVDGITTILNGLSANNNFQIQYQLIFSLWCMSFNAELAEEFYRYNVIPVLAMILNDSQKEKVSRIILATFRNLLEKPEDPQIIQENAVAMVHGKVLKNLSLLQNRKFDDPDINEDIQYLDEKLQASV	1.06
	A9	76	EZ759793	contig04837:1:1460:3|similar to Histidine ammonia-lyase (P42357)|Evalue: 0.0	435	52933	9	27.2	485	5.88	RSHAAGVGDCLPLHRIRMLLALRVNVLAKGFSGISLENLQKMIAIFNSSCLSWIPEIGTVGASGDLAPLSHLALGMIGEGMMWSRKTGWNEASTVLEANGLEPIILGPKEGLALINGTQMIAALGAEAVERANSVAIQADVIAALSLEVLKGSTKAFDASIHLLRPHKGQMAVAERLRALLHSNTYPSEIAMSHRFCDRVQDAYTLRCCPQVYGIAHDTIDFVKRILTTELNSATDNPMVFVDRGETISGGNFHGEYPAKACDYLAIGVHEIASMSERRIERLCNPALSELPAFLTNNGGLNNGFMLAHCTAAALVSENKVLCHPSSVDSLSTSASTEDHVSMGGFAARKALKVVENVERVLAIELLAACQGIEFLRPLQTTAPLEAVHKLVRSVVAPW…	0.72
	A12, 11	79	EZ761208	contig18035:30:1538:3|similar to Mitochondrial enolase superfamily member 1 (Q6INX4)|Evalue: 6e-171	435	56899	10 (9)	24.5	502	6.18	MASLTPSVAAIPPHHKVGGITIEQMHVHDIRFPTSLGGHGSDAMHTDPDYSCAYVVLQTNTAFEGHGHSFTLGKGTSIVISAIVALEHLVKGRDVHDIINNFGVFYRQLTSESQMRWIGPEKGALHLGSTAILNAVWDLWAKLEQKPLWRLLADLEPEKLVSAIDFRYITDAITPSEALQIFKEGKVNLEDRLDYILKHGYPAYSTSCGWIGYDSELLRMKLREALAEGWTRFKVKVGAFLEDDVRRLTVVREEIGYENLLMVDANQRWDVEESIVWMKELAKFKPVWIEEPTSPDDVIGHATIAAALRPYNIGVATGEQCSNRVIFKQLLQAKAIDFCQIDTCRLGSVNEILAVLLMSKKFNVPVCPHAGGVGLCELAQHMSFFDYLCVSRSLDNRVL…	0.66	0.78
	A7, 4, 5, 8	60	EZ762247	contig23393:1:2252:3|similar to 26S proteasome non-ATPase regulatory subunit 1 (Q5R5S4)|Evalue: 0.0	435	83416	12 (8)	16.8	749	5.41	IQHRQFRTEVFSKLVNLYMSLEPPDYISMVQCLIFMDRPEEVAATLSRLVEEDDXTINGDQLAFELYENGNQQLLSAIREALNKSNGENGAEMTRDFYXKLDQILSGKIVIELHLQFLIRNNHTDIIILKHTKEAIRNPVSHSATIISNAFMNCGTTSDIFSKRKLGMARSGDKLGEVLXXTASLGVIHKGHEKDALKLMSTYLPKDAGAGSYAEGGGLYALGLIHANHGSPEIVNYLKEQLASATNEMVRHGGCLGLGLACMATANDELYEILRSNLYQDDAITGEAAAVAMGLLMLGSHNKRAIEDMVTYAHETQHEKILRGIAVGIALVMYERLEEADPLIEQLMHDKDPIMRRCAVFTISLAYCGSGNNQAIRRLLHIAVSDTDNDVRRSAVTAI…	0.47	0.67
	A16, 4, 15-17	50	EZ759059	contig00880:106:1038:1|similar to Cytochrome c1, heme protein, mitochondrial (P00125)|Evalue: 4e-61	435	34930	18 (7)	33.9	310	9.03	MAFVSSAIVRRGNLRTVRALHTFAFKDLPTKKKFLWGTLGLVGTGAAALLYSLETSVVEATDLELHAPHYHWPHSGLLSTFNHESLRRGYQVYKQVCAACHALSYIHYRNLVGVTHTVDEAKAEAAAAQYQDGPDEEGKMFMRPGKLSDKLPNPYPNDAAARAANNGALPPDLMQMVLGRHDHENYVFSLLTGYTDPPAGVEVKEGQAYNPYFPGGLIGMPQQLFEEVPTXEDGTKATVSQQAKDVTEFLAWCASPELDTKKRYGLKIAIFGTLVLPFIWFWYRRKWTYLKARKAQYFVPPKARNRYNSP	1.47	2.33
	A17, 16-18	39	EZ762525	contig24378:1:870:1|similar to Ras-related protein Rab-5B (Q5ZHW4)|Evalue: 2e-80	434	31397	13 (7)	33.6	289	9.17	NXTVIRKVVERQRRWTIGASRAVDLEYRVSAHPIQFALDLTFYVSSLRKEPIXRVESMASQSRPNQGSAAPSGKIFQFKLVLLGEAAVGKSSLVLRFVKGHFHEYQESTIGAAFLTQTVCLDDTTVKFEIWDTAGQERYHSLAPMYYRGAQAAIIVYDITNHESFNKAKAWVRELQRQANPNIVIALAGNKADLNNKRMVEYEEAQAYADEQGLLFMETSAKTAMNVNDIFLAIAKKLPKTDATGARGAGQTVSVGAGAAAGQPKSGSCCGGGGSAAAAASDSATQPRS	1.73	2.06
	A12	80	EZ762801	contig25455:1:1318:2|similar to Ornithine aminotransferase, mitochondrial (Q9VW26)|Evalue: 1e-160	434	48871	8 (7)	23.1	438	6.57	KKMPESTKISTEKTDSREQSLMQKESKYNAHNYQPLPVVLAKGEGVFVTDVEGKRYYDFLSAYSAVNQGHCHPRIVKALQEQATQLTLTSRAFYNDVLGNYAEKITSLFGYDKILPMNTGVEAGETACKLARRWGYKKKNIADNQAVIVFAEGNFWGRTMSAISASTDPSSYRSFGPFMPGFHIIPYNNLEALEEVCKHPNVCAFMVEPIQGEAGIIVPDSGYLKGVREICTKYNVLFIADEIQTGLGRTGKRLCCDHENVRPDIVTLGKALSGGLLPVSVVLADDDVMLNIRPGEHGSTYGGNPLACKVAMAALDVLEDEKLSEKSEKLGKIFREELRKLPKNVVTEVRGKGLMNAVVIAEGFDALDICLKLKDNGLLAKPTHGDVIRLAPPLVMTEQ…	0.58
	A11	87	EZ759126	contig01241:46:975:1|similar to Protein henna (P17276)|Evalue: 6e-83	434	35246	9 (8)	37.4	310	6.38	MISTAATQATANMNGTSEHKRTSIYSGVDGADSVDYSRRNLRRMDSRGGQSSRGGSRAGSRMQSPERHQSDASIVFSLRESVGALSRALKLFEVNQVNLVHIESRPSKTNPGCYEFLVEIEDKLAPGYHSALKELNEQSVYVYVHTREQKAPTTESGILSTVPWFPRRIKDLDRFANHILSYGSELESDHPGFTDAVYRERRREFADIAYYYKHGTPIPRVEYSDDEIATWGIIFNELKALYPTHACKEFNYVFPLLVENCGYREDNIPQLEDVSNFLKDCTGFTLRPVAGLLSSRDFLAGLAFRVFHST	1.05
	A15, 15-17	46	EZ758939	contig00228:1:993:1|similar to Serine/threonine-protein phosphatase 2A catalytic subunit alpha isoform (P67776)|Evalue: 3e-175	432	38696	10 (8)	35.5	330	5.5	EIRKVESGESLSSSYGRRVVVMEEKSQWKELDVWIEQLNECKQLTENQVKQLCDKAKEILAKESNVQEVRCPVTVCGDVHGQFHDMMELFRIGGKSPDTNYLFMGDYVDRGYYSVETVTLLVALKVRYKDRITILRGNHESRQITQVYGFYDECLRKYGNANVWKYFTDLFDYLPLTALVDNQIFCLHGGLSPSIDTLDHIRTLDRLQEVPHEGPMCDLLWSDPDDRGGWGISPRGAGYTFGQDISETFNHTNGLTLVARAHQLVMEGYNWCHERHVVTVFSAPNYCYRCGNQAAIMELDDCLKYSFLQFDPAPRRGEPHVTRRTPDYFL	0.93	1.6
	A18, 19	28	EZ759540	contig03440:86:787:2|No Annotation	432	27037	8 (6)	30	233	5.6	MHYLRKTLLSCICLLLLEFVASYTIFKDPITLAQDASDAVLYKTQDGNFRIEVKTLSFDTAGRTHTFLVPCDYTSKCDPIVRGIVDIEDPNNSAGDSISYKRYDPIFEGTNVDRVDNLDKVFTFDVCGKGPRRANIRFRMEDYDPIRNDKIDNFNHFIIFDQNKPAATEAEAQWSAPITLLGHDKSLHKLTMQYRMYFIPSGECKTRATSFWGAIVGKKKRDIEEDDTMGMFE	1.01	1.6
	A7, 8	61	EZ762723	contig25109:1:2811:1|similar to Probable 2-oxoglutarate dehydrogenase E1 component DHKTD1, mitochondrial (Q4KLP0)|Evalue: 0.0	431	105304	10	16.6	936	6.18	ACQTSLFISCEPSDCASLLSPRWRRSFFSRIPSKDQQLRSHQTWAALDYDNRAQSDEQNVPLYSTDASHRISCRASRIVRAFREHGHKVANIDPLQLWKPMPNAPELNPALHGFADMHESVDMKGLLGMQRVTVGELVSVLSDTYCSTISAEFEHIPEWKNESGSRSASSDIVXSEISNDVRKSVAKLLLETQCVDQFLQNKFPTLKRYGGEGAEGNLIFLDEVLALAASDNMKEAIVCMPHRGRMNVLAVNLMF	0.32	0.35
	A12	81	EZ761787	contig20806:52:1386:1|similar to Tubulin beta-1 chain (O17449)|Evalue: 0.0	431	50029	16 (8)	18.9	444	5.01	MREIVHLQTGQCGNQIGTKFWEVISDEHGIDQSGNYVGNSDLQLERISVYYNEAAKRKYVPRAILADLEPGTMDSVRAGPFGMLFRPDNFIYGQSGAGNNWAKGHYTEGAELVDSIMDVVRKEAESCDSLQGFQITHSLGGGTGAGMGTLLISKIREEYPDRMMCTFSVVPSPKVSDTVVEPYNATLSVHQLVENSDETFCIDNEALYDICFRTLKLSNPSYGDLNHLVSAVMSGVTTCLRFPGQLNSDLRKLAVNMVPFPRLHFFMVGFAPLTARGTQQYRATTVQELAQQMFDSKNMMAASNPRLGRYLTVAAVFRGKVSMKEVDEQMLLAQNKNSSYFVEWIPNNVKTAVCDVAPRGLKMSVTFVGNSTSIQELFKRISDQFTAMFRRKAFLHWYT…	1.02
	A16, 15	51	EZ762550	contig24441:1:655:2|similar to Hydroxyacylglutathione hydrolase, mitochondrial (Q6P963)|Evalue: 1e-68	430	25041	15 (7)	37.8	217	6.06	DPVEPQNIKKCIDQEKDLQITAVLTTHHHWDHAGGNNDFVKLYPSVKVYGGDDRIDALTNTVKDGDEFYIGKLNVRCMFTPCHTKGHICYFLTGEGNEDPAVFTGDTLFIAGCGKFFEGTPEQMFDNFANKLGKLPHNTRVYCGHEYTVQNLKFAHSVDNSDDHVKTKMKWAQSCRDSKQATVPSTIEEEKLFNPFMKVQSAEEMGERRKQKDNFKA	2.08	2.21
	A13, 4-15	64	EZ759721	contig04424:252:1300:3|similar to Aquaporin-10 (Q96PS8)|Evalue: 4e-56	430	37958	7 (6)	26.9	349	7.68	MADAPTYIRQSTTGTATTAPTTMPVHPDTTYYKTTTTTVSDAPRAIADVNDDNHDNYDETTGLRSGEKKTRPLVTSTTAPIDAGRMTLGQKISRWTRIGSDLAREALAEFLGSFILIVFGNGVVAQVVLSRGAHGNFLSINIGYGLAVAFGVYIAGGISGGHLNPAVSLAFAALGKLPWRKLPVYMFAQYAGCICASAIVHAIYYDALNNYDGGNRTRGDTWQSTAGIHASYPQEFLYWQTGLADQIFATSFLMIGILALTDNRNTGPPGGVVPILVGCLVMAIGLAYGFNCGYPINPARDMGPRLFTLMAGWGSRTFSNYNPYIFNDYYQRIPYWFWIPVVGPHLGAL	0.8	4.67
	A12, 11, 16	82	EZ763170	contig27355:1:743:3|similar to Probable protein disulfide-isomerase A6 (Q11067)|Evalue: 2e-57	429	27123	10 (7)	39.8	246	5.38	WSLQKLAPEWAKAASGLKGKIKLGAYDADSQKTYGQKYGIKGFPTIKFFAAGKKSSSSISDYDGPREADGIIAWGSDKAAESAPAPELIQLTSGQALKDACDDHVCVISILPHLLDCQSQCRRAYLETLKKLGEKFKKQHWTWLWTDAGTYTDLEESLGLGGFGYPAMATVNAKKGRYSVFKGGFSYDGINEFLRSLAANRGTTEPLKNNALPSVGETEKWDGKDAVMPVEEDIDLDDIDLSKEEL	1.53	1.91
	A9, 4, 5, 7, 10, 12, 17	78	EZ762473	contig24228:1:2557:2|No Annotation	428	93563	10 (6)	11.9	851	6.23	DGSSTAPMLSLFEIVQSCSATGKPHSCTQRHSDTLPFECPATRRESRDYRRKSLTNGFYYTQLPATTAAQTAAQLNAAPLQSLEAAMPGTQAFAAGDPRIVRPIQVTVHREDRLWSGTADDAMDAESLRRINDHVNNAMQRTAENDTALYTCANCRAQLVQAKNLNGRFGTLYTQLSYVPIGLSENGTAYPSVNTIQNIENNVTQSLLNEPYAMRPVALYAPILYSQNLQAAPIYHRDFAGPLGINDLRAIIGGPQLQTMVSDWLKFNEACRNAAVCVYDVEIVGTQRRISIIDKSLITRVFYRIRTSYPYAVYPTMDQFTDASDLAGIPLQKVVVSPTVRDADIAQRLSALYGQPVVRTKRQVVGPRVITATGSNVTVIARDGDRIVNSAGEAVTVIP…	0.36	0.77
	A16, 16-19	52	EZ761199	contig17994:1:644:2|similar to Electron transfer flavoprotein subunit beta (P38117)|Evalue: 8e-67	428	23586	11 (9)	59.8	214	5.84	TGIETVLLNFASDLCSSGFCGSVVRCICLCVFLLQIPVRMSLRVMVGVKRVVDYAVKVRVKSDKTGVATEGVKHSMNPFDEIAVEEAVRLREKKAVGEIIAVSCGPTQSQETLRTALAMGADRAIHIEVEPSDFQNVTPLHVSKMFARLAKDEKIDLVILGKQAIDDDCNQTGQMTAALLNWPQAIFASKVEAADGHLRVDREVDGGSETVRAS	2.78	3.92
	A4, 3-6	25	EZ759200	contig01644:1:968:1|similar to Vacuolar protein sorting-associated protein 13C (Q8BX70)|Evalue: 2e-09	428	36103	9 (7)	33.2	322	4.71	VDPETATIDELREKSYERYLLQLKNFQIKFIEGQRAIQASSGHQILEPINWDFSVANCLVRDHPQLPWGRIVGTLPSINVNIADDQLMQVLRLVLTIPLPQSXPTSELEFSREAQQILREYRDTQSMISALTVKEAQEIVTEGEEPQVPVFLEVSLILQEINLSILSKKSPTTPLLRLGITALQQVIAMENFKLQSKTSVGDIFMEFCEGEGRPVVDLVKGRKLGQNDDRSDARVLTIVYRSVDPGHPFLATKYANVLSRIEAEFSGLDVTVDQKAIYTLAQFGEDVQSEVNAVLKEMRSQNQKSLPDLATDEADTTTDGSG	0.85	1.88
	A17, 16-19	41	EZ761993	contig22232:1:250:2|No Annotation	427	9090	18 (6)	79.5	83	5.11	ISDAARINTEKRIMSVDLTDINSAPGMFDAAKTLIEFLYFTRGTFDTAHIQGLTALTTLRLKDGTATIRAADLDTLTKLDSIF	17.56	33.65
	A13, 11-16	66	EZ759251	contig01971:138:399:3|AGAP000941-PA [Anopheles gambiae str (XP_560153.3)|Evalue: 8e-05	425	9637	17 (7)	58.6	87	5.8	MARHSSEITIPILKRETSVIDTEFGSVGGRFDDEMRKMDSEMDRLRGDIVEGNRKLESSFSRTVTTTTRTTSTKGGTTSSSSSQEFS	20.65	30.05
	A12	84	EZ759565	contig03543:125:1543:2|similar to NADH dehydrogenase [ubiquinone] iron-sulfur protein 2, mitochondrial (Q91WD5)|Evalue: 0.0	424	54837	13 (9)	22	472	6.95	MSFLSSQTRGVQRLCNASLKQLNIVRHITLTPNRSGATWNPSEKYLEQFRGVVLVPMNPRYWEQKPDTPMRWTQSDPYSPPVEKKVRNMMLNFGPQHPAAHGVLRLVLELDGETVVRADPHIGLLHRATEKLIEYKTYMQALPYFDRLDYVSMMCNEHCFAMAIEKLLNIDVPIRAKWIRVLFLEITRLLNHIMGITTHALDVGAMTPFFWMFEEREKLCEFYERVSGARMHANYIRPGGVQYDMPLGLMDDIYEWASKFNQRIDEMEDVLTNNRIWKQRLMGVGVISAEDALIWGMSGVMLRGSGIKWDLRKTMPYEVYDQVEFDIPIGTNGDCYDRYLCRVDEMRQSLRIMLQCLNKMPPGEVKIDDHKIVPPTRREMKTSMEALIHHFKLYSEGVQ…	0.79
	A15, 15-20	47	EZ762044	contig22522:136:803:1|similar to Prohibitin-2 (Q5XIH7)|Evalue: 1e-84	423	24672	18 (8)	41	222	9.52	MDKAKISDMLGRMGKAPRGVGTGLKLLAAAGGLAYGVSQSVYTVEGGHRSIIFSRLGGIQPDVYAEGLHFRIPWLHYPIIYDIRSKPHQVSSPTGSKDLQMVNISLRVLARPDAAALPRIYRSLGLNYDERVLPSICNEVLKSIVAKFNASQLITQRSQVSLLIRKELTERAKDFNIILDDVSITELSFGKEYTAAIESKQVAQQEAQRAMFLVEMAKQERQ	3.05	8.88
	A8	72	EZ759158	contig01428:1:1633:2|similar to Cysteinyl-tRNA synthetase, cytoplasmic (Q9ER72)|Evalue: 3e-164	423	62297	8 (7)	19.1	544	5.61	AKHPKEKILQDLEEALQTYSDKVSRDSDQLKRAALEEIVKKCRSHLDQFKGLNGVSDTVLENEMVXXAFGEPLGDFLDKRLGSTVTDNSVFTSLARHWEQEFDKDMAALNILPADVLTRVSEYVPEIVDFIQKIIDNGFAYESDGSVYFDTVKFDQSREHHYCKLVPEAFGDLEALTEGEGVLSGEKASEKRQPTDFALWKASKPGEPHGTHAWGRGRPGWHIECSAMATCVLGEKVDIHAGGVDLRFPHHDNEIAQSEAYFGKDSWVNYFLHSGHLTIAGCKMSKSLKNFITIQDALKSYSARQLRLAFLLHSWKDTLDYSPNVMDLAXFYERMLNEFFLNTKDMLRNSTSEHVKWTSDDLSLQEKYHNMVRGVHEAMCDSVDTRTVLDVIRDLISHT…	0.51
	A9, 8	81	EZ762415	contig23999:1:1855:1|similar to 1,4-alpha-glucan-branching enzyme (Q8NKE1)|Evalue: 0.0	423	71426	9 (8)	16.8	618	5.63	AANAMPEVSVSVSKGAVKRVRGDPRIANMAESRWIDNPDEIDVPEINTLLELDPYLRLHEREIKRRYGCFDAVLQDINQYEGGIDKFSRSYDRFGLNVGEDGTVMVCEWAPAAEAIFLTGDFNNWNRTECPLKKGDFGRWEARLPPNGDGQCAIPHNSVVKLCIITKNGQFVERISPWIRYATRSKQPGNFIYDGIFWNPPKSEKYTFVHSRPKLPKDLRIYECHVGISSSEPTIASYTHFTDNVLPRIKTQGYNTIQLMAIMEHAYYASFGYQVTNFFAVSSRYGTPEEFKRLVDTAHSLGITVLLDIVHSHASKNVLDGINQFDGTNTCFFHDGPKGEHSLWDSRLFDFSKWEVLRFLLSDLRWFVEEYQIDGFRFDGVTSMLYHSHGIGHGFSGDY…	0.5	0.7
	A4, 4-13, 15-18	26	EZ762099	contig22765:1:560:3|similar to CD109 antigen (Q6YHK3)|Evalue: 3e-16	422	21059	12 (8)	40	185	4.47	NNENAIVLQSAESPAFANSIMIEATGKGTALAQVTWSYNVANTTAEQSFELDVIINDNPSDYTMHVCARYKKNGVSDMVVFELETLSGFQVDEDEVHKLVLADTTPTIKRVDVENDNTKLNIYVDEIGQRPLCFDVRAYRLFKVDDLQTRTVVVYDYYNPQDRKTETYSLESSNQVSRIPENNNL	2.78	17.92
	A13, 11-13	67	EZ759472	contig03067:284:1441:2|similar to PDZ and LIM domain protein 1 (O00151)|Evalue: 3e-32	422	41630	8 (6)	31.2	385	8.84	MAHHPQGAFKLTVRMQRDSPNIPWGFRMQGGSDFPNLPLSIQRVNPGSLSEEVGLQPGDIITAVGDPPNPVIEWSHAEAERVMRQCGDYLVLTIQRGGGRIWEVGRSAAAAEPQPDFSMASRNLAASRISNQLPTESKQFQPSGAGYNTGYNPSHIPVQHSLAAGQSQPYNPAGTSHNRAAKPFTASNATTPAYSNSTGLQMSAYNTPVGLYSQDNVQHAYNANASMLTGNTASSGGAPQSSYGNSNYGSSQNTYSSQQNTQSTQNQYGGYSQPNGGSQYGSQTTNSQTGFTRSVAAPQTMSADHYQQPTSQVPKCSSCQKGIVGVFVRVRGQPMCVSCYKCAKCGVLLKTIGHFIVDDQLYCETHAKMLTRPGYGGWQSSTTMS	0.71	1.63
	A19, 17-20	34	EZ762674	contig24936:91:732:1|similar to Ras-related protein Rab-11A (Q5ZJN2)|Evalue: 5e-100	421	24074	11 (8)	55.4	213	6.12	MSGKDDEYDYLFKVVLIGDSGVGKSNLLSRFTRNEFNLESKSTIGVEFATRSIQVDSKTIKAQIWDTAGQERYRAITSAYYRGAVGALLVYDIAKHITYENVERWLKELRDHADQNIVIMLVGNKSDLRHLRAVPTEEAKAFAEKNNLSFIETSALDSTNVETAFQSILTEIYKIVSAKEIRDSPDREPRFGGTGQAIHVQPTDQNSSQKKCC	2.22	4.88
	A15, 14	49	EZ762188	contig23157:49:1047:1|similar to Protein NipSnap (Q9VXK0)|Evalue: 5e-68	421	38414	12 (8)	33.1	332	9.18	MALRSMHSEAVYFGKKALDGRLPLLVRGFNNSSLSFAGSNLPPRDSPPFESVDGRSQRPPPNQPFQQTQQPIDARSGPRTIEVPERGGDGWFSRLFYKRVETGTESHSRKLNIKGVIYEMSTHNVKPDAHDYYLDLYEEYASTLQADNEKYPVKLIGSWMVETGEDQDQAIHIWRYNEGYSSFDKVTENLKKDKAVRKMSTDMGKTLRSRNNQTMLSFSFWGEPQPREEQSVYELRSYVLKPGTLIEWGNHWARAIRIRKKNEDGVGGFFSQIGHLYVVHHLWAYKNLQSRQEARDRAWTTPGWDDCVANTVPLIREMQSRILFPTRFSPLK	1.1	1.19
	A10, 4-20, 24	85	EZ760515	contig10105:1:309:3|No Annotation	421	11691	16 (5)	63.7	102	5.63	NDIWCSEERFQVLCHQKGSAQIRIQSQAPEVFPTLTLNAQLSPRRISANLDVQQVPQFLRDIIPTKTYEASADVSGDKIIVQFTLPQGLYTSQRGHVSWENE	9.25	49.63
	A9, 8-11, 13-16	82	EZ762856	contig25690:1:1517:3|similar to Nucleolar protein 58 (Q6DFW4)|Evalue: 6e-146	421	56730	8 (6)	16.2	505	7.78	AKEFTVEFXEEFVGKTQKMLVLFETSTGYAVFKLLDEKKLAKVDDLYNDFQTFEKASNVVQLKKFYKFDTTEDAMAAASSAIEGRLGKKLKKVMKKLVAEDAHEELAVADALLGKTIKDKYSINCVANTAIQELMRCIRSQSANLLTDVTQQESTAMQLGLAHGLSRFKLKLNAEKVDTMIIQAVSLLDDLDKEVNNYIMRCREWYGWHFPELGKIVQDHTAFVKVVKRIGDRVTAEHSDLSDILSADIETRVKEAAQISMGTEIAEEDIEHISNLCEQVIEMQVYREQLYNYLRNRMTAIAPNLTVLLGELVGARLISHAGSLMNLAKHPASTVQILGAEKALFRALKKKHDTPKYGLIYHAQLVGHSNPKIKGKMSRMVAAKAALSVRVDALAESPD…	0.48	1.42
	A13, 12-15	68	EZ761221	contig18095:1:491:3|similar to Aspartate aminotransferase, mitochondrial (P08907)|Evalue: 6e-64	421	18140	9 (6)	52.1	163	8.58	FGDQSQVIREGLNVTVQAISGTGALRLGAQFLEKFVKGSKDVYLPTPSWGNHTPIFKHAGMQVKQYRYYDPKTCGFDHVGALQDLTKIPQNSIVLLHACAHNPTGVDPKPEHWAEISKIAKNRNLLLFFDMAYQGFASGDINRDAAAVRTFVDDGHRILLAQS	2.31	3.36
	A8	74	EZ759355	contig02433:240:1799:3|similar to Ectonucleoside triphosphate diphosphohydrolase 3 (O75355)|Evalue: 2e-59	420	59075	11 (7)	18.1	519	6.04	MRALYLLQXRQPRESNSSLVSDSLISSDDTSNEFPVNVTKDQETTNTTEAPKIKEIAAETDFLELSLDDLDGDIEXVKTAYIVVIDGGSSHTDLFVYSWPGQKVNHTGLVTQIGKMDCNGTLSSHKNSPSDAGLFLKGCLDFAKNTIPQKTWPNTPLLLGSTAGMRVLRDQNKTVAGIIMESVLMYVRNNYPFIVKKEQFRILGPDEEGGFGWVSINFARDIFRQNAKFSADERSQTTGFLDLGGASTQISVEVTHNPHLAPSFVMKLFDHIYAIYTKSFLCYGKNEAYRRYKAMMINQQRMADSIDDPCRPKGYKLNMEYTFAFENLCSNHSLLHTERKERYGIHGTGNSGLCYKNVSRLFKETLDQNPSECPFQDTECAFKMQSPIAGKFMAASAFY…	0.54
	A11, 12, 16	88	EZ761316	contig18586:44:1159:2|similar to Troponin T (Q9XZ71)|Evalue: 1e-23	419	44302	10 (9)	24.3	371	5.39	MSDEEDNWMNNEDEDEDKGQKSHKKDEPKEEKTEAQKMIEEKQRKHEAEENEKINALEEQRRLQREKEDAELEKLKQKQAQRKKEREEEEKRMEEQKKVFEEQKRIEAEQMKAKQEEDRRRKQEEAERKKAVAQAAMSGGRNFVIQKSETEEGGGSTLDKFMNISKAQTEMGLNAHELDALKKRTVNDRVKPLSIGDLDKNGLKAKAEELWKLIINIETGKYDLTMRQERQDYDLKELNERQRQINKNKYVKMGLDPDANSRFPPKVQLFSKYDRRTDRRTYGDRKGLFDRTKEEEKKELARPKAVKRDTWIKDKVEESRRHYDEEPEDTETNDHYSSNNTYGNHEEDDAPRRQSTTYSRHEEEEVEAEDE	1.05	1.66
	A8, 7-11	76	EZ762857	contig25692:1:1571:3|seems to belong to immunoglobulin superfamily. DCC family|Best-hit: Netrin receptor DCC (P70211)|Evalue: 2e-08	419	59222	15 (6)	25.1	522	8.75	PSSAPSNVRIVPSDTDPTSAVIHLPRSGEHVDSYLILYAPSGTTGSRERVWLEMTVQGDQTQASLRNLVPNMEYFYTVQARNRRGYGPFSDTASFTTSGGGSAWRPQPEPYYPSQPYNPNPYTRPPTNYWTTADPYRRDPYNQPNYDPYRTTHRGMIAVNSSRRQRSPGINRHNIPITRRLDRIGIAVTVKIRLSXPNGEDSVSDMAPAAPKDLFVMQADAPTEAIVSFTPPEATNGEILSYELKYTHDSSTPDSQWTVEDSPDAQISVTFLHPNQQYHFKIRARNAHGFGPYSEVFKYSTDPNVQNVDPGSGSATVGFIPAGDNNDDNNHSPTDASTDDDNRDDHGDSDASQXKEMKLLINGELRFNGQXQLTTGHPEYSLYTASDTLPSKLPLLDST…	0.72	1.53
	A13	70	EZ759471	contig03064:1:1299:1|similar to Serpin B8 (P50452)|Evalue: 2e-53	418	49035	14 (8)	24.5	432	5.84	ISHLYSASDNLNIPISXXKDVRRFLDSLNYXLLCKSIAWESLDFAEMSQSASLTKPLVNFSVSLYKELAKQAEDENIIASPLSIYSCVLLAYSGAEGSTKADIEKALSLHKDFPQKSDILSAFGGLMQLLNSQQKEEYPNYELAIANSLYVEKSLSLKAEYVKNAEQHFHAKPSTEDFKDDSDGARQRINSWVEHLTRQKIKNLLQPGVVTPDTSLILVNAIYFKSNWDWKFQAYATEEREFRGYGKRSQVQMMQKEREFPYFSDQKNRFQYVEIPYQNHELSMCVVLPDDDQGLKQLESSLAHETLIQAFSGAKEAKVQLSLPRFKSTKDYDLESAFKSLGMSDLFSDPDFSGISDSKVKVSKAIHKAFIEVTEEGTEAAAATAMSIATCSAMVSSVR…	1.05
	A13	71	EZ760322	contig08449:115:1263:1|similar to Proteasomal ubiquitin receptor ADRM1 (Q98SH3)|Evalue: 4e-39	417	40924	9	35.3	382	5.82	MALFGRQAQQRSNSRYLLEFKAGKMILEGKTVKADTRKGLLYISKGEDDLFHLCWRERSSATPEEDLIIFPNEVEYKKVPQCKTGRVFLLKFKGSGRKIFFWMQENETSKDEELMKKLNDYLAGRTPSRSAAGGQHTELQVPADLQAMGIDDAALQEMLGGIDRNQLLQMLGLGSGGGSSSGGGGSGGMGLLNSLRAAPRPDTASSSSAAATTPKTTQAPKPSAPTKASTGASTSAAKIQLSDLQNLLGSVAPPAEQTSVDLSAALTHSLLVPLLSNQQFAERLLPHLPQHPLVPHTAEEVVSTVQSPQFHQAVQAFESAFRTGQLGHLIQEFGLGPDAVAAANNGDFEAFVEALEKNASTTPKGSDTSKKPNNDDDEMSVD	1.01
	A12	86	EZ759983	contig06040:2099:3274:1|similar to DnaJ homolog subfamily A member 2 (O60884)|Evalue: 3e-86	417	43673	9	33.5	391	6.18	KAYRKLAKQFHPDKNPEEGEKFKEISFAHEILTDPQKRSLYDRGGLDSLKEGGMGHDMEDILGSMFGGGGGGLFSSFFGGGMGGRRRQRGEDTVFPMNVTLEDLYKGKTAKISIEKTIICPSCNGTGGKSGKLANRCSTCRGTGVKVSLRPLGPGMMQQIQEECGKCRGTGQEFSDSDRCNKCDGKQVVRDKKVVDVHIDKGRRSTDRIILRGEGDQKPGIESGDVIVLLQQLKHEVFEREGEHLFMTMTIDLVDALCGFQRTITHLDGRTLLIKRGPGEVTEPKIYTVVGEGMPVYRNPMVKGNLMIKFTVDFPSDSWKPNSDVLKHLEELLGPRPTPPKIANTEEVEEVSLHSLQGHHSEGREGSSRGEAYDEDDEESEGPGNVRCQSQ	0.93
	A9, 9-11	83	EZ760242	contig07876:93:2093:3|similar to Carnitine O-palmitoyltransferase 2, mitochondrial (Q6P4X5)|Evalue: 0.0	417	75194	10 (8)	15.5	666	8.85	MIRSANVLMAEVRSSAVTSGSAIITAASHRHSSTQPQSQSVDGEAYQLLQRSTVPTMHFQKSLPRLPIPKLDKSCERYLTAQQPILTTQQWASTAQFVKQFQEKEGKELQSQLISVDKGKKYTSYISDLWFDTYLRSRVPLPLNYNPFIGINDDTDKSKMDQAVRATNMVFSILRFKNSLSRNLLEPDVYHMNAKKSDTQSFRKFVGMLPAAISWYGAYLYKAFPLDMSQYNRLFNSSRIPRKEKDVLFTDTNARHIVVLRDGQFYAFDVYDKSGALLPAADVLSSIQYIIKSQRSSTDTSIAVLSADDRNHWASVREKLVNEGNEPLLKMIDSAAFLLCLDSEAVTDVHQYCLEMLHGNGFNRWFDKSFSLIVDANGRAAINFEHSWGDGVAVLRVVN…	0.53	0.76
	A11	89	EZ762606	contig24650:1:1523:3|similar to TOM1-like protein 2 (Q68FJ8)|Evalue: 2e-81	417	56181	10 (9)	26.5	506	5.06	ICXKLILCSFEEAITVVKMEISGVKDKVVDLFAGNPFATEVGHRIEQATDPKLGGENWALNLEICDLINESEESAKDAARALKKRLTNAISAKDFPAAQLTLTVLETCVKNCGRRFLVLICSKEYVHDLVKLIGPKFEPPVVLQEQLLGLIQSWAETFRNSSDLHGVSEVYDELKTKGVEFPVLDLENMAPIITPQRNPSAAPPTPRQAPAISGSQVSLQSGSHQSPSHTQPQSQYTLSSAVNLSAEQLAKLRSEVDVVKSNLQVFSDMLGELKPGQESPDDLQLLIDLNKTIRAMQDRIVQLLSTVTNEEVTNELLAVNDEMNNLFLRYERYERQRKGVQTTVQNRALPPIPTQPIEGSSTSTLIDLSEAQQSSQSVNNVTHQMRGMNMTDTPRETSD…	0.77
	A7, 6-9	64	EZ760781	contig12885:1:1387:2|similar to Eukaryotic translation initiation factor 3 subunit C (Q6P1V4)|Evalue: 4e-127	415	53849	8	25.3	462	8.92	LGEIVSQRGKKSVDRQEVIELIEELGVVARRSNLGAPIDIKLKLSLLSAXFDYNPNAASHMKTEMWKKLLDTLSELLDMLMAHPEIXCGTTCARRRREFADTSKRLRIHGYPLILIERMDEEFTKILQNCDAHSPEYVELLKSELKVCQIIERTQQYWXEKGADEDDLCRIYERVIAHLYYKVDKQALFVSGKDSRDAPSLIIMDRLCSYIFNNAGAQSTNERSEAGRVKLRAILCRVYHLALHDHWYEARDLMLMSKAQDNIAVADPPSQILYNRTMVQLGISAFRAGMINEAHNALMDIQSSGRPKELLAQGLLPLRQHHESRSVEQEKIEKRRQVPFHMHINLDVLECVYLVSAMFIEVPYLAAXMNGQRRRIISKYFYHSLKQSERHALSGPPET…	0.61	0.92
	A8, 9	78	EZ759159	contig01429:234:1822:3|similar to Eukaryotic translation initiation factor 3 subunit B (Q8JZQ9)|Evalue: 6e-122	415	61127	11 (8)	17.6	529	6.59	MDSESGSTKGFAFYEFQNAEIVQNAIRQLNGHAIDKQHRLIVDSFTDYEKYANVPDEWEEPNPRPFKDVGNLRYWLENEECYDHFLIMCSNSGEHVESAAVYENTPVEPTLIESRHHWTENFAIWSPLGTYLATFHQKGVALWGGSEFKQLIRFSHTNVIRASFSPKERYILTMRNKPEYIPIDDQSMILWDIITGAKKRVFVWDAKDPLPPAATLRWSYDEQFYAVMGKESINVHETETFALLDRKPIKMPFLQDFTWSPAQNYIAYWVAETVDVPARIGLLEIPQPKDGRELRSKQIFGVLGCQFVWQKNGEYLCAKVDRYKHKSKSKDNVIQYSGLSHNLEIFTLTSKKEIPVESLEIKDSIIDLAWEPNGNKLVLLSSSEGVTYASFFSGRLGKQ…	0.6	0.77
	A16, 15	55	EZ762079	contig22702:1:727:3|similar to 26S proteasome non-ATPase regulatory subunit 8 (Q5RE15)|Evalue: 2e-48	415	27735	13 (8)	37.8	241	5.41	PISGEKCEALLNQIKVALTDFHFVPTSEGEVSKQELILARDVLEMGAQLAILKRDLKSFQRHIDQLRIYYYDWKDLIPDSSLRTQLLGLYLLSLLAENRLGDFHSELELMSLDTVEKDVYLKHPVHLERCLMEGSYSKIFLAQNNVPAPSFAFFMEILVNTTRAEIARSITRACPEVNLNSLCRMLFLKDQRELEAFAKPYGWTIGKNGLFHFNTERNLNSSEVGSAMDTDHVQQTGDVLL	1.78	1.9
	A9, 10	85	EZ761913	contig21658:1:534:1|similar to Cytosolic purine 5~-nucleotidase (Q5RA22)|Evalue: 6e-23	415	19838	8 (7)	66.7	177	4.85	SVIHEMDMSYGLLGSLFRSGSFQTFFAGQVGRYADLYAPTFLNLLYYPLHYMFRAPAMLMPHESTVAHEDVLPQTRVRSGSVLLHDRSKSICYDNTLQMKGALERQSTVDTDVPVTAAQTQTRRQPVPETPATLTQTLDLFDDDDETVKSPTMRSARESMDNMNSSGNGNEDLDSSQ	1.99	2.16
	A12	87	EZ759830	contig05102:1:1215:1|similar to Sulfite oxidase (Q9S850)|Evalue: 2e-81	414	45508	8	27.7	404	6.1	QKMAEEGKQSTGLLTKVTEALHNLTIPKGYSEEPSDRSNQLKVNQQYPFNAETAPESLSQEFYTPTQLFYVRNHGPVPQIPSADDHIFEVSGAVDQPKSFTLKQLKESFENVSMSATLMCAGNRRNELNAIKKVKGVGWDVGAIGNGQWTGVRLRDVLQSVGTELDNAQLHVEFLSDDVDSEGYAYGSSIPMSKVGDPKGDVLLVWAMNGLPLTRDHGFPLRVVVPGFIGARSVKWLRKVTVLQHESENHYQKKDYKIFLPDVDWDTVGELWDKTPAALQLSIQSAITDPVDNQTVAKNTAYIIKGYALSNGKRVWRVDVSVDEGKSWKMADLVHKDEVTVKGTDDRYWSWVLWSLSVDKMPSPCVVMCRAWDISMNTQPEKPESIWNLRGVLNNAWHR…	0.75
	A14, 14-18	60	EZ759271	contig02052:156:636:3|similar to Malate dehydrogenase, cytoplasmic (P40925)|Evalue: 5e-56	413	17605	14 (6)	55.6	160	8.52	MSKDAGEPIRVVITGAAGQIAYSLMPILCKGEVFGKREIILHLLDIEPMMGVLNGVVMELQDCAFPLLRDVVPTADPAVAFKDVSYAFLLGAMPRKEGMERKDLLKANVRIFKDQGSALNQYAKKDVKILVVGNPANTNAYILSHYAPSLPKENITAMTR	5.86	7.39
	A16	58	EZ761698	contig20273:1:768:1|similar to Tetratricopeptide repeat protein 35-B (Q8AVU9)|Evalue: 1e-66	412	30118	10 (7)	39.5	256	6.37	RHASRLRKIREDHVRRSTEVIDLWSEDLESHVSKLGDEVWVIYEQVCIAALDCGLMDVAGNCIAKLNIKFPNSNRVCRLGAMGLEAVGKFDEARQVYEKLISLDETDTLSRKRLIAISKSQKRYTDAIFELNEYLKSFQNDHEAWLELAELYCHEQDYAKAAFCMEDVLIHHPHNHLIHQRYAEIRFAMGGIENIENARSHFAHSIKLCRSNTDSAYGFFVCSSYLATTQKSTALKRKENQRYAEWIIDQLKENHS	1.08
	A18, 17-19	33	EZ762279	contig23482:88:621:1|similar to Transcription factor BTF3 homolog (Q18885)|Evalue: 6e-25	412	19239	9 (8)	40.7	177	9.35	MAEQVKNSAESSDTKMATQPNKDRVQQLQKLQDQVRTGGKGTPRRKKKVVHHNTLVKDDKQLQNTLKKLGANPIPGIEEVNLFRNDGTVINIKNPKVQTALACNTFSVAGNAVEKPVTEMFPSILNQMGPEGFIHLRNLNNILNTARTKGGAAVDKAGAGAADDDVPVPSENFDAKE	2.64	3.4
	A12, 18, 19	89	EZ762740	contig25188:72:1790:3|similar to Matrix metalloproteinase-16 (P51512)|Evalue: 5e-54	411	64356	8	17.5	572	8.46	MCERSSLLRIFSIIFLFTALCPQYGAASADPGLGDAIREVYQGAKDFGRRIYHAFKAKATNFLQKFGYMRSSNPESEYTPSEDTFKDSIKTFQRFYKLEQTGEIDESTKNMMETPRCAVPDNIPPEYDGSNLQHHRQKRYVVLSGYKWKRRDLKWRINKYTQKLDRSIVDGAFTKAFQAWSEVTPFEITYKADGPVHLDIQFKPQDGPGGTLAYAHPPGPGAGGDMRFDELEQWTVRTAEGTNLYQVAIHEIGHTLGLDHSDNRASVMFPAYTGYVRGIKLAPDDVAGIQTIYGSKTAPKTQAEVDASSGRSTSVKLGRTSGGGSVFGGSTGGKIAGGLIGILGKLFNPFGAARRQQMAMIYGGDACSSSNTHMLDGITITQDGSTYAFKGQHYFQLKD…	0.49	0.94
	A8	79	EZ760006	contig06158:1:2033:3|similar to Vesicle-fusing ATPase 2 (P54351)|Evalue: 0.0	411	75017	8	17.6	676	7.28	KWATISIGQPLTVRPYKMDTTQILGSIAFEVDFYLKTKTTSEAYDTEKMALEVNRQFPRLALTKGQSLIFAFSNKPHLKLTVKDFSVVDLSSVGADTKAKQNEPKDGVGVTTPNTETTFSKAEGTTIMLTGKAMGKLQRTNLLAPDFDFAKMGIGGLDNEFSVIFRRAFASRVVPPEVIEQLQAKHVRGMLLYGPPGTGKTLIARQIGKMLNAREPQIVSGPSILDKYVGESEANIRKLFAPAEEEEKRLGMHSGLHIIIFDEIDAICKQRGTGAGSTGVHDTIVNQLLAKMDGVDQLNNIFVIGMTNRRDMIDEALLRPGRMEVQVEISLPDEKGRVQIFNIHTALMRKSNMLSADVEVQELASMAKNFSGAEIEGLVRAAQSRAFTRLVGTGGKATI…	0.41
	A8, 4, 5, 9	80	EZ763327	contig28287:1:472:2|No Annotation	411	17748	13 (7)	44.2	156	4.99	NITEDRSSIELRQSFVDMYTDAMFSYPAIKQHVYYANNSLAKSGAQMYLISYDPGFRELGAFHFSDAIALFRGLLDSLMPNSTMEGITKPMRDFVQEIAYNGTANIGLSRSNGDNKEGIEKHDYLHLDKDGKWYNEIATASDMKIVEFWDKIFGVN	4.7	9.78
	A11, 10-12, 16, 17	91	EZ761515	contig19386:1:890:1|similar to Probable serine carboxypeptidase CPVL (Q9H3G5)|Evalue: 2e-74	411	34056	14 (6)	37.2	296	4.77	SSMFALFCEHGPFEIRASMKLTLREYRWTRLANMLYIDNPVGTGFSFTGSLDGYSRNEEQVGKNLYQALLQIYTMFPQYQNGEFYVTGESYGGKYVPAISLRIHQENPKASLKIPLKGLAIGNGLVDPANMMHYGDMLYQMGMLDEGERDVFHASEDAYRKAVSEERWRDAFFIFDDLLNGDKIPYPSFFYNATHSKYYFNMLYTEGPKSFDYYVQYLQECFVKEAIHTGNQEFSNGSVVEDFMLEDVAKSAAPMLATLLDNDYEVMIYNGALDIICGLPLTEAYLQVLQWKGLAE	1.31	2.03
	A14, 15	61	EZ759727	contig04448:197:1144:2|similar to Aldo-keto reductase family 1 member C23-like protein (Q6W8P9)|Evalue: 1e-56	410	36079	8	30.2	315	6.52	MPYIQLGCWQGTTEWDKQQMKNVIKEAIDLGYRGFDTAFAYNNEAEIGAALNEKIKDGTVKREDIYIVTKVPPHHLSPEMIPVAFKKSSDKLNLGYIDLYLLHMPISVKHPGDDDEWFERDASGKILTQQVDHVAVWREMEKLVESGKVKSIGLSNFNKRQIQNILDHCKIKPANLQIELHVYLQQKHLVEFCQKNGIVVSAYGILGSFGALGAPKKNGVPLTPVLELPIVKKMAQKYNKTPAQFLLAWILQRDVVVLPKSSNKDRLRENLDVFDLKLSAEELKELETLDAGVRLYSDLLRGMEHSTDYPWNELY	1.02	1.32
	A16, 15	59	EZ762839	contig25600:215:1093:2|similar to Eukaryotic translation initiation factor 3 subunit F (O00303)|Evalue: 7e-60	410	32869	11 (8)	31.2	292	4.98	MAARNAVASMSSAPSVVRLHPVVLAGIVDAHERRNQKATRVLGTLMGRLDSGTVEVTNCFSVPHEESQGLQPSQVALDFKFAQVIVDLNKRTNSLEEVVGWFSTRPQIGDTSFYIHQYYMRISNNIIHLTVDCTLENDRMAIKAYVWAPVGVPPSDLSNEPQQSMFAQIPVEIYCWEPERVGLDLIQRARKDPTRIVNIPTDAEQVLQTAEQIDDMLQSVLTYIDDVVNDRVVADPEIGRALMDLVGTIPKIDEEAFEKMVNASRKDVLMVRYLSELAKAQLALQEKLNMIP	1.16	2.32
	A5, 5-9, 12, 13, 16-18	34	EZ761804	contig20907:1:1151:1|similar to Vigilin (Q8VDJ3)|Evalue: 2e-73	409	44250	11 (9)	29.2	383	5.59	ISQNFCDXKEAKRIRNVQQECGTLXXPKFPKQEDNSTTVKLRGPRDAVDAAKKRMLQMVDNWQSYVTIELQIXPRFYGHVMGPQGSRVGAVCEDFNVYVKFPERQRQNGDGPREEQPKTENDENGISTNGERPQETIKITGRPEDCELAKEALLALVPIEDTMDVPSEFHGSIIGPKGSRVRELMDTHKVNINIPKMSQEKSDLIRISGVRKNVDQAKAALEELIKSFEKEKEEWALQGFTLEMKVDPKYHFKLIGXXDERILRFQEQNQVDVKFPRSEDKENDTITIIGYEDKVHAARDKLQALIDKWDAQYVLDVRIDHRVHGRIIGTHGATLRKLMDKYKVDIRLPRAGDPDPDLLWITGDESNCFEAESELKRLEDLFL	1.05	2.75
	A10, 11	88	EZ762461	contig24203:161:1945:2|similar to Delta-1-pyrroline-5-carboxylate dehydrogenase, mitochondrial (A7YWE4)|Evalue: 0.0	408	66846	7	16.3	594	8.83	MISHVRTLTRGSLLNRLRQHQSLRTLTASDEYHTTGSITQQTQQTHSDSSPQNVPLQTSFSYQATNEPLLSFVTGSPERDALKAALHRYASQCSEVPIVVGEKNIRTKDVKYQFVPFDTQKRLAKFYHADRDTIHKAIDASQKVRRDWEAYPLEKKADIFLKAADLISGKYRMDMLATTMLGQGKTCYQAEIDAAAELADFLRFNVQFVFELQKYSPISTKTSQNSLRFRGIEGFVAAISPFNFTAIGGNLATAPALMGNVVLWKPSDTAVLSNYLVFRILQEAGLPPGVINFLPSEGQVFGSSIIKSPYLAGINFTGSVPTFQWIWRSVGENLRQYMNFPRLIGECGGKNFHLVHESANIESAVNQTIRSAFEYSGQKCSACSRLYVPDNIWPEFKDK…	0.4	0.45
	A19, 17-19	36	EZ762291	contig23522:1:397:2|similar to Ras-related protein Rab-10 (Q5ZIT5)|Evalue: 2e-47	408	14848	11 (7)	60.3	131	7.01	RFHTITTSYYRGAMGIMLVYDITQPKSFDNIAKWLRNIEEHANEDVEKMLLGNKCDMEDKRAISRERGEAIARQHGIRFLETSAKANINVDRAFYELSEAILDKVIKAPASESGPPNVTMGSSQKGSSCCT	2.44	3.52
	A19, 18	37	EZ762259	contig23427:1:813:1|similar to Proteasome subunit beta type-6 (Q3MHN0)|Evalue: 1e-64	406	30642	9 (8)	39.6	270	7.99	QYEKCKSQKPCSFRHYSVDFICFVYSLYRNFQTFSFFTKREKMEPKQGYDYLAKDDDFVMTPVSTGTTIVAVEYGDGLDGGVVIGADSRTTSGTYIANRFTDKLTQVTEHIFCCRSGSAAATQAIADIVAYHLGLLQVQTGEPPRVRVAAKLFQELCYNNRDSLTAGILCAGWDRFEGGQCYTIPLGGLCVRQPVCTGGSGSTYVFGYVDQNYKKGMTRQQCLEFVAKYVSLAISRDNASGGVVRLGAINKDGIERFNLLDKQIPKNWEE	1.28	1.39
	A8, 10, 14	81	EZ761121	contig17643:1:773:3|similar to Sarcalumenin (Q7TQ48)|Evalue: 2e-39	405	30379	10 (9)	44.9	256	5.41	VILVMEPDRVDIGDTMQSVLKELKDQEDELFILIEAGHKHDMEDCLRASRRLLWGVSHFLNSNEPPKVYLTNFEGADDQMCEELHERQEKQFLTDLNKVLDQQFKSRLNTIFERAIDVRNHAMMVDTYLSAYLHKKSFWGNNKNLEHDVINFPDKFHIYETVLRHSNASEDDLPEQDDYKDFFGVNKLGNFKRLADTCSFMAGCPFTKLNNAITYDLPELLEKFRERLPACLADPLECHSLEEKRYVPEKKKKKSH	1.82	2.16
	A13, 12	73	EZ761022	contig17100:280:1491:1|similar to Peptidase M20 domain-containing protein 2 (Q8IYS1)|Evalue: 2e-80	405	44723	11 (10)	32	403	5.75	MASNADILVTSLLEREREALNELSQEIWTHPELNFEERHAHAVLTTFLERHGFTLQRSYLGLETAFRAEFQSKNYDPSEHVTVAVLCEYDALPQIGHACGHNLIAEAGVAAGIGMKEVLDKDGTVEGRVVVLGSPAEEGGGGKIDLIDKGAMRDIGFAMMVHPYQFNDAYPVTLGLEGCKVEFFGRAAHASCGPWEGINALDAAVAAYQNVSMLRQQMRPDWRVHGIIMEGGVKPNIIPDRTLSDYFIRAATKGELEILKKKVISCFEAAATATGCTFRIEWDHKAYAGILNNHAMVALYKKHAMNEKIDFPSDIPIVSGSTDMGNVSVVVPSIHPRFKIGFDFIIHTKAFQEVAGSKEAQPYCVIAGKAMALTGVDIFTDKHLQNEIRREFEASRAKF…	1.04	1.28
	A18, 17	34	EZ761539	contig19529:448:736:1|similar to ATP synthase subunit d, mitochondrial (Q24251)|Evalue: 6e-25	405	11005	13 (7)	56.2	96	8.89	MASRRITKTAVDWAAFAERVPKSQESFYKAFKSKHDTYLSKVLAFPESPAKIDWDNYGRRVPVPGLVDQFRKAMEALTIPYPKDTQSSEIDKQEEA	7.89	8.62
	A13, 12-14	72	EZ761815	contig20967:116:1264:2|similar to Trans-1,2-dihydrobenzene-1,2-diol dehydrogenase (Q642M9)|Evalue: 5e-60	405	42781	13 (9)	30.6	382	6.27	MESIKNAMQNVADTLTGKADQTNALTLRWGICAAGKISQDFMANLAMMPQQHRIVAIAAESSLETANAMAKKYNIPHVYNSYAAIANNPDVDIVYIGVIHPGHYEACKTMILAKKHVLCEKPLTLLLRHTEELLRLAKESGKFFMEGCWSRCFPAYKTLTKELNNIGDVSVSRCSFANECLQKSRVCXLKSLGGGVLMDIGIYCIQAAMMPFGTKMPDEIYAHSVLSQTTGVDLTTCMTLKWGKDKVAHLVCSSLVEAQNDAVYGGTKGHLKLNSPFWAATSIDICTDLXXGEPDVTPKTESYPLPAMAAEGNFGNAGGMTYEIQDVYASIVAGKTECDLWTHEHTLTLAKIMDQIQKQIGLSYEDCYRNDKYVKQDQNASK	1.27	1.78
	A13	75	EZ759832	contig05105:1:1266:1|similar to UPF0160 protein MYG1, mitochondrial (Q9JK81)|Evalue: 4e-92	403	47763	10	29.2	421	6.25	SLRRTLQPSHRLLGRQLTRRLLLPPIALFSVVTYVRLHEFRSSEVRAMATSQTHKQIATHSGVFHCDEALACFMLRLLPQWKEATIVRSRDPAVIDKCDIVVDVGGIYDFNGQRFDHHQRSFDESMSSIQPEKRWTVKLSSAGLIYCHFGREVISHVSGLHMTNDALVLEIIYDMIYENFIQEIDAIDNGIEQSDQPLRYSINTGISKTVSKYNTKWNEKDTTETQDQRFVKAMTHVGTEFLDRVYFYTNSWLPARRIVAAAVDSRFEVDSSGQIVKIGAEGGCPWESHLLALEKEQKLEVSIKLVLYEDDRKQWRVQSVPIAEGSFISRSPLPEPWRGLNGTELSTVAGISGCVFAHHSGFIGGNESYEGVLEMARRTLASANATHAQTAQHTISEKS…	0.95
	A19, 18	38	EZ761081	contig17497:1:693:1|similar to Glutathione peroxidase (Q00277)|Evalue: 5e-45	403	26115	16 (8)	42.2	230	6.36	VPLKVQLLSDMKVLSRLLTPYLKQLSSTYVNISSNCLKSISDNQCISVSSCLQYSTKANMADPKSASSIYDFHAKDIDGNDVSLDKYRGNVCMVVNVXLQMWIYDEGYEGLAEMIKKHETEGFKVLAFPSNQFASQEPWPEPQIKEFVQQFSDRFDLFSKINVNGGETHPLYKFLKSKQGGTLGDFIKWNFTMFLVDRNGQPVKRYGPSENPQQAEPDVVAALKGQAVPQ	2.33	2.46
	A9, 10, 12	88	EZ759140	contig01301:1:967:2|similar to Bifunctional 3~-phosphoadenosine 5~-phosphosulfate synthetase (Q27128)|Evalue: 5e-140	403	36329	9 (8)	31.5	321	7.92	VSQSIPIVLPVDTSVKERLSPDGAVTLKYNGKPVAILRHLDIYKHEKEERCGRLFGTTNPGHPYIKMIMESGDWLVGGDLEVFERIRWDDGLDEYRLTPNELQQKFKELGADAVFAFQLRNPIHNGHALLMQDTRRKLLDEGYKNPTLLLHPLGGWTKDDDVPLPTRIEQHLAVMAEGVLDPKSTVMAIFPSPMLYAGPTEVQWHAKARMTTGANFYIVGRDPAGMPHPDTKKDLYNPLHGAMVLKMAPGLQQLTIVPFREAAYNDKNKRMEFFDQSKKDEFLLISGTKMRALARGGEEPPVGFMAPKAWKVLSEYYQSKK	1.01	1.29
	A14, 13	63	EZ762997	contig26338:1:1000:2|similar to Alpha-parvin (Q9NVD7)|Evalue: 5e-102	402	38441	9 (8)	27.4	332	5.1	TDIESEGRYAIDNPASPVLPIELYVPYDAQLDEGEERFVVDPASRADPKVVELCQVLIEWINDTLASHRIIVKHPLEENLFDGQVLQKLIEQLEGVKIEMPEVTQSEEGQKQKLKVVLDEANRILQIDPWHVPAPKWTVETIHSKYLVAILHLLVALARYYRAPIRFPENVACRVTVIQKKDGIVGQRQTIEEITGTYEEWGQRYERDAFDTLFDHAPDKLSIVKKRLLQFVNQHLTRLNLEVSDLENQFHDGVYLILLCGLLEGYFVPLYDYHSTPNTMDQKTQNVNLAFELMQDAGLSRPKARAEDIVNLDLKSTLRVLYNLFTKYKQTN	1.1	1.28
	A10	90	EZ762491	contig24273:237:1724:3|similar to Uncharacterized aarF domain-containing protein kinase 5 (Q80V03)|Evalue: 3e-127	402	57708	9 (8)	22.6	495	8.29	MVVLTRLSFAMRRWRPNVSDAYALKIEDLRKQIELLKNRRFWYSPWFWTIAAIPPATAALYYSVGKQERRQIRLITQGFARFVRTANIGATISLDYWWHMRGLKEDTPEYDHEIEACHQRSADRLLAGCLLNGGLYVKLGQGLCAMNHILPKEYTKTLEVLNDKALTRDVDEIEQLFEEDLGRPISEVFAKFDKKPIAAASLAQVHKATTFEGEDVAVKCQYIDLRDRFASDIKICEWLLTLVQWMHPDFGFRWVMAELKDRLAEELDFEHEARNSERCAHDLRDLPYVHIPKVYWSQTTKRILTAEFISDAARINDVPLMKNMGFSMKDVNEKLIRALSTQVFITGFVHADPHGGNVMVRKMPTGEAQIVLLDHGLYEELADVDRKNLCNFWKAIVLR…	0.65
	A12	92	EZ759419	contig02798:1:1462:2|similar to Probable cysteine desulfurase, mitochondrial (Q9VKD3)|Evalue: 0.0	402	53881	9 (8)	23	486	6.43	VVGFTLAGIFSEMPHIRWFVQSLQILRQQSRGVSGTSGVGQSAPSFNVRETRTDAEATTTKYEQDIAPQLDKYVYKKIEQEIPDIRPLYLDAQATTPLDPRVLDAMMPYLLQQFGNPHSRSHAYGWESEQAMERARKQIADLINADPKEIIFTSGATESNNLAIKGVARFYKAKKKHIITTQTEHKCVLDSCRVLEGEGFDITYLPVEKSGLLNLETVEKAIRPETVLLSVMTVNNEIGVIQPMKELAALCRSKKVFFHTDAAQAVGKIPIDVNAMNIDLLSISGHKIYGPKGIGAIYSRRRPRVRLEPIISGGGQERGLRSGTMPTPLIVGLGAACEVASEEMESDSKRVRYLSNLLIDKLTSGLPSVIRNGDANQSYPGCVNLSFSCVEGESLLMGL…	0.71
	A18, 16-18	35	EZ761266	contig18322:1:728:3|similar to Cytochrome c oxidase subunit 4 isoform 2, mitochondrial (P80971)|Evalue: 2e-21	400	27737	18 (7)	48.1	241	8.47	AFLMRYSPSKGSRVLCLLRQQQRRSASQGSVAVEQSGHSAKSPSTHATQDSHSHKHVRLGDPGAWVDRHGSVTDEPYVPEYRSVIGNREIVGFGTDGNPNYGDTSFFPYPGIRFREPDSAYDAAHQKEMSGEWSQLTIEEKKKLYRWNYCETFAEMHAPTGDWKRNVGTFAFLLAISIWLTAATRFIFPPLPESMSDENRLNQLKLMVDMQQGHVDGVGSKWDYEKGQWKEQKKSFWQFWK	2.11	4.01
	A12, 11-13	93	EZ761157	contig17801:33:1013:3|No Annotation	399	35934	9 (8)	36.8	326	5.38	MVGASALAILCLLVASALAQDQPANATATDAANATNANQTLTFNAGSQQAINDNAEMLIQYSNVTFEELNSMPQKFIFVDPAQITLSKEQLDQLGKAGKVVIATIWFFTGSARSKTPKITFKDLPNNPNIFWAKFWEPEWLDHRKGSIKNAVDSGYHGIVFKDGDDYAIYAQDRPEVQKEVPAFFKKLTADLQQSSPNLKIYLENSGLIASAPEGANVAGVMITKVPGKASKPSVAEYLEEGKKYKADNRKIFVNALVDDEAAACDFYKQCYELEFYCATFKQTIDGDIQGCPSVKVTDKARPHVYAKENLDYEAAKTHSLGGTVA	1.02	1.2
	A13, 14	76	EZ762361	contig23772:17:1069:2|similar to 26S proteasome non-ATPase regulatory subunit 13 (P84169)|Evalue: 8e-65	398	40929	10 (8)	31.1	351	5.99	MAVYEYLTQKKSQSASNNQHSVWTEMADLYDRRLWYQLSLRMRDLVKNEEFVRSAGGMSELYKNFIQDFEYRISPFTMAEIAVDIASKMFPDREAAIQYLESARKKIKSDIAADCYLQTAIGQLRLKGEEHAEVKKLLEEVEKKLRTIDNVTIAHPPFYELSSEYYRLHGTYAEYFREALKYLGCIDINKMSSDEKRMRAERLTIAAILGEGIYSFGELLVHPITAALQTPQTEWLYKSLMVFNHGNIRGFKDLRAQWLKNVPEATKLENEMHEKLQLMAIVELGFKLAAHDRNIAFAEIARITEESPDKVELLLMRALSLQLVRGDIDEQSQIFNMNWVKPRVLNMDQIM	0.86	1.12
	A17, 4, 5, 16-20	47	EZ761820	contig21008:1:747:1|similar to 60S ribosomal protein L10a (Q963B6)|Evalue: 1e-88	397	28343	15 (6)	35.5	248	9.74	ECSVLRRRTYDSPDVHNSRHFLVVSSRLYVKMSSKISRDQLYECVNAVLESSKTKERKFVETVELQIALKNYDPQKDKRFSGTVRLRHIPRPKYKVCVLGDEQHCDEATANGVPAMSADDLKKLNKNKKLVKKLAKQYDAFLASDALIKQIPRLLGPGLNKAGKFPTLLSHSENMNVKVDEMKATIKFQMKKVLCLAVAIGHVQMAPEELAANVSLAINFLVSLLKKNWQNVRSLHVKSTMGPPQQLY	1.18	3.12
	A15	51	EZ761448	contig19105:36:1151:3|similar to 2-oxoisovalerate dehydrogenase subunit beta, mitochondrial (P21953)|Evalue: 2e-130	397	40989	8 (7)	28.6	371	6.32	MFLQKCAQVLALASKPVVSGTQWSLVRHASSRFEYTPETASANLGPTTKMNLFQALNSAMDVALQTDKSALVFGEDVGFGGVFRTTINLQEKHGKDRVFNTPLCEQGIAGFGIGAATAGATAIAEMQFADYIYPAFDQLVNEAAKYRYRSGNLFNCGSLTVRSPYGAVGHGALYHSQSPEAYFAHTAGLKVVIPRGPIQAKGLLLACIRDANPCVFFEPKVLYRLASEDVPNGDYTIAIGKAEVLVEGKDVTLVGYGTQIHVLKEVVQMAKEKLKISCELIDLCSIIPWDAETVCQSVAKTGRLLISHEAPITGGFAAEVAAYVQRECFLNLEAPIERVCGYDTPFPHVLEAFYLPDKHRCLESLKKLMSY	0.72
	A11, 10, 13	94	EZ759045	contig00798:1:1071:1|similar to Alpha-aminoadipic semialdehyde dehydrogenase (P49419)|Evalue: 4e-131	396	39000	13 (8)	26.1	357	5.36	SVCRTFKKMSSSKSNSFLVNRPEYSWLKELGIDETNCGVFSGQWSSRGETVSSVSPFSNEAIAKVTMGTVDDYEEAVSKSVEAFESWRNVAAPKRGEIVRQIGDELRKKRDGLGKLVSLEMGKILAEGIGEIQEYIDICDYATGLSRMFDGKVLPSERVGHVLLETWNPLGCVGIISAFNFPAAVYGWNNAIAMVCGNTMVWKPAPSTPLISIAVMKVIEQVLRQNDLPLAICTLVNGGADVGSSMSKDERLPLLSFTGSTAVGLKVASEVTSRFGAPLLELGGNNAVIVAEDADLDMVIPSVVFGAVGTAGQRCTTIRRLFVHDSLYDEVLRRLKSAYAQVPTRLGDPLDPNTLYG	1.26	1.52
	A15, 14-16	52	EZ759382	contig02624:1:558:1|similar to Inorganic pyrophosphatase (Q9D819)|Evalue: 1e-52	395	21323	9 (5)	43.2	185	4.81	TWEDPSHIPEETGAKGDNDPLDVLEIGYKVATRGQVMQVKVLGLIALIDEGETDWKVITINVEDPMSQELNDIDDVERLMPGFLQNTVDWFRRYKMPDGKPENQFAFNGEPKGREFALRILRDTHQYWRDLMTTKEDKEPSRANTTLKDTPYCIATSSAESFVSKHAKFGTPQALDSQIDKWHYC	1.41	1.73
	A10, 9	93	EZ759445	contig02919:1:1204:2|similar to Leukotriene A-4 hydrolase (Q3SZH7)|Evalue: 3e-130	394	46377	8	21.5	400	4.96	QIGPRSTVWSEPDMVDRAAYEFAETEQMLKAAEALAGPYVWGVYDMLVLPPSFPFGGMENPCLTFLTPTLLAGDRSLANVVAHEIAHSWTGNLVTNVNWEHFWLNEGFTTFLERKIKGRLSDESHRQFAAIEGLNSLKNEIKTRGADNEFTKLVIDLSNSDPDDAFGTVPYEKGHTLLFYLEQLVGGPSVFEPFLREWIDKYKLKTANSFQFKDFFLEYFYEKIASDTLQTIDWDTWFFGTGLPPVIPNYDNTLGLKCDALRRKWMDTQDYSQFSRSDLEAFSAAQKIDFLALLLEEESVTREKLEAMEQVYEFSKTQNAEIMLRWLRLCIRAKMENIVPLAVSYAVTNQRMKFCRPIFRDLYAWDETRDVAIKAYEEHKDTMAYITSSQLAKDLHLQSH	0.73	1.14
	A11, 12	95	EZ762323	contig23646:1:1482:1|similar to Cytochrome P450 2J2 (P51589)|Evalue: 1e-63	394	57247	9 (8)	20.3	493	5.55	CIIVLSILYCFRHFICRFVDRILKRVPDGPPIRPIIGTIGVDXLYPHKTMMEWAKEYGPIYSLLFGSRFTIAISDMNIIRKIFKDDRYSGRTSEGTFFHVKSEYVDPKMGPRGIVFSDGEVWKQQRRFALSALRDFGFGKDRGQQIIADEATHLRDLMKEHDGEPFDPRLIIANTVSSVISSLLFSDSFSVNDDRFTRFIDYVNSDFQQSRETALLDVYPVLRYIPPFKSTFQQLDSNFKNEMQILHDLIEEHKKSFDSENPRDYLDAYFRMQSDSGQDSTFTDSQLINNVLDLYVAGYETTTTFIRWACVYLIHNRNVQEKVQQEIDRTIGSARLPTYDQHTDLPYVEAVTLEVFRHSMFLPFGVPHQTLEDVQLETYRLPKGTDILPLFCAHNMNKS…	0.65	0.71
	A5, 4-7	36	EZ760846	contig14012:1:1036:2|similar to Myosin heavy chain, non-muscle (Q99323)|Evalue: 4e-103	393	40376	8	25.2	345	5.44	ADIVGMGVAVAAETQFGVRTKKGMFRTLAKRIXGTTDEADEYVTQHKPQFCPLYSAEFGEEKRQIDALLVLDQLRCNGVLEGIRICRQGFPNRIPFQESVSDXELLTPNCIPKGFMDGKKAVEMMIKALELDANLYRIGQSKIFFRAGVLAHLEEERDLKLSDLITCLQAYCRGLLSRKNYQKRLQQLNAIRVIQRNCAAYLKLRNWEWWRLFTKVKPLLQVTTQDDIRISMEGELKGTKEKLERVSLDYGELERKFAQLVEEKNIVAEQLQKETEDCAEAEEMRARLSARLQELEEILHDTEIRLEEEEIRVQELSQEKKKLQQNVADLKEQLEEEETVAQKLQ	0.88	1.3
	A8, 9	84	EZ759179	contig01553:1:2297:3|similar to Glycogen [starch] synthase, muscle (A7MB78)|Evalue: 0.0	393	87769	10 (9)	12	764	6.66	FGDALTVNFWPLRRTTEQRIPYASSLQSFCCTVRFILVSQSFAAESLLKDGYYAIKMGERKLKRSASISRTLLKLEGLDTARNTDRGYAAALDNKFLFEIAWEVANKVGGIYTVLRSKAQTTVDEWGDQFMLLGPYNEQTVRTEVEILEPDSIALRQTINSMRSQGIGVTFGRWLIDGYPKVVLFNIGSAAWKLDEWKKELWEAASIGIPWGDTECNDCLIFGFLVAXFLGQFRANVEGEPYIIAHFHEWLAGVGLILCRTRGIDVSTVFTTHATLLGRFLCAGQMDFYNNLAKFNIDKEAGDRKIYHRYCMERAAVHFADVFTTVSQITGIEAENLLKRKPDVITPNGLFVKKYAALHEFQNLHALYKEKINDFVRGHFYGHHDFDLDKTLYLFTAGR…	0.39	0.59
	A17, 18	49	EZ760645	contig11431:61:646:1|similar to Glutathione S-transferase omega-1 (P78417)|Evalue: 4e-24	393	22216	11 (7)	60	195	5.28	MVVSDDVETLSAGSPAPVLSTDKLVMYNARMSPFCQKIRMFLNVKGIPFQVINVDLKNKPDWFRGISPLNLVPIIVEPNGNVLYESVVMAEYLDDKYEGKRRILPSDLYERAKEKMLIQVLLSKIDQPTRSMAIAPKPDSLENLLKAYDFVESQLTRPYLAGNQMGMSDLMMFAHFDRAAAIFSINGFDFEEQRQ	2.55	2.7
	A18, 16-18	36	EZ761224	contig18104:168:770:3|similar to Serine protease inhibitor dipetalogastin (O96790)|Evalue: 1e-14	393	23025	15 (9)	49	200	6.36	MELSLLLALIVSFTCFSRESLAYDWGIVSEPIVDPCKCTKEYKPVCGVNGKKYSNQCMARCAGIEIDTTKDCGVIRVTRPPVDSESQNINVDPCKCTKNYRPVCGVDGNQYSNECMARCKGVQVDTTKDCGLIKRPEGVILPTAGREDDAKTTDEPCRCAKLYRPVCGVDGKVYSNECMAECKGVEVDKTRDCGVLVVRP	3.47	6.03
	A6, 6-9	40	EZ759987	contig06053:1:967:2|similar to ATP-citrate synthase (Q91V92)|Evalue: 1e-128	393	35081	7 (6)	27.7	321	5.41	SLRSAYDATIEVMQFPQIRTIAIIAEGIPENLTRKMNKVAHEKGINIIGPATVGGIKPGCFKIGNTGGMLDNILASKLYRPGNVAYVSRSGGMSNELNNIISRSSNGVYEGIAIGGDRYPGTTFIDHIMRYEQDPNIKIIVLLGEVGGVEEYDICDAIKSGRITKPLVAWCIGTCASMFTSEVQFGHAGACANAEKETAAAKNQALGLAGAVVPNSFDELGKKIREVYDALVADEQIVPQDEVPPPPVPMDYAWARELGLIRKPASFMSSICDERGQELLYAGIPISDIFXXXCIGVGGVLSLLWFQRRLPPYAAKFLECV	0.72	1.21
	A16, 15	63	EZ761354	contig18732:1:1015:2|similar to Carbonyl reductase [NADPH] 1 (P47844)|Evalue: 3e-73	393	38424	9 (8)	35.5	338	8.51	FCFCHLVKRKQCQLFICRFTPYFDLRSNLFCYILQVTLRLFPAFLSEKTVGXLWKMSVKRVALVTGSNKGIGFAIVRGICKQFDGDVYLGARDETRGKEAVKQLESEGLRPQFIQFDVTDKRSIERARDHFKSNYGGLDILVNNAAIAYKSNATESFGEQADATIDTNFFGLLDVCRLLFPILKPHARVVNVASSSGKLTILKDEELKKRVTSDELTIDELEEIMKEFVEFAKKGSHQEKGYPNTAYGMSKLGVIALTRVQQRLLSQRSGEDLIVNSACPGYVDTDMTSHRGTRTIDEGAANEIYLALLPSSDPNNTDQKLPKGEFVYDKQVKNWVGG	0.94	1.22
	A9	91	EZ760961	contig16533:1:782:3|similar to Stress-induced-phosphoprotein 1 (Q4R8N7)|Evalue: 7e-84	391	29707	9 (8)	28.2	259	8.59	CMKAVDVGREHRADYQLVAKALARIGNAYTKLNDYKNAKAYYQKSLAEHRAPDIVKKLQEVEKLLKEEEAKSYVNPEVAEEEKNKGNEAFKKGSYPDALKHYTEAIKRNPTDVKLFSNRAACYMKLLEFHLAIKDCDECERLDPTFVKSYIRKGSAMMAIKQTSKAVHCFEKALSLDPNSDEAREGYEKAMASNASDPELARKQAMEDPEVQKILYDPAMRLILEQMQKDPKAVREHLKNPEVAAKIDKLINAGLIGMR	1.1
	A10, 9	95	EZ761611	contig19884:167:2023:2|similar to Glucose 1,6-bisphosphate synthase (Q8CAA7)|Evalue: 0.0	390	69944	7	16.5	618	6.36	MTSKHKTEALKSSGLNNSDVIEKARQWLEWDRNPKTRQYIEELQRNNNNEELRARLMERIAFGTSGLRSSMGAGFAHMNDLVVIQATQGLAEYLLQKGAEVRTRGVLIGYDCRHNSERFAHLAANVFLHKQIPVFMYSKICPTPFIPFGVTFLKCVCGIMVTASHNPKEDNGYKVYWSNGAQIISPHDKNIAASIAENLEPISSVWDVTETRGQCKDPLSDVLREYLESLKQMSLYSDINASTEVSFVFTAMHGVGYDYVVEAAKTLKFRPFIGVKEQIRPDPEFPTVKYPNPEEGKSALDLAIATAEQHNARIILATDPDADRMALAEKLVSGQWKIFPGNEVGTLLGHWMWHCYVQKMGGAVDAKNVYMIASTVSSKMLRVIATAEGFNFAETLTGF…	0.38	0.43
	A13, 13-15	81	EZ760036	contig06371:1:683:1|similar to Cathepsin L1 (P07154)|Evalue: 1e-16	390	25435	10 (9)	41.4	227	9.21	GQMGKRINGIAHLSKAERRKKLFGLVKTKKGGTTRKLPNRGWGGKPVQDAYQFTRFPGDASNSRIETVDWRTKGVVNTPPSQNPCGSCYVFAGVAVMEAQYMLRKKQKVKLSEQYIRDCVYDPRFSDITRTPCDGGTLMSAFMLASAIQIPSEADVPYQQDETPRPCNLRRGYSINVTDIVEVQGDEAMMAALRAVGPLAISMDASELGDDWNQWDGVNPPVFTPTR	1.68	3.33
	A9, 8, 11-13, 16, 17	92	EZ760741	contig12271:1:402:2|similar to Heat shock cognate 71 kDa protein (P19120)|Evalue: 2e-47	388	14834	13 (6)	58.6	133	5.88	FDFSLELXITKASDSLTSSHFTLIAYPLFTRLLTVNXLSEMSKAPAVGIDLGTTYSCVGVFQHGKVEIIANDQGNRTTPSYVAFTDTERLVGDAAKNQVAMNPQNTVFDAKRLIGRKFDEETVKSDMQHWPFK	5.38	10.32
	A19, 16-22	39	EZ762284	contig23494:325:819:1|similar to 40S ribosomal protein S10b (Q9VWG3)|Evalue: 9e-38	388	19088	21 (6)	40.9	164	9.82	MLMPKKQTRQIYEYIFNEGVLVAKKDVHLAKHPLIENVPNLHVMKLLQSMKSRGLVKEQFAWQHYYWYLTNEGVSFIREYLHLPSEVHPATHQQRQRTDTQRAKPLARERPEGPSGTSDRADYRKAMDAKKDVNLAPGQELEFRGGAQSQYRGFGRGTPRPQQQ	4.08	8.4
	A12, 13	96	EZ762595	contig24591:1:820:2|similar to Eukaryotic translation initiation factor 2 subunit 2 (Q99L45)|Evalue: 5e-63	386	31349	7	23.8	273	4.95	TATDDRAEAVRDADEDQENHASNRSKDSELTTGKDADDNEEQLDFSKKKKKTKKPVKLDEDEDQATSKDKEKEGDDDENDGEDFGEFDPNMKKKPKGKVTFEDDIDEALVDETDGTEFVESADTLDSKIRLAPSANLMKGAWLGSDRDYSYDELLTRVFDIMREKNPEYIGGEKKKIVMRPPQVVRVGTKKTSFANFTEICKIMRRQPKHLIAFLLSELGTTGSVDANNQLIIKGRFQQKQIENVLRRYIKEYVTCHTCRSPETLLQKDDQTR	1.03	1.25
	A19, 19-21, 23	40	EZ762127	contig22869:1:714:1|similar to Proteasome subunit beta type-2 (Q5E9K0)|Evalue: 2e-53	386	27278	10 (6)	40.9	237	7.29	DCKVYIINSFESERFSVVFRFIFRLSFGSFGHFATGKMECLFGIQFKDFVLVAADTVSAFSVIALHQDINKSYRLGEKLLLLTNGETGDSEQFGEYIHKNLKLYRMRHGYDLSPSAAAYFVRHQIAEFLRSRTPYHVNMLLAGHDEFEGPSLYYIDYLGTLVKVPFSVHGYAASFTFGLLDKHYREDMSEAEGVQLLQFCVNELYKRLILNVPKLKVHKIDSKGVQLLGDVYPTIKA	1.51	2.16
	A18	40	EZ761797	contig20875:1:776:3|similar to FK506-binding protein 7 (Q5RET2)|Evalue: 1e-39	386	29026	10 (7)	40.9	257	5.25	SSLVTSSCRLVSSVVRRFFVDKSIRIRGLFSADKPLHLPLDSLLESSIKMSALQLIAFLVVCTALVRTQDELKTEVTFKPENCDRVSKNGDMLIVHYTGYLAKDKTKFDSSYDRPHPFNFQIGAGQVIKGWDQGLLNMCKGEKRELTVPASLGYGDRGAGNLIPGGATLFFETELVDIQEAPPAVNVFKQIDADADQKLSKVEIFKFIQKQMEQNPEAKRPDEETDKIVNEIFTNEDADQDGFISHDEFRGPKHDEL	1.14
	A5, 4-9, 16-19	40	EZ760960	contig16520:66:1137:3|similar to Ankyrin-2 (Q01484)|Evalue: 3e-93	385	39936	6	22.4	357	8.68	MGRRNLNEEILRDVEARKERGEIPQSPPEPTYYTATVGHEPQLKEYKSELIGNYVPDNVDLGRSPIMHAGFLVSFMVDARGGAMRGCRHSGIRVIIPPRKAPAPMRITCKYLTKDKVITPPPLMEGEGIACRILEMGPATAKFLGPVIIEIPHFASLRENEREITILRSENGHTWREHTLEATEEAVQKVLNESFDXNELSAIEDLQTNRIVRILATDFPLYFAIITRIRQEVYAIGPEGGMIQSNLDQKVQALFPEGSLTKKIKVGLQAHVIPAEMVARLLGNRVAVSPIVTVEPRRRKFHXPITLSIPLPRAAGKGMVNQYTSDSPXPAPPPRVAVREEEFISSRDIAPPPPIRA	0.49	1.58
	A9	93	EZ759029	contig00707:1:1070:1|similar to Stress-induced-phosphoprotein 1 (Q4R8N7)|Evalue: 6e-43	385	38758	6	21.9	356	4.72	GNCFESFLKLXEAASVIPCFGVISVSXIAIDMGSKVAELKDRGNAALSANKFDEAIAAYSEAIELDGTNEILYSNRSAAYVKAGQYDAALSDAEKTIELKPSWAKGYSRKGAALQYQDKYDEAIATYNEGLKHDPTNAQLTDAIAECRSQMSSAGSGGGGMPGAGMPNFANPFSAPDLMLKLRANPKTRAFMQQPDFLQILSKLQQDPKSLMQYLNDPRVSAALGVLFGINMDQMGDDDMDTEDMPMPDASTFASANKPSETQSESKAQTSTSSSTKPTATKATAGTTKDKPSNLSAQQSEAWDEKEKGNEAYKKKDFDSALSHYDKAIELDAENMTYLTNKAAVFFEQEKYEQCI	0.64
	A11, 11-16, 19	99	EZ760608	contig11075:81:1535:3|similar to Dihydrolipoyllysine-residue succinyltransferase component of 2-oxoglutarate dehydrogenase complex, mitochondrial (Q9D2G2)|Evalue: 6e-109	385	52623	11 (8)	19.8	484	9.53	MLPLVVARATSGVLRRSSALAATFRSRSYVTGALTKRSQSVSGLSRQKSYIIGTERQLHCSAIYFDDVRVIKTPPFAESVTEGDVRWHKAAGDQVKEDETIGEIETDKTSIPVNSPAAGVIEALLVQDGEKVAAGTALLKLRVGATGGATKSAPKEAAQQPQQQQQQQQQRPSQQQQPQQQPQQQQRSSEGSRTGASDQSAPIPRDAPQVPPPPKEPMRSKPASSVPVTPMQSSQSQGAQQSSKDLNMPSGARSESRIKMNRMRLRIAERLKEAQNTAAMLTTFNEVDMSNVIAMRNKFKDPFLKKHNVKLGFMSPFIRAAAFALKDQPVVNAVIDGTEILYRDYIDISVAVATPKGLVVPVIRNAENMTYADIEKALGQLSEKARDNALAIEDMSGGT…	0.63	1.56
	A15, 16	54	EZ761324	contig18616:1:460:2|similar to Calbindin-32 (P41044)|Evalue: 2e-15	385	16891	8 (7)	62.5	152	4.63	LNTVIHYADKNSPGLDPTLLDEYTAAIMTLYDKDGDGKLTLSELSGLVVPKNNFLGNCAGMLKGVVSKDEIDDVMRAYDRNNDGYITKEELSGLLKDFFDLCKVDASAEDIRYLGDNLIAICGKADTNRLGRKEVITILSTIADMAKREAYQ	2.59	2.79
	A16, 12, 14-19	66	EZ758907	contig00034:1:710:3|similar to 60S ribosomal protein L8 (Q6RYS3)|Evalue: 7e-90	384	25398	11 (7)	43.4	235	10.18	VKDIIHDPGRGAPLAVVAFRDPYRYKTKKELFIAVEGMHTGQFVYAGKKATLAVGNILPLSSMPEGTVVCNVEHKTGDGGSLARCSGNYATVISHNPDANISRVKLPSGAKKVLPMNNRAMVGIAAGGGRIDKPILKAGRSYFKYKAKRNCWPYVRGVAMNPVDHPHGGGNHQHIGKASTVRRDTSAGRKVGLIALVVLVALGVSRSKLAKARTSRPSTTILLSYYVESIRESEQ	1.68	4.7
	A16, 15	67	EZ759863	contig05263:1:701:3|similar to Phosphatidylinositol transfer protein alpha isoform (P48738)|Evalue: 6e-71	383	27599	10 (9)	44.4	232	7.8	LKNEPYDNYPLLDGQYASGQYTHKVYYLASKVPGFAKMLAPKGSLEFHEKAWNAYPYCRTVFSNPDYMKDNFFLSVESLHVADQGTSDNVHRLPPEKLKKREVIMIDIANDHIDRKDYKEEWDPQKFRSQKAGRGPLTGNWKDNVKPVMCCYKLVTIEFKWFGLQNKVESFVHKAERKLFTNFHRQVFCWMDMWYGLTMEDIRVIEEKTKADLDAQRNIGEVRTQYAPVEEH	1.79	2.56
	A14	67	EZ762563	contig24491:87:998:3|No Annotation	383	32165	7 (6)	34	303	9.05	MEHSRKAAVSLILLALINAHVVFAQEELNFQNQQIFQQNLMKQKGSNSNASGGSVGSVSADSGSGTNINTNNVKSTDEGTSGDSFSAQTGQGTKLNLNGASQISGSGNSALQSATQNNAASQTAVQSKKMCMRCENRQYPAEHACTVISRDPKFPQRVCIPISEGSTANFRNPGPQTAGYGPVQPTMSRQEPAAAQVVEQTNALTQSQLQELKQKQKLCQSSGQGGSTGQLTADTGSGTNINDNKMNTDKRGTSVNSFSAQSGSGTKLSLSGASQAQANNACTQEVQKWIQKTQQIAIQHGQL	0.8
	A8	87	EZ760481	contig09722:1:1670:3|similar to Dynamin-1-like protein (Q7SXN5)|Evalue: 0.0	381	62562	6	14.4	555	7.72	VQIRELILKYISNPNSIILAVTPANTDMATSEALKLAKFVDNDGRRTLAVITKLDLMDAGTDAMDMLCGRVIXVKLGIIGFIARSQADIKANKTIDEALKDETTFLQRRYPSIASRNGTPFLAKTLNRLLMHHIRDCLPDLKTRVNILSSQFQSILNSYGEPVLDKGQTILQILTKFAAAYCQTIDGTAKNIETTELCGGARICFIFHETFGKALESVDPLGGLSQLDILTAIRNATGPRPALFVPEVSFELLVKRQIRRLEEPSLRCVELVHEEMQRIVQHCGSEIQQEMLRFPRLYERIMDVVTALLKLRLPPTNAMVENLVGIELSYINTKTPXDFHDAASLVGALLRESQRNETQSLTKDQKVTFAPRTEAGIENGIESKPGAGLSLLSSGRAVN…	0.36
	A8	86	EZ760209	contig07623:1:1128:1|similar to Peroxidasin homolog (Q3UQ28)|Evalue: 6e-59	381	42915	6	19.9	376	8.69	IPATDPFYKQFSQRCMEFVRSLPGPKANCNLGPRDQLNQLSAFIDAGMVYGTTAEEVKSLRSFFARDAKVISPIPQKSKXXXSATWRIRWXRVWMERRTNLAFKAGDVRANVQIGLQTMHTLWMRHHNNVAEQLLALNPNWDDETVYQEXRAIIIAQIQHITYNEWLPLLVATLSYNKXKLLLSEQKVNQYNISVNPSMSNEFATAAFRVGHAMVTGTFDRLSLNLQSTVKNDKMSDTYFKSAHLYQENAVDQVAMGLCQRPGKIVEAEVTGELSQRLFKTSPDFGLDLVALNVQRGRDHGLPDYMKYRAFCGFPTANNFNELKALNIMSEAVVNRFASIYKNVQDIDLYVAGLSENRLPDAFIGPTFACLIGEQF	0.56
	A12, 13, 16-19	98	EZ763262	contig27912:108:869:3|similar to Trifunctional enzyme subunit beta, mitochondrial (P55084)|Evalue: 3e-81	381	27648	10 (7)	29.5	254	9.46	MLTARTTLHTTVRCASAASHAARTKAEQTRYXLSNANNKNVVLVEGVRTPFLVAGTHYKKLMPHDLARQAINSLMVKTQIPKDAIDYLVMGTVIQESKTSNIARDAGLGAGISNRTPCHTTTMACISSNQAITTGMSYIQSGQCNTVVAGGVDFMSDVPIRLNRRMRKILLDMNKAKGTMAKLSLASQLFSPSVWAPELPAIAEYTSGEVMGHSADRLCAAFGVTRKESDEYALRSHTLAAEATKQGLLSEIVP	1.79	3.25
	A9, 8	94	EZ760246	contig07914:1:483:1|similar to Heat shock 70 kDa protein cognate 4 (Q9U639)|Evalue: 9e-73	381	18328	16 (8)	43.1	160	4.86	PGVLIQVYEGERAMTRDNNLLGKFELTGIPPAPRGVPQIEVTFDIDANGILNVSAVDKSTXEKKNKITITNDKGRLSKDDIERMVRDAEKYRAEDESQRDKVQAKNALESYCFNMKSTVEDDKLKDKVTDADRKLVVDKCNEVMSWLETNQLAEKEEYEQ	5.42	5.82
	A13, 12-14	82	EZ761891	contig21534:1:845:3|similar to Acetyl-CoA acetyltransferase, mitochondrial (Q5BKN8)|Evalue: 2e-97	381	29715	8 (6)	28.6	280	7.08	GGMESMSNVPYYLTRGEVPYGGAQLLDGIVFDGLTDFYQKIHMGVCAEQTAKKMGISREDQDRYATDAYRKSIEAQKDGSFAKEIVAVTVQQRGKPDATVNEDEEPKKARLDKMAALKPAFMKDGGTVTAANASKLNDGAAAVVLMTEAALKKHNATPLARIVSFSDAARDPAEFTIAPADAVPIALKRAGLSKDQISLWEINEAFSVVALANQKLLGIDPFILNIHGGGVSLGHPIGMSGARITSSLVYNLKAGQFGCASICNGGGGASAIILQKLSDK	1.1	1.45
	A11	102	EZ759660	contig04037:108:1667:3|similar to Succinyl-CoA:3-ketoacid-coenzyme A transferase 1, mitochondrial (B2GV06)|Evalue: 0.0	381	56816	8 (7)	15.4	519	5.96	MLALQRLRPSTSRLLYSLHQNCAAFSTSSTRLDPVIYTDAIEAVKDIPTGAKLLVGGFGLCGIPENLIQALLKTSVKELTIVSNNCGVDDFGLGLLLQTRQIKRMISSYVGENAEFMRQYLSGELEVELTPQGTLAERIRAGGAGIPAFFTPTAVGTLIHTGGVPIKYGADKKVAIASDTRESREFNGQEFIMEEAIRGDFALVKAYKADKLGNLIFRKSARNFNPAMCKASPQTIVEVEEIVEVGELDPESIHVPGIYVHRLIKGQKYEKRIERTTLKKEEKKEKASVEAPDNIDEMNRARIIKRASKEFKSGMYVNLGIGIPMAASNHIPKDMTVYLQSENGILGLGEYPTKDQVDPDLINAGKQTVTVINGSSYFSSDDSFAMIRGGHVDLTMLGA…	0.48
	A10	96	EZ759204	contig01682:160:1764:1|similar to Protein prune homolog (Q86TP1)|Evalue: 9e-49	380	59840	6	16.1	534	5.55	MEKNRMGFLEYLSQTRDDLKRLTEFDVVKLVVGNEACDLDSAVCSLVLAYHLFKSRSSAKEAVIPVLNIQRQDYALKTEVRYVLQSQGIEERDLVFADAIDVNALSTEAKLSLVLVDHNHPVSVFTPFVSDVQLIVDHHSTDPRNTTLRNVEKTIELVGSCATLVAEILLTSAQSGALSSVTSYLLYQTIILDTCNFSTSARKATPKDHEIAEKLAKTISVLSTKEQIYSSLIDAKSDVSGLNVQQLLRKDLKILELHNLRVAVSSIPVLVKDRIIGEDSLRDIESFCELGNYNACVVLGVQLTAQIERDLLVYASDSSLLSNITDGLSESKDVDLQLRDSSSLLPDRSNHRYMFQGNCMISRKQFLPLLRRLIEDTCFMGIGALRDEISLLNDIKPTA…	0.38
	A8, 5-9, 16	88	EZ761213	contig18052:1:207:1|No Annotation	380	8150	14 (6)	82.6	69	4.55	AQDKAFESLYNGKFDYSDQVTFKGDQYDTDDATKRGYVFSNIKYATSNRFEIPIINEDFSYMNDENRQK	24.65	35.33
	A18, 17	42	EZ761892	contig21546:1:917:3|similar to D-erythrulose reductase (Q8JIS3)|Evalue: 1e-77	380	33087	8 (7)	28.3	304	6.02	LLKTFGLCSRPLTSAFNPEPSTQVASISFTLELLXKMDNFFLNKYALVTGAGSGIGRECAIELAKLGAKVYALSRTKENLERLVEEEPRIHPVCVDLSDWTSTRNAVESLLPIDLLVNNAGIAQIQPFLDTTEDSFDEVMNINLKAVLNVSQVVAKSLVSLGKAGSIVNVSSAASKQGIVGHASYTASKAGLDGLTKVMAVELGPHNIRTNTVNPTVVLTEMGRRNWSDPKKSSEMLARIPMHKFGETSDVVNAIVFLLSDKSQFVNGTSLMVDGGLLVXLTTDHVTRRSLNTMALYLQYIESE	1.15	1.48
	A11, 12	103	EZ759985	contig06046:155:1205:2|similar to Aldehyde dehydrogenase family 3 member B1 (Q5XI42)|Evalue: 4e-95	379	39781	7	25.7	350	5.7	MRLVGDYDGECEALVQKLRNSYDARKTRPLEFRLQQLRNLRRFLTENTDLICAALWQDLHKSRQETILTEIDIVIKEIDNALANLKSWMQPQKVEKELATIADKPYVIHEPLGVVLVIGAWNYPVNLTLAPMVGAIAAGNCCILKPSEVSQATEKLLDDLLLQYLDKDCHAVLCGGAKETSSLLKCRFDHIFYTGSTTVGKIVYKAAAEHLTPVTLELGGKSPVFVDEDCDAAFTMRRLLWGKTLNAGQTCIAPDYVLCTEATQEKLISAAHSELRKLLDNPKTSPDFPRIVNDRHFERIKKLLDAHPQNNVVLGGQTDATERYIEPTILKNVDPESPIMKEEIFGPILP	0.75	1.13
	A16, 15	69	EZ762499	contig24297:1:452:3|similar to Calbindin-32 (P41044)|Evalue: 3e-14	379	17479	7 (5)	51	149	4.76	FLYNNVTRNSKLGELSNELLDEYTRAVMLYYDKSGDGRLHLSEFAKLFPTLEDLTTICTDKFKPDLKTVDLEKIFAQYDKNKDKLIGEAELEALCKDLLDYSMENYHLNDVQNLQATFMKACDQDKNGRLDAREMQLVFELLEKLETGK	1.43	2.13
	A11, 12	104	EZ759617	contig03812:575:1582:2|similar to Annexin-B12 (P26256)|Evalue: 7e-85	378	37434	6	21.2	335	8.66	MAGAPMGTPGMQQVSADVPTLTPAATFDAEADCKVLHKAMKGLGTDEKAIIQILSNRSNSQRQHLITTYKTSYGKDLIKQLKSELSGDFEHAVVALLMTPDVYDASELHDAMDRMGTKESVLIEIICSRNKQELMAIKAAYKTKHKKDLEKTITSETSGYFKRFLVASLAGGRTDENVPVDLAKAQADAKALIDAGPKRWGTDEATFNQVFGLRSFAHLRVVFDEVKKIANKDIEQIIKGEMSGDVEDAFLAITRLVRNKYAFFAKRLYDAMKGAGTSDKQLIRVIVSRCEKDLNNIRMEFHKMYGKTLESFIADDCSGDYKRLLMAIVNPSSRQ	0.66	0.75
	A11, 10-13, 16-19	105	EZ761670	contig20136:95:615:2|similar to Probable methylmalonate-semialdehyde dehydrogenase [acylating], mitochondrial (Q17M80)|Evalue: 2e-57	378	19453	10 (7)	41.6	173	8.98	MACTTLKMFALTRFATGNRLFIRTYASASAVRVKNFINGKFEDSKADQWIELRNPATNEIISLVPKSTQQEMDAAVSAAKTAFKTWSRTSILARQQVMFKFQALIRENMKELAHLVTLEQGKTLVDAEGDVLRGLQVVEHCCSITSLQLGETLPSVSKDMDTMTFRVPLGVCA	2.06	4.36
	A11	106	EZ759035	contig00737:121:1632:1|similar to Uncharacterized peptidase C1-like protein F26E4.3 (P90850)|Evalue: 5e-96	377	58300	7	15.5	503	8.7	MSRFSRNRRLFLCKSQLARHVLHSRNDNCSVPIDGTYCYCDDFCDRRGVDDFGDXFPDYYVYCKGQLSPVTSSPVTTTRRTPLQTQGCIVDGITHASGSTFKRNCNQCACDYSPDSSSQGLVSCTQDVCLIREDLIEQINANSGILGWQATSYPAFLWTDIEEWDXLYRLGTLKPERLVSSMHEIKIDVNEILPARFDARTRWPNFIQGIEDQGNCGASWAFSTTELASDRLAIMTKGQTNVRLSPQHLLSCNKNSQMGCEGGHLDRAWWFLRKRGVVSEACYPYTSGQTNRSETCFVSSVDFIXXFLDCPSGSVDTTVYAATPPYRIAQNEEEIMFEILRNGPVQAVFRVYPDFYMYKSGVYRRSNFFMSAPKEYQETGYHSIRIIGWGIDYTAGNPT…	0.39
	A10, 11	97	EZ762048	contig22544:1:1273:2|similar to Ectonucleoside triphosphate diphosphohydrolase 2 (O55026)|Evalue: 7e-39	377	47757	8	19.9	423	8.89	LVQQYGSMECGRSLSSFEKEPHNVAAIMRPCMEYAKSNILQSKWSSTNVYLGATAGMRVLSQSNPRASQAIFDNLLNYLRTFYPFVVKPANFRILTNEEEGGFGWTAINFLETSASLKTSNGQKGNEQISSTGYLDLGGASTQISIEVDPRQSVNATFVVRLFGKLRYVYTKSFLCYGADEAYRRYSGFLIRDHNLRNGVMRISDPRNPSIPNNVQDPCRPLDCTGKVTYNEAFGLLCSNRSLPLPARQVSYNTIGTARVGQCRDTISYLFKETLDQQPSSCPFMDDECSFADPSGSGINGKFLATSAFFFYVNNLHNVTNKAFSISPFDPIAFLDILNKVCLSNCAQASKWPEKTLPQRVCFNAMYAYSLLTDIYKLPIDSLRQTDFTLKVKGVAVGW…	0.71	1.11
	A10	98	EZ760460	contig09564:202:1650:1|similar to Acetolactate synthase-like protein (Q6NV04)|Evalue: 8e-117	376	53467	5	19.9	483	8.96	MATDNKLSSDCCSCTLLFIGTLAVCVVYYASRMMRRWLTIQKWSKIIYSGLFQKFDPNQXEHGGDLVASVLKAHGIPYVFCLSGGHISPILTSCEKSGIRIIDTRHEVNAVFAADAVSRLSGKIGVAAVTAGPGVTNTVTAMKNAQMAQSPLLLIGGAAAFLLKNRGALQDIEQLSVFSSICKKTYSVCRMQEIAPMLRDAIKTAQSGTPGPVFIEIPLDILYPFKVVTDALLKTGGGKKPRGLVARFSHWLQQTYLKGTFSGDFKSVDYSPLPVTRTLVSESVVDSVAELVMKSRSPMILVGSQCTLAPTPVSELRTALESLRIPCSLSGMARGLLGRHCSTQIRQKRREAIQQSDLIIMAGTVADFRLNYGADFRRGKTIISINRDLELAKLNTDIL…	0.35
	A13	84	EZ760618	contig11165:202:1374:1|similar to Cystathionine beta-synthase (P32232)|Evalue: 1e-132	376	43318	7	29.7	390	6.21	MSTSDTRKGPNDHCPVPQPPVWAPPNCPLLCTWTATTGSDQCPHNRVVPRSKPKIMDNILDNIGNTPMVRINRIGKSSGLQCELLAKCEFFNSGGSVKDRIAKRMIEEAERQGYLKPGDTIIEPTSGNTGIGLALAAVVKGYRCIIVLPEKMSTEKVDVLKALGAEIVRTPTAAAWDTAESHIGVAKKLNSEIPNSVILDQYRNIYNPMAHYDSTAQEIIDQCDGRLDMVVVSAGTGGTVTGIGRRLREHFGPQLQIVAVDPVGSILAMPEELNKLESTDAAFYEVEGIGYDFIPTVLDRQVVDTWIKTRDLDSLHMARRLIREEGLLCGGSSGATMFAACEAAKSLSESQRCVVVLADGVRNYMSKFLNNDWMKQRKFLKDHESVDAKS	0.67
	A8, 9	89	EZ760633	contig11268:1:905:3|similar to Peroxidasin (Q9VZZ4)|Evalue: 6e-41	376	34082	6 (5)	26.7	300	5.3	GEFLPVLIGERIAMDERNGVRLANGVWHGYNPEVNPGTWVEMSTAAYRLHTIVQNWLPLKRTVQEDFKPLHEYFFSPYYCYEPGALDNLAEGLCHENVQAFDNQVTTELAGRLFQAADEPFGLDLVALNLQRGRDHGLATYNDVREFCGLPRAKSFKDFEDTMSPKSIASLAKVYRHVDDVDFFMGGVSENPVNRGDGLVGPVVACIITGQFRDWRAGDRYWYENPGQFSERELKEIGRASFSGIICDNTNIKKLQPLVFVDAVDKLNPRMPCSQIPRMNLQVFLDGLPAHGAQPASHXX	0.75	0.85
	A10	99	EZ760766	contig12607:150:967:3|similar to Inactive testicular serine protease 1 (O70169)|Evalue: 5e-14	375	29871	10 (8)	36.4	272	6.85	MAHSWLTLLLTLSTSYAIQAASPGTPGCTCGVKGTAKFATPALAAAAATTTYDLISGMNVSTPGEWCWQASVENEIGNVICSATLIDPFYAITPAQCISGRSAHSTFIRVGAYDLSQISAGTSQLIPVDTLTVHSQYVNIQKRTDYNIGLIKFSRAIDCTLPHVCLACLPSGDSAVNTNAAASTCVATTWNVRYTRNQGPEVQRPLRERTVQILDKQTCSAQINTEKTIQPFALSNTKLCVREMVNDTKCMGDLGDPLVCNINGRYEITGLN	1.33
	A15, 16	56	EZ761250	contig18220:95:1021:2|similar to Succinate dehydrogenase [ubiquinone] iron-sulfur subunit, mitochondrial (P21914)|Evalue: 1e-111	374	35451	10 (7)	28.6	308	9.06	MALMAAESAVHRVLLLRPATLISRTAFQQSTSAATKREEVKPPPTLKTIDTQSSAKRVKKFSVYRYDPESGANTKPRMDTYEVDLNQCGPMVLDALIKIKNEMDPTLTFRRSCREGICGSCSMNIGGGNTLACIAKIDTDTSKTTKIYPLPHMYVVKDLVPDMTNFYVQYRTIQPYLKRKDESRVGKEQHLQSIEDRRKLDGLYECILCACCSTSCPSYWWNSEKYLGPAVLMQAYRWIIDSRDEATEERLNALKDPFSLYRCHTIMNCTKTCPKHLNPAKAIAEIKKHLAGLTKKENIPISASTATA	1.24	1.67
	A19, 18	41	EZ761163	contig17820:1129:1686:1|similar to Ras-related protein Rap-1b (Q5RDM6)|Evalue: 3e-82	374	21235	7 (6)	36.8	185	6.37	MREYKLVVLGSGGVGKSALTVQFVQGIFVEKYDPTIEDSYRKQVEVDGQQCMLEILDTAGTEQFTAMRDLYMKNGQGFVLVYSITAQSTFNDLQDIREQILRVKDTDDVPMILVGNKCDLEEERVVGKDQGMSLARSFNNCAFLESSAKAKINVNEIFYDLVRQINRKSPDMKKQKPKKKNCQLL	1.42	1.58
	A19, 18-21	42	EZ762467	contig24216:1:620:3|similar to Peptidyl-prolyl cis-trans isomerase (P25007)|Evalue: 1e-75	373	22835	12 (7)	41.5	205	7.15	FTLHLIFSEVSSVPDTRLCRFCSVFFVHFDTSANMTTTRVFMDITAGGQPMGRIVMELRNDVVPRTAENFRQLCTGEKGFGYKGSSFHRIIPQFMCQGGDFTNHNGTGGKSIYGNKFEDENFKLKHTGPGVLSMANAGPNTNGSQFFLCTVKTEWLDGKHVVFGQVTEGLDIVKKMEALGSQSGKTSKPVVIADCGQLXXEDSGY	1.99	3.18
	A15, 4, 5 14	58	EZ760982	contig16668:1:921:1|similar to Epoxide hydrolase 4 (Q8IUS5)|Evalue: 4e-68	373	35373	9 (7)	31.7	306	7.3	QVKSRTPPSALIDNSYGEHGFLKLKNGQRIHYVANGSSNSPLMLFVHGFPEFWYTWRYQMQYFKRNYRVVAIDNRGYGDSDKPSKVTDYAISKLSEDLKLVIEELGYETCTLVAHDWGGLIAWDFANTYGHMLDHLIIMNAPHPGALKYLDASNMLKQFIKSWYIFAFQIPFLPEFLWRSNDLEMLEGAFTKPPIGLTLRQATQDEVDAYKYAFRAPNAFNGPINYYRNLFHPNREERKWGMLAMPVLVIWGTADKAISTELASLSGRYANDFTHKLIKGASHWVQQDAPEQVNKAMEEYLISREK	1.05	1.88
	A15, 14	59	EZ762880	contig25787:1:681:1|similar to Aldo-keto reductase family 1 member C1 homolog (Q95JH7)|Evalue: 2e-45	372	26358	11 (6)	31	226	6.32	VREGLQKSLKNLQLDYIDLYLIHHPMGRPYSGDILLPTDEKGNYLFEAHDHVLIWKELEKAVDEGLVKSIGISNFNSQQIQYILDNCRIKPANHQVECHLYFQQKPMFDFCKKNGITFCAFSPLGSPNNEKFLEQLNALQDSTVAKIAAAHKKSPAQILLRHLVERERVVVPKSVNANRIKENFDIFDFDMSEEELKSLDALDRNHRCFTLNSAKVSSEYPWNIPF	1.31	1.44
	A11, 24-16	108	EZ759195	contig01625:1:1375:2|similar to Elongation factor 1-alpha (P41752)|Evalue: 0.0	372	50376	23 (8)	20.8	457	8.51	NENEMGKDKSNINIVVVGHVDSGKSTTTGHLIYKLGGIDKRTIEKYEKEANDMGKGSFKYAWILDNLKAERERGITINITLNKFETSAFKVTVIDAPGHRDFIKNMITGTSQADAAILSISAAQGEFEAGVSDEGQTLQHVLLAYTLGVRQLIIAVNKMDTVQWSQDRYDEIASEMKKHIKKIGFDPAATPIIPLSGWHGDNMLEGSTNMPWYKGCEVTRKSGTKKCVTLLDAIDSLDEPVRLSDKPLRLPIQDVYKIGGIGTVPVGRIETGILKAGTVVNFAPSEVTAEVKSVEMHHQQLDQGNTGDNVGFNVKNVSVKDIRRGFVASDTKDDPAKETANFTAQVIVMNHPGQIRAGYTPVVDCHTAHIACKFDTLITKLDRRSGKILEENPQFVKSG…	0.77	0.98
	A12, 11	100	EZ759769	contig04724:221:1534:2|similar to Alpha-N-acetylgalactosaminidase (Q90744)|Evalue: 1e-120	372	50049	9 (7)	19.9	437	5.27	MTGLAILILALIGAHYSDALNNGLALTPPMGWLAWERFRCNVDCKNDPKYCISERLFMEMAEKMVSDGYAAAGYEYVILDDCWMDKKRDAKGHLQXDPDRFPHGIKYLSDFIHSKGLKFGIYEDIGTLTCGGYPGIQDHEEEDMKLFASWDVDYVKLDGCYRDSKDFDKAYPMVGKYMNKTGRPMVYSCSWPAYLTGDPNTTVPWEKIAENCNLWRNYDDIQDSYDSVTEIVKWFAANQDELIPVAGPGNWNDPDMLLIGNFGLSKDQAKGQMAIWAMLAAPLIMSNDLRKMTPTNRKILLNRDVIEVNQDKLGIQGKQILSSDKNSGVEVWTRPVEPISESGNKTDYSYAIVLWNKRDDGMPYAVSKALSFYGLNSSDGYFVRDLYSKRDYGLMMSED…	0.67	0.96
	A14, 14-19	69	EZ761140	contig17716:435:1397:3|similar to Carbonic anhydrase 2 (Q8UWA5)|Evalue: 5e-50	371	37018	7	24.7	320	6.46	MALQQVQQQPTEAQTVVRRVKPEANNYLQIRMVKQPARRITVHDPADAHRLYDNAWIEGPLTFRDRLSQQPEPTRQSPIDIRNEDCIFNEKFCEKPLTIHYPFALSDVCSLCNTGSTWKVLVQDEGFTVSGGPLDGQYQLDQFHAHWGSTNIVGSEHLVDGLQYASEIHFVHWNKNKYAQFEEALVRNDGLAVIGVLLKVGKEHPELKKLTDLMKSVEFAEKSVCLTNVALQLTNLLPSDISEYWTYDGSLTTPPYNESVIWIVLRKPIEVSAEQLKTFRSLYLVKEGDEVPCDGYRGHLVHNYRPVQRHTRVKVQKSFK	0.82	2.65
	A12, 11-13	101	EZ763323	contig28279:1:702:1|similar to Plasma alpha-L-fucosidase (Q6AYS4)|Evalue: 2e-52	371	26156	10 (7)	29.2	233	7.05	VRDHVVVNDRWSNDSPCKHGGYWTCDDEYIPPQLLPRKWENCFKIDRHSWGYRRNINIGDIRSTQELIATLVKTVSLGGNLLLNVGPTSDGVIAPIFQERLLDIGNWLKINGEAIYETKPWKSQNDTVTPNVWYTAKGYTVYATILDSAILDSVTLGSVIVSDTTKVTILGYGGELKWTVTPDAHIVLMLPXEGITPKVADWGLVLKLEGLQSTEKKQSKKSSRPLPAMQAVL	1.31	2.06
	A8	91	EZ762974	contig26220:64:2079:1|similar to ADP-ribosylation factor-binding protein GGA1 (Q8R0H9)|Evalue: 9e-69	371	73504	11 (7)	11.9	671	5.51	MEHQCENLVYRLTDPTLTTRAKEAEDALFQLVNGETAVAAHCLRLLAHRLHSPCEREALNSLALLESLVKRSTRLFHSEVGKFRFLNELIKCVSPKYLGEKTTEPVKTKTVELLYGWTLSMKYEPKVLEAYQMLKQQGIVKDDPVIPEANPTPLKPAPPRPKNPIIDDEEKAKLLRRLLQSKDATDMAAANRLIKNMVKEDDQRMEKIIRRHADITQIQENARLLSDMLKSFAAAPQASSVSEREVMRQLYDSCEQQRPRVFQLAAEIAESTSTIKEDDDGPDGPSLADVLQASDELTEVIQGYRANNLLNETFPDKTQAKSGTGDLVNIEPTLSTNVPPQTVATNLLHEPSNSGSSSAMAKTDSTALLDEVFGTVLQITAADASTAIPNSLVNSVLFE…	0.36
	A15, 14	60	EZ760157	contig07229:1874:2555:2|similar to Prostaglandin-E(2) 9-reductase (P80508)|Evalue: 1e-30	371	26147	8 (7)	39.4	226	5.62	VREGLQKSLKDLQLDYIDLYLIHLPTGMPFSGENTFPTDDKGNALFEPTDHVTIWKELEKAIDEGLVKSIGLSNFNSEQIQNILDHCRIKPANHQVECHLYFQQKPLFEFCKKNGITMCAYSPLGSPNTGFNVQQLNDLQDPTVAKIAAAHKKSAAQILLRHLVERGWVVIPKSANRDRIRENFEIFDFDISEEELKTLDTLDRNHRCFGQDFGKSSPEYPFNIPF	1.31	1.44
	A12	102	EZ759079	contig00980:1:671:3|similar to Endoplasmic reticulum resident protein ERp44 (Q9BS26)|Evalue: 4e-55	371	25437	9 (8)	50	222	5.27	VTFREVVGSNTNEDVYNNNLEDINALNAWIYERCVPLVREITFENAEELTEEGLPFLILFHKASDLTSVETYKDEIRKQLMGDRSTINFLMADGEKFSHPLQHLGKSQDDLPVIAIDSFRHMYLFPDFKHISEPGKLKGFVDDLHSGRLHRVFHYGYDPNEVQTTPQTNEIPLVNVKTGEHIPVLPTDGVKKPMGVTPPESTFRKLAPSRNRYTLLGEKDEL	1.68
	A16	71	EZ760279	contig08166:1:810:1|similar to Methylglutaconyl-CoA hydratase, mitochondrial (Q13825)|Evalue: 4e-76	370	29151	10 (8)	32.7	269	9.03	TESNDHFLLERLDGKRTGIVLFSLNRPAARNALSQRLAKQFREAIEQMRTDADARVIILRSTSANIFCAGADLKERAKMAERDVAPMVASWRAMVESFANLPQPTIAAIDGAALGGGLEVSLGCDIRVASDSAKMGLVETSLGIIPGAGGTQFLSRLIGAAAAKEMVFSARIVDGTEAKALGIVSHVMPQNSEGNAAFLKTLEIAERILKNGPIAVRMAKIAINRGVQVDLNTGLSIEERCYERVTQSKDRLEGLMAFKEKRSPQFKGE	1.37
	A6, 4-19	44	EZ761554	contig19607:1:514:2|No Annotation	370	19460	19 (7)	50.3	171	9.78	QQVLPKLTGEGYKMENRRIAMPRFDFSMPTVFGFPLYVRSTFPIVASMEGKLKVQLTPKPQNIDFSLLQHMPHTVKVDADFTTKFDGTHLCTFGLMMPFIKAGAGVTHKISVEMPVKGSLMFKPAENLTRFIWDMPEKPTELVRVETYPLTYLRKATLKKASFLLVRSAVS	4.8	34.15
	A13, 12-14	87	EZ762985	contig26273:258:1214:3|similar to Sodium/potassium-transporting ATPase subunit beta (P25169)|Evalue: 1e-52	369	36176	14 (7)	24.8	318	5.77	MASGPTETDLFVRGQEKVQPSKWQAFRTFLYNPKEGTVLGRTGKSWLQITIFYLIFYGVLAAFFSVLLVLFLQTLDDRAPKWKGAEGIIGSTPGMGFRPTPNDNGSTLIWLKKGGDRERADTGGYVQQLNDFLAPYDNQHASNNLTDCSEGTKPTDKQACRYDLSSLGPCNKARNYGYPNGQPCILIKLNKIYGWEPQEMTDENMKSEMNTALTSMYGNQRAAELQTSANSIVITCEGEDYVDREHIGPVRVHPSSIPAYYYPYLNQPEYPQPIAMLEFLNPKPGVLINVECRAWAGNIEYNRIDRQGAMKFELMVER	1.02	1.99
	A14, 13-15	71	EZ761184	contig17906:1:693:3|similar to Quinone oxidoreductase (Q6AYT0)|Evalue: 4e-30	369	24795	6 (5)	34.3	230	6.77	CRFSASLPTQFPHTFSYPHLFFIDRKSKMMQAIRGHILGEPRTLIDQFVTEVPVPEPQQNQLLIRVAAVGLNPYEALSAAGVWERVPFAAGGDAAGIVEKTGAGVTDFQVGQRVYTCDLSYGGHYGELMVVDVAHCFPLPDNLSFIEGAALPCSYLTAMRALTFCGKAQKGQTVLIHGASGGLGLAAAQIACAMGLNVLGTAGSDAGLTLIQGHGVTRAFNHKSKDYTKE	0.88	1.31
	A16, 15-17, 20, 21	72	EZ763083	contig26840:156:980:3|similar to Vesicle-associated membrane protein-associated protein B (Q9Z269)|Evalue: 6e-40	368	29633	15 (7)	30.3	274	8.81	MSDTASEAKVNAGAPQVLQISPKGSLTFKGPSSLSAQANITLTNPTKRAVAYKVKTTAPKRYCVRPNGGILNGADNVNIHIIYQPGEAMDPQERQRHKFLVQALFVEGDANAQNLEFLWRDARKENIMESKIRCVFEDTDEAVLPSAPQLHATTGADMDSSMEGAVQAATATKSGITNQELELRRIGEDYRRAQDEIANLRDENKRLRDEGVRLRKSITSTATSSSGTAASGNAMKTMAGHGATGLMADLTKVTVLGVLAAMFIFGILIGKVLF	1.61	2.6
	A12	105	EZ759737	contig04515:1:928:3|similar to Zinc metalloproteinase nas-4 (P55112)|Evalue: 8e-38	368	34830	7 (6)	37	308	5.23	DTKDSGCKPDNLEDPALADPDGDKSEGLPAHEEDEGVTKIEGDIVGIDLSGSEAELATQSNALTDESKRWPTKGDIIEVPYTFWPGVKPELQKTVRAAMNGIQDNTCIRFVKRSSQKDYIKITSALSGCWSNVGKTGGEQRISLQTPGCGSYGTAQHELMHALGLFHEQSRTDRDQYVTINWDNIKPDDAKNFKSYSSAEVTHFKQPYDFASIMHYGPTYFAINEKVPTIKPVEKYKAWYKKLGQREYLSDIDIEKLNLMYKCGERKRAWPGWDFNMGADVFVIESNNGIECRAKCKETEGCGAVVIA	0.89
	A9, 8-10	99	EZ762326	contig23659:1448:2056:2|unnamed protein product [Tetraodon nigroviridis] (GI_47195684)|Evalue: 7e-11	367	23460	6	33.7	202	5.03	MMKFHNEMKEFMGKMQLLNAQEINYTKILELIREGLRILSQIEESWSTLVRFFTLISDQTSFMMDQVTQPFITFATESVQPSFDDEDRNFLKKLLVDQSAQLIREAYTLHTITSTYVDISGRFIMDPMASLGRLLTFTTDAERQSARNELFAKSKAADAEIENIANAKRDEYKRLMDAEEEKVKKYARTVETTYGDMMNLLA	1.23	1.86
	A9, 10	100	EZ761209	contig18041:1:821:1|similar to Bifunctional 3~-phosphoadenosine 5~-phosphosulfate synthetase 2 (O88428)|Evalue: 1e-101	367	31002	6	32.6	273	6.35	NGDRNIFKQDHHVTRHTRGAIVGQREGFRGCTIWLTGFSGAGKSTIAFVLEEYLCSKGIPAYTLDGDNLRHGLNKDLGFSEADRVENIRRVAEVAKIIADSGQVCITSFISPFVKDRENARAVHKRDGLPFFEVFIDAPLEVCEKRDVKGLYKKARAGQLKGFTGIDSVYEEPKKPELVLKTAEYNVGESIEQVLDMLRTHDIVPSVRAHELFIPHEFKSAALREADTLQSVDITVLDLQWVQVLSEGWASPLTGFMREKEYVECQHFKRLGT	0.84	1.5
	A9, 10	101	EZ762130	contig22885:265:2031:1|similar to Syntaxin-binding protein 1 (P61765)|Evalue: 0.0	367	67885	8	17.3	588	6.71	MSLKSIVGQKILNDVLRTIKEKGKWKVLVVDQLSMRMISACVKMHDIMNEGITIVEDLHKRREPLPNMEAVYLITPTEKSINALMKDFENPLNHQYKAAHIFFTEACPDDLFALLCKSSASKFIKNLKEVNLAFLPYESQIFSLDCPEAFQYYYNPQKSSGRGGNLERLAEQIATLCASLGEYPAIRYRNDLKXXVELAQLIHQKLEAYKADDPTMGEGIDKTRSQLVILDRAFDCVTPLLHELTLQAMAYDLLPIENDVYKYETSGAQDVREKEILLDENDDIWVTYRHHHIAKVSKSVTAGLKKFMESHSQKNTDKMNIKDLSSMIKHMPQYQKELNKYSTHIHLAEDCMKQYETRKTERLCRAEQDLAMGETPDGEKVKDPMRAIVPILLDQNYSN…	0.46	0.61
	A18, 17-19	46	EZ762909	contig25932:359:1012:2|similar to Maleylacetoacetate isomerase (Q9WVL0)|Evalue: 4e-65	367	25344	8 (6)	40.6	217	6.89	MASTPLLHSYFRSSCSWRVRFVLSYKGIAYETKAVNLLNGEQKSEEYKKINALCQVPALEIDGLLMTQSVSIMEYLEETHPERPLLPTKPRDRQRVRQIVEVICSSIQPLQNLSVLNQYSDDQQKKSEWAAHFIAKGFDSLEMLLREWSGKYCVGDEVSLADACLPAQVYNAKRFKVDMSLYPTIARINEEISKLDAYKMSHPCKQPDCPSELRNQY	1.38	1.51
	A12	106	EZ762455	contig24196:132:1388:3|similar to Actin-related protein 3 (P32392)|Evalue: 0.0	367	47797	9 (7)	28.7	418	5.43	MAGRMPACVIDCGTGYTKLGYAGNTEPQFIIPSAIAIKETAKVGDQSQRRLGRGVEDLDFFIGDEALEQSSYATKWPIRHGIVEDWDLMERFYEQCIFKYLRCEPEDHYFFLTEPPLNTPENREYTAEIMFETFNVPGLYIAVQAVLALAASWLSRPVGERTLTGVVIDSGDGVTHVIPVAEGYVIGSCIKHIPIAGRDITHFIQSLLRERETTIPPEQSMETAKAIKEKFAYICPDVAKEFAKYDSEPAKWIKQYEGINNISKKVFSVDVGYERFLGPEVFFHPEFCNADFTTPISEVVDDVIQNCPIDVRRPLYKNIVLSGGSTMFKDFSKRVQRDIKRNVDARLKTSEQLSGGRITPKPMDVQVISHQMQRYAVWFGGSMLASTPEFYQVCHTKAD…	0.7
	A14, 11-16, 18	72	EZ761388	contig18840:102:891:3|similar to Transforming growth factor-beta-induced protein ig-h3 (Q15582)|Evalue: 4e-09	366	30016	17 (7)	24	263	5.53	MRAIFLILAVIPLISCYEGLTKGRPFPDSWYDGTYVDGEESNSVHEFHGKKNVFEKLIGTDEQEYINTNNRMKNYGDMDVLDWAKSLGATLYVKAAKLSGFEEEVRTTRPITAFVPTNKAFAKLPKTYLAYFAMHPDRLRKTLEYHTLNEGRNTSTLTDEENIPTLFRNLTARFNIYPHPGRENISTIMGARLSDKVDVRASNGEVHLLDDVILHFQIVDMYDAISKCPRFRTLFTALVVADLDDGLHEEKPGTLFAPTEEAF	1.87	5.91
	A9	102	EZ762764	contig25321:1:771:1|similar to Phosphoenolpyruvate carboxykinase [GTP], mitochondrial (Q8BH04)|Evalue: 4e-94	365	29844	13 (8)	37.5	256	5.73	FWWEGLEKEIPVEEVTDWRGKKWAPGSKGPAAHPNSRFCAPAEQCPVIDPKWEDPEGVPISAIIFGGRRPEGVPLIYESFNWEHGVFVGSSMRSEATAAAEHKGKDMMHDPFAMRPFFGYNFGDYLRHWLSFGQHKNYKLPRIYHVNWFRKDSSGKFIWPGFGENCRVLDWIVRRCNGEDAAIETPIGYVPKPGSLNIDGLKGDIDMQELFRIPTDFWLKETEAIDKFYKEQVGEDIPKEMEQQLSQLRQRLEKQV	1.59
	A11, 10, 16	110	EZ761265	contig18321:1:789:3|similar to Chymotrypsin-like elastase family member 2A (P08419)|Evalue: 3e-23	365	29034	9 (6)	29.4	262	5.56	AADDFKGIQVDTIDFDTENTYDCVEFFEADGSSAGKFCGSSGPSKLRLSSSAITFRFKTDSSVTRRGWVLRFSRSLCRKGEGNCPNHPAVCMPKNAWCDGIKDCPDAADEDCPDPGSCGKSAVKPNVRIVGGTEAVPNSWPWQAAMLSSSGSQLCGGTIVHPEWIMTAAHCCAAYSPQPSSYKFRIGAHAYAANEDGASTVTLSKVVMHPNYNSPVRYANDFCLVKTSERMQFTNKVQPACMEGETVPEDSTVWITGWGNTG	1.38	1.6
	A8, 4-8	92	EZ761234	contig18153:1:1867:2|similar to Coatomer subunit beta~ (Q5R664)|Evalue: 0.0	364	71140	9	17.2	622	5.29	LYNGQVHIWNYETQTMVKTFEVCDLPVRNSKFCARKSWVITGSDDMQIRVFNYNTLERVHSFEAHSDYVRCIVVHPTQPFILTSSDDMTIKLWDWEKKWQCTQTFEGHTHYVMQIVINPKDNNTFASASLDRTIKVWQLGSTSPNFTLEGHEKGVNCVDYYYGGEKPYLISGADDKLVKIWDYQNKNCVQTLDGHTQNVSAVAFHPDLPIILTGSEDGTVRVWHANTYRLESTLNYGLERVWTICCMKGSNSVAMGYDEGSVVLKLGREEPAVSMDNSGKIIWAKHSEIQQANLKSISDAESKDGERLPLSVKDMGSCEIYPQTIAHSPNGRFVVVCGDGEYIIYTAMALRNKSFGGAQEFVWSQDSSGYAIRETASSIKLFQNFKESKTLKPDFSADG…	0.5	1.24
	A15, 14-16	62	EZ762427	contig24078:1:648:1|similar to Guanine nucleotide-binding protein subunit beta-2-like 1 (Q93134)|Evalue: 1e-68	364	24733	15 (7)	39.4	216	8.44	TKRRSAXLVTYRFSAELFIHSPTNLTXLLRIALHHIVSAFVKESHKMPEPSKPTEQLTLRSELIGHDGWVTQITTNVLYPDMLLSSSRDKTLIMWKLNREERNDEVPYGLPQKSLHGHGHFVSDVVLSSDGLYALSGSWDETLRLWDLTAGKTSRRFTGHTNDVLSVAFSADNRQIVSGSRDRTIKLWNTLAQCKYTITEDCHQDWVSCVRFSPSS	1.75	2.67
	A14, 19	73	EZ759550	contig03471:1:1293:1|similar to Reticulon-4-interacting protein 1, mitochondrial (Q0VC50)|Evalue: 3e-71	364	47840	8 (7)	17.4	430	9.24	EKVWFSTNNSTFFSVKKPSKQRVSIGHTTTVIAIPRLIMSLASLQRKWRLPNQLYTQISCSRLLHSNTMKAWQIHSFNDIAAMTLEEHVRIPPINDPSDVLVKIHAASVNPLDVRRMRGYGETAIQILRTLRQFPKLPHLNFFRRNDSTFPMGIGEDLSGVVVDCGKSVSKFRRGDEVYGFVLPSSRQGSFAEYATTPFWCLARKPSSLSHAEAASLPFVACTVWSALVLGGNLTARKAPNKRVLLIGAGGIGTFAVQYCAAIGANVTAICSKEAVSLMSELGASDVIDYEHENVESELSRRAPFDLIFKASGGDYDYAKKFLRKNYLSSYVTLNFPLVSNTDKYGNIAGLIKSGATFAGNYLSGLASGYHNIWGIFIPNARFLEEVARLVDDGLIRSV…	0.59	0.66
	A14	74	EZ758924	contig00142:113:1300:2|similar to Stomatin-like protein 2 (Q99JB2)|Evalue: 3e-115	362	43945	9 (7)	22.8	395	8.94	MTAVVETVIHQLLRVECSSLSSVRTLNRGMAANATQRLLAPYMKRAPLRIVSRRYASSTPINTVIKFVPQQEAWVIERMGKFNRVLEPGINVLIPFIDKVRYVQSLKEIAIEIPKQTAITNDSVSLSMDGVLFVRIVDAYKASYGVEDPEFAITQLAQTTMRSELGKIALDTVFRERESLNTNIVVAINNASASWGITCMRYEIRDIHLPPNVQDAMQMQVEAERKKRAAILESEGIREAEINVAEGRKIARILASEAWKSEQINQAEGEASAILTKAKAKAASLDVVALSLSGKDGADAASLTVAEQYIQAFSKLAKESNFVLLPHNTGDLSSSIAQAMTIYKSLSKHDSESELTRKLKKDTKDDVRELKDANSTRESENGKDSKKSRESKEWK	0.79
	A9, 4-12, 14	103	EZ761963	contig22109:1:1475:3|similar to Lysosome-associated membrane glycoprotein 1 (P05300)|Evalue: 7e-12	361	55272	10 (7)	16.9	490	4.84	PGAKWAVFEGGINCILADFQTTFLVNYILENGTSSQVAIQMPYAQTTVNTNRSTCFGGGRKPDEIQVMSLWWTAPAANPSAADKPYNYNVTLKFTTNDAKSEQTLHSVAFEYDLLNNANFPNSKATESKQRTAYNKSPIDLAPRDQAYRCFAELPIELFEDGQNAVTVKTSNMRIEAFHSSANSTFDREYVCQEDQGTTTYVPPVTSTLPPHTNTDLPVTYQNGTTCLRASFDLAVGLVYWKKDGTMGNGTDHKLNNNTISHESTCEYANDGELLAFTSSNPKFPDWKFMLTFYRDASYYWLRYVNVTYSLSAFSDANNTQFWTSNNDLGSRYLYASKEYTYKCGNRQVDLNIDSRSAVQLYVRFDDLKVQAFMNSNTNFNQTTDCTSSGPTSDVVPIA…	0.59	2.74
	A18, 17-19	47	EZ763325	contig28284:1:272:3|similar to Glutathione S-transferase (P30116)|Evalue: 2e-10	361	10701	15 (8)	76.4	89	4.97	QQCDMIEGALGDFRMGWGILMYMSQDFDKEKKQYEETVKKHYDMFSQFLGNKKYLLGNDIKYVDFILFDLLDNHQHFIPDVSKQVPESC	15.6	16.67
	A13, 14, 18	89	EZ762272	contig23468:180:962:3|similar to Mannose-1-phosphate guanyltransferase beta (Q6DBU5)|Evalue: 2e-95	360	29544	5	31.4	261	6	MGSDSEMKALILVGGFGTRLRPLTLYRPKPLVEFCNKPMLYHQLDALVEAGVTHIILAVSHQAEKLEAELGKYAEARHVKVTFSHEKEPMGTAGPLALAAEHLRGSEPFFVLNSDVICDFPFKEMIKFHKSHGREGTICVTTVQDPSKYGVVIFNKDSGKIDHFMEKPKTYVSDKINAGLYLFNPSILERIPLENYSIEKEVFPGMAHEEDLFAMVLKGFWMDVGQPKDYLTGMCLYLKFLSDQKSSELSEGTQFHGNVMV	0.71	1.35
	A18	49	EZ760768	contig12673:1050:1649:3|similar to Ras-related protein R-Ras2 (P62071)|Evalue: 5e-70	360	23242	7 (5)	28.6	199	6.17	MNDNRQTGQSQSYQVVVVGSGGVGKSAMTIQFIQSYFVDSYDPTIEDFYSKQCVIDDQVARLDILDTAGQEEFSAMREQYMRSGEGFLLVFSVTDRGSFEEIYKFYKQILRVKDRDEFPMLLVGNKSDLEHQRVVSRDEINQLAQQLKIPFLECSAKQRLNVDQAFYDLVRQIRQFQAHERPPLRPDNSGKKKKKCCVL	0.96
	A12	109	EZ760313	contig08405:145:1326:1|similar to Arylacetamide deacetylase (Q0P5B7)|Evalue: 4e-42	360	44568	9 (8)	28.5	393	8.59	MFPLKVVGGLTIIAIVFSYFYAPLPDGMYPEDRTPLRLIHASLQLSNAISRLVSVTGYDSALNVSRNLRDSSLLSLVMSADNVPEVIMDHKVFDGIPVTLFRKLSWSVKKRPVLLYFHGGGWAFKSSGAFDRLLKILVNRTTDAVVIAVDYRLAPEHPYPLPFDDCLKAVRFVQRNADKLSIDAERISVGGDSAGGNLAAAIALKLRDTKELKLKTQMLISPTLQFVSYRLNSFEDNDPYPILSKRHMIEYSLMYMNESHSLYNELRDNEHVSSAIMRSEQWQFLQKYQRFPQSHVKIDTKVATPLQKKITDPYLCPLMAKSLIGLPNTLIQAATFDVLLDDAMAYHDRLKTEGITSELQVFPGFHGAYVFFDTTRVGKEMVEKLVTFMEKNM	0.77
	A11, 10	113	EZ760715	contig11988:1:1216:2|similar to Zinc metalloproteinase nas-14 (Q19269)|Evalue: 3e-27	359	46234	6	17.8	404	8.4	SAESAVVRSTGPTTVKTKTCSPNSFDADRPETFPRTKSIDITPEQEKALNASLQQLNGTVFQGDLRGIDIERTKKDKKIHYLDANKKASANSDVTERWPNGRVTYYIYKNQFNDTQKKQIRDAMDLLSSVSFVRFVEWRSPDVHHLAIINTKTTCQSSYLGFRGAPQSLELGFFDPKPGKKDPQTCFIAPGTIVHELLHALGFGHEQTRLDRDDYIKINWPNIKPDMLGNFVAYAGSDNYGLPYDFKSIMHYDFNFFAVNPLSWTILPKDNNVTVKLQRLGGEELTRDDIKMINIMYPGCAILHEGVFRDLPRIYMINGTQIDEIKNNNLLSSSVTYGCTLTICDSTCLSGKCVSFTSSGRDVRQNITLMEDFGISWTGNPWVNPKSAKCICKPWNRNN…	0.51	0.74
	A19, 17-20	45	EZ761558	contig19640:110:598:2|similar to 40S ribosomal protein S11 (P62280)|Evalue: 3e-66	359	18776	11 (7)	44.4	162	10.59	MSGELGVAEQNERAFQKQPTIFLNKKRVLATATKVKRARYIKSVGLGFKTPREAIEGHYIDKKCPFTGAVLIRGRILTGVVQKMKMQRTIVIRRDYLKYFRKYNRYEKRHSNMSVHLSPCFRDVSVGDVVTVGECRPLSKTVRFNVLKVTKGAKTAKSFKKF	2.18	2.93
	A6, 5-12, 14, 17	47	EZ761031	contig17126:1:561:2|similar to Spectrin beta chain (Q00963)|Evalue: 9e-80	359	21539	7 (5)	34.9	186	8.73	AGYANVNVRNFTTSWRDGLAFNALIHRHRPDLIAYDKLARTNPHYNLNNAFNVAEQKLGLAKLLDAEDVAVEYPDEKSIITYVVTYYHYFSKIKADTVHGRRIGKIIDIAREADKEAQHYERLTSELLRWIQETIEALNDRRFANSLPGVQQQLAQFNTYRTVEKPPKFVEKGNLEIMLFALQSRL	1.76	7.21
	A6, 5-9	48	EZ760511	contig10062:1:1118:1|similar to Ubiquitin-like modifier-activating enzyme 1 (Q02053)|Evalue: 7e-132	358	42060	6	25	372	5.6	GVVTAADEARHGFEDGDHVTFSEVQGMDELNHSPPLKIKYLGPFSFSIGDTSKLSEYKRGGIATQVKMAKHVHFKSFRESLQSPEFIDVDLAKWGRSQLLHLGFMALNEFCSKRNGLPRPHNREDADAFVELCHQLNERQSQKIEKLDEDVLXVYLAMTARGDLPPMQSVIGSIVAQEVMKGCSGKFNPIFQYLYFDALECLPLSAVDESDAQPLDSRYDGQIQVFGKDFVEKLQNSRWFVVGAGAIGCELLKNFSMMGLSCGPNGMIYVTDMDAIEKSNLNRQFLFRPHDVQKLKADVAAAAVKVMNPSVHITSHQNRVGPDTERIYDDSFFENLDGVANALDNVDARMYMDRRCVFYRKPLLESGTLGSK	0.57	1.22
	A13	90	EZ762221	contig23305:1:808:3|similar to Protein arginine N-methyltransferase 1 (Q99873)|Evalue: 5e-92	358	31292	8 (6)	28.7	268	5.37	GPPTSATDKDMTSKDYYFDSYAHFGIHEEMLKDQVRTLAYRDSLIYNEHLIRDKVVLDVGCGTGILSMFAAKAGAKKVYAVDCSNIVHSARQIIKENGFENVITVIQGKVEELELPDGCEKVDVIVSEWMGYCLLYEAMIDTIIFARDKWLSPNGVLLPDRATMFICGIEDRDYKEDKINWWRSVYGFNMSHIRNQALQEPLVDVVDSRQIVTDHCMLTTIDMYKVSVADKVFTVPFELHCRRDDYIHALVVWFCVDFSKCHKLIRLS	1.03
	A15, 9, 15-19	64	EZ760925	contig15825:1:1734:1|similar to Beta-hexosaminidase subunit alpha (Q0V8R6)|Evalue: 3e-149	358	67036	8 (7)	13.9	577	5.9	TFTSRFTSQLHFAKMAAIIVLLFLCTISLVYSGQTHHSLTWDQLQSIRERVSATADSATVWPKPQQQKTKENVLLLVDFRFTTKGSSCDIVEEAIQRYYRVIFGEHKHLLWNATVEKHSRLAKAHSLSTLYVQLLSPCKDRDIPDVDMDEHYEIRLRSKKSASLIVGNTVWGVIRALETFSQIVWRTDDGGLAVNETIITDFPRFAHRGLLLDTSRHFISKQVIMHNLDAMAMNKYNVFHWHIVDDQSFPYQSRTFPDLSTLGAWEPYDHVYSQEDVSEVIEFARLRGIRVIAEFDTPGHALSWGYALNKLLTPCFKGSTPDGSYGPINPILNSTYDTLEQLFSEILDVFPDTYLHLGGDEVDFTCWKSNPDISKFMKKMGFADDYAKLEEYYIQTLID…	0.4	1.3
	A11	115	EZ760691	contig11796:151:1318:1|similar to RAC serine/threonine-protein kinase (Q8INB9)|Evalue: 1e-123	357	45615	8	19.3	389	8.05	MWFPVTEQXRVTDKRCQELSRIWXXTASDTDRPTYDSHSTAFHTLDTHTMNIESTSNLSQIRRMKEGWLLKRGEHIKNWRPRYFILFEDGSLIGFKARPEVDLNNPLNSFTVKGCQIMKTDKPKPNTFLIRGLQLTTVIERMFNAENDKERDDWCRNIQAIAENLKFEEALVPKEDPQQNLPQLTRTPTIGTSNKPHKHGRKITLEDFEFIKVLGKGTFGKVILCREKSTSTLYAIKILKKEVIIQKDEVAHTLTENRVLQNAKHPFITQLKYSFQTNDRLCFVMEYVNGGELFFHLSRERIFSEDKTRFYGAEILSAIGYLHELGIVYRDLKLENLLLDKDGHIKIADFGLCKEYITYGARTKTFCGTPEYLAPEVLDDNDYGRAVDW	0.75
	A15, 14	65	EZ759591	contig03642:1:522:1|No Annotation	357	19432	6 (5)	37.6	173	7.71	APTRVRVGTTAIRLKPPPTMSTKPLPTYPPTTPLPPPSTPPPVYSPKEGWTTLCEEEARILEPGSTEEECFTSQPVTLRYWQPYRALRNIRCLNGTGSALSEDNGSRCSAVFAGATCVQKYQQFIVLSSSGPSSSGWACIRLMTGCECSLRPRSALNWNDFEQESDLKDFLAS	1.22	1.84
	A8, 9	93	EZ759655	contig03998:1:1060:2|No Annotation	357	39030	7 (6)	23	352	9.06	KVNQCPPGVGVDRFTGRGGCTMPLSVRECIIPSNFIDNDYHFNFRTRNGQMTEIKCGGDVTPVQSNVEPTVFYVCKDDALSGKIIREYACDEARELIAVYEQCIPIVRAPQIMAIENTRLQRLKELQQQQRRNEKPENAMFTIPFGGSNQLPVSRDFSNQPSASQLTNSFKTPQTSNQFMSTQVRNPSIVQLPATVFPNSPSNSQFSGGSTSGQFGAVPTNSFSSGQTSGQFFSPQVSSRTVVQNPFVSVQTPVQFSQPQVTSGQQATGRSFSEPLQFSNAQAVIPFGRSFSPQNQMPSQSLTSSFTNPQVTSGQFARVGRDLTATGESTNAQPFNPFHNPAMIEAFKRFRA	0.63	0.71
	A8	94	EZ760336	contig08576:1:1802:3|similar to Phospholipase A-2-activating protein (Q6GM65)|Evalue: 1e-102	356	65934	7	18.5	600	5.52	MVNMLLRQVLRTKHTIWSKNGHHLRTLIGHTDVVRALICPKVNELLSCSNDATIRRWNVMDGTCLFSYFGHKNYIYSMALLPQNMFVSCGEDRSVCVWAEATQSPLQTIATPVLSVWAVATFQNSDIAAGGSDGTIMIFTADSRRMASEADQRSFEETVAASTHSTTDVMEGVKTEDLPSEAALIEPGTKEGQMKIIRRSNQVEVYNWSASENEWKKIGDVVGSSGGTTKTSGKVLYQGKEYDYVFSVDFDENRPAIKLPYNISQDPWIVAQKFLEDNDLPQAYLEQVASFITKNAPNAGQNAPISGYADPFTGSGRYVPGGPSASTAAGIGPFLQAVEGXYAFGRSTDAPTAAAVDPFTGASSYKSAAATAASVPSTPNQFYPQRTYLSFAIANLSAV…	0.41
	A6, 7, 9	49	EZ762747	contig25243:1:1182:1|similar to Ubiquitin-like modifier-activating enzyme 1 (Q02053)|Evalue: 4e-137	356	45206	9 (7)	24.2	393	5.74	QYLDEAKFVEHTLKQPGTQPFETFDSLRKALIDEKPKNLEDCVAWARRQFDEYFYNQIVQLLFNFPADYETSSGAAFWSGPKRCPHPLKFDANNSTHLDFVMSSACLRAQMYGLPTNALSRDEIRNVAAALRVPEFVPKSGVKIAANDQEAMQNSESYGDNRRLDELITSLPSVESLKGFRMNALEFEKDDDSNYHMDFIVATSNLRAENYDIAPADRHKSKLIAGKIIPAIATTTSLVVGLVGLELYKLTQGHRDVSKYKNSFVNLALPYFGLSEPMPAPKNKYGEIEWTLWDRFEVDGDITLXKNFSIIFKEKHQLEITMLSQGVSMLYSFFIPRDKKEERLDLKMTELVKKISKKRIEPHVRSLVFEICCNNLDGDDVEVPYVKYNLPSN	0.76	0.83
	A18, 14-19	51	EZ762374	contig23830:1096:1332:1|No Annotation	355	8876	13 (5)	64.1	78	8.91	NVNLRVRAVSSVIPVNAEMEYFDCPFKVRLDDIASSASDAKFGQTIECKSKYQPGKIRLMVRQRAYEIPESKCAAVAV	6.33	14.79
	A19, 18-20	46	EZ762887	contig25813:1:416:2|similar to ATP synthase subunit O, mitochondrial (Q2EN81)|Evalue: 8e-25	355	15794	14 (7)	52.2	138	9.26	ELEKVEEDLKKMASLLQTNPRFSEALKNPVASRQEKHHLLIQLAEANQWSKLTFNMLDTMAEHRRMGFLPQVLRQFATLMSAHRDELNVTVTTARPLDEKQQKDLQSALQKFIKKGQKTMIEMKVDAQIMGGMVVSIG	4.78	5.79
	A18, 17-19	52	EZ759013	contig00616:1:522:1|similar to Proteasome subunit alpha type-2 (O73672)|Evalue: 1e-65	354	19524	10 (5)	46.2	173	5.44	KVEQVSGNIGMVYSGMGPDYRLLVKRARKIAQEYKLTYQENIPVVQLVQRVAAVMQEFTQSGGVRPFGVSLLIGSWDDERPYLFQVDPSGAYFAWKATAMGKSHIQCEDVLREXRFADDMVIDDAVHTALLTLKENFDGQMTDNNIEVGIATAKDGFRLLSNREIKDYLKSVL	3.18	3.72
	A18, 17-19	53	EZ762430	contig24094:119:742:2|No Annotation	354	24175	15 (7)	39.1	207	8.34	MQITILCVLLACVYVAYAQNSCSYEGTCRYDSDCCSSKCLNRKCVKGRHGCVSEPGECTSDNECCSKNCRNYRCRGTDTTNTNSQCKTVGGCSLDRECCSGDCRNYQCRGGTGMSHNSGRGESGRGREESSRRDEVLGGRGSSGGRGSSGRNNCVSYGDCRLDSECCSGNCHNYVCQYGDGCTTSGECRRDGLCCSKQCRNGRCRVN	2.21	2.98
	A9, 8	104	EZ760158	contig07237:1:771:1|similar to Leucine-rich repeat-containing protein 55 (Q6ZSA7)|Evalue: 4e-12	354	29240	7 (6)	34	256	5.16	RMRLQNIPDDFFNYENELKHVDLSWNRFSEINGPFFRNLKDIETLDLSHNALVRVPESLDALQRIQRIDLSDNQLASFPSRLVEIYMSPGFPLESLKLNNNLWQCDCGVSSLAKWLQPSLVGNDRGFRIVCVGSANHTCPVCKAPSNMQNTPMNYLTSDVIENCGEDAKAVQGSTANVDIIIAVVVCIIVLIIALLLLMMWYRNRLISYRTNEEKRKDNLDNVYGGEDAVFEDPITAKTPISGSAIPQRNVPQSNV	0.91	1.29
	A14, 13, 17	77	EZ761279	contig18403:1:742:2|similar to Eukaryotic translation initiation factor 3 subunit H (A7SA47)|Evalue: 4e-56	353	28247	7	40.2	246	5.42	VFGSFLNREVFELQYDYQSNVEESVVLIYDPVRTAQGLLTFKAYRLGNDVMEMVEREGQEFTXESLRKSKVSFESMFEEVPVQIKNSHLMNCMLCELDLIAPSPNKRPFLDLSTNNVLEKNVGLLLEGVDNLLSENSKLSNHQKRIQRLMFERNRFVQRKNQQRLAKNEAPLTEDEINQLLRPLPEPPRGDVLLVSAQVNQFCDKIGQFSAQSLSKMHLAEALQGRLKDSSAAFLSAIQKESQSDA	1.19	1.71
	A18, 17	54	EZ761096	contig17553:79:458:1|similar to Probable adenylate kinase isoenzyme F38B2.4 (Q20140)|Evalue: 2e-21	353	13573	8 (6)	61.9	126	7.79	MAAAETKKGAAVAVVDNAADSKITVPIVFVMGGPGCGKGTQCGKIKEKFGFTHLSTGDLLRDEVKSGSARGKELNAIMEKGDLVPLDVVLSLLREAMLREQKHSKGFLIDGFPREVAQAHEFEKQV	3.83	4.4
	A13, 12-15, 18	92	EZ761160	contig17807:1:460:2|similar to Glutamine synthetase (P51121)|Evalue: 9e-67	352	16934	12 (6)	44.1	152	6.71	DLWMARYLLHRVAEDFGVVVTLDPKPMTGDWNGAGAHTNYSTKAMREAGGLAHIESAIEKLGKNHEIHITKYDPRGGKDNARRLTGKHETSSIHDFSAGVANRGCSIRIPRSVAEDGFGYLEDRRPASNCDPYSVTEMIVRTTCLDQTGESK	2.57	6.42
	A17, 16-20	56	EZ760221	contig07695:1:240:1|No Annotation	352	9084	13 (6)	65	80	4.96	EVEIVRLENPDGIQYNGKKCGWIFSGCDTAITAYLDKDKPFTPIKTEDMSGWTQVWSKNKITSEDIRKSVTADVCGGAFN	8.7	16.38
	A11, 12	117	EZ763028	contig26466:1:1569:1|similar to Aldehyde dehydrogenase family 8 member A1 (Q8BH00)|Evalue: 7e-172	351	57889	8	20.9	522	6.31	VTVLHXKFFTISVYIGKVXGLRVLWCSPQFPFHVLQLQNLDMKLIQVENFINGEFVTNEHLNRIDSFEPSTGLVWAQLPDSGAAEVNKAVAAAKRAFDSWSTTGVAERAKYLNKIADILEQRLDEFAEAESRDQGKTVSLAKSLDIPRSCLNFRFFASAIQTYVSTSNSSDLGAISYVQRSAVGVAGLISPWNLPLYLLTFKLAPALAAGCTVVAKPSEMTSVSAWMLCRVFQDAGLPSGVVNMVFGTGAQVGEPIVTHPDVPLISFTGSTAVGQRIQQVSAPYCKKLSLELGGKNAAIIFDDAPLDKVVDGCIRSSFLNQGEVCLCSSRIFVQRTIYDEFLRRFAEATKRYKTGPPSDATSNMGALISEAHKSKVQSYIELARKEGARIDAHETELPE…	0.56	0.88
	A12, 17	111	EZ761183	contig17905:1:561:1|similar to Fumarylacetoacetase (A5PKH3)|Evalue: 6e-66	351	21203	12 (7)	33.9	186	5.75	ARDIQRWEYQPLGPFLAKSLGTSISPWVVTMDALRPFLCDNMSQEPQPLPYLRSPEKYNFDIKLEVELRGNDTTEARTISRSNFKYMYWNMLQQLTHHTSNGCNVCPGDLMGSGTISGPTKESRGCFVELTWKGAEPIDIGNGITRTFLKDGDEVTLKGFCDDGEKRVGFGVCTGRILPAVDYPLK	2.24	2.4
	A10, 9	107	EZ760666	contig11595:1:1582:2|similar to Mitochondrial import receptor subunit TOM70 (Q75Q39)|Evalue: 6e-57	351	58955	8 (7)	16.3	526	5.26	AVTGSGTSSTTTTKMAAADTAVTDKIKALKSSGNKLFREKKFNEAKGVYSEAIQLSIRAKDSHDLAVLYQNRAACNENLGDLNGVLSDCSAAIDVDKLYVKAYMRRGRAFESLSQPEKAFEDFITASVLSNFQNVEFQEAADRVLKVLTEATVKTELEKWGQRPRQLPKSFIRSFFNGFVSDPVISRIQNPEMVEEATDRALNLAFIAFRERRFSDVIVHCTDEIEHGSTDRLMALLFRGTMYFLFGQESEAKTDLQMVADNPIASLAERSNAKIKMACLMRQETGGNLSDSINSLNAAFLDDPTNSDICFHRAQCNMLMENYAAAAADFRLSTELRNQPKDISYVHLAQMEYKQSVASGQGTDIERHVTDLRRRISGLPESAEGHLAVAQALCDVQQF…	0.54	0.6
	A14, 15	78	EZ759827	contig05086:1:335:3|similar to Glycerol-3-phosphate dehydrogenase [NAD+], cytoplasmic (O57656)|Evalue: 6e-17	350	12281	11 (5)	49.5	111	9.8	RTSEGMFTKGVFRNLPFTSLTCYQISVGTRHSNSSDFPRFTSSVARKMSGEKRIAIIGSGNWGSGIAKVISGNLANGVPGFAKELRMWVFEEDINGRKLTDIINTENENVK	4.58	6.25
	A16, 4-6, 15	75	EZ760111	contig06886:1:366:1|similar to Tropomyosin, muscle (P15846)|Evalue: 1e-39	350	14069	12 (7)	52.9	121	4.55	EVARKLVMVEADLERAEERAEAGEIKIVELEEELRVVGNNLKSLEVSEEKALQREDSYEEQIRVLTTRLKEAETRAEFAERSVQKLQKEVDRLEDDLVSEKERNKALTEEMESTLQDIQSM	3.55	5.17
	A19, 18	47	EZ759350	contig02400:1:762:1|similar to Transmembrane emp24 domain-containing protein 10 (Q5E971)|Evalue: 3e-62	350	29548	13 (7)	25.7	253	6.36	LFCRYDIDSQVYRFQSSHLYCVRLPFSSLLICIGSVVSSADMCEGRPFYVLLTTALLVISADAISLHLPPNVKKCLREEVQKDDVVKGDFELSVSTPDVRTSLDILDSRGHKLFSKEDAQKGKFAFSVEDYEIIELCFETRVNVQYGRQPPPPREITLTLKHGVEAKNYEDIAKAEKLKPMEAELRRLEDLSDSVVEAFNHMKQQEHQMRSTNEQTSSRVLWFSAFSMLCLLGLTTWQILYLRRFFKAKRLIE	1.91	2.15
	A12, 11, 15-17	112	EZ761636	contig20004:1:1020:2|similar to Lysosomal aspartic protease (Q03168)|Evalue: 6e-121	350	37010	8 (6)	25.4	339	4.74	TDHGNNVQSLMQKYASLAEAEDYKKEGPIPVPERLMNYLDAQYYGDITLGTPPQPFRVVFDTGSSNLWVPSTKCSFLDIACLLHNKYDAKKSSTYSANGTEFEIHYGTGSLSGFLSTDNMGIGGVSVENQTFAEAVKQPGIVFVAAKFDGILGMAYPRISVQGVRPPFYNMIDQNLVPKAVFSFYLSRDPNATVGGEIILGGSDDDYYVAPFAYSKVTKKGYWQFKMEPSEXGGKNFGACESGCEAIADTGTSLLAGPSDEVREINSAIGAXTFLSGEYIIDCDRIQSLPDIAFVIGGKPFVLKGPEYILQVSQMGKTICLSGFVGIDVPPPLGPLWIL	0.82	1.83
	A8, 4-12	96	EZ760560	contig10542:1:699:1|similar to Filamin-C (Q8VHX6)|Evalue: 2e-49	348	26529	11 (5)	33.5	233	5.97	ILLSICQQKTCLFTAHQYTVCVVLCSRFCLQIPFRFLSGQFTNCLRSVSPXLDAXLVSPFDSTLCSGCNCLNTVFVSAYTWITYVYNWDSLRSXXRGHNEDAEIEDLADSAYKIRFVPQEQGVHTISVKHKELHIPGSPFQFTVGPLKDGGPHRVYAGGPGLERGEVGESCDFNVWTREAGAGLLSISIEGPSKAKIDFKDRKDGSCYVSYQVTQPGEYTVNIKFNDQHIPDS	1.04	4.4
	A16, 17	78	EZ761955	contig22061:1:563:1|similar to ATP synthase subunit b, mitochondrial (Q94516)|Evalue: 5e-13	348	21457	11 (7)	62	187	5.78	MMALRVPTERIFQSGFVSAALKQNRGFKSSAAMQYISTETNKGRIVEITDPKMISEFKPYVPSGETKIMEEPTRDLVNFPRPTIRLYPKPIRHWIFPETWMDFFYNKTGVSGPYSFGVGLVTFLISKEYFVFEHDAPLIPALSIIAAAVLYKFGAKISATLDKDVDEEEEDLVTWQENQMAQWQTRI	2.2	4.91
	A15, 16	66	EZ762367	contig23804:63:702:3|similar to Hydroxyacyl-coenzyme A dehydrogenase, mitochondrial (P00348)|Evalue: 1e-59	347	22782	6 (5)	30	213	9.35	MLSKVIHQQIRTYASATNSIKHVAVIGSGLMGSGIAQVTAASGAQVTLVDQSSDALKKAQKNIEGSLTKVANKQFANDQQKASSFVSDALQRINTTTDASAAAKNADLIIEAIAENLDAKRSLWKSLDSVAQKHTIFATNTSSLSVTAQAEAVQRKDRFGGLHFFSPVPMMKLVEVVRTTDTSDETHNALMEFGKRVGKTTVACKDTPGFIVN	0.99	1.14
	A16	79	EZ761630	contig19975:182:1018:2|similar to Nicotinamide N-methyltransferase (Q06AV1)|Evalue: 2e-26	347	32429	8 (6)	29.5	278	4.68	MKFRYDYNRDFNARKYLEQYYKTDQNGSNLDKSIHGFILPKLKEIYESCDKGKGRFLDVSTGPSIANLIPASMKFHYLYCTDFTPSCRMELTLWCAGDQGAYDWTPFFKYVSRMDNKEEEWEDYDERLRNCIIGILPIDLQQSDPLIPEKLTPFDVMSSSFGFSAACADYDDLENSMERMSEYLLSDGVLVLVEAINATYYIVDDEKFKRCAFSEEDLLKALKYAGYQNIEIIRASDSNLKMDSKLTDAEDVVIIRATKKKPTEAQLNTQVSIEEIGA	0.8
	A12	113	EZ761789	contig20811:97:705:1|similar to Sorting nexin-6 (Q5R613)|Evalue: 2e-75	347	23771	8 (7)	53.7	203	5.34	MMVDTDFTHDIPIEKDGRRRAETVDLADSPLVVDISDAVSERDKVKFTVHTKTTLPEFQKPEFSVVREHEEFVWLHDRYNENEDYAGYIIPPAPPHPDFESSRRKLQQLGESEGMMTKEEFAKFKQDLEAEYLALFKKTVAMHETFICRLAAHPILRKDMNFQVFLEYEQELGIRSKNKKEVFDTIKKSLFKQADDVLLSGQK	1.52
	A17, 16	57	EZ762012	contig22343:1:591:1|similar to Tumor protein D52 (P55327)|Evalue: 1e-08	346	21345	8 (7)	30.1	196	5.5	EEKLKLELERSEKEVWKLQLVKVEQEVDALRRVLNAKIEEAQELKSKIGITVWQEMKTDLAEGVQAVKETSAYQQATTGLKAAAEKTGAMFHTLGEEVMHILTELKDGAMTSTSTQSSTGPAFDATIISPPAASTVVDEKITVKTTSKQDSSMPTGLHAHVEQKNVAETRADSKGDSGGLIGLEEVHKKTETIIKK	1.78	2.58
	A8, 11	98	EZ760617	contig11158:129:893:3|similar to Protein unc-112 (Q18685)|Evalue: 1e-38	344	29027	6	29.4	255	8.65	MALPMMNVKNLIQDSKLMAKGAWDLSVYITDLEIDKLVTVTGDMNIGGVMLRLVSDLGLTRDWSDHELWWPEENKWLNRSRSTLDQYNVTAAARLYFTPKHKIVRVQLPDLQYVTVSVDMSKSVFKAVVHLCNNLGIRHGEELSFRRVLDRNNIRQNTVISADLNPRIRDDPAIIANGHQQHLQSQQLQSQQHLQIPVHTLNHSTSGNSLDRSYGATPPPNHPYGTLHTPSPQATLIRNSAREAEKWSPFYAQNP	0.92	1.03
	A12	114	EZ762232	contig23327:25:746:1|similar to Fumarylacetoacetase (P25093)|Evalue: 8e-88	344	26281	11 (7)	37.1	240	6.29	MASSVIPTAKDVRHHDFSLDNLPYGVFSTKDNAQRRIGVAFGDLILDVSVVADRLFVGPVLSKNRDVFGQETLNAFMSLGRDAWSEARTALQKALSDDDQTLRGDASLVAKAFVQQSAAQMHLPAKIGDYTDFYSSKNHASNIGTMFRGPENALPPNWVHLPIGYHGRASSVVVSGTPITRPNGQTRPDESAPPLFGPSKQMDIELEMAFFVGPSNRHGEPIPIHKAKDHIFGMVLMNDW	1.6
	A12, 13	116	EZ762302	contig23577:1:1110:2|similar to 26S proteasome non-ATPase regulatory subunit 11 (Q2KI42)|Evalue: 1e-125	344	42271	9 (7)	20.6	369	5.73	LLVLGFCLIFPLISSLQLRKMVNAQLSEELEHASELKKTNPQAAFEILQRLVHLEVNMRDEESVRIKEQSILEMGSLLSKGKMVRELEELIRFTRPFLNTVSKAKAGTVVRALVDFYLNMNMDTGAEIELCHECIEWARNEKRAYLRQSLEARLLNLYYEKKKYSEALQLATQLLRELKKVDDKQLLIEVMLTESKTYFALTNVPKSRAALVSARTTANAVYVQPSMQAQLDLQSGIIHAAEDVDFKTAYSYFYESFEGFDGVDDPRAITTLKYMLLSKIMLNQAEDVHIIVDGKLALKYAGKDVEALRAIAKASSDRSLADFQKALSEYKAELVDDPIIRAHLDDLYNKMLEQNLSKIIEPYSRVQID	0.97	1.05
	A8, 3-16	99	EZ763311	contig28231:1:506:3|No Annotation	343	19585	10 (4)	36.9	168	4.99	GSVQTPTAGLNVSFTAAKIEKELFMENNIXYYFDRSYVPKQLKSHYWTEDNESVNRLTIRYGVESQSDQSAYDYQGYAKVITFIEDEALEVANYVTQMRLSKDWRWMGVFWNTTWLNSEEQLEFFNVSLTVLNATRHASPDRLMAYTYNVSRNDWNAALDARVKSSPE	1.6	20.21
	A18, 16-22	57	EZ761971	contig22153:1:225:1|No Annotation	343	9026	14 (4)	77.3	75	4.87	YKVNLRVHVVDVDVGSTNDLIEDFNCKFTVDYNRIAQSQNDADFQASENCEPLRQPQNTELQFRYRYYRIPPAQC	12.81	21.89
	A19, 16, 18-21	49	EZ762368	contig23806:97:584:1|similar to 60S ribosomal protein L18a (Q3T003)|Evalue: 2e-68	343	19115	14 (7)	33.3	162	10.31	MKASGDLKEFKVVGRGHVTDKNPTPQLYRMRIFAPDRVVAKSRFWYFARQLKKLKKAHGEIVACEEVHEKNPTRIRNIGIWLRYDSRSGTHNMYREYRDVTVAGAVTQCYRDMGSRHRARAHSIQIIRVEEIPASKCRRPNIKQFHDASIKFPLAHRVNIDL	2.67	3.59
	A16, 4, 5, 12, 14-19	81	EZ759116	contig01191:1:298:2|similar to 40S ribosomal protein S3 (Q90YS2)|Evalue: 2e-32	343	10875	20 (6)	81.6	98	8.29	RAKSMKFTDGIMIHSGDPINHYVDKAVRHVLLRQGVLGIQVKIMLPHDPSGKSGPRRPLPDNITIMEPKEEDYHITPSSEQKEQQGAVQPVTNVTMSG	19.75	31.11
	A11	120	EZ762691	contig24996:316:1764:1|similar to Atlastin (Q9VC57)|Evalue: 3e-161	342	55029	6	16.6	483	5.58	METVTDALTEEGRALQVVIAHDDHTFSLDEEALSTVLLRRDVQHKKVVVISVAGAFRKGKSFLLDFVLRFLRASEADIRSGQWMGSDTQSLEGFPWKGGSERYTTGILLWSQPFHRTLANGDKVVVLVMDTQGAFDSQSTVKDCATVFALSTMLSSVQIYNLSANIQEDDLQHLQLFTEYGRLAMESTTAKPFQKLMFLVRDWSFPYESSYGLDGGQKLLNKRLELSDKQHAELQQLRKHIRACFNSTEAFLMPHPGLKVATNPNFDGRLSDIEPEFREQLRTFVPLVLDTKNLVPKQINGTQITAGELLEYFKSYMKIYQSDTLPQPKSMLEATAEANNLTAVNQAREMYNERMEEICGGDKPYLSPQLLEHEHAMAQIDALKLFREIPKMGGEEFSV…	0.42
	A13, 12	95	EZ760410	contig09260:357:1538:3|similar to Squalene synthetase (Q32KR6)|Evalue: 1e-52	342	46657	8	23.4	393	5.94	MAMANRRSSLTGSMVAPRLRRRTISKTETEFDDLALDXAKRDESLKKCYEYMTKTHNIFADGIMLCDGELRFALCLNYLVMRAIDTFEDDPTTPIDEKSTQMHALLDKLYKPEWTYKKSGDKNRFVLENFNHISAEFRKLRPELQQIIIEQCRLSINGMSRFLNREFVTFDDLKEYSYYPSTLYMIGCNRLLKACHPRSVDYNAFEKLTESFGLMLQYIDVIADFHGDVRDDRLFWPKDLYSKYVDNVRDLSDPQYSKEALLCLHEFVLHTLQFXXPDVITYLQMVPQSGYFRYLAVIQLLSISSLEKSYGNIELFRGDIEFSDDERAEWILHSRSLESTLKAFEQYSEKILAKVPVDHRDRLKFESIFRKAYGERTNKWTVHLVHFQSESAD	0.73	0.8
	A12	117	EZ761703	contig20312:1:900:1|similar to Multifunctional protein ADE2 (P51583)|Evalue: 1e-75	341	33372	5	22.1	299	5.19	KDDAAHDPQWTSEQIIVAKFTYETSVGRVVIDESALKLLLEATDTVFQILEKFWYTRDCTLVDMKIEFGVDKSTGELLLADVIDSDSWRLWPDGKAELMKDKQVYRNMSEVTESGLQTVKRNFEWIEEKLQTISEKARKSRAVIFMGSPSDREHCTKIANEIQMFGIETILEISSAHKDTKETLDIAHQYEAEYDVTTVFVAVAGRSNGLGPXASGNVDAPVINCPPPSSTLSNDIWSSLSVPSGLGCTTVLTPNQAALAVASIIALSDYRVSAQLKVQKFCNKRGLRMANSKVKVAPN	0.61
	A8, 7	100	EZ759932	contig05746:82:1686:1|No Annotation	340	56808	7	18.2	534	4.35	MTKLIVGLFLILLTVQWSALVYGQDEPVVEATVDPLIEGDPIRPLITLTPDVTVDDTTDASLAQDTTVITEETPSPDAAETTTVADEGATTDSPTTLADEAVTAEAVDETTTPVPDDPVVAIAGASGGSAVGIPLEGEPTEATDTDDTEATTIDTNTSELPSDAPVESDLPNAPIPTSIPVIPLLLTTDDSATSSAPLADANVLPDNTTDADNAVPIVPLIPLVTDVPDTSDADSTKSNGTLLPVVIVPTAVKPPATTNTPPKPLAATPLPAASGPWYGWFLGETGLLITCGLILLGIILCCLRVCCAKKKSRKIAESTPPALVIDKPYDTETDLRPTTLKDSEAYAQQTILQTRREQNLYTSISIGTPIKESTATGTAAHSVTRTSVDTSPYRNGVPA…	0.48	0.73
	A9	107	EZ762706	contig25049:1:1434:3|similar to Methionyl-tRNA synthetase, cytoplasmic (Q6PF21)|Evalue: 0.0	339	55488	7 (6)	17.2	477	5.51	MASTASTSADATKNITELRSFSDEQLSKSLDEWNGVLKHGISMTQRKHPILPQKGTRNILITSALPYVNNVPHLGNIIGCVLSADVFSRFCRLKSYNCLYICGTDEYGTATETKAIEEKLSPREICDKYNALHRQVYDWFRIDFDYFGRTSTEAQTSIAQDIFWKLHNRGFMLEESVNQLHCAQCNRFLADRYVEGTCPLCSYEDCRGDQCDKCGKLINAIDLIRPRCKLCRESPSVQVSTHLFLDLPKIQPQLEQYLERAFETGLWSHNAKTITQNWLRDGLKPRCITRDLVWGTPVPLEGFTSKVFYVWFDAPIGYISITKNYTDEWEKWWKSAAEVEYFNFLGKDNVPFHSVIFPATQLATDDNYTVVNSMSATEYLNYEDDKFSKSRGVGVFGTD…	0.5
	A6, 4-19	51	EZ762991	contig26295:1:531:2|similar to Vitellogenin-6 (P18948)|Evalue: 4e-16	338	20178	26 (5)	64.2	176	4.84	DEEKIQWLKSIKNMGLPEFIPQLEQIIEDESLPVYIRTQAIYALVHMIHVAPQEVYQILLPIYHTTTIPYQLRIAAYSVVIYSQPPIDVLQSIAQKVNQEPILEVASYVYSSMSTIANLSDPCIKNFTQDLRTVLYTVAPVNTDLTHSKNIHYGMWSEYLKQGIFMEIATTADLDS	4.44	37.64
	A12, 11	119	EZ761762	contig20659:356:1310:2|No distinct annotation|Best-hit: Insulin-like growth factor-binding protein complex acid labile chain (O02833)|Evalue: 5e-15	338	35535	6 (5)	24.2	318	6.32	MASLRHYIISLIFTLFTCFVIGTSGQCPETCMCRQETPSSPLAIVECLGRQLPDFPHDVPTDASIVRFEQTLFTRLPPNAFSRLDXIKRVRVRNSGLAQIDAEAFSGVSNVKXDIIQKNHNLNRISTHAFSNMXXNIKELNLKDNQIAMIEKNAFAGTTNISLLNLEENPLQILSDGAFSELKNVDLIGLPYGIRVIEAGAFDGFAVRLLDLAVLKMESLVEGAFRGLNVKSLFIRNSSIGTVGDGAFSGIEHIRLFDHQKQVIQSIDNNAFRGLRGVERIVFENNFLGQLSSSLAEQLNQSARLLAIRNLSVNCDCS	0.71	0.91
	A8	101	EZ760486	contig09780:655:1395:1|similar to Peroxidasin homolog (Q92626)|Evalue: 2e-14	338	27061	7 (6)	30.4	247	8.99	MPTFQMPFFQMQPFKFATINEQFPQLSTQTLTNFIKKAQEQAATQFTSFPNNGLLGFTPLNFTFPILPFGSPGSQSGIFTTSRPESIDKAKDAVTSEQVSKQVAKELGLNKTSAPDALSNVILPTSKDKPTACNDDDIPVVSLANPFDARTLPACAKSKYRSRDGSCNNIAFQKRGKESTNFVRLLAADYADGISQPRRSNVGQTALPSARAVSAAVIGLTVNPAPTWTSMFMQYGQFLDHDLTHTP	1.25
	A10	111	EZ762131	contig22888:1:1040:3|similar to CDK5RAP3-like protein (Q95SK3)|Evalue: 5e-24	337	38557	5	18.6	345	4.7	LGIKGINVRAELLGATNVLPSLFENIVDLIRPLQAICDYYEKFIDSVRNGAKASQSGAHACLYLRHLIRYGNVPFGQNYGESRPDMDNAMVTAAIEHQEVQFDTLGNRASSQFSMDANFGDTIAENLDELSSKTDISSQSIDLDLGDESVASEISWDLGDDIETVSSIVVEGSGDAQPKNVLDNPELRALAKGELYELQAFLKMRLSEVNNDASGDLLNMRMDNAELALDTASIVRMLQLVNRVIEAFDDRRLQSLCKLTDSPLSIERLVKQLEQQVYFSERMESRVDTYKLRRLEAIADSEKLEPLKSALVHSSRHLQSFIEEDISKKYEGRKVTILGGIQSVS	0.51
	A12	120	EZ761088	contig17524:1:1401:1|similar to Probable saccharopine dehydrogenase (Q8NBX0)|Evalue: 3e-91	336	52112	7	20.6	466	7.78	EYSGGLENTRSSSTLTPYIVLTFSSIRVDIKMAGSLMRTDIVIFGATGFTGERTVREALKLQMHHEREAFTLKIAGRDAAKLKNVLQKSKEILGLPRYGEVEIIVADINSEESLRDMTKQAKVLVDCVGPFRFHGEAVVRACLASSTHYVDISGEPQYIEEMQVKYYEEAHKKGLYMISACGFDSIPAEMGLQFTKDNFGGDLDSVEAILTLKVGPKGGAAHYGTWESLIYSIANASVLSAIRKQLYQTKLPRSGQKLDQKILHYNSTVNGWCVPFPGSDRSIVRRTQYLNYTHHKERPVQFVPYLNCGSLVNALLLMVFGVMVGIMSRFALTRALLLKYPKLFTAGFFSHEGPTEEQIATTGFEYTFVGRGYEQKLSNADEVHVGKPDKMIVTRFSGP…	0.54
	A19, 17-19	51	EZ759056	contig00873:1:333:1|similar to Translationally-controlled tumor protein homolog (Q60FS1)|Evalue: 1e-32	335	12655	15 (6)	70	110	5.66	SGVDVVLNQRLVEVPFLQDKKAFQGYLKDYMKALVKRVQEQSPNEVDQFKTDVQKVVKELLGKHDNLQFFTGESMNAAEGLVAMCEYRPVDGNEIPIMMFFKHGLIQEKV	5.8	6.34
	A9, 10	109	EZ760236	contig07804:188:1948:2|No Annotation	335	63546	8 (7)	16.7	586	9.75	MSVAYDTRTGAVMAASSVHAPNAQTKQRIAILRQTSEKAKSRSNAELTLLLEYYDGSVEMASEALRTADVERILGGWAVTGKKGKKKGKKNQGTSDASDSISEAASVHNNVPSNQQKQPKQQNRNRTADSTSSASALKSSEQMKQSSDTQSSTKNVAQKESVRPSTDLSTQPPKAKPSQSSPHNDETSVVAADTPQSPRRAPREVRAPDLLTHCSQFDSLITQSIEVLDDDMQTLQFCFDQARQALSHRYDNLKRTLERSQQQTLQLLNSRRTYGEQLRDRVLQPTPLAPRDLERRQTDILAFSNDYKHDLDIATTKRFTYAFDQFQKELNRLGEVLVISPPYVSKGQASVTQPPTIGPQTTTLDNRTKALSNNTSAKASKTGADSTQQKPTTANMNPS…	0.42	0.47
	A19, 17-19	52	EZ758988	contig00490:282:923:3|similar to Cytochrome b-c1 complex subunit Rieske, mitochondrial (Q69BJ7)|Evalue: 3e-62	334	23942	11 (6)	22.1	213	8.85	MLTERVPRKVLGVSIPLQGRTQLRFAHTDVRVPDYESYRSKFKDPQERRAYAYMTTAAFGIGATVIAKQVVVTFLSSLSASADVLAMSTVELKLSDIPEGKHQTFTWRGKPLFVWHRTPEDIEAAKKXVNVSELRDPQKDEERAQQAEWLVLIGVCTHLGCVPIPHSGEYGGYYCPCHGSHYDSSGRIRKGPAPLNLEVPTYKFMPGGTLLVG	1.19	2.25
	A15, 5, 14-17, 19	68	EZ759318	contig02251:1:518:3|similar to L-lactate dehydrogenase (Q95028)|Evalue: 8e-61	334	19053	8 (6)	43.3	171	5.83	GTSLDSSRFRYFMSERLGLDVSSCHGYIIGEHGDASVPVWSGVNVAGVRLAEINPKIGTDEDPENWQDVHKQVVNSAYEIIKLKGYTSWAIGLTVSELCSAVLRNKKSVYALSTCAKGFHGIKNEIFISLPCALAENGVVSVVNMKLNESELEKLQTSAKLLWELVKDEKF	2.12	4.21
	A18, 19	58	EZ762443	contig24142:1:612:2|similar to Ras-related protein Rab-14 (Q5ZKU5)|Evalue: 9e-84	333	22996	7 (6)	38.9	203	6.58	GRVTVRSTVEXXXLCIAGKEDSSHLTLKMASAPSNNTPYNYNYIFKYIIIGDMGVGKSCLLHQFTEKKFMSDCPHTIGVEFGTRIIEVAGQKIKLQIWDTAGQERFRAVTRSYYRGAAGALMVYDITRRSTYNHLSSWLTDARNLTNPNTVIFLIGNKADLEAQRDVTYEEAKQFAEENGLMFLETSAKTGDHVEDAFLETAR	1.26	1.57
	A14, 13	84	EZ762722	contig25108:137:1204:2|similar to Guanine nucleotide-binding protein G(o) subunit alpha (P51877)|Evalue: 0.0	333	41054	9 (7)	23.1	355	5.73	MGCTMSAEERAALQEPKRSKKQLKEDGIQAAKDIKLLLLGAGESGKSTIVKQMKIIHESGFTAEDYKQYKPVVYSNTIQSMAAILRAMGTLNIPFANVXKREGRCKLVMDVIGRMEDTEPFTEDLLAAMKRLWLDAGVQECFGRSNEYQLNDSAKYFLDDLDRLGQKDYQPTEQDILRTRVKTTGIVEVHFSFKNLNFKLFDVGGQRSERKKWIHCFEDVTAIIFCVAMSEYDQVLHEDETTNRMQESLKLFDSICNNKWFTDTSIILFLNKKDLFEEKIKKSPLTICFPEYTGAQEYGEAAAYIQAQFEAKNKSPNKEIYCHMTCATDTTNIQFVFDAVTDVIIANNLRGCGLY	0.86	1.03
	A9, 4-9	110	EZ763216	contig27705:858:2429:3|similar to Nose resistant to fluoxetine protein 6 (Q09225)|Evalue: 5e-41	332	61056	6	12.4	523	9.53	MVALSALLFIVAIAATILDHYYRHKQRQEQSLQQTTIYEEKGPNSSLMTQSSRKITRTYNYDVVPRFVKPFLCFSLLGNLRRIFSTPHEADISFLHGIRVLSMWWIILGHTYYIGMNFINNRVMLYEDAKRFGFQIITNAGYAVDSFFLISGLLASYVITRELEKRTGVKSLLYYIFHRWWRLTPVYMFVMLVYVYLVPYGIESPFKLLIQQEGAPTEYCKSYWWTNFLYINNFYPTSLKTQCMNWTWFLALDMQLHLFTPLIVWVLYKFRVIGYVLIGVLVATSVAVTMSLIGAFGLPINFFQDFINYNNDPYYASKEAKDYDYIYQKPYTRMSPYLIGILLGMFFVLKPTVKMNRAMVAWIVWAVVSVAAVLLVWGFWINGFEKTRDQNSTAPVDLM…	0.37	1.47
	A11, 10, 15, 16, 18, 19	123	EZ760051	contig06493:1:1427:3|similar to Coatomer subunit delta (Q5XJY5)|Evalue: 4e-144	332	53312	7	23.2	475	7.25	VLLAACVCNRQGKGLISRQFVEMTRSRIEGLLSSFPKLMTPGKQHTFVETDSVRYVYQPIDRIYMVLITTKASNILEDLETLRLFSRVIPEYCKSMDEPEVLKNAFQLIAAFDEIVALGYRENVSLAQIRTFTEMDSHEERVQMAIRQTQEREAKDAAKRKARELTQLRKDAAKTGGRGAMGGMGSQALPNISSQIKSPQESSRAFDTEKTTYTAPKVTSAKAMKLGAKAKDVDQFVDMLKSEGEKVSVTNRPAAPSATTVIHSNEESVHIRSEEKLTMSARRDGGLQNLEILGLMSFRITDERFARLALKISAEDDRAQIQLHPKFDKQRWQSMQLVALKNPDEAFPLNNEISALKWRFQTTDESHIPLSINCWPTESGTGSQVNIEFSLNEAFENVE…	0.52	1.11
	A13, 14	96	EZ759914	contig05621:296:1522:2|similar to Branched-chain-amino-acid aminotransferase, cytosolic (P24288)|Evalue: 6e-120	332	46394	7	24	408	9.21	MQCSIKVMVNSAKFSQKKGIFVQIRSLATQLSPHTADKSSASFKYNDLSIQKTKEPMAKPDWKNMVFGKYFCDHMFEVSWSDGSGWSRPTISPFHNLQLHPAAKALHYSIELFEGLKAFYGVDGKIRLFRPDMNMKRLNSTAERSTLPKVDGDELLKCMAKLIQIDESWVPREEPSSLYIRPTFIGTEGTLGVARSREALLYIICGPTGPYFPTGLKPVKLFADPKFVRSWKGGAGAYKMGSNYAPTIAIQREAEKYGCQQVLWLYGDDELITEVGTMNLFVFWINENGDKELVTPPLEGLILPGVVRQSLIDLAKQWQGFKFQERNVSMKQLLKAHREKRLIEVFGSGTACVVCPVSDILYKGENLTIPAQSSEDSISMRLYKELLDIQFGRKPHKMG…	0.62	0.94
	A15, 13-17	69	EZ761298	contig18508:1:624:2|No Annotation	332	23925	16 (7)	43.5	207	8.33	RDNSRDRDSGSRTSILDQNNRGGSRDTDFGSSRGNSRDTSRDRDTSIGSRDSFNSGSSLPNDNNFVRIVATLVTFDNPNDLRQDGKKCDSFSKCDPIVFYDLDTERPNANWPGSRQEKLWNSTAKLDNTIRIEFNESQKLIKDICGVPYREANLRVSIQHRNVMLSNDIMNQFDCPITRIPDRALNEREANWSQTMRCLPKKEVKGQ	2.24	4.31
	A12	121	EZ761380	contig18822:1:297:1|similar to Eukaryotic translation initiation factor 3 subunit E (A7RWP6)|Evalue: 1e-13	332	11332	7 (4)	73.7	99	4.33	KEIIENMTDSSETYEALLKIPGFDAQMVDDAYTYAKLKFDTGDYQTATQYLDFYRSIALPNHPRQRDAKWGKLAGEILNQDWDTAIVDLVNLKEDIDSA	2.77
	A11, 4, 12	125	EZ761953	contig22050:1:1540:2|similar to Cytochrome P450 2C20 (P33262)|Evalue: 2e-71	331	58657	7 (6)	14.6	512	8.65	HRYTQGKMAISALFFGFSPILTAVVVVLLSIFSYRHLIIRKVKRLPPGPAGLPLLGNFFEFQISQPDTNKLIRNFVRTGEEYGGIFTLDFGVTQAIFVTDYQSIKDLFSDDRLIAPTPHISFQAVAEQHGLLFSGGSLWKEHRRFAVQTLRDFGMGKSGLEDKIAQEMETLVSELRAVEKQPISTPQYFNVATANIISALASGVQFQHNDDRLKGFVSTLIRAIQVEGQNAAARWFKFLREVPYTPFKAKFEEFKASFRKIEVFIAEAVENNRKTFTYDEPRNYIDAYLLEQKKKENDSSSTFTDKQLLRSSVDLFIAGTETTATTLSWGLQFLMEHPQIAKLVQDEIDECTGNKDFVTMEDRERLLYTEATIMEIQRLATLVPLIGHAVLEDIQYKQY…	0.47	0.77
	A11, 10	124	EZ758912	contig00068:1:1403:3|similar to Propionyl-CoA carboxylase beta chain, mitochondrial (Q2TBR0)|Evalue: 0.0	331	51069	7 (6)	15.7	466	8.87	KVMDQAMLVGAPVIGLNDSGGARIQEGVDSLAGYADIFQRNVEASGVIPQISLIMGPCAGGAVYSPALTDFTFMVRDTSYLFITGPDVVKQVTGEVVTQEQLGGAKTHTTVSGVAHRAFENDIDALLSMRSFINFLPLSNREKAPIREATDPFDRESTSLDTVVPLESTAAYNILDVIGPIVDESEFFEIMPDYAKNIVVGFARMNGRTVGIVGNQPKVAAGCLDIDASVKGARFVRFCDAFNIPIITFVDVPGFLPGTRQEYDGIIRHGAKLLYAYAEATVPKITIITRKAYGGAYDVMSSKHLRGDINYAWPTAEIAVMGAKGAVAILYRGQKDLAKHEQDYIDAFSNPFPAAVRGFIDDIIEPRTTRYRINRDLNLLQSKKLRNPKKKHGNIPLXK…	0.46	0.52
	A6, 4-14, 16, 17	53	EZ760914	contig15494:1:257:1|similar to Myosin heavy chain, muscle (P05661)|Evalue: 8e-18	331	9528	8 (4)	42.4	85	4.83	SEMSSRLEEATRSLNDLTSSKNRMTGESADLARQLEEAEAQISQLQKLKTSLTAQLEESKRSGEDDSREKQALAAKLRNLESDYE	5.45	29.04
	A7, 9	71	EZ759849	contig05199:158:1908:2|similar to Protein LSM14 homolog B (Q9BX40)|Evalue: 1e-25	330	65961	6 (5)	12	583	9.33	MAQASQNIGDASWTPYVGCKISLISKADIRYEGTLFTLDQNQSTVSLANVRSYGTEDRRKEYIPPRELLYQYIVFRGSDIKDLTVNEAPRPDAFELHKQYPQQFSDPAILESSAPVVQPNLSSNASPFSALSSLTGRRPAASNVGMGSSSPFSSMAHPSQQMASVIGANLPASHDNSGLMSGGSSAPLILKPEMMNAPMIPKAQYDLPTRNTNDDLSSQLLSSQSQQQQHYAQQQSSAQQLQSMAQSQSQPQQLQPQQQQQSSQQQMSQQQMSGERRDGQSMQSQSGYRARGNSAQAMDGQYRNNSYGRGRRDNNAGQQYYNNNNNGRSDYRSQNDYGQSQQFNSQRFGQQQQRFGQNNNGYGNQGQERQGQGQQQMNMRYSNADNRQNRYNNNQQRFY…	0.28	0.44
	A13	98	EZ759515	contig03322:1:603:2|similar to Aspartate aminotransferase, mitochondrial (P00507)|Evalue: 2e-37	330	22147	8 (6)	33	200	9.25	QKGLRCTFEKGLFLKCSNXIIKLXVVKYTTKKSTRLLQAKAAHKLWATHRKCLVCFAEPXDSLTIDRXXSIEAMGVWNGWAHVEQGPPDAIIGIQEAFVKDTNPRRVNLGVGAYRDDDGKPWVPPSVRKAEEMLIGKDHEYAPIAGFAEFNSAAAKLAFGEDSPLIKEGNYVTVQSVSGTGALRVGMATIAKYFKGSHTV	1.68
	A14, 12-14, 18, 19	85	EZ761120	contig17641:106:1112:1|similar to Adenosine deaminase (B2T672)|Evalue: 7e-81	330	37506	9 (6)	20.3	335	8.3	MDFLQASAIPRFCLVLIVLLSIVSNGKSASNSPKLSKEELKRKVYNAPKAELHIHIDGTLEPEMAFAISQRNNITLPYANIEALRKSYQFRDLGDFLKVLDIVNKGLVYEQDYYDMLTAYVVKMVKQNLRHFEPIFALNEPLSRGISAETVVRGFDRALADAEKKYDISSILTLGFLRHDSEKDAIKLYEKVLPLFNKYPRLRAVGLVGAERGNPASKFKNLFAKAKSRGLYVVAHAGEEGGPESVRDTLDSLSIDRIDHGVRASEDEKLMRRLADMRIPLAVCPLSNVLLKVYPSIDKLPLLQLMNAGVVVTINSDDPAFLGGYVNANYDAIID	0.66	1.88
	A13	99	EZ761844	contig21179:817:1959:1|similar to Casein kinase II subunit alpha (P28020)|Evalue: 2e-169	329	44266	7 (6)	22.1	380	7.75	MSKGKLQIPSRARAYADVNNHRPREYWDYEAHIIQWGNQDDYQLVRKLGRGKYSEVFEAINVNDNEKCVVKILKPVKKKKIKREIKILENLRGGTNIINLIAVVKDPVSRTPALVFEHVNNVDFKQLYQTLTDYDIRYYLFELLKALDFCHSMGIMHRDVKPHNVMIDHENRKLRLIDWGLAEFYHTGQEYNVRVASRYFKGPELLVDYQMYDYSLDMWSLGCMMASMIFRKEPFFHGHDNYDQLVRIAKVLGTDDLFEYLEKYQIELDPRFNDILGRHSKKRWERFVHSENQHLVSPEALDFLDKLLRYDHAQRLTAREAMDHPYFYPVVKEQAEGGPMGSGMVTSGGARLNQTGAMGSPLGDAGSPISMSPAGSPPQL	0.54
	A18, 13, 14, 17	59	EZ761165	contig17822:1:826:2|No distinct annotation|Best-hit: PDZ and LIM domain protein 3 (Q9PU47)|Evalue: 8e-09	329	30151	9 (5)	29.2	274	9.32	KGGDHPIKSPPPVSTNKSSSPLNTPQFQSLTSPNYPSNNYATSPPYSNNNNYNYQPSIMGTRTQSQPQEIMRLTVKMRAGQGMAVDWGFRTAGEDGRPIRIVSVRPESMAEDVGLQAGDMIYSVGDPAQPIYNLQYQMAVNMIQNQGNSLIMTVQRGGDRIIESSGFQKPAQPQAPSPSVIKRTVRMERPNVNTSWGFQLNGGRDFGQNLIISKITPGSMAQQVGLDEGDVLCFIGETPRQNVAGWTYQQAQQALSNQGNKLIMTVEKKTSQTW	1.08	2.06
	A16	83	EZ759777	contig04771:2479:3345:1|similar to Glutathione S-transferase (P46419)|Evalue: 1e-31	328	34203	7 (6)	25.3	288	5.89	MSKPKFGYWNIRARGEPIRWILAYCGVDYEEKEYSEDNPSEWFLKDKPAMAFEFASLPYWIEGDLKLTGVNAILRHIARRHNLEGNDEREIATLDMLSIFYGVIREKHISLCYRSSDVGYDQKESEYEKDFLMHKLPELSSYLGEKQFVIGDRITYVDFILYEVLYTHKLFIPKWEMREQYTNLADYMKRIESIPSIAKYNEEKSKTRSVYASTAKWQGPPADYITLPESDIPTRKTSEFQSPQTDSPRLDRRDNDPSKAFTVPPEFCHFPLFCRSKVTINTDHMQIR	0.74
	A16, 17	84	EZ762214	contig23276:205:1035:1|similar to Haloacid dehalogenase-like hydrolase domain-containing protein 2 (Q5BJJ5)|Evalue: 1e-77	328	30698	9 (6)	37.7	276	6.08	MANSNRHITFAVQENSPKMSRYGMVLVDLSGTLHIEDQAIAGAVEAIDRLRKSGIPVRFVTNTTKESRRMVHDRLTSMGFHMQIDELFTSVTATRKILEAKKWRPWLLVSKEAMEDLQGLPTDDPNCVVIGLAPEKFNYENMNRAFDMIFNEGAHLVAIHKSRYYQTKNGLAIGPGAFVTALEYSTDTRAQVVGKPDAAFFLSAIPGNFSTHKLNEVVMIGDDIRDDVLGAMKAGLSAILVKTGKYKNGDENKIEPHPTFVAEDIVQAVNYILDDS	1.05	1.16
	A9, 15	112	EZ759561	contig03529:113:1972:2|similar to 78 kDa glucose-regulated protein (Q24798)|Evalue: 0.0	327	68188	9 (5)	12.3	619	5.15	MQQNRAEIIPNAEGLRITPSYIAYTAENDFLVGDAAKRQAGQNPSGTIFNSKRMIGLNYKEVERDIKTFPFKVNNKDGRPFIVVPTKDGEKEFVPQEVSAKILIEMKEIAERFTGKKISKAVITVPAYFNDAQRTATKDAGEIAGLQVVRILNEPTAAAIAYGLDKTDTEKTILVYDLGGGTFDVSILTMEDGIFEVKAVNGDSHLGGEDFDNNVVSFLISEIKREHDVDLSKDKRAIGKLRAAAENAKKALSVAFSTEINVDSLFQKDGQYVPFKKNXFLVPKFEQLNMELFKKTLIPVTKVLEDAKLKKNDIDEILLVGGSTRIPKVKQLLEEYFNGKKPNQSVNPDEAVAMGAAIQAAIVQGKSETQDMVILDVTPLTLGIKTEGDVMAKVLPRNT…	0.27	0.37
	A18, 9, 13, 15-19	60	EZ763150	contig27248:112:418:1|similar to 60S ribosomal protein L17 (Q5UAS2)|Evalue: 8e-41	326	11746	21 (6)	46.1	102	10.56	MGRYSREPENPSQSCKARGSDLRVHFKNTRETAAAIKGLSLRRAFTYLKNVVEKKEIIPFRRFTGHVGRKGQCAQFNATQGRWPKKSAEFLLDLLRNAESNA	5.02	11
	A9, 16	113	EZ762618	contig24686:114:732:3|similar to Heat shock 70 kDa protein 4 (P11145)|Evalue: 2e-90	325	22807	8 (4)	25.2	206	6.75	MTTVDQQEVDPAIGIDLGTTYSCVGVWKNGKVEIIANDQGNRTTPSYVAFTESERLIGDAAKNQVAMNPSNTVFDAKRLIGRKFSDSEVQSDMKHWPFKVVCGSGEKPKISVDFKGERKEFLAEEISAMVLTKMKETAESFLSKKVSKAVITVPAYFNDSQRQATKDAGAIAGLNVLRIINEPTAAAIAYGLDQRKEEKEKHILIF	0.99	1.5
	A7, 8, 12	73	EZ761454	contig19122:2343:3388:3|similar to Probable 10-formyltetrahydrofolate dehydrogenase ALDH1L2 (Q3SY69)|Evalue: 5e-155	325	38361	8 (7)	21.6	347	8.1	SFTKKEPIGVCGIITPWNYPLMMVCWKMAACLAAGNTIVLKPAMVXPFNRLKLAELSVYAGFPPGVINILPGSGTECGKAIIAHPDVRKIGFTGSTPVGQDIMRMCAEGDNLKRVSLELGGKSPLIIFADSDIDKAVRLGMQSVFFNKGENCIAAGRLFVEEAIHDEFIGRVVEEVKKMKIGDPFDRSVMHGPQNHFAHLKKLLEYSETGVKEGATLVYGGKRLDRKGFFMEPTIFTNVEDTMYIAQEESFGPIMVVSKFKTGDVEDVVRRANDTKYGLAAGVFTRDISKALRVSDTLHAGTVFVNTYNKTDVAVPFGGHKMSGFGKDLGRQAIDEYLQTKAVTIEY	0.78	1.05
	A19, 20	56	EZ763001	contig26352:429:1127:3|similar to Rho-related GTP-binding protein RhoC (Q9PSX7)|Evalue: 1e-99	324	26514	6	37.9	232	6.25	MTRVGQISPELXAAHFVVTIALXLTRLTHPTERKSHDXXPMAAIRKKLVIVGDGACGKTCLLIVFSKDHFPDVYVPTVFENYVADIEVDGKQVELALWDTAGQEDYDRLRPLSYPDTDVILMCFSIDSPDSLENIPEKWTPEVRHFCPNVPIILVGNKKDLRNDENTRRELAKMKQEPIKTEEGRAMAEKIGAYGYLECSAKTKEGVREVFETATRAALQVKKNKKKLCELL	1.04	1.17
	A8, 7	105	EZ760728	contig12095:1:708:1|hypothetical protein Y9C9A (NP_500684.1)|Evalue: 2e-09	323	25748	5	33.2	235	8.09	ETVRMLCADGRKLDTDAPEYGKPQWRPEMKCPNGYAVCGVRTLVEEPQGAKKDDAAMNAMGLACCKMKVTECNPTDAWVNVVRCDNMNSTTSTTCKYDQVIGLSLSSTQSSSVRTQQLKVIETSMGVEAGSEKYGYKAQFSAELGYSSATGFDWTKSDTKTFNKQTTTSGSFEVPAGEWKKMDQVVGSCGGASVRTATFRFTDSKGGSSIATTPASSSSSTTKKPNGGSWWDIFG	0.63	1.07
	A4, 5, 7	34	EZ761366	contig18777:1:1452:1|similar to Laminin subunit beta-1 (P11046)|Evalue: 4e-40	323	53552	6	13.5	483	4.87	VNDSQALKDNATALQEANVEGALNLTRDAXAKAQDAQSKVIQSQAALAESENVRQSIHGMLRSLESDVEANRNMTDELLRQLDGKVDELTSKMPELNKMVCDGNGQPCDEICGGAGCGRCGGSSCDNGALTKANKALSLAKEANQNIGRLEKKAERILEEVLKASERLQSAHNQSQLAMTMSQNAKDISEALKSELQDLQDNMTNFLNTDRARPSQIRIISDEIRNMSISLQPDEIIELARQINDTILQLTDIDAILAETANDVRNAKQLKMKADNARNKTNEILLIAKDVNSALDAARISQDNARNSITAALADIQEAERDLNQTAKETDAAESISGQSLEGAMTLQTQLRDIEKNYTANQLNLKTAEKNAESAEKLAGDAEKKIIELESKFTSAADQ…	0.43	0.55
	A10, 9-16, 18	113	EZ761557	contig19638:1:657:1|No Annotation	323	23793	7 (6)	28.9	218	5.74	KLVETGVATPAAGKKPAYDDKKPYENLLFLQKLTIKNDDLVKLINEALKPLAPTRTITVTVDEIKLDDKSFFTLDATTKKLKGEFPLRSDDKSTDEEIIKKYIQGHVASLDLTKSDAEIKQNFLTKFVAKESIAANEKEITEKVQAEAAEAALKLKKPGEGEVEEGAESGPEKEKKTTSADEGLPTWAWILIGIGAAGILAAIAFGVYMKVVAKKDKM	1.2	4.16
	A15, 14, 17	74	EZ759039	contig00766:103:1068:1|similar to Quinone oxidoreductase (P47199)|Evalue: 6e-76	323	34835	8 (6)	23.4	321	6.31	MFGGPEVLQIETQVPIPEPDANEVLIRVAACGVNPVETYIRAGVFGVLPKTPYTPGGDAAGIVQKVGSGVTNVQAGQRVYVYSPVIMNSFGAYAQYMIASAWHVFPLPDKMSFEEGACLGIPYLTAMQALTGRSNVRNVLIHGASGGVGIAATQIAAAMGLQVYGTAGTEEGMFLIRQHGVSHAFNHREKGYEKQIMELTKGDGVDLILEMAAHTNLDRDCDLVAKKRXXIIIIGCQGPTTLDARKLMGKEATVEGLLLFQATREELLGYTTQLHKYLESGKCVPVIQKIYPLDQAAQAHKDIMDHGKPSTGKLIIKVQDI	0.73	0.93
	A17, 16-20	67	EZ760118	contig06946:143:937:2|similar to Proteasome subunit alpha type-4 (P25789)|Evalue: 1e-97	323	29694	9 (7)	37.1	264	6.37	MSRRFDTRTTIFSPEGRLYQVEYAMEAIGHAGTCLGIQTSEGIVLAAERPATSKLLDDSVFRSEKIYKLNEDMACSVAGITSDANVLVNNLRLSAQRYALQYGEPIPCEQLVTQLCDVKQAYTQYGGQRPFGVSFIYMGWDKQYGYQLYQSDPSGNYSGWKATCIGHNASTAVGILKQELDIEKTTLAEAVELAIKVMHKSLDAPKLTPEKLEVATLTRANGRTSMKIWSNDEVEKVIKIVEEKEAKIEAEKKEKEAKSKKSFS	0.89	1.75
	A10, 4, 9	114	EZ761874	contig21404:104:1870:2|similar to Probable phenylalanyl-tRNA synthetase beta chain (Q9VCA5)|Evalue: 0.0	322	66798	7	14.3	588	5.86	MPTISVKRDLLFQSLGTTYTDEEFDALCFDYGIELDEVTTEKEIATKEHGDVASASEQVVYKIEVPANRYDLLCLEGLSRALLVYLGKMMPPAYSTTAVPEGLLQTINMEASTAQIRPFVVGAVLRNITFTSETYASFIELQDKLHQNLCRKRTLVAIGTHDLDTIQGPFRYAAISPDNFRFRPLNQQKEYSGTELMQLYSTDSHLKAYLHIIRDSPVYPLITDRNGVVLSMPPIINGDHSKITLNTKNVFIECTATDLNKANIVLDTVVTMFSLYCKPQFKIEPVNVVYPNGESHMYPTLAYKEMTVSATDINKKVGICEAPEMLAQLLHKMCLTASLKEDGDRIQVNIPPTRHDILHPCDIVEDAAIAFRFDNIVKKMPHSMTIGDQFILNKVTDLL…	0.4	0.61
	A19, 17-19	57	EZ762593	contig24583:1:349:2|similar to Histone H2A.x (P16104)|Evalue: 8e-24	322	12030	12 (5)	60.9	115	9.06	AGAPVYLAAVLEYLAAEVLELAGNAARDNKKTRIIPRHLQLAIRNDEELNKLLSGVTIAQGGVLPNIAPMLLPKKTSTGPQGAQSTQESSATQGSSKPSKKQAQASSTQESGQEM	3.53	4.48
	A7, 4, 7-10	75	EZ762766	contig25323:751:1956:1|similar to Basement membrane-specific heparan sulfate proteoglycan core protein (P98160)|Evalue: 2e-15	322	44588	7 (6)	18.7	401	8.68	MSVIPKELFLQQGQKAEFTCSTDDKRFRAQWVTNDSMPRDVIIDGSKLTIANVFPEHNGTYRCEATNSLEGSYTTANLFVYPPGEEVPEKPLQSDFQGTLLNISRLKIYEYSTGNIDCTITSEDSKKDVVWRRIGQAELPPSAVQLDDGEISFQKAQLDDSGFYVCMSADGSSRIVAQLQVVPRATQYLDLFANVSQRPFRLRVSTTKLTVMEGEEIRITCTALGDGSVVQWQRLGFTMPSYASTNKGVLLINKAKLSDAGRYSCRHKDGAAKATAVTVRVNVIPAPTTTTTTTTTRRPTTTRRVTVAMRKPGPEGRQSIDTVTEKPTKFSESLYVVPSLFIARAPQLLTLNYTLPFGNVGSSAGSGDCPYNDYISTLLGLRPCNSNGSQDTPLNLMAR…	0.53	1.33
	A17, 16-18	68	EZ758917	contig00104:1:384:1|No Annotation	321	14940	7 (5)	56.7	127	5.55	KAYLDTESPNADWPGAVAEKNWKTVFSATDQNTAEIGVTIRKDICNRPYHEANLRVICYDEDPASSNDLINQFDCPIQRLPYRNEDAALWSHEVFCLPRHQSDKMKLGFRYNIYRIPQSQCNTTLVP	2.41	3.15
	A19, 7, 18	58	EZ761258	contig18259:2282:2926:2|similar to Glutathione-requiring prostaglandin D synthase (O60760)|Evalue: 8e-31	321	25248	8 (6)	42.5	214	8.68	MRRERNTMASSNYKLVYWNMRGRGEPIRMMFAYANVPFENVTVKREEWPPMKSSVPLGTVPYLEVDGVTIPTSVAIGRFLAKRFDLLGDGDVNQALIDALVDYHQDLCSLLVPVVREQDLERKKQLKEKVFTEDMPKKLEFLEAFQRKYNKDKDYLIGDRLTYADIFIANLMKLFQDFHPSVLDNFAYLKKHCDLVHNTKNIKEYVEKRPKTEF	1.11	2.63
	A14, 13	89	EZ759851	contig05218:1:1060:2|similar to Protein TTE1956 (Q8R8N9)|Evalue: 3e-13	320	39091	5	21.3	352	9.01	MAGDRRDTYHCTTALVPVLKPENLIKAPKMSPQKSSFFAVLIVTSALILCTARGAIVGYFVVPHGSIALDYSHSNFTNQTSEKVARQLHNALKVVSQQISDLNPDVIFLSTPHAIAHLRDFLLYLQPTTDGHTYADNCSDQSCEYKLKLSIDTATSQTLINQLSKSHNVSGISGFGSPGQGSDPLPLGWAEIIPLYYINKLKNMKSILFSHPSRRYNESVAMIPEFLKIGRSLYLRLNKLSQKVVVVVSADLAHTHSKDGPYGFSPAAAPFDKAVVDWLRTLDDHFLLERAASLLNEALSCGYGGMVVLHAMLSQAGLKTIRRKVFAHGSPTYYGMAVASFQKYSNFPYELY	0.5	0.68
	A10, 11	115	EZ760600	contig10999:1:909:1|similar to Histone-lysine N-methyltransferase ASHR1 (Q7XJS0)|Evalue: 4e-14	320	34818	8 (7)	25.8	302	7.19	GVDHTCARNTAFLFDKGNIVFRALTRIPSFKDVGISYTELFTTTNIRQKELQHLYFFTCMCPLCSNSKLNAELHSMRCVNKDCAEPIPADERALKPCPNCHTKQLDENGLKEALKKVDECEKHYEEVYLSIKKALSGPQEIAKKAEEHIKEDGDFMHANSIMIAGINDKAASAKLSMKKYGEALEHFKKTLPCMRKMFTPNDQRIGIQMLTIGLLELKAGNFEEAQKSLDEAVSVFKVCDGEKRTLCSGSKSLLEYAQQKVADSQLKSAEKEELFDKLLEKITDVHMRSLFPLNYKGTKEDN	0.89	1.62
	A16	89	EZ762210	contig23259:1:350:3|No Annotation	320	13010	8 (7)	56	116	5.81	TTPKKEAAVPSGAFFLAPKTELKFKDIVKAWNAAHKDKAISDDVKVTDKSIVFEGYYAPKGTMLDAAKFVKCYNDAEAVELGKKLFETNFIKDEDMKYDDISTISFYLGYKDSVAI	4.14
	A12, 13	125	EZ762611	contig24669:144:1168:3|similar to Heterochromatin-associated protein MENT (O73790)|Evalue: 7e-43	319	38379	5	21.1	341	6.05	MTEYNPASFGSDIPRFDPAFSSAQFSINAYKQLALNAGDNNIIASPFGICLAILLAYVGAEGQTKAQIESTLKVTGFSREEVLKGYGYTVGRLSEVTGGNAPYQLNIANNAYVDKKYPLKSSYIQDIKKYLGVTPSAEDFQANAESVRQKINKWAANATENKITEPLPPNSITADTALVLVNAIYFKSEWDVQFKKWETVPHKFKNLNNQQSTVEMMYRTDQFLYNYNKEAGYQFIAIQHKDKRNSMFVVLPDADKDFKAFEQTLTFDFFKDAAINAKSETVKFGLPKFKFEQEYDLKKTLVDLGISSAFTDEADFSRISEVKPKVSKAVHKAFIDVNEEG	0.51	0.79
	A6, 7	56	EZ762972	contig26217:1:626:3|similar to Importin-5 (O00410)|Evalue: 8e-37	319	23639	7 (6)	35.7	207	4.78	RTILLPLFERGIQHEEAAVRQASAFGWGLMAQYGGDHYTQDCIKIFPKLLEMINQEGSRSEANEGPTENCISSITRFFKYRPQVIESYCRVDEALVQWVAWLPVYADPDETPVVYGYLADLIESNHPSIVGQNYSNLPRIVEIVAEALKEDALEDNEASNPVYNRLIAIVKHIQQDQTMFQNCVANLNQEQQVALSQALNGPLRKLT	1.53	2.02
	A15, 14-16, 18, 19	78	EZ762261	contig23430:649:975:1|similar to Transmembrane protease, serine 5 (Q9ER04)|Evalue: 7e-17	317	11698	12 (6)	59.3	108	8.39	TSQTLLQTTVPIWPAALCEKTMANIQMKKTPMMMCAGYLEGAKDSCQGDSGGPLIVKADDASSATGERFYLVGDVSFGSGCARPRSPGVYGHIGNFIPWIKAVVSRYA	5.11	6.69
	A11, 14-16, 18	127	EZ761501	contig19331:102:1439:3|similar to Legumain (Q9R0J8)|Evalue: 1e-112	317	49863	7 (6)	22	445	6.08	MLRLFTLAALLSASLAVITPTNFGIPSNAPKDSKLWVLIVAGSNEWYNYRHQSDAYHAYQIVKRHGVPPEQIVLMAYDDIANNPENPTKGIVINHPNGTDVFKGVIQDYTKDTVTPENFLKILQGDAKSMKGIGSGKVIASGPNDYIFVNFVDHGAPGLVAFPDGELYAKDLNDVIKKMYTQKKYKEMVFYIEACESGSMFDGLLKNNINVFATTASNPDESSYACYFDDLRQTYLGDVYSVNWMEDSDKSDLNSETLQQQFKIVKQETNTSHVMEYGNLTMAKESVATYQGKKKADDMRLPKASKADAIPSEQVYIDLLNRKVAKATNAMERQYWQSHVNLAIQKRDFVVQTTQKIVSKVADATTQNLIMNGGSRDRLTEDGHECLGIVGRAFSSNCF…	0.57	0.99
	A17	71	EZ762891	contig25826:1:785:3|similar to Glutathione S-transferase omega-1 (Q9N1F5)|Evalue: 2e-29	317	30048	8 (6)	31.8	261	7.56	SRIHIXLNTVCRPDIACDSASAAVEIDHLRICQLCSVTVEGFTLSVARHASCRFLDFLFHRNSVRKLLKMVYGDIKHCTAGSAEPQISKDKPTLYSMRFCPFADRVRLTLNVKGMPYDIVNINTSSKPEWYPNVNPLGKVPTLKHPNGHELYESLIVCEYLDDIEEGKKKLLPKDAYERARQKMLLEVISSKLTPPFFAIMGKKNNEDGPKLIAALEEIEKMLTDDYFAGKDWGYVDLMLLPFIKRIPIIGDSFGVEYGDR	0.88
	A13, 12, 17	102	EZ760528	contig10246:1:782:3|similar to Ethanolamine-phosphate cytidylyltransferase (Q5EA75)|Evalue: 3e-68	316	29280	6	20.5	259	7.9	GRDTYEEVKRAGYYKECKRTAGISTTDLVGRMLLLTRVHHQPDTGPMSPEVHGFTQSPWTGVSQFLATTRKIMQFAETKGPKPTDRIVYVAGAFDLFHIGHFDFLEAARKEGDYLIVGLHTDSVVNRYKGGNQPIMNLNERVLNVLAYRVVNEVVIGAPYSVTAEMLDHFNVSVVVHGNSPVYEDTDGSDPYAEPKRRNALKIIDCGNTTTTDDIITRILNNQRLYAERNKKKEKKEIAAYEAFRKKQNEPMTDGQASQ	0.91	1.4
	A15	79	EZ758978	contig00442:1:827:3|No Annotation	316	31175	6	21.9	274	7.08	KMKAVFGLTVVISLILAIAAAAIIYLTSYTFSSHPTLLVFKQNPAGSTSPISLYAYRSQTTKIKKEDDKDKFASANIAFATDINVPRDTTVTPVQEEELAFATKPEDPFKSDELPDFKIKTILLLINPVLSKEEKKDVPFDEQFIKSQKIVIHQALLQVANDKYPLQMLAEKIFNKMKSTGKAEVPKNDLSKYQKEYDNDTAHKYVRFYSYRCDYTLKESEEAREIFVECAKLDDAANRAGGSLAPIDKDFKRTLPMNLEERDFAIHKAKEFLS	0.84
	A15, 14, 17-19	81	EZ761713	contig20358:1:418:2|similar to Nascent polypeptide-associated complex subunit alpha (Q94518)|Evalue: 2e-17	316	15110	6 (5)	49.3	138	4.57	KNILFVINNPDVYRHPGSDHYIIFGEAKIEDLGHQAQLQSLERLKNQDFGLEGDKKETVTNSTGGDKSDSKDSGQAPASTTKTAVEESDEEDEVDAEDLDSNDINLVMTQAGVKRAKAVKALKRNEGDIVNAIMELTM	2.38	5.85
	A7, 4, 5	76	EZ761612	contig19891:1872:2780:3|similar to Uncharacterized protein KIAA0090 homolog (Q5ZL00)|Evalue: 7e-72	316	33788	6 (5)	26.8	302	9.02	MAVETWSAQVASTGEEVVLVTPKRLHDLVNSQGKVLSDRRVLYKYINPNLVGVFTQGMDDKKKPYLKVFAIDGVTGQVILNSVQRRARAPCFAVHAENWLMYTFWNEKSRTFDISVSEFFRGFDTPNATYFSSLESSTLPDISQASFRLPGFITAVADTVTAGGITHKNLILALSSGAIMQISKIFLDSRRPLNPTQLEREEGLVPYAPELPYVTENVINYFKPVHGVRGIQTGIAGLESISLVFAYGIDLFYTRVTPSALFDVLSDNFDYWILSVVVLVMTVISLIVRKLANRKALKQAWK	0.6	0.91
	A15, 14-16	80	EZ762692	contig24999:254:1354:2|similar to Acid ceramidase (Q17QB3)|Evalue: 2e-117	316	41569	9 (8)	23.5	366	6.24	MMENCRQDTYPPTDYPLSVPTAQLNLDLPASQRWTLLVQSKAQEVRDLITVIKNLVNAFSGGILIKLVDKELPKLIRGLPVDYVDEMQGIADAAQLPLGEIFLYNLFYEFNAFCTSIIAEDKAGNLYHARNLDFGLFLGWDIKNDTWLLTEKLRPIVTNLEFIRNGTVLFKTVNFIGYTGVLTGMKPHRFSLTINERYSLKGGFYGILKWVMGDHRGQWVGHLSRQVFETIDTYSEAKDVLSNDPLVAPIYFILGGNSSGEGAVLTRSADKTVDVHALDSKNGTWFVLETNYDRWKAPLFVDDRRTPATKCMNKLGQQNVAIAGIFDVLNTKPVKNKLTAYTALMDISKGTLETYLRFCGDPCWPW	0.85	1.29
	A10, 11	118	EZ762241	contig23362:342:2066:3|similar to FGGY carbohydrate kinase domain-containing protein (Q6DCD1)|Evalue: 8e-117	315	64102	5	12.5	574	6.09	MASYYIGVDVGSASVRAGIYSKDESKLLKTSTQEITINRRREGNDVDTHQPIVFVEQSSAEIWSAVCKVVREVTRDVDKRQIRGIGFDATASMVLVSRDESKAGPSKHQNGSNDVIMWMDHRAHAQTRRMNQLLKGHKALQYIGGRVFVEMQMPKLMWLKENRPEEFANIQYFFDLTDFLTFKATDSDERNLCSIVCKWTYIIDESDPSNLQKLGWDRELLTTLGLGELADEGFVRIGNRIRASGTPLGSGLTATAAEQMGLCEGTPVAAGLVDAHSGGLTAAYCKSESENSAQLLQRLAAILGTSACFMYCSDKPMFVQGYXGIHTSVWGPYYSAMIPNAWLNEAGQSACGMLLDHIVSSHPYFADHKSELGVSRSEGPGSGTYDILNQRITEILTKD…	0.22	0.27
	A9	117	EZ759891	contig05485:134:1203:2|similar to Zinc metalloproteinase nas-14 (Q19269)|Evalue: 4e-39	315	40866	6	16.6	356	6.54	MRSTPVFPALLLLLALSDGKTVEKREIPSDWKNYLTPEALAQLTDSKEAGTQDTYEGDMLGIDPATGMQKGKVRNALTSKNLLWTDGVMPYEFASDFPLDQQTVVLNAMKDMSSKTCIKFPQHTDEKNWITFRKSQSGCNSYVGKAGKGNQFVNLEDYCIQQIGRTQHEIMHALGFFHEQSRNDRDNYINIIWENIAAGKKPQFDTRKGDVQALPYDYESIMHYSWRAFAKNNSLPTIIPKRQANMGQREKMSVLDMERINKLYNCPVLSPPVTAAIVASTTWRPETQNNNCDVYGGGTRCGCYGGWCWSYLSFNASKEEWCYTQIEGAAAGLKNWANCTKDSQCSWTMTCGSENF	0.6
	A17, 18	72	EZ759582	contig03609:1:822:1|similar to Glutathione S-transferase theta-1 (P20135)|Evalue: 2e-28	315	31481	7	29.7	273	9.33	STVKLNPEKSATVRLKTSEVPFQVIPQIVSRLARNGEQNLLRPYVATVASPVHLVRATGIPNVTEVPIALRRQENQTEDFKKTSPFGKVPAFQENADFTLTESNAIIRYLIESHPTKAADHWYPKDIRKRAKVNEYLDWYPANTRAAFGHYFQIAFIQPITRQKRQDGKKMAELENQMKEVLTKIESYFLQDRPFIVGKELSLADLQAAVEIEQMFSTGKDPLKAHPSLQQWRERVKQQLEPHWTEAHKIIYTVTPRMHEMLRAQNLLATDDN	1.02	1.13
	A13, 12	105	EZ761560	contig19654:1:660:3|similar to Cystathionine gamma-lyase (P32929)|Evalue: 6e-76	315	24793	10 (5)	35.2	219	8.68	QVKFVDFTILEQIASALTPQTRMVWLETPTNPTMKVVDIQEVCRIVKGFNPEILIVVDNTFMTSYFQRPLDLGADISHHSLTKYMNGHTDVLMGAAIVRDDAIFKRLKFLQNSLGAVPSPFDCYLVNRGLKTLHLRMREHMSNGLIVAKFLETHPCVESVHHPGLPSHPGYAIMKKQCRGYSGMVTFLIRGNIDTARVFLQSVKVFTLAESLGGYESLA	1.75	1.89
	A16, 16-18	90	EZ763022	contig26452:1:179:2|similar to Elongation factor 1-beta~ (P29522)|Evalue: 2e-21	315	6686	9 (5)	84.7	59	5.21	KPALIAKSSIVLDVKPWDDETDLKEMEKQVRGVEMDGLLWGASKFLDVAFGIKKLQIQC	19.17	27.26
	A19, 5, 18-20	59	EZ760371	contig08919:1:468:2|similar to Ras-related protein Rab-2A (Q90965)|Evalue: 2e-82	314	17855	6	48.4	155	5.61	FTDKRFQPVHDLTIGVEFGARMITIAGKQIKLQIWDTAGQESFRSITRSYYRGAAGALLVYDITRRDTFDHLTNWLEDARQHSSSNMVIMLIGNKCDLESRREVKREEGEAFAREHGLIFMETSAKTAQNVEEAFINTAKEIYDKIQEGVFDIQN	1.38	2.17
	A14, 13	91	EZ759619	contig03819:1:635:3|similar to 1,5-anhydro-D-fructose reductase (Q9DCT1)|Evalue: 6e-37	313	24355	5	35.2	210	6.83	PSLSIGHTTQKVAPSDIDYLETWKAMEQLQHAGKAKSIGVSNFNISQLTRLLDHCKIKPACNQVELHVYLQEKELVEFCRKHDILLVAFSPLGGGVNPVKGRGFAVDYPSPLQEPAVEEMARKYNKEPGQICLKFLVQQNIAVXPKSTNARRLQKNIELFDFKLDDGDMERLRDLDKHGAVRACSWNHIQDHKYYPFTLTEEQKVQECEW	0.9	1.19
	A18, 19	66	EZ759366	contig02513:1:648:1|similar to Eukaryotic translation initiation factor 3 subunit K (Q28C65)|Evalue: 1e-21	313	25257	11 (6)	37.5	216	5.5	ECDCVCAGNTVSFLNFFRFVLCKIRSELLEKTIMANRGAQSARALNVLRPKIEEIKQSNIDKYNPENIQILQEFVEAQAKENGYDLEANLLLLKLYQLNPGGEYRLSSGPCVTKILLKSLMQIPMNDFQMAKALVDPSDMRVLTIKDVSRLALLLETFQLQYFWEEYDKCRDTISLVHGFDEAVRRYICFVINHTHQTIEEKTLFSYLGNPSADLF	1.7	2.34
	A18, 16-18	67	EZ762590	contig24578:1:638:1|similar to Peroxiredoxin-4 (O08807)|Evalue: 8e-51	313	23970	8 (7)	42	212	6.72	AVVHIMTGDXXEHLSLLFKVKFGKEXVAQTCTFPVVIFIPQKMLRFLGILVFIACIYVVNSSGDDRCNVYGSGDVYPERSRVTDHSVHWSKTQIGKPAPDFKGVTAVIKGKFENVNLSDYKGKYVVLLFYPLDFTFVCPTEIIAFSERTDEFKKMDTVVLGISTDSAYTHLQWIKTARKDGGLGPIQLPLLSDMTHQMSKDYGVYLEDAGHT	1.49	2.82
	A18, 16-19	69	EZ762432	contig24100:1:605:3|similar to 60S ribosomal protein L14 (A1XQU3)|Evalue: 5e-37	309	22431	13 (6)	28.5	200	10.27	CEXAQFSAFLVDVSSPKTDAEMPFQKLVEIGRVAYVASGAREGKLAAIVDVIDHNRALIDGPEVPRQVISFKNLHLTKFTLNIAHTAKHPAVLKAWETADVESKWKASIWARKLDRKKKQAMMGDYDRYRLMRAKQTRNRLIRLEVGKLKIAHRKANPSTKTSKKSVKSGQKATVQKEQVRPSSKETGKAGKEQGSKGKK	1.65	2.81
	A9, 4-6, 8-10, 15, 16	119	EZ762804	contig25471:1:394:1|similar to Liver carboxylesterase (Q29550)|Evalue: 3e-22	309	14882	7 (5)	42.7	131	8.46	YGIICMQVDMKMEGWPQRNLTRTEDCLYLDVYTPPLGSNQTEKLPVLFWIHGGGYAVGDKDFYNATELVKGVKAIVVAVNYRVSIFGFLSTGDKAAAGNWGLHDCKLALQWVHTHIGKIGGDNKKNHHIWR	1.8	4.98
	A5, 5-8	54	EZ759780	contig04782:1:900:2|similar to Myosin light chain kinase, smooth muscle (Q6PDN3)|Evalue: 6e-16	309	35015	7 (6)	23.4	299	8.3	RMTAEECLQHPWLKEAVPSDDSLNSKSRLVKIRNKIRDRYSEFWDKSVLPIGHIANYSSLRKLYPDKHHIADTSFDRREAGPRFVIKPQSQLAYEGQSAKFYCRVVSLEPAVITWLNESGQELRQSVKYMKRYDGNDYFLIINRCKTEDRGEYFVRAESAFGKREEAVFLNVHPMPKEDLIMPHMDIPRSKKNWDLVYDTFEEQKDFAPVFSFHLRHRTIQKGVGVKLLCCVDGKPAPQCKWLKDNREITKQNTSYNMSTAHGVCTLEIVSSEPEDSGTYTCVAVNSAGENDTSCKIII	0.89	1.16
	A13	106	EZ760344	contig08684:1:921:1|similar to Acetyl-CoA acetyltransferase, cytosolic (Q9BWD1)|Evalue: 1e-94	309	32210	7 (6)	32	306	7.53	SGMKAVVSGYQAIRNGDARLIVCGGQESMSQAPHVLSMRSGQFSMGDAHLKDTCLSDGLTDAFAGCLMGVTAENVAGQWAIGRAEQDQYSVDSQLKAAAAMKRGDFAKEIVPVTLQTRKGPVVVSTDEFVKPDTSIELLSKLRTVFKSDGGSVTAGNATGVNDGAAAVLLMSESEALRRGQQPMARIVSWAQVGIDPKIMGVGPIEAMKAALKKAKWTVDSVDLFELNEAFAVTSLAVVRDLGIDLQKVNVSGGSIALGHPIGASGCRVIVSLLSAMDRVTSARRGVASLCIGGGMGIALCLEKCT	0.99
	A9, 10	120	EZ762685	contig24979:203:1807:2|similar to Lamin Dm0 (P08928)|Evalue: 5e-28	307	62289	5	11.6	534	5.63	MKMNTRSRARQTTPNPQTEATPEVSVQVMESLEEQIIEETARHEHSRNSHRSTLSSASTALPSSATTPSGDSSTTSRLHNRTPSPSVRSPTSLSRAEEKQELQYLNDRLARLIEVNRSLVNERDTLKFMLESRSETTTSDARKQFELYDEELANARKLVDEVGLENAKLTVERDRLASELNETKSDMQKKERQMGALEAKKRKAELEREEAISKYNQMKNEWQDLEDSLRNAKKELNDIAKQLEESRKNLENETLRRVNAENQVLSATEELQFRIKLFQDEQKKNSSFTSIVSEVDNAKRSNYDSTLHTQLKMLREQLTEEYREAYETIQENHERKLADLSALNDRMNESTDMMKEEIARLSRELKAARDDTDRMRRVVIEIENERDLWENKYDKQNEE…	0.29	0.34
	A10	120	EZ763165	contig27315:1:1930:2|similar to Ran GTPase-activating protein (Q9VIW3)|Evalue: 3e-42	307	72950	6	11.5	642	4.99	VSFSHRSTYESRHFRFTFKSSLYISVTKCTPKSVKMDRRVLQLTDHIPAKSFRVDEPADVEKFMEILLRATDVKVIHLSRVSLGVTVVKALAATLSRHSELKELYVVDAFRSRDIDDVCANLKAIALGVKASGCQLSVLDLSQNALRATGIMSVEELLTGPTCYKLERLNMSDQGLSPEGGTTLAQLLLKLHKNASMAGQTLALQSFSASKNRLEDGGAIALAEFFKTAKSLQEVKMFQCGIRAKGVKELALALAHNPRLRSLDLEDNGINKGAEQVLAQAIEKLPELENLRIGSSLLSGKGLLGILSAVARCCKKIKNIDVCDNDISEDISKEALNLILKMTSLESLVLAGNKTFKKSRELYERTFREMGKPDLLKKRATDNTYEGQEEDESESDEED…	0.3
	A12, 11-13	131	EZ762307	contig23597:1:650:3|No Annotation	307	24343	10 (5)	35.8	215	6.56	RTVSPLSFNIVNHHYYYVTVNGTNNDRNITLKRFQPSVPSNIETVASYPWRGQDQLQPYHFYVHPRTADIMWFDSADASSSTGVYKMSAAGQPIIFISTSEYDSMPRMLYNQPTDEICWTSAERCMTGDVITVQCASSTAAKRQHLNCSTVSAVYGEYIFYNNLDRLGYTGPSRISRIKFGTTLPELGSKSDTSIVLLERDKVQSLLPVVVAADN	1.46	1.89
	A14, 17	93	EZ759747	contig04575:1:808:2|No Annotation	307	29692	8 (6)	22.4	268	5.71	STRNGPSGVNPGDYEDEPFSENWRFATPLILTGSKDTCLSRRDVSPHPAACLTHSGRVFIVEHLSTAEPAIHLVSHTYVDVHCCVRPSNANNTVVSKPSEGELEACKDATFTVNVIDACAGKENFVGWQISASNGDWNGKEIGWMVESCTAENGGSSLPIFHHESTGSDGISTNANFPEITARKNADGTSNYKYGFDVHYFLPSNAQADLTVNCVVRFCKNGGSSSLTPCPSYPERVCTRRAGDFTLTDFTEKKTRLVPGKVTVNREL	1.11	1.35
	A7, 6	80	EZ759277	contig02068:1:810:3|similar to Importin-5 (O00410)|Evalue: 2e-47	306	30757	5	29.4	269	4.36	ISVVDEDDVEDLEGSDEWTFMNLTGDKQQIGVRHAGLDEKCDALGLLGTYAKELKEAFWGDWMKQTVELMVDTLTFFVHEGCRQNAADAIPALLVVYKAHGKLTGLDEVTPVWQFVFPKLIQSLEDEPDADCMGDKLGCLAECISEVGPSALNSAEITEIMKRLEQELQNYFKNAEERAKSRKDEDYDEEMEEGLDKDAKSDFYVLSRISDVLHHLFKVYGVQILPIFEGNVLSTLFKLAGPNRPYQELQWIICTFDSVLQFCEEGSAV	0.67	1.72
	A5, 4,10	55	EZ763074	contig26751:165:2444:3|similar to Dolichyl-diphosphooligosaccharide--protein glycosyltransferase subunit STT3A (Q5RCE2)|Evalue: 0.0	306	85991	7	10.7	759	8.98	MAEKKTVTSGSFRALGFKTLFPIVILALAWIIGFCSRLFAVVRFEAIIHEFDPWFNYRATAYMTKNGFYNFLNWFDERAWFPLGRIVGGTVYPGLMVTSGAIHYVLSLLNIPVHIRDVCVFLAPVFSGLTAISTFFLTRELWNTGAGLFAACFIAIVPGYISRSVAGSYDNEGIAIFALVTVYYFWVKSVSTGSLYWASLAALGYFYMVSAWGGYVFIINLIPLHVFVLLLMGRFSSRLYVAYTTFYILGLILSMQIPFVGFQPIRTSEHMAAAGVFVVLNAFAFLRYIQRFTKHMNMWLVWGGISGAAFVVLVLLTVMGYVAPWSGRFYSLWDTGYAKIHIPIIASVSEHQPTTWTSFFFDLHILVLLYPVGAYYCIKNIDDNRVFIVLYAVTASYFA…	0.25	0.41
	A19, 17-21, 23-27	60	EZ761577	contig19752:1:370:2|similar to 60S ribosomal protein L18 (Q4PM04)|Evalue: 3e-41	306	13659	13 (7)	45.9	122	11.56	VTHMKSPGRESKIAVVVGRITDDVRVHSIPKLRVCALQVTERARARILAAGGEVLTFDQLAVKAPRGENTQILQGRRHARESYRHFGKAPGVPHSHTKPHVISKGRKFEKARGRRHNVGFKV	3.77	7.52
	A16, 15-17	91	EZ762548	contig24433:1:1039:2|similar to Cathepsin L1 (Q9GL24)|Evalue: 2e-104	306	39191	9 (6)	26.7	345	5.28	THTNRCLYSTPSVFKMRAVLVLCLLAVVAVAWSKPNPNSEWEEWKETHGKEYETTQEEEHRRSIWENNLKMIQHHNLRHANGKESYHLGMNKYGDMTHDEFVKMMNGYVAADFDTSDRITYLSPANVEVPDAVDWRDKGYVTEVKDQGQCGSCWAFSATGSLEGQWFKKTGKLVSLSEQQLVDCSTEQGNEGCNGGLMDQAFQYIKDNDGIEGEKDYPYKARDQKCKYDAKKKAASDTGFVDIPSQNETALQEALATQGPISVAIDASNMSFQFYKGGIYDEKDCSSTELDHGVLAVGYGSKDKADYWIVKNSWGPSWGDKGYILMSRNKNNQCGIATAASYPTV	0.76	1.75
	A11, 12, 16, 18	132	EZ761944	contig22014:1:799:2|similar to Serine hydroxymethyltransferase, cytosolic (Q5E9P9)|Evalue: 5e-83	306	29075	9 (7)	27.5	265	8.85	VGAMLMTDMAHISGLIAAGVHPSPFEYSDIVTTTTHKTLRGPRAGLIFYRKGVKRIDEKTKQEVMYNYEKPINEAVFPGLQGGPHNNIIAGIAVALKLADTPEFREYQKQVIKNSKQLAKSLQARGHAIATGGTETHLCLLDLRPLGLDGAKVEKVLEEALIICNKNTCPGDKSALKPGGVRLGSPSMTTRGLREQDFERIAEFIDRGISIANKVDQKGEKRAATSKEFFARMSEDSDYKGSVAQLRADVIEFATQFPTPGLPDV	1.14	1.47
	A7	81	EZ760166	contig07267:1:3001:2|similar to Importin-8 (O15397)|Evalue: 0.0	305	115368	6	9.9	999	5.19	RVNAEKQLHSMKKIINFGPLILAHISNSTGDMPSRQAAAIYLKNYIQHNWDDPDEDDLKIAAHRGEPPPFGIHEQDRAQLREAVLEAVIALPSVLRSQMAVALERICKSDFPGRWTTIVDRVHLCLQSPQHETWLGALTALYMLVKVYEYRSKSEKSPLDEAMQFLHPLLLRRAQDLMTDTSEHSYLLIKLILKCFYSYVQYEYPLMILNMESSFAWMETVRQLLEQKSPAHIDALDAEDREETSWWKVKKWCLH	0.18
	A19, 18-20	61	EZ761543	contig19542:93:722:3|similar to Glutathione S-transferase 1 (P46436)|Evalue: 1e-31	305	23872	10 (5)	27.3	209	8.59	MLKMTKYKLTYFDARGRAEIIRLLFAAADQKYEDFRMPREQWPQIKQTMPWGQVPALEVDGKVLAQTTSILRYLAKQFGLAGQDKWEEALIDSFVMAVIDLVQAMVKVRFAEESQKEAEMKKMVETIAPTAMANFEKFISEHGSGYVVGSHLSVADLALFDILDAGVTHQAFTENDIQKTPKIKEIYEKVKQHPRVATYIKNRVAEPKK	1.2	2.03
	A17, 16	74	EZ761174	contig17853:205:969:1|similar to GrpE protein homolog 1, mitochondrial (Q5RA81)|Evalue: 1e-47	305	28432	7 (6)	28.7	254	6.99	MALVNRIYTPLRRFCGLDLFATVNRVQSESVSYSTFRDFFSSSKRSDVRTNTRTAESEESSTGNYAQSEDSKAANRRETESAANDAEASAEEPKNLLTEENAILKEKLSVLNDKYLRAIADTQNVRNRLTKQIEDAKIFGIQSFCKDLLEVADILSKATHTVSEDQLKSGSAEMRTLYDGLVMTERQLQKVFGRHGLEKIEAAGHKFDPNLHEALFQVPSSEGKEPGTVASVSQVGYKLHSRVVRPARVGVVQR	0.94	1.06
	A16, 10, 17	93	EZ763098	contig26932:43:801:1|similar to Chloride intracellular channel exc-4 (Q8WQA4)|Evalue: 2e-50	304	29584	6	34.5	252	6.13	MNGTTETGQPPEVELLIRASTIDGRRKGACLFCQEYFMDLYLLAELKTIALKVTTVDMLKPPADFRSNFEAAHPPILIHDGIIISENDKIERHIMKEIPGGHNLFVKTXESEAKIENLYKKFKVFLLQNNDQSRHSLVTCLKNIDTHLAQKNSRFLTGDSICCFDCELMPRLQNVRIAGKHFCNFDIPMEFTHLWRYMETMYKLPAFIESCPADQDIVHHYKLQMSLKMAKHEELEEPTITKTVPDELSYRN	0.89	1.11
	A19	62	EZ763103	contig26949:108:641:3|similar to Bifunctional protein glmU (Q2JVA4)|Evalue: 4e-20	304	19385	4 (3)	30.5	177	6.18	MENRAVESTSTSEAHASHSFRTGITGHALRLKPGEDIFSSLQTYVRTHNLKAAFIMTAVGSVTEITVRFAHDRTTGNKIFTFREHLEILSLVGTINEGSHLHVSLGAKDGRVFGGHLMGPAIVFTTCEIVIGNCEEWTFLRPFDQATGFPELLPVRNTALDSATHSVTESADSASLR	0.9
	A13	110	EZ759541	contig03443:1:1247:3|similar to mRNA export factor (Q7ZWF0)|Evalue: 1e-124	304	47176	5 (4)	15.7	414	8.8	RCCVLMKIRSKNXLIFVLHTRLSFAFDIXSDTSALVQLNRKMSLFSPSTSTGLFGGSGQQNTMMATQKDYEVPSAPDDTIQALRFSPPSIPQNYLISGSWDNLVRCWEVNIPTLMPGQTAPNLQAAPKAQQIAGGPVFDVAWSDDGTKVFTGGADKVVKMWDLASNQYIQIGSHDAPIKTVHFIQAPNYQCVMTGSWDKTLKFWDARQPNPMLSIPMTERVYAAHVVYPMAVVCTAGKNCTVYSLENTPREYKKMEMNLKNMLRCVAICTDKKSNTPAPNGYAIGSIEGRVAIQYMNPANPKDNFTFKCHRVDAPTQEVYPVNDLAFHPVHGTMATVGGDCKFNFWDKDSRTKLKQSEKCEQSLTRCCFSARGEVFAYAVGYDWAQGHEYNNPQKKPQI…	0.31
	A11, 12	133	EZ761633	contig19989:292:1617:1|similar to Vacuolar protein sorting-associated protein 4B (O75351)|Evalue: 7e-180	304	49353	6 (5)	18.1	441	6.14	MTSGNAIQKAIDLVTKATEEDKKKNYSEALRLYQHGIEYFIHAMKYETQGDKAKESIRSKCNEYLERAEKLKKYLKGESEKKKPVAAGEGAAPKKADKENDDGSDDEDPEMKKLQSRLEGAIVIEKPNVQWNDVAGLEGAKEALKEAVILPIKFPHLFTGKRTPWKGILLFGPPGTGKSYLAKAVATEANGSTFISVSSSDLVSKWLGESEKLVKSLFEVAREKKPSIIFIDEIDSLCSSRSDNESESARRIKTEFLVQMQGVGNNSEGILVLGATNIPWILDSAIRRRFEKRIYIPLPETNARTEIFKLNLGDTAHDLTEENFRQLGAMTERYSGADISIVVRDALMQPVRKVQTATHFKKVMGPSPSNPTQMTELYTPCSPGERNAIEMTFLDVPGD…	0.47	0.54
	A16	92	EZ763328	contig28288:1:1091:3|similar to Delta(3,5)-Delta(2,4)-dienoyl-CoA isomerase, mitochondrial (Q62651)|Evalue: 5e-81	304	41160	9 (7)	21.8	363	8.78	DLHSIFLLPPFVFAAYTSQMHSSKSLLRCARLTRYAQKPVEWPLIRALDVRYNSNAPNSRTSQKAKTYTFHTLHITKPAEHVLQVELNRPDRLNAMNKDCWREMRECFDAIAIDPDCRVVILAALGKHFCAGIDLMDFASIGQQIQQSSTDVGRRAFQLREVIRAFQDSFTSIERCPKPVIAAIHAACIGAGVNMITACDIRYCAENAYFSVKEVDIGIAADVGVLQRLPKTVGNDSLVRELAFTARKLYASEALQFGLVSRVLPDRDTTVMVALETAKQIAAKSPVATLGTKINLNYSRDHTTAEGLDYMVNWQSAMLQSEDLMKAAMASMDKNSKSTPQFDNXLKWYDEKKTQVFSVLRTP	0.72
	A13, 14	111	EZ761239	contig18178:1:889:3|similar to Aldose 1-epimerase (P05149)|Evalue: 2e-45	303	32194	6 (5)	26.8	295	5.71	FGKLPFAQPVQLYEISNRNGLTLQVINYGARIIGIKAPGLNGELVEVVRGLKDLEAYEKDQLYFGAMVGRTSSRVKPLNITIDGKECHLLPNAGDTHLHGGPNGFHQQMWKSDPIEEDGDVCGVKMKLVSPDGTDGYPGELTTTVEYRVTSSNEIVIHVTATTDAPTIVSMPSHAYFNLGGPKEARIHDHHLTIHCDKYTPFGADLLPTGQILDVEGTPYDLRTAKLLGAAMARMPGKGIDDHWAVDIRPKDEPVLTATAYHPKTGINMDVMSTYPGLVVYTGNGLTEQVIGKNG	0.8	1.02
	A17, 16	76	EZ761640	contig20012:1:298:2|similar to ATP synthase subunit b, mitochondrial (Q94516)|Evalue: 5e-26	303	11784	7 (6)	45.9	98	9.88	AEKKAQWQAKGQKFLFEAKRENVQLQLEAXYRKRLSHVYREVKKRLDYQIEVQNARQRVEQRHMANWIVKNVLSSLNEKQEKENIDQCIANLNRLSAA	3.66	6.26
	A19	63	EZ760438	contig09415:132:1109:3|similar to Guanylate kinase (Q64520)|Evalue: 9e-48	302	36590	5	22.5	325	8.98	MWLSKFASIALSPSAFVRLARNYRLNTTNTLTHSQTLTPLRSSRVALVTSRVALFRSLHTTMAPLSSTTRPVVLSGPSGGGKSTLINRLMADIGKDKIGFSVSHTTRKPRPGETHGIHYYYVSREEFEAMIKGGQFVEYAEFSGNMYGTSVDAVKKVLESGRVCLLDIDMQGVQSIKKTTLEPVCISIKPPNIGELERRLRGRGTETEEAIQKRLAAARPEMDFADTPGAFDYVVVNDDLENAYKNLKTVIDKVMAXPEAESEESFVVCLRLRTVRFVSLVVFWLFCPFFVAVFFTETVVFSSQICPCFLCKANAVQICIWASII	0.54
	A11	134	EZ762324	contig23648:380:1816:2|similar to Coronin-6 (Q920M5)|Evalue: 4e-136	302	53403	7	19.2	478	6.33	MAVQVVRQSKFRHVFGQAEKKEFCYDDIRVTKSSHDSMFCAVNPKFIAVVTEAAGGGAFMVLPLNKVGRIEKDYPLVVGHKGAVLDIAWNPFNDNVIASASDDCSVKVWQIPDGGLFIPLTDPIVSLDFHQRRVALIQWHPTANNILLSVGGDSKIVLWNVGTGDMLKVIECHPDVIFSAAFNWNGSKIVTTCKDKIIRVIDARSGEVVEKGKGHEGAKPQRAIFLKDGSIFSTGFSRMSERQYALRDETMLDDPIVSIEVDTSNGVFVPIYDPDTNLIFLTAKGDSQIRYFEVNMDQPPYVHYVNTFLSSEPQRGLGLMPKRGCDTAVNEVDRIYKLHGNGLVQPIRFYVPRKSDNFQEDLYPPTLGDTPAVSATEWFDDKKDADPTMISMKGYQTKG…	0.43
	A5, 4-10, 15	56	EZ760764	contig12603:1:673:1|similar to Titin (A2ASS6)|Evalue: 1e-28	302	25446	7 (5)	40.2	224	6.18	TTTGHYMVETGERHAVLTIKSGAQEDNGQYRLIVSNELGEDTAVIKVQINDKPDAPRLPFVENIWHDSITLSWKPPLSDGGSPITNYIIEKKEHPSAVWVRAASTRTTYHTITNLNPLTTYELRVIAENVYGASGPSEATPAVMTKEDEMKRRRRKRADMKDGKKQXEGTNEGRVADYDKFVFDVYDKYSKKPVDIKHDSVYQYYDILEEIGVGAFGVVHRCRE	1.37	2.94
	A16, 15-18	94	EZ762202	contig23236:84:635:3|No Annotation	302	20607	8 (6)	26.2	183	8.74	MASVMVILGFCVLAALSSVSGDFVRVEFELRNLTNAGGILANGKSCDTVGQCDPRVTGYIDAVSPMSAWPGSQNLTTFKQIFEATDKNNASIGKIITRDVCGGPRYDRANFRIQVVDVDPFGTEDIGKFECLTDRNIVDRNEKVAQWSRLRNVKQQIPKLIFSIRGECSRFHSRCVAAHRSTQ	1.47	2.55
	A17, 16	79	EZ762351	contig23741:298:1137:1|similar to Pyrroline-5-carboxylate reductase (P54904)|Evalue: 5e-61	301	29626	6	26.5	279	7.56	MSDAEALNRKVGFIGAGRMATAMATGFINSKLCKSSDISASCPPDWDSSDLKNIGIQVFSENSKVVDCSDVIIIAVKPDVVTAVLQETKQNIVAKNSLIVSIAAGISVSAMEKVLSDSRIVRVMPNTPALVPGYGASVIVPIRSVLXDDAMFTERMLSCLGYCSKVPEKLMDAVTGLSGSGPAYVFTMIEAMADGGVKMGLPRDLALKLSAQTVLGSAKMVLTTGQHPAILRDNVCSPGGTTIAGVHELEKGQLRNTLINAVEAATKRSKELGQMSEKS	0.89	1.13
	A16	95	EZ760061	contig06600:153:908:3|similar to 40S ribosomal protein S4, X isoform (Q642H9)|Evalue: 2e-108	300	28656	7	31	252	10.06	MGRGPKKHLKRLVAPKSWMLDKLSGKYAPKPSSGPHKGTECLPLIVMLRNRLKYALTTKEVTAIVMQRHVKVDHKVRTDSHFPAGLMDVVQIEKTNEHFRLLYDVKGRFVIHRITSEEADYKLCKVRNYQIGAKGVPFIVTHDGRTIRYPDPLIRTNDTIRFNLKTGKIDDFAKFEVGNLCIITGGRNMGRIGVIASRERHLGGFDVVHVKDSLGHSFATRLSNIFVIGQGNQPWISLPKDKGVKLSISEER	1.16
	A5, 6, 9, 10	57	EZ761361	contig18759:1:680:3|similar to Extracellular domains-containing protein CG31004 (Q0KHY3)|Evalue: 2e-32	299	25923	6	31.9	226	5.41	QFMVDIQVRMEQPPRAPFGLINATVTRAVAMKENDSDTIEIQAREPHKRWRYRLQILVNGFPRFFDRPWLKLQTFKGVSIHSPENDLAQSIVTVRFPSGIGIEVEEVQGYLHVTTFVPREIQNHTFGLYGNWSGVMEDDLKTATGNELMISQGDRAIYQDFGQSWLVKNQKITGSSLFQYRVYRGDLLLVGDINNQQPWEPQFDVPQQPPPNTTLNMAEVDSLCGI	1.07	1.95
	A19, 18	64	EZ761327	contig18624:208:876:1|similar to Glutathione S-transferase 1 (P46436)|Evalue: 2e-34	299	25396	8 (6)	36	222	7.85	MSKFKLTYFDIRGRGEIGRLLFAAANQKYDDNRIKLETWPQLKTSTPWGQLPVLEVDGKLLAQSTTIWRYLGSQFGFMGQNEWEEALIDSFLMSVVDARNELSRIQFVKGDTEQGAEAKKYKETFIPNELAKFERFIKEHGDTFVVGKQLSVADIALFNFLDFSILHETLKKQDLQQYPKIKDVFERVGQHAPIAAYLQNRPSEAAYAGPVSALKKWFSSTS	1.1	1.95
	A5, 4-7	59	EZ760038	contig06386:752:1527:2|similar to Plasma membrane calcium-transporting ATPase 3 (Q16720)|Evalue: 1e-67	298	28629	4	26.4	258	4.86	MSKGDGGTQDDYPISPHELSNMMRLRGEEARVHIEETYGGAVELCRKLRVNPNEGLLDDADIQKRVAFYGANTIPPKPPKSFFRLVWEALQDMTLIILQVAAVISLVLSFLQFGGDDDEAHDDHNVEWIEAVAILVSVVVVVFVTAFNDYTKERQFRGLQSKIDTEHRIAALRGGHVQQIAVSDLVVGDICQIKYGDLLPADGIVLQSNDLKIDESSLTGETDHIKKGVDRDPTLLSGXARDGRQWQMLVTAVGLNSQ	0.55	1.44
	A11, 5, 7, 10, 17	135	EZ760183	contig07428:1:481:3|similar to Putative cytochrome P450 cyp-13B1 (O17624)|Evalue: 6e-15	298	18412	5 (4)	39.6	159	9.67	HKTVVYSHFRPSYTQWLVCKSVSXPIIAFFKXLGMWIIAVTVLAVAASIWYSIRKQRYWADRGIKGPTPIPILGNFWPFMTKGAGGALYDWSKNYGRIFGYFEGSNPVLVVNDVNILRDIQIKDFSHFVNRRDFDLNGPELEDAVSVLRDQRWKEVRSV	1.32	2.94
	A18, 16-18	73	EZ760154	contig07182:1:437:3|No Annotation	298	15546	8 (5)	49.3	144	8.67	ATKQKSETVEYKKSLKGAPIEVTVKFGKTSTAPAIKGFALRAGIPYPVVQWSAGDDSTVSVASCIAPQSSDTYIVRGNVGDSYTATATPLLAFWDNKKSLPVTYELAIQTANNKIFIGLFNGTIAVRETDYTIPEDFFGPSRPN	1.69	3.11
	A12	136	EZ762642	contig24788:499:1563:1|similar to Carbonic anhydrase 2 (P00921)|Evalue: 4e-38	297	40671	7	28.5	354	8.26	MTKPLPFVLLIFLGLLLIIQSKAKSDRDDASHEKDEKKKNVQDLRHWGYHRHSDEIAPEEWNAKYKKCSGVRQSPIHIDTRNITTDRRLGKLTFVDYDDTPEHEVWTVQNNGHTVTFKAHYVTPPQLQHGGLGAKYMFDHMHIHWGSNDTGSEHIVNKKQYPLEIHLVHKKKGVSDSDAAASGTGFAVLGLFVDIARPEDYVNPYVVTLIDAIEMVSNPNIKANVAMPSFTLSELLPEERNYFRYQGSLTTPPCHEAVTWTVMKQPLRILQHQMNAFRNIYAQSEHKDANTTQTRSRLRLLDNFRPIQPLYGRKVLYFPDDNSNYATRLTSVGQVSTVLLTLLVTILCAKEFSY	0.73
	A9	124	EZ762846	contig25656:4:1527:1|similar to Proline dehydrogenase, mitochondrial (Q04499)|Evalue: 2e-119	296	58572	7	15.9	508	8.07	MSEYRSLNAPSIDGKVADKPSLSPEFPPPSRDPLDLTFSDPKQCYKSKTNGELLRGFFVLNLCRSLWLVDHNMMLIRLAKKVLGKKLFVKLMKATFYGHFVAGEDPERIKPIVERLRMFGVKSILDYSAEEDIDTNAAADKDNATAQVPKPVSDHTDDAVPDNLKKFQQSREFSDRRKGVISARTYLYENEAQCEKNMATFLKCIDAVSGTTNSTGFAAIKLTALGRPQLLMHLSAAIVESRRYFNHVLGAREDDEFIYMRKSKVSNFEEQLSKAGIDLNRAEVKEWLKHIDHNQDGIVDLFDWGDILNQTNKLVALLRVPMPVDRGNFRPLIKNITDEEEEIFHNMMRRLKIITEHAIEKDVRMMIDAEQTYFQPAIHRLTIELMRRYNKEKAYIFNT…	0.47
	A14, 13	96	EZ762333	contig23683:161:1192:2|similar to Protein NDRG3 (Q5RA95)|Evalue: 2e-56	296	39540	7 (5)	23.3	343	5.74	MELTDMRIHMSGEGKDSSGGGDADQQQLTQNENIKEDKFYADESKGWYFHVESIGDPRRVPIITLHDLGLNASSCFHTFFNHPDMQAVSKHFCVYHLTMPGQEENAPTWREGAPYPTLEQMADMMERLCIAHDIQHFIGLGVGAGANILARYAIKNASRVDALCLLNTSSRVAGWGEWSAQKWNNWQMRWRGMTNSSLEYLMWHYFDKYEQSRPDLANFYRQHFSKNVNSTNLALFIDSFINRTDLDIHREPDPQRRRIAPGITCSSLLIACNGSPYLEETIMLNSRLYPEKTELLKVSDADGFVLVEQPAKIAQAFLLQLQGIGYAVTERRLSFEQKQLSFP	0.49	0.57
	A6, 4-17, 19	58	EZ760797	contig13125:303:769:3|similar to Myosin heavy chain, muscle (P05661)|Evalue: 2e-52	295	18257	7 (6)	52.3	155	8.9	MQREDQNRPFDGKKSCWVPDEKEGFVPGEIKGTKGDMVTVSVPKEGDKQFKKEQVQQMNPPKFEKCEDMSSLTYLNDASVLHNLRQRFYKDFIYTYSGLFCVAINPYKWLPIYNKKAVAVFKGRRRNEVPPHVFAISDTAYNNMLMDRENQSMLI	1.77	13.56
	A7, 4-13, 18	83	EZ760552	contig10445:1:469:2|similar to Myosin heavy chain, muscle (P05661)|Evalue: 8e-40	295	17948	8 (6)	26.9	156	7.93	VCVTHSKRSRKAELKFKDNWLKANSEAQAWRAKYEGEGLARTEELEESRRKLQAKTXKKQKENAESANAKVSNLEKVKQRLQGELEDLAIDVERANATATALEKKQKAFDKTTAEWKQKTDDLSSELDASHXEARNYSTELFKMKAAHEEINEQIE	1.81	8.82
	A6, 8	59	EZ760155	contig07192:604:2388:1|No Annotation	294	66845	7	14	594	7.34	MDNTSVASGDDFSQPFRREVYKKLLKVGGYTATRVEGVFASKEENSLMITTGMLPRPNGLKYFLKRSGEPVQIKSGMEFIRVYRYTEARADLTICADQCLTNSLYNLTCTEFGQCSNGNNFVCIPNLTTQLSTQTSGGNSTSGLRAITQDYTCDIYTRISPEMPTDTSINSAFLRIQVATLKGEFNVSVSKDGALYNLTAVSVRTDVHINPDDSISKMGGAVRFELYKSSSTLQESAVKRRFAQLSTAECRNRCANEKGFVCNSVASCAYGDCLLTSYHSDELLTTVNGSTLIKNHTHCAVSTRSWRTKYAHMAIIRPVGKPDRVIEGITNEDACAKKCTFDMESCESYMFCNPLRPQKSESTSSEPGYTCGLFKGHGYDLDTEILNSTKNLGCTYRSK…	0.4	0.45
	A10	124	EZ761650	contig20066:1:1250:3|similar to Lupus La protein homolog A (P28048)|Evalue: 1e-22	294	47219	9 (7)	20.4	416	8.58	CAFTHPASFTDTCRHISGDFSLISSDFTAXNFTSQMAPETEKSTAAIEKPTTATDDASAKHEEILKKIAAQVEYYLSDFNLSNDKFFQEIIDTKDGWVPLTSLLACNRIKNTXSNADDVIEALDRHSEMFTLNRADKSIRRTYPIVKDTDDMKSERDTRTVYAKRFPVGTSMDDLQEFFSRFGRVEGIIQSRFQEGDPKLRGKFKGGAFCVYRTKAEAEFLLALSAEDARLKFKERNIRVESKSAHMSTKEDREKQKKEEIEKSKIAGSVLHISSQRAINDYTTIREFFAKLSPVAYIDMQKGQKEARIRFESGLAKHVLDTLLASNKGELAIGGQKFKGRVLEGKDEKDYFNTYWDTFLESKNNKIMRDMKGIVSKFKPPKPQNDHSSAKTSGESTKN…	0.72
	A11, 7, 19	139	EZ761964	contig22116:1:603:1|similar to Serpin I2 (Q9JK88)|Evalue: 1e-18	293	21832	5	32	200	9.48	PGAGTKKADFKQLDGKTVKVDMMESGLAGFFYSSTADLEYVEVPYLLPNHTAVVIVPKKDKKLDQIEKAMTPDTFTNLAKAAKIQKVLLKMPKFSVRSDLSVKELWKKMGATDVFDAAADLSALTGKRGLFVQDVLQRVQIVVDETKTGATAFTIVQRTTGNPIPPGTKIEIVLDRPFIFGIKAHKTGDMIFLSRVAAVS	1.04	1.37
	A14, 15	97	EZ763063	contig26667:190:1299:1|similar to Adenosine kinase (P55263)|Evalue: 3e-82	293	41677	5	19	369	6.11	MEGILFGLGNPLLDITVNVDLAFLQKYGMNANDAIMGSEKQATLCQDMIEKYKKVEYSAGGSCLNSFRFAQCLIRQPNSVTFTGCIGDDEFGRILVNKATEAGVNAICQVDSTTPTGSCAVLVTGTHRSLCAFLNAASNFTKEHILKSENWKLVEKAQYFYTTGFFLVVSVETLQTIASHCQEKNKTFMFNISAGFVCEFYKESLEKILPFVDVIFGNDAEFTAFAKAFAFDTTDMHEVAKRVAALPKANSSRERTVIITCGADPAFIYSEGKFQEFPVIPTKAEEIVDTNGAGDAFCGGFLSQYIQKMPLSTCMQCGHFALMRSYNDMAPPFRPMSLNFRRNNCVLPKKWYAVTAVLCVIHFSSLCVP	0.47	0.83
	A15	90	EZ762854	contig25681:172:795:1|similar to Elongation factor Ts, mitochondrial (Q9CZR8)|Evalue: 4e-38	293	23516	5	30.3	208	9.08	MRSVNKTALSTLRKRTGYSLQNIKKALEQFGDDIITAEKWLKEQAQKEGWAKATKLQNRVAVQGLIGIQCRPEVGSGVMVEVNCETDFVARNSKFQELVSEISEYCLKELEQMTPQSESSYHKWSLTPEQIANFRWSPGKTLADLTALQIGQMGENMILRRAVLILSNPKECQIAGYAHGADQVTSTRNCLLGRYGALSIYRKTSAAV	0.94
	A12, 13	138	EZ761101	contig17574:138:1355:3|similar to Sorting and assembly machinery component 50 homolog B (Q5U3I0)|Evalue: 1e-50	293	44851	6	20.2	405	6.67	MDSQQMDIIESDTLTRIPITVDKVHIEGLGRTRDVVVERECQRIFAASNFEQLIQSVDGTLKEFRRLGLFNSVGAMIDVTDKSDAFQVTFVVKEPGTMFGSLQTTVSGSGDCGASFVVETPNTFGSGEAIRVEQGFGTKTKSHFSVSYAKPIQQSTVQQVNTSLFRRNALFDASGLNSVDHGFAVDLQRDIATAIRQRVGYEGSWRFVNSIGQKVPYEVRQYSGHSFKSSIIHEIACDTRDHPMLPEYGFLSRVVSEFAGLGGDTKYLKNEIHLQHNVPLPLLAGCSVQSTFSCGFVNSLNGKSMSIADKYFLGSLNVRGFLQNHIGPHMATYALGGNAFWTSAVHLYAPLPFGDPYAPLLRHIRLHSFLNVGNVDNISLNRYGVQSLFSNFPVTVGCG…	0.53	0.77
	A19, 17-20	67	EZ761832	contig21108:1:759:1|No Annotation	293	28255	13 (6)	37.3	252	10.14	GSAQCVLCKSSVSVLVSSLKTARMLTIVCPKMRAFIVYRQFTTSAIRRSAGESATAFSVFPGKPPGSWPPPPPEVNIRLWRKLAAGALAIVAGLSYYMYVIESEHMKYVRRPPYNEHRYAKRIGKDYHSWPYPQYHRAHNPIYAPLAGVGYEVDLPGQDERGGTLHLPHGARIEGVFVPPKNGHLPFIGSFIRGYRRKIRGEKSELEXGEIGRGKKGQKSKEIGAIRGATKGDKRKGMSVDRTDMRTVLQQI	1.44	2.08
	A14, 19	98	EZ759900	contig05513:566:1825:2|similar to Golgi phosphoprotein 3 (Q9H4A6)|Evalue: 8e-76	292	48099	4	13.1	419	6.38	MTDTNGGGLKRRQRGAGATVASGDTDESSQRRDAENLREKNGERERLQASDFVAEEDESYDADADSKEQRLTLMEEVLLLGLKDKEGYTSFWNDCISSGLRGSILIELGLRSKVELEKSGLLTRRKNLLSRKLLVLSDSDERISAGDVLLDEALRHMRDTKPEETIPTWIEYLSGETWNPLKLHYQLRQVRERLAKNLVEKGILTTEKQNFVIFDMTTHPVVDSAVKQRLIKKCQDALLTKWTNNVHKMNRRTLSLLMMANAADVLENALAPLSDEDYDLAMRRLRELLDLDCEQQAQKLVQSLDGIQTGSDGRPSKAHAQVAAGEVMWAVFSAFNKXEDIIPVLLWFGAMFAQKSDRNGRNRVSSGASFRRFDRFLYYFCSFDTVMNKLVIPLQFKRM…	0.3	0.37
	A11	141	EZ759332	contig02305:1073:1710:3|similar to 26S protease regulatory subunit 4 (P48601)|Evalue: 5e-111	292	23996	5	32.7	211	6.7	TGKTLLAKAVANQTSATFLRVVGSELIQKYLGDGPKLVRELFRVAQEHAPSIVFIDEIDAIGTKRYDSNSGGEREIQRTMLELLNQLDGFDTMADVKVIMATNRIETLDPALIRPGRIDRKIEFPLPDEKTKRRIFNIHTNRMTVSDDVNMDEYVMAKDDLSGADIKAICTEAGLMALRERRMKVTNEDFKKAKETVLYRKQEKTPEGLYM	0.92
	A19, 19-21	68	EZ763054	contig26611:146:582:2|similar to Ras-related protein Rab-1A (Q6NYB7)|Evalue: 2e-75	292	16775	11 (6)	44.1	145	5.34	MANMNPEYDYLFKLLLIGDSGVGKSCLLLRFADDTYTESYISTIGVDFKIRTIELDGKTIKLQIWDTAGQERFRTITSSYYRGAHGIIVVYDITDQDTFHNVKQWLQEIDRYACENVNKLLVGNKCDLAAKRVVEHNTAKEYADS	2.01	2.41
	A17, 16	82	EZ761198	contig17993:1:578:3|similar to Proteasome subunit alpha type-7-like (Q9CWH6)|Evalue: 3e-65	292	21639	8 (6)	46.1	191	5.44	KICLLDDHVALCFAGLTADARILVDRARIECQSHRLTVEDPVTMEYISRFVAGIMQKYTQSRGRRPFGLSVLMAGFDDDGLPHLYLADPSGAYHEWKATAIGRNSKTVEEFLEKHYTEEIAANDEQSIRLAITGLMEVVQSSAKNIDIAVMRKGMPMEMLDHDKLEAIVAEIEAEKEKEAAKKKLEQESKK	1.06	1.22
	A11, 5, 8-12, 14-19	140	EZ763041	contig26558:1:1367:1|similar to 40S ribosomal protein S6 (P39017)|Evalue: 2e-92	292	50622	9 (7)	17.4	455	10.21	EYSRAHGSSITYTYGFPRTLYKMKLNFAYPATGAQKLIEIEDDTKLRFCFDKRMGQEVDMDPLGDEWKGYVCRIGGGNDKQGFPMKQGVLSSGRVRLLMGEGHSCYRPRRTGERKRKSVRGCIVDANLSVLALVVVKKGDGEIPGLTDRTVPRRLGPKRANNIRKLFNLSKQDDVRQYVVRRPLPEKEGKKLKTKAPKIQRLITPARLQRKRHLLSIKKRRAEKSKTEAAEYAKLLMQRAKEEKDKKDEAKRRRSSASKSSDKGASPKASLSEGAAPAKKAKVGKTPAKAPEVAQRDAATKRKAAEPEKPAKGKKTAAEPKAADKSKPQTDKSKAGKVADKTKNLPSKELGLKEAPQPGKMKDSGKKPERGVAPPKSDKEPKVTGAGEPKSSTKHQQQE…	0.66	2.35
	A12, 4, 18	139	EZ759572	contig03576:123:971:3|similar to 1,25-dihydroxyvitamin D(3) 24-hydroxylase, mitochondrial (Q07973)|Evalue: 3e-18	291	32162	7 (5)	28.7	282	7.03	MTADDIGTFVEYYNVYVNDKEAHFNDDRRSMNERVKTDNALEKMHGVVRSVLGRRQKVKREPADEQMSDIILKNPKLSSAEKHGDNISLIAGGTGPSANLIKWCIYLLAANDGVQAEVFETIRDKFWDTEPNVEVFNDFPLMYNVVYEAVRFSGTNLFAGRYFDEPRKLGGYEIPAGTPIIQLLGYPLSDETYFAAPNEFHPDRFLKNGEKTRFGYAFKPFGFAGHRMCPGKMFVVHQAFVTLLVLLKKYQFGLPAEQGVVAKNDSVMRPRGEFLVTVRQRT	0.63	0.83
	A15	91	EZ760314	contig08407:69:1061:3|similar to Sideroflexin-3 (Q9JHY2)|Evalue: 3e-106	290	36574	10 (6)	23	330	9.47	MDYLSEKPVQPKSINIDVARWDQSTYSGRAKHFFTITNPLNLLKSDKDLQEARAIIENYRKGRIQPSVNAEKLWEAKHVYDSAFHPDTGEKMFLLGRMSAQVPSNMLITGMMLTFYKSVPAVVFWQWVNQSFNAIVNYTNRSGDKPISNQTLGTAYALATTGATATALGLNALTXKKMPPLVGRFVPFAAVAAANCINIPIIRQKELVDGIPVLDKNGNRVGQSTEAAKWAIVKVALSRIGMAVPGMVLPPILVNYLEQKTTFFKRYPWAPAPLQIALCGACLVFATPLCCALFPQRSSIAVKDLEPEVKRQALSAGLSAEDHVSYNKGL	0.84
	A7, 4-19	85	EZ759329	contig02295:455:757:2|No Annotation	290	11684	32 (5)	52.5	101	6.82	MRFTLFILFSLFLGGCLSAVTRGQPGKASEEQYRHEHEEQWSSVYPQLRQAKYNDVKSFEDGKEFKYLYEGQILTGMPDTHQQYSGLRIRAIVNIQIGAAN	12.28	58.29
	A14, 13-15	99	EZ763116	contig27028:1:974:3|similar to Adenosine deaminase (B2T672)|Evalue: 3e-88	290	36200	6 (5)	27.9	323	5.1	LHIHIDGTLEPEMAFAIGARNNISLPYPDVDALKKAYNFTNLQDFLDILDVVNSVITYKRDFYEMAIAYMHSITKQQIRHCELLFAVSTQIARGIEIETLIQGFNDALEEAEARYGMTGSLIFGFLRHESEETALGIFNEALPLFAKYPRLNAVGLVGAELGNPPSKFKNLFSFAKSIGLKVAIHAGETGPASYVQDAIDNVKTDRVDHGIHAIDDSNLVKRIAKLQMPLDVCPLSNLRLKVIGHLDQLPLLQFLDAGVLVTISSDDPAFFGGYLQRNFEAIIDTFDLDDQQLYNLICNSFKASFVTSQRKSALIGELNNYWF	0.55	1.06
	A9	127	EZ761695	contig20257:1:421:2|conserved hypothetical protein [Culex quinquefasciatus] (XP_001846665.1)|Evalue: 2e-09	290	15408	7 (5)	53.2	139	5.76	LGLIRWVDKLLSEKRKDVWFVTTSQMLDWVRHPTKLNNLGSLDSWKCPGPVDPRAVCKKANGCALDGANDQMRSGYMVTCAKCPSFYPDLNIPDGEVLVIDETNSPKVGNALTSAATPTPDIGARQLTLDDTSANVQNA	2.3
	A11, 16, 18	143	EZ759479	contig03101:248:1753:2|similar to Serine/threonine-protein phosphatase 2B catalytic subunit 3 (Q9VXF1)|Evalue: 0.0	290	57532	8 (6)	15.2	501	5.7	MAQSNSSTMRLSTTERVIKTVQEAPPHRLSMPEVYDLRTNRPRPEVLKHHFIIEGRVEESVALRIINEGAALLRQEPTMIDIEAPVTVCGDIHGQYYDLMKLFEVGGDPATTKYLFLGDYVDRGYFSIECVLYLWALKICYSETLFLLRGNHECRHLTEYFTFKQECKIKYSERIYDACMDAFDCLPLAALMNQQFLCVHGGLSPEIHSLDDIKRLDRFKEPPAFGPMCDLLWSDPVEDFGNERNQEHYSHNTTRGCSYFYSYAASCDFLHHNKLLSIIRAHEAQDAGYRMYKKSQSTGFPSLITIFSAPNYLDVYNNKAAILKYENNVMNIRQFNCSPHPYWLPNFMDVFTWSLPFVGEKVTEMLVAILNICSDDELADENADAEGLTPAVRKEIIKN…	0.48	0.91
	A12	140	EZ762538	contig24406:139:1015:1|similar to Protein DDI1 homolog 2 (A2ADY9)|Evalue: 9e-40	289	31797	6	30.5	292	5.21	MQITFTTVAGAMTTLDLPDDIPLADVKALCELEFQIPKKELGFVVSGRRVTADDQKTITELGMNNQDIVLVERLPMATPSVPAVGESVVPFIDFSAIPVRQSKGAATTSRVSASSSRNPVPQIPAFTSNAAAELSAARQFVDAIKMAVSNPETKSNLMATQPELVNAALNDDYTTIARYLRSETEAKLRHQQIMANPDSPEAQQLIQEAIRRQAVQENFEYAVEHAPENLATVHMLYINCSVNGLKMKAFVDCGAQITVISKAFAETCNIAHLIDSRFQGVAVGVGSQRIVG	0.64
	A13, 4, 12	115	EZ762276	contig23476:1:1200:1|similar to 26S proteasome non-ATPase regulatory subunit 6 (Q15008)|Evalue: 7e-121	289	47212	6 (5)	14.8	399	8.77	KELKWKVDDKQLSTMRQNNETKLKELDASIADADQNLGSAEVREAHFAKFNYLVRIGDKEGAESAFRLCYEKSVGHGQRLDLIFQMIRLGLFTNDLDLTTRNLDKARSLVEEGGDWDRRNRLKVYEGLYYMSIREFAKATTNFLDTVSTFTCYEILDYETFIQYVVLCGMLTLERVNLKAKVVRCSEILEVLHSLPNLRKYLTSLYESHYADFFKSLAEIEQQMKRDRYWYPHYRYYVREMRILAYNQLLESYQSLTLEYMATAFGVTTQFMDRELSRFIAAGRLHCKIDKVNGIVETTRPDNKNRQYQMFIKQGDHVLNKIQRLSRVINVXSSGHLTFTAXPQLTFTDVVTTVEARFWLDLVHKIMCLSTELRVGFTLQFVALIKQKWPNLCTSRWST	0.5	0.64
	A11, 10	146	EZ760989	contig16741:1187:1707:3|similar to Formimidoyltransferase-cyclodeaminase (Q9YH58)|Evalue: 4e-32	289	19005	7 (4)	38.4	172	5.24	CRMVGLLTFGQKKFEEFDADMRRLIPIFHNAMQSLLPLIDADTAAFTKVVEAMQMPKASDEEKSAKDAAMQAAVEGAIKVPLATAEAANAVWDALRELAAIGNFSALSDLKVGAKCLETAIHSAVWNVQTNLREFKNEPKSMEYAAQCQQLMTTSTQGLNDVLRILDQRNVA	0.92	1.1
	A16, 19	99	EZ759637	contig03920:1:710:3|similar to Ras suppressor protein 1 (Q5E9C0)|Evalue: 6e-82	289	26885	7 (4)	31.5	235	9.04	DLSYITRLFLAHNKLKAVPPGIAQLANLEILNLYNNQIEELPTSLSGMQKLRILKLGMNRLWSLPRGFGAFPALEVLDLTYNNLNERNLPGNFFGLQSLRALYLGDNDFESISADIKNLQNLQILVLRDNDIGCLPREIGTLQRLRELHIQGNRMQVLPPEVGSLDLIGPRQLFRLEDNPWITPIYEQLQIGLVHMMDLLRSANYHSIYNNHMQSGAGVPPRNLDKSRKQSRRKD	0.8	0.92
	A7	86	EZ759191	contig01610:1:1072:2|No Annotation	288	39561	5	18	356	8.82	SIKKVDCTPSDAWVPVMRCDNRKSGTESTCKYEQQIGTAVISGSSSAERKMTENSASITVGGEQGSEALGYKVEFSATLGVSKATGLDWTKGQEKSFTSVHTLASEWKVPPHGYKELRQIIGTCGGATVATPNFTLVDVGTPNPSVPGAGLNGKRCVTLTDEQVRALSSLFPENRPKNNTFCRPEPSTTASPAATTLVPEYDDTQYYNASRNWIVNGKQTLKGGIEKYGEWYKVGKFCPEDMYVYRMIIKXGSRTNGGDNTAIIPSPFMCTTRGYEPQAEVRAAKVPGGGWGKWMECKDSVMTGISVRAGGVRGRKAWENCRSVGVGLFSSQQCDEKTYHDGENRCQQPERLVRRW	0.49
	A12, 13	141	EZ759290	contig02123:143:1432:2|similar to Monomeric sarcosine oxidase (P23342)|Evalue: 2e-50	288	48812	8	24	429	6.07	MNRTENNHYDVIVIGCGGIGSAALYWLSKMGKDRNLRVLGLEQFALGHVNGSSHDVSRIIRYLYWDPAYIKLASGAFAAWKEVEEESGLQLVYMTGGVLFTLRENDSIDLVDEYIHAMDVCGVKYEMLDGPALEKRFPQFKVGQKNVYGFYQEDSGLVHAELCNAVHVQLARSHGAQIFDHTKVLNVTKEADDKYVIATEKGDYTCRHIVMSTGAWNNDMYRLFGFQLNVSVTQEQVSYFATPNIKEFTKSKFPVFMYYGKGIEYYGIPMHVNSGLKVGLDAEGHPVSPNDRTFDIDPVREQISREFVKEFLPDGYGPIMHSKTCLYELTPDRHLILDSLASKGHPNIYSFMGCGHGFKFACVVGKIFAQLILTGKTEYPLSDHFKIDRKALEPTSNLR…	0.69	0.76
	A12, 10-12	142	EZ763182	contig27472:84:670:3|similar to Vitelline membrane outer layer protein 1 (P41366)|Evalue: 5e-18	288	21982	7 (3)	26.7	195	8.17	MAIVLASLLIFLSALXPASFRSRTGQTEGSRRSKQAPTNGGEWHEWEFCPNNTYVYGMQLRTEAKQGKGDDSALNAVRLFCAPLGIITVRIDRELRWSXGENGGKCSLQQSVMQGIDVREEPEQGSGDDSAMNNVRMICSNQQVIEGDGQTWGSWLGERKXPEGLRCMWYKSGVRKNQGNGDDTALNKVRLACCK	1.03	1.94
	A18, 17-19	78	EZ762153	contig22983:1:456:1|similar to 60S ribosomal protein L10 (O61231)|Evalue: 1e-46	287	17572	8 (6)	41.1	151	11.24	RINKMLSCAGADRLQTGMRGAFGKPQGTVARVNIGQPIISVRAKEQHRKEVIESLRRAKFKFPGRQKIFVSKKWGFTKWDTKDYEELRAAGRLVPDGVTVQYRRQHGPLDAWIKERRAQEAXVTTRTTDHSHRWILRQFLVLLHQRQSKVA	1.88	3.32
	A13, 13-18	117	EZ760250	contig07935:1:901:2|similar to Cathepsin L1 (P06797)|Evalue: 2e-25	286	33562	8 (5)	18.1	299	8.87	PLSHLSKEEKKQGLFGLKPRPNKNKGNKTRKMSNRIPGKPVDDEWANWLPFPGEPANNPRPAAMDWLGMGKVNTPGYTQNPCGSCWAFAGAAVIESHYLLRYGKPIKLSEQFIRDCAFDGNYATSSIVPCEGAYLETAMQLASEAPIPSITDYPYQLDDRQRKCPLGKPGYKLDITGIARVEGEAEMMAALRTVGPLVVAMDADEIAQDPQWFNWNGQNPNVYPGQRCTANTNHAVTLIGYGTDAKYGPYWTIRNSWGPKWGNKGTFKIPRGRCGIDYGVYPCFANQCHHGKIILQASG	0.76	1.38
	A9, 11	131	EZ762837	contig25595:1:302:3|similar to Lysyl-tRNA synthetase (Q15046)|Evalue: 2e-26	286	11540	9 (7)	71	100	7.15	YFKYRVEELEILKAKGHNPYPHKFHVNMSLTEFTEKYANLDDGQKHTDVVSVAGRVHSKCEAGAKLIFYDLRGEGTKIQILANASNYKDEQAFTLINERV	7.06	7.36
	A8	111	EZ759505	contig03265:1:795:1|similar to Serine/threonine-protein phosphatase 6 regulatory subunit 1 (Q9UPN7)|Evalue: 4e-16	285	30617	5	27.3	264	5.27	FKYFEDNDVLNPILTXFLTRTFGLLISRKPWDFLEFLMPRNGSWFFDITLKHINITAIADLYIRLMTACDNEPYRYRIAEYLNEGGLLPRLLTFLDIEKTSDATSHMNAAQLICDIVRFSREQQLQQLKPTDVIDSLTSESYANNLLKTFDNEAFLGQVIETLVKSAHSQSAVVNCLTILGAPFEFIPVNFERVTTKKSLSSELSLRIVNSRIDXILEIIPTRDSETTRTAEEPTDELSLMHKWRPESPMLQERVGQTRIRSRD	0.67
	A15	93	EZ761654	contig20073:1377:1828:3|similar to Dehydrogenase/reductase SDR family member 11 (Q3U0B3)|Evalue: 3e-14	285	15984	8 (7)	66.4	149	9.3	MQANGRDEGHLIIMSSMAAHKLPLRPNMHFYSATKHAGKAVGDAIRAELTAMKSKIKYSHISPGPVKTDNLMMNWSKESGGDAAKATAALEPLAVDDIAKAVVYTLTAPSRVTIQDLILTPSAGAFAQSNGPQKTQQEQPQSQQRPSCP	3.66
	A15, 13-16	94	EZ763024	contig26455:147:911:3|No Annotation	284	28119	12 (6)	29.5	254	5.92	MSHTVEKTVVQETRTVGSNADYSSPNVTYMNCPTTGGQCITTCSTEHTHGAECHTHAHSHSDVQATSTLHTEIRTPIIAPAAPVMVTSTGVASEIIGESMTASASRISSSASQAVVAEVPLEVRRRDQEAFDREAAAIAARAEHDIAKKTEQYRKETEAQAERIRKELEKQHAKDIEFRKEILEDTIARQKREVELEAKMAKRELDREAAAAREALDRSKLATDISVSIDTAAGHTVATETMKSTEHTFSHQRM	1.19	2.44
	A10, 9-11, 15	127	EZ762385	contig23862:1:441:2|No Annotation	284	15781	5 (4)	32.2	146	5.07	DVVTVVKKPVEVESAKVAADITAALNAALAKLPAKAFLEAHPNQLSEIITALDTTKPLKPGHVVAKPVTDYEFVLPHGKTVNDYVVATLKDFKIAGSDEAKIKTDLIAAFAKTIEDLKTEFPAPAVENVEIEKNLLELETLLMQNF	1.65	2.31
	A8, 7, 16	113	EZ763292	contig28105:87:1105:3|No Annotation	283	37870	12 (5)	20.1	339	5.46	MAALGRSYFALLFLCFITQAIQAKVNIPDTSEPTQGSQNSTTQPTTAFPDNSTYRLDTKSAENSTDTDNTKVAETSTDAASTGLAYTSTDLFTTTTADITTEQSDVGSSENITSIPWQLINEYKNFSNSSLESEWRNVPGPVSGQKQEFMNSTDNVFARNGTLIVKAIKQGDRFPSGRVRSKMNYTVTDTPHKRIRIEVTAKLPTLPGASPTVSLQGESTAYHNDRFRDRPSAEIFFAGWRQEDNEDVTRSLELSGPGITNVAKLEDGLSYNDSITYGVELNNKAKQVYVRFYILKNGTQTMVRTYRPAVWRRYRPLCGERVAEAAYCSYLAPFDQEMS	0.52	0.9
	A19, 17-21	72	EZ759316	contig02240:94:701:1|similar to Glutathione-requiring prostaglandin D synthase (O73888)|Evalue: 2e-13	283	23181	18 (4)	23.3	202	4.6	MADYKLFYYRNRVRTELIRLIFAAAGEQYEDIALDGGGQFPQNFRPPITSGTLPLLQFGDQYLTQSMAIARYLAEEFGLTSQNRFEQALIDSVVDAVSDVLVDANDLLNSDNDDSRDFYQKRINERSLPELLSSLDRFHQQHSDGQSYIFGSNLSYADLAVYNMIDWFTNKGIVDHSTFDSYDYTRNIRHALEGTPRISNFL	0.96	2.51
	A11	152	EZ762424	contig24043:1:1018:1|similar to Adenylosuccinate lyase (P21265)|Evalue: 8e-140	282	39192	4	19.5	339	8.05	GDDIGEARPNDARSRYQSPLSLRYASDEMCYNFSERRKFRTWRQLWIFLARAEQALGLPVSFQQIKEMEQHIDDIDFEFASKEERRVRHDVMAHVRTFAAVCPTAEPIIHLGATSCYVTDNTDLMCIQRGFVILLPKIARCIQRLSKFANANKNVATLGYTHLQPAQLTTVGKRACLWLNDLVMDLKAMEKAKENLRFRGVKGTTGTQASFLELFDGDSEKVRMLDTLVTEMAGFKRNFIICGQTYTRKLDIEVVSVLSSLGATVHKICTDIRLLASFKEIEEPFESDQIGSSAMAYKRNPMRSERCCSLSRHLMTMVSDTLQTLAVQWMERTLDDSAN	0.38
	A16, 15	101	EZ761781	contig20760:1:720:3|similar to Chitinase 5 (Q7Y1Z0)|Evalue: 2e-19	282	26836	6 (5)	25.5	239	8.73	KSGDTCWQLGQTYSTSVDEIEKLNPGINCGALQIGQSVCVSGSSSPNPAPQPEPQPSGTPLITQAEFESAITVNKFPKPTVEQYKNVVARAGPAGGITTKRELAMFLANIIQESGGLKYKKEITPQEYPHPALDKPGKKYYGRGYIQLTWSYNYKDASQALYGDDRLLNDPDQVANDDRIAWDTAFWYWKARVHSKPGVSEGKFGVTTRAINGGECTTPNDQRPRNRYRFYTEIYKVFK	0.8	1.6
	A9	132	EZ760330	contig08496:44:1342:2|No Annotation	282	44621	6 (5)	15	432	5.1	MNLLATVLFAFTLTIQSSYSENCFTTSNCIDSGTVCISEGKVVFTEGQDAAEANVRYVARDDIYSPPTDSEILQRGAGITDFQPAIQADSVDMQADPEAPIAEPLNDSPNASLKIKPGVAVRGAEDTTSIRVGSILKISGWKCVVIDIKVADAPTGFVLASEAQSDSIDLNSTVAAAAAPQDDTSKFATKLGEGKVVALGRIQCKVIGLVANQTTKNSNTSAVNSAGSGQLNTGTPANVPSPIATQPNTPTVSGTITGQNNILPPGISGSRSGGLAPVISVTPPPTVDATTRSRIIAPINLSSGGAAQGSTNTGAIVPTIAGSSPNAGVSNVNTGTSNAGVSNVATGLSNVSSGAVAQSNNSGAVSSSKIGQCQCNEDWRFACNSASECSQRFGIPEGQ…	0.43	0.86
	A11	153	EZ761551	contig19578:1:925:2|similar to PPPDE peptidase domain-containing protein 2 (Q6GLM5)|Evalue: 3e-05	281	34730	6 (4)	17.2	308	4.6	RSTKYHFLDYNSNAFCNEVTQFLTGKSIPLHLLKTPTDDVITANRSGEQQLRVLLDQLANSGTALDVIGASFVPRAPLFDPEEEALMQAAHDAINKPMPRATPMPRSADLSEDELDSNDVFTSERESKPMATFENLDVTDAYAQLQKALKAIMPPEDVDLLDEIFEYATTTDENALLISISRNHFAFISDILISDELQPFVKIQAVKLLQVILRNSNAINVIRFSPEHPVMEYLLLLTKQRTPDAAELLEALKMVCNACTTKSGLNWLVDEREWSVENSNVETFNLKISTEFCVWALSNKSKDVQDAA	0.58
	A14	107	EZ762866	contig25734:1:558:1|similar to Eukaryotic translation initiation factor 3 subunit I (Q16K15)|Evalue: 3e-51	280	20518	4	30.3	185	5.66	KLECMDSKITSAVWGALDETIITGHSNGDLSLIQMREKDWGITKTADPTFIXDKGPQAHTATVTDIQKSKDDIFIVSASKDTTAMLFDSMTLDHMKTYKAGRPVNSAAISPIRQHVLVGGGQEAMEVTTTDVRQGKFEARFFHMVFEEEFARVRGXLWPINSTAFHPSGRSFATGGEEVMCVYTT	0.83
	A15, 14-19	95	EZ761069	contig17438:108:706:3|similar to 60S ribosomal protein L7a (Q4R5C2)|Evalue: 1e-71	280	22716	11 (7)	29.1	199	10.78	MSTVKQTKPKGATAKGGKKGAGKRVAAAPAIAKAKDTKPKREVNPLFEKRPKNFGVGQDIQPKRDLTRFVKFPRYVRLQRQKRILYQRLKVPPPINQFKLTLDKQSTTQLMKLAGKYRPETKQEKRERLKKRAQKRAAGKEDQPTKRPPVIRSGVNTVTNLIEQKKAQLVMIAHDVDPIEIVLFLPALCRKMGVPYCIV	1.62	3.6
	A11	154	EZ759542	contig03446:388:1608:1|similar to Kynureninase (Q1DDU5)|Evalue: 6e-104	280	45903	6 (5)	20.7	406	5.58	MPSSRLNDDREVSKWQETGVCGHHYGEMPWVKCADEANESMARLVGALPTEVTVMNGLSVNLHLLLVTFYRPSTQRYKILVESKLFPSDYYIVASQLQYHGYDTSAMIQVEPRTGEDCIRNEDILQIIEEQGDSISVVLFSGVQFYTGQLFDMPRITEAGHAKGCIVGFDLAHAAGNVKLDLHKWDVDFAAWCTYKYMNSGPACLGGIFVHEKWSEPSMLVHGQPVCKFEGWWSHRLETRFAMNYKIDQNAGAASYNISNCPPFQVATLLGSLKVFDSVPFDKLLEKQRVLTGYAELLLETTFNRGSAENGHSYTNGSTHENSDSRSLIQIITPKDPKERGNQLSLKVDTSVAALSGELARRGVVCDVRNPNVIRIAPAPLYNSFNDVYRFVEILKESL…	0.41
	A12, 11-13	144	EZ761433	contig19036:1:1513:2|AGAP009479-PA [Anopheles gambiae str (XP_001230737.2)|Evalue: 1e-20	280	55398	7 (4)	14.5	503	7.98	ALLTTGQSSPFNSGQPTNAQYGQLTTGQNGQLSTGQTGQLTTGQTGQQTTGQNSQLNSGQNAQVTSGQSGQQNSGQQIPERSWLTAFGTQSMXAATSGQSPNYAQYGQTQFMQSLPSNQYVPAQSGQYSPVQTAPTQQLTAAAAAQAAIQSAIAQGANPNNFGIPTGARFTIATAPNQQIPDVFSALETLRGRPTLGIEDLINILVSAVPTKDYPAFNEVPNTNFRCERVKQAGFYADTETQCQAIRRCDLNGIMWTYLCPNMTVFNQITLVCDWFFNVNCPTSAQYYDYSNPRLYTQFPLFDTPINQVSSVNYGAYTGFPYGRSLTTGAQVSAVPSQQTAVGSVXAGDLSSVAICELNIMQLCISIEWSKDRFCTFCAPKNVSDFESFPCFVRNDSKE…	0.41	0.65
	A10	131	EZ759294	contig02152:1:1564:2|similar to Acyl-CoA synthetase family member 2, mitochondrial (Q0P4F7)|Evalue: 1e-125	279	58734	7	17.3	520	5.64	ELKEDVDVCASGLLQLGVTCGDRVGIWGPNSYEWIVAQYAAAKIGAIVVTINPAYKPQELQYCLSKVQVKVLIAAEGNKSQDYYEILEKVYSDLSRAPSDHLNCPVLPNLRNVLMFSKKERKGVLRFEDIVNMGHQQKNRDELRQIQQNLRIDDAINIQFTSGTTGSPKGATLTHHNIVNNSYFAGNRLGLGKAQDTSICLPVPLYHCFGLVLGVLMAVNYGATLVLPSPQFDVSATLQTINDEKCTTIYGVPTMFADMLSFLSEKYDTKSLRQALISGAPCAPTLLKLMNEKMHIKDVHVGYGMTESSPLNHLSFAAEPSEITLNTVGYCLDHTEVKLVDGEDRIVEIGKKGEILTRGYSTMKGYWNDEEKTKECITDTFWMRSGDVGVMDENGYLAV…	0.46
	A12, 13	145	EZ763008	contig26394:1:212:3|similar to 26S proteasome non-ATPase regulatory subunit 11 (Q2KI42)|Evalue: 4e-17	279	7673	5 (4)	76.8	69	5.22	INLPQQIVEKKLSQMILDKSLPGILDQGQGVIVLYEENPVDKTYESGLESIGSFSKSLDVLFQRAKKLS	5.66	6.12
	A9	134	EZ759209	contig01718:85:1824:1|similar to Acyl-CoA dehydrogenase family member 9, mitochondrial (Q9H845)|Evalue: 5e-64	277	64781	5	10.7	579	6.1	MVLARSVKRVILGSAASRLPQKYFTRNQVANTGVVGVRETRNYNDEFEIIEKQTKELLEKPKVARPPFLKHAFDGKVETIFFEYPEILMDDLKDLLAIIKPVEDFVKEKVDPNTIDERTEIPSDILGQLKKMGAFEGQIATEYNGNNLDNIGHTRMVEALSANGNITLGMLAAAQQNWATKLINKFASEEQKNHILPLIASGDAMVSAALAERESGMDMALIKTSARIGADRKGYFLNGTKAWVTNAKNAKYFIVTAKQRTTAELDREKSEPKPTLITTDQEELDESERYAEKAGSMTAFLVPRDAPGVTIGEAVLFTGLRGLAVSEVTFDDVALPNDCQLGSVGQGFMVAMDAYYTERHVYATTVLPLLRDLISKAVKYANNRVIMRRPLMENHMIRE…	0.28
	A12	147	EZ763141	contig27193:192:1466:3|similar to Cytoplasmic dynein 1 light intermediate chain 2 (Q6PDL0)|Evalue: 6e-83	277	48003	6	20.3	424	5.38	MATVEKLKETFKDTKNETENQWALVLNEVRERSSNRLTEKNLLVVGERESGKSLLINRILGTERPATSGIGLEHLSMTVKDDEREDSTQVNAWILEEEDFAANLLPFVLNESSFGKSVICIVVSMARPWLIMRSLDKWINIASKAIDRLKLNPSLMKTYTDNLEKQFRSYVDPSLSRTEGFSGEKDPEMPLGDNVLTYNLGIPIVVIVSKVDQMSLLEKDFDYKDEQFDFIQLHLRRWALKYGASLVFTSAKENKNVQLLYRYLTHVLYGLKFDESAFVLERDSIFIPIGWDNEKKISILYDTFGGTEPTEPFEAVIAAPPMHVKTHTTDIESQAEEDQEFLKRVKQTLDQPTPTRNESPAVPKNPPERRPSPSQTSPRRPDGPRGSLTGTGNASNEST…	0.49
	A17	87	EZ759549	contig03470:1:696:2|No Annotation	277	25553	6	26.8	231	5.27	GVALKVVGMLMSVALKIFEHSSAQGPFALEFRTAKDTDRNEYGGDLPKILLLKNFNEDDISTTPGDRGRGDTNALAYKXNFYYEHFLKGRLNERLDDGSYKAVAMSPRGNAIPGALYLEAGGDNAICIAYVGWSGFNIKGVVIGDLWEKCKGGDFGGRTTEINGNSIRCGWLDGNKEQNIDTQAVLIDVNYFSQGDRMNDDNVCDHIKFYSTPRIQPCSCDQGSAASAKFG	1.09
	A12, 11	146	EZ762566	contig24495:1:615:1|similar to Sorting nexin-6 (Q5R613)|Evalue: 3e-57	277	23997	6 (5)	27	204	8.32	DVDDFFEHQRSFLNEYHTYVKDGAKKSDNLVNDHKSVINDHVKISSAMSQLGASENDSLSKFLSELSDVFEKTRKVEFKKAADHDLKMSDTLFYYQRETQAAKDLCLRRSRCLHDYEEANKNLEKARTKNKDVHSAELHRENCQKKFEKLSELAKSELRDYKNRRVVAFRKGLIELAELQLKHSKTHYQILQTSLEALTGVKQE	1.19	1.33
	A18, 17-19	83	EZ761485	contig19251:1138:1617:1|similar to UMP-CMP kinase (Q29561)|Evalue: 3e-40	276	17483	10 (6)	45.3	159	5.84	MDTSALSTSSGDASAARVKPKVVFVLGPPGCGKGTQCSNIVSRLDYVHLSAGDLLRKEVDTLDSKYGKTIAEDMRNGKIVPVEITCALLENAMAESGKDRFLIDGFPRNQNNLDGWTRQMGEKALVQFVLFLTTSEDICVQRCLERGMSVVAAMTMSSL	3.09	3.47
	A6	62	EZ759936	contig05781:891:1874:3|similar to Dihydropyrimidine dehydrogenase [NADP+] (Q6NYG8)|Evalue: 1e-158	275	34996	4	18.9	328	5.2	MLPLFYTAIDTVDVSVEMCGLKFPNPFGLASAPPTTASAMIRRAFESGWGFALTKTFTLDKDIVTNVSPRIVRGTTSGHVYGPGQGSFLNIELVSEKTAAYWCQSVAELKKDFPNQIVIASIMCAHDKGDWTELAVMAESAGADALELNLSCPHGMGERGMGLACGQIPELVRDISRWVKDATTIPVFIKLTPNVTNIVDIAMAAKEGGADGVTATNTVSGLMGIKTDGSAWPGVGSAKRTTYGGVSGNAIRPIALRAVSAVKKALPDLPILATGGIDSAEVGLQFLQAGASVLQICSAVQNQDFTVIEDYVTGLKTLLYLEALEQCR	0.44
	A12	149	EZ759303	contig02178:397:983:1|similar to Endoplasmic reticulum resident protein ERp44 (Q3T0L2)|Evalue: 5e-41	275	22156	7 (6)	34.9	195	8.2	MVSVAPLPFTLMVCFFLSITSAAVIDLGKNNIDKVVQDNAVVFVNFYADWCKFSRLLAPIFEESANKISEKLPPGKVALGRIDCDKESDLCAAYHVTKYPTLKIWRSGQIAKREYRGQRSTEAFVTYLQEQAKEAILVLNSAADVETPDKKEKKRSIVLYFAGSQSPHLQNLQRMAAYLRDECPFYVLYGAASEA	1.33
	A12, 11	148	EZ762873	contig25768:1:505:2|similar to Tissue alpha-L-fucosidase (P17164)|Evalue: 5e-54	275	19538	8 (4)	25.6	168	4.85	EYLKFMADNYRPGFTYGDFAPMFHATMFNPTDWAKLFEAAGARYIVLTSKHCDGFALWPSTAAWNWNAMDVGPHRDLVGELMTAVRNTTTLKFGLYHGFEEWFNPLLLADVAANFTTRTFVERKIMPEFYEIVNKYQPDIVWGDAPDIASNDYWRSTDFLAWLYNESP	1.6	1.97
	A16, 15-17	104	EZ761105	contig17585:1:663:1|similar to Glucosamine-6-phosphate isomerase 2 (A4IHW6)|Evalue: 7e-106	275	24886	8 (6)	34.1	220	5.84	KYVKTFNMDEYVGLPRDHPESYHSFMWNNFLKHIDIEPRNAHILDGNAKDLNAECAQFESQIQEAGGIELFIGGIGPDGHIAFNEPGSSLTSRTRIKTLAKDTILANARFFGNDLTKVPTMALTVGVGTVMDSREVMILITGAHKAFALYKAIEEGVNHMWTVSAFQMHPRTLFICDEDATLELRVKTVKYFKSLMYMHNRLVEDSDNKLSLQSQLSMEG	1.13	1.39
	A18	84	EZ760092	contig06795:1:925:2|similar to Ras-related protein Rab-3 (P25228)|Evalue: 2e-104	274	35240	5 (4)	18.9	307	6.35	IAFAYQRTYGQTDGMTHAHSTHSTLCIVKPIHRHQCTIXYWILLVESHKLPLTYISQLSFEXIFRVIRSVEKTPVEMNQATGSGNGKWQKDAADQNFDYMFKLLIIGNSSVGKTSFLFRYADDSFTSAFVSTVGIDFKVKTVYRNDKRVKLQIWDTAGQERYRTITTAYYRGAMGFILMYDITNEESFNSVQDWCTQIKTYSWDNAQVILVGNKCDMEDERVISYERGRQLAEQLGLEFFETSAKENINVKAVFERLVDIICEKMSESLDSDPTLVGGTGGQGKAGVTRLAQGDQFSNKPSTTQCQC	0.43
	A15	99	EZ762639	contig24779:1:327:1|similar to 3-hydroxyisobutyrate dehydrogenase, mitochondrial (P31937)|Evalue: 6e-38	273	11843	4	64.8	108	9.23	RLGLDPKLLASIINSSSGRCWSSEIYNPVPGIKEGTPACNEYKGGFMSSLMSKDLGLAQNAAINTMSPTPLGSLAHQLYRIMSSKGFGTKDFSSAYQFLQEQQTQNKK	1.76
	A17, 18	89	EZ761671	contig20143:1:572:3|similar to Phosphomannomutase (Q1W376)|Evalue: 1e-70	273	21863	6	30.7	189	6.06	AKEFDFLFSENGLVAFKNGTLIHEASLQEFLGEERLQQFINHALRYLSDVNIPRKRGTFIEYRKGMLNVSPIGRACSQTERDEFFAYDKIHHVRDKMVANFREHFSKMGLVFSIGGQISCDVFPTGWDKTYCLRHLESEGFKTIHFFGDKTSVGGNDHEIFEDHRTIGHTVTSPEDTVKQVASLFFESS	1.35	1.88
	A12, 18	150	EZ760627	contig11237:1:893:3|similar to Signal recognition particle 72 kDa protein (P33731)|Evalue: 4e-20	273	34322	6	23.2	297	7.66	KESKEQELSTLFVSLTRAYNNEEFDKGLRLATQILKSSADDQKALRCKAVCQIQLSKFSEALETLQCVEEQSSVLLETCYCYYRLNRYEDIMALLTDTHDLTLELKELKTQTLYKLERYSECLELYKELLKRQRDDLDSERQSNFLAVLTQLQTSKASVVPAFQASATETYELLFNSAAFEMAKENLSEAEKHLRRAEEAFYKFAEEEQLKPEKIKSEKSLIKAQLLKIAINKVKKQSSEKPANFNLESVEGNFWSQFVKLKKKPKKDSSVPEVATPKATPKAKSKAAKDSTADVNT	0.74	0.94
	A14	108	EZ759764	contig04693:206:1270:2|similar to Ester hydrolase C11orf54 homolog (Q6NWE0)|Evalue: 6e-68	273	39614	6	23.7	354	5.11	MVEEYAGDVGEVMMLATEEASEASEMAALRSAKHTTESHLLDKHALNTPDXGGNISVLQRTLESNFANVEVKVVTCPDLTTAPFRMAAKGLGGTTRLVDVGGVPYLTPTPQLTHKYDFKDIAKLVDCESGCFILGAGAGPFHKVGCNCELMANVYVSPEKGTQNLSRIALLDKEDXNEANCAFSGLYGIWDFRQFFACKGDTGAVIQVRVKQRTGQENFVSCMRVGLQKEYSGQAVALGGVFMVQNSDLNIHIMPDFSKDPLNSDAEVNKWLRFFRFTSPMVFQSVLISEDPGLDLRLEHSHGYSCVDEGGHCWRNEGGHYHNDMSPETVEYLAYFNTAECIYRIDRPSKPTDA	0.62
	A18, 16-19	85	EZ758914	contig00081:1:487:2|similar to Superoxide dismutase [Cu-Zn] (O73872)|Evalue: 1e-42	273	16902	13 (4)	28	161	6.42	SNYGGSRPMTMAAGPAIAVLSGPSEVKATIQLTQEGNNLRMVGDITGLTPGQHGYHIHEFGDLSNGCTSGGEHYNPEKNNHGSPQSKPRHRGDYGNINADASGNAHIDIKDSRISLAEVMGRMIIVHEKTDDLGQGGDAESLKTGNAGGRLACGVIGLKKP	1.49	4.38
	A15, 4-19	101	EZ761061	contig17421:247:1275:1|similar to Aquaporin-4 (Q5I4F9)|Evalue: 2e-36	271	37810	11 (5)	15.2	342	7.04	MKFLYDPDVPLEDFRNVRYWKAALAEFLGTFFLLFLTIGTVVTTLPSEYNTNKLTIAFTFGFTLCILYWIFGHVSGAHFNPAVTIGMLVARRISLLRALLYIAMQILGALAGAGLIYSIASVNTQRTWFGCTVLAGNNWTSPAGNIVDANGQVIAGPGYLGDASGAVGTNSPAPLSRDSAIVNAMGIGHIITRDYIGYAHGLLVEFIITAVLVMVYLACLDMRRVDTYGSGSLAVGFAYFVLTLFAVPWTMASMNPARSLATAVVRGEQCWNNHWIYWIGPILGGIVAGLLYDFVFASDASWKKIREYRTNNYVRTEHIEIDQRQPLHQVYTKTETVENPGA	0.96	5.52
	A18, 16-18	86	EZ762034	contig22450:224:790:2|No Annotation	271	22582	6 (5)	30.2	189	6.44	MHLSTFVILFLFIIVTWISTTDSYVAQDRQEPTPVFEDPCDAFPPQSCTQKHEVLNPELRRDPFKLRTPSQYQEVCQAYRSSMECFSEFTSRCRPANPEAREFLQRTLTLLGNCDDRSVRDEVLTTLECGRRMASVHDSCVKNRRYIYGLAIEQEDVFMGNPGSLKTFCCVLKYHKKCLMGRVQEKCAE	1	1.47
	A22, 4-6, 9, 13, 17-22	2	EZ760375	contig08967:1747:2187:3|No Annotation	270	16145	6	52.1	146	8.77	MSSMPRVNLTISNITWKYGAVAAGAALAQGFGALYYSRNLAGSVYDREKPLTTPPTDTEKQRNVVVGLAADIAKGFVLNYLASRYFKPADVTDAFAMTAVLGVLAMLPQITHLLTKEYSTNTWLIDQGYGMICLLIKCMCLTFIPY	2.15	7.35
	A17, 10, 18	90	EZ760283	contig08207:1:819:1|similar to Putative cysteine proteinase CG12163 (Q9VN93)|Evalue: 8e-83	270	30361	5 (4)	20.2	272	5.89	MKRAYLLQATEQGTGVYGPTQFADRTYAEFKRHATGLSLSGELSRPKNAQTTDMNEEDLPDEFDWRTKGVVTNVKNQGQCGSCWAFSTTGNIEGIWALKKGKLLSLSEQELVDCDKMDQGCGGGLMTNAYKAIIQLGGLESESKYPYEGSDEKCQFKTENVVVYINGSVNISTDETEIAKWLVKNGPISIGINANAMMYYFGGVSHPWKVVCSPKNLDHGVLIVGYGKDGTKPYWIVKNSWGPHWGSKGYYLVYRGDGTCGLNLMCTSAVVE	0.68	0.9
	A19, 18-22	74	EZ762425	contig24044:157:536:1|similar to Peroxiredoxin-2 (Q2PFZ3)|Evalue: 2e-33	270	14240	9 (4)	28.6	126	5.61	MSSKQCLKIGSPAPDFKAVAVIDGQFQDIQLSTLKGKYVVLLFYPLDFTFVCPTEILAFSSRMDDFAKMDTVVLGISCDSHFTHLAWMNTPKKDGGLGPLKLPLLSDMTHEISMNYNIYMEEHGHS	1.93	3.19
	A19, 4, 5, 13	75	EZ761200	contig18001:1:471:1|similar to Transmembrane emp24 domain-containing protein 2 (P49020)|Evalue: 1e-52	269	17682	6	39.7	156	4.92	ITIEPDSQECFFDRVKTGTKMGLTFEVVEGGFMDIDVQISGPDAKVVYSGDRESNGKYTFAAYSEGPYTYCFSNKMSTLTTKTIMFSMDIGEATEPHTPSPDHTNQEHEKLDNMIRDLAAALTTVKHEQDYMNVRARIHATINESTNSRVVLWAFF	1.86	2.43
	A10, 15	133	EZ760794	contig13117:73:1695:1|similar to EH domain-containing protein 1 (Q9H4M9)|Evalue: 0.0	269	61231	7 (6)	11.1	540	6.24	MKSSEVKEPEVFGTVVDGLKKLYRQTILPLEEHYRFHDFHSPQLDDPDFDAKPMILLVGQYSTGKTTFIRYLIEQDFPGMRIGPEPTTDGFIAIMHSEQEGVIPGNALVVDPKKQFRKLSKFGNNFLNRFQCSLVNSPVLESVTFVDTPGILSGEKQRVDRGYDFTGVLEWFAERVDRIILLFDAHKLDISDEFRRAIEALRGHDDKIRIVLNKADMVDHQQLMRVYGALMWSLGKVLNTPEVARVYIGSFWDHPLHNDANRRLFEAEEVDLFRDIQSLPRNAALRKLNDLIKRARLAKVHAYIISALKKDMPSVFGKDSKKKXXLIAGLPNVYLQIQKEHNISPGDFPNLQRMQEQLKDQDFTKFHALKPQLIKSVDRMLAEDIAGLMNMISLEESRA…	0.37	0.42
	A14	110	EZ760190	contig07490:1:489:1|similar to UDP-glucose 4-epimerase (Q14376)|Evalue: 1e-62	269	17721	7 (6)	42	162	7.1	GSHESGMIGEDPQGPPNNLMPFVAQVAVGKRSEVKVFGNDYDTPDGTGVRDYIHITDLAKGHSAAVAKLAKEHLGFKVYNLGTGKGYSVLEMVKAMERASAKKINYTIAQRRTGDIATVYADGKLAQQELGWTAEKGLDDMCKDLWRWQQQNPTGFRTADSA	1.84
	A17, 18	91	EZ761371	contig18799:1:464:3|No Annotation	268	17256	4	42.5	153	8.92	CLLKPSVGSMLSQPELTTLGSVGLKDVKHYYPNRTFDVSGTNSPGVQIQSFRRVTEGMCRDQCLLQPNCVVSQYLVRRDAATEINCFLYTSALNTLNLRADPGYTITTFADPRRNAILATDNSQPRRNSAAQLLLATPLMLFSFVFYGLMSYA	1.05	1.76
	A16, 15	106	EZ762124	contig22865:1:928:2|hypothetical protein BRAFLDRAFT_119002 [Branchiostoma floridae] (XP_002595377.1)|Evalue: 1e-06	268	33439	5	20.8	308	8.26	CCSESESIFCHHCFEHFSATLRLISIPTLAILVLGYEKQRIKMNSSAPPDPTDFRPVYTESYPYPMPASGTVPTYVGSQETPPHMSGSMSASPSDHSIHSKEKSKGGLLNKVTTTGLGLVRAGVSAANTAVDWAAKKLDNTLQTHYGASAIMNLFQTGNVVQLISRATGRTLQILQAPNGQLVLDGNGPDDPQAFHTHFIVSREPDNVILLHNNFNYVAIVNGHTTVHRAAEQGHVTLHCRLKLHEASDKYVTIESVQEKGNAVGVTAAGQLKSALATKTSDKDSYFAVRLIYSAHGAAPTSNSKNKP	0.61	1.07
	A5, 4, 7-9, 11, 13	62	EZ759097	contig01091:1:706:3|similar to Putative protein disulfide-isomerase C1F5.02 (Q10057)|Evalue: 6e-05	268	28238	6	32.1	234	4.66	WLTDDDVRELDGEIEKVNARMFRKILEENEFVVAFFYEDDCKECDEALHELENIDDEADNFGIDFIKINDAELSRKYKIFDFPALVYFRKQHPIVYDGDIHNEEDVLKWLTSEETLNIKDEIEEVTKKMLEKLLDQRDYVAVLFYDKNSEESEEIIHELEKIDDDTEELKISFVKITDSRMARKYGVNQTPALVYFRRKYPAIYRGNLKRSEEVLDWLKKNRYKHPELSFFMYG	0.95	1.8
	A11	158	EZ762719	contig25105:2021:3415:1|similar to Aminoglycoside phosphotransferase domain-containing protein 1 (Q6PB06)|Evalue: 2e-23	268	53037	6 (5)	17.2	464	5.68	MSDATSPLPPTDHSNSDDCAFKTKTTSKVDIAELKQWIESTYHLKAESLKPLHGYDDHNFLLRTRDSASAETTTRSVYNGFSSQEFVVKLTPDSTTSHLEVAEAQNAAALFLLNNQDEFQVPVALASVDQCSFHLTRIPYTDGRSAPQMVRLLHYIPGDLLYDISAEPQSTVLMAIGKLVGSVRTILKNLKHPIFDNEHSRYMYNYWQLQNLPTLTQYLYAVEEPEKLTVCKEVIGHFTKVLEQFGSQLERHVIHGDINEGNLVLQQTSTSETQQSHNRTERRSDNDSEKTAKSVESQAAAWALKGLIDFTDSHRSYAIFELTLAMSYMMMESRRKWQMRATTSENTTSVDDEKSNIEDEFLTSGAYVLVGYLNSHNSRTLNRPETHVLKTAIEGRLVQ…	0.44
	A9, 5-13	135	EZ761752	contig20608:1:663:2|similar to Spectrin alpha chain (P13395)|Evalue: 2e-53	267	26036	7	28.6	220	6.38	YRSVGRVWKKAQKLVEFLRQYEEMMFWIKDREAFMTSEDRERDLEHVETLQRKFEDFLKEMQSQESRVTTIVGLANRLVSEGHQDKELIDQHRRTLIESWNRLRELSLRKQEKLSSAQEIQRFNRDADETLTWIAEKEXPVSSEDYGKDLSSGTGHSSESMNTLERDFQAIQDKIKTLQSESSRLKSTHPDHASQIDRXVAEVNRRWADLMNAAANRKQR	1.32	4.63
	A7, 4-18	88	EZ760825	contig13522:1:269:3|No Annotation	267	10952	11 (6)	50.6	89	9.74	TKGLLKNEKYNEKNRREMYEKQYSYENQYRMYLERNPQQSQQTPKTAAHKFINTIRYIRPTPLITGNGREEFPQWSNLPIRTFQMWEIP	4.15	35.97
	A13, 12-19	121	EZ762820	contig25519:1:245:2|similar to Fructose-bisphosphate aldolase, muscle type (P53445)|Evalue: 3e-36	267	9232	13 (5)	81.5	81	5.24	GLAERCAQYKKDGADFAKWRCVLNINAKNPSPLAILENCNVLARYAVICQQNGLVPIVEPEVLPDGDHDLERAQYVTEKVL	12.04	19.21
	A15	105	EZ763117	contig27034:95:808:2|similar to Phytanoyl-CoA dioxygenase domain-containing protein 1 (Q5U3U0)|Evalue: 2e-53	267	26828	5 (4)	24.8	238	5.37	MVKFDASYVEHFHKYGYATIPDFLSSDQIDALKEACKGIVSTLDADASEQKHIFEDSQSGNTISRDEYFLTSGDKIRFFFEKGALDKDGQVVLAKSEALNKVGHALHWLDSTFKEITFSEKIKQVCRDLKLEDPRLVQSMYIFKSKGIGSEVSIHQDSTFLYVDPPSNLLGFWFALDDATTENGCLHFLEGSHSNNPSRRFVRNPENGGPLTVMRGSEPNYKPEDYTAAPVSKGSLVL	0.8
	A13, 12	123	EZ758970	contig00403:1:1267:1|similar to Alcohol dehydrogenase class-3 (P46415)|Evalue: 5e-96	267	46877	7 (6)	21.1	422	7.44	TVLKYLXAKXXDXXKPNYFFXFIYITNLRKINMSSTIGKVITCRAAVVWEAGQRPKIETVTVDPPKKDEVRLKIVATSLCHTDYAHPDWMAGLSPTEEFPVILGHEGAGIVESVGEGVDDLKSGDHVLTCVQWQCRECQVCLHEKHNICVTLLPTVFRNKLADGTTRVKCRGIDIGHGVGCGTFAEYTVCMVAHLIKVNPKAPLEKLPPLCCGIPTGYGAALNIAAVKEGSSCVVAGAGCIGLSCIMGCKERKAKTIIAIDINPEKEXIARELGATDFINPKELAPTASLTSLLMQKTNGGADCAFEAVGNTKLMRDLFESTRPGCGKTVIIGVPQGSQEISINPHQLYCGRTLTGTILGGYKPRDSFGLLVDAYLAGKIKVDEFITHNVMFEHIDTAY…	0.5	0.81
	A12, 11	152	EZ762360	contig23771:287:1256:2|similar to Protein phosphatase 1B (O62830)|Evalue: 1e-110	267	36067	7 (6)	22.6	323	4.85	MGAFLDKPKTEKELECGNGNGLRFAVCSMQGWRIDMEDAHSALIGLGPPFEHWCFFAIFDGHAGGKVSKHCSEHLIKAIMDTEEFTLLKEDASTPDNPKKQELIRRGLVKGFLNLDEAMRQLPDVQSGEDRSGSTAICAVVSPSMVFLANCGDSRGLVVSDGQIKLASRDHKPVNPTEKERIQNAGGSVMIQRVNGSLAVSRALGDYEYKRVEGLGPFQQLISPEPEIFDMGRSDADEFIVLACDGVWDVMTNEEVSEFVRYQLTVSDNLENICQNLVDTCLNRGSRDNISIVLIALPGAPKVSEEAQKAEEELDRKIEQSVK	0.55	0.74
	A13, 12, 15	122	EZ761817	contig20976:1:507:1|similar to Lysosomal acid phosphatase (B1H1P9)|Evalue: 4e-06	267	19594	8 (4)	25.6	168	9.19	HLRFLAGLRFHFLVGGNGDTLRRRIKVGVHLQILLNRMKGSIGAPDVPKNPKKLIIYSGHDENIASLLSVLEYYHYNETGPNYGPINYSTAMIFETYTDGTVRILFRHNPNDMWQIPNILKHPRCSEYCPIEQLSQLWSEYRLTEEQFLTLCGAKPAACKAPYKLWSR	1.58	4.29
	A19	78	EZ759511	contig03291:1:301:2|similar to Proteasome subunit beta type-8 (P28063)|Evalue: 2e-23	266	11282	10 (4)	52.5	99	5.01	YDKKGPGLYVIDNDGLRISGNSFSIGSGSPYACGVLDTEYRFDLTDKEAYDLAKRSIYHATMRDPYSGGNVSVYHIREDGWIKIETQDVSDFYYKERGL	3.92
	A19, 18-20	79	EZ761203	contig18016:1:528:1|similar to ADP-ribosylation factor 1 (P61210)|Evalue: 2e-97	266	20041	6 (5)	37.1	175	6.19	KLFQGLFGKKEMRILMVGLDAAGKTTILYKLKLGEIVTTIPTIGFNVETVEYKNISFTVWDVGGQDKIRPLWRHYFQNTQGLIFVVDSNDRERIGEAREELMRMLAEDELRDAVLLIFANKQDLPNAMNAAEITDKLGLHSLRNRNWYIQATCATSGDGLYEGLDWLSNQLKNQK	1.17	1.89
	A13, 14	124	EZ759818	contig05012:1:318:1|similar to 4-hydroxyphenylpyruvate dioxygenase (P32754)|Evalue: 2e-40	266	12251	7 (4)	43.8	105	5.16	AITNLTERGLQFLRVPKTYYTILREKLKSAKIQVEEDLDTLEQLRILIDYDDNGYLLQIFTKPVEDRPTVFFEVIQRHNHSGFGVGNFKSLFEAIEAEQELRGNL	2.45	3.55
	A14, 14-16	111	EZ759106	contig01150:1:464:3|No Annotation	266	17386	8 (4)	36.6	153	10.35	KAQNGNGVAHHGNGSIANGHTSNLERAKYISKKNITKLRRRVSNQFEERTSTVIRTIKVDGLISHLHSVTSTVQRIFSVLPFFTNRNQPNSSNNHFDKRQPSLPNYVLHKLRMSKTFESFVVTVADALDFAHEKVQKMGLYTAAERVKSYYSH	1.9	3.12
	A15	106	EZ759457	contig02971:1:970:2|similar to F-actin-capping protein subunit alpha (Q9W2N0)|Evalue: 3e-99	266	37309	8 (6)	22	322	5.74	FYVFLVFNSSXGLVTPELIQAVLPFAASMAGYGDAISEEDRVRIVSRFLIHAPPGEFNEVFNDVRKLLNDDDLLRDRFSGVFAQYNKDQFLPVKLEGEEHAVIISEFNDLGRHRFFDPRTKRSFRFEHLRKEASDLQPFDGAEHKSXKLEMALESQFTNYVDNHYKYGVSNVFSKSDTPGQITLIACIEDHQFQPKNFWNGRWRSQWSVSFSPGQGSAELRGIIKVQVHYYEDGNVQLVSSKEIKEQVSITNEHETAKNICHIIMECENEYQSGVSENYSTMSETTFKALRRQLPLTRTKIDWNKIISYKIGNELGRVENNN	0.67
	A14, 13	112	EZ758946	contig00282:1:1286:3|similar to Isobutyryl-CoA dehydrogenase, mitochondrial (Q9UKU7)|Evalue: 3e-159	265	47432	5	14.8	427	8.39	NWSAAVFEDILKMNCSAFTKSVRFFSATKNLRSSWMRVRHSSTSPIDISSGLTEEQKQVQNVALQFAREELAPNMQKWDKEEIFPVETLKKAATLGFGAIYVPEDIGGTGMTRLDASIIFEALSTGDVPVTAYLSIHNMCAWMIAKYGNSEQKQYWIPILANMELFGSYCLTEPGSGSDAASLRTTAKKKGSDYVLNGTKAFCSGGGDTGFYVVMCRTGAEGPKGISCVLIEKGTKGMSFGKKEDKLGWNAQPTRAVILEDCHVPQKNLLGSEGQGFNIAMSGLNGGRINIASCSLGAAHTSIEMTKNYMSDRKQFGQPLADFQYLQYKLAEMATDLVASRLMVRNAASALQNGETNAVSLCAMAKLFATDTCFKVINQCLQMHGGYGYLKDFAIQQFL…	0.4	0.71
	A9	136	EZ762454	contig24195:1406:3009:2|similar to Polypeptide N-acetylgalactosaminyltransferase 13 (Q8IUC8)|Evalue: 2e-174	265	61272	5	12.7	534	7.63	MLKSKLHYHTIKVVLITSVLWLLFVAAIVVYFSELCQRGPSSNGVDVEPRQSVDSKPKNVVHQRSHRTSRTRRTTKQGLIRRIMNSLTVDGPGEQGKAVYLSGDEETRGKELFGVNQFNLVVSEKIALNRSLPDVRLPNCRSVQYPNADTLPRTSIVIVFHNEAWTTLLRSIYSIINRSPIEVLEEIILVDDMSEEKFEFLGQKLEEEIKKFEVPIRLFRMPSRSGLIRARLKGAAEAKGEVLLFLDAHIETTEGWLEPLLARVAEDRTRVVSPIIDVISDDTFEYVTASDMTWGGFNWKLNFRWYTAPNRELVRRHHDRTLPLQTPTIAGGLFAIDKKYFYEVGAYDEGQDVWGGENLELSFRIWQCGGSLEIVTCSHVGHVFRKSTPYKFPGGTATV…	0.3
	A18, 17-19	87	EZ763043	contig26566:1:275:3|No Annotation	265	10632	10 (4)	46.7	90	7.14	VDDDLYEQIENYINHQSQRTHLFPYVLLIAGSHNLIERMDQLEXKGAKVVYAIRKENIVHNPRSMLNHIVYEYTITKGIQSRMKLTESKQ	4.4	5.47
	A13	125	EZ762120	contig22844:89:1243:2|No Annotation	265	43468	5 (4)	13.8	384	8.39	MEYFAFALSAGATLFKLFSMAGSGMSKTEAAAEAQAAANAAAAKVSAEYSKKIAEMNAAHQANIKSITSMRKEDREALDKQFNEKLKQVNEQLEAERKVQQRMIEEAKQSALRAEKRYAEVAAEAQRPFLKRKEMMNFVNALKLQIRSEESILLAGTKGVGKSTFAWLLGIGTEPEPSDGDGTVDIVKLSGFVDTIGLVGWTMDDLVKMLVLLIYEGIPKDVIIFTNDRVETPLTNLGLVGIRNPLIVAMSNRFWADYNAGDFRLRETSGVKRIEPESKLDKVYDAAQYQRITRNGWGRTVTHHDDLAKLMKEREKASVRPFRWVTTLLSPEFHITDSDKDQEETFVKELLFRFIYVFEVKYKKDKRDFINYATLEDFRKLSGQ	0.34
	A11	162	EZ761720	contig20416:148:1380:1|similar to Beta-1,3-galactosyltransferase 5 (Q9N294)|Evalue: 2e-19	265	47522	6 (5)	13.4	410	6.2	MLTKESQINYASKRLNGSSVTQLKMMMFSSRSGLALLLLAACVFGFFLGYLNRAPVTIVERILLEEPQLRSERREVETTTAEAIDVNGDDGPMMPESKYEDSNKIINRFPFPPLLPKEPQMYELRNGTVHEPPSCTELKVKSQPFYLFIIHSTPEHFDERKAIRETWAKLLRLECGMRVIFSLGMHTKTREIQTRVDAEAIAHKDILQFADFVDGSRTPAMKTLRSFQWSQRECPEADYTVKGEDHVWLNVERFVKHIEDTTDECILGHVVRAGTVVFRDPQSFFYVSRAEYVGDEYPEYLTSMMYAVPRESMTKLLNAAANTPKIPVEDVFITGILANAAAVKRCDIPDYEYDHILPKELKCAKRERVAVRYLPAPEFYIYDNDSCFKYRDFCKARLK…	0.4
	A7, 4-20	89	EZ760340	contig08625:1:110:2|No Annotation	264	4172	17 (3)	69.4	36	9.05	QQKKIEGSLLIDTLTLLPSRVKKVNPFVLDKLHELC	11.6	175.51
	A14, 16	113	EZ761034	contig17157:152:1162:2|similar to Serine/threonine-protein phosphatase PP1-beta (Q627N3)|Evalue: 2e-174	264	38854	6 (5)	20.5	336	6.12	MEQDKIDVDSIINRLLEVRGSRPGKAVQLTENEIRGLCLKSREIFLSQPILLELEAPLKICGDIHGQYYDLLRLFEYGGFPPEANYLFLGDYVDRGKQSLETICLLLAYKIKYPENFFLLRGNHECASINRIYGFYDECKRRYTIKLWKTFTDCFNCLPVAAIIDEKIFCCHGGLSPDLQSMEQIRRVMRPTDVPDTGLLCDLLWSDPDKDTNDWGENDRGVSYTFGPSVVARFLHKHDFDLICRAHQVVEDGYEFFAKRQLVTLFSAPNYCGEFDNAGAMMSVDETLMCSFQILKPADKRKSPPVSGAGGNANSRPITPPRAGAPQTFSQKGKKK	0.5	0.59
	A15	107	EZ761432	contig19035:11:838:2|similar to F-actin-capping protein subunit beta (Q5R507)|Evalue: 2e-129	264	31355	7 (5)	28	275	5.37	MEDQQLDCALDLMRRLPPQQVEKNLSDLIDLVPHLCEPLLSSVDQPLKIARDETFGKDYLLCDYNRDGDSYRSPWSNKYDPPLEDGTVPSERLRKLEIDANAAFDQYRDMYFEGGVSSVYMWDLEQGFAGVILIKKTGDGSRKIKGCWDSIHVVEVQEKSGGRHAHYKLTSTAMLWLQTDKATSGNMNLGGSLTRQAETDSPVNEANPHIVTIGRMVEDMENKIRNTLNEIYFGKTKDIVNSLRSIIPLPDQKQQTALRNDLAAAIKKRAEKVDR	0.83
	A5, 4-9, 13-15	63	EZ759160	contig01454:273:1126:3|similar to ADP,ATP carrier protein 1 (Q27238)|Evalue: 4e-103	264	31956	7 (6)	20.8	284	9.89	MSSSGSDVLKDFLAGGISAAISKTAVAPLERVKLILQVQNDSKQISVEQRYKGMGDAFVRIPKEQGFMSLWRGNWANVIRYFPTQALNFAFKDQYKRIFLNNVEPSNFYRFFLGNVLAGGAAGMTSLVFVYPLDFARTRLGVDVGKSAADRQFHGLMDCVRKIYKTDGLYGLYRGFNVSVQGIFIYRAAYFGLFDTSKAWFSQKKVPVVINFGIALVVTTIAEFLAYPWDTIRRRQMMQSGQSEKMYKNTWDIIQKIAKNEGYPAFFKGAVSNMLRGIGGALVL	0.81	3.5
	A19, 16-20	80	EZ761376	contig18814:70:537:1|similar to 40S ribosomal protein S18 (Q8ISP0)|Evalue: 4e-53	264	18006	8 (6)	36.1	155	10.87	MGSLVLPEKFQHILRIMNTNVDGQRKIMYALTAIKGIGRRFATVVCKKADVDLRKRAGELTEEEIEKLITVMNNPRQYKIPDWFLNRQRDIKDGKTSQIVANNLESKLRDDLERLKKIRNHRGLRHFWGLRVRGQHTKTTGRRGRTVGVSKKKGG	1.81	4.45
	A5, 4-9, 11, 12, 15	64	EZ761555	contig19615:1:999:3|similar to Myosin light chain kinase, smooth muscle (Q6PDN3)|Evalue: 3e-29	263	36187	4	18.7	332	4.81	RSVKRASISAPSTRDYEHTNGYSDSSDALEKSRKLRQELAAESAIKPRSKEPSSARASAAATTAAAAKPPTRETKKEEQKEVVREASPPKPKLSAPNFSQKLRSQKIKDGSSLLLEVRFAANPLPTVEWYKDGDARIENSDIISIISKDTSSSLAIAEVLPEDGGEYICRISNSEGTDETSCVITVEGARRPESATDAEGGRATSEAQEGETAPIFVRHLQSANCNDGDALTLECEIVGEPAVDAVWLHNDREIKSGDDFKYVHEGNSFKLQIAEIFPEDFGTYTCEAFNAIGEASSSCSVIVEVPGEEFLGPRFSAFPQSITVEEGQAAVF	0.42	2.41
	A15	109	EZ759746	contig04564:1:305:3|similar to Probable 3-hydroxyacyl-CoA dehydrogenase F54C8.1 (P34439)|Evalue: 4e-30	263	11007	8 (5)	74	100	6.1	LLIPFMLEAIRMLERGDASAADIDTAMKLGASHPMGPLELADFVGLDITKAIVDGWTKEYPDVAAFLPSSTLDKLVTDKKLGRKTGHGFYDYTQQKQTKK	2.92
	A16, 15-18, 20	108	EZ761986	contig22215:21:483:3|similar to 3-hydroxyacyl-CoA dehydrogenase type-2 (O18404)|Evalue: 1e-23	262	16933	5 (3)	30.5	154	5.42	MEKNTKSDADSSKRVALVTGGAGSLGLATVRMFLATGFNVVVADRQSSLDSVQSNELKGRERECLFVNIDVTSEQSVQQCIRAIMDRFRRLDVVVNAAGIANSGPTFDFETKSPHALDEFVRPIMVNVVGTFNVCRLATELMLLNQTDSDGQRG	0.72	2.63
	A18, 17	88	EZ758902	contig00006:1:360:3|No Annotation	262	13898	6 (5)	59.7	119	4.61	IAPTVSRAYFYRIYVHLERFENNFGVRHDKLPCDDISPCDTTVYAYVDLEKPLAAWPGPIKSVNQMTMASWQKDTNSYDLNFNITKDVCGQPLSLVNTRVEVKDYDMASEDDLIEQFAC	2.74	4.15
	A7	90	EZ760603	contig11007:1:314:1|similar to Staphylococcal nuclease domain-containing protein 1 (Q7ZT42)|Evalue: 2e-17	261	11391	4	56.7	104	9.25	QSAQLRRGIVKQVLSGDSVIIRGQPRGGPPPECQLNFSGVAAPRTARKAAAAAASQNDTQDEPYSWEAREYLRKKVIGKEVQFTVEHKAANNREYGTLFIGDGD	1.87	2.47
	A15, 14, 17-19	110	EZ761925	contig21807:1:609:2|similar to Chymotrypsin-like protease CTRL-1 (P40313)|Evalue: 5e-17	261	22387	12 (5)	23.8	202	9.15	GFISSLFYRKTQSTKMYLRCIIAALFVAAVSCGDPSQECGVPAQSPASPKVDNGRIVGGVVALDKSWPWIAAIVQGDKFQYCGGTLISATHVLTAGHCVDGTSDEEIISGHYVILGANNYKTAGPQNTFRIKKVVRHEQYNIGAQVNNDIAILVLARPVTYSDRIRRICLAGPDMKVEEMQAKRLNPSKLRLEKDGMVRAYV	1.01	1.78
	A6, 5-8	64	EZ761905	contig21626:61:1968:1|No Annotation	260	64141	4	9.9	635	9.79	MEEKSAEPKVIRDLMEATHETKEQLSNELSEELKELQDSGVTESTQNVPNGQASEEEKSKASEKSGSGSQSTAQNTSGQSGQSSTGHASSSQGSTGQNSGGQSNTSGGQNSGQNNSGQNSSGQNNSGQANSGQSNTNQSNSGQSNSGQSNSGRSNSGRVVVVKIXGSQSGQSSGAQSGTGQRSDSQQSSGTSGQSNTNQSNTGQSNSGQGSSGQSSSNVENVKSSDTKSGGDSGSGESSKNQNGPSGQSTAESKGQSGGNQSETDGRASDTKGSSDNQQQSTSDNTNVRDSDTKDGGTTSTQSNTEQSSADNGGNGDSSTTKKGQSSEGTSGQSKGTKRKNAKDDSAKDDSTKETQNEEGSSDEGRKGPRRSMREHKKRIPEVATQEQSSSKQRKTTKG…	0.22	0.43
	A14, 4, 12-15	116	EZ761596	contig19828:1:1197:1|similar to Alcohol dehydrogenase class-3 (P81431)|Evalue: 2e-146	260	43456	5	14.8	398	8.15	VTDSLHPFCTSKLSQKPLLIMSDTTGKVIQCRAAVAWEAKAPLKLETVEVEPPKAGEVRIKLTATGVCHTDAYTLSGSDPEGLFPVILGHEGAGIVESVGEGVTNVKPGDHVIPSFVPQCYECKFCKNKKTNMCQKIRETQGKGVMPNGTSRFRCNGKPIFHFMGCSTFSEYTVVAAISVSKVDEKASLEKIGLLGCGITTGYGAALNTANVEEGSNVAIFGLGAVGLAVAMGCQERKCKRIIGIDTNADKEKIGRAFGVTDFVNPKDITNKSITDHLIAMTDGGLDYTFECVGSVALMRAALEACHKGWGVSVVVGVAAAGQEIATRPFQLITGRVWKGTSFGGFKSRDSIPVLVDRYLSGQLKLDEFVTHNVKLEEINKAFDYMHSGQSIRTIVHM	0.44	0.93
	A16	110	EZ762584	contig24560:149:1054:2|similar to Proliferating cell nuclear antigen (Q3ZBW4)|Evalue: 6e-87	260	33824	6	19.9	301	4.74	MPAQSSNFEAKFEHASLFKKVIEAVKELLGDATWDCTNTGMSLQAMDSSHVALVNLVMKSEGFEVYRCERNINMGISLSSMSKVLKCAGNDDSILIKNDSEGNVVTFQFEGKDGDRAAEFELKLMNIDVEHLGIPESDYECIVKMPSAEFQRICRDLSQFGDSVAIACSKGDVRFEASGEIGNGSIRLSSKSVVDKEEDEVAIEIESPVTLTFALKYLNHFCKATPLSNIVKLCLSNNQPLCVEYPIPDVGFIRFYLAPKVEEDTVDXSAVDSGHLTDRIMVCASDHTHNRDDTALHQLFL	0.75
	A8	119	EZ760017	contig06233:1:1734:1|similar to NMDA receptor-regulated 1-like protein (Q9DBB4)|Evalue: 5e-106	260	68557	7	14.9	577	7.28	LQIGSMRPNQRSHWLAYAVALHLQKEYDLAIRVMEECRKLAIPXKAEDKDVEYGEYLLYQLELYLEAQRYDEAIEFSIRYDSYVFDRVTLMESQVKAYKAMNKISEANEILQQLIRRNSENWSYFYELTFPTKTAPNLYEFCKQTQYRSRIQGFXRKLPLKLKDGEEYRVLIRAYLRNGLEKGLPALFHDLKSLYKDEKKVQIIEEECLRYLQFLDDTERSDNKENSHAERAPASARLWLYYYFAQHCDSKGEFEKALEYIEMAIAHTPTLVELYSGKAKILKHMSRLEEAAQLMDEAQSLDTSDRFINYKCSKYYLRANAIEKAEEILGRFTREGTKPSENLCDMQCFWFMTECARAYKRLGRLGEALRLLHLIDRHFMDIVDDQLDFHAYCLRKSTI…	0.39
	A18	89	EZ762929	contig25998:1:296:3|similar to Embryonic protein UVS.2 (P42664)|Evalue: 8e-06	260	11194	14 (6)	59.8	97	9.71	ADRDEYVSINFDNLNGINRKKFEKIPKSAYDTSKLGAYDYNSITHFPNKVYAIDKNVWTMKSKRDSSRPLGNTKLSSGDYEKIRRAYNCGPRTGNRA	10.17
	A15, 14-16, 18, 19	111	EZ762667	contig24916:99:839:3|similar to 60S ribosomal protein L23a (P62750)|Evalue: 5e-45	260	26374	7 (5)	24	246	10.88	MTKRTYGKKTKRPTAKAGGAEKKKTGVQKKTPATATDKAATAAPNKDAAQKTTGTAAKGAKKAAAEKGAAKPTQKVSSKGTAKTAKTTKRTSKGGAKKPAATIAGSAKDKALKAKQAVKKGAIVTRRRKIRTSVTFRLPKTLKTPRNPKFPRKSVPHRARMDKFAIINHPITTESAMKKIEEHNTLVFLVNIKASKPQIKQAVKSMYDVEVAKVNTLIRPDGAKKAYVRLLPDFDALDVANKIGII	0.81	2.45
	A15, 14	112	EZ761503	contig19336:176:484:2|similar to L-lactate dehydrogenase A chain (P04642)|Evalue: 2e-18	259	11031	6 (4)	36.9	103	7.71	MSDGKSDSGIRSQLLKDVQPAPTIALSKITIVGVGAVGMACAYSILNKHVAGEIALVDVDEKKLKGEEMXFAHGLQFVPYCKIQASTNYEITKGSKLCIVSAG	1.98	2.29
	A12, 11-13, 16, 18, 19	161	EZ763280	contig28037:1:429:1|similar to Trifunctional enzyme subunit beta, mitochondrial (O46629)|Evalue: 5e-60	259	15435	8 (4)	38.5	143	6.78	FKVPGVADTVTADNGIRVGTMEALSKLKPAFVKPYGTITAANASYLSDGASAALIMSEETAKAMGYKPKAYLRQWIYVAQDPKDQLLLGPAYAAPMLLDKAGLTLNDIDVFEFHEAFAGQIVANLKAMDSDYFNQTYVGRKGK	2.3	4.4
	A14	117	EZ761484	contig19248:627:1691:3|similar to Guanine nucleotide-binding protein G(q) subunit alpha (Q28294)|Evalue: 0.0	258	41838	5	20.3	354	5.42	MMTCCLTEEAKEQKRINAEIERQLKKDKRDARRELKLLLLGTGESGKSTFIKQMRIIHGSGYTEEDRRHFIKLVYQNIFMAMQSMIRAMDTLKIPFKNPENSENAMLVRGVDYETVSTFERPYVEAVKTLWADPGVQEVYDRRREYQLTDSAKYYLSDLERISDTGYLPTQQDVLRVRVPTTGIIEYPFDLESIIFRMVDVGGQRSERRKWIHCFENVTSIMFLVALSEYDQVLVESDNENRMEESKALFRTIITYPWFQNSSVILFLNKKDLLEEKIMYSHLLDYFPEYDGPPRDAQAAREFILKMFVDLNPDSDKIIYSHFTCATDTENIRFVFAAVKDTILQLNLKEYNLV	0.46
	A19	82	EZ759274	contig02063:1:239:3|No Annotation	258	8575	6 (4)	76.9	78	6.45	REKDVALVELATEMLLEMTASIKQTASLISQFRRVGTSGLGEIFLDKALQDSVYSVASRGLVELPIASLNPRFDKLKL	2.95
	A19, 17-19	83	EZ759581	contig03603:1:349:2|No Annotation	257	12960	5 (4)	34.8	115	8.27	CRSAEHGNGFYISEKNITEDGVMRTFPGVRCPDKFTSCRKIDQSITSDAQGSQKRTIRTCGYVGDTNQHKYDYRSSGTSKGEVYTCFEDNCNSAVKMSAFAAVAIAIVSSVFLVL	2.22	5.04
	A7, 5-13	91	EZ760628	contig11249:1:845:3|similar to Spectrin beta chain (Q00963)|Evalue: 2e-37	257	31074	5 (4)	22.4	281	6.4	ASIWARICWPVTITQVQEIKDKLLQLTEQRSGMMNRWEERWEHLQLILEVYQFARDAAVAEVWLISQEPYLFSQELGHSVAEVERLIKRHESFEKSTYGQDERFQALRRLTTLELKEMARRRHQEEDRERRRLSEERRRREQDSARDRDRTRESVQTSSGRGPQTGPGTPGAATEGQSSYRGPSTPSGAGGTMTSGTMPSGTMPSGVTTVGGHTSVIGVSEVESPMSPERGGTPSVSSPSRTGAGTSGAATLPSADDGTLVIEGPLIRKHESRSGGEKASD	0.66	2.27
	A13	126	EZ762515	contig24357:73:1197:1|similar to Cathepsin L (Q95029)|Evalue: 4e-34	257	42591	8 (6)	18.4	374	8.65	MNTILHTVLFVALVGFCYCKIATWEDYKTEYGLTYDDEDAEAVHRENFEKAQTLIKSNNQKGSTRAAGKEHISLKLNELAHLTKEEKLKGLFGLPKDSSTRISTRTLINKGNGKLVNRHYQFGKFPGEPKDYTKPKTLDWNARGAVQPSNYTQNPCNTCSIFTALAVLESQAFLREKKKIKLSEQFVRDCVLDPKYSDWGTDACAHGVYMDNVFQLASEVPIPTAAAVPYIQDRTLRPCKLQKGISFSNITDIVKVEGDEKMMEALRTVGPLATSLDATELAFDEKWSKWDGLNPAVYTSTKCDPKNQNHAVLLVGYGTDEKYGPYWLIRNSWGPTWGNKGLFKIKRGMCAIFDAFYPAINGEYTLGKDMMKKA	0.69
	A13, 12	128	EZ759652	contig03974:1:525:3|similar to Tolloid-like protein 2 (Q9WVM6)|Evalue: 9e-14	256	18976	4	28.2	174	4.71	SNYASNLNCRYSYTSKNGKALKVTATKFAMEGIMGCRYDRVNLYDGASNSAPMIGTFCGTNGPKNVRTTGSQLFMDFKTDELTNKQGFEIKIEETCTGDYLCASKTASGDDQCYSQSSACDAKSDCDDGSDEAFCSKECGDFLPNGLTSGSTLPAAIAVTQAGGDIHCGGVLLS	0.92	1.1
	A13	127	EZ759632	contig03896:1:1169:1|similar to Beta-centractin (Q8R5C5)|Evalue: 4e-142	256	44106	4	17.7	389	5.88	QLSSPYLHRTLDVNRSDTDEXEERLVIRIELYLGSNRSGRMEAGDVLANVPVVIDNGSGLIKAGFAGDQVPKCHFPNYVGRTKYVRLMAGALEGDIFVGPRAEEHRGLLSLRYPMEHGVVTDWADMERVWRYVYSKEQLHTDAEEHPVLITEPPNNPRRNRERAAEIFFEGFNVPAMFFQLQAALSLYATGRTTGLVLDAGDGVTHAVPIVNGFAIPHSIQRADIGGRDVTQWMRWLLMREGHTFHTSPEMEVVRQIKERTCYVALNPDKEEQTEGQNSVSYQLPDGTTIDIGASRFRAPELLFQPHLFGFEWPAIHELLYNSVRKTDLDLRKTLYENMVLSGGSTLFRGFGDRLLQEVKLMVPKDVKLRISAPQERLYSTWIGGSILA	0.34
	A18, 17-19	90	EZ763308	contig28200:1:335:1|similar to Glutathione S-transferase Mu 1 (Q9N0V4)|Evalue: 4e-19	256	13006	11 (6)	32.4	111	5.82	NAILHHLARKHNLGAKSEEEXAAMDMIEGALHDFRMGWVKLMYGSQDFEKDKSQYQMEVKKHLEMFSKYLADKQYLLGSDIKYLDFTLFDILDNHNCFLPGILNSYKNLAD	4.14	5.42
	A18, 16-18	91	EZ762967	contig26207:373:684:1|No Annotation	256	11393	5 (4)	35.9	103	8.54	MTPTAPASKCLTKSGQCPADFAPPTTRNQCLPFCQHDQDCAADQKCCTAQGPNAKGDSKGCTKMCYDTFTKKTVVNTDVPASGCEKLQTPTKAVVGKVKAEIA	1.87	3.76
	A13, 12	130	EZ762570	contig24518:126:1331:3|similar to Peptidase M20 domain-containing protein 2 (Q8IYS1)|Evalue: 2e-83	255	44750	5	16.2	401	6.06	MLSRAESLVTAVLEAEKKSLNTLSQEIWTHPETNFQEKYAHAILTDFLEKRNFRVERHYAGVNTAFRAEFQSRNYDPSIHTTVAVFCEYDALPEIGHACGHNLIAEAGAAAGLSIQAVLANEGSVEGKLVVIGSPAEEGGGGKVDLIQAGALKDVSFAMMVHPFPYNDLEPIILGISRCYVEFFGKAAHASCGPWEGINALDAAVSAYHMISMMRQQMKPDWRVHGIINNGGVKPNVIPDYTKSNYYMRATSAVDLKILEKKVLSCFETAATGAGCTFNVTWEPKPYCGMLNNKTMANLYKTHAQKEKVLYTPDIPGFYGSTDMGNVSVEVPSIHPCFNIGHEYMIHTKDFEHMAGGEGAQRFTLIASKSMAMTAIDIFTNAHLRDIINTEFIESRKKF…	0.43	0.58
	A11	166	EZ762325	contig23654:1:1510:2|similar to Cytochrome P450 2U1 (Q7Z449)|Evalue: 7e-67	255	57707	6	14.9	502	5.98	MAAQLLYALCILLLTILYLGRSFVFRIFDRITKRVPDGPPILPIIGTIGIDPGYPHKTLTEWSKQYGSMYSLSIGPRFTIAVSDINIIRKMFKDDRFSGRTNEGAFFQLESEHVDPKMGSIGIVFSDGNLWKQHRRFALTALRDFGFGKDRGQQIIADGATNLRDVMKSQNGKSFDPRMFIANVVANVISALLFSDSFSVNDDRFTRFVEYVSNDLVQTNETLLLDVYPMLRHVLPFKAQFEKFQISYKEKSQILHDLIAEHRKSFDRENPRDYVDAYFCMQGDSVQNPTYTDSQLINNVMDLFVAGFETTTTFIRWACIYLIHNRDVQEKVQQEIDKTIGQARLPTYDDHTNLPYVEAVTLETFRLSSFLPFGLPHRVTEDVELETYTIPKDTDILPL…	0.39
	A12, 11-13, 16, 18	163	EZ758916	contig00103:97:441:1|similar to Protein disulfide-isomerase A6 (Q63081)|Evalue: 9e-26	255	12685	4 (3)	33.3	114	7.68	MWEQSCGVPLTFLVVLTFVSSVVSLYDKGSSVIDLTSANFDKKVAKSDELWMVEFYAPWCGHCKSFAPEYDKAAKALKGIVNVGAINVDDNKELGGRFGIQGFPTVKNIRLKQG	1.05	2.13
	A13, 12	129	EZ762543	contig24422:1:599:3|similar to Plasma kallikrein (P26262)|Evalue: 1e-12	255	21837	6 (4)	38.9	198	9.07	KFILTSAHCFHRLTDKPYRFVAKVGSATLANADTYQIEKIINHPDFNALNLQNNIALIKLRNPVAKSANTLPICFSDASSVPTNCQTFGWGRTSATNINSYSSNMKVLATTTADCSISSGSPVLNDNTKTCARFSSGALCYGDNGGPLVCKNPETNRYQVYGINTLSIACTSSSRPPAVFNKVDGAFFTWIQTTMQSA	0.77	0.92
	A14	121	EZ762531	contig24386:111:992:3|similar to V-type proton ATPase subunit d (Q25531)|Evalue: 8e-127	254	33745	6	20.4	294	4.55	MLGFMGEFNFNIDDGYLEGLVRGFKSGILTRTDYLNLIQCETLEDLKLHLQSTDYGNFLANEPSPLQVAVIDEKLKEKIVQEFRHIRNQSVEPLSTFLDYITYAYMIDNIVLLITGSLHGRPISELIAKCHPLGAFEQMEALNIATTAAELYNAVIVDTPLAPFFVDCIPEQDLDELNIEIIRNKLYKAYLESFYDFCKEQGGTTAEVMCEILSFEADRRCFTITINSFGTELSKDDRLNLYPLCGRLNPYGIAGLTKASDYDQVRMVAENYAEYKKIFDEISTQGQSGEKTLE	0.76
	A19, 18	84	EZ761176	contig17866:98:556:2|similar to 40S ribosomal protein S16 (Q3T0X6)|Evalue: 1e-63	254	17157	10 (7)	46.7	152	10.38	MSTPAAKQPKVLPSAVQVFGRKKTATAVAYCKRGNGRIRVNGRPLELVEPQVLRYKLMEPVNLLGKNRFLGVDIRVRVKGGGSVAQVYAIRQAIAKSIVAYYQKYVDEASKKEIKEILTQYDRSLLVADPRRCEPKKFGGPGARARYQKSYR	3.2	3.63
	A11, 9-18	167	EZ759954	contig05847:1:205:2|No Annotation	254	6597	13 (3)	79.1	67	8.42	QLTADQQRSLLGEIPITKGSLTAGSSSNTSGSTGSSSYSSGTTGSSGTSGGKTTTTTEHVRETKTSS	4.71	12.64
	A17	100	EZ760018	contig06240:1:463:2|similar to Tubulin-folding cofactor B (Q9D1E6)|Evalue: 4e-12	254	17273	6 (5)	42.9	154	8.65	ERRFKSEITVKELKNLLEGITGASPASMALQLVTKEGNDFAALNDDSRSLESFRAQNGMQLKVTDSSRKPGEFEDVSQVQKFTLSDEEYAKKKNRFXAFKAQNKLGEFSPINSEKESETRDAKEQKLIDDITVSGRCLVTVTGGLQKRGTVMFK	1.92
	A14	120	EZ763211	contig27667:1:1009:2|similar to Epoxide hydrolase 4 (Q8IUS5)|Evalue: 6e-70	254	38783	7 (6)	20.6	335	6.36	YALGIFWTCIWLLKQPMRIWRSPGTYLKVQPRITPACVMDTKYGEHGFLHMKNDMRLHYVAAGSLNAPLMLFIHGFPEFWFSWRHQITHFKHNYRVVAIDMRGYGQSDKPTEVSDYAMGKLNEDIRMAIEELGYKTCTLVAHDWGGVIAWNFAGAHPEMVDKLIIMNAPHGEVFKTLPLPTLLKQMLKSWYVFAFQLPFIPEFLVQSNDLEMLTDVYTKPPMGLRLNRMSDEELDAYKHEFTRPGALESAINYYRNAFHPKRGPPTAFHQIPAPTLVIWGNMDAALETEHATLAAKWVTGPFQAHIVNGASHWVQQDAPDEVNRTMEQFLKDQEE	0.78
	A15, 16	113	EZ763257	contig27897:1:262:2|similar to Coatomer subunit epsilon (Q28104)|Evalue: 8e-16	253	10041	4	52.3	86	4.95	ALIAMQRYAEAEDYLQDALAKNNSDPATLANLFVCGHNTGKSDEVSNRYLSQLRDSHSNFEFTQFLTHKENDFDRLCLQYSNEIRQ	1.45	1.8
	A13, 14, 17	131	EZ762486	contig24248:1:1048:2|similar to Isocitrate dehydrogenase [NAD] subunit gamma, mitochondrial (P70404)|Evalue: 9e-113	253	38992	7 (6)	25.3	348	6.64	HNEKFIPPPAKWGGRHTCTLLPGDGIGQEMANHVKEVFNYAAAPVDFEEIHLDAQAPDVEGFDYAIMSIKRNGVALKGNIETRVAHQGFQSRNVLLRNRLDLFASVLWVKNLPGIKAKQKDVDIIVIRENLEAEYSGIEHESKPGIVESLKIITRDNSLRIAQFAFEWAQRYGRKKVTAIHKANIMKMSDGLFLECCKEMSKNFPELEFDHMIIDNCAMQMVYKPHQFDVMVMPNLYGDVLSNIACGVIGGPGLSSGMNMGRRYAVFETGSRNTGKSIVGQNVANPIAFLRASVDLLNYLSLDHQAHVIDNAIMKTVIEDKVWTPDLGGQASTTDVMANIIKYVKANA	0.63	1.21
	A12, 13	165	EZ762926	contig25988:1:904:3|similar to Mitogen-activated protein kinase 1 (P46196)|Evalue: 9e-134	253	35155	7 (6)	17	300	8.44	TDVRMESVQSAAVSIPTAPQMDAAQTQKHVEFIRGQSFDVGPRYTNLSYIGEGAYGMVVSAYDNVTRTKVAIKKISPFEHQTYCQRTLREIKIINRFKHENIIDILDILRAPTIEEMRDVYIVQTLMETDLYKLLKTQRLSYDHICYFLYQILRGLKYIHSANVLHRDLKPSNLLLNTNCDLKICDFGLARVADPEHDHRGFLTEYVATRWYRAPEIMLNSRGYTKSIDVWSVGCILAEMLYEKPIFPGKHYLDQLTLILNYLGTPTQEDLNSIFNEKARAYLESLPFKQKQPWIKVFPR	0.88	1.08
	A11, 12	168	EZ760064	contig06618:1:1179:1|similar to Alanine--glyoxylate aminotransferase 2, mitochondrial (Q17QF0)|Evalue: 2e-120	253	44328	7 (6)	25.7	393	8.7	THFDTVSATSSRNGLRNSVSGFRSFTTSAKVHVSFAQRPRKETTVVELPKCDFTPTQYEGPSMEKILQLRDRHSNPSYNMFTYYKKPMVIHEGYKQWLWDTEGRRYLDMFAGIVTVSVGHCHPKVQQRLQEQSQKLWHTSPIYMNPTYYEYIEKLTNKMPGNLKVVFLVNSGSEANDLAMTLMRLHTGCYDIITFRNAYHGASPSANGLTALSTWKFNIPTGFGVHQTMNPDPYKGIWGGEMCRDSPVQPQRHCDCTSSSGCAAADQYLKQMEEVLLTACPKGRVGGFFAESIQGVAGTTQYPKNFLKRAFELVRQNGGLCVSDEVQTGFGRTGDHFWGFQGHDVMPDIVTMAKGIGNGFPLAAVVTTPEIAKNLAQSLHFNTFGGNPLACAV	0.54	0.61
	A13, 12	132	EZ763033	contig26502:141:830:3|No Annotation	252	25737	4	23.1	229	4.77	MRCLWILALIYFCVTIVSCDECPETCDVNVMLAEQEKPLANATDITANSTADDFLLSAFCERSKVQMSCVDRNMKRCFAPAMPDEQFKTVTSSLANYAQDACNNTAYREEFRKAIPCHQAIWSGPGASVFQNATDAFGIVRSNISMSEAERVKAYCDHVVAAEAAAKTMVSQYCNDTTIASWVTDRLTAGIRSMDATVCSGAASGTSDIAKTTGVPPALFFAFTEFWML	0.63	1.07
	A10, 9	138	EZ759875	contig05368:1:772:1|similar to Dihydropyrimidinase (Q63150)|Evalue: 5e-95	252	28838	5 (4)	22.6	257	5.87	QLPFMGTCSVDDFHSGPFAALHGGTTTFIDFVIPQKGQSLIEAYKQWRAWADEKVLCDYGLHVAITQWNSNTAKEMEQLTTEHGVNSFKMFMAYKDVFQLADWEMIKVMKCCKRLGALAQVHAENGDMVAENCRYLLAAGVRGPEGHEQSRTEEVEEEATVRAIMLANQVNCPLYVVHVMSKSAAKAIADARRKGNVVFGEPIAAGLATDGTHYYNKCWRHAAGHVLSPPLRPDPSTPQFLMELLANGDLQTTGTDH	0.55	0.94
	A17, 18	102	EZ761065	contig17429:135:597:3|similar to Testis-expressed sequence 264 protein (Q9Y6I9)|Evalue: 2e-11	251	17820	4	32.5	154	5.63	MDATTILTLSIILILIALFATFGVLLAYCGLFREIIVNVGKPRWSRIRGFYKFQXWDYKDSGELFAEASKIAPELTKTFGVYYDNPETTSVYNRRFIVGSIIEEDGKAKVSQERMKELESKFRENGFKEIELPNLDSGVFTEFPWRTNFSIYIA	1	1.41
	A10	139	EZ759258	contig02000:91:1617:1|similar to Sorting nexin-2 (O60749)|Evalue: 1e-128	251	58344	5	12.4	508	5.31	MSNTHEPPPLFPDDNPFGANGESEEDMFQSAIGEQQTGRDPSLDSIGNDHFSSDDTPSLQNEFSRISLKNSDETAHDAEDEQSMSSTAISRINFLPSTEMEKGGSRKEKMSEEEESEEDDKFVTITVTEPQKVNEGLNAFVQYRVTTESNLPAFRKRKFSVLRRFSDFLGLHEKLQEKHLHFGRIVPPPPEKSVSGMAKVKMSKGDNAAADGSSNEFVERRRATLERFLNRIGQHPQLRMDPDFREFLEMDEALPKASNTSALSGAGVMRLFGRVSEQVSKMTFKMEEKDEWFEEKTLQFDNMEAQLRKLHSAVEALYHHRRDLANSTGIFAKSAAMLANCEEHTSLSRALSQLAETEEKIDLLYDNQANTDFYTFAELIKDYIGLLTVVKDVFYQRAK…	0.32
	A11, 10-16, 18	171	EZ762840	contig25609:1:118:2|No Annotation	251	4434	11 (4)	97.4	38	4.87	KFLEPVTVPRAQWLNECGLQNDNIKFPFDLPQDPLPKA	19.82	37.44
	A13, 9-15	134	EZ759207	contig01713:1:894:1|similar to Prostatic acid phosphatase (A6H730)|Evalue: 2e-28	251	33942	6 (4)	14.8	297	5.98	INSAQANIAAIFVPQRRQVWGNGLGSAWRPVSVLSIPRNLDNLLYMGGKICPTMDKLRDEIGNLPVAKKLFPYQKDFKDVIEKNTQKKMDDFWPPIYDVYDWVDVMNYYGLPLPSWITPAFEKQLKFLNGIWFHMMYGDNSNVQKTRLEGGSLANVIINRMITSFPQDNSTGHGKKFILYSAHDNTVAAQLSVLRSYNYTEAGSTPEELFFGANIAYELYDDGTVRIRLQNNPENGLSPAVPIIVPGCTEYCPLDKLYQLVSPFLITRAQWLKECGAPPDCNNFKYPYDLPVDTLVS	0.59	1.73
	A11	172	EZ759372	contig02550:234:1586:3|similar to Cytochrome P450 2U1 (Q4V8D1)|Evalue: 7e-74	250	51738	4	13.8	450	7.68	MKSTPEETFTDLGKTYGPIFSLYLGSKLVVVLNDYDAMKQAYIAQSEDFVGRPQTIIMTTLSTDDQGILRGFATHYHDYWKGCRRFMLTTLRNLGMGKSHLQDLIIEESEVLTDILHKTNGAVTSPRPSIINSTSNVICALAFDKRYEHGNRSFAVLRKHMDNLTRSILEAGGPLTAFPWLRFIRGSVRDNFNKFIAARAYIKDFNTQAIQEHVATYDATRTRDYIDAFLSQNKADPQNKIFDMIEIGAQLGVLFNAGSETSAKTVMWALYFMVENDMVQSTVHREIDEKIGRTRPITIEDRAELPYLDAVCRETMRVGVVAPVSLPRTNYEEVKLMGYTIPKNTIIMPNIYAILHDPRLWQNPEEFEPTRFLIDGKIEEPEYFVPFSLGKRDCVGESL…	0.28
	A10	140	EZ759802	contig04903:63:1787:3|similar to Nicalin (Q969V3)|Evalue: 3e-76	250	63940	5	12.7	574	5.59	MTIESVSDLLEITRNGCSSLVWFLLVPFIIIVIGPAMRPAQAVHQFTFHRMQQYDISGASKGTTGVGINCEAQTLLSSALVRRCLVVSWEELITQDIPTLVQKGIVALIVILPKDPSLIASNQRRGFVEMEQSLLKLDLQIPVYFVEDSAEVSDWLRSLSFETGAAKPLTATEELKKQVLGDYYYLSSSLYASKALSDVKVVNIVGRLGPEVVDPDSQRPVYLLVTHLDAFGVAPGLAYGANSDASGVAALMEVIRLFNQLTKNHRGQLKADLVFLISGAGKFNYYGTEKYLEEQTELGESGLLSRVQFVTCLDGVAGQTSAKVFVSKPPKEDTPMYRFFTSMNASSQRLSEQNVNMVHKKINLADEELTWEHERFSLAKVPGFTLTTYEMDTAAERKS…	0.28
	A16	115	EZ763331	contig28307:1:283:3|similar to N-acetylneuraminate lyase (Q5M905)|Evalue: 9e-21	250	9882	6 (3)	37.6	93	6.3	VKTGVSGIFVNGTAGEGVAMTVEERKTMAEAWVQHGRGKVGKIVIHVGASATRDARNLAAHAESLGVDAIAAVPPFYFVPTTMDQLVQCCYDV	3.51
	A19, 18	85	EZ763050	contig26593:129:609:3|uncharacterized conserved protein [Glossina morsitans morsitans] (GI_289739701)|Evalue: 1e-12	250	18068	6 (5)	36.9	160	9.66	MAWRRLIAVSSGATGGYVFSLASAVEMRGAKSDAKVKVSDLPIYDESKMSRESAYFAEPYEPSYLEKQVSVARKKLFGWWNLSEDTRDRIHHTYETGKAHTQSTIATLRDERQVIPRFLFIVGSGLIGYLFAYRRGFMRKMIYTTAGVGASAAVIYPQQF	1.35	1.76
	A14	123	EZ762007	contig22309:1:417:3|similar to UDP-glucose 4-epimerase (Q5R8D0)|Evalue: 3e-41	250	15538	7 (5)	50	138	8.75	AVSAGQPESLKRVEKITGKKVTFYKVDLMDVQSMSDVFEKHKIAFIIHCAALKAVGESCEKPLDYYENNVGGSVRLLKIAQKYGVKNFIFSSSATVYGSPQYLPLDEKHQVGVGITNPYGKTKYFVEEILRDVYTSDK	2.27
	A14	125	EZ760585	contig10852:243:1415:3|similar to Uroporphyrinogen decarboxylase (Q9PTS2)|Evalue: 2e-122	249	44257	4	13.6	390	6.51	MLKPSFTLPFLNLTFQSFLHFLSGMAIITNTTTDLQFPPLKNDLILRAAHGERVERVAIWIMRQAGRYLPEFRELRSQHDFFEIVRTPQLACQVTLQPIDRYPLDAAIIFSDILVIPQALGMEVHMLKDKGPSFPKPLVTPDDLRQLHNDVDVRKALSYVMDAITLTRKSLNGRVPLIGFAGAPWTLMSYMIEGGGSTTQSKAKRWLYTYEEASQQLLSLLTRVISEFLVAQVQAGAQMLQVFESHGGILTRDLFMKYSYPYLKTIRETVRQKLGDLGLSVPMVVFAKDSHFVLKELTELGYEVLSLDWTMDASKVRQYNPNITLQGNLDPCALYSPPDQLRALATKMLTQFGSQRTIANLGHGIYPDIPPESVQIFIDTVHNYSDQDTN	0.33
	A8	124	EZ762384	contig23852:1:2534:3|similar to Aldehyde dehydrogenase family 16 member A1 (A6QR56)|Evalue: 8e-58	249	91769	5	8.9	843	5.68	ISAVTVRALLSHPGFEVFSIFFETTLTLSLVLMSVNQNQTTEVSSKLTAPSEYADTMESVAALEEWFKQRSGLLLSLVQNAYASAPDDVEKVFTITYGPKRCKMSVGMASEELVKKCISQALAYQEQRKLDTKTAQVYSRLFYSVARTMQKNQTLLALAVSEDSGRNLQECKKDDVPLAIQCAYQYAGIAQLTTSEAGQWLPKGVTCVVPSSASPLLLTINRVCAALTAGNSVIIVTDANAALTVSAIVDMFVDCGAPKGALHLLITEHTKLLMESDLQVFDVPSNFKAIPSLNATVAGTAKSVNVVTDRHSVAIVTATADLESAADAIWDAVLYSNGRSLMCPSKILVHESVLSRFVKLLRLRLEHTRHGHHLSKSIDYSCSVPVSTVATLTEALASC…	0.19
	A14, 15	124	EZ761957	contig22067:1:882:1|similar to Aldo-keto reductase family 1 member C23-like protein (Q6W8P9)|Evalue: 1e-63	249	33861	8 (6)	23.5	293	7.88	VKDAIDAGYRSIDTAWMYENEKEVGNAVRSKISEGVIRREDIFITTKLSPIFMLKEKVPIALQKSMENLNLGYIDMYLVHFPVFWDPEDGSEKLNRDDSGKLKLRSSPVDHLAIWQEMEKAVDSGQVRSIGLSNFNRRQIQNILDNCRIKPANLQIEVHMYLQQYPLVEYTQKMGIIVSSYGSLGSRQWVPNPKKNGQPLTPILEHQTVVALAKKYSKTPAQIVLRWAIQRNLIVLPKSTNKERMTQNMQIFDFSLTPEDTTELKKLEEGARLYMELMKGMEVLPEYPFNEPF	0.75	1.07
	A11, 10	173	EZ759983	contig06040:1:1489:2|similar to Xaa-Pro dipeptidase (P12955)|Evalue: 0.0	248	56437	3	9.7	495	5.45	QHYEDHATARINRDGFDLSKLTVPMSLFANNRERLCKELRQSSQYSPSQVVLLQGGASAQRYCTDVELLFRQESFFHWAFGVLEPDCYGTIDVESGKSTLFVPRLPESYGVWLGKVWSCEDFKTYYRVDSVHYVDELPLFFTEIKNASLTLLTLTGVNSDSGSTTKEATFEGIDKFTVNNTILYPIFCECRVIKSAEELDVLRYVNKISSAAHRHVMSKVRVGLKEYQMESEFLHFAYYYGGCRHTSYTCICGAGENSAVLHYGHAAAPNDRVLKDGDMCLFDMGAEYYCYSSDITCSFPANGKFTGNQKIVYNAVLKANRAVLNTMKPXISWVDMHLLAERNILESLKAAGLVRGELDQMMEARLGAVFMPHGLGHFMGIDVHDVGAYPKGTERIQKP…	0.19	0.38
	A15, 16	116	EZ761584	contig19771:1:769:2|similar to Calbindin-32 (P41044)|Evalue: 2e-40	248	29958	5	24.7	255	5.51	NGEIIGSELDGFLMDYLKNCGFDSKDAKSKKVADRIKKEFFSEYPIESDGKINIKDLANLLPVEERFLAIFRVKMSLKSSQEFMLLWWKYDKDKSGFIEERELRSFLYDNVTRNSKVGHISNELLDEYTRAMMLYYDKNGDGRLHLSELAKLLPTLEDFTTVPTQKFKPGFKVVELEPVFAQYDKNHNNYIEPLELEALCKDLLAYSMDNYHINDVQSLHATFMKACDRDHDGRLDIREMRLVFELLDKIAAKKL	0.69	1.38
	A12, 13	167	EZ759503	contig03261:1:705:1|similar to Eukaryotic translation initiation factor 3 subunit E-B (Q1LUA8)|Evalue: 4e-78	248	27734	8 (5)	26	235	7.27	VHAPLVQSLNDRAWLIHWSLYVFFNHQKGKDMLVEWCTQPEYLNAIQTLSPHILRYLVVAILTNRRKRTMIKDVVEIIKQEESTFRDPVTEFVESLFKNFDFDTAQHKLKECEMVLLNDFFLTGCVHEFIDSARQYIFENYCRIHSRISIPMLAEKLHLDAEEAEKWIANVIRNARLDARIDAAKGEVLMGTPAISSYQMLIEKTKTLSLRTQQMVNQVDKRIGGRSNTYHHQTN	0.97	1.09
	A8	125	EZ761188	contig17918:874:2442:1|similar to Vacuolar protein sorting-associated protein 35 (Q9EQH3)|Evalue: 2e-161	247	59713	4	10.2	522	5.15	MECIIQVFPDEFHLDTLNTFLKACSELQTGVNIKRVIIALIDRLSQYAQRDDSQGIPSHLHLFDIFNNQIAAIFEAKPELPLEDVVALEVALVNLALKCYPDRTDFVDKVLQNLDQIFQKMAVEQVPGESAVSKELSKLLKTPLDHYRDILTVLKLQSYGRIFAYMDAKPQREISLHVSRSIVEHATVISSQEQVEALLPLLTPLVEDKMADASIDPLDDEFVEEQTTVGKLIHYLRSDQLDQQYMILRTAQKFFANGGLHRLPYTIPTILFQAYTLAYSYYLAKENDAKWDKKCQKIFQFCHQTISALAKLELPQLSISLFLQGALSVSCVPFETYETVAYEFMSQAFSIYEEEISDSKVQIAYILQIIGVVERINCFSEESHEPLRTQCALAASKLL…	0.24
	A12, 11-16	168	EZ759015	contig00630:298:996:1|No Annotation	247	25952	15 (5)	29.3	232	5.26	MTEYRRGCGKLTQVGRGNIRPQNVNSTEGNLCNEERLDDVIKTACYCTTDGCNNYLTAADARTDDDRNDDGRHGSGAAAAAVGSRNVLLDYSRTTPQPLPADSDKTSYSFLNDHYNSSTGNIYAPYGAKEPVITISSDIALDXPNVILRFPVLQWWLAEKGNVAFNSEATVIYKDTNNNNNNNNNNVDNANTRTIVKDKDQKTILKDYNGDGRPDEVVQIQNNRNNRNSGRQ	1.63	3.53
	A14	126	EZ761896	contig21579:1:845:1|similar to Trans-1,2-dihydrobenzene-1,2-diol dehydrogenase (Q6DF30)|Evalue: 4e-58	247	31261	5 (4)	16.4	281	6.77	GNPLPTFRYARPKMTGSHTQIRWGIVGTGRICNDFCAAIKSLPAEHHQIVAVVSRQQETATNFASLFGIPNAYTEYEELASNPKIDIAYVGVINTKHFEISKLMLNHGKHVLVEKPMTLHASQTEELCALAKSKGLFIMEAIWTRCFPIYRELRSLLQSSKLGDLQLVTANFGFNNPNVENLSRLELGGGVLSNVGCYCVQLATLIFNNEYPSNISVTCIKNASGVDETTSVVMQFEKNAIAHFLVSMSMDLESSALIVGRKASVSIDAPFLAPTDLKIID	0.5
	A16, 17	117	EZ761227	contig18115:1:705:1|similar to Syntaxin-12 (Q9ER00)|Evalue: 8e-12	247	27256	7 (5)	25.1	235	5.57	KDLYSDDSCPPAVXKVDDFSLEKQLIVCGFLRRPTLTHDCTTDSRLYCFWVLTTEXXSKMDFGRLSANIGTNVQKISSQVNDVNRMLKQIGTAQDTEALRERLHNSTHFTNNLAKETSHLLKELQTLQPPYDVAEQKRQKLLKEKLVNEFGETLNRFQEAQRAAAKKEKESFLRARAQSGNTSTRNPFEDDMRRDKDLRQADQPAFSQTQSQLEEDVDLEALREREEAIRSLEAD	0.78	0.9
	A5, 4	69	EZ760664	contig11582:495:1688:3|similar to UDP-glucose:glycoprotein glucosyltransferase (Q09332)|Evalue: 9e-135	247	45956	7 (6)	20.1	398	5.52	MNCRDKLSELPLKSFYRYVLDSRLQFSENGSVSAAYATARFNSLPQTSLLTMNLQAPDNWLTEPIDAVYDLDNIRLEEVDGWGVHGGFELEYILLEGSATDYATDSPPRGTQFILGTDSEPAIVDTIVMANLGYFQLKAKAGAWNVRLREGRSKELYTIASSEGSELEGSSEEQLRVVIDSFVPHTMKITVRKRAGLEKEDVLSDGRKEDSGLLDSISNAIWSNEEKTVESKDDVINIFSLASGHLYERFLRTMMLSVVKNTKTRVKFWFLKNFLSPQFKDFMPHYAKHYGFEYELVQYKWPHWLNQQTEKQRIIWGYKILFLDVLFPLDVKKIIFVDADQTVRADMKELRDLDLGGAPYGYTPFCESRTDMDGFRFWKTGYWASHLGYRKYHISALY	0.63	0.7
[truncated: 2,402 more rows]

## Sheet: search parameter
Protein description includes the internal accession number of sequences, which contains the following information: contignumber:translation start:translation end:frame
Header	--------------------------------------------------------
Peak list format	Mascot generic
Search type	MIS
Mascot version	2.2.04
Database	Tardipep_454
Fasta file	tardipep_454_Dec09.fa
Total sequences	24679
[truncated: 28 more rows]

## Sheet: AS1
Decoy	--------------------------------------------------------
[truncated: 25 more rows]

[truncated: 26 more sheets: AS2, AS3, AS4, AS5, AS6, AS7, AS8, AS9, AS10, AS11, AS12, AS13, AS14, AS15, AS16, AS17, AS18, AS19, AS20, AS21 …]
