# Supplementary material for: Comparative proteome analysis of Milnesium tardigradum in early embryonic state versus adults in active and anhydrobiotic state
Source: PLoS One. 2012 Sep 27;7(9):e45682. doi: 10.1371/journal.pone.0045682 (PMC3459984; doi:10.1371/journal.pone.0045682)
Supplement: Table S4 — Summary of all identified proteins categorized in protein families and functional groups defined by Gene Ontology and DomainSweep analysis. (XLSX) [file pone.0045682.s004.xlsx]

## Sheet: Eggs-Active-Tun
Table S4: Summary of all all identified proteins categorized in protein families and functional groups defined by Gene Ontology and DomainSweep analysis.
Early embryonic state (EES, blue), adults in active state (AS, yellow) and tun state (TS, orange).
Protein description includes the internal accession number of sequences, which contains the following information: contignumber:translation start:translation end:frame
	state/slice no.	protein accession	protein description	protein score	protein mass	peptide matches (unique pept)	protein coverage	protein length	protein pI	protein sequence	emPAI	Sum emPAI
Protein families
Chaperones
Hsp90 family	AS8	EZ763093	contig26899:1:722:2|similar to Heat shock protein HSP 90-alpha (P07900)|Evalue: 6e-93	105	27031	2	10.4	240	5.2	KFERSKRIVKMSNDSQPETFAFQAEIKQLMSLIINTFYSNKDVFLRELISNASDALDKVRYVSLTDPSVLDSKKELEIKIIPNKADKTLTIIDSGIGMTKADLVNNLGTIAKSGTKTFMEALQSGADISMIGQFGVGFYSAYLVADRVEVVTKHNDDEQLIWESSAGGSFTIRPDHENEPLGRGTMLRLHMKDDLLEYLEEKKIREIVKKHSEYITYPISLYITKEVEKEVAEGAEPEVT	0.26	0.26
	TS8	EZ763093	contig26899:1:722:2|similar to Heat shock protein HSP 90-alpha (P07900)|Evalue: 6e-93	103	27031	3 (2)	10.4	240	5.2	KFERSKRIVKMSNDSQPETFAFQAEIKQLMSLIINTFYSNKDVFLRELISNASDALDKVRYVSLTDPSVLDSKKELEIKIIPNKADKTLTIIDSGIGMTKADLVNNLGTIAKSGTKTFMEALQSGADISMIGQFGVGFYSAYLVADRVEVVTKHNDDEQLIWESSAGGSFTIRPDHENEPLGRGTMLRLHMKDDLLEYLEEKKIREIVKKHSEYITYPISLYITKEVEKEVAEGAEPEVT	0.26	0.26
	AS8, 5, 7-19	EZ762716	contig25094:2604:4781:3|similar to Heat shock protein HSP 90-alpha (Q76LV2)|Evalue: 0.0	2690	83855	108 (45)	62.3	725	5.01	MAQNAKNDSADVETFAFQAEIAQLMSLIINTFYSNKEIFLRELISNSSDALDKIRYMSLTDPKQLDSNKEMMIKITPDKNAKTLTLRDTGIGMTKADMINNLGTIAKSGTKAFMEALQAGADISMIGQFGVGFYSAYLVADSVTVRSKHNDDEQYLWESSAGGSFTIKVDNDSEPLGRGTEVVLHLKEDQMDYVEEKKLKEIVKKHSQFIGYPIYLVTEKERDKEVEDENETKESEETQVKKEEEEPKVEEIEDDDEDKDKSDKKKKKKTVKEKYLEDEQLNKTKPIWTRNPEEISQEEYAEFYKSLTNDWEDHLAVKHFSVEGQLEFRALLFVPRRAPFDLFENRKQKNNIKLYVRRVFIMENCEELIPDYLNFVKGVVDSEDLPLNISREMLQQNKI…	11.11	19.82
	EES7, 1, 7-21	EZ762716	contig25094:2604:4781:3|similar to Heat shock protein HSP 90-alpha (Q76LV2)|Evalue: 0.0	2689	83855	139 (43)	59.6	725	5.01	MAQNAKNDSADVETFAFQAEIAQLMSLIINTFYSNKEIFLRELISNSSDALDKIRYMSLTDPKQLDSNKEMMIKITPDKNAKTLTLRDTGIGMTKADMINNLGTIAKSGTKAFMEALQAGADISMIGQFGVGFYSAYLVADSVTVRSKHNDDEQYLWESSAGGSFTIKVDNDSEPLGRGTEVVLHLKEDQMDYVEEKKLKEIVKKHSQFIGYPIYLVTEKERDKEVEDENETKESEETQVKKEEEEPKVEEIEDDDEDKDKSDKKKKKKTVKEKYLEDEQLNKTKPIWTRNPEEISQEEYAEFYKSLTNDWEDHLAVKHFSVEGQLEFRALLFVPRRAPFDLFENRKQKNNIKLYVRRVFIMENCEELIPDYLNFVKGVVDSEDLPLNISREMLQQNKI…	12.08	21.33
	TS8, 5, 7-19	EZ762716	contig25094:2604:4781:3|similar to Heat shock protein HSP 90-alpha (Q76LV2)|Evalue: 0.0	2493	83855	128 (44)	61.1	725	5.01	MAQNAKNDSADVETFAFQAEIAQLMSLIINTFYSNKEIFLRELISNSSDALDKIRYMSLTDPKQLDSNKEMMIKITPDKNAKTLTLRDTGIGMTKADMINNLGTIAKSGTKAFMEALQAGADISMIGQFGVGFYSAYLVADSVTVRSKHNDDEQYLWESSAGGSFTIKVDNDSEPLGRGTEVVLHLKEDQMDYVEEKKLKEIVKKHSQFIGYPIYLVTEKERDKEVEDENETKESEETQVKKEEEEPKVEEIEDDDEDKDKSDKKKKKKTVKEKYLEDEQLNKTKPIWTRNPEEISQEEYAEFYKSLTNDWEDHLAVKHFSVEGQLEFRALLFVPRRAPFDLFENRKQKNNIKLYVRRVFIMENCEELIPDYLNFVKGVVDSEDLPLNISREMLQQNKI…	8.26	13.85
	TS8, 4	EZ761693	contig20254:1:1418:3|similar to Heat shock protein 81-2 (Q69QQ6)|Evalue: 8e-163	270	55030	9 (6)	13	471	5.12	PTDESEETKVEEVKEEGDEKKKKIKETVHEFEELNKTKPLWTRNPSDVTEEEYASFYKSISNDWEEHLAVKHFSVEGQLEFRALLYIPKRAPFDLFENKKKRNNIKLYVRRVFIMDDCDELIPEWLSFIKGVVDSEDLPLNISREMLQQNKILKVIKKNIVKRCLEMFSELAEDKEKFGKFYEAFSKNLKLGIYEDSSNRTKLAELLRFHSTKTGDDVTSLKDYISRMSEGQNNIYYITGESKKAVENSPFLEALKKKGFEVLYMIEAIDEYMVQNLKDFEGKKLVCITKEGLELEETEDEKKEKETLKREYEELCKFMKETLGDKVEKVQINTLATGSPCILFTSQYGWSANMERIMKAQALKDNSMSSYMSGKKVMEINPKNSIIKCLKTKMEADRT…	0.26	0.32
	AS13, 7-13, 15	EZ759053	contig00854:1:1427:3|similar to Endoplasmin (Q95M18)|Evalue: 1e-143	484	54510	12 (11)	25.5	474	5.43	LKPIWTRKAADVTEEEYTEFYKSFTKDNDEPLTKIHFTAEGDVSFKSILYVPKRAAGDMLNKYGTKTDNIKLYVRRVFITDDMHDIMPKYLGFIRGVVDSDDLPLNVSRETLQQSKLLKIIRKKLVRKVLDMLKKLDKSELESFWKEYSTNVKLGVIEDAANRTRLSKLLQFQTSHSKTDLSTLTEYVSRMKPTQXTIYYMAAADRDEAEKSPFVERLXLKRDYEVLYLTEPIDEYCMQSMPEFESKKFQNAAKEGLKFGDNQKAKQKMDELKATYDPLTKWLETKVLKDKIEKAVISERLTESPCALVAKSFGWTGNMERIMKAQAYAKAQDATANFYAGQKKTLELNPGHPIVKDLLRRVEEDETDEMAENIAQVLYDSAAIRSGYQISDSVGFFTR…	1.02	3.04
	EES7, 6, 10, 11	EZ759053	contig00854:1:1427:3|similar to Endoplasmin (Q95M18)|Evalue: 1e-143	797	54510	17 (14)	33.5	474	5.43	LKPIWTRKAADVTEEEYTEFYKSFTKDNDEPLTKIHFTAEGDVSFKSILYVPKRAAGDMLNKYGTKTDNIKLYVRRVFITDDMHDIMPKYLGFIRGVVDSDDLPLNVSRETLQQSKLLKIIRKKLVRKVLDMLKKLDKSELESFWKEYSTNVKLGVIEDAANRTRLSKLLQFQTSHSKTDLSTLTEYVSRMKPTQXTIYYMAAADRDEAEKSPFVERLXLKRDYEVLYLTEPIDEYCMQSMPEFESKKFQNAAKEGLKFGDNQKAKQKMDELKATYDPLTKWLETKVLKDKIEKAVISERLTESPCALVAKSFGWTGNMERIMKAQAYAKAQDATANFYAGQKKTLELNPGHPIVKDLLRRVEEDETDEMAENIAQVLYDSAAIRSGYQISDSVGFFTR…	1.27	1.65
	TS7, 7-13	EZ759053	contig00854:1:1427:3|similar to Endoplasmin (Q95M18)|Evalue: 1e-143	517	54510	10 (9)	22.2	474	5.43	LKPIWTRKAADVTEEEYTEFYKSFTKDNDEPLTKIHFTAEGDVSFKSILYVPKRAAGDMLNKYGTKTDNIKLYVRRVFITDDMHDIMPKYLGFIRGVVDSDDLPLNVSRETLQQSKLLKIIRKKLVRKVLDMLKKLDKSELESFWKEYSTNVKLGVIEDAANRTRLSKLLQFQTSHSKTDLSTLTEYVSRMKPTQXTIYYMAAADRDEAEKSPFVERLXLKRDYEVLYLTEPIDEYCMQSMPEFESKKFQNAAKEGLKFGDNQKAKQKMDELKATYDPLTKWLETKVLKDKIEKAVISERLTESPCALVAKSFGWTGNMERIMKAQAYAKAQDATANFYAGQKKTLELNPGHPIVKDLLRRVEEDETDEMAENIAQVLYDSAAIRSGYQISDSVGFFTR…	0.7	2.56
	AS11, 7, 10-13, 16, 17	EZ759412	contig02760:1:1133:2|similar to Endoplasmin (P08113)|Evalue: 2e-101	488	42740	10 (9)	29.4	377	4.89	SLEFHTDFRGAVPTTHRPKAERIAALTEVTMRRATWIALFVTCFLXLGPLKTRSEDDLDSDDVEDSEAKVANSIGKKADGSRTDDEVVSREEEAIKLDGLNVAQMKELRAKAEKLTFQAEVDRMMKLIINSLYKSKEIFLRELISNASDALDKIRITSLKDSSVLSATDELSIRIKADKDNHVITITDTGIGMTRDELIKNLGTIARSGTSEFFQKLQESSTSEANDLIGQFGVGFYSAFLVADRITVISKHNDDKQYIWESDASTFSIAEDPRGDTLKRGTQISLHLKKEAYDFLEESTIQDLIRKYSQFINFPIYFWTSRSETVEEPIEDDSTTDKPTTDTKSEDEEVKVEDATEEKKAQTKKTEKTVWEWKLMN	0.95	2.67
	EES7, 11, 14, 15	EZ759412	contig02760:1:1133:2|similar to Endoplasmin (P08113)|Evalue: 2e-101	228	42740	4	14.6	377	4.89	SLEFHTDFRGAVPTTHRPKAERIAALTEVTMRRATWIALFVTCFLXLGPLKTRSEDDLDSDDVEDSEAKVANSIGKKADGSRTDDEVVSREEEAIKLDGLNVAQMKELRAKAEKLTFQAEVDRMMKLIINSLYKSKEIFLRELISNASDALDKIRITSLKDSSVLSATDELSIRIKADKDNHVITITDTGIGMTRDELIKNLGTIARSGTSEFFQKLQESSTSEANDLIGQFGVGFYSAFLVADRITVISKHNDDKQYIWESDASTFSIAEDPRGDTLKRGTQISLHLKKEAYDFLEESTIQDLIRKYSQFINFPIYFWTSRSETVEEPIEDDSTTDKPTTDTKSEDEEVKVEDATEEKKAQTKKTEKTVWEWKLMN	0.35	0.59
	TS7, 8, 11, 12, 16, 19	EZ759412	contig02760:1:1133:2|similar to Endoplasmin (P08113)|Evalue: 2e-101	217	42740	4	13.3	377	4.89	SLEFHTDFRGAVPTTHRPKAERIAALTEVTMRRATWIALFVTCFLXLGPLKTRSEDDLDSDDVEDSEAKVANSIGKKADGSRTDDEVVSREEEAIKLDGLNVAQMKELRAKAEKLTFQAEVDRMMKLIINSLYKSKEIFLRELISNASDALDKIRITSLKDSSVLSATDELSIRIKADKDNHVITITDTGIGMTRDELIKNLGTIARSGTSEFFQKLQESSTSEANDLIGQFGVGFYSAFLVADRITVISKHNDDKQYIWESDASTFSIAEDPRGDTLKRGTQISLHLKKEAYDFLEESTIQDLIRKYSQFINFPIYFWTSRSETVEEPIEDDSTTDKPTTDTKSEDEEVKVEDATEEKKAQTKKTEKTVWEWKLMN	0.35	1.37
Hsp70 family	AS9, 8-13, 15-18	EZ759653	contig03976:126:2186:3|similar to Chaperone protein dnaK (A6T4F4)|Evalue: 0.0	2128	75009	62 (36)	54.5	686	6.02	MLKIPQRQMLKFITQECRNSGILDEVLTVSRRFASKDTSVKGAVVGIDLGTTNSCVAIMEGKTPKVLENAEGSRTTPSVVAFTPEGERLVGMPARRQAVTNSQNTFYATKRLIGRKFEDNEVQKEAKNVSFKIVKASNGDAWVEAHGKVYSPSQIGAFVLMKMKETAEGYLGHGVKNAVITVPAYFNDSQRQATKDAGQISGLNVLRVINEPTAAALAFGMDKANDQIIAVYDLGGGTFDISVLEIQKGVFEVKSTNGDTFLGGEDFDTALLQYLIKEFKRDQGIDITKDNMAMQRLREAAEKAKIELSSALQTDINLPYLTMDASGPKHLNIKLTRSKFESIVENLIKRTVEPCQKAIKDAEVGLNDIGEVILVGGMTRVPKVQQTVQDIFKKNPSKS…	6.48	8.48
	EES8, 11-14	EZ759653	contig03976:126:2186:3|similar to Chaperone protein dnaK (A6T4F4)|Evalue: 0.0	1652	75009	49 (29)	47.4	686	6.02	MLKIPQRQMLKFITQECRNSGILDEVLTVSRRFASKDTSVKGAVVGIDLGTTNSCVAIMEGKTPKVLENAEGSRTTPSVVAFTPEGERLVGMPARRQAVTNSQNTFYATKRLIGRKFEDNEVQKEAKNVSFKIVKASNGDAWVEAHGKVYSPSQIGAFVLMKMKETAEGYLGHGVKNAVITVPAYFNDSQRQATKDAGQISGLNVLRVINEPTAAALAFGMDKANDQIIAVYDLGGGTFDISVLEIQKGVFEVKSTNGDTFLGGEDFDTALLQYLIKEFKRDQGIDITKDNMAMQRLREAAEKAKIELSSALQTDINLPYLTMDASGPKHLNIKLTRSKFESIVENLIKRTVEPCQKAIKDAEVGLNDIGEVILVGGMTRVPKVQQTVQDIFKKNPSKS…	4.09	4.36
	TS9, 8-13, 17	EZ759653	contig03976:126:2186:3|similar to Chaperone protein dnaK (A6T4F4)|Evalue: 0.0	2159	75009	79 (35)	52.9	686	6.02	MLKIPQRQMLKFITQECRNSGILDEVLTVSRRFASKDTSVKGAVVGIDLGTTNSCVAIMEGKTPKVLENAEGSRTTPSVVAFTPEGERLVGMPARRQAVTNSQNTFYATKRLIGRKFEDNEVQKEAKNVSFKIVKASNGDAWVEAHGKVYSPSQIGAFVLMKMKETAEGYLGHGVKNAVITVPAYFNDSQRQATKDAGQISGLNVLRVINEPTAAALAFGMDKANDQIIAVYDLGGGTFDISVLEIQKGVFEVKSTNGDTFLGGEDFDTALLQYLIKEFKRDQGIDITKDNMAMQRLREAAEKAKIELSSALQTDINLPYLTMDASGPKHLNIKLTRSKFESIVENLIKRTVEPCQKAIKDAEVGLNDIGEVILVGGMTRVPKVQQTVQDIFKKNPSKS…	7.5	8.05
	AS9, 8-19	EZ762958	contig26153:1:1449:2|similar to 78 kDa glucose-regulated protein (Q24798)|Evalue: 0.0	1512	53380	67 (24)	49.4	482	6.01	MRWCVQEWTCRDYANDQGNRITPSYVAFTADGERLVGDAAKNQLTSNPXNTVFDVKRLVGREWSDTSVXHDIKFYPFKVINKNSKPHIQAEVNGQAKTFAPEEISAMILTKMKEVAEAYLGKKGHXHAVVTVPAYFNDAQRQATKDAGVIAGLTVMRIINEPTAAAIAYGLDKKEGEKNILVFDLGGGTFDVSLLTIDNGVFEVIATNGDTHLGGEDFDQRVMDHFIKLFKKKHGKDMRKDHRAVQKLRREVEKAKRALSSQHQTRIEIEAIFDGIDFSETLTRAKFEELNMDLFRSTLKPVQKVLEDADLKKTDIHEIVLVGGSTRIXKVQQLVKEFFDGKEPSRGINPDEAVAYGAAVQAGVLGGEETINDMVLLDVNPLTLGIETVGGVMTKLIPR…	7.63	12.97
	EES8, 11, 13-15	EZ762958	contig26153:1:1449:2|similar to 78 kDa glucose-regulated protein (Q24798)|Evalue: 0.0	1188	53380	45 (19)	42.7	482	6.01	MRWCVQEWTCRDYANDQGNRITPSYVAFTADGERLVGDAAKNQLTSNPXNTVFDVKRLVGREWSDTSVXHDIKFYPFKVINKNSKPHIQAEVNGQAKTFAPEEISAMILTKMKEVAEAYLGKKGHXHAVVTVPAYFNDAQRQATKDAGVIAGLTVMRIINEPTAAAIAYGLDKKEGEKNILVFDLGGGTFDVSLLTIDNGVFEVIATNGDTHLGGEDFDQRVMDHFIKLFKKKHGKDMRKDHRAVQKLRREVEKAKRALSSQHQTRIEIEAIFDGIDFSETLTRAKFEELNMDLFRSTLKPVQKVLEDADLKKTDIHEIVLVGGSTRIXKVQQLVKEFFDGKEPSRGINPDEAVAYGAAVQAGVLGGEETINDMVLLDVNPLTLGIETVGGVMTKLIPR…	4.03	5.12
	TS9, 8-10, 12-16	EZ762958	contig26153:1:1449:2|similar to 78 kDa glucose-regulated protein (Q24798)|Evalue: 0.0	1439	53380	79 (23)	45.6	482	6.01	MRWCVQEWTCRDYANDQGNRITPSYVAFTADGERLVGDAAKNQLTSNPXNTVFDVKRLVGREWSDTSVXHDIKFYPFKVINKNSKPHIQAEVNGQAKTFAPEEISAMILTKMKEVAEAYLGKKGHXHAVVTVPAYFNDAQRQATKDAGVIAGLTVMRIINEPTAAAIAYGLDKKEGEKNILVFDLGGGTFDVSLLTIDNGVFEVIATNGDTHLGGEDFDQRVMDHFIKLFKKKHGKDMRKDHRAVQKLRREVEKAKRALSSQHQTRIEIEAIFDGIDFSETLTRAKFEELNMDLFRSTLKPVQKVLEDADLKKTDIHEIVLVGGSTRIXKVQQLVKEFFDGKEPSRGINPDEAVAYGAAVQAGVLGGEETINDMVLLDVNPLTLGIETVGGVMTKLIPR…	7.63	9.62
	AS9, 15	EZ759561	contig03529:113:1972:2|similar to 78 kDa glucose-regulated protein (Q24798)|Evalue: 0.0	327	68188	9 (5)	12.3	619	5.15	MQQNRAEIIPNAEGLRITPSYIAYTAENDFLVGDAAKRQAGQNPSGTIFNSKRMIGLNYKEVERDIKTFPFKVNNKDGRPFIVVPTKDGEKEFVPQEVSAKILIEMKEIAERFTGKKISKAVITVPAYFNDAQRTATKDAGEIAGLQVVRILNEPTAAAIAYGLDKTDTEKTILVYDLGGGTFDVSILTMEDGIFEVKAVNGDSHLGGEDFDNNVVSFLISEIKREHDVDLSKDKRAIGKLRAAAENAKKALSVAFSTEINVDSLFQKDGQYVPFKKNXFLVPKFEQLNMELFKKTLIPVTKVLEDAKLKKNDIDEILLVGGSTRIPKVKQLLEEYFNGKKPNQSVNPDEAVAMGAAIQAAIVQGKSETQDMVILDVTPLTLGIKTEGDVMAKVLPRNT…	0.27	0.37
	EES14	EZ759561	contig03529:113:1972:2|similar to 78 kDa glucose-regulated protein (Q24798)|Evalue: 0.0	109	68188	3 (2)	3.7	619	5.15	MQQNRAEIIPNAEGLRITPSYIAYTAENDFLVGDAAKRQAGQNPSGTIFNSKRMIGLNYKEVERDIKTFPFKVNNKDGRPFIVVPTKDGEKEFVPQEVSAKILIEMKEIAERFTGKKISKAVITVPAYFNDAQRTATKDAGEIAGLQVVRILNEPTAAAIAYGLDKTDTEKTILVYDLGGGTFDVSILTMEDGIFEVKAVNGDSHLGGEDFDNNVVSFLISEIKREHDVDLSKDKRAIGKLRAAAENAKKALSVAFSTEINVDSLFQKDGQYVPFKKNXFLVPKFEQLNMELFKKTLIPVTKVLEDAKLKKNDIDEILLVGGSTRIPKVKQLLEEYFNGKKPNQSVNPDEAVAMGAAIQAAIVQGKSETQDMVILDVTPLTLGIKTEGDVMAKVLPRNT…	0.1	0.1
	TS9, 15	EZ759561	contig03529:113:1972:2|similar to 78 kDa glucose-regulated protein (Q24798)|Evalue: 0.0	401	68188	16 (8)	23.3	619	5.15	MQQNRAEIIPNAEGLRITPSYIAYTAENDFLVGDAAKRQAGQNPSGTIFNSKRMIGLNYKEVERDIKTFPFKVNNKDGRPFIVVPTKDGEKEFVPQEVSAKILIEMKEIAERFTGKKISKAVITVPAYFNDAQRTATKDAGEIAGLQVVRILNEPTAAAIAYGLDKTDTEKTILVYDLGGGTFDVSILTMEDGIFEVKAVNGDSHLGGEDFDNNVVSFLISEIKREHDVDLSKDKRAIGKLRAAAENAKKALSVAFSTEINVDSLFQKDGQYVPFKKNXFLVPKFEQLNMELFKKTLIPVTKVLEDAKLKKNDIDEILLVGGSTRIPKVKQLLEEYFNGKKPNQSVNPDEAVAMGAAIQAAIVQGKSETQDMVILDVTPLTLGIKTEGDVMAKVLPRNT…	0.53	0.63
	AS9, 8-15, 17	EZ759346	contig02386:1:407:3|similar to 78 kDa glucose-regulated protein (Q90593)|Evalue: 9e-42	526	15260	15 (7)	58.2	134	4.45	TNDQNRLSPEDIERMVQDADKFAEEDKKVKERVEARNELXELLYSLKNQISDKEKLGAKIAEDEKETIEKALNEKIEWLESHQDASADEFKEQKKELEEIVQPIITKLYQQAGGAPPPTGGEGGEEDDSSRDEL	6.51	9.72
	EES8, 11-14	EZ759346	contig02386:1:407:3|similar to 78 kDa glucose-regulated protein (Q90593)|Evalue: 9e-42	413	15260	9 (6)	55.2	134	4.45	TNDQNRLSPEDIERMVQDADKFAEEDKKVKERVEARNELXELLYSLKNQISDKEKLGAKIAEDEKETIEKALNEKIEWLESHQDASADEFKEQKKELEEIVQPIITKLYQQAGGAPPPTGGEGGEEDDSSRDEL	2.35	3.23
	TS9, 8, 12-15	EZ759346	contig02386:1:407:3|similar to 78 kDa glucose-regulated protein (Q90593)|Evalue: 9e-42	567	15260	19 (9)	63.4	134	4.45	TNDQNRLSPEDIERMVQDADKFAEEDKKVKERVEARNELXELLYSLKNQISDKEKLGAKIAEDEKETIEKALNEKIEWLESHQDASADEFKEQKKELEEIVQPIITKLYQQAGGAPPPTGGEGGEEDDSSRDEL	10.24	11.62
	AS9, 16	EZ762618	contig24686:114:732:3|similar to Heat shock 70 kDa protein 4 (P11145)|Evalue: 2e-90	325	22807	8 (4)	25.2	206	6.75	MTTVDQQEVDPAIGIDLGTTYSCVGVWKNGKVEIIANDQGNRTTPSYVAFTESERLIGDAAKNQVAMNPSNTVFDAKRLIGRKFSDSEVQSDMKHWPFKVVCGSGEKPKISVDFKGERKEFLAEEISAMVLTKMKETAESFLSKKVSKAVITVPAYFNDSQRQATKDAGAIAGLNVLRIINEPTAAAIAYGLDQRKEEKEKHILIF	0.99	1.5
	EES8	EZ762618	contig24686:114:732:3|similar to Heat shock 70 kDa protein 4 (P11145)|Evalue: 2e-90	270	22807	10 (4)	27.2	206	6.75	MTTVDQQEVDPAIGIDLGTTYSCVGVWKNGKVEIIANDQGNRTTPSYVAFTESERLIGDAAKNQVAMNPSNTVFDAKRLIGRKFSDSEVQSDMKHWPFKVVCGSGEKPKISVDFKGERKEFLAEEISAMVLTKMKETAESFLSKKVSKAVITVPAYFNDSQRQATKDAGAIAGLNVLRIINEPTAAAIAYGLDQRKEEKEKHILIF	0.99	0.99
	TS9	EZ762618	contig24686:114:732:3|similar to Heat shock 70 kDa protein 4 (P11145)|Evalue: 2e-90	514	22807	17 (7)	38.3	206	6.75	MTTVDQQEVDPAIGIDLGTTYSCVGVWKNGKVEIIANDQGNRTTPSYVAFTESERLIGDAAKNQVAMNPSNTVFDAKRLIGRKFSDSEVQSDMKHWPFKVVCGSGEKPKISVDFKGERKEFLAEEISAMVLTKMKETAESFLSKKVSKAVITVPAYFNDSQRQATKDAGAIAGLNVLRIINEPTAAAIAYGLDQRKEEKEKHILIF	2	2
	AS9, 18	EZ762552	contig24452:1:1324:1|similar to Heat shock cognate 70 kDa protein 2 (P27322)|Evalue: 7e-146	116	47939	3	9.1	441	5.12	DLGGGTFDVSVLAIEKGVFEVMGTAGDTHLGGEDFDNRVVNYLVEEFKKKHKQDVTQSPRALRRLRTAAEKAKRTLSSSPQVSIDIDSLYEGIDFSLTLTRAKFESLNDDLFSNTIKPVEKALEFAKLDKSSIDEVILVGGSTRIPKVQEILQKFFNGKTLNRSVNPDEAVAFGAAVQAAILNGSTHEATSDLLLLDVSPLSLGIETMGGQMAVVIPRSTTIPVKQSQVFSTAADNQSSVTIKVYEGERTLTRDNHLLGNFDLHGIPPAPRGVPQIEVTFDMDANGILQVRAEDKSTGKKSAITITNDKGRLTKEEIDRMVNDAEKYKKEDEAIAARISAKNTLENYCYSLRNTIQEQEFAKKLSADEKSSFENVVNETITWLDSNPEASTEEFEEKKK…	0.22	0.29
	TS9, 17, 18	EZ762552	contig24452:1:1324:1|similar to Heat shock cognate 70 kDa protein 2 (P27322)|Evalue: 7e-146	257	47939	7 (6)	17	441	5.12	DLGGGTFDVSVLAIEKGVFEVMGTAGDTHLGGEDFDNRVVNYLVEEFKKKHKQDVTQSPRALRRLRTAAEKAKRTLSSSPQVSIDIDSLYEGIDFSLTLTRAKFESLNDDLFSNTIKPVEKALEFAKLDKSSIDEVILVGGSTRIPKVQEILQKFFNGKTLNRSVNPDEAVAFGAAVQAAILNGSTHEATSDLLLLDVSPLSLGIETMGGQMAVVIPRSTTIPVKQSQVFSTAADNQSSVTIKVYEGERTLTRDNHLLGNFDLHGIPPAPRGVPQIEVTFDMDANGILQVRAEDKSTGKKSAITITNDKGRLTKEEIDRMVNDAEKYKKEDEAIAARISAKNTLENYCYSLRNTIQEQEFAKKLSADEKSSFENVVNETITWLDSNPEASTEEFEEKKK…	0.49	0.63
	AS9, 12	EZ760913	contig15471:1:392:1|similar to Heat shock 70 kDa protein A (P09446)|Evalue: 2e-54	178	14248	13 (4)	22.3	130	4.99	NPNQNAQTFTTYADNQPAVTIQIYEGERAMTKDNHSLGKFDLTGIPPAPRGVPQIEVSIDIDANGILNVSAADKGSGKSQKITITNDKGRLSKAEIERMVNDAEKYASEDSAQRDRVQARNELESYVFSL	0.91	1.15
	TS9	EZ760913	contig15471:1:392:1|similar to Heat shock 70 kDa protein A (P09446)|Evalue: 2e-54	141	14248	9 (3)	20.8	130	4.99	NPNQNAQTFTTYADNQPAVTIQIYEGERAMTKDNHSLGKFDLTGIPPAPRGVPQIEVSIDIDANGILNVSAADKGSGKSQKITITNDKGRLSKAEIERMVNDAEKYASEDSAQRDRVQARNELESYVFSL	0.91	0.91
	AS8, 9, 11, 12, 16	EZ763113	contig27023:167:1862:2|similar to Heat shock protein 105 kDa (Q5R606)|Evalue: 2e-153	1204	63392	26 (19)	50.8	565	5.79	MSVLGFDFGNQSCYVATARAGGIEMIFNDYSMRDTPTYVSFNPQNRSLGVSARNQLLQNTTNTLYNFKRFIGRKFKDPFXXNKKLKYITFKVEEMADGSVGIKTHHLGQPVTLSVEQVTAMLLSKLKFIAENDIKIAAVDCVISVPVYFTDVERRAVMVAAQTAGLNPLRLMNDTTAVALTYGLYSQELPEPDKPPKHIIFIDVGYASTQIAAVAFNKGKLKMLAVVYEPHLGGRNFDYALLNHFATDFKDRYRIDVWSKPRAVARLRDECEKIKKLMSANATDIPLNLECFFDDKDVSGKVKREKFEELIAPELQQLESKMRDILKELNWSPESVDRVEIVGGSTRVPAVKTLIKKVFDKEPSTSLNQDEAVARGCAIQCAILSPTFKVKDFSVVDVN…	2.04	2.47
	EES7, 8, 11, 12, 15	EZ763113	contig27023:167:1862:2|similar to Heat shock protein 105 kDa (Q5R606)|Evalue: 2e-153	1135	63392	30 (18)	48.1	565	5.79	MSVLGFDFGNQSCYVATARAGGIEMIFNDYSMRDTPTYVSFNPQNRSLGVSARNQLLQNTTNTLYNFKRFIGRKFKDPFXXNKKLKYITFKVEEMADGSVGIKTHHLGQPVTLSVEQVTAMLLSKLKFIAENDIKIAAVDCVISVPVYFTDVERRAVMVAAQTAGLNPLRLMNDTTAVALTYGLYSQELPEPDKPPKHIIFIDVGYASTQIAAVAFNKGKLKMLAVVYEPHLGGRNFDYALLNHFATDFKDRYRIDVWSKPRAVARLRDECEKIKKLMSANATDIPLNLECFFDDKDVSGKVKREKFEELIAPELQQLESKMRDILKELNWSPESVDRVEIVGGSTRVPAVKTLIKKVFDKEPSTSLNQDEAVARGCAIQCAILSPTFKVKDFSVVDVN…	2.37	2.74
	TS8, 11, 14	EZ763113	contig27023:167:1862:2|similar to Heat shock protein 105 kDa (Q5R606)|Evalue: 2e-153	1377	63392	41 (20)	54.2	565	5.79	MSVLGFDFGNQSCYVATARAGGIEMIFNDYSMRDTPTYVSFNPQNRSLGVSARNQLLQNTTNTLYNFKRFIGRKFKDPFXXNKKLKYITFKVEEMADGSVGIKTHHLGQPVTLSVEQVTAMLLSKLKFIAENDIKIAAVDCVISVPVYFTDVERRAVMVAAQTAGLNPLRLMNDTTAVALTYGLYSQELPEPDKPPKHIIFIDVGYASTQIAAVAFNKGKLKMLAVVYEPHLGGRNFDYALLNHFATDFKDRYRIDVWSKPRAVARLRDECEKIKKLMSANATDIPLNLECFFDDKDVSGKVKREKFEELIAPELQQLESKMRDILKELNWSPESVDRVEIVGGSTRVPAVKTLIKKVFDKEPSTSLNQDEAVARGCAIQCAILSPTFKVKDFSVVDVN…	2.92	2.97
	TS6	EZ762386	contig23865:1:793:3|similar to Hypoxia up-regulated protein 1 (Q9Y4L1)|Evalue: 2e-24	65	29390	2	9.9	263	4.84	PSSSNSTNTDNSSTDNTSTDNTDSADNTNTTSIDPTTGTVPAAPETANVTSNTTDDTPKKESKPIIKTVTVKEKVTETVTRSDYAVYPDDSYSATRKRLVAMDEKDVEKKEREKARNNLETYIFDVQDKLYQESYEKVSTDEERSSIRSLLSTASEWLEEEASIQEATAYKDKLKSLKEAMKDIKFRLTEFEKRPKALEELAKHLNVSKSFLSSAKNISDDSIFSETEVSTLDKLISSTEEWHAKVLAAQKSLVLTENPPYTV	0.24	0.24
	AS6, 8	EZ760612	contig11113:142:505:1|similar to Hypoxia up-regulated protein 1 (Q5ZLK7)|Evalue: 8e-15	57	13734	1	9.1	121	6.32	MSTEDNDKEQSGISTKTVLFARSSAYPKSKILTFPKHASDFSFSVKYSNYEFLSKSEQSYLQKGLDLKVELKGVSDAYGKHTDKRPKGIKAHFRVDASGIFSLEKTEVLFETEKEEETMLE	0.25	0.5
	AS6, 12	EZ759153	contig01386:1:662:2|similar to Hypoxia up-regulated protein 1 (Q0VA61)|Evalue: 1e-55	191	24410	5	34.1	220	8.35	FLKMDPIFRISTVCLLLALCLSRADALATMSIDLSGEYMKVAIVKPGVPMEIVLNTESQRKTAVVVAIRNGERSFSEAALSTCAKAPQSCFIHFIDLLGKDLSHPLVKLFQTRFSHHKLENDATSGRVVFRVDSETTYSPEELLAMILKHAKDIASTFAEQKITDAVITVPPYFTKLXALAVQYAMKLASLTSLQIMNDNSAAALNFGVFRQKDLNATLS	0.9	1.04
	EES5	EZ759153	contig01386:1:662:2|similar to Hypoxia up-regulated protein 1 (Q0VA61)|Evalue: 1e-55	89	24410	3 (2)	12.3	220	8.35	FLKMDPIFRISTVCLLLALCLSRADALATMSIDLSGEYMKVAIVKPGVPMEIVLNTESQRKTAVVVAIRNGERSFSEAALSTCAKAPQSCFIHFIDLLGKDLSHPLVKLFQTRFSHHKLENDATSGRVVFRVDSETTYSPEELLAMILKHAKDIASTFAEQKITDAVITVPPYFTKLXALAVQYAMKLASLTSLQIMNDNSAAALNFGVFRQKDLNATLS	0.29	0.29
	TS6, 11-13	EZ759153	contig01386:1:662:2|similar to Hypoxia up-regulated protein 1 (Q0VA61)|Evalue: 1e-55	165	24410	5 (3)	21.4	220	8.35	FLKMDPIFRISTVCLLLALCLSRADALATMSIDLSGEYMKVAIVKPGVPMEIVLNTESQRKTAVVVAIRNGERSFSEAALSTCAKAPQSCFIHFIDLLGKDLSHPLVKLFQTRFSHHKLENDATSGRVVFRVDSETTYSPEELLAMILKHAKDIASTFAEQKITDAVITVPPYFTKLXALAVQYAMKLASLTSLQIMNDNSAAALNFGVFRQKDLNATLS	0.47	0.89
	AS9, 8, 11-13, 16, 17	EZ760741	contig12271:1:402:2|similar to Heat shock cognate 71 kDa protein (P19120)|Evalue: 2e-47	388	14834	13 (6)	58.6	133	5.88	FDFSLELXITKASDSLTSSHFTLIAYPLFTRLLTVNXLSEMSKAPAVGIDLGTTYSCVGVFQHGKVEIIANDQGNRTTPSYVAFTDTERLVGDAAKNQVAMNPQNTVFDAKRLIGRKFDEETVKSDMQHWPFK	5.38	10.32
	EES8, 10, 11, 13-15	EZ760741	contig12271:1:402:2|similar to Heat shock cognate 71 kDa protein (P19120)|Evalue: 2e-47	313	14834	15 (5)	42.1	133	5.88	FDFSLELXITKASDSLTSSHFTLIAYPLFTRLLTVNXLSEMSKAPAVGIDLGTTYSCVGVFQHGKVEIIANDQGNRTTPSYVAFTDTERLVGDAAKNQVAMNPQNTVFDAKRLIGRKFDEETVKSDMQHWPFK	4.19	7.85
	TS9, 8-10, 12, 14-17	EZ760741	contig12271:1:402:2|similar to Heat shock cognate 71 kDa protein (P19120)|Evalue: 2e-47	296	14834	14 (4)	36.1	133	5.88	FDFSLELXITKASDSLTSSHFTLIAYPLFTRLLTVNXLSEMSKAPAVGIDLGTTYSCVGVFQHGKVEIIANDQGNRTTPSYVAFTDTERLVGDAAKNQVAMNPQNTVFDAKRLIGRKFDEETVKSDMQHWPFK	2.44	5.73
	AS9, 8-12, 16	EZ760448	contig09502:237:2105:3|similar to Heat shock cognate 71 kDa protein (Q90473)|Evalue: 0.0	1374	68965	38 (19)	38.1	622	5.41	MDXEKEEKNYGTVIGIDLGTTYSCVGVYRNGQVEIISNDQGNRITPSYVAFTADGERLVGDAAKNQLTSNPENTVFDVKRLIGREWDDGSVQRDIKFYPFKVVNKGSKPVIQVQVGSKDLKTFTPEEISAMILSKMKEVAEQFLGKKVTHAVVTVPAYFNDAQRSATKDAGTIAGLNVLRIINEPTAAAIAYGLDKKKEAENILVFDLGGGTFDVSLLTIDNGVFEVVSTNGDTHLGGEDFDQNVMDYFVKLIEKKYAKDLRNDTRGLQKLRREVEKAKRVLSNEHQTRVEVESLIDGVDFGETLTRAKFEELNMDLFKSTLKPVEKALTDGAMKKSEIQEIILVGGSTRIPKIQELVKTFFDGKEPSRGVNPDEAVAYGAAVHAGALSGEQFEGHILV…	2.51	3.64
	EES8, 10, 12, 16, 17, 19	EZ760448	contig09502:237:2105:3|similar to Heat shock cognate 71 kDa protein (Q90473)|Evalue: 0.0	942	68965	30 (14)	28.3	622	5.41	MDXEKEEKNYGTVIGIDLGTTYSCVGVYRNGQVEIISNDQGNRITPSYVAFTADGERLVGDAAKNQLTSNPENTVFDVKRLIGREWDDGSVQRDIKFYPFKVVNKGSKPVIQVQVGSKDLKTFTPEEISAMILSKMKEVAEQFLGKKVTHAVVTVPAYFNDAQRSATKDAGTIAGLNVLRIINEPTAAAIAYGLDKKKEAENILVFDLGGGTFDVSLLTIDNGVFEVVSTNGDTHLGGEDFDQNVMDYFVKLIEKKYAKDLRNDTRGLQKLRREVEKAKRVLSNEHQTRVEVESLIDGVDFGETLTRAKFEELNMDLFKSTLKPVEKALTDGAMKKSEIQEIILVGGSTRIPKIQELVKTFFDGKEPSRGVNPDEAVAYGAAVHAGALSGEQFEGHILV…	1.42	1.97
	TS9, 9-12, 17-19	EZ760448	contig09502:237:2105:3|similar to Heat shock cognate 71 kDa protein (Q90473)|Evalue: 0.0	1512	68965	51 (21)	43.1	622	5.41	MDXEKEEKNYGTVIGIDLGTTYSCVGVYRNGQVEIISNDQGNRITPSYVAFTADGERLVGDAAKNQLTSNPENTVFDVKRLIGREWDDGSVQRDIKFYPFKVVNKGSKPVIQVQVGSKDLKTFTPEEISAMILSKMKEVAEQFLGKKVTHAVVTVPAYFNDAQRSATKDAGTIAGLNVLRIINEPTAAAIAYGLDKKKEAENILVFDLGGGTFDVSLLTIDNGVFEVVSTNGDTHLGGEDFDQNVMDYFVKLIEKKYAKDLRNDTRGLQKLRREVEKAKRVLSNEHQTRVEVESLIDGVDFGETLTRAKFEELNMDLFKSTLKPVEKALTDGAMKKSEIQEIILVGGSTRIPKIQELVKTFFDGKEPSRGVNPDEAVAYGAAVHAGALSGEQFEGHILV…	2.86	3.66
	AS9, 8-18	EZ760247	contig07915:1:1267:2|similar to Heat shock cognate 71 kDa protein (Q90473)|Evalue: 0.0	1653	46522	79 (26)	64.2	422	6.07	GTTYSCVGVFQHGKVEIIANDQGNRTTPSYVGFTDTERLVGDAAKNQVAMNPEHTVFDAKRLIGRRFEDATVQGDMKHWPFKVVSDGGKPKIQVEYKGETKQFFPEEISAMVLQKMKETAEAYLGKTVTQAVVTVPAXFNDSQRQATKDAGTISGMNILRIINEPTAAAIAYGLDKKVGGERNVLIFDLGGGTFDVSILTIEEGIFEVKSTAGDTHLGGEDFDNRMVTHFIQEFQRKHKKNISDNPRAVRRLRTACERAKRTLSSSTQASIEIDSLYEGVDFYSNITRARFEELCADLFRGTLDPVEKSLRDAKMDKNQIHDIVLVGGSTRIPKVQKLLQDFFNGKELNKSINPDEAVAYGAAVQAAILSGDKSEAVQDLLLLDVTPLSLGIETAGGVM…	22.41	32.48
	EES8, 7-20	EZ760247	contig07915:1:1267:2|similar to Heat shock cognate 71 kDa protein (Q90473)|Evalue: 0.0	1616	46522	88 (25)	57.8	422	6.07	GTTYSCVGVFQHGKVEIIANDQGNRTTPSYVGFTDTERLVGDAAKNQVAMNPEHTVFDAKRLIGRRFEDATVQGDMKHWPFKVVSDGGKPKIQVEYKGETKQFFPEEISAMVLQKMKETAEAYLGKTVTQAVVTVPAXFNDSQRQATKDAGTISGMNILRIINEPTAAAIAYGLDKKVGGERNVLIFDLGGGTFDVSILTIEEGIFEVKSTAGDTHLGGEDFDNRMVTHFIQEFQRKHKKNISDNPRAVRRLRTACERAKRTLSSSTQASIEIDSLYEGVDFYSNITRARFEELCADLFRGTLDPVEKSLRDAKMDKNQIHDIVLVGGSTRIPKVQKLLQDFFNGKELNKSINPDEAVAYGAAVQAAILSGDKSEAVQDLLLLDVTPLSLGIETAGGVM…	22.41	30.43
	TS9, 8-17, 19	EZ760247	contig07915:1:1267:2|similar to Heat shock cognate 71 kDa protein (Q90473)|Evalue: 0.0	1636	46522	102 (25)	56.9	422	6.07	GTTYSCVGVFQHGKVEIIANDQGNRTTPSYVGFTDTERLVGDAAKNQVAMNPEHTVFDAKRLIGRRFEDATVQGDMKHWPFKVVSDGGKPKIQVEYKGETKQFFPEEISAMVLQKMKETAEAYLGKTVTQAVVTVPAXFNDSQRQATKDAGTISGMNILRIINEPTAAAIAYGLDKKVGGERNVLIFDLGGGTFDVSILTIEEGIFEVKSTAGDTHLGGEDFDNRMVTHFIQEFQRKHKKNISDNPRAVRRLRTACERAKRTLSSSTQASIEIDSLYEGVDFYSNITRARFEELCADLFRGTLDPVEKSLRDAKMDKNQIHDIVLVGGSTRIPKVQKLLQDFFNGKELNKSINPDEAVAYGAAVQAAILSGDKSEAVQDLLLLDVTPLSLGIETAGGVM…	16.8	21.57
	AS9, 8	EZ760246	contig07914:1:483:1|similar to Heat shock 70 kDa protein cognate 4 (Q9U639)|Evalue: 9e-73	381	18328	16 (8)	43.1	160	4.86	PGVLIQVYEGERAMTRDNNLLGKFELTGIPPAPRGVPQIEVTFDIDANGILNVSAVDKSTXEKKNKITITNDKGRLSKDDIERMVRDAEKYRAEDESQRDKVQAKNALESYCFNMKSTVEDDKLKDKVTDADRKLVVDKCNEVMSWLETNQLAEKEEYEQ	5.42	5.82
	EES8	EZ760246	contig07914:1:483:1|similar to Heat shock 70 kDa protein cognate 4 (Q9U639)|Evalue: 9e-73	323	18328	15 (6)	37.5	160	4.86	PGVLIQVYEGERAMTRDNNLLGKFELTGIPPAPRGVPQIEVTFDIDANGILNVSAVDKSTXEKKNKITITNDKGRLSKDDIERMVRDAEKYRAEDESQRDKVQAKNALESYCFNMKSTVEDDKLKDKVTDADRKLVVDKCNEVMSWLETNQLAEKEEYEQ	2.27	2.27
	TS9	EZ760246	contig07914:1:483:1|similar to Heat shock 70 kDa protein cognate 4 (Q9U639)|Evalue: 9e-73	406	18328	21 (8)	45.6	160	4.86	PGVLIQVYEGERAMTRDNNLLGKFELTGIPPAPRGVPQIEVTFDIDANGILNVSAVDKSTXEKKNKITITNDKGRLSKDDIERMVRDAEKYRAEDESQRDKVQAKNALESYCFNMKSTVEDDKLKDKVTDADRKLVVDKCNEVMSWLETNQLAEKEEYEQ	4.42	4.42
	AS8, 11	EZ759976	contig06011:1:452:3|similar to Heat shock 70 kDa protein 4 (P34932)|Evalue: 1e-15	518	17662	15 (9)	57.7	149	5.07	KPKEEKVKRMKKQVKTIEMPIEYRTPNYDISPKRLNEFIEFENEMRSQDKKEKEKVDAKNELETFIYDARDKISQDNSPQISHVEREKFSEQLRQTGDWLYEEGDDQSKEVYMQKLFDLQVEFAVLTKRDDKSADKAGAEGDSGPQQMQ	3.84	4.03
	EES7	EZ759976	contig06011:1:452:3|similar to Heat shock 70 kDa protein 4 (P34932)|Evalue: 1e-15	348	17662	10 (7)	49	149	5.07	KPKEEKVKRMKKQVKTIEMPIEYRTPNYDISPKRLNEFIEFENEMRSQDKKEKEKVDAKNELETFIYDARDKISQDNSPQISHVEREKFSEQLRQTGDWLYEEGDDQSKEVYMQKLFDLQVEFAVLTKRDDKSADKAGAEGDSGPQQMQ	3.06	3.06
	TS8	EZ759976	contig06011:1:452:3|similar to Heat shock 70 kDa protein 4 (P34932)|Evalue: 1e-15	470	17662	11 (8)	49	149	5.07	KPKEEKVKRMKKQVKTIEMPIEYRTPNYDISPKRLNEFIEFENEMRSQDKKEKEKVDAKNELETFIYDARDKISQDNSPQISHVEREKFSEQLRQTGDWLYEEGDDQSKEVYMQKLFDLQVEFAVLTKRDDKSADKAGAEGDSGPQQMQ	3.84	3.84
Hsp60 family	AS9, 9-16	EZ762453	contig24176:1:143:1|similar to 60 kDa heat shock protein, mitochondrial (Q5ZL72)|Evalue: 4e-10	147	4739	1	53.2	47	4.44	IIDPTKVVRTAITDAAGVASLLSTAETVITEIPKKEDESPAMGGGGM	0.77	10.27
	EES9, 10, 12-15	EZ762453	contig24176:1:143:1|similar to 60 kDa heat shock protein, mitochondrial (Q5ZL72)|Evalue: 4e-10	192	4739	5 (2)	55.3	47	4.44	IIDPTKVVRTAITDAAGVASLLSTAETVITEIPKKEDESPAMGGGGM	4.56	9.78
	TS10, 9-17	EZ762453	contig24176:1:143:1|similar to 60 kDa heat shock protein, mitochondrial (Q5ZL72)|Evalue: 4e-10	145	4739	5 (1)	53.2	47	4.44	IIDPTKVVRTAITDAAGVASLLSTAETVITEIPKKEDESPAMGGGGM	2.14	11.04
	AS10, 9-19	EZ760182	contig07413:1:1541:1|similar to 60 kDa heat shock protein, mitochondrial (P63038)|Evalue: 0.0	1985	55565	77 (32)	66.1	513	5.88	GTMYTQRLLSRQIRSLVPVLQRTYAKDLRFGRDARYSMLRGVDLLADAVAVTMGPKGRNVIIEQSWGSPKITKDGVTVAKAIELKDKYENIGAKLVQDVASSTNDQAGDGTTAATILARAIAKEGFDKIVSGANPIEIRRGVIMAVEAVVESLKRMSRKVTTPDEIAQVATISANGDTAIGELISRAMEKVGKDGVITVKDGKTLQDELEVIKGMKFDRGFISPYFINTAKGAKTEFQDAYVLFSEKKISSIAQVVPALELAHTARKPLVIIAEDVDGEALTTLVLNRLKAGLQVVAVKAPGFGDNRKNSLRDMAIATGGTLFGDDADLYKLEDIKLDDFGRVGEVTVTKDDTLLLKGKGEKRDVEERITSIRDELEATTSEYEKEKLNERLAKLASGV…	10.19	13.95
	EES9, 9-17	EZ760182	contig07413:1:1541:1|similar to 60 kDa heat shock protein, mitochondrial (P63038)|Evalue: 0.0	1852	55565	61 (29)	62.8	513	5.88	GTMYTQRLLSRQIRSLVPVLQRTYAKDLRFGRDARYSMLRGVDLLADAVAVTMGPKGRNVIIEQSWGSPKITKDGVTVAKAIELKDKYENIGAKLVQDVASSTNDQAGDGTTAATILARAIAKEGFDKIVSGANPIEIRRGVIMAVEAVVESLKRMSRKVTTPDEIAQVATISANGDTAIGELISRAMEKVGKDGVITVKDGKTLQDELEVIKGMKFDRGFISPYFINTAKGAKTEFQDAYVLFSEKKISSIAQVVPALELAHTARKPLVIIAEDVDGEALTTLVLNRLKAGLQVVAVKAPGFGDNRKNSLRDMAIATGGTLFGDDADLYKLEDIKLDDFGRVGEVTVTKDDTLLLKGKGEKRDVEERITSIRDELEATTSEYEKEKLNERLAKLASGV…	7.4	10.73
	TS10, 9-19	EZ760182	contig07413:1:1541:1|similar to 60 kDa heat shock protein, mitochondrial (P63038)|Evalue: 0.0	2080	55565	85 (30)	65.5	513	5.88	GTMYTQRLLSRQIRSLVPVLQRTYAKDLRFGRDARYSMLRGVDLLADAVAVTMGPKGRNVIIEQSWGSPKITKDGVTVAKAIELKDKYENIGAKLVQDVASSTNDQAGDGTTAATILARAIAKEGFDKIVSGANPIEIRRGVIMAVEAVVESLKRMSRKVTTPDEIAQVATISANGDTAIGELISRAMEKVGKDGVITVKDGKTLQDELEVIKGMKFDRGFISPYFINTAKGAKTEFQDAYVLFSEKKISSIAQVVPALELAHTARKPLVIIAEDVDGEALTTLVLNRLKAGLQVVAVKAPGFGDNRKNSLRDMAIATGGTLFGDDADLYKLEDIKLDDFGRVGEVTVTKDDTLLLKGKGEKRDVEERITSIRDELEATTSEYEKEKLNERLAKLASGV…	9.57	12.12
DnaJ (Hsp40) family	EES11	EZ762080	contig22705:72:1160:3|similar to DnaJ homolog subfamily C member 9 (Q91WN1)|Evalue: 2e-34	95	41295	2	6.9	362	4.63	MSRLAKEIEETFGTTDIYDIFHVNRDATADKIKRAYHKLALKVHPDRVAIDEKATATAKFQILGKIYNVLSSNESRKMYDESGVLDDEMVGTGINHWIHYFHSLYPKITKEAIDKMEREYRGSEEEVEDLKSFYLKHRGNMNLILEELLFSKVEYEDSYRDIIRKLISEGKVEEFDGFLNEPKSSIDKRRKKAEREAREAAKMMAKRGAASASSDDALVRMIQNRNAERQNEQHKFLDDMTARYSAPTATRANGANSSRTANGMNVEESSDEDYEESEEDEEDNEAEGDAATATLLNGDVSSEEESEEASNENEEDEDEDEDEDDQIRYILNEEMLAGTLATIDSESDESGARSPSPKRRRN	0.17	0.17
	AS12	EZ761690	contig20236:3408:4481:3|similar to DnaJ homolog subfamily B member 11 (Q5RAJ6)|Evalue: 5e-112	134	40894	2	7.8	357	5.43	MWLSATTTICFLYLCCLIEESVCGRDFYKILGVSRNANLNQIKKAYRRLAKDLHPDKNPNDPKAADKFQDLGAAYEVLSDQEKREKYDQLGEEGMKQNEMHGHDPFSSFFGDFGFFGGGGRQRPDVVRGGDVTVELEVTLEELYLGNFVEVVRNKAVARSAGGTRKCNCRQEMVTQQLGPGRFQMMQNTVCDECPNVQFITEEKVLEIEIEVGMSDGQETVFVAEGEPHIDGEPGDLRAKIVTKPHHVFERRADDLYCNISISVADALTGFEMNLRHLDGHEVHVSREGVTWPGARIRKKGEGMPNYSNNNLFGTLYITFDIDFPKENFTSEEKELLRKILRQDSVKPKAYNGFRIA	0.17	0.17
	TS13, 12	EZ761690	contig20236:3408:4481:3|similar to DnaJ homolog subfamily B member 11 (Q5RAJ6)|Evalue: 5e-112	114	40894	2	7.8	357	5.43	MWLSATTTICFLYLCCLIEESVCGRDFYKILGVSRNANLNQIKKAYRRLAKDLHPDKNPNDPKAADKFQDLGAAYEVLSDQEKREKYDQLGEEGMKQNEMHGHDPFSSFFGDFGFFGGGGRQRPDVVRGGDVTVELEVTLEELYLGNFVEVVRNKAVARSAGGTRKCNCRQEMVTQQLGPGRFQMMQNTVCDECPNVQFITEEKVLEIEIEVGMSDGQETVFVAEGEPHIDGEPGDLRAKIVTKPHHVFERRADDLYCNISISVADALTGFEMNLRHLDGHEVHVSREGVTWPGARIRKKGEGMPNYSNNNLFGTLYITFDIDFPKENFTSEEKELLRKILRQDSVKPKAYNGFRIA	0.17	0.25
	EES20, 19, 1	EZ761112	contig17613:1:1068:3|similar to DnaJ homolog subfamily C member 21 (Q6PGY5)|Evalue: 3e-05	37	40557	2 (1)	3.1	355	4.88	KAKESERKVKENQAKHREERQKLLQETNVFTPDLEDKYKELENDMPSTDSEVYEVDDEEDDDPLYCVSCEKRFKSFPAMRNHVQSKMHKKNVEILRSELLKDDEELIEVLDEMENLDSTDEVTEATDLQEKVTETSKSADPVIERPDTSEDTESPRNTTHSESRLDQNGAQKNSKKKKNKVQKAFKTEDSDASDIEIPIESKSAENENDVSEAKSRKKRGKEKRNKAQKSKXTENVEASDDEITAMKTVASKPDQNGDEKXTPKTGKSKTQKNKKTQEIETSDDETVTKQTAESKPDQNGISEQSSKQKSENEKKSKVKFAPKXTEEISASEEELTILKAEASEDDKIVIDEYQS	0.08	0.24
	TS4, 19	EZ761112	contig17613:1:1068:3|similar to DnaJ homolog subfamily C member 21 (Q6PGY5)|Evalue: 3e-05	31	40557	1	3.1	355	4.88	KAKESERKVKENQAKHREERQKLLQETNVFTPDLEDKYKELENDMPSTDSEVYEVDDEEDDDPLYCVSCEKRFKSFPAMRNHVQSKMHKKNVEILRSELLKDDEELIEVLDEMENLDSTDEVTEATDLQEKVTETSKSADPVIERPDTSEDTESPRNTTHSESRLDQNGAQKNSKKKKNKVQKAFKTEDSDASDIEIPIESKSAENENDVSEAKSRKKRGKEKRNKAQKSKXTENVEASDDEITAMKTVASKPDQNGDEKXTPKTGKSKTQKNKKTQEIETSDDETVTKQTAESKPDQNGISEQSSKQKSENEKKSKVKFAPKXTEEISASEEELTILKAEASEDDKIVIDEYQS	0.08	0.16
	TS4	EZ760604	contig11009:1:950:1|similar to DnaJ homolog subfamily C member 13 (O75165)|Evalue: 4e-84	77	35954	2	6.6	316	5.09	TMLSQQEYRNKVDQIKIRNIEQALEALRNIIRANPGVEVHCIGQFKLLFSLLRVEGYANVQTFALDAIQCVTSNAECVNDIANAEVMAYLLLLTQSLPTGRLTVIETLHPLAANSRIVKEAMSKGVMVYLLDLFCNSTNAQIREKTAELFAKMMSEKLSGPKLKLQMAKFLPLIFMDAMRDSPETSVHMFEGTHENPELIWNDEAREKVTRTIVELRDRFSEQQRKDPNVIWKLPEDYNTVYSNVQGEIVVGGVFLRLYVTNPGXGFAKTEEFLVDIMDRFAELVSTSRPISEELELVSTSMAVFLEAQPVIADQV	0.19	0.19
	TS11	EZ760220	contig07692:388:2166:1|similar to DnaJ homolog subfamily C member 3 (Q5ZI13)|Evalue: 4e-87	61	68112	2	3	592	7.95	MVTLLSKQLLLLWTFWSAMDGHRVFAATKEEVEANLELAKQALGRGELANALNFYHQAIDGDSSNYMSYFKRATVYLALGKSKSALSDMEKALELKPDFLIARQQRANILLKQGKLDEAEREYRAILQISPTHADAIAQLDLIAQTRTTLQEAIRQMDQFHDLPTAAEGFTRILEICPSDVNTRTLRAEVHESLQEWPMVISDLRQIAKIRAEEPEVHLKLSHALYRNGDAEEALNAVRECLKLDSEEKNCKKHYQLLRKLVKQWLSGQEAITANDYDLCVERYDEALKTEPTVDRIXYVSRRTSYVCVSANRRMHYAGEGCSQLLELEPENADFLINRAEAYINTEQFDEAIRDFQSAVKVDGENRRAHEGLERAQKLQKQASKKDYYKILGVKRTAS…	0.1	0.1
	AS12	EZ759983	contig06040:2099:3274:1|similar to DnaJ homolog subfamily A member 2 (O60884)|Evalue: 3e-86	417	43673	9	33.5	391	6.18	KAYRKLAKQFHPDKNPEEGEKFKEISFAHEILTDPQKRSLYDRGGLDSLKEGGMGHDMEDILGSMFGGGGGGLFSSFFGGGMGGRRRQRGEDTVFPMNVTLEDLYKGKTAKISIEKTIICPSCNGTGGKSGKLANRCSTCRGTGVKVSLRPLGPGMMQQIQEECGKCRGTGQEFSDSDRCNKCDGKQVVRDKKVVDVHIDKGRRSTDRIILRGEGDQKPGIESGDVIVLLQQLKHEVFEREGEHLFMTMTIDLVDALCGFQRTITHLDGRTLLIKRGPGEVTEPKIYTVVGEGMPVYRNPMVKGNLMIKFTVDFPSDSWKPNSDVLKHLEELLGPRPTPPKIANTEEVEEVSLHSLQGHHSEGREGSSRGEAYDEDDEESEGPGNVRCQSQ	0.93	0.93
	EES11	EZ759983	contig06040:2099:3274:1|similar to DnaJ homolog subfamily A member 2 (O60884)|Evalue: 3e-86	466	43673	10	36.8	391	6.18	KAYRKLAKQFHPDKNPEEGEKFKEISFAHEILTDPQKRSLYDRGGLDSLKEGGMGHDMEDILGSMFGGGGGGLFSSFFGGGMGGRRRQRGEDTVFPMNVTLEDLYKGKTAKISIEKTIICPSCNGTGGKSGKLANRCSTCRGTGVKVSLRPLGPGMMQQIQEECGKCRGTGQEFSDSDRCNKCDGKQVVRDKKVVDVHIDKGRRSTDRIILRGEGDQKPGIESGDVIVLLQQLKHEVFEREGEHLFMTMTIDLVDALCGFQRTITHLDGRTLLIKRGPGEVTEPKIYTVVGEGMPVYRNPMVKGNLMIKFTVDFPSDSWKPNSDVLKHLEELLGPRPTPPKIANTEEVEEVSLHSLQGHHSEGREGSSRGEAYDEDDEESEGPGNVRCQSQ	1.07	1.07
	TS12	EZ759983	contig06040:2099:3274:1|similar to DnaJ homolog subfamily A member 2 (O60884)|Evalue: 3e-86	467	43673	11 (10)	39.9	391	6.18	KAYRKLAKQFHPDKNPEEGEKFKEISFAHEILTDPQKRSLYDRGGLDSLKEGGMGHDMEDILGSMFGGGGGGLFSSFFGGGMGGRRRQRGEDTVFPMNVTLEDLYKGKTAKISIEKTIICPSCNGTGGKSGKLANRCSTCRGTGVKVSLRPLGPGMMQQIQEECGKCRGTGQEFSDSDRCNKCDGKQVVRDKKVVDVHIDKGRRSTDRIILRGEGDQKPGIESGDVIVLLQQLKHEVFEREGEHLFMTMTIDLVDALCGFQRTITHLDGRTLLIKRGPGEVTEPKIYTVVGEGMPVYRNPMVKGNLMIKFTVDFPSDSWKPNSDVLKHLEELLGPRPTPPKIANTEEVEEVSLHSLQGHHSEGREGSSRGEAYDEDDEESEGPGNVRCQSQ	1.07	1.07
	AS11, 12	EZ759234	contig01842:1:1128:1|similar to DnaJ homolog subfamily A member 1 (Q5E954)|Evalue: 3e-97	143	42850	3	10.4	375	6.9	KRISFAYEVLSDQKKREMYDRGGEQALKEGGGGADFHHAQDIFDMFFGFGGGRGAQRERKGKDVVHQLKVTLEDLYNGCSRRLALQKSVICKKXXEGRGCKKGASEMQCPGCRGQGMKIRTMQLAPGFVQQSQSICNDCGGQGQRIKPEDRCPDCEGKKVVRERKILEVHVDKGMKDGQKIMFTGEGDQEPGLQPGDVYIVLDEQEHEEFKRRGNDLVMQMNIQLVEALCGFQKVILTLDQPQRHLLITNLPGQVINYGDIKFIPNEGMPIYRNPLEKGKLIVQFIVDFPKNNWLNQSRLGMLEKCLPPRQEVTIPDITEEVSLIEYSEKEAQSDARRRGHSRHHHNMDATMEDDDMEGHPGMGGVPGGVKCATQ	0.25	0.5
	EES11	EZ759234	contig01842:1:1128:1|similar to DnaJ homolog subfamily A member 1 (Q5E954)|Evalue: 3e-97	365	42850	8 (7)	32.3	375	6.9	KRISFAYEVLSDQKKREMYDRGGEQALKEGGGGADFHHAQDIFDMFFGFGGGRGAQRERKGKDVVHQLKVTLEDLYNGCSRRLALQKSVICKKXXEGRGCKKGASEMQCPGCRGQGMKIRTMQLAPGFVQQSQSICNDCGGQGQRIKPEDRCPDCEGKKVVRERKILEVHVDKGMKDGQKIMFTGEGDQEPGLQPGDVYIVLDEQEHEEFKRRGNDLVMQMNIQLVEALCGFQKVILTLDQPQRHLLITNLPGQVINYGDIKFIPNEGMPIYRNPLEKGKLIVQFIVDFPKNNWLNQSRLGMLEKCLPPRQEVTIPDITEEVSLIEYSEKEAQSDARRRGHSRHHHNMDATMEDDDMEGHPGMGGVPGGVKCATQ	0.68	0.68
	AS14	EZ759115	contig01190:1:651:1|similar to DnaJ homolog subfamily B member 1 (P25685)|Evalue: 2e-62	100	24100	3	17.1	216	9.42	FPTLCSALDQSAETSSGHSTHFYRHPLWTQPAPRKQDAPITHDLQVALEDIYNGCTKKMKISRKVFGNDGKMRKEDKVLTIEIKPGWKAGTKITFPKEGDQYPNTVAADVVFIIKDKPHTTFKRDGSDIVHTLKISLRDALCGTTLQIPTLDGPKVPLPLTDIVKPHTVKRIQGKGLPIPKQTGKRGDLVIKFDISFPDSLPKTTKDLLVDVLPSS	0.48	0.48
	TS14	EZ759115	contig01190:1:651:1|similar to DnaJ homolog subfamily B member 1 (P25685)|Evalue: 2e-62	93	24100	3 (2)	9.7	216	9.42	FPTLCSALDQSAETSSGHSTHFYRHPLWTQPAPRKQDAPITHDLQVALEDIYNGCTKKMKISRKVFGNDGKMRKEDKVLTIEIKPGWKAGTKITFPKEGDQYPNTVAADVVFIIKDKPHTTFKRDGSDIVHTLKISLRDALCGTTLQIPTLDGPKVPLPLTDIVKPHTVKRIQGKGLPIPKQTGKRGDLVIKFDISFPDSLPKTTKDLLVDVLPSS	0.3	0.3
GrpE family	AS17, 16	EZ761174	contig17853:205:969:1|similar to GrpE protein homolog 1, mitochondrial (Q5RA81)|Evalue: 1e-47	305	28432	7 (6)	28.7	254	6.99	MALVNRIYTPLRRFCGLDLFATVNRVQSESVSYSTFRDFFSSSKRSDVRTNTRTAESEESSTGNYAQSEDSKAANRRETESAANDAEASAEEPKNLLTEENAILKEKLSVLNDKYLRAIADTQNVRNRLTKQIEDAKIFGIQSFCKDLLEVADILSKATHTVSEDQLKSGSAEMRTLYDGLVMTERQLQKVFGRHGLEKIEAAGHKFDPNLHEALFQVPSSEGKEPGTVASVSQVGYKLHSRVVRPARVGVVQR	0.94	1.06
	EES15, 16	EZ761174	contig17853:205:969:1|similar to GrpE protein homolog 1, mitochondrial (Q5RA81)|Evalue: 1e-47	276	28432	7	33.9	254	6.99	MALVNRIYTPLRRFCGLDLFATVNRVQSESVSYSTFRDFFSSSKRSDVRTNTRTAESEESSTGNYAQSEDSKAANRRETESAANDAEASAEEPKNLLTEENAILKEKLSVLNDKYLRAIADTQNVRNRLTKQIEDAKIFGIQSFCKDLLEVADILSKATHTVSEDQLKSGSAEMRTLYDGLVMTERQLQKVFGRHGLEKIEAAGHKFDPNLHEALFQVPSSEGKEPGTVASVSQVGYKLHSRVVRPARVGVVQR	0.94	1.06
	TS17, 16	EZ761174	contig17853:205:969:1|similar to GrpE protein homolog 1, mitochondrial (Q5RA81)|Evalue: 1e-47	383	28432	8 (6)	32.7	254	6.99	MALVNRIYTPLRRFCGLDLFATVNRVQSESVSYSTFRDFFSSSKRSDVRTNTRTAESEESSTGNYAQSEDSKAANRRETESAANDAEASAEEPKNLLTEENAILKEKLSVLNDKYLRAIADTQNVRNRLTKQIEDAKIFGIQSFCKDLLEVADILSKATHTVSEDQLKSGSAEMRTLYDGLVMTERQLQKVFGRHGLEKIEAAGHKFDPNLHEALFQVPSSEGKEPGTVASVSQVGYKLHSRVVRPARVGVVQR	0.94	1.06
sHsp family	EES18	EZ759702	contig04304:1:362:3|similar to Small heat shock protein C4 (Q4UJB1)|Evalue: 1e-17	63	13653	2	19.3	119	8.82	GITAVGRNVRGLFDMKMELVEAENEYKVSAEVAGIPKENLHVSLDKNVLTIEGERKECTEEKKDRYHFTERKYGKIRRAITLPDDVDTEKVQTSYNNGVLCLTFGKAKESKTKKVIKVQ	0.56	0.56
	AS13, 11-14	EZ759252	contig01972:1:390:1|similar to Protein lethal(2)essential for life (P82147)|Evalue: 1e-12	183	14859	8 (3)	30	130	5.57	QFNNQFDSSNSQNNEYNMQLQSYIDNLHSPLIDQSSMGDGKSLKLRFDVRGYRPEEVTLKTVDNKLVVHAKHEEKSDNKSSYREYSREFQLPQGTDPDMIRSTLSKDGVLSVECPLPQGNRLMGPGMQAI	1.28	2.53
	EES12, 11	EZ759252	contig01972:1:390:1|similar to Protein lethal(2)essential for life (P82147)|Evalue: 1e-12	74	14859	3 (2)	18.5	130	5.57	QFNNQFDSSNSQNNEYNMQLQSYIDNLHSPLIDQSSMGDGKSLKLRFDVRGYRPEEVTLKTVDNKLVVHAKHEEKSDNKSSYREYSREFQLPQGTDPDMIRSTLSKDGVLSVECPLPQGNRLMGPGMQAI	0.51	1.02
	TS13, 12-14	EZ759252	contig01972:1:390:1|similar to Protein lethal(2)essential for life (P82147)|Evalue: 1e-12	188	14859	11 (3)	30	130	5.57	QFNNQFDSSNSQNNEYNMQLQSYIDNLHSPLIDQSSMGDGKSLKLRFDVRGYRPEEVTLKTVDNKLVVHAKHEEKSDNKSSYREYSREFQLPQGTDPDMIRSTLSKDGVLSVECPLPQGNRLMGPGMQAI	1.8	3.5
	EES16	EZ761736	contig20502:1:416:2|similar to Major egg antigen (P12812)|Evalue: 1e-05	71	16598	2	18.8	138	5.68	AQNMERHFNQMMRPFFGHNHFMEPFDRHFERMDREMDRMRQAFFGRDALPQRWSDEVTQGSDWMNDSIVEENGQKLLRLKFNAADVKPEDVMVKTRGNQMEIRVKHEQKSDDHSVYQEFARTVTLPEGVKAEELICQM	0.45	0.45
	AS11, 4-19	EZ761340	contig18673:1:499:2|similar to Major egg antigen (P12812)|Evalue: 2e-05	793	17856	52 (12)	75.3	166	6.4	SSNNQGSYGSSGHSGLSNYGSGRNDYGYQSSALSRYNDRTGSSAYGGNYGSSYNTGSSSDRQGQSGNDEGFFASIGNWMSNLIGLTDKHSTGGSGGKSIKPQIVEESGQKKVQYNFDVRGFSPENVNLTASGQRIEVTATQEDKDDDHHVRREYRRVITVPEGIKV	36.87	108.34
	EES9, 1, 3-23	EZ761340	contig18673:1:499:2|similar to Major egg antigen (P12812)|Evalue: 2e-05	849	17856	77 (12)	75.3	166	6.4	SSNNQGSYGSSGHSGLSNYGSGRNDYGYQSSALSRYNDRTGSSAYGGNYGSSYNTGSSSDRQGQSGNDEGFFASIGNWMSNLIGLTDKHSTGGSGGKSIKPQIVEESGQKKVQYNFDVRGFSPENVNLTASGQRIEVTATQEDKDDDHHVRREYRRVITVPEGIKV	62.64	227.19
	TS10, 4-19	EZ761340	contig18673:1:499:2|similar to Major egg antigen (P12812)|Evalue: 2e-05	823	17856	62 (11)	75.3	166	6.4	SSNNQGSYGSSGHSGLSNYGSGRNDYGYQSSALSRYNDRTGSSAYGGNYGSSYNTGSSSDRQGQSGNDEGFFASIGNWMSNLIGLTDKHSTGGSGGKSIKPQIVEESGQKKVQYNFDVRGFSPENVNLTASGQRIEVTATQEDKDDDHHVRREYRRVITVPEGIKV	25.79	97.24
	AS18, 17	EZ760631	contig11265:1:246:1|similar to Heat shock protein beta-1 (P42930)|Evalue: 5e-12	77	9373	1	24.7	81	6.95	RPEEITVKTIDNKLKVHAKHEEKSESKSVYREYNREFLLPKGTDPETIRSTLSKDGILTVECPLPNALTGVEERRIPITQF	0.37	0.74
	TS18, 17	EZ760631	contig11265:1:246:1|similar to Heat shock protein beta-1 (P42930)|Evalue: 5e-12	79	9373	1	24.7	81	6.95	RPEEITVKTIDNKLKVHAKHEEKSESKSVYREYNREFLLPKGTDPETIRSTLSKDGILTVECPLPNALTGVEERRIPITQF	0.37	0.74
ACD domain of sHsp	AS13, 11-16	EZ759251	contig01971:138:399:3| AGAP000941-PA [Anopheles gambiae str (XP_560153.3)|Evalue: 8e-05	425	9637	17 (7)	58.6	87	5.8	MARHSSEITIPILKRETSVIDTEFGSVGGRFDDEMRKMDSEMDRLRGDIVEGNRKLESSFSRTVTTTTRTTSTKGGTTSSSSSQEFS	20.65	30.05	nr
	EES12, 11	EZ759251	contig01971:138:399:3| AGAP000941-PA [Anopheles gambiae str (XP_560153.3)|Evalue: 8e-05	133	9637	3	33.3	87	5.8	MARHSSEITIPILKRETSVIDTEFGSVGGRFDDEMRKMDSEMDRLRGDIVEGNRKLESSFSRTVTTTTRTTSTKGGTTSSSSSQEFS	1.52	2.37	nr
	TS13, 12-14	EZ759251	contig01971:138:399:3| AGAP000941-PA [Anopheles gambiae str (XP_560153.3)|Evalue: 8e-05	323	9637	16 (6)	57.5	87	5.8	MARHSSEITIPILKRETSVIDTEFGSVGGRFDDEMRKMDSEMDRLRGDIVEGNRKLESSFSRTVTTTTRTTSTKGGTTSSSSSQEFS	10.71	16.78	nr
GroES chaperonin family	EES21, 20	EZ760357	contig08799:2167:2550:3|similar to 10 kDa heat shock protein, mitochondrial (Q5DC69)|Evalue: 1e-34	202	13984	7 (5)	40.2	127	9.56	MLPRRLLTSPIRQNVVRFFASKSESSGDKDLSKFKPLFDRVLVERFAAETKSKGGIMLPEKAVGKVLDATVVAVGPGGRNTEGKVMPIGVKVGDRVLLPEYGGTKVEMADKEYFLFRETDILAKFDS	1.98	2.53
TCP-1 chaperonin family	AS10, 11, 13, 15, 16	EZ761339	contig18669:1:1620:1|similar to T-complex protein 1 subunit eta (Q5R5C8)|Evalue: 0.0	1175	59613	24 (21)	53.4	539	5.92	LAFASGDHEVSGRQLVMNNITACQVVADAVKSTLGPRGMDKMIVDNNGKTTISNDGATILKLLEIVHPAAKMLVDIAKSQDAEVGDGTTTVVLITADLLKQIKSFVEEGVHPQIIIKSFRKATELAIEKIKELEVKINKGDQQNLRSVLEKCAQTTLSSKLLAMQRNFFSKMAVDAVLMLDELLPLDMIGIKKVTGGALEESLLVAGVAFKKTFSYAGFEMQPKKYDKPSIALLNVELELKAEKENAEVRVNSVEEYQKVVDAEWTILYEKLEAIHASGAKVVLSRLPIGDVATQWFADRDLFCAGRVPEEDLKRVQKACGGSVQTSVQKLTTDVLGTCGQFEERQVGSERYNFFTDCPLTKACTMVLRGGAEQFIDEMERSLHDAIMIVRRALKHDAV…	2.26	3.45
	EES10, 9-11, 13, 14	EZ761339	contig18669:1:1620:1|similar to T-complex protein 1 subunit eta (Q5R5C8)|Evalue: 0.0	1558	59613	30 (25)	60.7	539	5.92	LAFASGDHEVSGRQLVMNNITACQVVADAVKSTLGPRGMDKMIVDNNGKTTISNDGATILKLLEIVHPAAKMLVDIAKSQDAEVGDGTTTVVLITADLLKQIKSFVEEGVHPQIIIKSFRKATELAIEKIKELEVKINKGDQQNLRSVLEKCAQTTLSSKLLAMQRNFFSKMAVDAVLMLDELLPLDMIGIKKVTGGALEESLLVAGVAFKKTFSYAGFEMQPKKYDKPSIALLNVELELKAEKENAEVRVNSVEEYQKVVDAEWTILYEKLEAIHASGAKVVLSRLPIGDVATQWFADRDLFCAGRVPEEDLKRVQKACGGSVQTSVQKLTTDVLGTCGQFEERQVGSERYNFFTDCPLTKACTMVLRGGAEQFIDEMERSLHDAIMIVRRALKHDAV…	3.04	4.18
	TS10, 10-12	EZ761339	contig18669:1:1620:1|similar to T-complex protein 1 subunit eta (Q5R5C8)|Evalue: 0.0	1123	59613	22 (17)	41.9	539	5.92	LAFASGDHEVSGRQLVMNNITACQVVADAVKSTLGPRGMDKMIVDNNGKTTISNDGATILKLLEIVHPAAKMLVDIAKSQDAEVGDGTTTVVLITADLLKQIKSFVEEGVHPQIIIKSFRKATELAIEKIKELEVKINKGDQQNLRSVLEKCAQTTLSSKLLAMQRNFFSKMAVDAVLMLDELLPLDMIGIKKVTGGALEESLLVAGVAFKKTFSYAGFEMQPKKYDKPSIALLNVELELKAEKENAEVRVNSVEEYQKVVDAEWTILYEKLEAIHASGAKVVLSRLPIGDVATQWFADRDLFCAGRVPEEDLKRVQKACGGSVQTSVQKLTTDVLGTCGQFEERQVGSERYNFFTDCPLTKACTMVLRGGAEQFIDEMERSLHDAIMIVRRALKHDAV…	1.77	3.46
	AS11, 10	EZ759772	contig04755:1:285:1|similar to T-complex protein 1 subunit alpha (P12613)|Evalue: 4e-31	59	10464	2	20.2	94	5.77	AVNAAQDATECVAKLRAYHNGSQTKLEHEHLKWYGLDLTSGDVRDNKKAGVLEPTLSKVKSLKFATEAAITILRIDDMIKLEDDSKKYGGHDDD	0.77	1.1
	EES10	EZ759772	contig04755:1:285:1|similar to T-complex protein 1 subunit alpha (P12613)|Evalue: 4e-31	111	10464	4 (2)	24.5	94	5.77	AVNAAQDATECVAKLRAYHNGSQTKLEHEHLKWYGLDLTSGDVRDNKKAGVLEPTLSKVKSLKFATEAAITILRIDDMIKLEDDSKKYGGHDDD	0.77	0.77
	TS11	EZ759772	contig04755:1:285:1|similar to T-complex protein 1 subunit alpha (P12613)|Evalue: 4e-31	108	10464	3 (2)	24.5	94	5.77	AVNAAQDATECVAKLRAYHNGSQTKLEHEHLKWYGLDLTSGDVRDNKKAGVLEPTLSKVKSLKFATEAAITILRIDDMIKLEDDSKKYGGHDDD	0.77	0.77
	AS11, 10, 18	EZ759771	contig04754:1:1443:1|similar to T-complex protein 1 subunit alpha A (P11984)|Evalue: 0.0	736	52323	15 (12)	32.2	481	6.47	LHFQNLDFCLFRPLFVNLVTQISVRKMSGASALLSLPGERTSGQNVRSQNVMAVSAIANIVKSSLGPVGLDKMLVDDIGDVTITNDGATILKLLEVEHPAAKILCELADLQDKEVGDGTTSVVIFAAELLKGAEELVKQKIHPTTIISGYLLACREAVKYIQEHLVIGVEDLGRETILNVARTSMSSKIIGPDSDFFGNMVVDAATAVRFSDGKGGYKVPIKAVNVLKAHGKSSRESILVPGYALNCVIASQQMPKKITNAKIACLDFGLMKAKMAFGVQVLVTDPSKLEDIRKREVDITKERIQKIINAGANVIISSGGIDDLNVKYFVESGAMGIRRCKSSDLKRIAKATGATFLMSLANLDGEESFDASFLGHAEEVIQERVCDEELILIKGTKAR…	1.21	1.9
	EES10	EZ759771	contig04754:1:1443:1|similar to T-complex protein 1 subunit alpha A (P11984)|Evalue: 0.0	1267	52323	26 (19)	50.9	481	6.47	LHFQNLDFCLFRPLFVNLVTQISVRKMSGASALLSLPGERTSGQNVRSQNVMAVSAIANIVKSSLGPVGLDKMLVDDIGDVTITNDGATILKLLEVEHPAAKILCELADLQDKEVGDGTTSVVIFAAELLKGAEELVKQKIHPTTIISGYLLACREAVKYIQEHLVIGVEDLGRETILNVARTSMSSKIIGPDSDFFGNMVVDAATAVRFSDGKGGYKVPIKAVNVLKAHGKSSRESILVPGYALNCVIASQQMPKKITNAKIACLDFGLMKAKMAFGVQVLVTDPSKLEDIRKREVDITKERIQKIINAGANVIISSGGIDDLNVKYFVESGAMGIRRCKSSDLKRIAKATGATFLMSLANLDGEESFDASFLGHAEEVIQERVCDEELILIKGTKAR…	2.84	2.84
	TS11, 10	EZ759771	contig04754:1:1443:1|similar to T-complex protein 1 subunit alpha A (P11984)|Evalue: 0.0	1017	52323	23 (16)	42.8	481	6.47	LHFQNLDFCLFRPLFVNLVTQISVRKMSGASALLSLPGERTSGQNVRSQNVMAVSAIANIVKSSLGPVGLDKMLVDDIGDVTITNDGATILKLLEVEHPAAKILCELADLQDKEVGDGTTSVVIFAAELLKGAEELVKQKIHPTTIISGYLLACREAVKYIQEHLVIGVEDLGRETILNVARTSMSSKIIGPDSDFFGNMVVDAATAVRFSDGKGGYKVPIKAVNVLKAHGKSSRESILVPGYALNCVIASQQMPKKITNAKIACLDFGLMKAKMAFGVQVLVTDPSKLEDIRKREVDITKERIQKIINAGANVIISSGGIDDLNVKYFVESGAMGIRRCKSSDLKRIAKATGATFLMSLANLDGEESFDASFLGHAEEVIQERVCDEELILIKGTKAR…	2.19	2.47
	AS10	EZ762988	contig26285:1:350:2|similar to T-complex protein 1 subunit gamma (P80318)|Evalue: 2e-37	200	12810	5 (3)	35.3	116	10.19	ENSSRFRSSDLNXFAQFSVPKVNSTKMMLGNRPILVLKENTKRENGRKVQTGNIVAAKNVADIIRTSLGPRAMLKMLMDPTGGIVITNDGNAILREIIVQHPAAKSMIEISRTQDE	2.28	2.28
	EES9, 10	EZ762988	contig26285:1:350:2|similar to T-complex protein 1 subunit gamma (P80318)|Evalue: 2e-37	86	12810	2	15.5	116	10.19	ENSSRFRSSDLNXFAQFSVPKVNSTKMMLGNRPILVLKENTKRENGRKVQTGNIVAAKNVADIIRTSLGPRAMLKMLMDPTGGIVITNDGNAILREIIVQHPAAKSMIEISRTQDE	0.27	0.54
	TS10	EZ762988	contig26285:1:350:2|similar to T-complex protein 1 subunit gamma (P80318)|Evalue: 2e-37	184	12810	3	32.8	116	10.19	ENSSRFRSSDLNXFAQFSVPKVNSTKMMLGNRPILVLKENTKRENGRKVQTGNIVAAKNVADIIRTSLGPRAMLKMLMDPTGGIVITNDGNAILREIIVQHPAAKSMIEISRTQDE	1.04	1.04
	AS10, 12, 15, 17	EZ762556	contig24467:1:1384:2|similar to T-complex protein 1 subunit gamma (P48605)|Evalue: 0.0	984	51195	22 (16)	43.7	460	6.06	DGTTSVIVLAGEMLAAAEPFLQQQLHPTVIISAFRQALEDMIAIVRDQASIPVDASNKDEMLKIIGSCLGTKMLGQWGNMAYELAYKAVKTVFLDENGRREVDLKRYAKVEKIPGGSVEDSRVLDGVMINKDVTHPKMKRRIENPRIVLLDCNLEYKKAESQTNIEISKEEDFTRILQLEEEYIKQICDDIIRVKPTVVITEKGVSDLAQHYLAKAGITAIRRVRKTDNNRIGRACGARIVNRTDELREEDVGTQAALFNIEKIGDEYWTFITGCKEPKACTILLRGGSKDVLNEMDRNLNDALNCARNVLLEPKIVAGGGAIEMAVSQLIAKKAEGITGVRQWPYAAVGAALEVIPRTLAQNCGANPIRTLTALRAKHATAGNSTWGINGVTGELVDM…	2.08	2.26
	EES9, 10, 12	EZ762556	contig24467:1:1384:2|similar to T-complex protein 1 subunit gamma (P48605)|Evalue: 0.0	1077	51195	24 (19)	49.1	460	6.06	DGTTSVIVLAGEMLAAAEPFLQQQLHPTVIISAFRQALEDMIAIVRDQASIPVDASNKDEMLKIIGSCLGTKMLGQWGNMAYELAYKAVKTVFLDENGRREVDLKRYAKVEKIPGGSVEDSRVLDGVMINKDVTHPKMKRRIENPRIVLLDCNLEYKKAESQTNIEISKEEDFTRILQLEEEYIKQICDDIIRVKPTVVITEKGVSDLAQHYLAKAGITAIRRVRKTDNNRIGRACGARIVNRTDELREEDVGTQAALFNIEKIGDEYWTFITGCKEPKACTILLRGGSKDVLNEMDRNLNDALNCARNVLLEPKIVAGGGAIEMAVSQLIAKKAEGITGVRQWPYAAVGAALEVIPRTLAQNCGANPIRTLTALRAKHATAGNSTWGINGVTGELVDM…	2.48	2.67
	TS10	EZ762556	contig24467:1:1384:2|similar to T-complex protein 1 subunit gamma (P48605)|Evalue: 0.0	1149	51195	32 (18)	47.8	460	6.06	DGTTSVIVLAGEMLAAAEPFLQQQLHPTVIISAFRQALEDMIAIVRDQASIPVDASNKDEMLKIIGSCLGTKMLGQWGNMAYELAYKAVKTVFLDENGRREVDLKRYAKVEKIPGGSVEDSRVLDGVMINKDVTHPKMKRRIENPRIVLLDCNLEYKKAESQTNIEISKEEDFTRILQLEEEYIKQICDDIIRVKPTVVITEKGVSDLAQHYLAKAGITAIRRVRKTDNNRIGRACGARIVNRTDELREEDVGTQAALFNIEKIGDEYWTFITGCKEPKACTILLRGGSKDVLNEMDRNLNDALNCARNVLLEPKIVAGGGAIEMAVSQLIAKKAEGITGVRQWPYAAVGAALEVIPRTLAQNCGANPIRTLTALRAKHATAGNSTWGINGVTGELVDM…	2.71	2.71
	AS11, 10, 14-16	EZ762553	contig24462:119:1723:2|similar to T-complex protein 1 subunit beta (P78371)|Evalue: 0.0	781	58563	13 (11)	28.3	534	5.88	MSALNPIQILSPEGTEERAENARLSSFVGAITIGDLVKTTLGPKGMDKILVFAGRKDEIQVTNDGATILKNVGVDNPAAKVLVDISQVQDSEVGDGTTSVAVFCSELLKEAEKLISQRLHPQTIIAGWRKATVAAQEALSKASRSNRDEDEKFREDLMNIARTTLSSKILNQYKDFFSKMAVDAVLRLRESANLEHIQIIKKTGGQLSDSFLDEGYLLMKHPGVNQPKRIENAKILIANTPMDTDKIKIFGSRVRVDSTAKVAELEAAEKQKMKDKVDKILKHGINVFINRQLIYNYPEQLFADANIMAIEHADFDGIERLAFVLGGEIVSTFDHPEKVKLGSCKLIEEVLIGDEKMLKFSGVAVGEACSIVLRGATQQIVDEAERSLHDALCVLQQTV…	0.93	2.32
	EES10, 9-11, 13, 14	EZ762553	contig24462:119:1723:2|similar to T-complex protein 1 subunit beta (P78371)|Evalue: 0.0	1489	58563	33 (20)	50.2	534	5.88	MSALNPIQILSPEGTEERAENARLSSFVGAITIGDLVKTTLGPKGMDKILVFAGRKDEIQVTNDGATILKNVGVDNPAAKVLVDISQVQDSEVGDGTTSVAVFCSELLKEAEKLISQRLHPQTIIAGWRKATVAAQEALSKASRSNRDEDEKFREDLMNIARTTLSSKILNQYKDFFSKMAVDAVLRLRESANLEHIQIIKKTGGQLSDSFLDEGYLLMKHPGVNQPKRIENAKILIANTPMDTDKIKIFGSRVRVDSTAKVAELEAAEKQKMKDKVDKILKHGINVFINRQLIYNYPEQLFADANIMAIEHADFDGIERLAFVLGGEIVSTFDHPEKVKLGSCKLIEEVLIGDEKMLKFSGVAVGEACSIVLRGATQQIVDEAERSLHDALCVLQQTV…	2.51	3.69
	TS11, 10	EZ762553	contig24462:119:1723:2|similar to T-complex protein 1 subunit beta (P78371)|Evalue: 0.0	1070	58563	25 (16)	38.4	534	5.88	MSALNPIQILSPEGTEERAENARLSSFVGAITIGDLVKTTLGPKGMDKILVFAGRKDEIQVTNDGATILKNVGVDNPAAKVLVDISQVQDSEVGDGTTSVAVFCSELLKEAEKLISQRLHPQTIIAGWRKATVAAQEALSKASRSNRDEDEKFREDLMNIARTTLSSKILNQYKDFFSKMAVDAVLRLRESANLEHIQIIKKTGGQLSDSFLDEGYLLMKHPGVNQPKRIENAKILIANTPMDTDKIKIFGSRVRVDSTAKVAELEAAEKQKMKDKVDKILKHGINVFINRQLIYNYPEQLFADANIMAIEHADFDGIERLAFVLGGEIVSTFDHPEKVKLGSCKLIEEVLIGDEKMLKFSGVAVGEACSIVLRGATQQIVDEAERSLHDALCVLQQTV…	1.67	2.6
	AS10, 11	EZ762107	contig22788:1:784:2|similar to T-complex protein 1 subunit epsilon (P48643)|Evalue: 6e-116	535	29040	14 (11)	54.6	260	5.68	EQKKFDEMVQMVKDTGANLVICQWGFDDEANHLLLQRELPAVRWVGGPEIELIAIATGGRIVPRFEELSKEKLGLAGTVRELSFGTAKDRMLAIEDCPNSKAVTIFIRGGNKMIVEEAKRSLHDALCVIRNLVRDSRIVYGGGAADLWCANVVTEAADKVRGLEQYAYRSFADALEQIPLSLAENSGLQPIDAVSQVKSRQITEKNPRLGVDCMGRGTNDMKEQAVIETLIGKKQQILLATQLVKMILKIDDVRLPGEKE	2.67	3.81
	EES10, 9	EZ762107	contig22788:1:784:2|similar to T-complex protein 1 subunit epsilon (P48643)|Evalue: 6e-116	498	29040	14 (10)	51.5	260	5.68	EQKKFDEMVQMVKDTGANLVICQWGFDDEANHLLLQRELPAVRWVGGPEIELIAIATGGRIVPRFEELSKEKLGLAGTVRELSFGTAKDRMLAIEDCPNSKAVTIFIRGGNKMIVEEAKRSLHDALCVIRNLVRDSRIVYGGGAADLWCANVVTEAADKVRGLEQYAYRSFADALEQIPLSLAENSGLQPIDAVSQVKSRQITEKNPRLGVDCMGRGTNDMKEQAVIETLIGKKQQILLATQLVKMILKIDDVRLPGEKE	2.29	2.53
	TS10, 11	EZ762107	contig22788:1:784:2|similar to T-complex protein 1 subunit epsilon (P48643)|Evalue: 6e-116	510	29040	13 (11)	56.2	260	5.68	EQKKFDEMVQMVKDTGANLVICQWGFDDEANHLLLQRELPAVRWVGGPEIELIAIATGGRIVPRFEELSKEKLGLAGTVRELSFGTAKDRMLAIEDCPNSKAVTIFIRGGNKMIVEEAKRSLHDALCVIRNLVRDSRIVYGGGAADLWCANVVTEAADKVRGLEQYAYRSFADALEQIPLSLAENSGLQPIDAVSQVKSRQITEKNPRLGVDCMGRGTNDMKEQAVIETLIGKKQQILLATQLVKMILKIDDVRLPGEKE	3.09	3.81
	AS10, 11, 13, 15	EZ761853	contig21263:1:1713:1|similar to T-complex protein 1 subunit delta (P53451)|Evalue: 0.0	634	62058	18 (13)	35.4	570	6.66	VEERQTKGLLLFGLHQFFDLFGFSLQFSSVHTSTMAAAAAPLIADMSGSNSQFKNRHKPTEVRMSNIQAGKCIADAIRTSLGPRGMDKMIQAGKGDVTITNDGATILKQMKVIHPAARMLVELSQAQDVQAGDGTTSVVIVAGALMEAAAKLLERGIHPTIISESFQEAALKSVEILRNMSIPVDLKDRASLIKIAKTSLNSKVVSQYSDQLAPLAVDAVLKVIDPAKPSYVDXNDVKVIKTLGGTVEETELVEGLVLGHKTQGPPDAPTKVEKAKIALIQFXSIATEDRHGKPSDISDYTQMDRILREERAYLLNIVKQIKKAGCNVLLIQKSILRDAVTDMALHYLAKMKIMVIKDIERDEVEFISKTLGLRPIASLDHFVAESLASADLVEQFDSG…	1.06	1.45
	EES10, 9	EZ761853	contig21263:1:1713:1|similar to T-complex protein 1 subunit delta (P53451)|Evalue: 0.0	1097	62058	23 (16)	47.2	570	6.66	VEERQTKGLLLFGLHQFFDLFGFSLQFSSVHTSTMAAAAAPLIADMSGSNSQFKNRHKPTEVRMSNIQAGKCIADAIRTSLGPRGMDKMIQAGKGDVTITNDGATILKQMKVIHPAARMLVELSQAQDVQAGDGTTSVVIVAGALMEAAAKLLERGIHPTIISESFQEAALKSVEILRNMSIPVDLKDRASLIKIAKTSLNSKVVSQYSDQLAPLAVDAVLKVIDPAKPSYVDXNDVKVIKTLGGTVEETELVEGLVLGHKTQGPPDAPTKVEKAKIALIQFXSIATEDRHGKPSDISDYTQMDRILREERAYLLNIVKQIKKAGCNVLLIQKSILRDAVTDMALHYLAKMKIMVIKDIERDEVEFISKTLGLRPIASLDHFVAESLASADLVEQFDSG…	1.67	2.26
	TS10, 11	EZ761853	contig21263:1:1713:1|similar to T-complex protein 1 subunit delta (P53451)|Evalue: 0.0	604	62058	15 (13)	37.7	570	6.66	VEERQTKGLLLFGLHQFFDLFGFSLQFSSVHTSTMAAAAAPLIADMSGSNSQFKNRHKPTEVRMSNIQAGKCIADAIRTSLGPRGMDKMIQAGKGDVTITNDGATILKQMKVIHPAARMLVELSQAQDVQAGDGTTSVVIVAGALMEAAAKLLERGIHPTIISESFQEAALKSVEILRNMSIPVDLKDRASLIKIAKTSLNSKVVSQYSDQLAPLAVDAVLKVIDPAKPSYVDXNDVKVIKTLGGTVEETELVEGLVLGHKTQGPPDAPTKVEKAKIALIQFXSIATEDRHGKPSDISDYTQMDRILREERAYLLNIVKQIKKAGCNVLLIQKSILRDAVTDMALHYLAKMKIMVIKDIERDEVEFISKTLGLRPIASLDHFVAESLASADLVEQFDSG…	0.96	1.64
	AS10, 11, 15, 17, 18	EZ761768	contig20686:1:1600:2|similar to T-complex protein 1 subunit theta (P42932)|Evalue: 0.0	741	57873	17 (15)	32.6	533	5.95	TAPGFASMLSEGSRYYSGTDETVLRNIEAVRQLTQIVRTSYGPRGLSKIVVTHLGKLLVTNDAATIIKELENNHPGVKLVIMASEMQEREIGDGTNFVLIFAGALLDEAEELIRMGIPVPEIVDGYELALSKALELLDGLVCAKVTNFRDMDQIKKALKPSIASKQYGNEDFLTNLIAEACASILPEKGLSFNVDNVRTCKILGSGLFASTVMRGMVFKRDIEGDVTKASDAKVAVYSCPVDSKQTETKGTVLIKNASELLNYSKSEEDMLEKQIKAIADSGARVVVSGGKVGDLALHYLNKYKLMTIRLTSKFDVRRVSKTVGAMVLGQLSAPTADDLGHCDSVYIDEIGDTSVVVFKQXKKESGSIATVILRGSTDNSLDDLERSVDDAVNNFKALT…	1.42	3.21
	EES10, 9, 14, 18	EZ761768	contig20686:1:1600:2|similar to T-complex protein 1 subunit theta (P42932)|Evalue: 0.0	1006	57873	25 (19)	41.3	533	5.95	TAPGFASMLSEGSRYYSGTDETVLRNIEAVRQLTQIVRTSYGPRGLSKIVVTHLGKLLVTNDAATIIKELENNHPGVKLVIMASEMQEREIGDGTNFVLIFAGALLDEAEELIRMGIPVPEIVDGYELALSKALELLDGLVCAKVTNFRDMDQIKKALKPSIASKQYGNEDFLTNLIAEACASILPEKGLSFNVDNVRTCKILGSGLFASTVMRGMVFKRDIEGDVTKASDAKVAVYSCPVDSKQTETKGTVLIKNASELLNYSKSEEDMLEKQIKAIADSGARVVVSGGKVGDLALHYLNKYKLMTIRLTSKFDVRRVSKTVGAMVLGQLSAPTADDLGHCDSVYIDEIGDTSVVVFKQXKKESGSIATVILRGSTDNSLDDLERSVDDAVNNFKALT…	2.2	2.88
	TS11, 10, 15	EZ761768	contig20686:1:1600:2|similar to T-complex protein 1 subunit theta (P42932)|Evalue: 0.0	895	57873	22 (18)	37.7	533	5.95	TAPGFASMLSEGSRYYSGTDETVLRNIEAVRQLTQIVRTSYGPRGLSKIVVTHLGKLLVTNDAATIIKELENNHPGVKLVIMASEMQEREIGDGTNFVLIFAGALLDEAEELIRMGIPVPEIVDGYELALSKALELLDGLVCAKVTNFRDMDQIKKALKPSIASKQYGNEDFLTNLIAEACASILPEKGLSFNVDNVRTCKILGSGLFASTVMRGMVFKRDIEGDVTKASDAKVAVYSCPVDSKQTETKGTVLIKNASELLNYSKSEEDMLEKQIKAIADSGARVVVSGGKVGDLALHYLNKYKLMTIRLTSKFDVRRVSKTVGAMVLGQLSAPTADDLGHCDSVYIDEIGDTSVVVFKQXKKESGSIATVILRGSTDNSLDDLERSVDDAVNNFKALT…	1.86	2.72
	AS11, 10-12, 15, 16	EZ761488	contig19267:1:1403:3|similar to T-complex protein 1 subunit zeta (P80317)|Evalue: 1e-161	590	52151	13 (12)	30.5	466	6.43	KHPIASLIARTCTAQDDVTGDGTTSTVLFIGQLLQKTREYIISGVHPRFLVEGFEVARVKALEILDKISVKCGAEREQLLDVARTSLRTKMHLSVADHLAGIVTDAVLGIRQEKEKIDLHMVEIMEMQQKTEMDTQLIRGLVLDHGARHPDMPKRIDNAYILTCNVSMEYEKTEVNSEFFYKTPEEREKLVEAEKQFILQRVNQVIALKQKVCGSGEDKGFVVVNQKGIDPTSLDMLAREGIMALRRAKRRNMERLVLACGGAAVNSFDEMTTEVLGFAGSVYEQVLGEDKFTFIEDCKNPKSVSILIKGPNKHTITQSKEAIRKGLRAVFNAIEDGRIVPGAGAFEFAVHQSLRALMNSDESKLGKSALGVKAFAEAILIIPRTLLQNSGFDWHDFSP…	1.09	2.11
	EES10, 9	EZ761488	contig19267:1:1403:3|similar to T-complex protein 1 subunit zeta (P80317)|Evalue: 1e-161	916	52151	23 (17)	50	466	6.43	KHPIASLIARTCTAQDDVTGDGTTSTVLFIGQLLQKTREYIISGVHPRFLVEGFEVARVKALEILDKISVKCGAEREQLLDVARTSLRTKMHLSVADHLAGIVTDAVLGIRQEKEKIDLHMVEIMEMQQKTEMDTQLIRGLVLDHGARHPDMPKRIDNAYILTCNVSMEYEKTEVNSEFFYKTPEEREKLVEAEKQFILQRVNQVIALKQKVCGSGEDKGFVVVNQKGIDPTSLDMLAREGIMALRRAKRRNMERLVLACGGAAVNSFDEMTTEVLGFAGSVYEQVLGEDKFTFIEDCKNPKSVSILIKGPNKHTITQSKEAIRKGLRAVFNAIEDGRIVPGAGAFEFAVHQSLRALMNSDESKLGKSALGVKAFAEAILIIPRTLLQNSGFDWHDFSP…	2.01	2.07
	TS11, 10	EZ761488	contig19267:1:1403:3|similar to T-complex protein 1 subunit zeta (P80317)|Evalue: 1e-161	821	52151	22 (18)	48.5	466	6.43	KHPIASLIARTCTAQDDVTGDGTTSTVLFIGQLLQKTREYIISGVHPRFLVEGFEVARVKALEILDKISVKCGAEREQLLDVARTSLRTKMHLSVADHLAGIVTDAVLGIRQEKEKIDLHMVEIMEMQQKTEMDTQLIRGLVLDHGARHPDMPKRIDNAYILTCNVSMEYEKTEVNSEFFYKTPEEREKLVEAEKQFILQRVNQVIALKQKVCGSGEDKGFVVVNQKGIDPTSLDMLAREGIMALRRAKRRNMERLVLACGGAAVNSFDEMTTEVLGFAGSVYEQVLGEDKFTFIEDCKNPKSVSILIKGPNKHTITQSKEAIRKGLRAVFNAIEDGRIVPGAGAFEFAVHQSLRALMNSDESKLGKSALGVKAFAEAILIIPRTLLQNSGFDWHDFSP…	2.2	2.4
	AS10, 11, 17	EZ761485	contig19251:1970:2808:2|similar to T-complex protein 1 subunit epsilon (P80316)|Evalue: 5e-109	580	30483	10 (8)	44.8	279	6.02	MDAVGHLVFDEFGKPFIIMKDQGKKRRLTGIDALKSHIIAAKAVSSVIRSSLGPRGLDKILVGPDGDVTISNDGATIMKEMKPSHEIAKLMVELAKSQDDEIGDGTTSVVVMAGALLEQADTLIDKGIHPIRIADGYEAAAHLAVKHLDEIAETYTFSKDNLDPLIETAVTTLGSKIVSRFGRQLAEIAVQAILAVADLERKDVNFENIKIVTKVGGKLEDTMLIKGVLVDKDFSHPQMPKLIKDAKMAILTCPFEPPKPKTKNKLDIVNVEDYQKLRE	1.29	2.69
	EES10, 9-11	EZ761485	contig19251:1970:2808:2|similar to T-complex protein 1 subunit epsilon (P80316)|Evalue: 5e-109	626	30483	16 (10)	48.7	279	6.02	MDAVGHLVFDEFGKPFIIMKDQGKKRRLTGIDALKSHIIAAKAVSSVIRSSLGPRGLDKILVGPDGDVTISNDGATIMKEMKPSHEIAKLMVELAKSQDDEIGDGTTSVVVMAGALLEQADTLIDKGIHPIRIADGYEAAAHLAVKHLDEIAETYTFSKDNLDPLIETAVTTLGSKIVSRFGRQLAEIAVQAILAVADLERKDVNFENIKIVTKVGGKLEDTMLIKGVLVDKDFSHPQMPKLIKDAKMAILTCPFEPPKPKTKNKLDIVNVEDYQKLRE	2.12	2.91
	TS10, 10-13, 17	EZ761485	contig19251:1970:2808:2|similar to T-complex protein 1 subunit epsilon (P80316)|Evalue: 5e-109	586	30483	12 (9)	50.2	279	6.02	MDAVGHLVFDEFGKPFIIMKDQGKKRRLTGIDALKSHIIAAKAVSSVIRSSLGPRGLDKILVGPDGDVTISNDGATIMKEMKPSHEIAKLMVELAKSQDDEIGDGTTSVVVMAGALLEQADTLIDKGIHPIRIADGYEAAAHLAVKHLDEIAETYTFSKDNLDPLIETAVTTLGSKIVSRFGRQLAEIAVQAILAVADLERKDVNFENIKIVTKVGGKLEDTMLIKGVLVDKDFSHPQMPKLIKDAKMAILTCPFEPPKPKTKNKLDIVNVEDYQKLRE	1.81	3.09
Calreticulin family	AS9, 8	EZ761166	contig17826:1:1166:3|similar to Calnexin (P24643)|Evalue: 5e-62	202	43640	5 (4)	13.7	388	4.66	NSFRVNLDQKTIGSGSLLSDFTPPVLPSKEIEDKADVRPAGXDDRAKIPDPSAVKPDTWDEKAPAKVRDPSAVKPSGWLEEESEYISDPNAEKPDDWEDEMDGEWEASKIKNPACTVGCGPWLAPMIDNPTCANGGCGPWSAPMIDNPNYKGKWAPRRIPNPDYFEDADPYKMTPIDAIALELWSISSDVFFDNILVTDDVNVADKIAEQTWAVKHRMESSAGESTVNWMYVGIGVAVVGGLIIIFVAWLCLRTPVDFVTQLKMEEEAEKAKRRARGEVVEDEPATVEPDDSDRPLLREKRTKDRSETEPVRDREEEWRRSQAEKQKPQDSRKSPVPRPDRETAQKPVRESVGTSESEVDEIDAELVSGSTHSEPSEPETGKKVTRRR	0.44	0.6
	EES8, 12	EZ761166	contig17826:1:1166:3|similar to Calnexin (P24643)|Evalue: 5e-62	296	43640	8 (6)	17.5	388	4.66	NSFRVNLDQKTIGSGSLLSDFTPPVLPSKEIEDKADVRPAGXDDRAKIPDPSAVKPDTWDEKAPAKVRDPSAVKPSGWLEEESEYISDPNAEKPDDWEDEMDGEWEASKIKNPACTVGCGPWLAPMIDNPTCANGGCGPWSAPMIDNPNYKGKWAPRRIPNPDYFEDADPYKMTPIDAIALELWSISSDVFFDNILVTDDVNVADKIAEQTWAVKHRMESSAGESTVNWMYVGIGVAVVGGLIIIFVAWLCLRTPVDFVTQLKMEEEAEKAKRRARGEVVEDEPATVEPDDSDRPLLREKRTKDRSETEPVRDREEEWRRSQAEKQKPQDSRKSPVPRPDRETAQKPVRESVGTSESEVDEIDAELVSGSTHSEPSEPETGKKVTRRR	0.55	0.63
	TS9	EZ761166	contig17826:1:1166:3|similar to Calnexin (P24643)|Evalue: 5e-62	145	43640	4 (3)	14.2	388	4.66	NSFRVNLDQKTIGSGSLLSDFTPPVLPSKEIEDKADVRPAGXDDRAKIPDPSAVKPDTWDEKAPAKVRDPSAVKPSGWLEEESEYISDPNAEKPDDWEDEMDGEWEASKIKNPACTVGCGPWLAPMIDNPTCANGGCGPWSAPMIDNPNYKGKWAPRRIPNPDYFEDADPYKMTPIDAIALELWSISSDVFFDNILVTDDVNVADKIAEQTWAVKHRMESSAGESTVNWMYVGIGVAVVGGLIIIFVAWLCLRTPVDFVTQLKMEEEAEKAKRRARGEVVEDEPATVEPDDSDRPLLREKRTKDRSETEPVRDREEEWRRSQAEKQKPQDSRKSPVPRPDRETAQKPVRESVGTSESEVDEIDAELVSGSTHSEPSEPETGKKVTRRR	0.24	0.24
	AS9	EZ760935	contig16173:1:541:3|similar to Calnexin (P27824)|Evalue: 3e-11	60	20153	2	15.6	179	6.4	CFWVKVKVGVLVFLAISLLTFSGLHCVSAQKLTVINVGSVAXLLRTAIVAIVYTTGKMWFCRSLLLIAALLQLSLMSIVQCDDEPETSIEAPPVTPELPNLYEEPKVTSAHFFDAFHSQHDFEKSWIRSQSRKDKSDITETEKYDGEWSVEPTHIQRMSGDNALVLKSAARHHGIAAKL	0.36	0.36
	EES8	EZ760935	contig16173:1:541:3|similar to Calnexin (P27824)|Evalue: 3e-11	74	20153	2	15.6	179	6.4	CFWVKVKVGVLVFLAISLLTFSGLHCVSAQKLTVINVGSVAXLLRTAIVAIVYTTGKMWFCRSLLLIAALLQLSLMSIVQCDDEPETSIEAPPVTPELPNLYEEPKVTSAHFFDAFHSQHDFEKSWIRSQSRKDKSDITETEKYDGEWSVEPTHIQRMSGDNALVLKSAARHHGIAAKL	0.36	0.36
	AS12, 10-14, 16	EZ761296	contig18504:154:1359:1|similar to Calreticulin (Q4R6K8)|Evalue: 4e-127	1370	46442	63 (24)	73.6	401	4.66	MLGLSVVVTALLLVSTYADVYFKEQFLDNKWEDRWVQSEHSGKEWGKFVWTAGKFYGDADLNKGIQTSQDARFYGLSAAFPKFTNKDKPLVIQFSVKHEQNIDCGGGYVKVFPSTMDQKDMHGESPYHVMFGPDICGPGTKKVHVILTYKGKNYLTKKNIRCKDDEYTHVYTLILNPDNSYVVKIDNKEEEKGTIEEDWDILPSKTIKDPNAKKPSQDEWDERETIPDVEDKKPEDWDKPQHIADPEAKKPEDWDDEMDGTWEPAQIENPDYKGEWKAREIPNPAYKGTWVHPEVPNPEYSSEPTLYKFDDLGVIGFDLWQVKSGTIFDDIIITDDIKAAEDFANDTWGKTHEAEKKMKEKLDDEEKKKSETDTKKDEEFNAELPKTDDDDHDHDADHD…	12.61	19.56
	EES11, 9-13, 17, 19	EZ761296	contig18504:154:1359:1|similar to Calreticulin (Q4R6K8)|Evalue: 4e-127	1250	46442	52 (23)	73.1	401	4.66	MLGLSVVVTALLLVSTYADVYFKEQFLDNKWEDRWVQSEHSGKEWGKFVWTAGKFYGDADLNKGIQTSQDARFYGLSAAFPKFTNKDKPLVIQFSVKHEQNIDCGGGYVKVFPSTMDQKDMHGESPYHVMFGPDICGPGTKKVHVILTYKGKNYLTKKNIRCKDDEYTHVYTLILNPDNSYVVKIDNKEEEKGTIEEDWDILPSKTIKDPNAKKPSQDEWDERETIPDVEDKKPEDWDKPQHIADPEAKKPEDWDDEMDGTWEPAQIENPDYKGEWKAREIPNPAYKGTWVHPEVPNPEYSSEPTLYKFDDLGVIGFDLWQVKSGTIFDDIIITDDIKAAEDFANDTWGKTHEAEKKMKEKLDDEEKKKSETDTKKDEEFNAELPKTDDDDHDHDADHD…	6.86	10.14
	TS12, 10-16	EZ761296	contig18504:154:1359:1|similar to Calreticulin (Q4R6K8)|Evalue: 4e-127	1503	46442	74 (26)	75.1	401	4.66	MLGLSVVVTALLLVSTYADVYFKEQFLDNKWEDRWVQSEHSGKEWGKFVWTAGKFYGDADLNKGIQTSQDARFYGLSAAFPKFTNKDKPLVIQFSVKHEQNIDCGGGYVKVFPSTMDQKDMHGESPYHVMFGPDICGPGTKKVHVILTYKGKNYLTKKNIRCKDDEYTHVYTLILNPDNSYVVKIDNKEEEKGTIEEDWDILPSKTIKDPNAKKPSQDEWDERETIPDVEDKKPEDWDKPQHIADPEAKKPEDWDDEMDGTWEPAQIENPDYKGEWKAREIPNPAYKGTWVHPEVPNPEYSSEPTLYKFDDLGVIGFDLWQVKSGTIFDDIIITDDIKAAEDFANDTWGKTHEAEKKMKEKLDDEEKKKSETDTKKDEEFNAELPKTDDDDHDHDADHD…	10.08	17.54
AHA1 family	EES12	EZ759475	contig03076:1:682:1|similar to Activator of 90 kDa heat shock protein ATPase homolog 1 (O95433)|Evalue: 2e-30	84	26358	3	9.7	227	5.96	KRRSTFFQDFFEHLDSKFWRPSTKAIRYIGLSFNSITVKRTDLQTSAEGSKRPESSLLGRAKQTKNGEXXGEGDPRWIVEERPDATNVNNWHWTEKNATEWSKSRLRELLEKLQIDDEKVGACEVKKLSEIKGEAFINNRKSKLIYFYEWQIDMEVDWXXVVGETTAYEGKAKIENLSEENSIDEVNVEVSVSNSSSAAMQLKELMRKRGADLIRKQLDIYLAELKE	0.27	0.27
Antioxidant proteins
Cu-Zn superoxide dismutase family	AS19, 17-20	EZ761032	contig17128:1:666:1|similar to Superoxide dismutase [Cu-Zn] (Q8HXQ3)|Evalue: 5e-52	512	23719	25 (7)	37.1	221	6.16	VVALLKQSPVHTVLRPSFAIQSSYVMEAVKQFFTGEGGFKAIAVLVGDSPVKGVVKFTQAGPHAPVKVCGELNGLAPGQHGFHVHQFGDHTNGCTSAGAHFNPEGKEHGAPQDDNRHVGDLGNITADQNGAAKFEITDSKISLNGEYSIFGRSIVVHEHPDDLGRGGNDESKKTGNAGGRLACGVIXSREAKRLISIDSSVLDNWVFGFCLDMIHFDMTFG	4.55	7.3
	EES17, 16-20, 23, 24	EZ761032	contig17128:1:666:1|similar to Superoxide dismutase [Cu-Zn] (Q8HXQ3)|Evalue: 5e-52	573	23719	29 (8)	38.9	221	6.16	VVALLKQSPVHTVLRPSFAIQSSYVMEAVKQFFTGEGGFKAIAVLVGDSPVKGVVKFTQAGPHAPVKVCGELNGLAPGQHGFHVHQFGDHTNGCTSAGAHFNPEGKEHGAPQDDNRHVGDLGNITADQNGAAKFEITDSKISLNGEYSIFGRSIVVHEHPDDLGRGGNDESKKTGNAGGRLACGVIXSREAKRLISIDSSVLDNWVFGFCLDMIHFDMTFG	3.86	10.94
	TS19, 18-20	EZ761032	contig17128:1:666:1|similar to Superoxide dismutase [Cu-Zn] (Q8HXQ3)|Evalue: 5e-52	552	23719	33 (7)	37.1	221	6.16	VVALLKQSPVHTVLRPSFAIQSSYVMEAVKQFFTGEGGFKAIAVLVGDSPVKGVVKFTQAGPHAPVKVCGELNGLAPGQHGFHVHQFGDHTNGCTSAGAHFNPEGKEHGAPQDDNRHVGDLGNITADQNGAAKFEITDSKISLNGEYSIFGRSIVVHEHPDDLGRGGNDESKKTGNAGGRLACGVIXSREAKRLISIDSSVLDNWVFGFCLDMIHFDMTFG	4.55	5.72
	AS17, 13-20	EZ760584	contig10844:1:307:2|similar to Superoxide dismutase [Cu-Zn] (O73872)|Evalue: 7e-25	203	10508	4	65.3	101	6.02	CLNTGEHLNPMNRTHGGPTDAPNRHVGDLGNVVADSQGVATVNIVDPMVTLSPSPGAILGRAIVVHEKADDFGKGGDGQSRQDGNTGARLACGVVVYSNRQ	2.11	6.87
	EES15, 13-21	EZ760584	contig10844:1:307:2|similar to Superoxide dismutase [Cu-Zn] (O73872)|Evalue: 7e-25	421	10508	27 (7)	79.2	101	6.02	CLNTGEHLNPMNRTHGGPTDAPNRHVGDLGNVVADSQGVATVNIVDPMVTLSPSPGAILGRAIVVHEKADDFGKGGDGQSRQDGNTGARLACGVVVYSNRQ	16.06	29.04
	TS14, 13-20	EZ760584	contig10844:1:307:2|similar to Superoxide dismutase [Cu-Zn] (O73872)|Evalue: 7e-25	255	10508	10 (4)	65.3	101	6.02	CLNTGEHLNPMNRTHGGPTDAPNRHVGDLGNVVADSQGVATVNIVDPMVTLSPSPGAILGRAIVVHEKADDFGKGGDGQSRQDGNTGARLACGVVVYSNRQ	3.13	15.04
	AS19, 20	EZ760167	contig07268:293:706:2|similar to Superoxide dismutase [Cu-Zn] (Q8HXQ2)|Evalue: 2e-07	30	15341	1	5.1	138	9.33	MSQNKAFRTVRLNENSKIISEVPSVAMKVEKGRFVMVFPVDTVQFWSECSVEXGMSAITAGSILHLFTFFVSRLYSTLQQKYSSKMVNYPRVTSAVAVMKGDSPVKATVKFEQIDDKGGVRITGEMTGLPPGEHGFHV	0.22	0.44
	EES18, 19	EZ760167	contig07268:293:706:2|similar to Superoxide dismutase [Cu-Zn] (Q8HXQ2)|Evalue: 2e-07	221	15341	9 (5)	21.7	138	9.33	MSQNKAFRTVRLNENSKIISEVPSVAMKVEKGRFVMVFPVDTVQFWSECSVEXGMSAITAGSILHLFTFFVSRLYSTLQQKYSSKMVNYPRVTSAVAVMKGDSPVKATVKFEQIDDKGGVRITGEMTGLPPGEHGFHV	2.33	3.15
	TS19, 20	EZ760167	contig07268:293:706:2|similar to Superoxide dismutase [Cu-Zn] (Q8HXQ2)|Evalue: 2e-07	41	15341	1	5.1	138	9.33	MSQNKAFRTVRLNENSKIISEVPSVAMKVEKGRFVMVFPVDTVQFWSECSVEXGMSAITAGSILHLFTFFVSRLYSTLQQKYSSKMVNYPRVTSAVAVMKGDSPVKATVKFEQIDDKGGVRITGEMTGLPPGEHGFHV	0.22	0.44
	AS20, 18-21	EZ760117	contig06938:1:111:1|similar to Superoxide dismutase [Cu-Zn] (O46412)|Evalue: 2e-08	74	4060	2	70.3	37	5.97	TAKIDITDSLMSLMGEHSIVGRAIVVHERRDDLGRGL	2.65	7.12
	EES19, 18	EZ760117	contig06938:1:111:1|similar to Superoxide dismutase [Cu-Zn] (O46412)|Evalue: 2e-08	115	4060	8 (2)	70.3	37	5.97	TAKIDITDSLMSLMGEHSIVGRAIVVHERRDDLGRGL	12.33	24.66
	TS20, 19	EZ760117	contig06938:1:111:1|similar to Superoxide dismutase [Cu-Zn] (O46412)|Evalue: 2e-08	96	4060	3 (2)	70.3	37	5.97	TAKIDITDSLMSLMGEHSIVGRAIVVHERRDDLGRGL	2.65	5.3
	AS18, 16-19	EZ758914	contig00081:1:487:2|similar to Superoxide dismutase [Cu-Zn] (O73872)|Evalue: 1e-42	273	16902	13 (4)	28	161	6.42	SNYGGSRPMTMAAGPAIAVLSGPSEVKATIQLTQEGNNLRMVGDITGLTPGQHGYHIHEFGDLSNGCTSGGEHYNPEKNNHGSPQSKPRHRGDYGNINADASGNAHIDIKDSRISLAEVMGRMIIVHEKTDDLGQGGDAESLKTGNAGGRLACGVIGLKKP	1.49	4.38
	EES16, 1, 2, 15-18	EZ758914	contig00081:1:487:2|similar to Superoxide dismutase [Cu-Zn] (O73872)|Evalue: 1e-42	238	16902	9 (3)	22.4	161	6.42	SNYGGSRPMTMAAGPAIAVLSGPSEVKATIQLTQEGNNLRMVGDITGLTPGQHGYHIHEFGDLSNGCTSGGEHYNPEKNNHGSPQSKPRHRGDYGNINADASGNAHIDIKDSRISLAEVMGRMIIVHEKTDDLGQGGDAESLKTGNAGGRLACGVIGLKKP	1.08	3.68
	TS18, 16-19	EZ758914	contig00081:1:487:2|similar to Superoxide dismutase [Cu-Zn] (O73872)|Evalue: 1e-42	274	16902	12 (4)	28	161	6.42	SNYGGSRPMTMAAGPAIAVLSGPSEVKATIQLTQEGNNLRMVGDITGLTPGQHGYHIHEFGDLSNGCTSGGEHYNPEKNNHGSPQSKPRHRGDYGNINADASGNAHIDIKDSRISLAEVMGRMIIVHEKTDDLGQGGDAESLKTGNAGGRLACGVIGLKKP	1.99	3.88
	TS18, 17-19	EZ763167	contig27339:102:582:3|similar to Superoxide dismutase [Cu-Zn], chloroplastic (P07505)|Evalue: 4e-22	92	17315	2	13.8	160	5.93	MYKXXIGFERXNLRKVILEKVGKSDFWKMFSYVIFSALLCSAVYATGVQVTAPAVATLTGNGTAKGKVVLTQEAGGLKIVADLQGLSPGEHGFHIHEFGDMTNGCMSGGEHYNPDQKQHGPPTDTQDRHRGDYGNVNADSSGNAHFEQTDSCVSVSDVVG	0.43	0.83
	AS16	EZ762714	contig25087:1:383:2|similar to Copper chaperone for superoxide dismutase (O14618)|Evalue: 5e-29	85	13728	2	20.5	127	5.12	CEMAVEMTCGNCEAKVRKALEGVPGVHSVKTDLAEQKVFVETTLPSTQIQQIIEETGKKAIIRGVGAPGYQRAAAVVEFLGIGGVRGVTRFVQMDENRCVIDGTLDGLSPGLHGFAVCQNGDLSDGC	0.56	0.56
	EES15	EZ762714	contig25087:1:383:2|similar to Copper chaperone for superoxide dismutase (O14618)|Evalue: 5e-29	55	13728	2	26.8	127	5.12	CEMAVEMTCGNCEAKVRKALEGVPGVHSVKTDLAEQKVFVETTLPSTQIQQIIEETGKKAIIRGVGAPGYQRAAAVVEFLGIGGVRGVTRFVQMDENRCVIDGTLDGLSPGLHGFAVCQNGDLSDGC	0.56	0.56
	TS17, 16	EZ762714	contig25087:1:383:2|similar to Copper chaperone for superoxide dismutase (O14618)|Evalue: 5e-29	35	13728	1	6.3	127	5.12	CEMAVEMTCGNCEAKVRKALEGVPGVHSVKTDLAEQKVFVETTLPSTQIQQIIEETGKKAIIRGVGAPGYQRAAAVVEFLGIGGVRGVTRFVQMDENRCVIDGTLDGLSPGLHGFAVCQNGDLSDGC	0.25	0.5
iron/manganese superoxide dismutase family	AS17, 18	EZ762586	contig24565:1:222:1|similar to Superoxide dismutase [Mn], mitochondrial (P09671)|Evalue: 3e-21	47	8640	2 (1)	13.7	73	6.78	NKRLTIACCQNQDPLEPTTGMIPILGIDVWEHAFYLQYKNAKADYIREIFKVINWNDCTERYAKGIGEPAKKE	0.4	0.8
	AS17, 16-18	EZ761906	contig21632:1:563:1|similar to Superoxide dismutase [Mn], mitochondrial (P09671)|Evalue: 3e-44	567	20772	16 (9)	50.8	187	5.97	AEQWFIGKIAIFIADFISFSSGFPHKNDETTEQSATQRALXXQMQSVASASKGSAGFTARYTLPDLPYSYDALEPVISAEIMKLHHQKHHATYVQNLNTAEEKMSVALQEGDLETAIELQSKIKFNGGGHINHTIFWKNLSPEAGKEPSGDLMQGIRRDFGDFDIFKKVMSKRAAEIQGSGWAWLAL	3.48	4.95
	EES16, 15	EZ761906	contig21632:1:563:1|similar to Superoxide dismutase [Mn], mitochondrial (P09671)|Evalue: 3e-44	485	20772	13 (8)	50.8	187	5.97	AEQWFIGKIAIFIADFISFSSGFPHKNDETTEQSATQRALXXQMQSVASASKGSAGFTARYTLPDLPYSYDALEPVISAEIMKLHHQKHHATYVQNLNTAEEKMSVALQEGDLETAIELQSKIKFNGGGHINHTIFWKNLSPEAGKEPSGDLMQGIRRDFGDFDIFKKVMSKRAAEIQGSGWAWLAL	2.86	3.68
	TS17, 16-18	EZ761906	contig21632:1:563:1|similar to Superoxide dismutase [Mn], mitochondrial (P09671)|Evalue: 3e-44	439	20772	16 (9)	48.1	187	5.97	AEQWFIGKIAIFIADFISFSSGFPHKNDETTEQSATQRALXXQMQSVASASKGSAGFTARYTLPDLPYSYDALEPVISAEIMKLHHQKHHATYVQNLNTAEEKMSVALQEGDLETAIELQSKIKFNGGGHINHTIFWKNLSPEAGKEPSGDLMQGIRRDFGDFDIFKKVMSKRAAEIQGSGWAWLAL	5.05	7.48
GST superfamily	AS18	EZ759826	contig05084:1:468:1|similar to Glutathione S-transferase (O18598)|Evalue: 2e-11	121	18329	4 (3)	17.4	155	7.92	VLEVDGKKIAQSGVILRYLGNRFNLSGTNEDEKIKIEEMVDYMKDFFDAMKRWFIESNEEEKKKKQEKFFTEEVQMYMSGCEKRMEGDFLVASGPTIADFTIASFMDTIDLLYPEAFQKHPKIKEHLNRVKNLKGIKDHIATRRPTKEQILFKYK	0.97	0.97
GST superfamily. Mu family.	AS16	EZ759777	contig04771:2479:3345:1|similar to Glutathione S-transferase (P46419)|Evalue: 1e-31	328	34203	7 (6)	25.3	288	5.89	MSKPKFGYWNIRARGEPIRWILAYCGVDYEEKEYSEDNPSEWFLKDKPAMAFEFASLPYWIEGDLKLTGVNAILRHIARRHNLEGNDEREIATLDMLSIFYGVIREKHISLCYRSSDVGYDQKESEYEKDFLMHKLPELSSYLGEKQFVIGDRITYVDFILYEVLYTHKLFIPKWEMREQYTNLADYMKRIESIPSIAKYNEEKSKTRSVYASTAKWQGPPADYITLPESDIPTRKTSEFQSPQTDSPRLDRRDNDPSKAFTVPPEFCHFPLFCRSKVTINTDHMQIR	0.74	0.74
	EES15, 14	EZ759777	contig04771:2479:3345:1|similar to Glutathione S-transferase (P46419)|Evalue: 1e-31	175	34203	5 (4)	15.3	288	5.89	MSKPKFGYWNIRARGEPIRWILAYCGVDYEEKEYSEDNPSEWFLKDKPAMAFEFASLPYWIEGDLKLTGVNAILRHIARRHNLEGNDEREIATLDMLSIFYGVIREKHISLCYRSSDVGYDQKESEYEKDFLMHKLPELSSYLGEKQFVIGDRITYVDFILYEVLYTHKLFIPKWEMREQYTNLADYMKRIESIPSIAKYNEEKSKTRSVYASTAKWQGPPADYITLPESDIPTRKTSEFQSPQTDSPRLDRRDNDPSKAFTVPPEFCHFPLFCRSKVTINTDHMQIR	0.45	0.55
	TS16	EZ759777	contig04771:2479:3345:1|similar to Glutathione S-transferase (P46419)|Evalue: 1e-31	315	34203	9 (8)	34.7	288	5.89	MSKPKFGYWNIRARGEPIRWILAYCGVDYEEKEYSEDNPSEWFLKDKPAMAFEFASLPYWIEGDLKLTGVNAILRHIARRHNLEGNDEREIATLDMLSIFYGVIREKHISLCYRSSDVGYDQKESEYEKDFLMHKLPELSSYLGEKQFVIGDRITYVDFILYEVLYTHKLFIPKWEMREQYTNLADYMKRIESIPSIAKYNEEKSKTRSVYASTAKWQGPPADYITLPESDIPTRKTSEFQSPQTDSPRLDRRDNDPSKAFTVPPEFCHFPLFCRSKVTINTDHMQIR	1.1	1.1
	TS18, 17	EZ762751	contig25262:1:948:1|similar to Glutathione S-transferase (P46428)|Evalue: 1e-19	66	36210	2 (1)	5.1	315	6.92	AVNMLEKLHRKQAQSLSKSDYTDCTIILIRVISAIRPPDLPLIASYVXSLQDTTGVLSSESPINSIHLVTSHCCIDAVEKQYSSRLDKDPQSPVTTDXKQFTHIMPTYKLHYFDYVRGWAEAIRYTLHYVGQPFEDIVYSRAEWNSNASIKAQMPYGTMPVLEVDGKKIGQSAVILRYFGNRFNLNGKTEDEKIKIEEITDYTKDIIEGIRKWFSETNVEAKKKKQDTYFNDEMQVYLSNIEKQMEGDFLVASGPSVGDFVIAAFTDLIYLLHPAAFQKHPKLTEHLGRVKQLKGIKEHIATRRATQEHIVLKYE	0.09	0.18
	AS18, 17	EZ762684	contig24978:1:466:2|similar to Glutathione S-transferase (O18598)|Evalue: 4e-13	147	18038	4	18.2	154	7.11	EVDGKKIAQSAVIMRYLGNRFNLNGKNEDERLKIEELIDYTKDMIEGLRRWLMESNAEEKQKKRDKXXFNEEVQMYMSGCERQMEGDFMVASGPSIADFAIASILDTIYLVHPEAFQKNPRIKEHLDRVKNLKGIKEHIATRPATQEQTLFKYK	0.98	1.17
	TS18	EZ762684	contig24978:1:466:2|similar to Glutathione S-transferase (O18598)|Evalue: 4e-13	147	18038	5 (4)	24	154	7.11	EVDGKKIAQSAVIMRYLGNRFNLNGKNEDERLKIEELIDYTKDMIEGLRRWLMESNAEEKQKKRDKXXFNEEVQMYMSGCERQMEGDFMVASGPSIADFAIASILDTIYLVHPEAFQKNPRIKEHLDRVKNLKGIKEHIATRPATQEQTLFKYK	1.35	1.35
	AS19, 18	EZ761327	contig18624:208:876:1|similar to Glutathione S-transferase 1 (P46436)|Evalue: 2e-34	299	25396	8 (6)	36	222	7.85	MSKFKLTYFDIRGRGEIGRLLFAAANQKYDDNRIKLETWPQLKTSTPWGQLPVLEVDGKLLAQSTTIWRYLGSQFGFMGQNEWEEALIDSFLMSVVDARNELSRIQFVKGDTEQGAEAKKYKETFIPNELAKFERFIKEHGDTFVVGKQLSVADIALFNFLDFSILHETLKKQDLQQYPKIKDVFERVGQHAPIAAYLQNRPSEAAYAGPVSALKKWFSSTS	1.1	1.95
	TS19, 18	EZ761327	contig18624:208:876:1|similar to Glutathione S-transferase 1 (P46436)|Evalue: 2e-34	239	25396	8 (5)	31.5	222	7.85	MSKFKLTYFDIRGRGEIGRLLFAAANQKYDDNRIKLETWPQLKTSTPWGQLPVLEVDGKLLAQSTTIWRYLGSQFGFMGQNEWEEALIDSFLMSVVDARNELSRIQFVKGDTEQGAEAKKYKETFIPNELAKFERFIKEHGDTFVVGKQLSVADIALFNFLDFSILHETLKKQDLQQYPKIKDVFERVGQHAPIAAYLQNRPSEAAYAGPVSALKKWFSSTS	0.85	1.3
	AS19	EZ761305	contig18536:108:511:3|similar to Glutathione S-transferase 1 (P46436)|Evalue: 2e-25	164	15749	3 (2)	18.7	134	5.08	MSSYKLTYFDSHGIAEPIRFTFAYAGQQFEDNRITRDQWAQMKEQTPFGQVPVLEVDGRPIGQSAAILRFLGNRFDLAGKDEFERARVDGFIDFFKDIENSMAIWYREEDPELKAIIRKKWFDVDIHPFLKVLD	0.79	0.79
	TS19	EZ761305	contig18536:108:511:3|similar to Glutathione S-transferase 1 (P46436)|Evalue: 2e-25	284	15749	6 (5)	55.2	134	5.08	MSSYKLTYFDSHGIAEPIRFTFAYAGQQFEDNRITRDQWAQMKEQTPFGQVPVLEVDGRPIGQSAAILRFLGNRFDLAGKDEFERARVDGFIDFFKDIENSMAIWYREEDPELKAIIRKKWFDVDIHPFLKVLD	1.65	1.65
	AS19	EZ760639	contig11340:1490:2110:2|similar to Glutathione S-transferase 1 (P46436)|Evalue: 1e-30	137	23457	2	13.6	206	5.27	MAKYKLVYFEGRGRAELIRLVFAAAGQPFEDSKFKYSQWPELKKNLPFGQVPVLEVDGKILTQSTAIIRYLARQFGLSGQNQWEEALVDSFLMAGIDLLEAIFKVRYADPENKEAEFMKLLESVVPNAVFNFERFIEEHGSGYTVGSRLTVADLVLFDILDAGIYNNAITEDDIEKTPKIKEVYHKVREQPKVAEYLKSRLPEPSA	0.31	0.31
	TS19	EZ760639	contig11340:1490:2110:2|similar to Glutathione S-transferase 1 (P46436)|Evalue: 1e-30	173	23457	4 (3)	21.4	206	5.27	MAKYKLVYFEGRGRAELIRLVFAAAGQPFEDSKFKYSQWPELKKNLPFGQVPVLEVDGKILTQSTAIIRYLARQFGLSGQNQWEEALVDSFLMAGIDLLEAIFKVRYADPENKEAEFMKLLESVVPNAVFNFERFIEEHGSGYTVGSRLTVADLVLFDILDAGIYNNAITEDDIEKTPKIKEVYHKVREQPKVAEYLKSRLPEPSA	0.49	0.49
	AS19, 18-22	EZ760616	contig11153:105:404:3|similar to Glutathione S-transferase 1 (P46436)|Evalue: 2e-22	443	11707	17 (9)	76	100	5.15	MPSYKLIYFDARGFAEPTRFAFAYAGQSFEDVRMSREEWPTKKDQTPYGQLPILEVDGMKICQSSVILRFVGNRFNLNGRDEAEKLKGEEIMDYMKDMLV	12.28	16.9
	EES17	EZ760616	contig11153:105:404:3|similar to Glutathione S-transferase 1 (P46436)|Evalue: 2e-22	72	11707	2	26	100	5.15	MPSYKLIYFDARGFAEPTRFAFAYAGQSFEDVRMSREEWPTKKDQTPYGQLPILEVDGMKICQSSVILRFVGNRFNLNGRDEAEKLKGEEIMDYMKDMLV	0.68	0.68
	TS19, 18-21	EZ760616	contig11153:105:404:3|similar to Glutathione S-transferase 1 (P46436)|Evalue: 2e-22	423	11707	16 (7)	69	100	5.15	MPSYKLIYFDARGFAEPTRFAFAYAGQSFEDVRMSREEWPTKKDQTPYGQLPILEVDGMKICQSSVILRFVGNRFNLNGRDEAEKLKGEEIMDYMKDMLV	5.11	9.43
	AS19, 17-22	EZ761920	contig21746:1:589:2|similar to Glutathione S-transferase 1 (P46436)|Evalue: 6e-32	716	22033	42 (11)	60	195	5.33	ARAELIRLIFHGTGEDFEDVRLDTGSWPQMKPNTPFGSLPILEFDGNQLAQSLAIARFLAREFGIAGKSRTEEALADSVVDATNDILGDLIRIIFDENDKSKGENRRKFTEATFPASLRSFEQFFEKYGRNGYVVGNSLTWADIAIFNAVDQVVQAGIVGWDYFDKYANVKGLLRKIEETPRFQGYLKTRPHTPY	11.89	19.22
	EES17, 18	EZ761920	contig21746:1:589:2|similar to Glutathione S-transferase 1 (P46436)|Evalue: 6e-32	579	22033	24 (10)	63.1	195	5.33	ARAELIRLIFHGTGEDFEDVRLDTGSWPQMKPNTPFGSLPILEFDGNQLAQSLAIARFLAREFGIAGKSRTEEALADSVVDATNDILGDLIRIIFDENDKSKGENRRKFTEATFPASLRSFEQFFEKYGRNGYVVGNSLTWADIAIFNAVDQVVQAGIVGWDYFDKYANVKGLLRKIEETPRFQGYLKTRPHTPY	6.3	6.63
	TS19, 18-21	EZ761920	contig21746:1:589:2|similar to Glutathione S-transferase 1 (P46436)|Evalue: 6e-32	737	22033	43 (12)	63.6	195	5.33	ARAELIRLIFHGTGEDFEDVRLDTGSWPQMKPNTPFGSLPILEFDGNQLAQSLAIARFLAREFGIAGKSRTEEALADSVVDATNDILGDLIRIIFDENDKSKGENRRKFTEATFPASLRSFEQFFEKYGRNGYVVGNSLTWADIAIFNAVDQVVQAGIVGWDYFDKYANVKGLLRKIEETPRFQGYLKTRPHTPY	16.12	21.28
	AS19	EZ761854	contig21268:161:805:2|similar to Glutathione S-transferase 1 (P46434)|Evalue: 1e-23	212	24421	3	18.2	214	7.81	MQKYKLIYFDERSRAEVIRFIFAAADKKYEDVRIPISEWAAMKNGTPWLGLPILEMEGMCSSNKKVLGQTVAIATYLGREFGLMGSSKWEDALIESFMLAHADLVQAVIVIPWMDXFLXETATQKLQQLTAPQTLSNFERFIEEHGNGHVVGNRLSIADVALFSVVDLLIDNRAITEKDLQKYSRINKIVDDVRQKKSIARYLQTRSPVVRGMQ	0.47	0.47
	TS19	EZ761854	contig21268:161:805:2|similar to Glutathione S-transferase 1 (P46434)|Evalue: 1e-23	154	24421	3	16.8	214	7.81	MQKYKLIYFDERSRAEVIRFIFAAADKKYEDVRIPISEWAAMKNGTPWLGLPILEMEGMCSSNKKVLGQTVAIATYLGREFGLMGSSKWEDALIESFMLAHADLVQAVIVIPWMDXFLXETATQKLQQLTAPQTLSNFERFIEEHGNGHVVGNRLSIADVALFSVVDLLIDNRAITEKDLQKYSRINKIVDDVRQKKSIARYLQTRSPVVRGMQ	0.47	0.47
	AS19, 18-20	EZ761543	contig19542:93:722:3|similar to Glutathione S-transferase 1 (P46436)|Evalue: 1e-31	305	23872	10 (5)	27.3	209	8.59	MLKMTKYKLTYFDARGRAEIIRLLFAAADQKYEDFRMPREQWPQIKQTMPWGQVPALEVDGKVLAQTTSILRYLAKQFGLAGQDKWEEALIDSFVMAVIDLVQAMVKVRFAEESQKEAEMKKMVETIAPTAMANFEKFISEHGSGYVVGSHLSVADLALFDILDAGVTHQAFTENDIQKTPKIKEIYEKVKQHPRVATYIKNRVAEPKK	1.2	2.03
	EES17	EZ761543	contig19542:93:722:3|similar to Glutathione S-transferase 1 (P46436)|Evalue: 1e-31	155	23872	4	20.1	209	8.59	MLKMTKYKLTYFDARGRAEIIRLLFAAADQKYEDFRMPREQWPQIKQTMPWGQVPALEVDGKVLAQTTSILRYLAKQFGLAGQDKWEEALIDSFVMAVIDLVQAMVKVRFAEESQKEAEMKKMVETIAPTAMANFEKFISEHGSGYVVGSHLSVADLALFDILDAGVTHQAFTENDIQKTPKIKEIYEKVKQHPRVATYIKNRVAEPKK	0.69	0.69
	TS19, 17-19	EZ761543	contig19542:93:722:3|similar to Glutathione S-transferase 1 (P46436)|Evalue: 1e-31	291	23872	9 (4)	23.9	209	8.59	MLKMTKYKLTYFDARGRAEIIRLLFAAADQKYEDFRMPREQWPQIKQTMPWGQVPALEVDGKVLAQTTSILRYLAKQFGLAGQDKWEEALIDSFVMAVIDLVQAMVKVRFAEESQKEAEMKKMVETIAPTAMANFEKFISEHGSGYVVGSHLSVADLALFDILDAGVTHQAFTENDIQKTPKIKEIYEKVKQHPRVATYIKNRVAEPKK	0.69	1.52
	AS18	EZ761473	contig19224:1:520:3|similar to Glutathione S-transferase 2 (P20136)|Evalue: 4e-30	184	20646	5 (4)	32	172	5.87	ANQIRYLLEYVGQPYTYKSYNPSNPSSWFNEKFELGLPLPNLPYWIDGNTKLTQSVAIMRHIARKHNLGGQSEEEQEECEMLDGLFLDIRWSWRTLMYKETQDFEKDTKQYEGELKKYCDILVKYLGNKKYILGDHLTYVDFTFFDMLDNHKHLLPSIIAQYPSLTQYHQRI	0.83	0.83
	TS18	EZ761473	contig19224:1:520:3|similar to Glutathione S-transferase 2 (P20136)|Evalue: 4e-30	122	20646	3	20.9	172	5.87	ANQIRYLLEYVGQPYTYKSYNPSNPSSWFNEKFELGLPLPNLPYWIDGNTKLTQSVAIMRHIARKHNLGGQSEEEQEECEMLDGLFLDIRWSWRTLMYKETQDFEKDTKQYEGELKKYCDILVKYLGNKKYILGDHLTYVDFTFFDMLDNHKHLLPSIIAQYPSLTQYHQRI	0.57	0.57
	AS4, 6, 7	EZ761627	contig19966:1:524:3|similar to Microsomal glutathione S-transferase 2 (Q2KJG4)|Evalue: 2e-17	33	19340	1	5.2	173	9.77	RTPETAEMVKLGQLMTLPPRALNPETLYLVGLVTVLSMFHMASFGIRVGLARRKYRVPPPKTDGNDNFVRVFRAHQNSVENYTQFLAVMWSCAIFFHQVPAAILGVLYLIAREAYFVGYSAKTESRSFGFGMALMTLLGLGTLAMVGAAGIAMRMYSGQDWVWEGIRGIWLPL	0.17	0.51
	EES19, 1-4, 18-20	EZ761627	contig19966:1:524:3|similar to Microsomal glutathione S-transferase 2 (Q2KJG4)|Evalue: 2e-17	162	19340	7 (3)	18.5	173	9.77	RTPETAEMVKLGQLMTLPPRALNPETLYLVGLVTVLSMFHMASFGIRVGLARRKYRVPPPKTDGNDNFVRVFRAHQNSVENYTQFLAVMWSCAIFFHQVPAAILGVLYLIAREAYFVGYSAKTESRSFGFGMALMTLLGLGTLAMVGAAGIAMRMYSGQDWVWEGIRGIWLPL	0.9	3.03
	TS4, 5	EZ761627	contig19966:1:524:3|similar to Microsomal glutathione S-transferase 2 (Q2KJG4)|Evalue: 2e-17	142	19340	3	18.5	173	9.77	RTPETAEMVKLGQLMTLPPRALNPETLYLVGLVTVLSMFHMASFGIRVGLARRKYRVPPPKTDGNDNFVRVFRAHQNSVENYTQFLAVMWSCAIFFHQVPAAILGVLYLIAREAYFVGYSAKTESRSFGFGMALMTLLGLGTLAMVGAAGIAMRMYSGQDWVWEGIRGIWLPL	0.62	1
	AS18, 19	EZ763254	contig27884:1:341:1|similar to Glutathione S-transferase Mu 2 (Q9TSM4)|Evalue: 1e-10	224	12869	10 (4)	31	113	8.08	AYVIKGDTCSVSYRSQLXAHFASSLRLPVFSKSTLSVPSTQPYLISVEMPATLGYWNLRGLANQIRYLLEYVGEKYDYKSWDQYENPPSWFSEKHSLGLPFPNLHIGSMGTPN	1.57	2.6
	EES17, 16	EZ763254	contig27884:1:341:1|similar to Glutathione S-transferase Mu 2 (Q9TSM4)|Evalue: 1e-10	180	12869	8 (3)	27.4	113	8.08	AYVIKGDTCSVSYRSQLXAHFASSLRLPVFSKSTLSVPSTQPYLISVEMPATLGYWNLRGLANQIRYLLEYVGEKYDYKSWDQYENPPSWFSEKHSLGLPFPNLHIGSMGTPN	1.03	2.06
	TS18	EZ763254	contig27884:1:341:1|similar to Glutathione S-transferase Mu 2 (Q9TSM4)|Evalue: 1e-10	179	12869	8 (3)	27.4	113	8.08	AYVIKGDTCSVSYRSQLXAHFASSLRLPVFSKSTLSVPSTQPYLISVEMPATLGYWNLRGLANQIRYLLEYVGEKYDYKSWDQYENPPSWFSEKHSLGLPFPNLHIGSMGTPN	1.03	1.03
	AS18, 16	EZ763270	contig27967:1:110:3|similar to Glutathione S-transferase Mu 2 (Q9TSM4)|Evalue: 1e-04	129	4391	5 (3)	55.6	36	4.94	PTLGYWNLRGLSNQIRYLLEYVGEKYDYKSYDQFEA	5.18	6.02
	EES16	EZ763270	contig27967:1:110:3|similar to Glutathione S-transferase Mu 2 (Q9TSM4)|Evalue: 1e-04	68	4391	2	44.4	36	4.94	PTLGYWNLRGLSNQIRYLLEYVGEKYDYKSYDQFEA	2.37	2.37
	TS18	EZ763270	contig27967:1:110:3|similar to Glutathione S-transferase Mu 2 (Q9TSM4)|Evalue: 1e-04	89	4391	5 (2)	44.4	36	4.94	PTLGYWNLRGLSNQIRYLLEYVGEKYDYKSYDQFEA	2.37	2.37
	AS18, 17-19	EZ763325	contig28284:1:272:3|similar to Glutathione S-transferase (P30116)|Evalue: 2e-10	361	10701	15 (8)	76.4	89	4.97	QQCDMIEGALGDFRMGWGILMYMSQDFDKEKKQYEETVKKHYDMFSQFLGNKKYLLGNDIKYVDFILFDLLDNHQHFIPDVSKQVPESC	15.6	16.67
	EES16, 17	EZ763325	contig28284:1:272:3|similar to Glutathione S-transferase (P30116)|Evalue: 2e-10	146	10701	4 (3)	47.2	89	4.97	QQCDMIEGALGDFRMGWGILMYMSQDFDKEKKQYEETVKKHYDMFSQFLGNKKYLLGNDIKYVDFILFDLLDNHQHFIPDVSKQVPESC	2.08	2.83
	TS18, 17	EZ763325	contig28284:1:272:3|similar to Glutathione S-transferase (P30116)|Evalue: 2e-10	256	10701	11 (5)	73	89	4.97	QQCDMIEGALGDFRMGWGILMYMSQDFDKEKKQYEETVKKHYDMFSQFLGNKKYLLGNDIKYVDFILFDLLDNHQHFIPDVSKQVPESC	8.47	9.79
	AS18, 17-19	EZ763308	contig28200:1:335:1|similar to Glutathione S-transferase Mu 1 (Q9N0V4)|Evalue: 4e-19	256	13006	11 (6)	32.4	111	5.82	NAILHHLARKHNLGAKSEEEXAAMDMIEGALHDFRMGWVKLMYGSQDFEKDKSQYQMEVKKHLEMFSKYLADKQYLLGSDIKYLDFTLFDILDNHNCFLPGILNSYKNLAD	4.14	5.42
	EES17, 16	EZ763308	contig28200:1:335:1|similar to Glutathione S-transferase Mu 1 (Q9N0V4)|Evalue: 4e-19	227	13006	9 (6)	32.4	111	5.82	NAILHHLARKHNLGAKSEEEXAAMDMIEGALHDFRMGWVKLMYGSQDFEKDKSQYQMEVKKHLEMFSKYLADKQYLLGSDIKYLDFTLFDILDNHNCFLPGILNSYKNLAD	3.07	3.67
	TS18	EZ763308	contig28200:1:335:1|similar to Glutathione S-transferase Mu 1 (Q9N0V4)|Evalue: 4e-19	172	13006	9 (4)	25.2	111	5.82	NAILHHLARKHNLGAKSEEEXAAMDMIEGALHDFRMGWVKLMYGSQDFEKDKSQYQMEVKKHLEMFSKYLADKQYLLGSDIKYLDFTLFDILDNHNCFLPGILNSYKNLAD	2.22	2.22
	AS18, 17-19	EZ762051	contig22559:1:111:1|similar to Glutathione S-transferase Mu 2 (Q9TSM4)|Evalue: 1e-05	194	4476	12 (4)	81.1	37	4.94	PATLGYWNLRGLANQIRYLLEYVGEKYDYKSYDQFET	10.34	20.7
	EES17, 16	EZ762051	contig22559:1:111:1|similar to Glutathione S-transferase Mu 2 (Q9TSM4)|Evalue: 1e-05	149	4476	7 (3)	70.3	37	4.94	PATLGYWNLRGLANQIRYLLEYVGEKYDYKSYDQFET	5.18	10.36
	TS18, 17-19	EZ762051	contig22559:1:111:1|similar to Glutathione S-transferase Mu 2 (Q9TSM4)|Evalue: 1e-05	152	4476	10 (3)	70.3	37	4.94	PATLGYWNLRGLANQIRYLLEYVGEKYDYKSYDQFET	5.18	12.73
	AS18, 16-20	EZ763317	contig28262:1:137:2|similar to Glutathione S-transferase Mu 2 (P08010)|Evalue: 2e-04	120	5430	9 (2)	71.1	45	6.92	GNKKYILGNDVKYVDFMLFDVLDNHQQFIPEVSKQYQNLADYHKR	11.92	15.71
	EES16, 17	EZ763317	contig28262:1:137:2|similar to Glutathione S-transferase Mu 2 (P08010)|Evalue: 2e-04	98	5430	2	71.1	45	6.92	GNKKYILGNDVKYVDFMLFDVLDNHQQFIPEVSKQYQNLADYHKR	1.78	2.45
	TS18, 17-19	EZ763317	contig28262:1:137:2|similar to Glutathione S-transferase Mu 2 (P08010)|Evalue: 2e-04	143	5430	9 (3)	91.1	45	6.92	GNKKYILGNDVKYVDFMLFDVLDNHQQFIPEVSKQYQNLADYHKR	20.55	23
	AS17, 18	EZ760645	contig11431:61:646:1|similar to Glutathione S-transferase omega-1 (P78417)|Evalue: 4e-24	393	22216	11 (7)	60	195	5.28	MVVSDDVETLSAGSPAPVLSTDKLVMYNARMSPFCQKIRMFLNVKGIPFQVINVDLKNKPDWFRGISPLNLVPIIVEPNGNVLYESVVMAEYLDDKYEGKRRILPSDLYERAKEKMLIQVLLSKIDQPTRSMAIAPKPDSLENLLKAYDFVESQLTRPYLAGNQMGMSDLMMFAHFDRAAAIFSINGFDFEEQRQ	2.55	2.7
	EES16	EZ760645	contig11431:61:646:1|similar to Glutathione S-transferase omega-1 (P78417)|Evalue: 4e-24	165	22216	2	17.4	195	5.28	MVVSDDVETLSAGSPAPVLSTDKLVMYNARMSPFCQKIRMFLNVKGIPFQVINVDLKNKPDWFRGISPLNLVPIIVEPNGNVLYESVVMAEYLDDKYEGKRRILPSDLYERAKEKMLIQVLLSKIDQPTRSMAIAPKPDSLENLLKAYDFVESQLTRPYLAGNQMGMSDLMMFAHFDRAAAIFSINGFDFEEQRQ	0.32	0.32
	TS17	EZ760645	contig11431:61:646:1|similar to Glutathione S-transferase omega-1 (P78417)|Evalue: 4e-24	305	22216	5	35.4	195	5.28	MVVSDDVETLSAGSPAPVLSTDKLVMYNARMSPFCQKIRMFLNVKGIPFQVINVDLKNKPDWFRGISPLNLVPIIVEPNGNVLYESVVMAEYLDDKYEGKRRILPSDLYERAKEKMLIQVLLSKIDQPTRSMAIAPKPDSLENLLKAYDFVESQLTRPYLAGNQMGMSDLMMFAHFDRAAAIFSINGFDFEEQRQ	1.02	1.02
	AS17, 18	EZ759582	contig03609:1:822:1|similar to Glutathione S-transferase theta-1 (P20135)|Evalue: 2e-28	315	31481	7	29.7	273	9.33	STVKLNPEKSATVRLKTSEVPFQVIPQIVSRLARNGEQNLLRPYVATVASPVHLVRATGIPNVTEVPIALRRQENQTEDFKKTSPFGKVPAFQENADFTLTESNAIIRYLIESHPTKAADHWYPKDIRKRAKVNEYLDWYPANTRAAFGHYFQIAFIQPITRQKRQDGKKMAELENQMKEVLTKIESYFLQDRPFIVGKELSLADLQAAVEIEQMFSTGKDPLKAHPSLQQWRERVKQQLEPHWTEAHKIIYTVTPRMHEMLRAQNLLATDDN	1.02	1.13
	EES16, 15	EZ759582	contig03609:1:822:1|similar to Glutathione S-transferase theta-1 (P20135)|Evalue: 2e-28	190	31481	5 (4)	19.8	273	9.33	STVKLNPEKSATVRLKTSEVPFQVIPQIVSRLARNGEQNLLRPYVATVASPVHLVRATGIPNVTEVPIALRRQENQTEDFKKTSPFGKVPAFQENADFTLTESNAIIRYLIESHPTKAADHWYPKDIRKRAKVNEYLDWYPANTRAAFGHYFQIAFIQPITRQKRQDGKKMAELENQMKEVLTKIESYFLQDRPFIVGKELSLADLQAAVEIEQMFSTGKDPLKAHPSLQQWRERVKQQLEPHWTEAHKIIYTVTPRMHEMLRAQNLLATDDN	0.49	0.6
	TS17	EZ759582	contig03609:1:822:1|similar to Glutathione S-transferase theta-1 (P20135)|Evalue: 2e-28	270	31481	8 (5)	22	273	9.33	STVKLNPEKSATVRLKTSEVPFQVIPQIVSRLARNGEQNLLRPYVATVASPVHLVRATGIPNVTEVPIALRRQENQTEDFKKTSPFGKVPAFQENADFTLTESNAIIRYLIESHPTKAADHWYPKDIRKRAKVNEYLDWYPANTRAAFGHYFQIAFIQPITRQKRQDGKKMAELENQMKEVLTKIESYFLQDRPFIVGKELSLADLQAAVEIEQMFSTGKDPLKAHPSLQQWRERVKQQLEPHWTEAHKIIYTVTPRMHEMLRAQNLLATDDN	0.82	0.82
	AS17	EZ763223	contig27735:1:141:1|similar to Probable glutathione transferase omega-2 (P34277)|Evalue: 2e-04	73	5278	2	39.1	46	9.1	SKKLQAWVYRLLEVPEIKETMQPSATMKAFFDSYKAGSPNYDIGLK	1.83	1.83
	TS17	EZ763223	contig27735:1:141:1|similar to Probable glutathione transferase omega-2 (P34277)|Evalue: 2e-04	134	5278	5 (4)	78.3	46	9.1	SKKLQAWVYRLLEVPEIKETMQPSATMKAFFDSYKAGSPNYDIGLK	7.03	7.03
	AS18	EZ763112	contig27010:1:263:3|similar to Glutathione S-transferase class-mu 26 kDa isozyme 7 (P31671)|Evalue: 2e-08	197	10082	4 (3)	26.7	86	6.93	QYLAEKQFLLGSDVRYVDFMLFDLLDIHNGMFPDLLSQYPNLQQYHSRVFNLKGVKEFIQSDRNPKRNDGPRSKYEAAAYQLDAAK	1.42	1.42
	TS18	EZ763112	contig27010:1:263:3|similar to Glutathione S-transferase class-mu 26 kDa isozyme 7 (P31671)|Evalue: 2e-08	163	10082	4 (3)	26.7	86	6.93	QYLAEKQFLLGSDVRYVDFMLFDLLDIHNGMFPDLLSQYPNLQQYHSRVFNLKGVKEFIQSDRNPKRNDGPRSKYEAAAYQLDAAK	1.42	1.42
	AS17, 16-18	EZ762947	contig26098:1:627:1|similar to Glutathione S-transferase omega-1 (P78417)|Evalue: 6e-39	702	24260	23 (13)	68.9	209	8.58	PKTDNQHLTLYSMRFCPYADRARLTLNVKGIPHDIVNIDLAKKPEWYLKKNPAGKVPTLEEPNNRLIYESLIVAEYLDDTHKGKRKLLPTDPYERAQQKMLIEVLAGKITSAFYGLVLKKENRDEGVQNLHKAIDEVEKMLTNDFFAGKELGFVDLMIFPWISRFTAMKEVFALDWNETRYPKLTSWAKRLMAIPEIKESMQSDETVKG	7.94	9.78
	EES16, 15	EZ762947	contig26098:1:627:1|similar to Glutathione S-transferase omega-1 (P78417)|Evalue: 6e-39	619	24260	18 (11)	61.2	209	8.58	PKTDNQHLTLYSMRFCPYADRARLTLNVKGIPHDIVNIDLAKKPEWYLKKNPAGKVPTLEEPNNRLIYESLIVAEYLDDTHKGKRKLLPTDPYERAQQKMLIEVLAGKITSAFYGLVLKKENRDEGVQNLHKAIDEVEKMLTNDFFAGKELGFVDLMIFPWISRFTAMKEVFALDWNETRYPKLTSWAKRLMAIPEIKESMQSDETVKG	4.34	6.53
	TS17, 16-18	EZ762947	contig26098:1:627:1|similar to Glutathione S-transferase omega-1 (P78417)|Evalue: 6e-39	756	24260	34 (15)	75.6	209	8.58	PKTDNQHLTLYSMRFCPYADRARLTLNVKGIPHDIVNIDLAKKPEWYLKKNPAGKVPTLEEPNNRLIYESLIVAEYLDDTHKGKRKLLPTDPYERAQQKMLIEVLAGKITSAFYGLVLKKENRDEGVQNLHKAIDEVEKMLTNDFFAGKELGFVDLMIFPWISRFTAMKEVFALDWNETRYPKLTSWAKRLMAIPEIKESMQSDETVKG	10.57	11.18
	AS17	EZ762891	contig25826:1:785:3|similar to Glutathione S-transferase omega-1 (Q9N1F5)|Evalue: 2e-29	317	30048	8 (6)	31.8	261	7.56	SRIHIXLNTVCRPDIACDSASAAVEIDHLRICQLCSVTVEGFTLSVARHASCRFLDFLFHRNSVRKLLKMVYGDIKHCTAGSAEPQISKDKPTLYSMRFCPFADRVRLTLNVKGMPYDIVNINTSSKPEWYPNVNPLGKVPTLKHPNGHELYESLIVCEYLDDIEEGKKKLLPKDAYERARQKMLLEVISSKLTPPFFAIMGKKNNEDGPKLIAALEEIEKMLTDDYFAGKDWGYVDLMLLPFIKRIPIIGDSFGVEYGDR	0.88	0.88
	TS17	EZ762891	contig25826:1:785:3|similar to Glutathione S-transferase omega-1 (Q9N1F5)|Evalue: 2e-29	165	30048	5 (4)	22.2	261	7.56	SRIHIXLNTVCRPDIACDSASAAVEIDHLRICQLCSVTVEGFTLSVARHASCRFLDFLFHRNSVRKLLKMVYGDIKHCTAGSAEPQISKDKPTLYSMRFCPFADRVRLTLNVKGMPYDIVNINTSSKPEWYPNVNPLGKVPTLKHPNGHELYESLIVCEYLDDIEEGKKKLLPKDAYERARQKMLLEVISSKLTPPFFAIMGKKNNEDGPKLIAALEEIEKMLTDDYFAGKDWGYVDLMLLPFIKRIPIIGDSFGVEYGDR	0.52	0.52
	AS19, 19-21	EZ762376	contig23837:230:385:2|similar to Probable glutathione S-transferase 7 (P91253)|Evalue: 7e-08	111	6140	4 (2)	40.4	52	8.15	MQIKLTYFDLRGRGELPRLILEAAQQQYEDVRVPFDKWPQLKPTLPFQQIAG	1.53	2.71
	TS19, 20	EZ762376	contig23837:230:385:2|similar to Probable glutathione S-transferase 7 (P91253)|Evalue: 7e-08	119	6140	5 (3)	53.8	52	8.15	MQIKLTYFDLRGRGELPRLILEAAQQQYEDVRVPFDKWPQLKPTLPFQQIAG	3.01	3.6
	AS18, 17	EZ762133	contig22893:435:602:3|similar to Glutathione S-transferase (P46428)|Evalue: 6e-07	60	6670	2 (1)	23.2	56	6.54	MPTYKLHYFDYVRGWAEPIRFIFKYSGQPFEDSVYSRAEWDSNASIKAQMPYGTMP	0.54	1.08
	TS18, 17	EZ762133	contig22893:435:602:3|similar to Glutathione S-transferase (P46428)|Evalue: 6e-07	64	6670	2 (1)	23.2	56	6.54	MPTYKLHYFDYVRGWAEPIRFIFKYSGQPFEDSVYSRAEWDSNASIKAQMPYGTMP	0.54	1.08
GST superfamily. sigma family.	AS18, 19	EZ760496	contig09885:332:509:2|similar to Glutathione-requiring prostaglandin D synthase (O60760)|Evalue: 2e-12	117	6757	4 (2)	39	59	4.81	MPSYKLTYFDLRALAEPIRFTFAYAGQQFEDTAFKESSGQXIKEQMPFGQLPILEVDGK	1.33	2.66
	EES17, 18	EZ760496	contig09885:332:509:2|similar to Glutathione-requiring prostaglandin D synthase (O60760)|Evalue: 2e-12	75	6757	2 (1)	27.1	59	4.81	MPSYKLTYFDLRALAEPIRFTFAYAGQQFEDTAFKESSGQXIKEQMPFGQLPILEVDGK	0.53	1.06
	TS19, 18	EZ760496	contig09885:332:509:2|similar to Glutathione-requiring prostaglandin D synthase (O60760)|Evalue: 2e-12	110	6757	8 (2)	39	59	4.81	MPSYKLTYFDLRALAEPIRFTFAYAGQQFEDTAFKESSGQXIKEQMPFGQLPILEVDGK	2.56	3.09
	AS19, 17-21	EZ759316	contig02240:94:701:1|similar to Glutathione-requiring prostaglandin D synthase (O73888)|Evalue: 2e-13	283	23181	18 (4)	23.3	202	4.6	MADYKLFYYRNRVRTELIRLIFAAAGEQYEDIALDGGGQFPQNFRPPITSGTLPLLQFGDQYLTQSMAIARYLAEEFGLTSQNRFEQALIDSVVDAVSDVLVDANDLLNSDNDDSRDFYQKRINERSLPELLSSLDRFHQQHSDGQSYIFGSNLSYADLAVYNMIDWFTNKGIVDHSTFDSYDYTRNIRHALEGTPRISNFL	0.96	2.51
	EES17	EZ759316	contig02240:94:701:1|similar to Glutathione-requiring prostaglandin D synthase (O73888)|Evalue: 2e-13	209	23181	9 (4)	23.3	202	4.6	MADYKLFYYRNRVRTELIRLIFAAAGEQYEDIALDGGGQFPQNFRPPITSGTLPLLQFGDQYLTQSMAIARYLAEEFGLTSQNRFEQALIDSVVDAVSDVLVDANDLLNSDNDDSRDFYQKRINERSLPELLSSLDRFHQQHSDGQSYIFGSNLSYADLAVYNMIDWFTNKGIVDHSTFDSYDYTRNIRHALEGTPRISNFL	0.96	0.96
	TS20, 18-21	EZ759316	contig02240:94:701:1|similar to Glutathione-requiring prostaglandin D synthase (O73888)|Evalue: 2e-13	137	23181	4 (2)	13.9	202	4.6	MADYKLFYYRNRVRTELIRLIFAAAGEQYEDIALDGGGQFPQNFRPPITSGTLPLLQFGDQYLTQSMAIARYLAEEFGLTSQNRFEQALIDSVVDAVSDVLVDANDLLNSDNDDSRDFYQKRINERSLPELLSSLDRFHQQHSDGQSYIFGSNLSYADLAVYNMIDWFTNKGIVDHSTFDSYDYTRNIRHALEGTPRISNFL	0.31	3.95
	AS19	EZ763048	contig26589:66:218:3|similar to Glutathione-requiring prostaglandin D synthase (Q9JHF7)|Evalue: 6e-11	91	6214	5 (2)	31.4	51	9.69	MTKFKLIYFDTRGRAEVIRLLFAAADQKYEDFRIPREQWPQIKQTMPWGQV	1.49	1.49
	TS18, 19	EZ763048	contig26589:66:218:3|similar to Glutathione-requiring prostaglandin D synthase (Q9JHF7)|Evalue: 6e-11	113	6214	4 (3)	41.2	51	9.69	MTKFKLIYFDTRGRAEVIRLLFAAADQKYEDFRIPREQWPQIKQTMPWGQV	2.93	4.42
	AS19, 7, 18	EZ761258	contig18259:2282:2926:2|similar to Glutathione-requiring prostaglandin D synthase (O60760)|Evalue: 8e-31	321	25248	8 (6)	42.5	214	8.68	MRRERNTMASSNYKLVYWNMRGRGEPIRMMFAYANVPFENVTVKREEWPPMKSSVPLGTVPYLEVDGVTIPTSVAIGRFLAKRFDLLGDGDVNQALIDALVDYHQDLCSLLVPVVREQDLERKKQLKEKVFTEDMPKKLEFLEAFQRKYNKDKDYLIGDRLTYADIFIANLMKLFQDFHPSVLDNFAYLKKHCDLVHNTKNIKEYVEKRPKTEF	1.11	2.63
	EES17, 12	EZ761258	contig18259:2282:2926:2|similar to Glutathione-requiring prostaglandin D synthase (O60760)|Evalue: 8e-31	309	25248	8 (6)	42.5	214	8.68	MRRERNTMASSNYKLVYWNMRGRGEPIRMMFAYANVPFENVTVKREEWPPMKSSVPLGTVPYLEVDGVTIPTSVAIGRFLAKRFDLLGDGDVNQALIDALVDYHQDLCSLLVPVVREQDLERKKQLKEKVFTEDMPKKLEFLEAFQRKYNKDKDYLIGDRLTYADIFIANLMKLFQDFHPSVLDNFAYLKKHCDLVHNTKNIKEYVEKRPKTEF	1.39	1.52
	TS18, 19	EZ761258	contig18259:2282:2926:2|similar to Glutathione-requiring prostaglandin D synthase (O60760)|Evalue: 8e-31	372	25248	12 (6)	42.5	214	8.68	MRRERNTMASSNYKLVYWNMRGRGEPIRMMFAYANVPFENVTVKREEWPPMKSSVPLGTVPYLEVDGVTIPTSVAIGRFLAKRFDLLGDGDVNQALIDALVDYHQDLCSLLVPVVREQDLERKKQLKEKVFTEDMPKKLEFLEAFQRKYNKDKDYLIGDRLTYADIFIANLMKLFQDFHPSVLDNFAYLKKHCDLVHNTKNIKEYVEKRPKTEF	2.07	3.18
GST superfamily. Zeta family.	AS18, 17-19	EZ762909	contig25932:359:1012:2|similar to Maleylacetoacetate isomerase (Q9WVL0)|Evalue: 4e-65	367	25344	8 (6)	40.6	217	6.89	MASTPLLHSYFRSSCSWRVRFVLSYKGIAYETKAVNLLNGEQKSEEYKKINALCQVPALEIDGLLMTQSVSIMEYLEETHPERPLLPTKPRDRQRVRQIVEVICSSIQPLQNLSVLNQYSDDQQKKSEWAAHFIAKGFDSLEMLLREWSGKYCVGDEVSLADACLPAQVYNAKRFKVDMSLYPTIARINEEISKLDAYKMSHPCKQPDCPSELRNQY	1.38	1.51
	TS18	EZ762909	contig25932:359:1012:2|similar to Maleylacetoacetate isomerase (Q9WVL0)|Evalue: 4e-65	318	25344	7 (6)	40.6	217	6.89	MASTPLLHSYFRSSCSWRVRFVLSYKGIAYETKAVNLLNGEQKSEEYKKINALCQVPALEIDGLLMTQSVSIMEYLEETHPERPLLPTKPRDRQRVRQIVEVICSSIQPLQNLSVLNQYSDDQQKKSEWAAHFIAKGFDSLEMLLREWSGKYCVGDEVSLADACLPAQVYNAKRFKVDMSLYPTIARINEEISKLDAYKMSHPCKQPDCPSELRNQY	1.1	1.1
	AS17, 18	EZ759438	contig02881:144:845:3|similar to Maleylacetoacetate isomerase (Q9WVL0)|Evalue: 2e-56	189	26650	4 (3)	28.8	233	7.69	MQVAARHSVQTMASQTAKPVLYAYAKSSCSWRVRAVLHWKRVDFDIVCHDPYGNVSDKQKDEFQKLNPLSQVPALQIDGYHLTQSIAILEYLEKTRPQQRIIPDDPIKAANARIIAEMINSAVQPLQNPSVARKHSDNAEEQKKWQIFWIEKGLTALEAQLHSTHGQFAVGDEVTIADFCLVPQVFAAKRFGADMAKYPLCAQINDHLMKLEAFQKSHPCNQPDTPESERGKY	0.42	0.55
	TS17	EZ759438	contig02881:144:845:3|similar to Maleylacetoacetate isomerase (Q9WVL0)|Evalue: 2e-56	59	26650	2	16.3	233	7.69	MQVAARHSVQTMASQTAKPVLYAYAKSSCSWRVRAVLHWKRVDFDIVCHDPYGNVSDKQKDEFQKLNPLSQVPALQIDGYHLTQSIAILEYLEKTRPQQRIIPDDPIKAANARIIAEMINSAVQPLQNPSVARKHSDNAEEQKKWQIFWIEKGLTALEAQLHSTHGQFAVGDEVTIADFCLVPQVFAAKRFGADMAKYPLCAQINDHLMKLEAFQKSHPCNQPDTPESERGKY	0.27	0.27
MAPEG family	AS4, 6, 7	EZ761627	contig19966:1:524:3|similar to Microsomal glutathione S-transferase 2 (Q2KJG4)|Evalue: 2e-17	33	19340	1	5.2	173	9.77	RTPETAEMVKLGQLMTLPPRALNPETLYLVGLVTVLSMFHMASFGIRVGLARRKYRVPPPKTDGNDNFVRVFRAHQNSVENYTQFLAVMWSCAIFFHQVPAAILGVLYLIAREAYFVGYSAKTESRSFGFGMALMTLLGLGTLAMVGAAGIAMRMYSGQDWVWEGIRGIWLPL	0.17	0.51
	EES19, 1-4, 18-20	EZ761627	contig19966:1:524:3|similar to Microsomal glutathione S-transferase 2 (Q2KJG4)|Evalue: 2e-17	162	19340	7 (3)	18.5	173	9.77	RTPETAEMVKLGQLMTLPPRALNPETLYLVGLVTVLSMFHMASFGIRVGLARRKYRVPPPKTDGNDNFVRVFRAHQNSVENYTQFLAVMWSCAIFFHQVPAAILGVLYLIAREAYFVGYSAKTESRSFGFGMALMTLLGLGTLAMVGAAGIAMRMYSGQDWVWEGIRGIWLPL	0.9	3.03
	TS4, 5	EZ761627	contig19966:1:524:3|similar to Microsomal glutathione S-transferase 2 (Q2KJG4)|Evalue: 2e-17	142	19340	3	18.5	173	9.77	RTPETAEMVKLGQLMTLPPRALNPETLYLVGLVTVLSMFHMASFGIRVGLARRKYRVPPPKTDGNDNFVRVFRAHQNSVENYTQFLAVMWSCAIFFHQVPAAILGVLYLIAREAYFVGYSAKTESRSFGFGMALMTLLGLGTLAMVGAAGIAMRMYSGQDWVWEGIRGIWLPL	0.62	1
thioredoxin family	AS16, 15	EZ759498	contig03216:160:412:1|similar to Thioredoxin-1 (O14463)|Evalue: 2e-20	205	9635	5 (4)	56	84	6.81	MPVKHLKNDSEFQSELTSAVNKLVVVDFFAVWCGPCRTIAPKFEELSHKHPNVVFLKVDVDQLENTARSQGISAMPTFIFYKNS	2.42	3.27
	EES14, 15	EZ759498	contig03216:160:412:1|similar to Thioredoxin-1 (O14463)|Evalue: 2e-20	300	9635	7 (5)	65.5	84	6.81	MPVKHLKNDSEFQSELTSAVNKLVVVDFFAVWCGPCRTIAPKFEELSHKHPNVVFLKVDVDQLENTARSQGISAMPTFIFYKNS	3.65	4.5
	TS16, 15	EZ759498	contig03216:160:412:1|similar to Thioredoxin-1 (O14463)|Evalue: 2e-20	245	9635	7 (4)	56	84	6.81	MPVKHLKNDSEFQSELTSAVNKLVVVDFFAVWCGPCRTIAPKFEELSHKHPNVVFLKVDVDQLENTARSQGISAMPTFIFYKNS	2.42	3.27
	EES21	EZ761336	contig18660:1:149:2|similar to Thioredoxin-1 (O14463)|Evalue: 7e-10	166	5463	3 (2)	75.5	49	4.5	PDFERMATQYGDVMFVKVNVDEAEDVAAECGIHAMPTFQVYKNGAKVGE	1.78	1.78
	EES21, 20-22	EZ761159	contig17806:1:214:2|similar to Thioredoxin-1 (O14463)|Evalue: 4e-12	185	7783	6 (3)	41.4	70	8.26	RLNTPRIERMATQYGDVMFVKVDIDEAADVTGTYGVRTMPTFQVYKNGAKVGEVVGADIKKVEALVKQHM	2.07	3.63
	AS16	EZ763130	contig27083:1:464:3|similar to Thioredoxin-like protein 1 (O43396)|Evalue: 8e-34	160	16868	5 (4)	41.6	154	4.67	KVHQVRGADIAAIENGIKTYGSSGASDEGTKDGLFDLTTSVDKSQSECLNESDDHGFANLFKDSGYLESDSDEQLILNLSFNQPIKLHSLKVKAPTDNGPKTVKLFVNLPRTLDFDQATGMEAVQQLELSPSDFSGESVIPLKFVKFQNVQNLQ	1.08	1.08
	EES14	EZ763130	contig27083:1:464:3|similar to Thioredoxin-like protein 1 (O43396)|Evalue: 8e-34	201	16868	4	37	154	4.67	KVHQVRGADIAAIENGIKTYGSSGASDEGTKDGLFDLTTSVDKSQSECLNESDDHGFANLFKDSGYLESDSDEQLILNLSFNQPIKLHSLKVKAPTDNGPKTVKLFVNLPRTLDFDQATGMEAVQQLELSPSDFSGESVIPLKFVKFQNVQNLQ	1.08	1.08
	TS15, 16	EZ763130	contig27083:1:464:3|similar to Thioredoxin-like protein 1 (O43396)|Evalue: 8e-34	80	16868	3 (2)	13	154	4.67	KVHQVRGADIAAIENGIKTYGSSGASDEGTKDGLFDLTTSVDKSQSECLNESDDHGFANLFKDSGYLESDSDEQLILNLSFNQPIKLHSLKVKAPTDNGPKTVKLFVNLPRTLDFDQATGMEAVQQLELSPSDFSGESVIPLKFVKFQNVQNLQ	0.44	0.88
	AS15, 16	EZ761494	contig19284:1:135:1|similar to Thioredoxin-like protein 1 (O43396)|Evalue: 2e-08	73	4782	1	45.5	44	6.4	IFVKDNQSGQETTRIDSLSILGFPISATNMGDFKRVAGKKGEVE	0.77	2.91
	TS16, 15	EZ761494	contig19284:1:135:1|similar to Thioredoxin-like protein 1 (O43396)|Evalue: 2e-08	61	4782	2 (1)	45.5	44	6.4	IFVKDNQSGQETTRIDSLSILGFPISATNMGDFKRVAGKKGEVE	0.77	1.54
	EES18, 19	EZ763207	contig27623:107:610:2|similar to Thioredoxin domain-containing protein 17 (Q5REA8)|Evalue: 3e-12	83	18916	2	9.6	167	5.24	MAASSAPYIVEVTSHDELMSATKDPRIAAKSHVFYYFYGNNESSTGKSWCPDCVLAEPITKEAFNRAAEGVSIVKVAVGNRESWKSPENVYRKEPFKVRCIPTIIRLDANSQESGRLEEXGLRCAGEDSQFHDWPLSDLCETLICRVNFAVAFGFYGLPILGIQDVM	0.39	0.78
	AS27, 4, 8, 9, 22	EZ762094	contig22753:96:617:3|similar to Thioredoxin, mitochondrial (Q95108)|Evalue: 2e-37	31	18916	1	6.9	173	9.58	MRTAVQRSAAALRKWSVGNLVVRRSVASLTRIQNGASLVTTPSSIWTRLTLHSTAQMSAKVSGGTASAVFNVQDEDDFQKRVIESKVPVLVDFHAKWCGPCKVLGPRLESSVDKEAGKVLLAKINIDDLSDLALKYNIKSVPTVLAMKGGQVVDKFVGLVDDDQIDTFITKMK	0.18	0.9
	EES21, 1, 3, 20, 26, 27	EZ762094	contig22753:96:617:3|similar to Thioredoxin, mitochondrial (Q95108)|Evalue: 2e-37	238	18916	5 (4)	28.3	173	9.58	MRTAVQRSAAALRKWSVGNLVVRRSVASLTRIQNGASLVTTPSSIWTRLTLHSTAQMSAKVSGGTASAVFNVQDEDDFQKRVIESKVPVLVDFHAKWCGPCKVLGPRLESSVDKEAGKVLLAKINIDDLSDLALKYNIKSVPTVLAMKGGQVVDKFVGLVDDDQIDTFITKMK	0.93	1.83
	TS5, 9, 17, 18	EZ762094	contig22753:96:617:3|similar to Thioredoxin, mitochondrial (Q95108)|Evalue: 2e-37	28	18916	1	6.9	173	9.58	MRTAVQRSAAALRKWSVGNLVVRRSVASLTRIQNGASLVTTPSSIWTRLTLHSTAQMSAKVSGGTASAVFNVQDEDDFQKRVIESKVPVLVDFHAKWCGPCKVLGPRLESSVDKEAGKVLLAKINIDDLSDLALKYNIKSVPTVLAMKGGQVVDKFVGLVDDDQIDTFITKMK	0.18	0.72
	EES21, 22	EZ759657	contig04013:1:332:3|similar to Thioredoxin-3 (P29447)|Evalue: 1e-20	167	12383	3	28.4	109	5.35	AKMSKIVHVSNKGELDRLLQDHPEKLMIIDFFANWCGPCRQIAPAFEKMSGEFTDVIFVKVDVDEAEDVAAAYDINVMPTFIFLKKGVKVDEFSGANDGKLKELLQKNK	1.08	1.71
	EES20, 19	EZ760140	contig07119:113:532:2|similar to Thioredoxin-like protein 4A (P83877)|Evalue: 7e-75	52	16553	1	7.9	139	5.77	MLPHLHNGWQVDQAILSEEDRVVLIRFGHDWDPTCMKMDEVLFGIAEKIKNFCVVYLVDITAVPDFNKMYELYDPCTVMFFFRNKHIMIDLGTGNNNKINWSMEDKQEMVDIIETVYRGARKGRGLVISLKDYSTKYRY	0.2	0.4
	AS18	EZ759183	contig01577:1:665:3|similar to Thioredoxin domain-containing protein 9 (Q9CQ79)|Evalue: 4e-48	167	25416	3	15.9	220	5.57	TKMERVIENKIFEATKVIENQLDSEIQRLDALSKDEDELEVLRERRLKAIRNESSKTQEWRSKGHGVYSELADEKEFFACVKSSEXAWFATFFLRTTIRCPILDAHLEKLAATHLETRFVKINAERSQFLAERLRIVVIPTVACVVDTKTVDYVVGFDELGGSDHFTTEMLEWRLARSKVLFYSGDLNKPPEVDVKPRGVLGYSKSKNLRSKADDSDDSD	0.45	0.45
	EES16, 17	EZ759183	contig01577:1:665:3|similar to Thioredoxin domain-containing protein 9 (Q9CQ79)|Evalue: 4e-48	195	25416	4	25.9	220	5.57	TKMERVIENKIFEATKVIENQLDSEIQRLDALSKDEDELEVLRERRLKAIRNESSKTQEWRSKGHGVYSELADEKEFFACVKSSEXAWFATFFLRTTIRCPILDAHLEKLAATHLETRFVKINAERSQFLAERLRIVVIPTVACVVDTKTVDYVVGFDELGGSDHFTTEMLEWRLARSKVLFYSGDLNKPPEVDVKPRGVLGYSKSKNLRSKADDSDDSD	0.64	0.92
glutaredoxin family	EES19, 18	EZ761223	contig18103:93:590:3|similar to Glutaredoxin-related protein 5 (Q80Y14)|Evalue: 3e-36	123	18466	2	13.9	165	8.8	MLSSVTSRLVQSIVRQPMRRTFGSSAALRNITDDQRMEFKQLTTSDKVVVFMKGSPSEPKCGFSSAVCQILTKHGITKFASFDVLNNDNLRQGIKEYTNWPTIPQVFINGEFIGGCDIMLQMHKSGELTHTLTKAGLESALKDSSQSSQTEEQKKDQSKTPEGTL	0.4	0.8
	EES21, 20	EZ762568	contig24507:1:284:2|similar to Glutaredoxin-1 (Q9ESH6)|Evalue: 5e-11	256	10501	5	38.3	94	9.17	VTTSTRVSAMAELKAREFVDSKLANKKVLVISKTYCPYCTKAKNVLGNYDIKKDQFEVVELDKMADSEMANAIQQIMKERTGASSVPRVFIGGS	3.13	3.46
	AS15	EZ761309	contig18548:126:1097:3|similar to Glutaredoxin-3 (Q28ID3)|Evalue: 5e-82	82	37202	2	7.1	323	5.3	MSMVNVKSAEEFEKFLNEHRDAMVLXFFFANWAPECQQMSDILMELSKDSKXSFCKFLQIEADSNDLQTITEKYKVQSVPTFLFIREAKEIDRIVGANGPEVNRKLRIFVENYVPPVKRDNFEERLKSLMNFDRIMLFMKGSPAVPQCGFSRQTVEILNKMAVKYSHFDILSDNEVREQLKKLVNWPTYPMLFIDGQLIGGLDIIKELVASGEFEKMLPKEETLDDKLKALINEASVMLFMKGSPDNPKCGFSRQIVQILNDCNAKYQHFDILTDNEVREGLKVFSKWPTYPQLYANGELLGGLDIVKELQAGGELKGALGLA	0.19	0.19
	EES14	EZ761309	contig18548:126:1097:3|similar to Glutaredoxin-3 (Q28ID3)|Evalue: 5e-82	251	37202	5	17.3	323	5.3	MSMVNVKSAEEFEKFLNEHRDAMVLXFFFANWAPECQQMSDILMELSKDSKXSFCKFLQIEADSNDLQTITEKYKVQSVPTFLFIREAKEIDRIVGANGPEVNRKLRIFVENYVPPVKRDNFEERLKSLMNFDRIMLFMKGSPAVPQCGFSRQTVEILNKMAVKYSHFDILSDNEVREQLKKLVNWPTYPMLFIDGQLIGGLDIIKELVASGEFEKMLPKEETLDDKLKALINEASVMLFMKGSPDNPKCGFSRQIVQILNDCNAKYQHFDILTDNEVREGLKVFSKWPTYPQLYANGELLGGLDIVKELQAGGELKGALGLA	0.53	0.53
	TS15	EZ761309	contig18548:126:1097:3|similar to Glutaredoxin-3 (Q28ID3)|Evalue: 5e-82	114	37202	3	8	323	5.3	MSMVNVKSAEEFEKFLNEHRDAMVLXFFFANWAPECQQMSDILMELSKDSKXSFCKFLQIEADSNDLQTITEKYKVQSVPTFLFIREAKEIDRIVGANGPEVNRKLRIFVENYVPPVKRDNFEERLKSLMNFDRIMLFMKGSPAVPQCGFSRQTVEILNKMAVKYSHFDILSDNEVREQLKKLVNWPTYPMLFIDGQLIGGLDIIKELVASGEFEKMLPKEETLDDKLKALINEASVMLFMKGSPDNPKCGFSRQIVQILNDCNAKYQHFDILTDNEVREGLKVFSKWPTYPQLYANGELLGGLDIVKELQAGGELKGALGLA	0.29	0.29
ahpC/TSA family	AS19, 18-22	EZ762425	contig24044:157:536:1|similar to Peroxiredoxin-2 (Q2PFZ3)|Evalue: 2e-33	270	14240	9 (4)	28.6	126	5.61	MSSKQCLKIGSPAPDFKAVAVIDGQFQDIQLSTLKGKYVVLLFYPLDFTFVCPTEILAFSSRMDDFAKMDTVVLGISCDSHFTHLAWMNTPKKDGGLGPLKLPLLSDMTHEISMNYNIYMEEHGHS	1.93	3.19
	EES17, 16-19	EZ762425	contig24044:157:536:1|similar to Peroxiredoxin-2 (Q2PFZ3)|Evalue: 2e-33	269	14240	9 (5)	47.6	126	5.61	MSSKQCLKIGSPAPDFKAVAVIDGQFQDIQLSTLKGKYVVLLFYPLDFTFVCPTEILAFSSRMDDFAKMDTVVLGISCDSHFTHLAWMNTPKKDGGLGPLKLPLLSDMTHEISMNYNIYMEEHGHS	2.63	4.02
	TS19, 18-21	EZ762425	contig24044:157:536:1|similar to Peroxiredoxin-2 (Q2PFZ3)|Evalue: 2e-33	322	14240	11 (5)	47.6	126	5.61	MSSKQCLKIGSPAPDFKAVAVIDGQFQDIQLSTLKGKYVVLLFYPLDFTFVCPTEILAFSSRMDDFAKMDTVVLGISCDSHFTHLAWMNTPKKDGGLGPLKLPLLSDMTHEISMNYNIYMEEHGHS	2.63	4.62
	AS17, 18	EZ762399	contig23916:1:215:3|similar to Peroxiredoxin-2 (Q8K3U7)|Evalue: 7e-30	96	7931	4 (2)	25.7	70	5.69	FIIDKKGILRQITMNDLPVGRSVDETIRLVQAFQYTDVHGEVCPAGWKPGSDTIKPQPDESKEYFSKVNA	2.03	3.12
	TS17, 18	EZ762399	contig23916:1:215:3|similar to Peroxiredoxin-2 (Q8K3U7)|Evalue: 7e-30	138	7931	4 (3)	74.3	70	5.69	FIIDKKGILRQITMNDLPVGRSVDETIRLVQAFQYTDVHGEVCPAGWKPGSDTIKPQPDESKEYFSKVNA	2.03	3.12
	AS19, 17, 20	EZ761908	contig21646:1:212:3|similar to Peroxiredoxin-2 (Q8K3U7)|Evalue: 7e-29	187	7722	6 (3)	75.4	69	6.07	FIIDQKGILRQITVNDLPVGRSVDETIRLVQAFQYTDIHGEVCPAGWKPGSDTIKPEPGASKEYFTKHG	5.5	7.06
	EES18, 16-18	EZ761908	contig21646:1:212:3|similar to Peroxiredoxin-2 (Q8K3U7)|Evalue: 7e-29	106	7722	4 (2)	26.1	69	6.07	FIIDQKGILRQITVNDLPVGRSVDETIRLVQAFQYTDIHGEVCPAGWKPGSDTIKPEPGASKEYFTKHG	2.07	3.63
	TS19, 20	EZ761908	contig21646:1:212:3|similar to Peroxiredoxin-2 (Q8K3U7)|Evalue: 7e-29	156	7722	8 (3)	75.4	69	6.07	FIIDQKGILRQITVNDLPVGRSVDETIRLVQAFQYTDIHGEVCPAGWKPGSDTIKPEPGASKEYFTKHG	3.47	3.92
	AS17, 16	EZ761016	contig17026:72:905:3|similar to Peroxiredoxin-2 (Q2PFZ3)|Evalue: 5e-75	215	31093	8 (4)	17.3	277	8.64	MIRSSVSRLGRSLQRLPSALESPLFAIYGRRSLVTCALRLNNSRSQSSSAQSQQTFTEDNASLRSASNEQSCNSSQRVTARVQQKAPDFKGTAVVNGGFKDIKLSDYKGKYVILLFYPADFTFVCPTEIIAFSNAAQQFRQLNTEVIAISTDSHFSHLAWTNVARSEGGLGKMDIPLLADFHKRISRDYGVLIEEEGIALRGMFLIDDQQILRQMTVNDLPVGRSVTEALRLIQAFQFVAEHGEVCPIDWEPNTNSATIKPDPEKSKEYFHKTAKGQ	0.66	1.02
	EES15, 16	EZ761016	contig17026:72:905:3|similar to Peroxiredoxin-2 (Q2PFZ3)|Evalue: 5e-75	151	31093	3	12.3	277	8.64	MIRSSVSRLGRSLQRLPSALESPLFAIYGRRSLVTCALRLNNSRSQSSSAQSQQTFTEDNASLRSASNEQSCNSSQRVTARVQQKAPDFKGTAVVNGGFKDIKLSDYKGKYVILLFYPADFTFVCPTEIIAFSNAAQQFRQLNTEVIAISTDSHFSHLAWTNVARSEGGLGKMDIPLLADFHKRISRDYGVLIEEEGIALRGMFLIDDQQILRQMTVNDLPVGRSVTEALRLIQAFQFVAEHGEVCPIDWEPNTNSATIKPDPEKSKEYFHKTAKGQ	0.36	0.59
	TS17, 11, 16	EZ761016	contig17026:72:905:3|similar to Peroxiredoxin-2 (Q2PFZ3)|Evalue: 5e-75	352	31093	8 (5)	24.5	277	8.64	MIRSSVSRLGRSLQRLPSALESPLFAIYGRRSLVTCALRLNNSRSQSSSAQSQQTFTEDNASLRSASNEQSCNSSQRVTARVQQKAPDFKGTAVVNGGFKDIKLSDYKGKYVILLFYPADFTFVCPTEIIAFSNAAQQFRQLNTEVIAISTDSHFSHLAWTNVARSEGGLGKMDIPLLADFHKRISRDYGVLIEEEGIALRGMFLIDDQQILRQMTVNDLPVGRSVTEALRLIQAFQFVAEHGEVCPIDWEPNTNSATIKPDPEKSKEYFHKTAKGQ	0.84	1.2
	AS18, 16-18	EZ762590	contig24578:1:638:1|similar to Peroxiredoxin-4 (O08807)|Evalue: 8e-51	313	23970	8 (7)	42	212	6.72	AVVHIMTGDXXEHLSLLFKVKFGKEXVAQTCTFPVVIFIPQKMLRFLGILVFIACIYVVNSSGDDRCNVYGSGDVYPERSRVTDHSVHWSKTQIGKPAPDFKGVTAVIKGKFENVNLSDYKGKYVVLLFYPLDFTFVCPTEIIAFSERTDEFKKMDTVVLGISTDSAYTHLQWIKTARKDGGLGPIQLPLLSDMTHQMSKDYGVYLEDAGHT	1.49	2.82
	EES16, 15	EZ762590	contig24578:1:638:1|similar to Peroxiredoxin-4 (O08807)|Evalue: 8e-51	372	23970	12 (8)	42	212	6.72	AVVHIMTGDXXEHLSLLFKVKFGKEXVAQTCTFPVVIFIPQKMLRFLGILVFIACIYVVNSSGDDRCNVYGSGDVYPERSRVTDHSVHWSKTQIGKPAPDFKGVTAVIKGKFENVNLSDYKGKYVVLLFYPLDFTFVCPTEIIAFSERTDEFKKMDTVVLGISTDSAYTHLQWIKTARKDGGLGPIQLPLLSDMTHQMSKDYGVYLEDAGHT	1.84	2.32
	TS17, 18, 20	EZ762590	contig24578:1:638:1|similar to Peroxiredoxin-4 (O08807)|Evalue: 8e-51	269	23970	7 (6)	36.8	212	6.72	AVVHIMTGDXXEHLSLLFKVKFGKEXVAQTCTFPVVIFIPQKMLRFLGILVFIACIYVVNSSGDDRCNVYGSGDVYPERSRVTDHSVHWSKTQIGKPAPDFKGVTAVIKGKFENVNLSDYKGKYVVLLFYPLDFTFVCPTEIIAFSERTDEFKKMDTVVLGISTDSAYTHLQWIKTARKDGGLGPIQLPLLSDMTHQMSKDYGVYLEDAGHT	1.19	2.25
	AS19, 18	EZ761733	contig20474:30:605:3|similar to Peroxiredoxin-5, mitochondrial (P30044)|Evalue: 2e-48	198	21105	6 (4)	24.6	191	9.2	MYRSLAKVVSSTVVRSEARGFHSTAAVALQAGDRIPNVELMENTPGTKVNIADLFKGKKGILLGVPGAFTPNCDQKHLPSYVKNYDQLKKKGVDIAVCVAVNDPFVTAAWAKQQNAEGKVRILADPQGRFVKEIGMEKDMAAILGNKRCKRFSLIVNDGKIEKVYEEPDGTGATCSLADNMMNDLEKYLKK	0.81	1.15
	EES18, 17	EZ761733	contig20474:30:605:3|similar to Peroxiredoxin-5, mitochondrial (P30044)|Evalue: 2e-48	140	21105	4 (3)	20.4	191	9.2	MYRSLAKVVSSTVVRSEARGFHSTAAVALQAGDRIPNVELMENTPGTKVNIADLFKGKKGILLGVPGAFTPNCDQKHLPSYVKNYDQLKKKGVDIAVCVAVNDPFVTAAWAKQQNAEGKVRILADPQGRFVKEIGMEKDMAAILGNKRCKRFSLIVNDGKIEKVYEEPDGTGATCSLADNMMNDLEKYLKK	0.56	0.9
	TS19, 18	EZ761733	contig20474:30:605:3|similar to Peroxiredoxin-5, mitochondrial (P30044)|Evalue: 2e-48	158	21105	5 (3)	20.4	191	9.2	MYRSLAKVVSSTVVRSEARGFHSTAAVALQAGDRIPNVELMENTPGTKVNIADLFKGKKGILLGVPGAFTPNCDQKHLPSYVKNYDQLKKKGVDIAVCVAVNDPFVTAAWAKQQNAEGKVRILADPQGRFVKEIGMEKDMAAILGNKRCKRFSLIVNDGKIEKVYEEPDGTGATCSLADNMMNDLEKYLKK	0.56	0.72
	EES18	EZ761225	contig18110:116:595:2|similar to Peroxiredoxin-5, mitochondrial (Q9GLW9)|Evalue: 2e-44	94	17501	2	16.4	159	6.82	MTIKIGDELPSAKVFDGTVEKLVDIRDLFKGKKGILFGLPGAFTPGCSSRHLPSYVKKYDDLKGKGIEVIACVSVNDPFVMQAWGKEHQTADKVHLLADPRGNFTRAVGLELEASDVLGNARSKRYSAIVQDNKILKLNIEPDGTGVECSIADRIINDI	0.42	0.42
	AS19, 18	EZ759055	contig00858:452:928:2|similar to Peroxiredoxin-6 (Q5ZJF4)|Evalue: 3e-45	445	17552	16 (8)	63.9	158	5.66	MIALSCDDAQSHQGWIKDLESYCGMGGGKFPFEIIADPDRSLAIKFGMLDPDELNSNNMPVTARAVYVIGPDRKVKLVLIYPATSGRNFDELLRVLDSLQLVSKHSVVTPVDWKVGDKVIVPPNIPKDELATKYPQGVDVYPLPSGKEYLRFTTAPKS	5.94	6.96
	EES17, 16-18	EZ759055	contig00858:452:928:2|similar to Peroxiredoxin-6 (Q5ZJF4)|Evalue: 3e-45	322	17552	10 (6)	49.4	158	5.66	MIALSCDDAQSHQGWIKDLESYCGMGGGKFPFEIIADPDRSLAIKFGMLDPDELNSNNMPVTARAVYVIGPDRKVKLVLIYPATSGRNFDELLRVLDSLQLVSKHSVVTPVDWKVGDKVIVPPNIPKDELATKYPQGVDVYPLPSGKEYLRFTTAPKS	1.88	2.26
	TS19, 18	EZ759055	contig00858:452:928:2|similar to Peroxiredoxin-6 (Q5ZJF4)|Evalue: 3e-45	455	17552	17 (10)	75.9	158	5.66	MIALSCDDAQSHQGWIKDLESYCGMGGGKFPFEIIADPDRSLAIKFGMLDPDELNSNNMPVTARAVYVIGPDRKVKLVLIYPATSGRNFDELLRVLDSLQLVSKHSVVTPVDWKVGDKVIVPPNIPKDELATKYPQGVDVYPLPSGKEYLRFTTAPKS	5.94	7.82
	AS19	EZ760281	contig08182:1:405:1|similar to Thioredoxin-dependent peroxide reductase, mitochondrial (P20108)|Evalue: 7e-47	70	15062	2	19.4	134	5.95	RDINCEVLASSVDSEYAHLAWIQTPRNKGGLGEMKIPLLADVSKKIATDFGALFSEEGVALRASFIVDRKGVVRHASYNDLPIGRSVDEMLRLVKAIQFFDEHGEVCPANWQPGSKTMKAHPEDSKEFFESVHR	0.5	0.5
	TS19, 20	EZ760281	contig08182:1:405:1|similar to Thioredoxin-dependent peroxide reductase, mitochondrial (P20108)|Evalue: 7e-47	126	15062	2	19.4	134	5.95	RDINCEVLASSVDSEYAHLAWIQTPRNKGGLGEMKIPLLADVSKKIATDFGALFSEEGVALRASFIVDRKGVVRHASYNDLPIGRSVDEMLRLVKAIQFFDEHGEVCPANWQPGSKTMKAHPEDSKEFFESVHR	0.5	0.73
glutathione peroxidase family	AS19, 18	EZ761081	contig17497:1:693:1|similar to Glutathione peroxidase (Q00277)|Evalue: 5e-45	403	26115	16 (8)	42.2	230	6.36	VPLKVQLLSDMKVLSRLLTPYLKQLSSTYVNISSNCLKSISDNQCISVSSCLQYSTKANMADPKSASSIYDFHAKDIDGNDVSLDKYRGNVCMVVNVXLQMWIYDEGYEGLAEMIKKHETEGFKVLAFPSNQFASQEPWPEPQIKEFVQQFSDRFDLFSKINVNGGETHPLYKFLKSKQGGTLGDFIKWNFTMFLVDRNGQPVKRYGPSENPQQAEPDVVAALKGQAVPQ	2.33	2.46
	EES17, 18	EZ761081	contig17497:1:693:1|similar to Glutathione peroxidase (Q00277)|Evalue: 5e-45	312	26115	8 (6)	36.1	230	6.36	VPLKVQLLSDMKVLSRLLTPYLKQLSSTYVNISSNCLKSISDNQCISVSSCLQYSTKANMADPKSASSIYDFHAKDIDGNDVSLDKYRGNVCMVVNVXLQMWIYDEGYEGLAEMIKKHETEGFKVLAFPSNQFASQEPWPEPQIKEFVQQFSDRFDLFSKINVNGGETHPLYKFLKSKQGGTLGDFIKWNFTMFLVDRNGQPVKRYGPSENPQQAEPDVVAALKGQAVPQ	1.32	1.76
	TS19	EZ761081	contig17497:1:693:1|similar to Glutathione peroxidase (Q00277)|Evalue: 5e-45	403	26115	17 (8)	42.2	230	6.36	VPLKVQLLSDMKVLSRLLTPYLKQLSSTYVNISSNCLKSISDNQCISVSSCLQYSTKANMADPKSASSIYDFHAKDIDGNDVSLDKYRGNVCMVVNVXLQMWIYDEGYEGLAEMIKKHETEGFKVLAFPSNQFASQEPWPEPQIKEFVQQFSDRFDLFSKINVNGGETHPLYKFLKSKQGGTLGDFIKWNFTMFLVDRNGQPVKRYGPSENPQQAEPDVVAALKGQAVPQ	2.33	2.33
class-I pyridine nucleotide-disulfide oxidoreductase family	AS9, 10	EZ763281	contig28039:246:1925:3|similar to Thioredoxin reductase 1, cytoplasmic (Q16881)|Evalue: 1e-165	641	61478	15 (12)	34.3	559	5.81	MENGPEIQSILLEISGQKTVPNVFIRGAHIGGNDAVTKMHAEGKLVPSLGLDKVDSAASGDQDSQDLGTYDYDLVVIGGGSGGLACSKQAAKLGAKVAVCDFVVPTPMGTTWGLGGTCVNVGCIPKKLMHYASMNGEALQESTEFGWNIQKDGITHDWNRMIQNIQDYIHSLNFKYRVQLKENNVEYINGFAKFTEPHKLHIRMKNGKEREITTKHAIIAVGGRPKYPEIPGDKEYCITSDDMFSLAYAPGKTLVVGASYVALECAGFLTGLGYDTTVMVRSIFLRGFDQDMAERIAKYMEEHKKTRMIRGAVPVKIEQIEPRTESKAGLLRVTSKTTDGKEITEEYNTVLLAIGRTACTAEIGLXKVGVELNKQNGKIHTTAERTNVPWVYAIGDVLD…	0.97	1.08
	EES9, 8	EZ763281	contig28039:246:1925:3|similar to Thioredoxin reductase 1, cytoplasmic (Q16881)|Evalue: 1e-165	196	61478	4	13.2	559	5.81	MENGPEIQSILLEISGQKTVPNVFIRGAHIGGNDAVTKMHAEGKLVPSLGLDKVDSAASGDQDSQDLGTYDYDLVVIGGGSGGLACSKQAAKLGAKVAVCDFVVPTPMGTTWGLGGTCVNVGCIPKKLMHYASMNGEALQESTEFGWNIQKDGITHDWNRMIQNIQDYIHSLNFKYRVQLKENNVEYINGFAKFTEPHKLHIRMKNGKEREITTKHAIIAVGGRPKYPEIPGDKEYCITSDDMFSLAYAPGKTLVVGASYVALECAGFLTGLGYDTTVMVRSIFLRGFDQDMAERIAKYMEEHKKTRMIRGAVPVKIEQIEPRTESKAGLLRVTSKTTDGKEITEEYNTVLLAIGRTACTAEIGLXKVGVELNKQNGKIHTTAERTNVPWVYAIGDVLD…	0.23	0.34
	TS9, 10	EZ763281	contig28039:246:1925:3|similar to Thioredoxin reductase 1, cytoplasmic (Q16881)|Evalue: 1e-165	416	61478	12 (8)	23.4	559	5.81	MENGPEIQSILLEISGQKTVPNVFIRGAHIGGNDAVTKMHAEGKLVPSLGLDKVDSAASGDQDSQDLGTYDYDLVVIGGGSGGLACSKQAAKLGAKVAVCDFVVPTPMGTTWGLGGTCVNVGCIPKKLMHYASMNGEALQESTEFGWNIQKDGITHDWNRMIQNIQDYIHSLNFKYRVQLKENNVEYINGFAKFTEPHKLHIRMKNGKEREITTKHAIIAVGGRPKYPEIPGDKEYCITSDDMFSLAYAPGKTLVVGASYVALECAGFLTGLGYDTTVMVRSIFLRGFDQDMAERIAKYMEEHKKTRMIRGAVPVKIEQIEPRTESKAGLLRVTSKTTDGKEITEEYNTVLLAIGRTACTAEIGLXKVGVELNKQNGKIHTTAERTNVPWVYAIGDVLD…	0.68	0.73
Oxidoreductases
peroxidase family. XPO subfamily.	AS8, 9	EZ762777	contig25378:1:753:2|similar to Chorion peroxidase (P82600)|Evalue: 4e-35	70	28780	2	7.2	250	6.42	LAAPRANSVVKDGGGRPFALPNPRWISSNVNHGEARLHPTVTLITMAYGQFFDHDFTNTPITLVRNKPGEATPPTCCNVPLECRHEACFPISIPADDPLYGKAGVRCMEFVRSLPSPKPDCTFGPREPMNQNSHFVDMSQVYASSLEEANGLRAFERGQLRINTSPLAMDFRMMLPPEEKDTLDCQRLDESRTCFKAGDNRINVQTSLTAMHVIWLREHNRVADFIWRNRPDLPDELIYQEARRIMIAQY	0.25	0.37
eggshell chorion assembly	TS8, 9	EZ762777	contig25378:1:753:2|similar to Chorion peroxidase (P82600)|Evalue: 4e-35	41	28780	1	2.8	250	6.42	LAAPRANSVVKDGGGRPFALPNPRWISSNVNHGEARLHPTVTLITMAYGQFFDHDFTNTPITLVRNKPGEATPPTCCNVPLECRHEACFPISIPADDPLYGKAGVRCMEFVRSLPSPKPDCTFGPREPMNQNSHFVDMSQVYASSLEEANGLRAFERGQLRINTSPLAMDFRMMLPPEEKDTLDCQRLDESRTCFKAGDNRINVQTSLTAMHVIWLREHNRVADFIWRNRPDLPDELIYQEARRIMIAQY	0.12	0.12
	AS7	EZ759779	contig04779:1:1782:1|similar to Chorion peroxidase (Q9VEG6)|Evalue: 6e-75	88	67503	2	3.9	593	8.45	QRNRNELLPSARQVSVGLSRGGHRPDNRWTLMVMQFAQFVTHDITNTPMELVDSPQTPGRSIMPACCDVAPNCRHPSCFPIDVSPNDPFYAQFKVTCLEFVRAQPATSSDCKITERNPLNINSHFLDASAIYGSQLKVAMQLRTGNQGFMRINQNPGMLRAIPGGPDSMSCRADGPQRPCMVSGDSRTNQHSGVVAMHTLFLREHERIALFISQRNPQMHDEAIYQITRKIVGAILQHITYSELVPAFVGSRIYNDERNGLRLLQHGHCETCYDKSVNPSMSVEFAGAAFRCHTIIPDHLPARNTSVASMPFYEHMLNPRVFYMSGMIDDVLRSLVKSPMQSFDPIFSTFAQNLVFKPAHLPYGHDMLSLNVQRGRDLGVPTYVEMRDICGLPPVTKFK…	0.1	0.1
	TS7	EZ759779	contig04779:1:1782:1|similar to Chorion peroxidase (Q9VEG6)|Evalue: 6e-75	91	67503	3	4.4	593	8.45	QRNRNELLPSARQVSVGLSRGGHRPDNRWTLMVMQFAQFVTHDITNTPMELVDSPQTPGRSIMPACCDVAPNCRHPSCFPIDVSPNDPFYAQFKVTCLEFVRAQPATSSDCKITERNPLNINSHFLDASAIYGSQLKVAMQLRTGNQGFMRINQNPGMLRAIPGGPDSMSCRADGPQRPCMVSGDSRTNQHSGVVAMHTLFLREHERIALFISQRNPQMHDEAIYQITRKIVGAILQHITYSELVPAFVGSRIYNDERNGLRLLQHGHCETCYDKSVNPSMSVEFAGAAFRCHTIIPDHLPARNTSVASMPFYEHMLNPRVFYMSGMIDDVLRSLVKSPMQSFDPIFSTFAQNLVFKPAHLPYGHDMLSLNVQRGRDLGVPTYVEMRDICGLPPVTKFK…	0.1	0.1
	EES5, 5-7, 13, 14	EZ760803	contig13216:1:1478:3|similar to Peroxidasin homolog (Q3UQ28)|Evalue: 7e-114	45	56689	2 (1)	2.4	491	5.6	YGNTDLMAPILEMMAVGGLLRVSLPAPGTTQPLLPYYDPLTAPEEVDCKRAQSDERQFPCFIAGDGRANEQLALTAMHTIWVREHNRIAQKLFEMNSHWHSERIFQETRKIVYAQIXAITYEQWLPQIFGQRGMQLLRSYDGYKPEVDSTIANNFATAVLRMGHSTISPILRRLNESFSTIEFGDLPLHEAFFASHRLRDEGGTDPLLRGLFASPAKLLHKTQLMNSELTDRLFFTSTRTHRIPLDLAALNIQRGRDHGLPSYLEFRRFCNLSVPMNFTGLRSEMDPNQIKKLEDVYGHPGNVDLFAGAMSERPLPNSKVGXYFYVSIGDQFRRLRDGDRFWYENPGAFTPEQLKEIKESSLARIVCDNSDTIDKVQRDIFILPHAQEDSTMGYELCDE…	0.06	0.3
	AS8, 9	EZ760633	contig11268:1:905:3|similar to Peroxidasin (Q9VZZ4)|Evalue: 6e-41	376	34082	6 (5)	26.7	300	5.3	GEFLPVLIGERIAMDERNGVRLANGVWHGYNPEVNPGTWVEMSTAAYRLHTIVQNWLPLKRTVQEDFKPLHEYFFSPYYCYEPGALDNLAEGLCHENVQAFDNQVTTELAGRLFQAADEPFGLDLVALNLQRGRDHGLATYNDVREFCGLPRAKSFKDFEDTMSPKSIASLAKVYRHVDDVDFFMGGVSENPVNRGDGLVGPVVACIITGQFRDWRAGDRYWYENPGQFSERELKEIGRASFSGIICDNTNIKKLQPLVFVDAVDKLNPRMPCSQIPRMNLQVFLDGLPAHGAQPASHXX	0.75	0.85
	EES9, 8	EZ760633	contig11268:1:905:3|similar to Peroxidasin (Q9VZZ4)|Evalue: 6e-41	122	34082	2	10.7	300	5.3	GEFLPVLIGERIAMDERNGVRLANGVWHGYNPEVNPGTWVEMSTAAYRLHTIVQNWLPLKRTVQEDFKPLHEYFFSPYYCYEPGALDNLAEGLCHENVQAFDNQVTTELAGRLFQAADEPFGLDLVALNLQRGRDHGLATYNDVREFCGLPRAKSFKDFEDTMSPKSIASLAKVYRHVDDVDFFMGGVSENPVNRGDGLVGPVVACIITGQFRDWRAGDRYWYENPGQFSERELKEIGRASFSGIICDNTNIKKLQPLVFVDAVDKLNPRMPCSQIPRMNLQVFLDGLPAHGAQPASHXX	0.2	0.3
	TS8	EZ760633	contig11268:1:905:3|similar to Peroxidasin (Q9VZZ4)|Evalue: 6e-41	175	34082	4	18	300	5.3	GEFLPVLIGERIAMDERNGVRLANGVWHGYNPEVNPGTWVEMSTAAYRLHTIVQNWLPLKRTVQEDFKPLHEYFFSPYYCYEPGALDNLAEGLCHENVQAFDNQVTTELAGRLFQAADEPFGLDLVALNLQRGRDHGLATYNDVREFCGLPRAKSFKDFEDTMSPKSIASLAKVYRHVDDVDFFMGGVSENPVNRGDGLVGPVVACIITGQFRDWRAGDRYWYENPGQFSERELKEIGRASFSGIICDNTNIKKLQPLVFVDAVDKLNPRMPCSQIPRMNLQVFLDGLPAHGAQPASHXX	0.45	0.45
	AS8	EZ760486	contig09780:655:1395:1|similar to Peroxidasin homolog (Q92626)|Evalue: 2e-14	338	27061	7 (6)	30.4	247	8.99	MPTFQMPFFQMQPFKFATINEQFPQLSTQTLTNFIKKAQEQAATQFTSFPNNGLLGFTPLNFTFPILPFGSPGSQSGIFTTSRPESIDKAKDAVTSEQVSKQVAKELGLNKTSAPDALSNVILPTSKDKPTACNDDDIPVVSLANPFDARTLPACAKSKYRSRDGSCNNIAFQKRGKESTNFVRLLAADYADGISQPRRSNVGQTALPSARAVSAAVIGLTVNPAPTWTSMFMQYGQFLDHDLTHTP	1.25	1.25
	TS8	EZ760486	contig09780:655:1395:1|similar to Peroxidasin homolog (Q92626)|Evalue: 2e-14	304	27061	8 (5)	30.4	247	8.99	MPTFQMPFFQMQPFKFATINEQFPQLSTQTLTNFIKKAQEQAATQFTSFPNNGLLGFTPLNFTFPILPFGSPGSQSGIFTTSRPESIDKAKDAVTSEQVSKQVAKELGLNKTSAPDALSNVILPTSKDKPTACNDDDIPVVSLANPFDARTLPACAKSKYRSRDGSCNNIAFQKRGKESTNFVRLLAADYADGISQPRRSNVGQTALPSARAVSAAVIGLTVNPAPTWTSMFMQYGQFLDHDLTHTP	1.01	1.01
	AS8	EZ760209	contig07623:1:1128:1|similar to Peroxidasin homolog (Q3UQ28)|Evalue: 6e-59	381	42915	6	19.9	376	8.69	IPATDPFYKQFSQRCMEFVRSLPGPKANCNLGPRDQLNQLSAFIDAGMVYGTTAEEVKSLRSFFARDAKVISPIPQKSKXXXSATWRIRWXRVWMERRTNLAFKAGDVRANVQIGLQTMHTLWMRHHNNVAEQLLALNPNWDDETVYQEXRAIIIAQIQHITYNEWLPLLVATLSYNKXKLLLSEQKVNQYNISVNPSMSNEFATAAFRVGHAMVTGTFDRLSLNLQSTVKNDKMSDTYFKSAHLYQENAVDQVAMGLCQRPGKIVEAEVTGELSQRLFKTSPDFGLDLVALNVQRGRDHGLPDYMKYRAFCGFPTANNFNELKALNIMSEAVVNRFASIYKNVQDIDLYVAGLSENRLPDAFIGPTFACLIGEQF	0.56	0.56
	TS8	EZ760209	contig07623:1:1128:1|similar to Peroxidasin homolog (Q3UQ28)|Evalue: 6e-59	352	42915	8 (6)	25.3	376	8.69	IPATDPFYKQFSQRCMEFVRSLPGPKANCNLGPRDQLNQLSAFIDAGMVYGTTAEEVKSLRSFFARDAKVISPIPQKSKXXXSATWRIRWXRVWMERRTNLAFKAGDVRANVQIGLQTMHTLWMRHHNNVAEQLLALNPNWDDETVYQEXRAIIIAQIQHITYNEWLPLLVATLSYNKXKLLLSEQKVNQYNISVNPSMSNEFATAAFRVGHAMVTGTFDRLSLNLQSTVKNDKMSDTYFKSAHLYQENAVDQVAMGLCQRPGKIVEAEVTGELSQRLFKTSPDFGLDLVALNVQRGRDHGLPDYMKYRAFCGFPTANNFNELKALNIMSEAVVNRFASIYKNVQDIDLYVAGLSENRLPDAFIGPTFACLIGEQF	0.56	0.56
	AS7, 5-10	EZ762049	contig22552:1:2159:2|similar to Peroxidasin (A4IGL7)|Evalue: 7e-54	1462	84539	47 (24)	55.8	719	5.64	TVARKAYYQGNYQCVLGGYPSGIGNYFLKWFTTKDSTTDDVRYAETLVFVAEWLWNNYYGNKEDLFMVFKNVNADTEPYLKECYDKRYRKWKCDINQKYRSIDGSCNNIAYPSWGATGEQEIRITKRWMYEDRISAPVQSWWVPGPDGQRYPMAGCREVNNALNSQYSDCNVWDHNSLAVSFGQFLSHDMVSTPMYRVPDVYSGTNVVPGCCNTQPNCRHYSCIPIPVPANDPHYSRWYKDCLEMVRAVPAEDYCRPGPWDPVNQQTSYVDLSHVYGATCEVNNKIRAYRKGKLRINKGYYGLYSQNILLPYNDGPENLGICLKTQRSDSNMGCFLGGDPRTNQNPALTALQTLYMRMHNRLANSCSKHMERYYLTEDVLDEICFQETRRVMIAIQQIV…	2.51	3.79
	TS7, 5-8	EZ762049	contig22552:1:2159:2|similar to Peroxidasin (A4IGL7)|Evalue: 7e-54	1328	84539	56 (23)	47.7	719	5.64	TVARKAYYQGNYQCVLGGYPSGIGNYFLKWFTTKDSTTDDVRYAETLVFVAEWLWNNYYGNKEDLFMVFKNVNADTEPYLKECYDKRYRKWKCDINQKYRSIDGSCNNIAYPSWGATGEQEIRITKRWMYEDRISAPVQSWWVPGPDGQRYPMAGCREVNNALNSQYSDCNVWDHNSLAVSFGQFLSHDMVSTPMYRVPDVYSGTNVVPGCCNTQPNCRHYSCIPIPVPANDPHYSRWYKDCLEMVRAVPAEDYCRPGPWDPVNQQTSYVDLSHVYGATCEVNNKIRAYRKGKLRINKGYYGLYSQNILLPYNDGPENLGICLKTQRSDSNMGCFLGGDPRTNQNPALTALQTLYMRMHNRLANSCSKHMERYYLTEDVLDEICFQETRRVMIAIQQIV…	2.01	2.75
zinc-containing alcohol dehydrogenase family. Quinone oxidoreductase subfamily.	AS14, 13-15, 18	EZ763175	contig27412:1:469:2|similar to Quinone oxidoreductase (P47199)|Evalue: 1e-15	163	17392	4 (3)	23.2	155	6.42	THGQGVDLILEMVASENIDKDCDLIGTRGTILVIGNRTKTTIDCRKLMGKESKIMGVYLANSTPEQWKQMGSELNRLVSEGKCRPVIDTVYQMAEAGKAHEHIMERKDGSKGKFVIEVQNLDHISSQQFHSHVVKADVHKTPRDPIEAIVSGIDH	0.7	1.27
	TS14	EZ763175	contig27412:1:469:2|similar to Quinone oxidoreductase (P47199)|Evalue: 1e-15	200	17392	6 (4)	28.4	155	6.42	THGQGVDLILEMVASENIDKDCDLIGTRGTILVIGNRTKTTIDCRKLMGKESKIMGVYLANSTPEQWKQMGSELNRLVSEGKCRPVIDTVYQMAEAGKAHEHIMERKDGSKGKFVIEVQNLDHISSQQFHSHVVKADVHKTPRDPIEAIVSGIDH	0.7	0.7
	AS15, 14, 17	EZ759039	contig00766:103:1068:1|similar to Quinone oxidoreductase (P47199)|Evalue: 6e-76	323	34835	8 (6)	23.4	321	6.31	MFGGPEVLQIETQVPIPEPDANEVLIRVAACGVNPVETYIRAGVFGVLPKTPYTPGGDAAGIVQKVGSGVTNVQAGQRVYVYSPVIMNSFGAYAQYMIASAWHVFPLPDKMSFEEGACLGIPYLTAMQALTGRSNVRNVLIHGASGGVGIAATQIAAAMGLQVYGTAGTEEGMFLIRQHGVSHAFNHREKGYEKQIMELTKGDGVDLILEMAAHTNLDRDCDLVAKKRXXIIIIGCQGPTTLDARKLMGKEATVEGLLLFQATREELLGYTTQLHKYLESGKCVPVIQKIYPLDQAAQAHKDIMDHGKPSTGKLIIKVQDI	0.73	0.93
	TS15, 14	EZ759039	contig00766:103:1068:1|similar to Quinone oxidoreductase (P47199)|Evalue: 6e-76	249	34835	6 (4)	15.9	321	6.31	MFGGPEVLQIETQVPIPEPDANEVLIRVAACGVNPVETYIRAGVFGVLPKTPYTPGGDAAGIVQKVGSGVTNVQAGQRVYVYSPVIMNSFGAYAQYMIASAWHVFPLPDKMSFEEGACLGIPYLTAMQALTGRSNVRNVLIHGASGGVGIAATQIAAAMGLQVYGTAGTEEGMFLIRQHGVSHAFNHREKGYEKQIMELTKGDGVDLILEMAAHTNLDRDCDLVAKKRXXIIIIGCQGPTTLDARKLMGKEATVEGLLLFQATREELLGYTTQLHKYLESGKCVPVIQKIYPLDQAAQAHKDIMDHGKPSTGKLIIKVQDI	0.44	0.64
	TS15	EZ761238	contig18169:1:682:3|similar to Quinone oxidoreductase (Q5R4S7)|Evalue: 3e-44	99	24228	3	25.2	226	5.95	TGQRVFTCDLSYEGHYAEMMVVDAAYCFPLPDNLSFTEGAALPCSYLTAMLALTSGNAKKGQTVLIHGASGGVGLAATQIARAMGLKVLGTAGSETGMSLIQNHGATRAFSHRSKDYTNDIMEYTGGRGVDLVLEMAAAANLDKDCDLIAKKGSIVVIGSSPTTTTIDCRKLMGQESSIRGIYLPSATPEDFKLMGHLLTHLVSQGACRPVIDTVYQMADAGKMHE	0.3	0.3
	TS15	EZ762699	contig25029:52:537:1|similar to Quinone oxidoreductase (Q6AYT0)|Evalue: 2e-38	109	17500	2	19.8	162	9.71	MKSSIFSSIIGRNTKAVRIHKFGGPEVLQLDTDVPIPEPQSNQVLIRVAYAGVNPVDTYIRSGNYKRVPPLPAAIGSDSAGVIEKVGSDVSSLKVGERVYTCSPFSAPNGSYAQFMTANATNVFPLSKRLLFEEGAALGTPYLTAMRALMRRKEAKTVLIHG	0.42	0.42
	AS14, 13-15	EZ761184	contig17906:1:693:3|similar to Quinone oxidoreductase (Q6AYT0)|Evalue: 4e-30	369	24795	6 (5)	34.3	230	6.77	CRFSASLPTQFPHTFSYPHLFFIDRKSKMMQAIRGHILGEPRTLIDQFVTEVPVPEPQQNQLLIRVAAVGLNPYEALSAAGVWERVPFAAGGDAAGIVEKTGAGVTDFQVGQRVYTCDLSYGGHYGELMVVDVAHCFPLPDNLSFIEGAALPCSYLTAMRALTFCGKAQKGQTVLIHGASGGLGLAAAQIACAMGLNVLGTAGSDAGLTLIQGHGVTRAFNHKSKDYTKE	0.88	1.31
	TS14, 15	EZ761184	contig17906:1:693:3|similar to Quinone oxidoreductase (Q6AYT0)|Evalue: 4e-30	380	24795	7 (5)	34.3	230	6.77	CRFSASLPTQFPHTFSYPHLFFIDRKSKMMQAIRGHILGEPRTLIDQFVTEVPVPEPQQNQLLIRVAAVGLNPYEALSAAGVWERVPFAAGGDAAGIVEKTGAGVTDFQVGQRVYTCDLSYGGHYGELMVVDVAHCFPLPDNLSFIEGAALPCSYLTAMRALTFCGKAQKGQTVLIHGASGGLGLAAAQIACAMGLNVLGTAGSDAGLTLIQGHGVTRAFNHKSKDYTKE	0.88	1.02
ferredoxin--NADP reductase type 1 family	AS12	EZ762977	contig26225:1:1238:3|similar to NADPH:adrenodoxin oxidoreductase, mitochondrial (P82861)|Evalue: 2e-104	62	46056	2	4.6	411	8.51	NVIHSFSNTAKEPNFRFYGLIDVGRDVKVEELLSHYHAVILSYGSSNDRFLNIPGEDGPNIVSARELVGWYNGVPENRYINMDLTSTDTAVIVGQGNVALDVARILLSPLDLLSATDITQHAYDALKGSKVKRVFLVGRRGPMQVAFTIRELRELVKLPDVGGVVDESDIESIKSQISSVVRQRKRLMELLVSIAGESSKKHQKNWFLKFLLKPRKIIRSDKGVEAVRFVVNRLEDPTALMTVAAPTDQYVTIPCGLVIRSIGYEGTQISPLIPFDRKRSVVTNTAGKVESVKGLYCSGWIKSGPIGVIQTTMMDAYETVDCLLADITSGSVDITDRKLGRYAIEQLLQERNCVSISFDEWERVDREEVTRGQLSGKTREKLIDILDIIRTAKGISYTP…	0.15	0.15
	TS12	EZ762977	contig26225:1:1238:3|similar to NADPH:adrenodoxin oxidoreductase, mitochondrial (P82861)|Evalue: 2e-104	163	46056	3	12.2	411	8.51	NVIHSFSNTAKEPNFRFYGLIDVGRDVKVEELLSHYHAVILSYGSSNDRFLNIPGEDGPNIVSARELVGWYNGVPENRYINMDLTSTDTAVIVGQGNVALDVARILLSPLDLLSATDITQHAYDALKGSKVKRVFLVGRRGPMQVAFTIRELRELVKLPDVGGVVDESDIESIKSQISSVVRQRKRLMELLVSIAGESSKKHQKNWFLKFLLKPRKIIRSDKGVEAVRFVVNRLEDPTALMTVAAPTDQYVTIPCGLVIRSIGYEGTQISPLIPFDRKRSVVTNTAGKVESVKGLYCSGWIKSGPIGVIQTTMMDAYETVDCLLADITSGSVDITDRKLGRYAIEQLLQERNCVSISFDEWERVDREEVTRGQLSGKTREKLIDILDIIRTAKGISYTP…	0.23	0.23
short-chain dehydrogenases/reductases (SDR) family	EES13, 14	EZ762260	contig23428:1:781:2|similar to Uncharacterized oxidoreductase yhxC (P40397)|Evalue: 2e-59	508	28547	17 (9)	38.2	259	5.17	FTLEGANVAIACLAEELKDAEETKRLCEANVETLVREMIKINPESEKEFLDEMTSVRKEGNARVIIVTGDVGSSAACKAMVEKTLAEFGRINILVNNAGEDHEQDDLLNVSEEQMKRTFATNIFSNFYLAKAVLPQMKRGDSIINCASVNPYMGHGEQIDYTATKGAMVSFTRALSTNLADKGIRVNCVAPGPIWTPLVVAESKPSDAKKHGNDEKMWPLGRHGEPCEVAPSFVFLASFDANYITGQTLHPNGGKVVNG	2.02	2.14
	TS14, 13, 16	EZ762260	contig23428:1:781:2|similar to Uncharacterized oxidoreductase yhxC (P40397)|Evalue: 2e-59	364	28547	12 (6)	29.3	259	5.17	FTLEGANVAIACLAEELKDAEETKRLCEANVETLVREMIKINPESEKEFLDEMTSVRKEGNARVIIVTGDVGSSAACKAMVEKTLAEFGRINILVNNAGEDHEQDDLLNVSEEQMKRTFATNIFSNFYLAKAVLPQMKRGDSIINCASVNPYMGHGEQIDYTATKGAMVSFTRALSTNLADKGIRVNCVAPGPIWTPLVVAESKPSDAKKHGNDEKMWPLGRHGEPCEVAPSFVFLASFDANYITGQTLHPNGGKVVNG	1.17	1.54
	AS14, 13	EZ762756	contig25297:1:781:2|similar to Uncharacterized oxidoreductase yhxC (P40397)|Evalue: 2e-58	511	28563	14 (9)	45.2	259	5.18	FTLEGANVAIACLAQEMKDAEETKRLCEANVETLVREMIKINPESEKEFLDEMTSVRKEGNARVIIVTGDVGSSAECKAMVEKTLAEFGRINILVNNAGEGHDQDDLLHVSEEQMKRTFATNIFSNFYLAKAVLPQMKRGDSIINCASVNPYMGKSKQIDYTATKGAMVSFTRALSTNLADKGIRVNCVAPGPIWTPLIVAENTPSGAKKHGEDEEEWPLGRHGEPCEVAPSFVFLASFDANYITGQTLHPNGGKVVNG	2.02	2.41
	EES13, 12	EZ762756	contig25297:1:781:2|similar to Uncharacterized oxidoreductase yhxC (P40397)|Evalue: 2e-58	858	28563	29 (14)	59.1	259	5.18	FTLEGANVAIACLAQEMKDAEETKRLCEANVETLVREMIKINPESEKEFLDEMTSVRKEGNARVIIVTGDVGSSAECKAMVEKTLAEFGRINILVNNAGEGHDQDDLLHVSEEQMKRTFATNIFSNFYLAKAVLPQMKRGDSIINCASVNPYMGKSKQIDYTATKGAMVSFTRALSTNLADKGIRVNCVAPGPIWTPLIVAENTPSGAKKHGEDEEEWPLGRHGEPCEVAPSFVFLASFDANYITGQTLHPNGGKVVNG	6.3	9.06
	TS14	EZ762756	contig25297:1:781:2|similar to Uncharacterized oxidoreductase yhxC (P40397)|Evalue: 2e-58	529	28563	15 (9)	49.4	259	5.18	FTLEGANVAIACLAQEMKDAEETKRLCEANVETLVREMIKINPESEKEFLDEMTSVRKEGNARVIIVTGDVGSSAECKAMVEKTLAEFGRINILVNNAGEGHDQDDLLHVSEEQMKRTFATNIFSNFYLAKAVLPQMKRGDSIINCASVNPYMGKSKQIDYTATKGAMVSFTRALSTNLADKGIRVNCVAPGPIWTPLIVAENTPSGAKKHGEDEEEWPLGRHGEPCEVAPSFVFLASFDANYITGQTLHPNGGKVVNG	2.02	2.02
	AS13, 14	EZ762617	contig24685:241:1143:1|similar to Uncharacterized oxidoreductase yhxC (P40397)|Evalue: 2e-71	235	32881	5	18.3	300	5.8	MEWKMDVKPVPYSPFYKPASKLNGKIALITGGDSGIGRAVALHYCLEGADVAIACMPDELRDAKETKRLCESDVDTLVREMIKLNPESEADFLEEAKTVKKGRNPRVIIVTGDLRTAAACHDIVHRTTAQLGKIDILVNNAGIAMIYPDFANVTAEKLKETFTVNVFAQFCITQEVIKQMDRGDTIINTASVVAYSGGEHQIDYAASKGAIISFTRSLSANLVQKGIRVNAVAPGAIWTPLIPAAYNSAQEVADFGKDCPMKRPSEPCEVAPAYVFLAAFDSNYITGQTIHVNGGYIVNG	0.62	0.72
	EES12, 11-13	EZ762617	contig24685:241:1143:1|similar to Uncharacterized oxidoreductase yhxC (P40397)|Evalue: 2e-71	493	32881	14 (9)	46.3	300	5.8	MEWKMDVKPVPYSPFYKPASKLNGKIALITGGDSGIGRAVALHYCLEGADVAIACMPDELRDAKETKRLCESDVDTLVREMIKLNPESEADFLEEAKTVKKGRNPRVIIVTGDLRTAAACHDIVHRTTAQLGKIDILVNNAGIAMIYPDFANVTAEKLKETFTVNVFAQFCITQEVIKQMDRGDTIINTASVVAYSGGEHQIDYAASKGAIISFTRSLSANLVQKGIRVNAVAPGAIWTPLIPAAYNSAQEVADFGKDCPMKRPSEPCEVAPAYVFLAAFDSNYITGQTIHVNGGYIVNG	1.62	2.73
	TS13, 14	EZ762617	contig24685:241:1143:1|similar to Uncharacterized oxidoreductase yhxC (P40397)|Evalue: 2e-71	153	32881	4 (3)	12	300	5.8	MEWKMDVKPVPYSPFYKPASKLNGKIALITGGDSGIGRAVALHYCLEGADVAIACMPDELRDAKETKRLCESDVDTLVREMIKLNPESEADFLEEAKTVKKGRNPRVIIVTGDLRTAAACHDIVHRTTAQLGKIDILVNNAGIAMIYPDFANVTAEKLKETFTVNVFAQFCITQEVIKQMDRGDTIINTASVVAYSGGEHQIDYAASKGAIISFTRSLSANLVQKGIRVNAVAPGAIWTPLIPAAYNSAQEVADFGKDCPMKRPSEPCEVAPAYVFLAAFDSNYITGQTIHVNGGYIVNG	0.33	0.66
	AS14	EZ761304	contig18534:1992:2753:1|similar to Uncharacterized oxidoreductase yhxC (P40397)|Evalue: 3e-61	74	28042	2	7.5	253	5.5	EGANVAIACLAEEMKDAEETKRLCEMSMEELVREMIKLNPKAETSFLDELKTARKIGNAQCVIVTGNIGSSEVCRTIVADTIKRFGRINILVNNAAEQQWHDNFEDTTEDEIERTFATNIFSMFYLSKLCIPQMQKGDTIINCTSVNAYRGSPKQITYTATKGAIVAFTRSLALNLADKGIRVNGVAPGPIWTPLLPATMPAESVKTHASKAPMDRHGEPCEVAPSFVFLAAFDSNYITGQVLHPNGGMVVNG	0.25	0.25
	EES13	EZ761304	contig18534:1992:2753:1|similar to Uncharacterized oxidoreductase yhxC (P40397)|Evalue: 3e-61	64	28042	2	7.5	253	5.5	EGANVAIACLAEEMKDAEETKRLCEMSMEELVREMIKLNPKAETSFLDELKTARKIGNAQCVIVTGNIGSSEVCRTIVADTIKRFGRINILVNNAAEQQWHDNFEDTTEDEIERTFATNIFSMFYLSKLCIPQMQKGDTIINCTSVNAYRGSPKQITYTATKGAIVAFTRSLALNLADKGIRVNGVAPGPIWTPLLPATMPAESVKTHASKAPMDRHGEPCEVAPSFVFLAAFDSNYITGQVLHPNGGMVVNG	0.25	0.25
	TS14	EZ761304	contig18534:1992:2753:1|similar to Uncharacterized oxidoreductase yhxC (P40397)|Evalue: 3e-61	72	28042	2	13.8	253	5.5	EGANVAIACLAEEMKDAEETKRLCEMSMEELVREMIKLNPKAETSFLDELKTARKIGNAQCVIVTGNIGSSEVCRTIVADTIKRFGRINILVNNAAEQQWHDNFEDTTEDEIERTFATNIFSMFYLSKLCIPQMQKGDTIINCTSVNAYRGSPKQITYTATKGAIVAFTRSLALNLADKGIRVNGVAPGPIWTPLLPATMPAESVKTHASKAPMDRHGEPCEVAPSFVFLAAFDSNYITGQVLHPNGGMVVNG	0.25	0.25
	AS14, 13-15	EZ758967	contig00386:1:827:3|similar to Uncharacterized oxidoreductase yhdF (O07575)|Evalue: 1e-74	232	29972	7 (6)	34.3	274	5.83	ALITGGDSGIGRSVAIHYCLEGADVAIACLEEEMDDAKETKRLCEADVDTLVKEMIKINPESEQDFMEEKKTVKKYGKSRVIILRGDIGDQQIAQHHIDETVKQLGKLNILVNNAAEQHPQDDFTNISKDQLQKTFATNIFSMFYLAQTAVKHMNRSDVIINTASITAYYGSKGLVDYSATKGAIISFTRSLSGNLVGKGIRVNAVAPGPIWTPLIPASYPTKEKVAAHGADVPMKRPGETCELGPAYVFLASFDSNYITGQTIHVNGGTIING	0.88	1.63
	TS14, 13	EZ758967	contig00386:1:827:3|similar to Uncharacterized oxidoreductase yhdF (O07575)|Evalue: 1e-74	325	29972	8	41.2	274	5.83	ALITGGDSGIGRSVAIHYCLEGADVAIACLEEEMDDAKETKRLCEADVDTLVKEMIKINPESEQDFMEEKKTVKKYGKSRVIILRGDIGDQQIAQHHIDETVKQLGKLNILVNNAAEQHPQDDFTNISKDQLQKTFATNIFSMFYLAQTAVKHMNRSDVIINTASITAYYGSKGLVDYSATKGAIISFTRSLSGNLVGKGIRVNAVAPGPIWTPLIPASYPTKEKVAAHGADVPMKRPGETCELGPAYVFLASFDSNYITGQTIHVNGGTIING	1.32	1.55
	AS14, 13	EZ761825	contig21076:1:608:3|similar to Uncharacterized oxidoreductase yhdF (O07575)|Evalue: 6e-58	73	22041	1	5.5	201	9.82	KKMRQSRAIIVTGDIGTKAVCDRIVQDTISQLGKIDILVNNAAEQYPQKDFLNITDEQLRKTFATNIFAMFYLSQAVLKQMDRGGVIINSASVTAYRGSAXRGRLRFDQGAIISFTRSLATKLVEKGIRVNAVAPGPIWTPLIPGSYRTLEKVNSHGKGAPMKRPGEPCETAPSYVFLAAFDSNYITGQVLHPNGGAIINT	0.15	0.3
	EES12, 11-13	EZ761825	contig21076:1:608:3|similar to Uncharacterized oxidoreductase yhdF (O07575)|Evalue: 6e-58	253	22041	6 (4)	29.4	201	9.82	KKMRQSRAIIVTGDIGTKAVCDRIVQDTISQLGKIDILVNNAAEQYPQKDFLNITDEQLRKTFATNIFAMFYLSQAVLKQMDRGGVIINSASVTAYRGSAXRGRLRFDQGAIISFTRSLATKLVEKGIRVNAVAPGPIWTPLIPGSYRTLEKVNSHGKGAPMKRPGEPCETAPSYVFLAAFDSNYITGQVLHPNGGAIINT	1.03	1.71
	AS13, 12-16	EZ761783	contig20766:1:786:1|similar to Uncharacterized oxidoreductase yhdF (O07575)|Evalue: 1e-49	523	27880	11 (8)	39.5	261	6.92	NCSTLLLEGANVAIACLEEEMKDAQETKRLCELPMDALIAEMSKINPESAADFTAEAATAKKFGKSRAIIVTGDLAKPETAGKLIQDATRQLGKINILVNNAGVQYQVDDITNVSVAQIQKTFAINIQSQIYLAQAVVKQMVKGDTVINTASRGAYVGSKTSVDYSATKGAIISFTRSLSLNLAGKGIRVNAVSPGPVWTPLDASTYQTREKIQAHGKDTPMGRPAEPCEIAPAYVFLASFDANYVSGTTVHVNGGQITGS	1.47	3.85
	EES13, 12	EZ761783	contig20766:1:786:1|similar to Uncharacterized oxidoreductase yhdF (O07575)|Evalue: 1e-49	339	27880	7 (5)	29.5	261	6.92	NCSTLLLEGANVAIACLEEEMKDAQETKRLCELPMDALIAEMSKINPESAADFTAEAATAKKFGKSRAIIVTGDLAKPETAGKLIQDATRQLGKINILVNNAGVQYQVDDITNVSVAQIQKTFAINIQSQIYLAQAVVKQMVKGDTVINTASRGAYVGSKTSVDYSATKGAIISFTRSLSLNLAGKGIRVNAVSPGPVWTPLDASTYQTREKIQAHGKDTPMGRPAEPCEIAPAYVFLASFDANYVSGTTVHVNGGQITGS	0.97	1.22
	TS14, 13-15	EZ761783	contig20766:1:786:1|similar to Uncharacterized oxidoreductase yhdF (O07575)|Evalue: 1e-49	600	27880	20 (9)	42.9	261	6.92	NCSTLLLEGANVAIACLEEEMKDAQETKRLCELPMDALIAEMSKINPESAADFTAEAATAKKFGKSRAIIVTGDLAKPETAGKLIQDATRQLGKINILVNNAGVQYQVDDITNVSVAQIQKTFAINIQSQIYLAQAVVKQMVKGDTVINTASRGAYVGSKTSVDYSATKGAIISFTRSLSLNLAGKGIRVNAVSPGPVWTPLDASTYQTREKIQAHGKDTPMGRPAEPCEIAPAYVFLASFDANYVSGTTVHVNGGQITGS	2.88	3.76
	AS13, 14	EZ760403	contig09201:123:466:3|similar to Uncharacterized oxidoreductase yhdF (O07575)|Evalue: 9e-18	84	12964	2	19.3	114	4.95	MENRTHFAEVQDKQPGLEWKMQTLPLPYCPFYKPAGKLNGKVALITGGDSGIGRAVALHFCLEGADVAIACLAEEMKDAEETKRLCESDVETLVREMIKINPESEQEFLKEMKS	0.6	1.2
	EES12,11-13	EZ760403	contig09201:123:466:3|similar to Uncharacterized oxidoreductase yhdF (O07575)|Evalue: 9e-18	259	12964	7 (4)	38.6	114	4.95	MENRTHFAEVQDKQPGLEWKMQTLPLPYCPFYKPAGKLNGKVALITGGDSGIGRAVALHFCLEGADVAIACLAEEMKDAEETKRLCESDVETLVREMIKINPESEQEFLKEMKS	1.55	2.83
	TS14, 13	EZ760403	contig09201:123:466:3|similar to Uncharacterized oxidoreductase yhdF (O07575)|Evalue: 9e-18	167	12964	4 (3)	28.9	114	4.95	MENRTHFAEVQDKQPGLEWKMQTLPLPYCPFYKPAGKLNGKVALITGGDSGIGRAVALHFCLEGADVAIACLAEEMKDAEETKRLCESDVETLVREMIKINPESEQEFLKEMKS	1.02	1.62
	AS14, 15	EZ759962	contig05892:363:620:3|similar to Uncharacterized oxidoreductase yhdF (O07575)|Evalue: 2e-10	164	9137	3 (2)	32.6	86	9.05	MEKITQFVQSLTSDSTGTTDAASAMENRKHGGEQQSSEPGLEYKMGLKPLPYNPLYKSSGKLRGKTALITGGDSGIGRAIAIHFAL	0.91	1.29
	EES14, 11, 20	EZ759962	contig05892:363:620:3|similar to Uncharacterized oxidoreductase yhdF (O07575)|Evalue: 2e-10	41	9137	1	15.1	86	9.05	MEKITQFVQSLTSDSTGTTDAASAMENRKHGGEQQSSEPGLEYKMGLKPLPYNPLYKSSGKLRGKTALITGGDSGIGRAIAIHFAL	0.38	1.14
	TS14, 12, 16	EZ759962	contig05892:363:620:3|similar to Uncharacterized oxidoreductase yhdF (O07575)|Evalue: 2e-10	112	9137	4 (2)	44.2	86	9.05	MEKITQFVQSLTSDSTGTTDAASAMENRKHGGEQQSSEPGLEYKMGLKPLPYNPLYKSSGKLRGKTALITGGDSGIGRAIAIHFAL	0.91	1.67
	EES15	EZ760078	contig06705:145:450:1|similar to Uncharacterized oxidoreductase TM_0325 (Q9WYG0)|Evalue: 3e-08	96	10640	3 (2)	37.3	102	4.84	MLSQKVALITGASSGIGAATAVLFAKLGAKLSITGRNLDNLKSTADQCKEASSDAEPLMIQAELTKEADVEQLVKKTIEHFGGIDILINNAGTLETGSIETT	1.32	1.32
	TS16, 17	EZ760078	contig06705:145:450:1|similar to Uncharacterized oxidoreductase TM_0325 (Q9WYG0)|Evalue: 3e-08	43	10640	1	16.7	102	4.84	MLSQKVALITGASSGIGAATAVLFAKLGAKLSITGRNLDNLKSTADQCKEASSDAEPLMIQAELTKEADVEQLVKKTIEHFGGIDILINNAGTLETGSIETT	0.32	0.64
	AS15, 14-16	EZ758922	contig00126:38:435:2|similar to Probable oxidoreductase ephD (P66778)|Evalue: 9e-11	37	14350	1	7.6	132	9.26	MYAVSQCTVAAIVTTGLLLSVTCLISAIKREYKVTAPDGVRIAVQESGNPKGNPIIFVHGALGSHLNWEKQTNSTTLQNYRLITYDLRGHGLSGKPTDAASYSDGRRWADDLQTVIRSTNATKPVLVGWSLG	0.24	0.72
aldo/keto reductase family	AS15, 16	EZ762149	contig22965:1:959:3|similar to Uncharacterized oxidoreductase ZK1290.5 (Q09632)|Evalue: 1e-65	158	36261	5 (3)	17.3	318	6.6	CELLLRXDTSAQTISRGIQRYDHQQNMEYFTLSNGLKIPKLGLGTSSAGGYSHTAAVHALKNCGYRLIDTASKYGTEKRLAIAIKESGVLREDLFIISKVWPTDYGAEKTIASFRASLQRLDTSYLDLFLIHWPVVAEGAHKKEVLLETWRTLELLYDKGDARAIGVSNFEPNEIQELIDECSVTPHVEQSEFHIRQHQPTLRQYCKQNGIQFQGFSPLGRKKGNFFEIPEVTEMSRRYSKTPAQILLRWCVQSDVVTIPKSTNEGRLRENISIFDFSLNQEDMSALSKLHTNMVTADRAMVQKGFAEEMAAVNHDAV	0.3	0.6
	EES14, 1	EZ762149	contig22965:1:959:3|similar to Uncharacterized oxidoreductase ZK1290.5 (Q09632)|Evalue: 1e-65	81	36261	2	14.8	318	6.6	CELLLRXDTSAQTISRGIQRYDHQQNMEYFTLSNGLKIPKLGLGTSSAGGYSHTAAVHALKNCGYRLIDTASKYGTEKRLAIAIKESGVLREDLFIISKVWPTDYGAEKTIASFRASLQRLDTSYLDLFLIHWPVVAEGAHKKEVLLETWRTLELLYDKGDARAIGVSNFEPNEIQELIDECSVTPHVEQSEFHIRQHQPTLRQYCKQNGIQFQGFSPLGRKKGNFFEIPEVTEMSRRYSKTPAQILLRWCVQSDVVTIPKSTNEGRLRENISIFDFSLNQEDMSALSKLHTNMVTADRAMVQKGFAEEMAAVNHDAV	0.19	0.28
	TS15, 16	EZ762149	contig22965:1:959:3|similar to Uncharacterized oxidoreductase ZK1290.5 (Q09632)|Evalue: 1e-65	142	36261	4 (2)	6.9	318	6.6	CELLLRXDTSAQTISRGIQRYDHQQNMEYFTLSNGLKIPKLGLGTSSAGGYSHTAAVHALKNCGYRLIDTASKYGTEKRLAIAIKESGVLREDLFIISKVWPTDYGAEKTIASFRASLQRLDTSYLDLFLIHWPVVAEGAHKKEVLLETWRTLELLYDKGDARAIGVSNFEPNEIQELIDECSVTPHVEQSEFHIRQHQPTLRQYCKQNGIQFQGFSPLGRKKGNFFEIPEVTEMSRRYSKTPAQILLRWCVQSDVVTIPKSTNEGRLRENISIFDFSLNQEDMSALSKLHTNMVTADRAMVQKGFAEEMAAVNHDAV	0.19	0.28
complex I 75 kDa subunit family	AS8, 9	EZ760680	contig11701:1:1448:1|similar to NADH-ubiquinone oxidoreductase 75 kDa subunit, mitochondrial (P15690)|Evalue: 9e-169	678	53426	12 (11)	36.1	482	5.64	TYVEKLLASELSGNVIDLCPVGALTSKPYAFTARPWELRRYESIDVMDALGSNIVVNFRAGTNGGEIMRILPRVHDGINEEWISDKTRFSYDAXXRRQRLVLPMIKNSEGLLEETDWETALMTVGQRMSKTRGEEMAALVGGFAAAEELTALKDLMNRIGCETLCTEESFPMDASATDLRSSYLLNSKITGVEEADLVIFVGCNPRFEASVLNARVRKCYLHNNLRIALLGHPVDLTYDYDHIGVGLNDLEALANGQHKYQEILEKAKKPMVIVGSTALQSENGAQILASAMLLSTKLRSKVEGDSWRVLNVLHRVANQVAALDIGYKAGVAEIKQLKPKLLYLLNADEGFITRDDLSPNATVIYEGHHGDRGAQMADIVLPGAAYTEKCGTYVNTEGR…	0.93	1.36
	EES8	EZ760680	contig11701:1:1448:1|similar to NADH-ubiquinone oxidoreductase 75 kDa subunit, mitochondrial (P15690)|Evalue: 9e-169	224	53426	3	8.3	482	5.64	TYVEKLLASELSGNVIDLCPVGALTSKPYAFTARPWELRRYESIDVMDALGSNIVVNFRAGTNGGEIMRILPRVHDGINEEWISDKTRFSYDAXXRRQRLVLPMIKNSEGLLEETDWETALMTVGQRMSKTRGEEMAALVGGFAAAEELTALKDLMNRIGCETLCTEESFPMDASATDLRSSYLLNSKITGVEEADLVIFVGCNPRFEASVLNARVRKCYLHNNLRIALLGHPVDLTYDYDHIGVGLNDLEALANGQHKYQEILEKAKKPMVIVGSTALQSENGAQILASAMLLSTKLRSKVEGDSWRVLNVLHRVANQVAALDIGYKAGVAEIKQLKPKLLYLLNADEGFITRDDLSPNATVIYEGHHGDRGAQMADIVLPGAAYTEKCGTYVNTEGR…	0.2	0.2
	TS9, 8, 12	EZ760680	contig11701:1:1448:1|similar to NADH-ubiquinone oxidoreductase 75 kDa subunit, mitochondrial (P15690)|Evalue: 9e-169	458	53426	13 (9)	26.6	482	5.64	TYVEKLLASELSGNVIDLCPVGALTSKPYAFTARPWELRRYESIDVMDALGSNIVVNFRAGTNGGEIMRILPRVHDGINEEWISDKTRFSYDAXXRRQRLVLPMIKNSEGLLEETDWETALMTVGQRMSKTRGEEMAALVGGFAAAEELTALKDLMNRIGCETLCTEESFPMDASATDLRSSYLLNSKITGVEEADLVIFVGCNPRFEASVLNARVRKCYLHNNLRIALLGHPVDLTYDYDHIGVGLNDLEALANGQHKYQEILEKAKKPMVIVGSTALQSENGAQILASAMLLSTKLRSKVEGDSWRVLNVLHRVANQVAALDIGYKAGVAEIKQLKPKLLYLLNADEGFITRDDLSPNATVIYEGHHGDRGAQMADIVLPGAAYTEKCGTYVNTEGR…	0.82	1.17
	AS8	EZ761899	contig21597:124:783:1|similar to NADH-ubiquinone oxidoreductase 75 kDa subunit, mitochondrial (Q94511)|Evalue: 4e-96	103	24465	4 (3)	11.8	220	8.04	MLRPQQLQTLLRSAPLSHGAARTLSTSVALTQTPATADTKVEVFIDDKRVLVEAGTTVLQAAAVAGVEIPRFCYHERLSIAGNCRMCLVEVEKSVKPVASCAMPVMKGMKVKTNSAFARKAREGVMEFLLVNHPLDCPICDQGGECDLQDQSMMFGSDRSRFTDIQFDGKRAVEDKNIGPLVKTIMTRCIHCTRCIRFASEVAGVDDLGTTGRGSDMQVG	0.67	0.67
	TS9, 8	EZ761899	contig21597:124:783:1|similar to NADH-ubiquinone oxidoreductase 75 kDa subunit, mitochondrial (Q94511)|Evalue: 4e-96	79	24465	3 (2)	10.5	220	8.04	MLRPQQLQTLLRSAPLSHGAARTLSTSVALTQTPATADTKVEVFIDDKRVLVEAGTTVLQAAAVAGVEIPRFCYHERLSIAGNCRMCLVEVEKSVKPVASCAMPVMKGMKVKTNSAFARKAREGVMEFLLVNHPLDCPICDQGGECDLQDQSMMFGSDRSRFTDIQFDGKRAVEDKNIGPLVKTIMTRCIHCTRCIRFASEVAGVDDLGTTGRGSDMQVG	0.47	0.61
complex I 51 kDa subunit family.	AS11, 10	EZ760467	contig09616:1:1244:3|similar to NADH dehydrogenase [ubiquinone] flavoprotein 1, mitochondrial (Q91YT0)|Evalue: 0.0	228	45980	5	16.5	413	6.18	EWILNEVKKSGLRGRGGAGFPSGMKWSFMNKPDDGRPKYLVVNADEGEPGTCKDREIMRHDPHKLIEGCLIAGRAMHAVAAYIYIRGEFYNEAVNLQIAVNEAYRAGFIGKNACDTGYDFDVYVFRGAGAYICGEETALIESLEGKQGKPRLKPPFPADIGLFGCPTTVANVETVAVAPAICRRKGEWFASFGRERNHGTKLFCISGHVNNPVTVEEEMSIPLKELIERHAGGVKGGWDNLLGIIPGGSSVPVLPKSTCETVLMDFDALQAVQSGLGTAAIIVMNKESDMIRNIARLLEFYKHESCGQCTPCREGVGWLNTIMARFTEGNAQPAEIDMIWELSKQIEGHTICALGDAAAWPVQGLIRHFRPLMEQRMKEFAAKKKSTHEGSTPEQQKSK…	0.41	0.48
	EES10	EZ760467	contig09616:1:1244:3|similar to NADH dehydrogenase [ubiquinone] flavoprotein 1, mitochondrial (Q91YT0)|Evalue: 0.0	164	45980	2	8.5	413	6.18	EWILNEVKKSGLRGRGGAGFPSGMKWSFMNKPDDGRPKYLVVNADEGEPGTCKDREIMRHDPHKLIEGCLIAGRAMHAVAAYIYIRGEFYNEAVNLQIAVNEAYRAGFIGKNACDTGYDFDVYVFRGAGAYICGEETALIESLEGKQGKPRLKPPFPADIGLFGCPTTVANVETVAVAPAICRRKGEWFASFGRERNHGTKLFCISGHVNNPVTVEEEMSIPLKELIERHAGGVKGGWDNLLGIIPGGSSVPVLPKSTCETVLMDFDALQAVQSGLGTAAIIVMNKESDMIRNIARLLEFYKHESCGQCTPCREGVGWLNTIMARFTEGNAQPAEIDMIWELSKQIEGHTICALGDAAAWPVQGLIRHFRPLMEQRMKEFAAKKKSTHEGSTPEQQKSK…	0.15	0.15
	TS11	EZ760467	contig09616:1:1244:3|similar to NADH dehydrogenase [ubiquinone] flavoprotein 1, mitochondrial (Q91YT0)|Evalue: 0.0	282	45980	6	26.4	413	6.18	EWILNEVKKSGLRGRGGAGFPSGMKWSFMNKPDDGRPKYLVVNADEGEPGTCKDREIMRHDPHKLIEGCLIAGRAMHAVAAYIYIRGEFYNEAVNLQIAVNEAYRAGFIGKNACDTGYDFDVYVFRGAGAYICGEETALIESLEGKQGKPRLKPPFPADIGLFGCPTTVANVETVAVAPAICRRKGEWFASFGRERNHGTKLFCISGHVNNPVTVEEEMSIPLKELIERHAGGVKGGWDNLLGIIPGGSSVPVLPKSTCETVLMDFDALQAVQSGLGTAAIIVMNKESDMIRNIARLLEFYKHESCGQCTPCREGVGWLNTIMARFTEGNAQPAEIDMIWELSKQIEGHTICALGDAAAWPVQGLIRHFRPLMEQRMKEFAAKKKSTHEGSTPEQQKSK…	0.52	0.52
	AS18	EZ761916	contig21698:72:454:3|similar to NADH dehydrogenase [ubiquinone] flavoprotein 2, mitochondrial (Q0MQI8)|Evalue: 2e-37	145	14518	4 (3)	30.7	127	9.69	MAAIKWANILSRVSLYGKVQAQRNISRSAALSSDKLFIHRDDSENNLDVPFDFTPENRARIDAITAMFPEGHKRAALIPVLDLAQRQHGWLPITAMHKVAEILDMPRMRVYEVATFYTMFNRNPMGK	0.88	0.88
	TS18	EZ761916	contig21698:72:454:3|similar to NADH dehydrogenase [ubiquinone] flavoprotein 2, mitochondrial (Q0MQI8)|Evalue: 2e-37	198	14518	3	33.9	127	9.69	MAAIKWANILSRVSLYGKVQAQRNISRSAALSSDKLFIHRDDSENNLDVPFDFTPENRARIDAITAMFPEGHKRAALIPVLDLAQRQHGWLPITAMHKVAEILDMPRMRVYEVATFYTMFNRNPMGK	0.88	0.88
	AS18	EZ759456	contig02969:1:262:2|similar to NADH dehydrogenase [ubiquinone] flavoprotein 2, mitochondrial (P19234)|Evalue: 4e-22	75	9601	2	43	86	4.52	TKDKLFTLSEVECLGACVNAPMIQVNDDFYEDLSEKDTIEILNELAAGRRPKPGPRNGRTCSEPLTGLTSLTEAPKPPEFGVRDDL	0.86	0.86
FAD-dependent oxidoreductase 2 family. FRD/SDH subfamily.	AS9, 9-12, 14-16	EZ759447	contig02931:68:2026:2|similar to Probable succinate dehydrogenase [ubiquinone] flavoprotein subunit, mitochondrial (Q9UTJ7)|Evalue: 0.0	1152	72613	27 (18)	37.4	652	7.09	MISSLKGSASKFAKSLCANSKQHLFSAKGVRAASSSQQISSEYPIIDHTYDAVVVGAGGAGLRAAFGLSELGFNVACVSKLFPTRSHTVAAQGGVNAALGNMEPDDWRWHMYDTVKGSDWLGDQDAIHYMTREAPEAVIELENYGMPFSRTKEGKIYQRAFGGQSYKYGKGGQAHRCCCVADRTGHSLLHTLYGRSLKYDCKYFVEYFALDLLMENGECRGIIALCMEDGTIHRFRAKNTVIATGGYGRTYFSCTSAHTCTGDGNAMVTRAGLPNQDLEFVQFHPTGIYGAGCLITEGCRGEGGYLLNSEGERFMERYAPVAKDLASRDVVSRAMTIEIREGRGCGPEKDHVYLQLSHLPPEQLATRLPGISETAMIFAGVDVTKEPIPVLPTVHYNMG…	1.77	2.51
	EES9, 8	EZ759447	contig02931:68:2026:2|similar to Probable succinate dehydrogenase [ubiquinone] flavoprotein subunit, mitochondrial (Q9UTJ7)|Evalue: 0.0	433	72613	8	16.9	652	7.09	MISSLKGSASKFAKSLCANSKQHLFSAKGVRAASSSQQISSEYPIIDHTYDAVVVGAGGAGLRAAFGLSELGFNVACVSKLFPTRSHTVAAQGGVNAALGNMEPDDWRWHMYDTVKGSDWLGDQDAIHYMTREAPEAVIELENYGMPFSRTKEGKIYQRAFGGQSYKYGKGGQAHRCCCVADRTGHSLLHTLYGRSLKYDCKYFVEYFALDLLMENGECRGIIALCMEDGTIHRFRAKNTVIATGGYGRTYFSCTSAHTCTGDGNAMVTRAGLPNQDLEFVQFHPTGIYGAGCLITEGCRGEGGYLLNSEGERFMERYAPVAKDLASRDVVSRAMTIEIREGRGCGPEKDHVYLQLSHLPPEQLATRLPGISETAMIFAGVDVTKEPIPVLPTVHYNMG…	0.42	0.61
	TS9, 9-12	EZ759447	contig02931:68:2026:2|similar to Probable succinate dehydrogenase [ubiquinone] flavoprotein subunit, mitochondrial (Q9UTJ7)|Evalue: 0.0	993	72613	23 (17)	35.4	652	7.09	MISSLKGSASKFAKSLCANSKQHLFSAKGVRAASSSQQISSEYPIIDHTYDAVVVGAGGAGLRAAFGLSELGFNVACVSKLFPTRSHTVAAQGGVNAALGNMEPDDWRWHMYDTVKGSDWLGDQDAIHYMTREAPEAVIELENYGMPFSRTKEGKIYQRAFGGQSYKYGKGGQAHRCCCVADRTGHSLLHTLYGRSLKYDCKYFVEYFALDLLMENGECRGIIALCMEDGTIHRFRAKNTVIATGGYGRTYFSCTSAHTCTGDGNAMVTRAGLPNQDLEFVQFHPTGIYGAGCLITEGCRGEGGYLLNSEGERFMERYAPVAKDLASRDVVSRAMTIEIREGRGCGPEKDHVYLQLSHLPPEQLATRLPGISETAMIFAGVDVTKEPIPVLPTVHYNMG…	1.12	1.64
ETF alpha-subunit/fixB family.	AS15, 15-19	EZ761740	contig20530:1:997:2|similar to Electron transfer flavoprotein subunit alpha, mitochondrial (Q8HXY0)|Evalue: 3e-107	867	34752	20 (13)	53.8	331	8.64	RATVRSFQGALHRCQSTLVLAEHNNEKLASITLNTVTAAQRIGGDITCIVLGTNCGKVAEEASKIAGVTRLLVADDPSLAGFLAERVAPTIAAAQKQFNFSHIIGGATAYGKGIMPRVAALLDVQPVSDVVAFKGADTFVRPIYAGNAILTVKSLDKVKVITVRGTAFEAAAAGGSAKVEKAAIGEFDKSSSEFVEQRITKSDRPELSAAKAVISGGRGMKNGENFKMLYDLADRLGAAVGASRAAVDAGFVPNDLQVGQTGKIVAPELYIAVGISGAIQHLAGMKDSKTIVAINKDPEAPIFQVADVGLVEDLFKAVPEMIKLVDESKKQ	2.93	3.64
	EES14	EZ761740	contig20530:1:997:2|similar to Electron transfer flavoprotein subunit alpha, mitochondrial (Q8HXY0)|Evalue: 3e-107	856	34752	20 (13)	53.8	331	8.64	RATVRSFQGALHRCQSTLVLAEHNNEKLASITLNTVTAAQRIGGDITCIVLGTNCGKVAEEASKIAGVTRLLVADDPSLAGFLAERVAPTIAAAQKQFNFSHIIGGATAYGKGIMPRVAALLDVQPVSDVVAFKGADTFVRPIYAGNAILTVKSLDKVKVITVRGTAFEAAAAGGSAKVEKAAIGEFDKSSSEFVEQRITKSDRPELSAAKAVISGGRGMKNGENFKMLYDLADRLGAAVGASRAAVDAGFVPNDLQVGQTGKIVAPELYIAVGISGAIQHLAGMKDSKTIVAINKDPEAPIFQVADVGLVEDLFKAVPEMIKLVDESKKQ	2.93	2.93
	TS15, 14, 19	EZ761740	contig20530:1:997:2|similar to Electron transfer flavoprotein subunit alpha, mitochondrial (Q8HXY0)|Evalue: 3e-107	955	34752	26 (14)	56.2	331	8.64	RATVRSFQGALHRCQSTLVLAEHNNEKLASITLNTVTAAQRIGGDITCIVLGTNCGKVAEEASKIAGVTRLLVADDPSLAGFLAERVAPTIAAAQKQFNFSHIIGGATAYGKGIMPRVAALLDVQPVSDVVAFKGADTFVRPIYAGNAILTVKSLDKVKVITVRGTAFEAAAAGGSAKVEKAAIGEFDKSSSEFVEQRITKSDRPELSAAKAVISGGRGMKNGENFKMLYDLADRLGAAVGASRAAVDAGFVPNDLQVGQTGKIVAPELYIAVGISGAIQHLAGMKDSKTIVAINKDPEAPIFQVADVGLVEDLFKAVPEMIKLVDESKKQ	3.3	3.5
	AS16, 16-19	EZ761199	contig17994:1:644:2|similar to Electron transfer flavoprotein subunit beta (P38117)|Evalue: 8e-67	428	23586	11 (9)	59.8	214	5.84	TGIETVLLNFASDLCSSGFCGSVVRCICLCVFLLQIPVRMSLRVMVGVKRVVDYAVKVRVKSDKTGVATEGVKHSMNPFDEIAVEEAVRLREKKAVGEIIAVSCGPTQSQETLRTALAMGADRAIHIEVEPSDFQNVTPLHVSKMFARLAKDEKIDLVILGKQAIDDDCNQTGQMTAALLNWPQAIFASKVEAADGHLRVDREVDGGSETVRAS	2.78	3.92
	EES15, 14	EZ761199	contig17994:1:644:2|similar to Electron transfer flavoprotein subunit beta (P38117)|Evalue: 8e-67	378	23586	9 (6)	39.7	214	5.84	TGIETVLLNFASDLCSSGFCGSVVRCICLCVFLLQIPVRMSLRVMVGVKRVVDYAVKVRVKSDKTGVATEGVKHSMNPFDEIAVEEAVRLREKKAVGEIIAVSCGPTQSQETLRTALAMGADRAIHIEVEPSDFQNVTPLHVSKMFARLAKDEKIDLVILGKQAIDDDCNQTGQMTAALLNWPQAIFASKVEAADGHLRVDREVDGGSETVRAS	1.22	1.36
	TS16, 15-17	EZ761199	contig17994:1:644:2|similar to Electron transfer flavoprotein subunit beta (P38117)|Evalue: 8e-67	469	23586	13 (8)	53.3	214	5.84	TGIETVLLNFASDLCSSGFCGSVVRCICLCVFLLQIPVRMSLRVMVGVKRVVDYAVKVRVKSDKTGVATEGVKHSMNPFDEIAVEEAVRLREKKAVGEIIAVSCGPTQSQETLRTALAMGADRAIHIEVEPSDFQNVTPLHVSKMFARLAKDEKIDLVILGKQAIDDDCNQTGQMTAALLNWPQAIFASKVEAADGHLRVDREVDGGSETVRAS	2.78	3.06
intradiol ring-cleavage dioxygenase family.	AS18, 16-19	EZ763036	contig26540:1:668:3|similar to Chlorocatechol 1,2-dioxygenase (P27098)|Evalue: 7e-14	185	24612	5 (3)	19	221	8.45	SAVLLLVCLIGFAAAQKSPKTYRYEQRPAPIRLQTRDLLQSACYATQPDILGPYYVAGAPFRANGYVCNALPAHDRLILNGTVRVVSSGNTCGTPTRALLDIWHANTDGAYSVGASDNFFCRSKVMTGPNGEFSLTTIMPGRYDDGGYRPAHIHFKITQVNSQGQMVGPTLTTQLYFNGDYYLGDNDSCARCNSRDVTLLSLLTHKSDIKTYEGTWSVLLQ	0.46	0.88
	EES16	EZ763036	contig26540:1:668:3|similar to Chlorocatechol 1,2-dioxygenase (P27098)|Evalue: 7e-14	79	24612	2	10.9	221	8.45	SAVLLLVCLIGFAAAQKSPKTYRYEQRPAPIRLQTRDLLQSACYATQPDILGPYYVAGAPFRANGYVCNALPAHDRLILNGTVRVVSSGNTCGTPTRALLDIWHANTDGAYSVGASDNFFCRSKVMTGPNGEFSLTTIMPGRYDDGGYRPAHIHFKITQVNSQGQMVGPTLTTQLYFNGDYYLGDNDSCARCNSRDVTLLSLLTHKSDIKTYEGTWSVLLQ	0.29	0.29
	TS18, 16-19	EZ763036	contig26540:1:668:3|similar to Chlorocatechol 1,2-dioxygenase (P27098)|Evalue: 7e-14	142	24612	3 (2)	10.9	221	8.45	SAVLLLVCLIGFAAAQKSPKTYRYEQRPAPIRLQTRDLLQSACYATQPDILGPYYVAGAPFRANGYVCNALPAHDRLILNGTVRVVSSGNTCGTPTRALLDIWHANTDGAYSVGASDNFFCRSKVMTGPNGEFSLTTIMPGRYDDGGYRPAHIHFKITQVNSQGQMVGPTLTTQLYFNGDYYLGDNDSCARCNSRDVTLLSLLTHKSDIKTYEGTWSVLLQ	0.29	1.01
aldo/keto reductase family.	TS18, 17	EZ760318	contig08420:165:1178:3|similar to Prostaglandin F synthase 1 (P05980)|Evalue: 2e-58	48	39054	1	2.1	337	5.27	MLIPQSEGSQSTVPYVRLNDGRKMPVMALGTMVGYTVESQLIMERAIKEAIDMGYRAFDTAFLYKNEXXLWGERSEEKIDDGTVRREDIFVITKLPPQFMSPKMVSAALQKSLDNLNLGYIDLYSLHLPVYIKDFDEEEWIRRDLNDPVPVSEVDHFGIWREMEKAVESGLVKSIGLSNFNRRQIYNLLQFCKIKPSNVQVECHVYLQQNAVVELCQKNEISVSAYGIFGSPEFFPEPKLNGKPLTRILEHPLIQSIASKHSKSTAQIVLRWAFERGICIVAKSSIQEQLQENLRFFDFCLTSEDMQQIKTLDIGARVYIEYMKGYSHAPEYPFDED	0.08	0.16
catalase family. HPII subfamily	AS5, 3-9	EZ759139	contig01298:1:2065:3|similar to Catalase HPII (P21179)|Evalue: 0.0	1706	76798	67 (29)	55	687	5.98	AGSAMADLVMSDAKSQDLQKVTIEDPQKGNYITSTFGLRINHTDDSLKAGPRGPTLLEDFWFRERTTHFDHERIPERVVHARGSGAHGYFQLYESLEQYTKASFLCNTSKKTPVFTRFSTVLGSRGSADTARDVRGFAVKFYTDEGNFDLVGNNIPVFFVQDAIKFQDIIHAGKPEPDNEIPQASTAHDNLWDFMSLLPETTHMMMWATSDRFIPRSYRMMEGFGVHSFILSNKDGKRVFAKFHWKPLLGVHSLVWDEAHKLMGIDPDFHRRDLWEAIEAGAYPEYELGLQIVAEEDEHKFPFDLLDSTKIIPEELVPVMRVGKLVLNRNPDNFFAETEQVAYHMGHLVPGIEASNDPLLQGRLFSYVDTQLTRLGGPNFNQIPINRPIVEVTNHMRDG…	5.3	13.23
	EES7, 4-8	EZ759139	contig01298:1:2065:3|similar to Catalase HPII (P21179)|Evalue: 0.0	1812	76798	87 (30)	54.9	687	5.98	AGSAMADLVMSDAKSQDLQKVTIEDPQKGNYITSTFGLRINHTDDSLKAGPRGPTLLEDFWFRERTTHFDHERIPERVVHARGSGAHGYFQLYESLEQYTKASFLCNTSKKTPVFTRFSTVLGSRGSADTARDVRGFAVKFYTDEGNFDLVGNNIPVFFVQDAIKFQDIIHAGKPEPDNEIPQASTAHDNLWDFMSLLPETTHMMMWATSDRFIPRSYRMMEGFGVHSFILSNKDGKRVFAKFHWKPLLGVHSLVWDEAHKLMGIDPDFHRRDLWEAIEAGAYPEYELGLQIVAEEDEHKFPFDLLDSTKIIPEELVPVMRVGKLVLNRNPDNFFAETEQVAYHMGHLVPGIEASNDPLLQGRLFSYVDTQLTRLGGPNFNQIPINRPIVEVTNHMRDG…	5.85	7.24
	TS8, 4-9	EZ759139	contig01298:1:2065:3|similar to Catalase HPII (P21179)|Evalue: 0.0	1696	76798	71 (27)	52.3	687	5.98	AGSAMADLVMSDAKSQDLQKVTIEDPQKGNYITSTFGLRINHTDDSLKAGPRGPTLLEDFWFRERTTHFDHERIPERVVHARGSGAHGYFQLYESLEQYTKASFLCNTSKKTPVFTRFSTVLGSRGSADTARDVRGFAVKFYTDEGNFDLVGNNIPVFFVQDAIKFQDIIHAGKPEPDNEIPQASTAHDNLWDFMSLLPETTHMMMWATSDRFIPRSYRMMEGFGVHSFILSNKDGKRVFAKFHWKPLLGVHSLVWDEAHKLMGIDPDFHRRDLWEAIEAGAYPEYELGLQIVAEEDEHKFPFDLLDSTKIIPEELVPVMRVGKLVLNRNPDNFFAETEQVAYHMGHLVPGIEASNDPLLQGRLFSYVDTQLTRLGGPNFNQIPINRPIVEVTNHMRDG…	4.33	11.24
globin family. Two-domain flavohemoproteins subfamily.	AS18, 16-18	EZ761847	contig21229:1:290:3|similar to Flavohemoprotein (Q8ETH0)|Evalue: 7e-04	167	10941	2	31.6	95	6.78	ISVLILQKIGRDHVKRGLQMKQFDDLTEVMVDLLKGLMGPAFTDQVLNAWRKALVVVMDVVYKQMYQTEQEQLQTLGYTTNDDNSKMQQMVNNAK	0.73	1.77
detoxofication	EES16	EZ761847	contig21229:1:290:3|similar to Flavohemoprotein (Q8ETH0)|Evalue: 7e-04	101	10941	2	28.4	95	6.78	ISVLILQKIGRDHVKRGLQMKQFDDLTEVMVDLLKGLMGPAFTDQVLNAWRKALVVVMDVVYKQMYQTEQEQLQTLGYTTNDDNSKMQQMVNNAK	0.73	0.73
	TS18, 17	EZ761847	contig21229:1:290:3|similar to Flavohemoprotein (Q8ETH0)|Evalue: 7e-04	206	10941	4 (3)	43.2	95	6.78	ISVLILQKIGRDHVKRGLQMKQFDDLTEVMVDLLKGLMGPAFTDQVLNAWRKALVVVMDVVYKQMYQTEQEQLQTLGYTTNDDNSKMQQMVNNAK	1.27	2
others	AS16, 17	EZ759174	contig01508:1:845:3| putative dioxygenase [Pseudomonas fluorescens SBW25] (YP_002872512.1)|Evalue: 6e-35	143	32804	3	12.8	281	6.09	SVTSAIIDIRSXXIRTRGFSEAVWFQRYSVLVTFREMLSTKVIDDFERNGAVCLRNVFTDEWIKTIETGIDKSYKNPSVDCQFFCHKDSRGAYFSDCGHLRDVDEIQDFVMKSPVSKIVSELLRCQKTTFYYDRVIIREPADIYLTSFHQEISAYPFSGQQACAVWTAVDNVPLETTLKVVQGSHKWKSNYYPLHVDKRNQREKYADSGFESIPELSRLKEAMIMEWNLSPGDCVVYNLNCLVASNGNITSHPQRILVTNWFGDDVTFGPKPWTCFPSYTG	0.33	0.43	nr
	EES15	EZ759174	contig01508:1:845:3| putative dioxygenase [Pseudomonas fluorescens SBW25] (YP_002872512.1)|Evalue: 6e-35	118	32804	2	8.9	281	6.09	SVTSAIIDIRSXXIRTRGFSEAVWFQRYSVLVTFREMLSTKVIDDFERNGAVCLRNVFTDEWIKTIETGIDKSYKNPSVDCQFFCHKDSRGAYFSDCGHLRDVDEIQDFVMKSPVSKIVSELLRCQKTTFYYDRVIIREPADIYLTSFHQEISAYPFSGQQACAVWTAVDNVPLETTLKVVQGSHKWKSNYYPLHVDKRNQREKYADSGFESIPELSRLKEAMIMEWNLSPGDCVVYNLNCLVASNGNITSHPQRILVTNWFGDDVTFGPKPWTCFPSYTG	0.21	0.21	nr
	TS16	EZ759174	contig01508:1:845:3| putative dioxygenase [Pseudomonas fluorescens SBW25] (YP_002872512.1)|Evalue: 6e-35	140	32804	2	8.9	281	6.09	SVTSAIIDIRSXXIRTRGFSEAVWFQRYSVLVTFREMLSTKVIDDFERNGAVCLRNVFTDEWIKTIETGIDKSYKNPSVDCQFFCHKDSRGAYFSDCGHLRDVDEIQDFVMKSPVSKIVSELLRCQKTTFYYDRVIIREPADIYLTSFHQEISAYPFSGQQACAVWTAVDNVPLETTLKVVQGSHKWKSNYYPLHVDKRNQREKYADSGFESIPELSRLKEAMIMEWNLSPGDCVVYNLNCLVASNGNITSHPQRILVTNWFGDDVTFGPKPWTCFPSYTG	0.21	0.21	nr
	AS17, 18	EZ761355	contig18735:1:831:1|similar to Oxidoreductase HTATIP2 (Q9Z2G9)|Evalue: 1e-51	124	31547	3	11.6	276	8.7	SQRIKDFEGYYAKIVTDFXVDINRRQFEMSQLLKSFKDARKTCFVVGATGECGSELVKEIARLNPFDRVILIGRRKVEYADEALKNMEQRIVDFDNLDAHKQAFEGCDVGICTLGTTRSKSGKDGFYKVDHDYILAVAKAAKATGCRHFNLVSTTGADENAFFYMPKVKGLTDREVSEVGFDRCSIYRPAALMCDRRESRPLETVALTLLKPIQWVSPTWITIPTTSVAKAILVNCLDLSKSGNEIINKPADARDGQFLSLKDLRSRLLLFQTLQF	0.35	0.46
	EES16	EZ761355	contig18735:1:831:1|similar to Oxidoreductase HTATIP2 (Q9Z2G9)|Evalue: 1e-51	58	31547	2	7.6	276	8.7	SQRIKDFEGYYAKIVTDFXVDINRRQFEMSQLLKSFKDARKTCFVVGATGECGSELVKEIARLNPFDRVILIGRRKVEYADEALKNMEQRIVDFDNLDAHKQAFEGCDVGICTLGTTRSKSGKDGFYKVDHDYILAVAKAAKATGCRHFNLVSTTGADENAFFYMPKVKGLTDREVSEVGFDRCSIYRPAALMCDRRESRPLETVALTLLKPIQWVSPTWITIPTTSVAKAILVNCLDLSKSGNEIINKPADARDGQFLSLKDLRSRLLLFQTLQF	0.22	0.22
	TS17, 18	EZ761355	contig18735:1:831:1|similar to Oxidoreductase HTATIP2 (Q9Z2G9)|Evalue: 1e-51	100	31547	2	7.6	276	8.7	SQRIKDFEGYYAKIVTDFXVDINRRQFEMSQLLKSFKDARKTCFVVGATGECGSELVKEIARLNPFDRVILIGRRKVEYADEALKNMEQRIVDFDNLDAHKQAFEGCDVGICTLGTTRSKSGKDGFYKVDHDYILAVAKAAKATGCRHFNLVSTTGADENAFFYMPKVKGLTDREVSEVGFDRCSIYRPAALMCDRRESRPLETVALTLLKPIQWVSPTWITIPTTSVAKAILVNCLDLSKSGNEIINKPADARDGQFLSLKDLRSRLLLFQTLQF	0.22	0.33
	AS10, 9	EZ761669	contig20134:1:1502:2|similar to Electron transfer flavoprotein-ubiquinone oxidoreductase, mitochondrial (P55931)|Evalue: 0.0	200	55909	5	15.6	500	8.33	KEKGTEVRVCLTGKSGRNGNHILSGAVIEPRALSTLIPDWKERGAPLHTPVTKDSFWLLTKTGKISLPIFKGTPMWNHGNYVIRMGNFIKWLSTVAEELGVEIYSGTPAYEMLYHEDGSAKGVATNDVGIRKDGSPKEGFQRGMELHAKATVLAEGCHGHISKSVIQKYNLRSNSEPQTYGIGLKELWEVDKSMHQPGRVIHTVGWPLNRGDYGGTFMYHLGAEEGPSLVAVGLVAGLDYHNPYFNPYKEFQRFKHHPSIEPFFRNAKRIQYGARALNEGGYQSIPKLTFPGGCMVGCSPGFMNVPKVKGSHTAMMSGIIAAESIYDHLFDSQYATDSNLKGVEPTQYEERLKQSWVYKELHSVRNVRPSFHSKLGLYGGIAYTAAFYVLLRGKEPWTF…	0.26	0.32
	EES9	EZ761669	contig20134:1:1502:2|similar to Electron transfer flavoprotein-ubiquinone oxidoreductase, mitochondrial (P55931)|Evalue: 0.0	99	55909	3	5.6	500	8.33	KEKGTEVRVCLTGKSGRNGNHILSGAVIEPRALSTLIPDWKERGAPLHTPVTKDSFWLLTKTGKISLPIFKGTPMWNHGNYVIRMGNFIKWLSTVAEELGVEIYSGTPAYEMLYHEDGSAKGVATNDVGIRKDGSPKEGFQRGMELHAKATVLAEGCHGHISKSVIQKYNLRSNSEPQTYGIGLKELWEVDKSMHQPGRVIHTVGWPLNRGDYGGTFMYHLGAEEGPSLVAVGLVAGLDYHNPYFNPYKEFQRFKHHPSIEPFFRNAKRIQYGARALNEGGYQSIPKLTFPGGCMVGCSPGFMNVPKVKGSHTAMMSGIIAAESIYDHLFDSQYATDSNLKGVEPTQYEERLKQSWVYKELHSVRNVRPSFHSKLGLYGGIAYTAAFYVLLRGKEPWTF…	0.19	0.19
	TS10	EZ761669	contig20134:1:1502:2|similar to Electron transfer flavoprotein-ubiquinone oxidoreductase, mitochondrial (P55931)|Evalue: 0.0	109	55909	3	6.6	500	8.33	KEKGTEVRVCLTGKSGRNGNHILSGAVIEPRALSTLIPDWKERGAPLHTPVTKDSFWLLTKTGKISLPIFKGTPMWNHGNYVIRMGNFIKWLSTVAEELGVEIYSGTPAYEMLYHEDGSAKGVATNDVGIRKDGSPKEGFQRGMELHAKATVLAEGCHGHISKSVIQKYNLRSNSEPQTYGIGLKELWEVDKSMHQPGRVIHTVGWPLNRGDYGGTFMYHLGAEEGPSLVAVGLVAGLDYHNPYFNPYKEFQRFKHHPSIEPFFRNAKRIQYGARALNEGGYQSIPKLTFPGGCMVGCSPGFMNVPKVKGSHTAMMSGIIAAESIYDHLFDSQYATDSNLKGVEPTQYEERLKQSWVYKELHSVRNVRPSFHSKLGLYGGIAYTAAFYVLLRGKEPWTF…	0.19	0.19
Inhibitors
Protease inhibitor I39 (alpha-2-macroglobulin) family (Serine protease inhibitor)	AS4, 4-13, 15-18	EZ762099	contig22765:1:560:3|similar to CD109 antigen (Q6YHK3)|Evalue: 3e-16	422	21059	12 (8)	40	185	4.47	NNENAIVLQSAESPAFANSIMIEATGKGTALAQVTWSYNVANTTAEQSFELDVIINDNPSDYTMHVCARYKKNGVSDMVVFELETLSGFQVDEDEVHKLVLADTTPTIKRVDVENDNTKLNIYVDEIGQRPLCFDVRAYRLFKVDDLQTRTVVVYDYYNPQDRKTETYSLESSNQVSRIPENNNL	2.78	17.92
	EES4, 3, 7-9, 14	EZ762099	contig22765:1:560:3|similar to CD109 antigen (Q6YHK3)|Evalue: 3e-16	173	21059	4 (3)	17.3	185	4.47	NNENAIVLQSAESPAFANSIMIEATGKGTALAQVTWSYNVANTTAEQSFELDVIINDNPSDYTMHVCARYKKNGVSDMVVFELETLSGFQVDEDEVHKLVLADTTPTIKRVDVENDNTKLNIYVDEIGQRPLCFDVRAYRLFKVDDLQTRTVVVYDYYNPQDRKTETYSLESSNQVSRIPENNNL	0.56	1.54
	TS5, 4-18	EZ762099	contig22765:1:560:3|similar to CD109 antigen (Q6YHK3)|Evalue: 3e-16	428	21059	13 (8)	40	185	4.47	NNENAIVLQSAESPAFANSIMIEATGKGTALAQVTWSYNVANTTAEQSFELDVIINDNPSDYTMHVCARYKKNGVSDMVVFELETLSGFQVDEDEVHKLVLADTTPTIKRVDVENDNTKLNIYVDEIGQRPLCFDVRAYRLFKVDDLQTRTVVVYDYYNPQDRKTETYSLESSNQVSRIPENNNL	2.26	15.09
	TS5, 8	EZ761235	contig18156:1490:2302:3|similar to CD109 antigen (Q6YHK3)|Evalue: 6e-36	151	30612	5	13	270	5.27	METSEVKQWKASTKDILATAYALLCYTQQKDVSKSLPIVKWLLANRNENGGFGSTQDTVVGLQALADYTTLAKDSQKGLKLKISASDFVRDFSVDAVNSLLFQFVEMPKFENTVKLEATGEGTALAQVSWSYYVANATVKEVFDIDVNLKEKEHYYTLSICAKYLKDGNSGMAVAEVELLSGYQVDEDEVKKLVGGTSTPLIKRVDVEDNHTKLNIYFDEITKTPQCFDVRAYRLFKVDDIRPRNVVVYDYYDPKNRKSVSYNLDVSNQI	0.67	0.78
	AS7, 6-8, 10	EZ761000	contig16862:1:302:1|similar to CD109 antigen (Q6YHK3)|Evalue: 8e-07	80	11358	1	12	100	9.86	NRWKDDHLXAKLTASDASDSLTRDLLVKPAGERLDFNEAMFIDLRNRRKKRQTSPRQFSREIRVPELPENAVKGSTKMSISFTGDLMGPVISNLDALVRL	0.3	1.2
	TS7, 9	EZ761000	contig16862:1:302:1|similar to CD109 antigen (Q6YHK3)|Evalue: 8e-07	108	11358	2	22	100	9.86	NRWKDDHLXAKLTASDASDSLTRDLLVKPAGERLDFNEAMFIDLRNRRKKRQTSPRQFSREIRVPELPENAVKGSTKMSISFTGDLMGPVISNLDALVRL	0.7	1
	AS9, 4, 5, 10	EZ760879	contig14704:1:1125:1|similar to CD109 antigen (Q8R422)|Evalue: 1e-38	215	41759	5	14.2	374	5.32	IHKEITEGMEKGLSLTAFTLIAFLEYGSDPQFKTLIETSTKYLETELENAANSSLTLALVTYTLLLANSTRAPEAMTLLEKRAFKVNNLRYWSGTKSGEGTTETTILKLPKAPPKDILATAYALLCYTTQKDVTKALPIVRWLIPNRNANGGFTSTQDTIVGLQALAEYTALTKSGNQEISITVTGKDFEREYVVNKTNSLDFQSEPLPFQDVLKVEATGEGTALGQISWSYFVKNATAVEVFDLSVSTDEKPKFYTMFVCANYSGPSSSGMTVAEVELLSGYQVDEDEVKKLVGDSGSPLIKRVEVVDDRTKVNLYFDEIPRMPQCFKIKAYRLFAVPSPRARNVAIYDYYAPENRKSVAYVWIQSTLFKDSL	0.46	0.86
	TS9, 5, 10	EZ760879	contig14704:1:1125:1|similar to CD109 antigen (Q8R422)|Evalue: 1e-38	221	41759	6	17.1	374	5.32	IHKEITEGMEKGLSLTAFTLIAFLEYGSDPQFKTLIETSTKYLETELENAANSSLTLALVTYTLLLANSTRAPEAMTLLEKRAFKVNNLRYWSGTKSGEGTTETTILKLPKAPPKDILATAYALLCYTTQKDVTKALPIVRWLIPNRNANGGFTSTQDTIVGLQALAEYTALTKSGNQEISITVTGKDFEREYVVNKTNSLDFQSEPLPFQDVLKVEATGEGTALGQISWSYFVKNATAVEVFDLSVSTDEKPKFYTMFVCANYSGPSSSGMTVAEVELLSGYQVDEDEVKKLVGDSGSPLIKRVEVVDDRTKVNLYFDEIPRMPQCFKIKAYRLFAVPSPRARNVAIYDYYAPENRKSVAYVWIQSTLFKDSL	0.58	0.82
	AS10, 4-11	EZ760868	contig14499:601:864:1|similar to CD109 antigen (Q6YHK3)|Evalue: 1e-14	166	10000	5 (2)	36.4	88	5.37	MPHXNEKVPGFFEGSVQLSSEPVLGEWKIEVRVREKTETKTFSVQEYVLPRFDVQVKLPKYVGLADTSFDAVVEANYTFGEPVKGKLF	1.45	7.98
	TS5, 4-10, 13, 14	EZ760868	contig14499:601:864:1|similar to CD109 antigen (Q6YHK3)|Evalue: 1e-14	178	10000	6 (3)	43.2	88	5.37	MPHXNEKVPGFFEGSVQLSSEPVLGEWKIEVRVREKTETKTFSVQEYVLPRFDVQVKLPKYVGLADTSFDAVVEANYTFGEPVKGKLF	2.3	9.81
	AS5, 4-16	EZ759176	contig01519:1:1386:1|similar to CD109 antigen (Q8R422)|Evalue: 2e-80	909	51074	18 (14)	40	462	7.78	QCNPRRDTALSLLVYNYLSAAQSVAVVVTVSEGDLPPRVYNTQLNVAPSDGANATFPVKPQLVGNMTIRVELKASEAADALTRVLLVKAEGVKQTFNAPVFIDLRNTSSFSKAVQIPSLPSNVVEGSFKMFVSAIGDILGPTINGIDNLIRLPYGCGEQNMVLFAPNVFVAEYLSSMGRLTPELKDKLVRNMNSGYQRQLTFKRWDNSYSAFGTKDNEGSTWLTAFVIRSFSEARDFISIDNSTLISGLQFLSARQNESGAFYEQGKVYDKEMQGGTGKGLSLTAYVLLAFLEFGPNNTFDDNILNATRYLEFNLKSVADDQSALAITAYALQKAKSRVAQIALDLLETKAKSGNNTKYWAEEEEKEEVDLKHPYWYRWRAPPKNVQITAYGLLTYVQK…	1.56	8.41
	EES4, 4-7	EZ759176	contig01519:1:1386:1|similar to CD109 antigen (Q8R422)|Evalue: 2e-80	149	51074	4	10.8	462	7.78	QCNPRRDTALSLLVYNYLSAAQSVAVVVTVSEGDLPPRVYNTQLNVAPSDGANATFPVKPQLVGNMTIRVELKASEAADALTRVLLVKAEGVKQTFNAPVFIDLRNTSSFSKAVQIPSLPSNVVEGSFKMFVSAIGDILGPTINGIDNLIRLPYGCGEQNMVLFAPNVFVAEYLSSMGRLTPELKDKLVRNMNSGYQRQLTFKRWDNSYSAFGTKDNEGSTWLTAFVIRSFSEARDFISIDNSTLISGLQFLSARQNESGAFYEQGKVYDKEMQGGTGKGLSLTAYVLLAFLEFGPNNTFDDNILNATRYLEFNLKSVADDQSALAITAYALQKAKSRVAQIALDLLETKAKSGNNTKYWAEEEEKEEVDLKHPYWYRWRAPPKNVQITAYGLLTYVQK…	0.28	0.53
	TS5, 4-17	EZ759176	contig01519:1:1386:1|similar to CD109 antigen (Q8R422)|Evalue: 2e-80	962	51074	25 (13)	38.5	462	7.78	QCNPRRDTALSLLVYNYLSAAQSVAVVVTVSEGDLPPRVYNTQLNVAPSDGANATFPVKPQLVGNMTIRVELKASEAADALTRVLLVKAEGVKQTFNAPVFIDLRNTSSFSKAVQIPSLPSNVVEGSFKMFVSAIGDILGPTINGIDNLIRLPYGCGEQNMVLFAPNVFVAEYLSSMGRLTPELKDKLVRNMNSGYQRQLTFKRWDNSYSAFGTKDNEGSTWLTAFVIRSFSEARDFISIDNSTLISGLQFLSARQNESGAFYEQGKVYDKEMQGGTGKGLSLTAYVLLAFLEFGPNNTFDDNILNATRYLEFNLKSVADDQSALAITAYALQKAKSRVAQIALDLLETKAKSGNNTKYWAEEEEKEEVDLKHPYWYRWRAPPKNVQITAYGLLTYVQK…	1.56	8.04
	AS10, 8-10, 16	EZ762315	contig23619:142:1410:1|similar to Alpha-2-macroglobulin receptor-associated protein (Q99068)|Evalue: 2e-12	527	49117	12 (11)	31.3	422	8.19	MAKLSLLFLVLLAVVIPLVLSESKYSEEKSQPTSERHSSHSKDAKDSKDWKKSKESRDHRESKDSRDEKSSDEYKPSKDSKSKDKSKKSKDSKETKDKKYRDESDSKSKKYERKEAGESAADTYDFSTKKIKALWQKVEKKLSVEQLSKLMEALKGHDKEELDLKHRKHAGDDKDESLTEKLSAKFDDLLTKFNLTDLFKSDHLNSTKNRSKDQLFQDKKLNKLWKKAAKGNFTAEELEKLKQEFSDLQQKITDLGLRRTANTTADENTSDIDRFNSVSTASEESELLKESEQYTSGAFRDASDEIMEGYRRLKLRVSRKHSGDEFVTFHESRVEDLWNQALSAGFPREDLITIREQLYLLQNKLDKLRSYEEGLKVFKEHEGTHHSLDEMELETKTKN…	1.18	2.05
	EES9, 10, 14	EZ762315	contig23619:142:1410:1|similar to Alpha-2-macroglobulin receptor-associated protein (Q99068)|Evalue: 2e-12	1176	49117	33 (21)	46	422	8.19	MAKLSLLFLVLLAVVIPLVLSESKYSEEKSQPTSERHSSHSKDAKDSKDWKKSKESRDHRESKDSRDEKSSDEYKPSKDSKSKDKSKKSKDSKETKDKKYRDESDSKSKKYERKEAGESAADTYDFSTKKIKALWQKVEKKLSVEQLSKLMEALKGHDKEELDLKHRKHAGDDKDESLTEKLSAKFDDLLTKFNLTDLFKSDHLNSTKNRSKDQLFQDKKLNKLWKKAAKGNFTAEELEKLKQEFSDLQQKITDLGLRRTANTTADENTSDIDRFNSVSTASEESELLKESEQYTSGAFRDASDEIMEGYRRLKLRVSRKHSGDEFVTFHESRVEDLWNQALSAGFPREDLITIREQLYLLQNKLDKLRSYEEGLKVFKEHEGTHHSLDEMELETKTKN…	4.43	8.26
	TS10, 11	EZ762315	contig23619:142:1410:1|similar to Alpha-2-macroglobulin receptor-associated protein (Q99068)|Evalue: 2e-12	810	49117	24 (16)	37.9	422	8.19	MAKLSLLFLVLLAVVIPLVLSESKYSEEKSQPTSERHSSHSKDAKDSKDWKKSKESRDHRESKDSRDEKSSDEYKPSKDSKSKDKSKKSKDSKETKDKKYRDESDSKSKKYERKEAGESAADTYDFSTKKIKALWQKVEKKLSVEQLSKLMEALKGHDKEELDLKHRKHAGDDKDESLTEKLSAKFDDLLTKFNLTDLFKSDHLNSTKNRSKDQLFQDKKLNKLWKKAAKGNFTAEELEKLKQEFSDLQQKITDLGLRRTANTTADENTSDIDRFNSVSTASEESELLKESEQYTSGAFRDASDEIMEGYRRLKLRVSRKHSGDEFVTFHESRVEDLWNQALSAGFPREDLITIREQLYLLQNKLDKLRSYEEGLKVFKEHEGTHHSLDEMELETKTKN…	2.02	3.35
	AS9, 4-11, 13, 16, 17	EZ760868	contig14499:1:464:3|similar to Alpha-2-macroglobulin-like protein 1 (A8K2U0)|Evalue: 9e-05	224	17495	4	24.8	153	5.54	LYFISAPKTLRPRSTYPVDIRVMNATNAVDVYLTILRRDDDNEISVVSQNVTGLTANTERRIDIQIPKLEDGTYRLRAKVQDNKGNNYTDDEYLVVQSENRLIFIQTDKPLYKARDTVRFRVIIVDSNLVSTDEPMVIKAYVSSGQSVSCVID	1.02	6.41
	EES7, 4	EZ760868	contig14499:1:464:3|similar to Alpha-2-macroglobulin-like protein 1 (A8K2U0)|Evalue: 9e-05	76	17495	2	19.6	153	5.54	LYFISAPKTLRPRSTYPVDIRVMNATNAVDVYLTILRRDDDNEISVVSQNVTGLTANTERRIDIQIPKLEDGTYRLRAKVQDNKGNNYTDDEYLVVQSENRLIFIQTDKPLYKARDTVRFRVIIVDSNLVSTDEPMVIKAYVSSGQSVSCVID	0.42	0.61
	TS5, 4-10	EZ760868	contig14499:1:464:3|similar to Alpha-2-macroglobulin-like protein 1 (A8K2U0)|Evalue: 9e-05	209	17495	7 (4)	29.4	153	5.54	LYFISAPKTLRPRSTYPVDIRVMNATNAVDVYLTILRRDDDNEISVVSQNVTGLTANTERRIDIQIPKLEDGTYRLRAKVQDNKGNNYTDDEYLVVQSENRLIFIQTDKPLYKARDTVRFRVIIVDSNLVSTDEPMVIKAYVSSGQSVSCVID	1.02	5.97
	AS8, 5, 7,11	EZ760493	contig09859:1:353:3|similar to Ovostatin (P20740)|Evalue: 2e-19	100	12711	1	12.9	116	5.56	LTYRHADNSYSAFGSSDAYGSTWLTAFVVRSFSEAKQYIGIDDSVQQSSLRFLASKQQNDGTFLEXKGVIVHKDLTDGTDKGTSLTAYVLTAFLSMAKQSVLECRTESDTIFGGKA	0.27	1.08
	TS5, 4, 11	EZ760493	contig09859:1:353:3|similar to Ovostatin (P20740)|Evalue: 2e-19	89	12711	1	12.9	116	5.56	LTYRHADNSYSAFGSSDAYGSTWLTAFVVRSFSEAKQYIGIDDSVQQSSLRFLASKQQNDGTFLEXKGVIVHKDLTDGTDKGTSLTAYVLTAFLSMAKQSVLECRTESDTIFGGKA	0.27	0.81
	AS6, 9	EZ760910	contig15368:1:317:2|similar to Murinoglobulin-1 (P28665)|Evalue: 4e-17	40	12245	1	6.7	105	9.98	AVLRQQNMIYLAPNIFVIRYLIIIDRLTTRIRDLLIRYITLGYQSELIYRHKDNSFSAFGKADRYGSTWLTAFVIRSFAQARPYIGIDSNVLMTGLQFLASKQQE	0.28	0.56
Serpin family (Serine protease inhibitor)	TS11	EZ760455	contig09540:1:494:2|similar to Plasminogen activator inhibitor 1 (P50449)|Evalue: 1e-04	73	18426	2	17.1	164	5.91	SVLVASRGLLDPAVLDHAEFGINAFKQAASGTHDNFVLGPHSFMWMIAMFYFRTGGEARQQLVKALHFREAADALSDRDLIADWDAERPYLPCPYPIKFENGSECGRVDRVYLDEAFVLLPPAVKNPPTNFSLTNHYRNVPFSKNSAAVRQQINADIAQLTNNN	0.4	0.4
	AS13, 5, 12-19	EZ761587	contig19800:1:1133:3|similar to Leukocyte elastase inhibitor A (Q9D154)|Evalue: 7e-57	919	41290	23 (15)	42.8	376	9.01	ANGYSFSVNLFKNIASAYTTDNVFISPFSVEAALAMTYAGAAGSTAAEMAKSLGLPSDRNRAIDAVSAKYVDINNSTERGYTLRSANALFLDKKFNIKPSYQSTLQKKFASNITSVDFAGQSEAARKNINTFVATKTDNKIPELFESGSLSRETKLVIVNAVYFQSEWADTFYEGATKSDSFKLANGGTKSAKFMQQEDSGFGYLDSKALNAQVLEMKYKWGEISMVVVLPKEGSSLSDMYAQLDATKLSQLVSGIQRRKVQVFFPKFKLQKSYQMNEALQKLGIKMVFSDSADLSEMSTARDVKVSKVVQKTFVEVDEQGTTAAAATGIQIVPLSAMVSTEEPVEFRANRPFLFFIRHVKSNAVLFMGQIVDPSQ	2.43	7.09
	EES12, 11, 18	EZ761587	contig19800:1:1133:3|similar to Leukocyte elastase inhibitor A (Q9D154)|Evalue: 7e-57	314	41290	6	19.4	376	9.01	ANGYSFSVNLFKNIASAYTTDNVFISPFSVEAALAMTYAGAAGSTAAEMAKSLGLPSDRNRAIDAVSAKYVDINNSTERGYTLRSANALFLDKKFNIKPSYQSTLQKKFASNITSVDFAGQSEAARKNINTFVATKTDNKIPELFESGSLSRETKLVIVNAVYFQSEWADTFYEGATKSDSFKLANGGTKSAKFMQQEDSGFGYLDSKALNAQVLEMKYKWGEISMVVVLPKEGSSLSDMYAQLDATKLSQLVSGIQRRKVQVFFPKFKLQKSYQMNEALQKLGIKMVFSDSADLSEMSTARDVKVSKVVQKTFVEVDEQGTTAAAATGIQIVPLSAMVSTEEPVEFRANRPFLFFIRHVKSNAVLFMGQIVDPSQ	0.59	1.03
	TS13, 4, 5, 12, 15, 16, 19	EZ761587	contig19800:1:1133:3|similar to Leukocyte elastase inhibitor A (Q9D154)|Evalue: 7e-57	1032	41290	36 (18)	47.1	376	9.01	ANGYSFSVNLFKNIASAYTTDNVFISPFSVEAALAMTYAGAAGSTAAEMAKSLGLPSDRNRAIDAVSAKYVDINNSTERGYTLRSANALFLDKKFNIKPSYQSTLQKKFASNITSVDFAGQSEAARKNINTFVATKTDNKIPELFESGSLSRETKLVIVNAVYFQSEWADTFYEGATKSDSFKLANGGTKSAKFMQQEDSGFGYLDSKALNAQVLEMKYKWGEISMVVVLPKEGSSLSDMYAQLDATKLSQLVSGIQRRKVQVFFPKFKLQKSYQMNEALQKLGIKMVFSDSADLSEMSTARDVKVSKVVQKTFVEVDEQGTTAAAATGIQIVPLSAMVSTEEPVEFRANRPFLFFIRHVKSNAVLFMGQIVDPSQ	3	6.43
	AS18, 19	EZ758909	contig00038:1:298:2|similar to Leukocyte elastase inhibitor A (Q9D154)|Evalue: 3e-10	32	10611	1	7.1	98	5.84	LMSLGVRDLFDRSKADLTGISPPASENLYIAQVFHKVFIAVDEEGTEAAAATAATGVRTTAIRTPDVTLTIDHTFFFAIRHNPTNLLLFTARVADPSK	0.32	0.32
	EES11, 12	EZ758909	contig00038:1:298:2|similar to Leukocyte elastase inhibitor A (Q9D154)|Evalue: 3e-10	80	10611	2	19.4	98	5.84	LMSLGVRDLFDRSKADLTGISPPASENLYIAQVFHKVFIAVDEEGTEAAAATAATGVRTTAIRTPDVTLTIDHTFFFAIRHNPTNLLLFTARVADPSK	0.32	0.64
	TS13, 12-14, 18, 19	EZ758909	contig00038:1:298:2|similar to Leukocyte elastase inhibitor A (Q9D154)|Evalue: 3e-10	38	10611	2 (1)	7.1	98	5.84	LMSLGVRDLFDRSKADLTGISPPASENLYIAQVFHKVFIAVDEEGTEAAAATAATGVRTTAIRTPDVTLTIDHTFFFAIRHNPTNLLLFTARVADPSK	0.32	0.64
	AS13	EZ762637	contig24774:1:1265:3|similar to Serpin B4 (P48594)|Evalue: 2e-49	211	47575	3	11.2	420	6.2	SVSTHKNVLVLPDTLHQFSLQIHRLXAFLDFTEMSESSKLSKPIVNFSISLYKQLAEQAEDENIIVSPLSIYSCILLAYSGAEGSTKSDIEKALTLHKDFPQKSNVLSAFGVLMDLLNPQEKEEYPNYELAIANSLYVEKSLSLKAEYVKHAEQYFHAKPSTEDFKGDSDGARQRINLWVEELTRKKIQNLLQPGTVLPDTLLILVNAIYFKSDWDDKFSEYATSXKRSSKDMDKKNQVHMMHKEREYFYFSDHKNAFQYVEIPYNNKELSMCVVLPNDDQGXKRLESSLDAEILMQALVGASPAKVRLSLPRFKSTKDYDLENAFKGLGMSDLFSNPDFSGISDSKVKVSKAIHKAFIEVAEKGTEAAAATAMIAVGCCGPVRSKPVEPKIVNCDHPF…	0.22	0.22
	TS13	EZ762637	contig24774:1:1265:3|similar to Serpin B4 (P48594)|Evalue: 2e-49	379	47575	7	26.4	420	6.2	SVSTHKNVLVLPDTLHQFSLQIHRLXAFLDFTEMSESSKLSKPIVNFSISLYKQLAEQAEDENIIVSPLSIYSCILLAYSGAEGSTKSDIEKALTLHKDFPQKSNVLSAFGVLMDLLNPQEKEEYPNYELAIANSLYVEKSLSLKAEYVKHAEQYFHAKPSTEDFKGDSDGARQRINLWVEELTRKKIQNLLQPGTVLPDTLLILVNAIYFKSDWDDKFSEYATSXKRSSKDMDKKNQVHMMHKEREYFYFSDHKNAFQYVEIPYNNKELSMCVVLPNDDQGXKRLESSLDAEILMQALVGASPAKVRLSLPRFKSTKDYDLENAFKGLGMSDLFSNPDFSGISDSKVKVSKAIHKAFIEVAEKGTEAAAATAMIAVGCCGPVRSKPVEPKIVNCDHPF…	0.6	0.6
	AS13	EZ759471	contig03064:1:1299:1|similar to Serpin B8 (P50452)|Evalue: 2e-53	418	49035	14 (8)	24.5	432	5.84	ISHLYSASDNLNIPISXXKDVRRFLDSLNYXLLCKSIAWESLDFAEMSQSASLTKPLVNFSVSLYKELAKQAEDENIIASPLSIYSCVLLAYSGAEGSTKADIEKALSLHKDFPQKSDILSAFGGLMQLLNSQQKEEYPNYELAIANSLYVEKSLSLKAEYVKNAEQHFHAKPSTEDFKDDSDGARQRINSWVEHLTRQKIKNLLQPGVVTPDTSLILVNAIYFKSNWDWKFQAYATEEREFRGYGKRSQVQMMQKEREFPYFSDQKNRFQYVEIPYQNHELSMCVVLPDDDQGLKQLESSLAHETLIQAFSGAKEAKVQLSLPRFKSTKDYDLESAFKSLGMSDLFSDPDFSGISDSKVKVSKAIHKAFIEVTEEGTEAAAATAMSIATCSAMVSSVR…	1.05	1.05
	TS13	EZ759471	contig03064:1:1299:1|similar to Serpin B8 (P50452)|Evalue: 2e-53	511	49035	14 (9)	26.4	432	5.84	ISHLYSASDNLNIPISXXKDVRRFLDSLNYXLLCKSIAWESLDFAEMSQSASLTKPLVNFSVSLYKELAKQAEDENIIASPLSIYSCVLLAYSGAEGSTKADIEKALSLHKDFPQKSDILSAFGGLMQLLNSQQKEEYPNYELAIANSLYVEKSLSLKAEYVKNAEQHFHAKPSTEDFKDDSDGARQRINSWVEHLTRQKIKNLLQPGVVTPDTSLILVNAIYFKSNWDWKFQAYATEEREFRGYGKRSQVQMMQKEREFPYFSDQKNRFQYVEIPYQNHELSMCVVLPDDDQGLKQLESSLAHETLIQAFSGAKEAKVQLSLPRFKSTKDYDLESAFKSLGMSDLFSDPDFSGISDSKVKVSKAIHKAFIEVTEEGTEAAAATAMSIATCSAMVSSVR…	0.92	0.92
	AS12, 11	EZ763297	contig28141:1:1138:2|similar to Serpin B10 (B3RFC3)|Evalue: 8e-45	511	42716	13 (9)	34.1	378	5.26	YGGAEGTTKDEIEASLSLHKGFPQKSDVLSAFAQLMQLLNFEEVKPEPSKASKVEATSDDPNVEIIRAPIMVKHEDMQMDSKKADGTQLALANSLYVEQSLSLKPLYVKTAEQHFNAKPSTEDFRGDSEGARQRINKWVEEVTHKKITDLLQPGAVSGSTMMVLVNAIYFKAAWHNEFEVYRTEEKEFRGFNQTSQVQMMHDRRDYKYFRNDILKFHYVEIQYQKGEVSMCVVLPDEDNGLKALELSMTPELLIEAIAKASLTDVMLDFPRFKSTQDYDLEMPLKKMGMEHLFKGADFSGIADGGLSVSAVVHKAFIEVDEKGTEAAAATAMMMAYDSMMTLEAPKEPIIVNCDHPFLYVIKHNKAHLPLFFGRVADF	1.44	1.52
	TS12	EZ763297	contig28141:1:1138:2|similar to Serpin B10 (B3RFC3)|Evalue: 8e-45	446	42716	11 (9)	34.9	378	5.26	YGGAEGTTKDEIEASLSLHKGFPQKSDVLSAFAQLMQLLNFEEVKPEPSKASKVEATSDDPNVEIIRAPIMVKHEDMQMDSKKADGTQLALANSLYVEQSLSLKPLYVKTAEQHFNAKPSTEDFRGDSEGARQRINKWVEEVTHKKITDLLQPGAVSGSTMMVLVNAIYFKAAWHNEFEVYRTEEKEFRGFNQTSQVQMMHDRRDYKYFRNDILKFHYVEIQYQKGEVSMCVVLPDEDNGLKALELSMTPELLIEAIAKASLTDVMLDFPRFKSTQDYDLEMPLKKMGMEHLFKGADFSGIADGGLSVSAVVHKAFIEVDEKGTEAAAATAMMMAYDSMMTLEAPKEPIIVNCDHPFLYVIKHNKAHLPLFFGRVADF	0.95	0.95
	EES11, 12	EZ762731	contig25144:101:1438:2|similar to Serpin B10 (B3RFC3)|Evalue: 2e-43	176	48972	4	9.2	445	9.25	MGLSTSKASSHCIGRACSDPSFGIKTGSFNTGAVATSPLSLGGDWPVLSAYDRKIVTSTNNFGINVYKQVGSLTNDTISISPFSFSVAMYMLYLGARGRTQQQVKSALGMDFSYGTDSVLINTLARASSSLGFNGPQNADFAFKSANKAYIDNEFQVSKAFIDKMTGQFFNAQVERVPLKTDPDRVRLDVNKWVAQNTNNRIVNLLPPKSVDRSSTMILVNTLYLKGSWLHEFEPKLTQKRDFTLLTEQKVKVDMMSFDRPQLLKYAENEEVQYLELPYNNTDFTAVFIRPRDNAEPAVAKKRLSTATLDNTSKAAKLLLVDVRMPRFQLNIATDGKEALKAIGVTDMFDSSKADLTGFAPRLNGPNLYVSNLFHQVFIAVNEIGTEAAAATAVVTGLR…	0.3	0.37
	TS12	EZ762731	contig25144:101:1438:2|similar to Serpin B10 (B3RFC3)|Evalue: 2e-43	205	48972	4	8.8	445	9.25	MGLSTSKASSHCIGRACSDPSFGIKTGSFNTGAVATSPLSLGGDWPVLSAYDRKIVTSTNNFGINVYKQVGSLTNDTISISPFSFSVAMYMLYLGARGRTQQQVKSALGMDFSYGTDSVLINTLARASSSLGFNGPQNADFAFKSANKAYIDNEFQVSKAFIDKMTGQFFNAQVERVPLKTDPDRVRLDVNKWVAQNTNNRIVNLLPPKSVDRSSTMILVNTLYLKGSWLHEFEPKLTQKRDFTLLTEQKVKVDMMSFDRPQLLKYAENEEVQYLELPYNNTDFTAVFIRPRDNAEPAVAKKRLSTATLDNTSKAAKLLLVDVRMPRFQLNIATDGKEALKAIGVTDMFDSSKADLTGFAPRLNGPNLYVSNLFHQVFIAVNEIGTEAAAATAVVTGLR…	0.3	0.3
	EES11, 12	EZ762672	contig24933:131:844:2|similar to Serpin B3 (P29508)|Evalue: 6e-21	141	26224	3	16	237	9.07	MGNTGGNVVCPLLLPTLCKGGLNRVASDSVQAVAPSLSYFSLNGQVTNSLNNFGLDLYKQAASLTTNSVAVSPLSFAIVTYMLYFGSKGNTRSQIQKALHMDYSFGSDSTLADALASISSQLKFGHYNNTLDDFAFTSVNKAYLDTRFFIFRSFINRITGMFDATIERVPFKTSPESVRNQVNQWVSNNTNNRIQDLLPSGSVDTSTELILVNALYLKAKWLRRFDQALTSKADFTF	0.43	0.56
	AS11, 7, 19	EZ761964	contig22116:1:603:1|similar to Serpin I2 (Q9JK88)|Evalue: 1e-18	293	21832	5	32	200	9.48	PGAGTKKADFKQLDGKTVKVDMMESGLAGFFYSSTADLEYVEVPYLLPNHTAVVIVPKKDKKLDQIEKAMTPDTFTNLAKAAKIQKVLLKMPKFSVRSDLSVKELWKKMGATDVFDAAADLSALTGKRGLFVQDVLQRVQIVVDETKTGATAFTIVQRTTGNPIPPGTKIEIVLDRPFIFGIKAHKTGDMIFLSRVAAVS	1.04	1.37
	EES10	EZ761964	contig22116:1:603:1|similar to Serpin I2 (Q9JK88)|Evalue: 1e-18	321	21832	4	24.5	200	9.48	PGAGTKKADFKQLDGKTVKVDMMESGLAGFFYSSTADLEYVEVPYLLPNHTAVVIVPKKDKKLDQIEKAMTPDTFTNLAKAAKIQKVLLKMPKFSVRSDLSVKELWKKMGATDVFDAAADLSALTGKRGLFVQDVLQRVQIVVDETKTGATAFTIVQRTTGNPIPPGTKIEIVLDRPFIFGIKAHKTGDMIFLSRVAAVS	0.77	0.77
	TS11	EZ761964	contig22116:1:603:1|similar to Serpin I2 (Q9JK88)|Evalue: 1e-18	247	21832	6 (4)	24.5	200	9.48	PGAGTKKADFKQLDGKTVKVDMMESGLAGFFYSSTADLEYVEVPYLLPNHTAVVIVPKKDKKLDQIEKAMTPDTFTNLAKAAKIQKVLLKMPKFSVRSDLSVKELWKKMGATDVFDAAADLSALTGKRGLFVQDVLQRVQIVVDETKTGATAFTIVQRTTGNPIPPGTKIEIVLDRPFIFGIKAHKTGDMIFLSRVAAVS	0.77	0.77
	AS13, 11-16, 18, 19	EZ761499	contig19308:1:1054:3|similar to Serpin B3 (P29508)|Evalue: 2e-45	1107	39317	37 (15)	59.1	350	5.37	VSYTETFTFHSVTSFLKPAFLTFVLLXFISVISVPQRLVMSASKDLAAPVTNFSFALYKELQKQSKDGNIIASPLSIYSCVLLAYSGAEASTKAEIEKALYLQNDFNGKSDVLSAFSEVMKVLNPQSKGSEAQYQLAMANSLFVDKALSLKAEYLKNAEQHFRAQPSTEDFKGDSDGARERINSWVEELTRQKIQNLLQPGAVTSATLMVLVNAIYFKADWEKEFKEESTVKQDFRGYGQTFNVPLMYRKAKMLYAHHESAKFQYVELPYKQGELSFCVVLPDDDNGLKNLESNFTPEMLVEAASQTREVKVEFSLPKFKLTEEYDLGDVLPSLGMKSLFSNANLSGISD	4.46	6.98
	EES12, 13	EZ761499	contig19308:1:1054:3|similar to Serpin B3 (P29508)|Evalue: 2e-45	571	39317	15 (10)	38	350	5.37	VSYTETFTFHSVTSFLKPAFLTFVLLXFISVISVPQRLVMSASKDLAAPVTNFSFALYKELQKQSKDGNIIASPLSIYSCVLLAYSGAEASTKAEIEKALYLQNDFNGKSDVLSAFSEVMKVLNPQSKGSEAQYQLAMANSLFVDKALSLKAEYLKNAEQHFRAQPSTEDFKGDSDGARERINSWVEELTRQKIQNLLQPGAVTSATLMVLVNAIYFKADWEKEFKEESTVKQDFRGYGQTFNVPLMYRKAKMLYAHHESAKFQYVELPYKQGELSFCVVLPDDDNGLKNLESNFTPEMLVEAASQTREVKVEFSLPKFKLTEEYDLGDVLPSLGMKSLFSNANLSGISD	1.24	1.42
	TS13, 12-15	EZ761499	contig19308:1:1054:3|similar to Serpin B3 (P29508)|Evalue: 2e-45	1042	39317	38 (16)	62.3	350	5.37	VSYTETFTFHSVTSFLKPAFLTFVLLXFISVISVPQRLVMSASKDLAAPVTNFSFALYKELQKQSKDGNIIASPLSIYSCVLLAYSGAEASTKAEIEKALYLQNDFNGKSDVLSAFSEVMKVLNPQSKGSEAQYQLAMANSLFVDKALSLKAEYLKNAEQHFRAQPSTEDFKGDSDGARERINSWVEELTRQKIQNLLQPGAVTSATLMVLVNAIYFKADWEKEFKEESTVKQDFRGYGQTFNVPLMYRKAKMLYAHHESAKFQYVELPYKQGELSFCVVLPDDDNGLKNLESNFTPEMLVEAASQTREVKVEFSLPKFKLTEEYDLGDVLPSLGMKSLFSNANLSGISD	4.46	6.8
	AS13	EZ759233	contig01833:1:1065:1|similar to Serpin B3 (P29508)|Evalue: 2e-40	525	40066	11 (10)	34.5	354	8.85	VVASPLSILFAILLAYIGAENQTKTEIEKSIATGNSPRNAVLEGYTSIMRDLFPKANSSQRLYELTIANNIYVDKRFPLQTSYFDQTQRYLGVTGSAEDFMSDAEGSRKRINQWASQQTKGKIREALPSGKIDQSTVLILINAIHFKAEWIKHFDSYLTRDGPFHNLDNSQATVAIMQQTRYFQYFKDEQQHFQYIELPYAGNLNRMIIVLPDEGQRFQDIEKILTPELITATANNAHSRRVHLSMPKFKFDSQFDLKSALSSIGMDRLFSDRAELPGISTVPTKVSRAIHKAFVDVNEAGTEAAAVTVMAVAVRLSAARVEDPIVMKIDRPFLFTIRNEEKNIELFRGRVTKL	1.21	2.25
	EES12	EZ759233	contig01833:1:1065:1|similar to Serpin B3 (P29508)|Evalue: 2e-40	98	40066	3	9	354	8.85	VVASPLSILFAILLAYIGAENQTKTEIEKSIATGNSPRNAVLEGYTSIMRDLFPKANSSQRLYELTIANNIYVDKRFPLQTSYFDQTQRYLGVTGSAEDFMSDAEGSRKRINQWASQQTKGKIREALPSGKIDQSTVLILINAIHFKAEWIKHFDSYLTRDGPFHNLDNSQATVAIMQQTRYFQYFKDEQQHFQYIELPYAGNLNRMIIVLPDEGQRFQDIEKILTPELITATANNAHSRRVHLSMPKFKFDSQFDLKSALSSIGMDRLFSDRAELPGISTVPTKVSRAIHKAFVDVNEAGTEAAAVTVMAVAVRLSAARVEDPIVMKIDRPFLFTIRNEEKNIELFRGRVTKL	0.08	0.08
	TS13, 12	EZ759233	contig01833:1:1065:1|similar to Serpin B3 (P29508)|Evalue: 2e-40	512	40066	14 (10)	31.9	354	8.85	VVASPLSILFAILLAYIGAENQTKTEIEKSIATGNSPRNAVLEGYTSIMRDLFPKANSSQRLYELTIANNIYVDKRFPLQTSYFDQTQRYLGVTGSAEDFMSDAEGSRKRINQWASQQTKGKIREALPSGKIDQSTVLILINAIHFKAEWIKHFDSYLTRDGPFHNLDNSQATVAIMQQTRYFQYFKDEQQHFQYIELPYAGNLNRMIIVLPDEGQRFQDIEKILTPELITATANNAHSRRVHLSMPKFKFDSQFDLKSALSSIGMDRLFSDRAELPGISTVPTKVSRAIHKAFVDVNEAGTEAAAVTVMAVAVRLSAARVEDPIVMKIDRPFLFTIRNEEKNIELFRGRVTKL	1.04	2.25
	AS12, 13, 15-17	EZ761444	contig19095:1:1026:1|similar to Serpin B5 (Q6GLQ1)|Evalue: 3e-18	705	39422	15 (12)	51.3	341	5.94	KTKDQIERLFGFKELLQSDSTSLERIFADYRKTVDSGSRHSRNRPYDLYSMSRVAVPRNVTVVRSFDGQSEEQSSLHLSHSEVNRHVSELTNGNIEELVRDASSEPTLVSATHFFSKWESSFKSTLACTMEAFHNADGRTVSVPTLHIESRLFCTHDDDLKATILEIPMEQHEMNIQIVLPDDPKNGLRFFEENLKHDTFEILRKNWRMPLTRVYLPKFQLKNNLSLAKHLQSLGLTDLFSENSLSGITSKAKLGDVIHGASINLSDRVGNPVPAEPRADRPGECRVMEPPSYPMGLHIDRPFLFNIKMRWPEVWYLMGHIENLESKENRKEYDYEHDTES	1.85	2.26
	EES11	EZ761444	contig19095:1:1026:1|similar to Serpin B5 (Q6GLQ1)|Evalue: 3e-18	75	39422	2	5.9	341	5.94	KTKDQIERLFGFKELLQSDSTSLERIFADYRKTVDSGSRHSRNRPYDLYSMSRVAVPRNVTVVRSFDGQSEEQSSLHLSHSEVNRHVSELTNGNIEELVRDASSEPTLVSATHFFSKWESSFKSTLACTMEAFHNADGRTVSVPTLHIESRLFCTHDDDLKATILEIPMEQHEMNIQIVLPDDPKNGLRFFEENLKHDTFEILRKNWRMPLTRVYLPKFQLKNNLSLAKHLQSLGLTDLFSENSLSGITSKAKLGDVIHGASINLSDRVGNPVPAEPRADRPGECRVMEPPSYPMGLHIDRPFLFNIKMRWPEVWYLMGHIENLESKENRKEYDYEHDTES	0.17	0.17
	TS12, 13	EZ761444	contig19095:1:1026:1|similar to Serpin B5 (Q6GLQ1)|Evalue: 3e-18	604	39422	17 (12)	51.3	341	5.94	KTKDQIERLFGFKELLQSDSTSLERIFADYRKTVDSGSRHSRNRPYDLYSMSRVAVPRNVTVVRSFDGQSEEQSSLHLSHSEVNRHVSELTNGNIEELVRDASSEPTLVSATHFFSKWESSFKSTLACTMEAFHNADGRTVSVPTLHIESRLFCTHDDDLKATILEIPMEQHEMNIQIVLPDDPKNGLRFFEENLKHDTFEILRKNWRMPLTRVYLPKFQLKNNLSLAKHLQSLGLTDLFSENSLSGITSKAKLGDVIHGASINLSDRVGNPVPAEPRADRPGECRVMEPPSYPMGLHIDRPFLFNIKMRWPEVWYLMGHIENLESKENRKEYDYEHDTES	1.85	2.23
	EES10	EZ761235	contig18156:143:1384:2|similar to Serpin I2 (Q9JK88)|Evalue: 1e-35	179	46149	3	9.2	413	6.92	MSCIDIEAGRALAPNLDPTIFESHQSIAVNFYKQAALMHSGSFAFSPLSFMMIGTLLYFGSNGNTREQLGRSMSLPANYSTEAFERSLSQFSANEGYQNSGRGCDRNFKFLPATGFFVDSTYTVKNATLDYISNNVQKIQCNCTTPVEVIRAPFSADNAAAKIQIEKWIRSHSDTNISTNLPNNFSTPTTRMIVVGLISFQARWRNAFREKGTIRADFTQIDGAKVRVDMMTTDLTAFAYTSTPDFEYIEVPYLQLNYTALVILPRANTTLEQIEKALTPEIFTKLAENAQIQPMIFKMPRFHIRSDLSVKEVWQKTGAIDIFNANADFSALTSNGGLSVQDIVQRVEIVVDETKTGATAFTIVQRSTGPPVPIEASINVTVNRSFIFAVKVYKTGDII…	0.23	0.23
	EES12, 11	EZ761187	contig17915:352:1599:1|similar to Serpin B3 (P29508)|Evalue: 3e-33	42	45692	1	2.2	415	9.18	MDSTGVHAIPYLIPPLPSVSLDGRIVNSLNTFGVDLYHKAAAVAANNSVAVSPLSFAIITYMLYFGSKGNTQTQIRRALHMDFSYGGDSILADRLASLSSRLKFGNYKNASDDFAFASVNKAYLDQRFLIYRSYVNLISGRLFNASVERVPFKTNPESVRNQINQWVSSNTNNRIQNLLPPNSVDESTAMVLVNALYLKAKWRHQFEPRLTKKADFTRLNGQKVKVDMMTSGVEFLDYFANEYVQCVEFPYLNTDFTAVVIVPRANNEPELEQIGLSAAGVAYLATLVRTKRVILNLPKIQSNFRHKXXKDALRALGVTDIFSADDADLSGITPQTATSPTLSIAQVFHKVFIGVDEGGTEAAAATAATGLFTSTNTGMLDAPVVVTADRTFFFAIRHN…	0.07	0.14
	EES11, 12	EZ760881	contig14730:1:321:1|similar to Uncharacterized serpin-like protein MA_2246 (Q8TNN7)|Evalue: 1e-04	99	12401	2	21.7	106	9.35	PEHLRYFENEELQYVELKYRNRNFTALFLLPKKIDGIRTLESRLTADYFLQLRGSQKRKKLLLVYQGSEXELNLNCNXLFKKLGINDLFVPNVANLSGIAPNLLSV	0.63	0.91
	AS13, 12-16, 18-20	EZ761078	contig17490:79:1254:1|similar to Uncharacterized serpin-like protein MM_2675 (Q8PTN8)|Evalue: 1e-34	929	44072	28 (19)	48.3	391	8.37	MARTSGVNLIVDPMIQFGTSLHREIALNQTDNFAISPLSLTVTAVLLLVGSKENTRKELQKSFKLPDSLFRKDDTKFLNLLKRANNDLGFGKTDDSTDYXXEFTSVNKMFVDSNFAVLPSYRSTITEDLFNGAVENVPYAQXPEGQRTAINRYVANQTHDRIKELLPPKSITKSTAALLTNVVYFKGKWETTFPLQMTQKQDFTNIDGSKSKVDMMGYNLDPHLRYFENEDLQYVELKYRNDKFTALFLLPKTVDGIRTVERKLTVEYISDLKNSAQLQKTTLRIPRFRVELDLDCIPLFKKLGINDLFXXPNVANLNGIAPNLFVSLIQHKAFIDVNEEGTEAAAATAVLLGVGATPGPPKEFIADHPFVFAIRNDRTGLLLFTARVAKF	3.56	5.8
	EES12, 11	EZ761078	contig17490:79:1254:1|similar to Uncharacterized serpin-like protein MM_2675 (Q8PTN8)|Evalue: 1e-34	62	44072	2	4.6	391	8.37	MARTSGVNLIVDPMIQFGTSLHREIALNQTDNFAISPLSLTVTAVLLLVGSKENTRKELQKSFKLPDSLFRKDDTKFLNLLKRANNDLGFGKTDDSTDYXXEFTSVNKMFVDSNFAVLPSYRSTITEDLFNGAVENVPYAQXPEGQRTAINRYVANQTHDRIKELLPPKSITKSTAALLTNVVYFKGKWETTFPLQMTQKQDFTNIDGSKSKVDMMGYNLDPHLRYFENEDLQYVELKYRNDKFTALFLLPKTVDGIRTVERKLTVEYISDLKNSAQLQKTTLRIPRFRVELDLDCIPLFKKLGINDLFXXPNVANLNGIAPNLFVSLIQHKAFIDVNEEGTEAAAATAVLLGVGATPGPPKEFIADHPFVFAIRNDRTGLLLFTARVAKF	0.16	0.23
	TS13, 5, 12-14, 16, 19	EZ761078	contig17490:79:1254:1|similar to Uncharacterized serpin-like protein MM_2675 (Q8PTN8)|Evalue: 1e-34	770	44072	21 (16)	43.5	391	8.37	MARTSGVNLIVDPMIQFGTSLHREIALNQTDNFAISPLSLTVTAVLLLVGSKENTRKELQKSFKLPDSLFRKDDTKFLNLLKRANNDLGFGKTDDSTDYXXEFTSVNKMFVDSNFAVLPSYRSTITEDLFNGAVENVPYAQXPEGQRTAINRYVANQTHDRIKELLPPKSITKSTAALLTNVVYFKGKWETTFPLQMTQKQDFTNIDGSKSKVDMMGYNLDPHLRYFENEDLQYVELKYRNDKFTALFLLPKTVDGIRTVERKLTVEYISDLKNSAQLQKTTLRIPRFRVELDLDCIPLFKKLGINDLFXXPNVANLNGIAPNLFVSLIQHKAFIDVNEEGTEAAAATAVLLGVGATPGPPKEFIADHPFVFAIRNDRTGLLLFTARVAKF	2.42	3.36
Papilin family (Serine protease inhibitor)	AS7, 6-9, 11	EZ760230	contig07766:1:563:3|similar to Papilin (O95428)|Evalue: 4e-18	161	21477	7 (3)	22	186	8.11	YDDQSVYVCTADNGIHTPALKNVVFRVHEETTAQIVSSSSNFEAGSLLRLDCRTSGFPPARVRWYKNAQEVMSDGDRSQVFSNGTLIIKRLRAGDGGVYQCQANNEQSSASDSLRIYVTGARLPQECSDNEYYANCKLIVMAELCSNEYYSKFCCKSCVEAGQLRPEFRRRKRRRLEQQNDATSAQ	0.55	1.37
	EES2, 2-4, 7	EZ760230	contig07766:1:563:3|similar to Papilin (O95428)|Evalue: 4e-18	213	21477	6 (4)	30.1	186	8.11	YDDQSVYVCTADNGIHTPALKNVVFRVHEETTAQIVSSSSNFEAGSLLRLDCRTSGFPPARVRWYKNAQEVMSDGDRSQVFSNGTLIIKRLRAGDGGVYQCQANNEQSSASDSLRIYVTGARLPQECSDNEYYANCKLIVMAELCSNEYYSKFCCKSCVEAGQLRPEFRRRKRRRLEQQNDATSAQ	1.07	1.94
	TS7, 6-11	EZ760230	contig07766:1:563:3|similar to Papilin (O95428)|Evalue: 4e-18	109	21477	3 (2)	18.3	186	8.11	YDDQSVYVCTADNGIHTPALKNVVFRVHEETTAQIVSSSSNFEAGSLLRLDCRTSGFPPARVRWYKNAQEVMSDGDRSQVFSNGTLIIKRLRAGDGGVYQCQANNEQSSASDSLRIYVTGARLPQECSDNEYYANCKLIVMAELCSNEYYSKFCCKSCVEAGQLRPEFRRRKRRRLEQQNDATSAQ	0.34	1.5
	AS8, 7-9	EZ759175	contig01516:1:634:2|similar to Papilin (Q868Z9)|Evalue: 2e-19	88	23104	2	10.4	211	4.76	RECAAGSCDRTCHNDNDCAGXPECCSNGCGSTCMTPLEIEGEPTIEVSPITSTPXSGGPYAAYIVPGVPEVRAEPATSVSLPCDARGEPHPQVYWQHGSRIISSTEPRFVTRANELAIESVQEQDAGEYICIANNGIGPSAEARVNLILESVXTNSGRESLVNVRLNDRAVLKCDARGIPPPRITWTKGGEAIASDSAKYRQMPDNSLVIE	0.31	0.61
	EES2, 1-4	EZ759175	contig01516:1:634:2|similar to Papilin (Q868Z9)|Evalue: 2e-19	254	23104	7 (4)	22.3	211	4.76	RECAAGSCDRTCHNDNDCAGXPECCSNGCGSTCMTPLEIEGEPTIEVSPITSTPXSGGPYAAYIVPGVPEVRAEPATSVSLPCDARGEPHPQVYWQHGSRIISSTEPRFVTRANELAIESVQEQDAGEYICIANNGIGPSAEARVNLILESVXTNSGRESLVNVRLNDRAVLKCDARGIPPPRITWTKGGEAIASDSAKYRQMPDNSLVIE	0.97	1.47
	TS7, 6, 9-12	EZ759175	contig01516:1:634:2|similar to Papilin (Q868Z9)|Evalue: 2e-19	103	23104	3	17.1	211	4.76	RECAAGSCDRTCHNDNDCAGXPECCSNGCGSTCMTPLEIEGEPTIEVSPITSTPXSGGPYAAYIVPGVPEVRAEPATSVSLPCDARGEPHPQVYWQHGSRIISSTEPRFVTRANELAIESVQEQDAGEYICIANNGIGPSAEARVNLILESVXTNSGRESLVNVRLNDRAVLKCDARGIPPPRITWTKGGEAIASDSAKYRQMPDNSLVIE	0.31	1.06
Cystatin family (Thiol proteinase inhibitor)	EES21, 22	EZ763202	contig27581:79:438:1|similar to Cystatin-B (Q862Z5)|Evalue: 2e-13	207	12667	15 (5)	42	119	9.26	MSRFLVSIALLVLLAAVAMAGLLGGMGDVKPADEKSQAIADQMKSQILEKLGAAQPSQWKVISYKTQIVGGINYFLKIQTGDGQFIHAKVNKPLPQSNDGPKVLSAQSGKSQSEDIAFM	7.64	8.69
	TS23, 24	EZ763202	contig27581:79:438:1|similar to Cystatin-B (Q862Z5)|Evalue: 2e-13	46	12667	1	10.1	119	9.26	MSRFLVSIALLVLLAAVAMAGLLGGMGDVKPADEKSQAIADQMKSQILEKLGAAQPSQWKVISYKTQIVGGINYFLKIQTGDGQFIHAKVNKPLPQSNDGPKVLSAQSGKSQSEDIAFM	0.27	0.54
	EES21, 20	EZ761036	contig17172:816:1172:2|similar to Cystatin-B (Q8I030)|Evalue: 7e-17	140	12778	4 (3)	28	118	6.56	MSRLLVVVALLVFVAGVEMVGMPGGIGASKPADAEVQAIADQTKTQVLAKLNSQPTEWKVISYKTQVVAGTMYFLKIQTGANQFIHVKIFKPLPYTNQGPQVESVETGKTEAEDITFM	1.59	2.2
Others	AS18, 16-18	EZ761224	contig18104:168:770:3|similar to Serine protease inhibitor dipetalogastin (O96790)|Evalue: 1e-14	393	23025	15 (9)	49	200	6.36	MELSLLLALIVSFTCFSRESLAYDWGIVSEPIVDPCKCTKEYKPVCGVNGKKYSNQCMARCAGIEIDTTKDCGVIRVTRPPVDSESQNINVDPCKCTKNYRPVCGVDGNQYSNECMARCKGVQVDTTKDCGLIKRPEGVILPTAGREDDAKTTDEPCRCAKLYRPVCGVDGKVYSNECMAECKGVEVDKTRDCGVLVVRP	3.47	6.03
	EES3, 1, 16	EZ761224	contig18104:168:770:3|similar to Serine protease inhibitor dipetalogastin (O96790)|Evalue: 1e-14	36	23025	1	5	200	6.36	MELSLLLALIVSFTCFSRESLAYDWGIVSEPIVDPCKCTKEYKPVCGVNGKKYSNQCMARCAGIEIDTTKDCGVIRVTRPPVDSESQNINVDPCKCTKNYRPVCGVDGNQYSNECMARCKGVQVDTTKDCGLIKRPEGVILPTAGREDDAKTTDEPCRCAKLYRPVCGVDGKVYSNECMAECKGVEVDKTRDCGVLVVRP	0.15	0.45
	TS18, 16-18	EZ761224	contig18104:168:770:3|similar to Serine protease inhibitor dipetalogastin (O96790)|Evalue: 1e-14	428	23025	19 (10)	59.5	200	6.36	MELSLLLALIVSFTCFSRESLAYDWGIVSEPIVDPCKCTKEYKPVCGVNGKKYSNQCMARCAGIEIDTTKDCGVIRVTRPPVDSESQNINVDPCKCTKNYRPVCGVDGNQYSNECMARCKGVQVDTTKDCGLIKRPEGVILPTAGREDDAKTTDEPCRCAKLYRPVCGVDGKVYSNECMAECKGVEVDKTRDCGVLVVRP	2.9	5.02
ATPase inhibitor family	AS16, 17	EZ763104	contig26952:1:404:3|similar to ATPase inhibitor mai-2, mitochondrial (A8XZB0)|Evalue: 1e-09	90	15233	2	17.2	134	9.52	KWHFDFPTTAFVESSKXLRKNAVVIVWRLRSGSGRGGGTGGSIRDAGGAFGRMEAAREEEYFRRLQKEQLEKYKKHVDHEISFHEEQLREHQEAIERHKKLRDTLHTDTSRSAGQGSSGARSSFQDFSSGSNYS	0.5	0.72
	TS16, 17	EZ763104	contig26952:1:404:3|similar to ATPase inhibitor mai-2, mitochondrial (A8XZB0)|Evalue: 1e-09	134	15233	4 (3)	23.1	134	9.52	KWHFDFPTTAFVESSKXLRKNAVVIVWRLRSGSGRGGGTGGSIRDAGGAFGRMEAAREEEYFRRLQKEQLEKYKKHVDHEISFHEEQLREHQEAIERHKKLRDTLHTDTSRSAGQGSSGARSSFQDFSSGSNYS	1.24	2, 07
Proteasome inhibitor PI31 family	AS15, 14	EZ762440	contig24126:143:870:2|similar to Putative proteasome inhibitor (Q9V637)|Evalue: 3e-09	126	27010	2	17.8	242	5.51	MASIQGLDVFFQLMKSQIKSRQQVAVATVHWILINKGFRCLGILEDMPASRDTTDEGAETLPDNWNTDADLYSLMYVHSAHQSEMYLIKFIAAGNDTLMVNALFKTRPAEFISFDLSSDYYVPENWLTFTSISKFPRYKQLIDFINENLVTKLKADKQHVQTGTSTRSSNADTVPKRPSNPTPDSALGTTTPSPQPTPEIPSPLLREFLPPSSSRDAYALGSRDLNPFSGFGGNIMGPHDIF	0.26	0.38
	EES14, 13	EZ762440	contig24126:143:870:2|similar to Putative proteasome inhibitor (Q9V637)|Evalue: 3e-09	57	27010	1	5.4	242	5.51	MASIQGLDVFFQLMKSQIKSRQQVAVATVHWILINKGFRCLGILEDMPASRDTTDEGAETLPDNWNTDADLYSLMYVHSAHQSEMYLIKFIAAGNDTLMVNALFKTRPAEFISFDLSSDYYVPENWLTFTSISKFPRYKQLIDFINENLVTKLKADKQHVQTGTSTRSSNADTVPKRPSNPTPDSALGTTTPSPQPTPEIPSPLLREFLPPSSSRDAYALGSRDLNPFSGFGGNIMGPHDIF	0.12	0.24
	TS15, 14, 17	EZ762440	contig24126:143:870:2|similar to Putative proteasome inhibitor (Q9V637)|Evalue: 3e-09	126	27010	2	17.8	242	5.51	MASIQGLDVFFQLMKSQIKSRQQVAVATVHWILINKGFRCLGILEDMPASRDTTDEGAETLPDNWNTDADLYSLMYVHSAHQSEMYLIKFIAAGNDTLMVNALFKTRPAEFISFDLSSDYYVPENWLTFTSISKFPRYKQLIDFINENLVTKLKADKQHVQTGTSTRSSNADTVPKRPSNPTPDSALGTTTPSPQPTPEIPSPLLREFLPPSSSRDAYALGSRDLNPFSGFGGNIMGPHDIF	0.26	0.5
CRISP family	AS17, 15-20	EZ760305	contig08352:51:734:3|similar to Ophanin (Q7ZT98)|Evalue: 1e-24	485	24894	19 (9)	49.3	227	7.67	MLRIAFIVLLAIALVAGESEEEHNGGQHEGDSHGIADLIHNNPILPKITDNLMKKDVPAMRAAGSQETSVAAIQKVIVDEHNRFRKAVVPKAKSMPTMTWDPKAAEKAVAWAKKCKWGHSPGEHRTTSDGPCGENIAMNTGGADWAKSIGQWAGEAKDYSYASNSSPNGAVVGHWTQMIWAKSVRIGCGYSKCTTGSPFGGSEPWHYFVCNYCPPGNMMGQKPYEQA	2.53	5.64
calcium channel inhibitor activity	EES16, 17	EZ760305	contig08352:51:734:3|similar to Ophanin (Q7ZT98)|Evalue: 1e-24	119	24894	2	9.7	227	7.67	MLRIAFIVLLAIALVAGESEEEHNGGQHEGDSHGIADLIHNNPILPKITDNLMKKDVPAMRAAGSQETSVAAIQKVIVDEHNRFRKAVVPKAKSMPTMTWDPKAAEKAVAWAKKCKWGHSPGEHRTTSDGPCGENIAMNTGGADWAKSIGQWAGEAKDYSYASNSSPNGAVVGHWTQMIWAKSVRIGCGYSKCTTGSPFGGSEPWHYFVCNYCPPGNMMGQKPYEQA	0.29	0.42
	TS18, 16-20	EZ760305	contig08352:51:734:3|similar to Ophanin (Q7ZT98)|Evalue: 1e-24	487	24894	18 (8)	46.3	227	7.67	MLRIAFIVLLAIALVAGESEEEHNGGQHEGDSHGIADLIHNNPILPKITDNLMKKDVPAMRAAGSQETSVAAIQKVIVDEHNRFRKAVVPKAKSMPTMTWDPKAAEKAVAWAKKCKWGHSPGEHRTTSDGPCGENIAMNTGGADWAKSIGQWAGEAKDYSYASNSSPNGAVVGHWTQMIWAKSVRIGCGYSKCTTGSPFGGSEPWHYFVCNYCPPGNMMGQKPYEQA	1.74	4.4
Peptidases
peptidase S1 family. Plasminogen subfamily.	AS16, 17	EZ762305	contig23591:1:328:2|similar to Plasminogen (P06868)|Evalue: 4e-11	136	11694	3	46.3	108	8.35	EILRYAGVPIVANEVCAAAFKNEKLAPKLKEPFGVLDETQICAGGISQRDACYGDGGSPLVCWSGRNFYQAGVVSYGRGCGKPLVAAVYGSVNAAYPWITQTINVVKS	1.17	1.85
seine protease	EES15	EZ762305	contig23591:1:328:2|similar to Plasminogen (P06868)|Evalue: 4e-11	240	11694	5 (4)	46.3	108	8.35	EILRYAGVPIVANEVCAAAFKNEKLAPKLKEPFGVLDETQICAGGISQRDACYGDGGSPLVCWSGRNFYQAGVVSYGRGCGKPLVAAVYGSVNAAYPWITQTINVVKS	1.81	1.81
	TS16, 17	EZ762305	contig23591:1:328:2|similar to Plasminogen (P06868)|Evalue: 4e-11	176	11694	3	46.3	108	8.35	EILRYAGVPIVANEVCAAAFKNEKLAPKLKEPFGVLDETQICAGGISQRDACYGDGGSPLVCWSGRNFYQAGVVSYGRGCGKPLVAAVYGSVNAAYPWITQTINVVKS	1.17	1.85
	AS9, 8	EZ759506	contig03269:1:1861:3|seems to belong to peptidase S1 family|Best-hit: Plasminogen (Q01177)|Evalue: 3e-36	227	69379	4	9.9	619	6.05	SALQSFSTENGKVRRCLGSPLQRRLCNPLLDSALDIRAECSGSQVIDSESGRLTTDSFFPQTTFNPASRSCRLIFKAVAGKVTELTFTQSTDKICDEEYFSFYTDSAVTSEPVCGVTSAAVKGPICRQSSTFKKYITEGTFIVEYCRTQLPVSQYTKTNGLQVAWRTVPSIPKVPEQNQLHVMVKASDNGNFSTAPSPLGFAQYPSNVIRRYKIVAPESYHVRIWVSHVLEKSTDCSADSIRVYEENGASVKVHDTLCGNGRRVYTSDSTELFVEFKSDSALAAGGFLVHYRAVAAKCAEDEFLCEGSRKCVKYSKRCDGVRDCDDGFDEIRENCGLECGKPAVEPIDVHPSVHSRIVGGTIAKPNSWPSQIGIVNRADNLNSCGGTLINNQWIVTAGH…	0.2	0.25
	TS9	EZ759506	contig03269:1:1861:3|seems to belong to peptidase S1 family|Best-hit: Plasminogen (Q01177)|Evalue: 3e-36	120	69379	3	7.8	619	6.05	SALQSFSTENGKVRRCLGSPLQRRLCNPLLDSALDIRAECSGSQVIDSESGRLTTDSFFPQTTFNPASRSCRLIFKAVAGKVTELTFTQSTDKICDEEYFSFYTDSAVTSEPVCGVTSAAVKGPICRQSSTFKKYITEGTFIVEYCRTQLPVSQYTKTNGLQVAWRTVPSIPKVPEQNQLHVMVKASDNGNFSTAPSPLGFAQYPSNVIRRYKIVAPESYHVRIWVSHVLEKSTDCSADSIRVYEENGASVKVHDTLCGNGRRVYTSDSTELFVEFKSDSALAAGGFLVHYRAVAAKCAEDEFLCEGSRKCVKYSKRCDGVRDCDDGFDEIRENCGLECGKPAVEPIDVHPSVHSRIVGGTIAKPNSWPSQIGIVNRADNLNSCGGTLINNQWIVTAGH…	0.15	0.15
peptidase S1 family. Plasma kallikrein subfamily.	AS15, 16	EZ759867	contig05316:295:1869:1|similar to Plasma kallikrein (Q2KJ63)|Evalue: 4e-19	105	59524	2	4.8	524	6.7	MKACETPFGYGRCVADRKCCQDFGGIIFTSEGLLTPKKEMMQYRIAGINAPSNFVPGDDRSSDGDDGPGHIFPRSNLLGCEDSQICCYMPPVIPENSRESALCNNCGLKGDGDNRFIVETGMPSKDMAFQAFQNKQPTTTTTTTTTTTTTTPRPPPPQPQPQRPNDEFQLPNVPLRDLPFRKVIPRLFDSTYSFDYTKMARIINGNNARKNAHCWQVALSNASGVFGSGVLLDSTTVLTVAHKVAGLRRTEFIAIVGAYDFASDELFTQTYYSYPLEIIVHPRYDPNTFENDIAILKIPTTACDKPNVCTLCLNGGSVDQNSCMIRPLTADFMPKAMKTNPSENLITNRDAFLTFADFAPRAESPACSRRCYVTGWGTTREQEIATVLQESRMVIINNR…	0.11	0.17
	EES14	EZ759867	contig05316:295:1869:1|similar to Plasma kallikrein (Q2KJ63)|Evalue: 4e-19	115	59524	2	4.8	524	6.7	MKACETPFGYGRCVADRKCCQDFGGIIFTSEGLLTPKKEMMQYRIAGINAPSNFVPGDDRSSDGDDGPGHIFPRSNLLGCEDSQICCYMPPVIPENSRESALCNNCGLKGDGDNRFIVETGMPSKDMAFQAFQNKQPTTTTTTTTTTTTTTPRPPPPQPQPQRPNDEFQLPNVPLRDLPFRKVIPRLFDSTYSFDYTKMARIINGNNARKNAHCWQVALSNASGVFGSGVLLDSTTVLTVAHKVAGLRRTEFIAIVGAYDFASDELFTQTYYSYPLEIIVHPRYDPNTFENDIAILKIPTTACDKPNVCTLCLNGGSVDQNSCMIRPLTADFMPKAMKTNPSENLITNRDAFLTFADFAPRAESPACSRRCYVTGWGTTREQEIATVLQESRMVIINNR…	0.11	0.11
	TS15, 16	EZ759867	contig05316:295:1869:1|similar to Plasma kallikrein (Q2KJ63)|Evalue: 4e-19	91	59524	2	4.4	524	6.7	MKACETPFGYGRCVADRKCCQDFGGIIFTSEGLLTPKKEMMQYRIAGINAPSNFVPGDDRSSDGDDGPGHIFPRSNLLGCEDSQICCYMPPVIPENSRESALCNNCGLKGDGDNRFIVETGMPSKDMAFQAFQNKQPTTTTTTTTTTTTTTPRPPPPQPQPQRPNDEFQLPNVPLRDLPFRKVIPRLFDSTYSFDYTKMARIINGNNARKNAHCWQVALSNASGVFGSGVLLDSTTVLTVAHKVAGLRRTEFIAIVGAYDFASDELFTQTYYSYPLEIIVHPRYDPNTFENDIAILKIPTTACDKPNVCTLCLNGGSVDQNSCMIRPLTADFMPKAMKTNPSENLITNRDAFLTFADFAPRAESPACSRRCYVTGWGTTREQEIATVLQESRMVIINNR…	0.11	0.17
	AS16, 15	EZ759687	contig04234:1:1412:1|similar to Plasma kallikrein (P26262)|Evalue: 5e-24	87	51095	2	5.3	470	8.39	NCTLFCRIDRRFHREKHSTDTNVTFGIKRYFRNIXIEIFKIMDYKRLANTVFFLTASLVCAAYGQGSTTTCNVNSAFGICIPSSLAQSCPQLGLTFAQGSCSQGLQCCYNPLQIPGTLTTIAPPQSQICGVSISGGGGSGLIPGGGLITPRGGSAEAIDPPLQIMSRMARILGGIQVTNINEFCWIAAVTINRKYTAVGSIVDREWVLTTATAVIRFRNMPQGQTQLTGEVALGLPSLNSTINPTPQLYSFDRIEFHPDFRVINGIPINDAALLHLRTPIDFTQRPDLCIACLADNSTFSGPSGTNQRCRVAGYGITTEGNSNTPIDGWLRQIDVPLIPDLYCQLALQAALRNNNFRLDQNAICAGGEQGKDTCARDAGAPLTCLSGSTGQQTVAGIAS…	0.13	0.19
	EES14, 13	EZ759687	contig04234:1:1412:1|similar to Plasma kallikrein (P26262)|Evalue: 5e-24	92	51095	2	5.1	470	8.39	NCTLFCRIDRRFHREKHSTDTNVTFGIKRYFRNIXIEIFKIMDYKRLANTVFFLTASLVCAAYGQGSTTTCNVNSAFGICIPSSLAQSCPQLGLTFAQGSCSQGLQCCYNPLQIPGTLTTIAPPQSQICGVSISGGGGSGLIPGGGLITPRGGSAEAIDPPLQIMSRMARILGGIQVTNINEFCWIAAVTINRKYTAVGSIVDREWVLTTATAVIRFRNMPQGQTQLTGEVALGLPSLNSTINPTPQLYSFDRIEFHPDFRVINGIPINDAALLHLRTPIDFTQRPDLCIACLADNSTFSGPSGTNQRCRVAGYGITTEGNSNTPIDGWLRQIDVPLIPDLYCQLALQAALRNNNFRLDQNAICAGGEQGKDTCARDAGAPLTCLSGSTGQQTVAGIAS…	0.13	0.19
	TS16, 15	EZ759687	contig04234:1:1412:1|similar to Plasma kallikrein (P26262)|Evalue: 5e-24	44	51095	1	3	470	8.39	NCTLFCRIDRRFHREKHSTDTNVTFGIKRYFRNIXIEIFKIMDYKRLANTVFFLTASLVCAAYGQGSTTTCNVNSAFGICIPSSLAQSCPQLGLTFAQGSCSQGLQCCYNPLQIPGTLTTIAPPQSQICGVSISGGGGSGLIPGGGLITPRGGSAEAIDPPLQIMSRMARILGGIQVTNINEFCWIAAVTINRKYTAVGSIVDREWVLTTATAVIRFRNMPQGQTQLTGEVALGLPSLNSTINPTPQLYSFDRIEFHPDFRVINGIPINDAALLHLRTPIDFTQRPDLCIACLADNSTFSGPSGTNQRCRVAGYGITTEGNSNTPIDGWLRQIDVPLIPDLYCQLALQAALRNNNFRLDQNAICAGGEQGKDTCARDAGAPLTCLSGSTGQQTVAGIAS…	0.06	0.12
	AS13, 12	EZ762543	contig24422:1:599:3|similar to Plasma kallikrein (P26262)|Evalue: 1e-12	255	21837	6 (4)	38.9	198	9.07	KFILTSAHCFHRLTDKPYRFVAKVGSATLANADTYQIEKIINHPDFNALNLQNNIALIKLRNPVAKSANTLPICFSDASSVPTNCQTFGWGRTSATNINSYSSNMKVLATTTADCSISSGSPVLNDNTKTCARFSSGALCYGDNGGPLVCKNPETNRYQVYGINTLSIACTSSSRPPAVFNKVDGAFFTWIQTTMQSA	0.77	0.92
	TS13, 12	EZ762543	contig24422:1:599:3|similar to Plasma kallikrein (P26262)|Evalue: 1e-12	405	21837	9 (6)	54	198	9.07	KFILTSAHCFHRLTDKPYRFVAKVGSATLANADTYQIEKIINHPDFNALNLQNNIALIKLRNPVAKSANTLPICFSDASSVPTNCQTFGWGRTSATNINSYSSNMKVLATTTADCSISSGSPVLNDNTKTCARFSSGALCYGDNGGPLVCKNPETNRYQVYGINTLSIACTSSSRPPAVFNKVDGAFFTWIQTTMQSA	1.35	1.5
Peptidase A1 family (aspartyl proteases)
	EES10, 11, 20	EZ761185	contig17912:1:115:2|similar to Lysosomal aspartic protease (Q03168)|Evalue: 1e-04	66	4430	1	29.7	37	9.31	DVFIGRYYTEFDVENDRVGFAKVKSPEKRASRHHHKL	0.84	2.52
	AS14, 12-17	EZ762184	contig23128:964:1796:1|similar to Lysosomal aspartic protease (Q03168)|Evalue: 2e-79	214	30587	5 (4)	26	277	5.88	MKLALVLVAIVLLLGAIDARRKTSRSHRHTTNDRLKRISLHKMQSVRRQMHEMGTSLEALAKKYGGTTGRLDDEEEADPIPEPLSNYLDAQYYGAISIGTPAQPFNVVFDTGSSNLWVPSKKCPITNIACLLHKKYDSTKSSTYTANGTDFKITYGSGALDGFLSTDDVIIAGATVKQQTFAEAMHEPGIAFVAAKFDGILGMGYPGISVDQVEPVFFTMVDQKIVDQPVFSFYLNRDANASVGGELILGGSDPQYYVEPXTYVDVDKKGYWQFKMD	0.51	1.43
	TS14, 12, 16, 17	EZ762184	contig23128:964:1796:1|similar to Lysosomal aspartic protease (Q03168)|Evalue: 2e-79	98	30587	2	14.8	277	5.88	MKLALVLVAIVLLLGAIDARRKTSRSHRHTTNDRLKRISLHKMQSVRRQMHEMGTSLEALAKKYGGTTGRLDDEEEADPIPEPLSNYLDAQYYGAISIGTPAQPFNVVFDTGSSNLWVPSKKCPITNIACLLHKKYDSTKSSTYTANGTDFKITYGSGALDGFLSTDDVIIAGATVKQQTFAEAMHEPGIAFVAAKFDGILGMGYPGISVDQVEPVFFTMVDQKIVDQPVFSFYLNRDANASVGGELILGGSDPQYYVEPXTYVDVDKKGYWQFKMD	0.23	0.8
	AS14, 13	EZ761923	contig21771:1:424:2|similar to Lysosomal aspartic protease (Q03168)|Evalue: 3e-48	236	15072	5 (4)	43.6	140	4.4	MDVDGKETDLCPGGCEAIADTGTSLIAGPTAQAQKLNEMIGATPYMSGEYVVDCSKIDSLPDVSFVLAGKSFTLKGRDYVLQVAQGAQTMCISGFMGIDVPTPLGPLWILGDVFIGKYYTEFDAGKDRVGFAEVKTPSRN	1.76	2.6
	TS13, 19	EZ761923	contig21771:1:424:2|similar to Lysosomal aspartic protease (Q03168)|Evalue: 3e-48	104	15072	3 (2)	15	140	4.4	MDVDGKETDLCPGGCEAIADTGTSLIAGPTAQAQKLNEMIGATPYMSGEYVVDCSKIDSLPDVSFVLAGKSFTLKGRDYVLQVAQGAQTMCISGFMGIDVPTPLGPLWILGDVFIGKYYTEFDAGKDRVGFAEVKTPSRN	0.5	0.73
	AS12, 11, 15-17	EZ761636	contig20004:1:1020:2|similar to Lysosomal aspartic protease (Q03168)|Evalue: 6e-121	350	37010	8 (6)	25.4	339	4.74	TDHGNNVQSLMQKYASLAEAEDYKKEGPIPVPERLMNYLDAQYYGDITLGTPPQPFRVVFDTGSSNLWVPSTKCSFLDIACLLHNKYDAKKSSTYSANGTEFEIHYGTGSLSGFLSTDNMGIGGVSVENQTFAEAVKQPGIVFVAAKFDGILGMAYPRISVQGVRPPFYNMIDQNLVPKAVFSFYLSRDPNATVGGEIILGGSDDDYYVAPFAYSKVTKKGYWQFKMEPSEXGGKNFGACESGCEAIADTGTSLLAGPSDEVREINSAIGAXTFLSGEYIIDCDRIQSLPDIAFVIGGKPFVLKGPEYILQVSQMGKTICLSGFVGIDVPPPLGPLWIL	0.82	1.83
	EES11, 10, 14, 15, 19, 20	EZ761636	contig20004:1:1020:2|similar to Lysosomal aspartic protease (Q03168)|Evalue: 6e-121	489	37010	13 (8)	39.2	339	4.74	TDHGNNVQSLMQKYASLAEAEDYKKEGPIPVPERLMNYLDAQYYGDITLGTPPQPFRVVFDTGSSNLWVPSTKCSFLDIACLLHNKYDAKKSSTYSANGTEFEIHYGTGSLSGFLSTDNMGIGGVSVENQTFAEAVKQPGIVFVAAKFDGILGMAYPRISVQGVRPPFYNMIDQNLVPKAVFSFYLSRDPNATVGGEIILGGSDDDYYVAPFAYSKVTKKGYWQFKMEPSEXGGKNFGACESGCEAIADTGTSLLAGPSDEVREINSAIGAXTFLSGEYIIDCDRIQSLPDIAFVIGGKPFVLKGPEYILQVSQMGKTICLSGFVGIDVPPPLGPLWIL	1.36	2.43
	TS12, 13, 16, 17	EZ761636	contig20004:1:1020:2|similar to Lysosomal aspartic protease (Q03168)|Evalue: 6e-121	350	37010	10 (7)	27.4	339	4.74	TDHGNNVQSLMQKYASLAEAEDYKKEGPIPVPERLMNYLDAQYYGDITLGTPPQPFRVVFDTGSSNLWVPSTKCSFLDIACLLHNKYDAKKSSTYSANGTEFEIHYGTGSLSGFLSTDNMGIGGVSVENQTFAEAVKQPGIVFVAAKFDGILGMAYPRISVQGVRPPFYNMIDQNLVPKAVFSFYLSRDPNATVGGEIILGGSDDDYYVAPFAYSKVTKKGYWQFKMEPSEXGGKNFGACESGCEAIADTGTSLLAGPSDEVREINSAIGAXTFLSGEYIIDCDRIQSLPDIAFVIGGKPFVLKGPEYILQVSQMGKTICLSGFVGIDVPPPLGPLWIL	0.82	1.73
Peptidase C1 family (thiol proteases)
	AS17, 10, 18	EZ760283	contig08207:1:819:1|similar to Putative cysteine proteinase CG12163 (Q9VN93)|Evalue: 8e-83	270	30361	5 (4)	20.2	272	5.89	MKRAYLLQATEQGTGVYGPTQFADRTYAEFKRHATGLSLSGELSRPKNAQTTDMNEEDLPDEFDWRTKGVVTNVKNQGQCGSCWAFSTTGNIEGIWALKKGKLLSLSEQELVDCDKMDQGCGGGLMTNAYKAIIQLGGLESESKYPYEGSDEKCQFKTENVVVYINGSVNISTDETEIAKWLVKNGPISIGINANAMMYYFGGVSHPWKVVCSPKNLDHGVLIVGYGKDGTKPYWIVKNSWGPHWGSKGYYLVYRGDGTCGLNLMCTSAVVE	0.68	0.9
	EES15, 10, 14-16	EZ760283	contig08207:1:819:1|similar to Putative cysteine proteinase CG12163 (Q9VN93)|Evalue: 8e-83	65	30361	1	4.8	272	5.89	MKRAYLLQATEQGTGVYGPTQFADRTYAEFKRHATGLSLSGELSRPKNAQTTDMNEEDLPDEFDWRTKGVVTNVKNQGQCGSCWAFSTTGNIEGIWALKKGKLLSLSEQELVDCDKMDQGCGGGLMTNAYKAIIQLGGLESESKYPYEGSDEKCQFKTENVVVYINGSVNISTDETEIAKWLVKNGPISIGINANAMMYYFGGVSHPWKVVCSPKNLDHGVLIVGYGKDGTKPYWIVKNSWGPHWGSKGYYLVYRGDGTCGLNLMCTSAVVE	0.11	0.44
	TS17, 10, 18	EZ760283	contig08207:1:819:1|similar to Putative cysteine proteinase CG12163 (Q9VN93)|Evalue: 8e-83	301	30361	6 (5)	23.5	272	5.89	MKRAYLLQATEQGTGVYGPTQFADRTYAEFKRHATGLSLSGELSRPKNAQTTDMNEEDLPDEFDWRTKGVVTNVKNQGQCGSCWAFSTTGNIEGIWALKKGKLLSLSEQELVDCDKMDQGCGGGLMTNAYKAIIQLGGLESESKYPYEGSDEKCQFKTENVVVYINGSVNISTDETEIAKWLVKNGPISIGINANAMMYYFGGVSHPWKVVCSPKNLDHGVLIVGYGKDGTKPYWIVKNSWGPHWGSKGYYLVYRGDGTCGLNLMCTSAVVE	0.86	1.32
	AS14, 13-15	EZ761053	contig17318:1:1144:2|similar to Cathepsin L (Q26636)|Evalue: 1e-33	245	41408	6 (5)	21.8	380	8.81	LISFYASLFRHAMGSSVLFLIVALFVVVRATTLEEDYAAFKKAAVLKFANSEIEEQFKQNFIQSYNITKQKGSLRAAGKRTFGTGYVPAVAIFGKARKLEGVPNADKPVTYGQVYPAPFEAPAGLTIPAKLDWREQGAVNPAPNQGQCNNCYMFTGAAVLEAQMKLRTGKLPKFSEQYLRDCLWTSQFTSNKVKSCPPPGASATNVYQFASVAPLLLNNEYEAYHVNDGNEGTCKLQTSKGQKVDVTDIVVIQNDESKMLKALVAIGPLAAAINSQGISASAPGQGVYSASCSKSVDHAVTLIGFGTDPKGGDYWLVRNSWGPTWNGDGTFKLKRGVNQCGIGNEASFPCIGGKCSAPSPFVKTRKLEPVLPEAVTSDEE	0.47	1
	TS14, 13-15	EZ761053	contig17318:1:1144:2|similar to Cathepsin L (Q26636)|Evalue: 1e-33	404	41408	11 (7)	23.9	380	8.81	LISFYASLFRHAMGSSVLFLIVALFVVVRATTLEEDYAAFKKAAVLKFANSEIEEQFKQNFIQSYNITKQKGSLRAAGKRTFGTGYVPAVAIFGKARKLEGVPNADKPVTYGQVYPAPFEAPAGLTIPAKLDWREQGAVNPAPNQGQCNNCYMFTGAAVLEAQMKLRTGKLPKFSEQYLRDCLWTSQFTSNKVKSCPPPGASATNVYQFASVAPLLLNNEYEAYHVNDGNEGTCKLQTSKGQKVDVTDIVVIQNDESKMLKALVAIGPLAAAINSQGISASAPGQGVYSASCSKSVDHAVTLIGFGTDPKGGDYWLVRNSWGPTWNGDGTFKLKRGVNQCGIGNEASFPCIGGKCSAPSPFVKTRKLEPVLPEAVTSDEE	0.85	1.19
	AS13, 13-18	EZ760250	contig07935:1:901:2|similar to Cathepsin L1 (P06797)|Evalue: 2e-25	286	33562	8 (5)	18.1	299	8.87	PLSHLSKEEKKQGLFGLKPRPNKNKGNKTRKMSNRIPGKPVDDEWANWLPFPGEPANNPRPAAMDWLGMGKVNTPGYTQNPCGSCWAFAGAAVIESHYLLRYGKPIKLSEQFIRDCAFDGNYATSSIVPCEGAYLETAMQLASEAPIPSITDYPYQLDDRQRKCPLGKPGYKLDITGIARVEGEAEMMAALRTVGPLVVAMDADEIAQDPQWFNWNGQNPNVYPGQRCTANTNHAVTLIGYGTDAKYGPYWTIRNSWGPKWGNKGTFKIPRGRCGIDYGVYPCFANQCHHGKIILQASG	0.76	1.38
	TS13, 13-16	EZ760250	contig07935:1:901:2|similar to Cathepsin L1 (P06797)|Evalue: 2e-25	312	33562	12 (6)	20.4	299	8.87	PLSHLSKEEKKQGLFGLKPRPNKNKGNKTRKMSNRIPGKPVDDEWANWLPFPGEPANNPRPAAMDWLGMGKVNTPGYTQNPCGSCWAFAGAAVIESHYLLRYGKPIKLSEQFIRDCAFDGNYATSSIVPCEGAYLETAMQLASEAPIPSITDYPYQLDDRQRKCPLGKPGYKLDITGIARVEGEAEMMAALRTVGPLVVAMDADEIAQDPQWFNWNGQNPNVYPGQRCTANTNHAVTLIGYGTDAKYGPYWTIRNSWGPKWGNKGTFKIPRGRCGIDYGVYPCFANQCHHGKIILQASG	0.76	1.3
	AS13, 13-15	EZ760036	contig06371:1:683:1|similar to Cathepsin L1 (P07154)|Evalue: 1e-16	390	25435	10 (9)	41.4	227	9.21	GQMGKRINGIAHLSKAERRKKLFGLVKTKKGGTTRKLPNRGWGGKPVQDAYQFTRFPGDASNSRIETVDWRTKGVVNTPPSQNPCGSCYVFAGVAVMEAQYMLRKKQKVKLSEQYIRDCVYDPRFSDITRTPCDGGTLMSAFMLASAIQIPSEADVPYQQDETPRPCNLRRGYSINVTDIVEVQGDEAMMAALRAVGPLAISMDASELGDDWNQWDGVNPPVFTPTR	1.68	3.33
	TS14, 13, 16	EZ760036	contig06371:1:683:1|similar to Cathepsin L1 (P07154)|Evalue: 1e-16	366	25435	17 (9)	41.4	227	9.21	GQMGKRINGIAHLSKAERRKKLFGLVKTKKGGTTRKLPNRGWGGKPVQDAYQFTRFPGDASNSRIETVDWRTKGVVNTPPSQNPCGSCYVFAGVAVMEAQYMLRKKQKVKLSEQYIRDCVYDPRFSDITRTPCDGGTLMSAFMLASAIQIPSEADVPYQQDETPRPCNLRRGYSINVTDIVEVQGDEAMMAALRAVGPLAISMDASELGDDWNQWDGVNPPVFTPTR	2.44	3.94
	AS12, 16-18	EZ759270	contig02046:1:1025:3|similar to Cathepsin L (Q26636)|Evalue: 1e-34	62	37859	2 (1)	2.1	340	8.89	LQLSGGCEAEQKKIFLQIYVQSQKPKNQLKRTNKPPVGMAINTHSHMTDEEFSKVALGLRRIETNSADMSARKLKEVKPGKPVQPTFXSSKFKAPPNMPSLPKSLDWRTYRAVQQTVEQAPCGSCYIFTGVAVLESQYFLRTAKRVKLSEQFVRDCIYSPEYSDISGDSCQGGDPANVFQLAGAVGLTPAKEYPYHYDNLTHSCPPPTHALSINVTNIGMAVGEEDIMRALVAVGPLAAGMDATELASKXLESIDGKTPSVYIGRNCSSTRTNHAVLLIGYGTDAKYGDYWLIRNSWGPKWGADGTFKMSRGRNTCAIGNRAEWPCIDGLCYPPKTPITV	0.18	0.63
	TS13	EZ759011	contig00607:21:1139:3|similar to Cathepsin L1 (P06797)|Evalue: 5e-39	63	41681	2	4	372	8.23	MKSVSILALAVLCAGFCHAFDDTDLWEEYKESHNLHLEGEAEEHARQNFFANVNKVAQNKKDQVRRTNKPKIGMRLNSHSHMSDAEFAKGALGYNPVPRKSAGTRKLQEADPGRAVQDQYYDESFKAPTTLKLPLSFDWRTYGAVNPSDNQSPCGSCFIFTGVAALESQYFLRTGRKVKLSEQHVRDCVFSTAFTKSPKDSCEGGDPANVWQMAGVTGLLQAANYPYQRDESRRNCPAARGQTISINVTNIGTAEGEREIMKALVTVGPLAAGMDATELSQEWAGYDGVTPPIFTARSCSTTRTNHAVLLIGYGTDKRIGDYWIIRNSWGSDWGSEGTFRMPRGRNHCAIGLLAKWPCIDGSCYLARNPAFG	0.16	0.16
	AS16, 15-17	EZ761179	contig17881:1:101:3|similar to Cathepsin B (P07688)|Evalue: 8e-08	84	3565	2 (1)	53.1	32	4.44	NEDWGDKGMFKILRGSDECGIESEITAGLPKI	1.07	3.21
	EES15, 12-15	EZ761179	contig17881:1:101:3|similar to Cathepsin B (P07688)|Evalue: 8e-08	74	3565	2 (1)	53.1	32	4.44	NEDWGDKGMFKILRGSDECGIESEITAGLPKI	1.07	4.28
	TS16, 15-17	EZ761179	contig17881:1:101:3|similar to Cathepsin B (P07688)|Evalue: 8e-08	89	3565	2 (1)	53.1	32	4.44	NEDWGDKGMFKILRGSDECGIESEITAGLPKI	1.07	3.21
	AS19, 13, 14, 16-19	EZ761099	contig17572:1:760:3|similar to Cathepsin L1 (Q9GKL8)|Evalue: 1e-59	149	28921	2	11.9	252	6.64	SFSLAKSTTFAXAFLLHYCLLKKTDAFNALNMYRSLLFVGLFLGSYAALIPENEDSKNEDAGILFDWERFKSFHGKEYGDNLETTRKRIYLRNCAKIVKHNEEYARGLHSYALEMNHYGDYDSKEFVRILNGLQNVNESQASSRITFMTPHFFAPPKTLDWRIKGYVTPVKNQGHCGSCWAFSATGALEGQTFRKTGKLPDLSEQNLVDCSKKYGNDGCNGGLMDQAFEYVKDNKGLDTESAYPYEANDGKC	0.24	1.05
	EES12, 13, 15-17	EZ761099	contig17572:1:760:3|similar to Cathepsin L1 (Q9GKL8)|Evalue: 1e-59	385	28921	10 (6)	32.9	252	6.64	SFSLAKSTTFAXAFLLHYCLLKKTDAFNALNMYRSLLFVGLFLGSYAALIPENEDSKNEDAGILFDWERFKSFHGKEYGDNLETTRKRIYLRNCAKIVKHNEEYARGLHSYALEMNHYGDYDSKEFVRILNGLQNVNESQASSRITFMTPHFFAPPKTLDWRIKGYVTPVKNQGHCGSCWAFSATGALEGQTFRKTGKLPDLSEQNLVDCSKKYGNDGCNGGLMDQAFEYVKDNKGLDTESAYPYEANDGKC	1.14	2.73
	TS19, 13, 14, 17-19	EZ761099	contig17572:1:760:3|similar to Cathepsin L1 (Q9GKL8)|Evalue: 1e-59	219	28921	5 (3)	14.7	252	6.64	SFSLAKSTTFAXAFLLHYCLLKKTDAFNALNMYRSLLFVGLFLGSYAALIPENEDSKNEDAGILFDWERFKSFHGKEYGDNLETTRKRIYLRNCAKIVKHNEEYARGLHSYALEMNHYGDYDSKEFVRILNGLQNVNESQASSRITFMTPHFFAPPKTLDWRIKGYVTPVKNQGHCGSCWAFSATGALEGQTFRKTGKLPDLSEQNLVDCSKKYGNDGCNGGLMDQAFEYVKDNKGLDTESAYPYEANDGKC	0.39	1.66
	AS16, 14-17	EZ761229	contig18129:136:1026:1|similar to Cathepsin Z (P05689)|Evalue: 2e-100	548	33940	13 (9)	37.2	296	6.58	MKLFILITCLVISCAESKKHRGGCYDKSFDRHVKHVKTQPRPHHYLGTENIPESWDWRNVNGVNYCSPTRNQHIPVYCGSCWAMGTTSSLADRINIARKGAWPSTYLSPQNVIDCGNAGTCHGGGGLAVFEYAHKKGIPDETCNNYQAIDQPCKTFNQCGTCSEFGKCYVVQNYTLWKVGDFGPISGREKMQLEIWKKGPIACGIAVTEKFDAYTGGVYEEYNPSAGINHILSIVGWGVEHDTGVEYWIGRNSWGEPWGEHGYFRIVTSKYKNGQGDDYNLQVESDCAYADPIVPY	1.11	2.16
	EES14, 13-17	EZ761229	contig18129:136:1026:1|similar to Cathepsin Z (P05689)|Evalue: 2e-100	455	33940	18 (8)	36.8	296	6.58	MKLFILITCLVISCAESKKHRGGCYDKSFDRHVKHVKTQPRPHHYLGTENIPESWDWRNVNGVNYCSPTRNQHIPVYCGSCWAMGTTSSLADRINIARKGAWPSTYLSPQNVIDCGNAGTCHGGGGLAVFEYAHKKGIPDETCNNYQAIDQPCKTFNQCGTCSEFGKCYVVQNYTLWKVGDFGPISGREKMQLEIWKKGPIACGIAVTEKFDAYTGGVYEEYNPSAGINHILSIVGWGVEHDTGVEYWIGRNSWGEPWGEHGYFRIVTSKYKNGQGDDYNLQVESDCAYADPIVPY	1.31	3.57
	TS16, 15-18	EZ761229	contig18129:136:1026:1|similar to Cathepsin Z (P05689)|Evalue: 2e-100	553	33940	16 (9)	37.2	296	6.58	MKLFILITCLVISCAESKKHRGGCYDKSFDRHVKHVKTQPRPHHYLGTENIPESWDWRNVNGVNYCSPTRNQHIPVYCGSCWAMGTTSSLADRINIARKGAWPSTYLSPQNVIDCGNAGTCHGGGGLAVFEYAHKKGIPDETCNNYQAIDQPCKTFNQCGTCSEFGKCYVVQNYTLWKVGDFGPISGREKMQLEIWKKGPIACGIAVTEKFDAYTGGVYEEYNPSAGINHILSIVGWGVEHDTGVEYWIGRNSWGEPWGEHGYFRIVTSKYKNGQGDDYNLQVESDCAYADPIVPY	1.54	3.01
	AS13, 12-19	EZ761273	contig18366:49:1152:1|similar to Cathepsin K (O35186)|Evalue: 3e-31	864	41584	29 (17)	53.1	367	8.48	MKLTLLFVLAFALFASCYCDDGQWEQYKDKHGLTYDDESKEAEHKANFLKQLKLVEDSKTQSQTRGNKDNLIMRKITHLSHLSKAEKKQNLLGLIPEASKATRKLKPQAGQKLVNDYFGSYEKFPGEPAAGYVKPDSLDWTTRGAMTPLTYSQNPCGSCWAFTGVAVLEAQYKLRYNKQIKLSEEFVRDCAYDKRWSDVTRPGCKGGHLFTVYQLASEVAIPSADAYPYIEDDKPHACKVTAGTQFNITGIARVDGDEEMMKALRTVGPIGVTMDADEIMDDKWFGWDGKNPSIMVPRTCTTTVNHAVTLIGYGTEGGVPYWLIRNSWGPNWANKGTFKIKRGTCGITYGVYPCIDGKCTLGRNVLG	2.96	8.29
	TS14, 12-14, 16	EZ761273	contig18366:49:1152:1|similar to Cathepsin K (O35186)|Evalue: 3e-31	940	41584	35 (17)	42.8	367	8.48	MKLTLLFVLAFALFASCYCDDGQWEQYKDKHGLTYDDESKEAEHKANFLKQLKLVEDSKTQSQTRGNKDNLIMRKITHLSHLSKAEKKQNLLGLIPEASKATRKLKPQAGQKLVNDYFGSYEKFPGEPAAGYVKPDSLDWTTRGAMTPLTYSQNPCGSCWAFTGVAVLEAQYKLRYNKQIKLSEEFVRDCAYDKRWSDVTRPGCKGGHLFTVYQLASEVAIPSADAYPYIEDDKPHACKVTAGTQFNITGIARVDGDEEMMKALRTVGPIGVTMDADEIMDDKWFGWDGKNPSIMVPRTCTTTVNHAVTLIGYGTEGGVPYWLIRNSWGPNWANKGTFKIKRGTCGITYGVYPCIDGKCTLGRNVLG	2.96	5.3
	AS13, 14	EZ761741	contig20534:85:1134:1|similar to Cathepsin L1 (Q28944)|Evalue: 8e-51	165	38434	3	14	349	6.69	MHYAVVLGAFCVLICTATANPSSAIPSPCDFAEFMKKWEKTYNSQAEQDKANATYTAHCNEANLHNNQQNTMRAAGDQGFQQSENGFSDLTNDQFIKQHTGYVFQNRSATQTRAAAFDCSFNPTIPNVNLPATYDARSQGLVNTPQHQGSCGDCYAFSATGSIEAAYKKKTGQLINLSEQQIASCSQAEGNHGCNGGNQPNAFAYVRSKGLELENDYPYSARMGNLASCLYSAPKATIKIAGCADHQRRSSADIQKLLVQYGPLAAVIDASGSPFQQYRSGIYKSATCGNSFQAVNHAVLLVGYGSEAGKDYWIVKNSWGTSWGEGGYFKIGRGSNQCGIELDVSYATM	0.28	0.46
	TS14, 13	EZ761741	contig20534:85:1134:1|similar to Cathepsin L1 (Q28944)|Evalue: 8e-51	125	38434	2	10.3	349	6.69	MHYAVVLGAFCVLICTATANPSSAIPSPCDFAEFMKKWEKTYNSQAEQDKANATYTAHCNEANLHNNQQNTMRAAGDQGFQQSENGFSDLTNDQFIKQHTGYVFQNRSATQTRAAAFDCSFNPTIPNVNLPATYDARSQGLVNTPQHQGSCGDCYAFSATGSIEAAYKKKTGQLINLSEQQIASCSQAEGNHGCNGGNQPNAFAYVRSKGLELENDYPYSARMGNLASCLYSAPKATIKIAGCADHQRRSSADIQKLLVQYGPLAAVIDASGSPFQQYRSGIYKSATCGNSFQAVNHAVLLVGYGSEAGKDYWIVKNSWGTSWGEGGYFKIGRGSNQCGIELDVSYATM	0.18	0.27
	AS13, 14, 16	EZ762300	contig23569:1:798:1|similar to Cathepsin L2 (O60911)|Evalue: 7e-27	578	29673	15 (10)	49.4	265	8.84	SGKTRKLKDTIAGKPIDDYGPRKYAAFTAGSARDTGAVDLMATGMVQTPAYKQDPCGSCWAFTGIAVLEAHYFLRKGKKVKLSEQYVRDCAYDRKYYAASQPRQSCDGAFLYTVFQLASEAAIPETTAYPYIADEQQRQCPPSIKSLHNINVTDIVRVDGDDKMMAALRSVGPLAVSMNADEIANSNEWFFWDGLKPSVYVPKSCPSQVNHAVTLVGYGTDAKLGPYWLIRNSWGPTWANKGTFKIKRGTCGISYGLYPCIDGKC	2.22	4.65
	TS13, 14, 16	EZ762300	contig23569:1:798:1|similar to Cathepsin L2 (O60911)|Evalue: 7e-27	553	29673	16 (11)	47.5	265	8.84	SGKTRKLKDTIAGKPIDDYGPRKYAAFTAGSARDTGAVDLMATGMVQTPAYKQDPCGSCWAFTGIAVLEAHYFLRKGKKVKLSEQYVRDCAYDRKYYAASQPRQSCDGAFLYTVFQLASEAAIPETTAYPYIADEQQRQCPPSIKSLHNINVTDIVRVDGDDKMMAALRSVGPLAVSMNADEIANSNEWFFWDGLKPSVYVPKSCPSQVNHAVTLVGYGTDAKLGPYWLIRNSWGPTWANKGTFKIKRGTCGISYGLYPCIDGKC	2.59	4.17
	AS20, 19	EZ762292	contig23523:1:350:3|similar to Cathepsin L (Q95029)|Evalue: 2e-46	77	12510	2 (1)	12.2	115	4.61	GVGAKDSGFVDIEEGSEQKLMEAIASVGPVSIAIDASHESFQFYSKGVYDEKECSSEDLDHGVLAVGYGSDENGKDFWIVKNSWGTEWGDGGYIKMVRNKKNQCGVASKASYPIV	0.27	0.54
	EES16, 12, 13, 17	EZ762292	contig23523:1:350:3|similar to Cathepsin L (Q95029)|Evalue: 2e-46	112	12510	2	24.3	115	4.61	GVGAKDSGFVDIEEGSEQKLMEAIASVGPVSIAIDASHESFQFYSKGVYDEKECSSEDLDHGVLAVGYGSDENGKDFWIVKNSWGTEWGDGGYIKMVRNKKNQCGVASKASYPIV	0.62	1.78
	TS19, 17, 20	EZ762292	contig23523:1:350:3|similar to Cathepsin L (Q95029)|Evalue: 2e-46	123	12510	3 (2)	35.7	115	4.61	GVGAKDSGFVDIEEGSEQKLMEAIASVGPVSIAIDASHESFQFYSKGVYDEKECSSEDLDHGVLAVGYGSDENGKDFWIVKNSWGTEWGDGGYIKMVRNKKNQCGVASKASYPIV	0.62	1.16
	AS16,15	EZ761980	contig22183:1:112:2|similar to Cathepsin B-like cysteine proteinase 6 (P43510)|Evalue: 2e-08	36	4082	1	21.6	37	4.5	FGAVEAMSDRYCIASEGKVNVHVSAEDLVSCCSACGF	0.91	1.82
	AS13	EZ762515	contig24357:73:1197:1|similar to Cathepsin L (Q95029)|Evalue: 4e-34	257	42591	8 (6)	18.4	374	8.65	MNTILHTVLFVALVGFCYCKIATWEDYKTEYGLTYDDEDAEAVHRENFEKAQTLIKSNNQKGSTRAAGKEHISLKLNELAHLTKEEKLKGLFGLPKDSSTRISTRTLINKGNGKLVNRHYQFGKFPGEPKDYTKPKTLDWNARGAVQPSNYTQNPCNTCSIFTALAVLESQAFLREKKKIKLSEQFVRDCVLDPKYSDWGTDACAHGVYMDNVFQLASEVPIPTAAAVPYIQDRTLRPCKLQKGISFSNITDIVKVEGDEKMMEALRTVGPLATSLDATELAFDEKWSKWDGLNPAVYTSTKCDPKNQNHAVLLVGYGTDEKYGPYWLIRNSWGPTWGNKGLFKIKRGMCAIFDAFYPAINGEYTLGKDMMKKA	0.69	0.69
	TS13	EZ762515	contig24357:73:1197:1|similar to Cathepsin L (Q95029)|Evalue: 4e-34	298	42591	7 (5)	19.3	374	8.65	MNTILHTVLFVALVGFCYCKIATWEDYKTEYGLTYDDEDAEAVHRENFEKAQTLIKSNNQKGSTRAAGKEHISLKLNELAHLTKEEKLKGLFGLPKDSSTRISTRTLINKGNGKLVNRHYQFGKFPGEPKDYTKPKTLDWNARGAVQPSNYTQNPCNTCSIFTALAVLESQAFLREKKKIKLSEQFVRDCVLDPKYSDWGTDACAHGVYMDNVFQLASEVPIPTAAAVPYIQDRTLRPCKLQKGISFSNITDIVKVEGDEKMMEALRTVGPLATSLDATELAFDEKWSKWDGLNPAVYTSTKCDPKNQNHAVLLVGYGTDEKYGPYWLIRNSWGPTWGNKGLFKIKRGMCAIFDAFYPAINGEYTLGKDMMKKA	0.45	0.45
	AS16, 15-17	EZ762548	contig24433:1:1039:2|similar to Cathepsin L1 (Q9GL24)|Evalue: 2e-104	306	39191	9 (6)	26.7	345	5.28	THTNRCLYSTPSVFKMRAVLVLCLLAVVAVAWSKPNPNSEWEEWKETHGKEYETTQEEEHRRSIWENNLKMIQHHNLRHANGKESYHLGMNKYGDMTHDEFVKMMNGYVAADFDTSDRITYLSPANVEVPDAVDWRDKGYVTEVKDQGQCGSCWAFSATGSLEGQWFKKTGKLVSLSEQQLVDCSTEQGNEGCNGGLMDQAFQYIKDNDGIEGEKDYPYKARDQKCKYDAKKKAASDTGFVDIPSQNETALQEALATQGPISVAIDASNMSFQFYKGGIYDEKDCSSTELDHGVLAVGYGSKDKADYWIVKNSWGPSWGDKGYILMSRNKNNQCGIATAASYPTV	0.76	1.75
	TS16, 17	EZ762548	contig24433:1:1039:2|similar to Cathepsin L1 (Q9GL24)|Evalue: 2e-104	226	39191	10 (5)	19.1	345	5.28	THTNRCLYSTPSVFKMRAVLVLCLLAVVAVAWSKPNPNSEWEEWKETHGKEYETTQEEEHRRSIWENNLKMIQHHNLRHANGKESYHLGMNKYGDMTHDEFVKMMNGYVAADFDTSDRITYLSPANVEVPDAVDWRDKGYVTEVKDQGQCGSCWAFSATGSLEGQWFKKTGKLVSLSEQQLVDCSTEQGNEGCNGGLMDQAFQYIKDNDGIEGEKDYPYKARDQKCKYDAKKKAASDTGFVDIPSQNETALQEALATQGPISVAIDASNMSFQFYKGGIYDEKDCSSTELDHGVLAVGYGSKDKADYWIVKNSWGPSWGDKGYILMSRNKNNQCGIATAASYPTV	0.76	1.39
	AS13	EZ762643	contig24789:58:1104:1|similar to Cathepsin H (O46427)|Evalue: 1e-42	162	38823	4	11.2	348	8.43	MVRLVVACLFLAVFTVCSVGAAKSDQTSGRCDWESYKQKFDKHYADEEEEETAKATFEENCQHINAFSTRASKSSTVAVNKFATLSLDQFSSKHLGGVPKSAKKTRAGEDPCLVNFTPTKGLVLPASLDYRPKMTPVQNQSDPVSCGSCWTFAVMATVEGAYAKKTGKPAVTLATQQLLDCARMTDMLNGCDGGNAGFALKHLAQQKGIVAKAKYPYTAKQETCKAEKLELSPVHVKDCVELPKKNATAMQQALVMYGPLAGFVWATTKDFQFYKDGIYDPETCKKDKNEYVDHVISIVGYGTENGKDYWLVKNSHGSDWGKLGGYFKILRGKNTCGIENEVFAAIIA	0.39	0.39
	TS13, 14	EZ762643	contig24789:58:1104:1|similar to Cathepsin H (O46427)|Evalue: 1e-42	206	38823	3	10.9	348	8.43	MVRLVVACLFLAVFTVCSVGAAKSDQTSGRCDWESYKQKFDKHYADEEEEETAKATFEENCQHINAFSTRASKSSTVAVNKFATLSLDQFSSKHLGGVPKSAKKTRAGEDPCLVNFTPTKGLVLPASLDYRPKMTPVQNQSDPVSCGSCWTFAVMATVEGAYAKKTGKPAVTLATQQLLDCARMTDMLNGCDGGNAGFALKHLAQQKGIVAKAKYPYTAKQETCKAEKLELSPVHVKDCVELPKKNATAMQQALVMYGPLAGFVWATTKDFQFYKDGIYDPETCKKDKNEYVDHVISIVGYGTENGKDYWLVKNSHGSDWGKLGGYFKILRGKNTCGIENEVFAAIIA	0.28	0.46
	AS13, 17	EZ763172	contig27387:186:553:3|similar to Cathepsin B (P07858)|Evalue: 2e-21	99	14279	2	18.9	122	6.7	MRTLVVVLLIALCAVQSYDGRRNIGRKSKQVPLYQPMSDDMIEYINSIDTTWEAGRSYMDAMPLHQIKRMCGTILGGPRQKLYSHSKLQYEDIPDNFDSRDNWPDCPTIKEVRDQGACGSCW	0.53	0.77
	EES12, 13	EZ763172	contig27387:186:553:3|similar to Cathepsin B (P07858)|Evalue: 2e-21	123	14279	2	18.9	122	6.7	MRTLVVVLLIALCAVQSYDGRRNIGRKSKQVPLYQPMSDDMIEYINSIDTTWEAGRSYMDAMPLHQIKRMCGTILGGPRQKLYSHSKLQYEDIPDNFDSRDNWPDCPTIKEVRDQGACGSCW	0.53	0.77
	AS9, 16, 17	EZ763201	contig27566:1:597:1|similar to Cathepsin L (Q26636)|Evalue: 1e-48	139	21944	2	18.7	198	4.7	FGTTGTIEGALFVKTGKLVRLSEQNLMDCSWGFGDNGCDGGEEWRAYEWIMKHGGIATDESYGPYLGIDGRCHYNSSNTVIGAKIESYVNVTSGDEEALKTAIAVHGPVAVDIDAAHKSFSFYSHGVFYEPDCKNSPKDLDHAVLAVGYGELNGEPYWLIKNSWSTYWGDDGYVLMSRKDNNCGVTTDPTFVNIKVDA	0.33	0.81
	EES9, 8, 15	EZ763201	contig27566:1:597:1|similar to Cathepsin L (Q26636)|Evalue: 1e-48	139	21944	2	18.7	198	4.7	FGTTGTIEGALFVKTGKLVRLSEQNLMDCSWGFGDNGCDGGEEWRAYEWIMKHGGIATDESYGPYLGIDGRCHYNSSNTVIGAKIESYVNVTSGDEEALKTAIAVHGPVAVDIDAAHKSFSFYSHGVFYEPDCKNSPKDLDHAVLAVGYGELNGEPYWLIKNSWSTYWGDDGYVLMSRKDNNCGVTTDPTFVNIKVDA	0.33	0.81
	TS9, 16, 17	EZ763201	contig27566:1:597:1|similar to Cathepsin L (Q26636)|Evalue: 1e-48	98	21944	3	24.2	198	4.7	FGTTGTIEGALFVKTGKLVRLSEQNLMDCSWGFGDNGCDGGEEWRAYEWIMKHGGIATDESYGPYLGIDGRCHYNSSNTVIGAKIESYVNVTSGDEEALKTAIAVHGPVAVDIDAAHKSFSFYSHGVFYEPDCKNSPKDLDHAVLAVGYGELNGEPYWLIKNSWSTYWGDDGYVLMSRKDNNCGVTTDPTFVNIKVDA	0.53	1.21
	AS16, 13-18	EZ763260	contig27905:1:454:1|similar to Cathepsin B (P10605)|Evalue: 6e-53	180	16750	10 (3)	25.8	151	5.84	GCDGGFPGSAWEFWVKHGLVSGGNYGSNEGCRPYTIQSCEHHVNGSLPPCGPTQNTPKCEQKCEKSFNGTYKQDEHFGSKSYSVSSDVKQIQTEIMKNGPVEAAFTVYADFPSYKSGVYKHESGAELGGHAVKIIGWGVEESTPYWLVVNS	2.01	4.03
	EES14, 12-15	EZ763260	contig27905:1:454:1|similar to Cathepsin B (P10605)|Evalue: 6e-53	71	16750	2 (1)	8.6	151	5.84	GCDGGFPGSAWEFWVKHGLVSGGNYGSNEGCRPYTIQSCEHHVNGSLPPCGPTQNTPKCEQKCEKSFNGTYKQDEHFGSKSYSVSSDVKQIQTEIMKNGPVEAAFTVYADFPSYKSGVYKHESGAELGGHAVKIIGWGVEESTPYWLVVNS	0.2	1.28
	TS16, 15-17	EZ763260	contig27905:1:454:1|similar to Cathepsin B (P10605)|Evalue: 6e-53	184	16750	9 (3)	26.5	151	5.84	GCDGGFPGSAWEFWVKHGLVSGGNYGSNEGCRPYTIQSCEHHVNGSLPPCGPTQNTPKCEQKCEKSFNGTYKQDEHFGSKSYSVSSDVKQIQTEIMKNGPVEAAFTVYADFPSYKSGVYKHESGAELGGHAVKIIGWGVEESTPYWLVVNS	1.51	3.04
	AS13, 14	EZ759513	contig03308:1:1170:1|similar to Crustapain (Q86GF7)|Evalue: 8e-31	209	42912	7 (4)	14.4	389	8.04	ESLFRLTNRISTEMKFLLLVTFSVAFVAVVLANDDAKWEQFKAENHLELSGSEDXEGKANFIKHLKEVEQNGNSGLHRSANHVSTGVNSHSHLSPEEIREXTAKGLQEAREKSHSERQLVQPDKSKPVQPSYYPESWTEPKGLPSPLPVNFDWRTYGAVQDTADQSPCGCCFVFSGVATLXXVNTFLRTGKKVKLSEEYVRNCLFTSKFATNPKDSCQGGDPLNVYQLAAFTGIPQASAFPFTRTETAKQCPSAGSSLTQINVTGIAIAAGELQIQKALLAAGPLAASMDATELSNPPWSSYNGVSPSVYKSNTCSKSSTNHAITLIGYGENAVDGKYWLYRNSWGTSWGAKGTFKMPRGNNACASELKAKWPCIDGTCYLPKNPAFSG	0.56	1.12
	TS14, 13	EZ759513	contig03308:1:1170:1|similar to Crustapain (Q86GF7)|Evalue: 8e-31	163	42912	4	14.1	389	8.04	ESLFRLTNRISTEMKFLLLVTFSVAFVAVVLANDDAKWEQFKAENHLELSGSEDXEGKANFIKHLKEVEQNGNSGLHRSANHVSTGVNSHSHLSPEEIREXTAKGLQEAREKSHSERQLVQPDKSKPVQPSYYPESWTEPKGLPSPLPVNFDWRTYGAVQDTADQSPCGCCFVFSGVATLXXVNTFLRTGKKVKLSEEYVRNCLFTSKFATNPKDSCQGGDPLNVYQLAAFTGIPQASAFPFTRTETAKQCPSAGSSLTQINVTGIAIAAGELQIQKALLAAGPLAASMDATELSNPPWSSYNGVSPSVYKSNTCSKSSTNHAITLIGYGENAVDGKYWLYRNSWGTSWGAKGTFKMPRGNNACASELKAKWPCIDGTCYLPKNPAFSG	0.35	0.6
	AS14, 13-15	EZ761876	contig21432:22:1311:1|similar to Crustapain (Q86GF7)|Evalue: 7e-34	546	49307	18 (9)	28.9	429	9	MTAVCSLRISSIKVNRSSFKNILFFDLSITVIESASSKESNXKKRLPQRKASVATLPLLSKMKLILCVLFAFAVFACCSCDDDKEWQIYKKENNLKYNTEEEEQSHKENYLETKQFIEEHKSKSQTRAGGEKVVLKLHGLSHLSKEERVKTLTGLAKNAGTRRLNNNRVPGKPVDNRGPVRYASLPAETASAMVNRDFVDWNARGAVITPSYSQNPCQTCWDFTGMAVLEAQYFLRTGKKVKLSEQFVRDCVYDPRYAATPGRPCDPAYLFTAYQLASEAAIPLAQEYPYMDDQFVRQCPVGMRGIMFNITDMVRPQGDEEMMRALRIYGPIGIAMDANELINSREWFNWNGISPSIYMPRTCSTQPNHAVTLIGYGTENGIKYWLIRNSWGPTWANNG…	1.32	2.32
	TS14, 13-16	EZ761876	contig21432:22:1311:1|similar to Crustapain (Q86GF7)|Evalue: 7e-34	657	49307	21 (9)	27.7	429	9	MTAVCSLRISSIKVNRSSFKNILFFDLSITVIESASSKESNXKKRLPQRKASVATLPLLSKMKLILCVLFAFAVFACCSCDDDKEWQIYKKENNLKYNTEEEEQSHKENYLETKQFIEEHKSKSQTRAGGEKVVLKLHGLSHLSKEERVKTLTGLAKNAGTRRLNNNRVPGKPVDNRGPVRYASLPAETASAMVNRDFVDWNARGAVITPSYSQNPCQTCWDFTGMAVLEAQYFLRTGKKVKLSEQFVRDCVYDPRYAATPGRPCDPAYLFTAYQLASEAAIPLAQEYPYMDDQFVRQCPVGMRGIMFNITDMVRPQGDEEMMRALRIYGPIGIAMDANELINSREWFNWNGISPSIYMPRTCSTQPNHAVTLIGYGTENGIKYWLIRNSWGPTWANNG…	1.04	1.88
	EES9, 8	EZ763200	contig27565:1:203:3|seems to belong to peptidase C1 family|Best-hit: Cysteine proteinase 2 (Q05094)|Evalue: 4e-07	140	7557	4 (3)	47.8	67	6.92	KVNHLADRSDDEISSLRGRLYSGQPNNGLPFNKHVYGDKVVPDSIDWRLYGAVTPVKDQAICGSCWS	3.65	4.12
	AS11	EZ759035	contig00737:121:1632:1|similar to Uncharacterized peptidase C1-like protein F26E4.3 (P90850)|Evalue: 5e-96	377	58300	7	15.5	503	8.7	MSRFSRNRRLFLCKSQLARHVLHSRNDNCSVPIDGTYCYCDDFCDRRGVDDFGDXFPDYYVYCKGQLSPVTSSPVTTTRRTPLQTQGCIVDGITHASGSTFKRNCNQCACDYSPDSSSQGLVSCTQDVCLIREDLIEQINANSGILGWQATSYPAFLWTDIEEWDXLYRLGTLKPERLVSSMHEIKIDVNEILPARFDARTRWPNFIQGIEDQGNCGASWAFSTTELASDRLAIMTKGQTNVRLSPQHLLSCNKNSQMGCEGGHLDRAWWFLRKRGVVSEACYPYTSGQTNRSETCFVSSVDFIXXFLDCPSGSVDTTVYAATPPYRIAQNEEEIMFEILRNGPVQAVFRVYPDFYMYKSGVYRRSNFFMSAPKEYQETGYHSIRIIGWGIDYTAGNPT…	0.39	0.39
	TS11, 10	EZ759035	contig00737:121:1632:1|similar to Uncharacterized peptidase C1-like protein F26E4.3 (P90850)|Evalue: 5e-96	339	58300	7 (6)	14.9	503	8.7	MSRFSRNRRLFLCKSQLARHVLHSRNDNCSVPIDGTYCYCDDFCDRRGVDDFGDXFPDYYVYCKGQLSPVTSSPVTTTRRTPLQTQGCIVDGITHASGSTFKRNCNQCACDYSPDSSSQGLVSCTQDVCLIREDLIEQINANSGILGWQATSYPAFLWTDIEEWDXLYRLGTLKPERLVSSMHEIKIDVNEILPARFDARTRWPNFIQGIEDQGNCGASWAFSTTELASDRLAIMTKGQTNVRLSPQHLLSCNKNSQMGCEGGHLDRAWWFLRKRGVVSEACYPYTSGQTNRSETCFVSSVDFIXXFLDCPSGSVDTTVYAATPPYRIAQNEEEIMFEILRNGPVQAVFRVYPDFYMYKSGVYRRSNFFMSAPKEYQETGYHSIRIIGWGIDYTAGNPT…	0.47	0.53
peptidase M12A family	AS11, 10	EZ760715	contig11988:1:1216:2|similar to Zinc metalloproteinase nas-14 (Q19269)|Evalue: 3e-27	359	46234	6	17.8	404	8.4	SAESAVVRSTGPTTVKTKTCSPNSFDADRPETFPRTKSIDITPEQEKALNASLQQLNGTVFQGDLRGIDIERTKKDKKIHYLDANKKASANSDVTERWPNGRVTYYIYKNQFNDTQKKQIRDAMDLLSSVSFVRFVEWRSPDVHHLAIINTKTTCQSSYLGFRGAPQSLELGFFDPKPGKKDPQTCFIAPGTIVHELLHALGFGHEQTRLDRDDYIKINWPNIKPDMLGNFVAYAGSDNYGLPYDFKSIMHYDFNFFAVNPLSWTILPKDNNVTVKLQRLGGEELTRDDIKMINIMYPGCAILHEGVFRDLPRIYMINGTQIDEIKNNNLLSSSVTYGCTLTICDSTCLSGKCVSFTSSGRDVRQNITLMEDFGISWTGNPWVNPKSAKCICKPWNRNN…	0.51	0.74
	EES10, 9	EZ760715	contig11988:1:1216:2|similar to Zinc metalloproteinase nas-14 (Q19269)|Evalue: 3e-27	343	46234	10 (9)	28.2	404	8.4	SAESAVVRSTGPTTVKTKTCSPNSFDADRPETFPRTKSIDITPEQEKALNASLQQLNGTVFQGDLRGIDIERTKKDKKIHYLDANKKASANSDVTERWPNGRVTYYIYKNQFNDTQKKQIRDAMDLLSSVSFVRFVEWRSPDVHHLAIINTKTTCQSSYLGFRGAPQSLELGFFDPKPGKKDPQTCFIAPGTIVHELLHALGFGHEQTRLDRDDYIKINWPNIKPDMLGNFVAYAGSDNYGLPYDFKSIMHYDFNFFAVNPLSWTILPKDNNVTVKLQRLGGEELTRDDIKMINIMYPGCAILHEGVFRDLPRIYMINGTQIDEIKNNNLLSSSVTYGCTLTICDSTCLSGKCVSFTSSGRDVRQNITLMEDFGISWTGNPWVNPKSAKCICKPWNRNN…	0.86	1.37
	TS11, 10	EZ760715	contig11988:1:1216:2|similar to Zinc metalloproteinase nas-14 (Q19269)|Evalue: 3e-27	163	46234	4 (3)	7.7	404	8.4	SAESAVVRSTGPTTVKTKTCSPNSFDADRPETFPRTKSIDITPEQEKALNASLQQLNGTVFQGDLRGIDIERTKKDKKIHYLDANKKASANSDVTERWPNGRVTYYIYKNQFNDTQKKQIRDAMDLLSSVSFVRFVEWRSPDVHHLAIINTKTTCQSSYLGFRGAPQSLELGFFDPKPGKKDPQTCFIAPGTIVHELLHALGFGHEQTRLDRDDYIKINWPNIKPDMLGNFVAYAGSDNYGLPYDFKSIMHYDFNFFAVNPLSWTILPKDNNVTVKLQRLGGEELTRDDIKMINIMYPGCAILHEGVFRDLPRIYMINGTQIDEIKNNNLLSSSVTYGCTLTICDSTCLSGKCVSFTSSGRDVRQNITLMEDFGISWTGNPWVNPKSAKCICKPWNRNN…	0.23	0.3
	AS18, 17	EZ759589	contig03632:189:869:3|similar to Zinc metalloproteinase nas-14 (Q19269)|Evalue: 8e-29	104	25974	2	16.4	226	9.32	MRALLIIAFVTSLWLSLCTAQRNALPNKWSAGIVPYVLGKKFSNADLKAILEAFPLIQKDTCIKFIPRTNQTSYVEIILGLECQSNIGRVGGRQVVTLSRDKCMDRRGILRQLMHVLGFYDEHTRIDRDDSIIVNLNNIKEDERFLFNKNPKTVQSTFQLPYDFDSVLQVPFDHKVDPKAEANAWTIRPKKSGQGMARSRDLTNLDIQKLNAFYTTADCAPIKSVQ	0.27	0.27
	TS18, 17	EZ759589	contig03632:189:869:3|similar to Zinc metalloproteinase nas-14 (Q19269)|Evalue: 8e-29	140	25974	2	11.1	226	9.32	MRALLIIAFVTSLWLSLCTAQRNALPNKWSAGIVPYVLGKKFSNADLKAILEAFPLIQKDTCIKFIPRTNQTSYVEIILGLECQSNIGRVGGRQVVTLSRDKCMDRRGILRQLMHVLGFYDEHTRIDRDDSIIVNLNNIKEDERFLFNKNPKTVQSTFQLPYDFDSVLQVPFDHKVDPKAEANAWTIRPKKSGQGMARSRDLTNLDIQKLNAFYTTADCAPIKSVQ	0.27	0.54
	AS12	EZ759737	contig04515:1:928:3|similar to Zinc metalloproteinase nas-4 (P55112)|Evalue: 8e-38	368	34830	7 (6)	37	308	5.23	DTKDSGCKPDNLEDPALADPDGDKSEGLPAHEEDEGVTKIEGDIVGIDLSGSEAELATQSNALTDESKRWPTKGDIIEVPYTFWPGVKPELQKTVRAAMNGIQDNTCIRFVKRSSQKDYIKITSALSGCWSNVGKTGGEQRISLQTPGCGSYGTAQHELMHALGLFHEQSRTDRDQYVTINWDNIKPDDAKNFKSYSSAEVTHFKQPYDFASIMHYGPTYFAINEKVPTIKPVEKYKAWYKKLGQREYLSDIDIEKLNLMYKCGERKRAWPGWDFNMGADVFVIESNNGIECRAKCKETEGCGAVVIA	0.89	0.89
	EES11	EZ759737	contig04515:1:928:3|similar to Zinc metalloproteinase nas-4 (P55112)|Evalue: 8e-38	90	34830	2	8.1	308	5.23	DTKDSGCKPDNLEDPALADPDGDKSEGLPAHEEDEGVTKIEGDIVGIDLSGSEAELATQSNALTDESKRWPTKGDIIEVPYTFWPGVKPELQKTVRAAMNGIQDNTCIRFVKRSSQKDYIKITSALSGCWSNVGKTGGEQRISLQTPGCGSYGTAQHELMHALGLFHEQSRTDRDQYVTINWDNIKPDDAKNFKSYSSAEVTHFKQPYDFASIMHYGPTYFAINEKVPTIKPVEKYKAWYKKLGQREYLSDIDIEKLNLMYKCGERKRAWPGWDFNMGADVFVIESNNGIECRAKCKETEGCGAVVIA	0.2	0.2
	TS12	EZ759737	contig04515:1:928:3|similar to Zinc metalloproteinase nas-4 (P55112)|Evalue: 8e-38	322	34830	7	39.3	308	5.23	DTKDSGCKPDNLEDPALADPDGDKSEGLPAHEEDEGVTKIEGDIVGIDLSGSEAELATQSNALTDESKRWPTKGDIIEVPYTFWPGVKPELQKTVRAAMNGIQDNTCIRFVKRSSQKDYIKITSALSGCWSNVGKTGGEQRISLQTPGCGSYGTAQHELMHALGLFHEQSRTDRDQYVTINWDNIKPDDAKNFKSYSSAEVTHFKQPYDFASIMHYGPTYFAINEKVPTIKPVEKYKAWYKKLGQREYLSDIDIEKLNLMYKCGERKRAWPGWDFNMGADVFVIESNNGIECRAKCKETEGCGAVVIA	0.89	0.89
	AS14, 13	EZ760955	contig16482:45:1196:3|similar to Zinc metalloproteinase nas-13 (Q20191)|Evalue: 1e-31	237	42310	7 (6)	14.6	383	7.62	MNCFLGALAILLLTISVTETFVDGAVVRPAVTLRRTAVEQLVAQARSFDNLSNGVSDAAPEKQPELFEGDIAGIDIAHLIKSHQVRQVNPRNGITNTGQRWYGGAVYYAISSAFTAAEQNLIKSAIGEFSKTAALGFYPRTDQRNYINIQRGARNSGCWAYIGMIGGAQQVNLEPNYGNNGHCMHHSIIVHELNHAVGFYHEQARTDRDQYVEINRNNIPSGQMHNFDSHGASIITHFSQPYDYGSLMHYEWNAFAINPSVWTIRGKGANQNVKLGNNKGLTAVDIRKIDAMYPLCGKLFTDANQKGTYVVFSKGVEYGAFGGSIQNAMSSAFVTTGCKITMCKQGGMGGDCAVLQATANANYWNNFGDFGWNDSVNSAKCTC	0.57	0.65
	TS14	EZ760955	contig16482:45:1196:3|similar to Zinc metalloproteinase nas-13 (Q20191)|Evalue: 1e-31	175	42310	4 (3)	9.4	383	7.62	MNCFLGALAILLLTISVTETFVDGAVVRPAVTLRRTAVEQLVAQARSFDNLSNGVSDAAPEKQPELFEGDIAGIDIAHLIKSHQVRQVNPRNGITNTGQRWYGGAVYYAISSAFTAAEQNLIKSAIGEFSKTAALGFYPRTDQRNYINIQRGARNSGCWAYIGMIGGAQQVNLEPNYGNNGHCMHHSIIVHELNHAVGFYHEQARTDRDQYVEINRNNIPSGQMHNFDSHGASIITHFSQPYDYGSLMHYEWNAFAINPSVWTIRGKGANQNVKLGNNKGLTAVDIRKIDAMYPLCGKLFTDANQKGTYVVFSKGVEYGAFGGSIQNAMSSAFVTTGCKITMCKQGGMGGDCAVLQATANANYWNNFGDFGWNDSVNSAKCTC	0.25	0.25
	AS15, 15-17	EZ760097	contig06816:345:1322:3|similar to Zinc metalloproteinase nas-14 (Q19269)|Evalue: 3e-45	233	35942	5	20.3	325	8.74	MLKLLLTITQIILLVITLTNARTISKRAAPQDWRDYLTPDAINYGLKDGDQAEGQALFEGDIKGIDVIKGNKEALGQLAQNAVTDKSMLWPNGVVPYIFGSGLSSRQQSVIETALQDMMSKTCVKFVRRSNQQDYIRFVNRNQGCSSYVARTGGAQDVDLQEGCLTYNGEVQHEVMHALGFFHEQSRNDRDSFVTIVWDNIKPGMDDQFDKYRSDLLNLPYDYDSIMHYGWNYFARDRAAPTIVPKQKSKSIGNRKVLSSTDVDKINRLYSCSGRPASPSAGSTNSKPVSSGSSGSSGSSPTTTSSSKGGFLSSLLGLFKNIIVG	0.55	0.94
	TS15, 16	EZ760097	contig06816:345:1322:3|similar to Zinc metalloproteinase nas-14 (Q19269)|Evalue: 3e-45	189	35942	6 (4)	17.8	325	8.74	MLKLLLTITQIILLVITLTNARTISKRAAPQDWRDYLTPDAINYGLKDGDQAEGQALFEGDIKGIDVIKGNKEALGQLAQNAVTDKSMLWPNGVVPYIFGSGLSSRQQSVIETALQDMMSKTCVKFVRRSNQQDYIRFVNRNQGCSSYVARTGGAQDVDLQEGCLTYNGEVQHEVMHALGFFHEQSRNDRDSFVTIVWDNIKPGMDDQFDKYRSDLLNLPYDYDSIMHYGWNYFARDRAAPTIVPKQKSKSIGNRKVLSSTDVDKINRLYSCSGRPASPSAGSTNSKPVSSGSSGSSGSSPTTTSSSKGGFLSSLLGLFKNIIVG	0.42	0.61
	AS17, 16-18	EZ760026	contig06299:302:959:2|similar to Zinc metalloproteinase nas-8 (Q18439)|Evalue: 8e-27	120	25879	3	13.7	219	5.23	MLPIWTQGVVDTDRRWPKDTETQEAVIPYVISLDFDASEKEFLENEMKLFDYDTCIGFRERKYGDDDYIYFEMTRNSTCSSDIGRTGNRQDIELNGCLDSQRVQRLLMYTIGFYPEHQRPDRDEFIKINWSNIKEENAHNFVKLPASDVTTFKLTYDFMSITHFPRNAFAVNEKEWTIRPTDKYANTQFGTGTRLSSKDLEKINVMYTAKSKGTLRYTG	0.44	0.7
	TS17, 18	EZ760026	contig06299:302:959:2|similar to Zinc metalloproteinase nas-8 (Q18439)|Evalue: 8e-27	88	25879	2	9.6	219	5.23	MLPIWTQGVVDTDRRWPKDTETQEAVIPYVISLDFDASEKEFLENEMKLFDYDTCIGFRERKYGDDDYIYFEMTRNSTCSSDIGRTGNRQDIELNGCLDSQRVQRLLMYTIGFYPEHQRPDRDEFIKINWSNIKEENAHNFVKLPASDVTTFKLTYDFMSITHFPRNAFAVNEKEWTIRPTDKYANTQFGTGTRLSSKDLEKINVMYTAKSKGTLRYTG	0.27	0.4
	AS9	EZ759891	contig05485:134:1203:2|similar to Zinc metalloproteinase nas-14 (Q19269)|Evalue: 4e-39	315	40866	6	16.6	356	6.54	MRSTPVFPALLLLLALSDGKTVEKREIPSDWKNYLTPEALAQLTDSKEAGTQDTYEGDMLGIDPATGMQKGKVRNALTSKNLLWTDGVMPYEFASDFPLDQQTVVLNAMKDMSSKTCIKFPQHTDEKNWITFRKSQSGCNSYVGKAGKGNQFVNLEDYCIQQIGRTQHEIMHALGFFHEQSRNDRDNYINIIWENIAAGKKPQFDTRKGDVQALPYDYESIMHYSWRAFAKNNSLPTIIPKRQANMGQREKMSVLDMERINKLYNCPVLSPPVTAAIVASTTWRPETQNNNCDVYGGGTRCGCYGGWCWSYLSFNASKEEWCYTQIEGAAAGLKNWANCTKDSQCSWTMTCGSENF	0.6	0.6
	TS9	EZ759891	contig05485:134:1203:2|similar to Zinc metalloproteinase nas-14 (Q19269)|Evalue: 4e-39	351	40866	6 (5)	22.2	356	6.54	MRSTPVFPALLLLLALSDGKTVEKREIPSDWKNYLTPEALAQLTDSKEAGTQDTYEGDMLGIDPATGMQKGKVRNALTSKNLLWTDGVMPYEFASDFPLDQQTVVLNAMKDMSSKTCIKFPQHTDEKNWITFRKSQSGCNSYVGKAGKGNQFVNLEDYCIQQIGRTQHEIMHALGFFHEQSRNDRDNYINIIWENIAAGKKPQFDTRKGDVQALPYDYESIMHYSWRAFAKNNSLPTIIPKRQANMGQREKMSVLDMERINKLYNCPVLSPPVTAAIVASTTWRPETQNNNCDVYGGGTRCGCYGGWCWSYLSFNASKEEWCYTQIEGAAAGLKNWANCTKDSQCSWTMTCGSENF	0.6	0.6
	AS13	EZ759383	contig02629:233:1093:2|similar to Zinc metalloproteinase nas-14 (Q19269)|Evalue: 3e-31	73	31982	2	12.5	287	5	MLLLFSSLIFLTFAGVTWTAPVSSSPLGKYPVHCRNLTAEGRLSDPSCGATAIKPVLAADAEAEGNSDATSATNATQSLADPELDPENFEGDILGIDVGARMPQQGASNNAVLEENKRWPNAVVPFEVDEKFTVSEVAQILEAMDWISERTCVQFVPRSNEHEDYVSFIVYKGCSSYVGKIKGRQMIGYNQQGCFTLGKLQHEIMHALGFYHEQSRMDRDQYVQINRGNIQPEATDNFQIFSSTAFNFPYDYGSAMHYPVYGFAINPSIPVIQAKAPHQSETRKIGQ	0.22	0.22
	AS18	EZ762929	contig25998:1:296:3|similar to Embryonic protein UVS.2 (P42664)|Evalue: 8e-06	260	11194	14 (6)	59.8	97	9.71	ADRDEYVSINFDNLNGINRKKFEKIPKSAYDTSKLGAYDYNSITHFPNKVYAIDKNVWTMKSKRDSSRPLGNTKLSSGDYEKIRRAYNCGPRTGNRA	10.17	10.17
	EES16	EZ762929	contig25998:1:296:3|similar to Embryonic protein UVS.2 (P42664)|Evalue: 8e-06	177	11194	12 (4)	52.6	97	9.71	ADRDEYVSINFDNLNGINRKKFEKIPKSAYDTSKLGAYDYNSITHFPNKVYAIDKNVWTMKSKRDSSRPLGNTKLSSGDYEKIRRAYNCGPRTGNRA	5.53	5.53
	TS18, 17	EZ762929	contig25998:1:296:3|similar to Embryonic protein UVS.2 (P42664)|Evalue: 8e-06	198	11194	9 (4)	43.3	97	9.71	ADRDEYVSINFDNLNGINRKKFEKIPKSAYDTSKLGAYDYNSITHFPNKVYAIDKNVWTMKSKRDSSRPLGNTKLSSGDYEKIRRAYNCGPRTGNRA	4	4.71
	TS9, 10	EZ759743	contig04549:156:1202:3|similar to Embryonic protein UVS.2 (P42664)|Evalue: 8e-09	73	37549	1	4.3	348	8.3	MFVNPYGFLFYFLLIAAIKATVLTPFNGRPESGVPVRSAINRDSRYGVWPNPTRILYRLDPAYTTAQQTMIVTAMNQVSSDVGSCVRFVAYNAATDTGTDNIYISPTLNNGVSPVTCFSFPGRLIRQAGAGQKLVIFGGTNGCMDTIRDIMKYFVIVLGVRNEYNRPDRNTYMQVFTQNLRPELTGLNIFNQYTATQVDYLNTAFDYCSVTIPAATKYAISGTVVYTFLAATTFSLQNRLSQGDCVGIALQYTGCNFAACADTCGLNNFASTAAPVVTVTAATATTSTGSTSTTATTTGTGSTTTLAPTTTNTASTTTNTASTTTNTASTTTGQPAEVTQCANPLAGC	0.09	0.18
peptidase M13 family.	AS8	EZ759607	contig03758:710:1808:2|similar to Neprilysin-1 (Q18673)|Evalue: 5e-45	155	41738	3	10.1	366	6.11	MTLXDILQRVFXXNRSQLARFFPRYLQKIFENNKAKYDVQDNLQIYVISPXKFRIFDNWLLDIEKQGDMGKRRLVNYLAXKFVGAFSESTSQSLKTLVNDHDRLXXPAQRENKARWKECSTMVVNALSSAVSSMYVMKYVERGTKTKMTQMISDLKQSFREMLLDASWMDAETREAALKKLDSMAQYVVYPDFLIHNVSKIDDYYKISNIPNSLFEATVLLRHVAELTQFAKWGKAKTAEDAALDINTADINAFYDQSNNMIVILAGILHYPMFDVGSPDYVNYGGIGYVIGHEITHGFDDAGAKFDETGNMRDWWTAASKQLYDQRGATISAQYSQFQTPYGTVNGNLTLGENIADNAGLEAAFR	0.26	0.26
	TS8, 19	EZ759607	contig03758:710:1808:2|similar to Neprilysin-1 (Q18673)|Evalue: 5e-45	88	41738	2	6.6	366	6.11	MTLXDILQRVFXXNRSQLARFFPRYLQKIFENNKAKYDVQDNLQIYVISPXKFRIFDNWLLDIEKQGDMGKRRLVNYLAXKFVGAFSESTSQSLKTLVNDHDRLXXPAQRENKARWKECSTMVVNALSSAVSSMYVMKYVERGTKTKMTQMISDLKQSFREMLLDASWMDAETREAALKKLDSMAQYVVYPDFLIHNVSKIDDYYKISNIPNSLFEATVLLRHVAELTQFAKWGKAKTAEDAALDINTADINAFYDQSNNMIVILAGILHYPMFDVGSPDYVNYGGIGYVIGHEITHGFDDAGAKFDETGNMRDWWTAASKQLYDQRGATISAQYSQFQTPYGTVNGNLTLGENIADNAGLEAAFR	0.16	0.24
	AS7, 6	EZ761437	contig19059:1:2293:2|similar to Neprilysin-2 (O16796)|Evalue: 2e-108	492	87708	11 (10)	16.3	763	6.31	QKWTLRRPVLVVEDYPKKKSNTGTKVIGAIIFILLCTTIAFAVLYFMPPTPAEEVKPNEICMTKGCVEAAGLLVQNMNRQVDPCDNFYDFACGNWNKTNPIPDDKGRWGVFDILRTQLSRNVREALETVSTASDNEAIRKARGYYAQCFNETIIDNAGIKDFQKHFNEFFENKADNWPFLSTSTDAEVPTTDELKRALMFARKYQMTLGFLNNGLATNSYKPSENMISFGSPVFGLSRGDLTSNTTSDQRDAYLTYMTELSTEYQKQVQNVSQLNTSTAYQDIFRDILNLEINLAKQTLNDVDRRNVSLSKINMTMGEFIDKYQPRLLDTGFWQRYFEGAWPGFKFDISSLINVGDTGYYNYTKVITDEKGDFDLATRRMIANWMGLRFVERYAPRLNR…	0.44	0.52
	TS7	EZ761437	contig19059:1:2293:2|similar to Neprilysin-2 (O16796)|Evalue: 2e-108	266	87708	5	8	763	6.31	QKWTLRRPVLVVEDYPKKKSNTGTKVIGAIIFILLCTTIAFAVLYFMPPTPAEEVKPNEICMTKGCVEAAGLLVQNMNRQVDPCDNFYDFACGNWNKTNPIPDDKGRWGVFDILRTQLSRNVREALETVSTASDNEAIRKARGYYAQCFNETIIDNAGIKDFQKHFNEFFENKADNWPFLSTSTDAEVPTTDELKRALMFARKYQMTLGFLNNGLATNSYKPSENMISFGSPVFGLSRGDLTSNTTSDQRDAYLTYMTELSTEYQKQVQNVSQLNTSTAYQDIFRDILNLEINLAKQTLNDVDRRNVSLSKINMTMGEFIDKYQPRLLDTGFWQRYFEGAWPGFKFDISSLINVGDTGYYNYTKVITDEKGDFDLATRRMIANWMGLRFVERYAPRLNR…	0.2	0.2
	AS7, 6	EZ761464	contig19161:1:1557:1|similar to Neprilysin-2 (O16796)|Evalue: 2e-87	244	59307	4	12.4	518	6.01	NKTRVAYMKLMENLTMIYAQEIGAPLPHNLSAELQKIMDFEMYLSNATFTEEEKRSPYLLRNLMTFDDFAKGYLSQTFNSSDFFEAVKATPFNATVRQNITRNMTINVNHPAFYKVLDKKLAELMSSEEGRRFLATYLGWRIFLSSADTLSSVYRKSSLQFRKVSSGVSEEPPRWRTCVSYANEGLGLAVGSIFVQHYFGKEAKEKLMSLINDIRDVYSQILDETSWMDEVTRIRAKKKLNNMVRYIGYADFLLDDVPRLDAYYASFEPTAVHFENDQRMSAMLNGKDQEELIKPATRNLDETIAPAVVNAYYYPQKNMLAFLAGILQPTFFHKDYPEYLSYASIGQVFGHEITHGFDDQGSLYDEDGRLDNWWSNTSRANYMERAHQIALQYSNFSTL…	0.24	0.48
	EES6	EZ761464	contig19161:1:1557:1|similar to Neprilysin-2 (O16796)|Evalue: 2e-87	242	59307	6 (5)	12	518	6.01	NKTRVAYMKLMENLTMIYAQEIGAPLPHNLSAELQKIMDFEMYLSNATFTEEEKRSPYLLRNLMTFDDFAKGYLSQTFNSSDFFEAVKATPFNATVRQNITRNMTINVNHPAFYKVLDKKLAELMSSEEGRRFLATYLGWRIFLSSADTLSSVYRKSSLQFRKVSSGVSEEPPRWRTCVSYANEGLGLAVGSIFVQHYFGKEAKEKLMSLINDIRDVYSQILDETSWMDEVTRIRAKKKLNNMVRYIGYADFLLDDVPRLDAYYASFEPTAVHFENDQRMSAMLNGKDQEELIKPATRNLDETIAPAVVNAYYYPQKNMLAFLAGILQPTFFHKDYPEYLSYASIGQVFGHEITHGFDDQGSLYDEDGRLDNWWSNTSRANYMERAHQIALQYSNFSTL…	0.31	0.31
	TS7, 6	EZ761464	contig19161:1:1557:1|similar to Neprilysin-2 (O16796)|Evalue: 2e-87	213	59307	5 (4)	11.4	518	6.01	NKTRVAYMKLMENLTMIYAQEIGAPLPHNLSAELQKIMDFEMYLSNATFTEEEKRSPYLLRNLMTFDDFAKGYLSQTFNSSDFFEAVKATPFNATVRQNITRNMTINVNHPAFYKVLDKKLAELMSSEEGRRFLATYLGWRIFLSSADTLSSVYRKSSLQFRKVSSGVSEEPPRWRTCVSYANEGLGLAVGSIFVQHYFGKEAKEKLMSLINDIRDVYSQILDETSWMDEVTRIRAKKKLNNMVRYIGYADFLLDDVPRLDAYYASFEPTAVHFENDQRMSAMLNGKDQEELIKPATRNLDETIAPAVVNAYYYPQKNMLAFLAGILQPTFFHKDYPEYLSYASIGQVFGHEITHGFDDQGSLYDEDGRLDNWWSNTSRANYMERAHQIALQYSNFSTL…	0.24	0.35
peptidase M10A family	AS12, 18, 19	EZ762740	contig25188:72:1790:3|similar to Matrix metalloproteinase-16 (P51512)|Evalue: 5e-54	411	64356	8	17.5	572	8.46	MCERSSLLRIFSIIFLFTALCPQYGAASADPGLGDAIREVYQGAKDFGRRIYHAFKAKATNFLQKFGYMRSSNPESEYTPSEDTFKDSIKTFQRFYKLEQTGEIDESTKNMMETPRCAVPDNIPPEYDGSNLQHHRQKRYVVLSGYKWKRRDLKWRINKYTQKLDRSIVDGAFTKAFQAWSEVTPFEITYKADGPVHLDIQFKPQDGPGGTLAYAHPPGPGAGGDMRFDELEQWTVRTAEGTNLYQVAIHEIGHTLGLDHSDNRASVMFPAYTGYVRGIKLAPDDVAGIQTIYGSKTAPKTQAEVDASSGRSTSVKLGRTSGGGSVFGGSTGGKIAGGLIGILGKLFNPFGAARRQQMAMIYGGDACSSSNTHMLDGITITQDGSTYAFKGQHYFQLKD…	0.49	0.94
	EES17, 16, 20	EZ762740	contig25188:72:1790:3|similar to Matrix metalloproteinase-16 (P51512)|Evalue: 5e-54	91	64356	2	4.9	572	8.46	MCERSSLLRIFSIIFLFTALCPQYGAASADPGLGDAIREVYQGAKDFGRRIYHAFKAKATNFLQKFGYMRSSNPESEYTPSEDTFKDSIKTFQRFYKLEQTGEIDESTKNMMETPRCAVPDNIPPEYDGSNLQHHRQKRYVVLSGYKWKRRDLKWRINKYTQKLDRSIVDGAFTKAFQAWSEVTPFEITYKADGPVHLDIQFKPQDGPGGTLAYAHPPGPGAGGDMRFDELEQWTVRTAEGTNLYQVAIHEIGHTLGLDHSDNRASVMFPAYTGYVRGIKLAPDDVAGIQTIYGSKTAPKTQAEVDASSGRSTSVKLGRTSGGGSVFGGSTGGKIAGGLIGILGKLFNPFGAARRQQMAMIYGGDACSSSNTHMLDGITITQDGSTYAFKGQHYFQLKD…	0.1	0.25
	TS12	EZ762740	contig25188:72:1790:3|similar to Matrix metalloproteinase-16 (P51512)|Evalue: 5e-54	663	64356	18 (14)	31.5	572	8.46	MCERSSLLRIFSIIFLFTALCPQYGAASADPGLGDAIREVYQGAKDFGRRIYHAFKAKATNFLQKFGYMRSSNPESEYTPSEDTFKDSIKTFQRFYKLEQTGEIDESTKNMMETPRCAVPDNIPPEYDGSNLQHHRQKRYVVLSGYKWKRRDLKWRINKYTQKLDRSIVDGAFTKAFQAWSEVTPFEITYKADGPVHLDIQFKPQDGPGGTLAYAHPPGPGAGGDMRFDELEQWTVRTAEGTNLYQVAIHEIGHTLGLDHSDNRASVMFPAYTGYVRGIKLAPDDVAGIQTIYGSKTAPKTQAEVDASSGRSTSVKLGRTSGGGSVFGGSTGGKIAGGLIGILGKLFNPFGAARRQQMAMIYGGDACSSSNTHMLDGITITQDGSTYAFKGQHYFQLKD…	1.11	1.11
Peptidase C56 family
MF chaperone	AS19	EZ761334	contig18650:1:487:1|similar to Protein DJ-1 (Q5E946)|Evalue: 3e-31	214	17579	5	36.4	162	8.63	EGREMSFASNLVGRLLIGPSTFLSRLTCSRDLSVLSKMLSSKKALVILAEGAEEMEVTMSVDMLRRGDIKVTLAGLNSAEAVKCARDTWIKPDASLKDVWKEKAFDVVLLPGGNKGSENLCNDKLVGEILKSQEQNGIIAAVCAGPTALKAHNIAKGKTVTC	1.41	1.41
	EES17, 18	EZ761334	contig18650:1:487:1|similar to Protein DJ-1 (Q5E946)|Evalue: 3e-31	181	17579	4	27.8	162	8.63	EGREMSFASNLVGRLLIGPSTFLSRLTCSRDLSVLSKMLSSKKALVILAEGAEEMEVTMSVDMLRRGDIKVTLAGLNSAEAVKCARDTWIKPDASLKDVWKEKAFDVVLLPGGNKGSENLCNDKLVGEILKSQEQNGIIAAVCAGPTALKAHNIAKGKTVTC	1.02	1.72
	TS19	EZ761334	contig18650:1:487:1|similar to Protein DJ-1 (Q5E946)|Evalue: 3e-31	162	17579	4 (3)	22.2	162	8.63	EGREMSFASNLVGRLLIGPSTFLSRLTCSRDLSVLSKMLSSKKALVILAEGAEEMEVTMSVDMLRRGDIKVTLAGLNSAEAVKCARDTWIKPDASLKDVWKEKAFDVVLLPGGNKGSENLCNDKLVGEILKSQEQNGIIAAVCAGPTALKAHNIAKGKTVTC	0.7	0.7
	AS19	EZ763236	contig27778:718:913:2|similar to Protein DJ-1 (Q5E946)|Evalue: 8e-08	245	7363	4 (3)	56.2	64	6.78	HSAKDKMASDYIWKDERVVQDGKLITSQGPGTCFEFAFKIIEEVYDGNDGRTKVEQIKKAIVFK	2.27	2.27
	EES17, 18	EZ763236	contig27778:718:913:2|similar to Protein DJ-1 (Q5E946)|Evalue: 8e-08	97	7363	1	25	64	6.78	HSAKDKMASDYIWKDERVVQDGKLITSQGPGTCFEFAFKIIEEVYDGNDGRTKVEQIKKAIVFK	0.48	0.96
	TS19	EZ763236	contig27778:718:913:2|similar to Protein DJ-1 (Q5E946)|Evalue: 8e-08	246	7363	4 (3)	56.2	64	6.78	HSAKDKMASDYIWKDERVVQDGKLITSQGPGTCFEFAFKIIEEVYDGNDGRTKVEQIKKAIVFK	2.27	2.27
peptidase M1 family	AS7, 5, 8	EZ760153	contig07181:1:2433:1|similar to Puromycin-sensitive aminopeptidase (P55786)|Evalue: 0.0	872	93415	18 (16)	29.1	810	5.86	KLQDGTQLTSRDLQYHKEMERVVLEFERMLPLGSGQLNIKFTGLLNDKLRGFYRNTYTVNGEERVGACTQMEACFARQCFPCWDEPALKATFDITLVVPRHLVALSNMPIVSEKALESNDKWKVVEYAQTPIMSTYLVALVVGEFDFLEDKTEDGIVVRVYTPLGKREQGQFALDFATKTLPYYRHFFTLPYPLPKCDLIAVANFAMGAMENWGCITFRETALLIDPHNSSAASRQRVALVVGHELAHMWFGNIVTMEWWTDLWLNEGFASFVEHLSVENLYPEWKIWNQFVDDFFSRAMRLDSLRSSHPIEVVVGHPDEVEEIFDDISYEKGASVIRMLFHYLGEDGFRSGLSKYLKDFEYKNAKTTDLWRHLEAATNKPVAAIMGDWTGEKGYPMVS…	0.8	1.58
	EES7, 3, 4, 13	EZ760153	contig07181:1:2433:1|similar to Puromycin-sensitive aminopeptidase (P55786)|Evalue: 0.0	1207	93415	24 (19)	35.2	810	5.86	KLQDGTQLTSRDLQYHKEMERVVLEFERMLPLGSGQLNIKFTGLLNDKLRGFYRNTYTVNGEERVGACTQMEACFARQCFPCWDEPALKATFDITLVVPRHLVALSNMPIVSEKALESNDKWKVVEYAQTPIMSTYLVALVVGEFDFLEDKTEDGIVVRVYTPLGKREQGQFALDFATKTLPYYRHFFTLPYPLPKCDLIAVANFAMGAMENWGCITFRETALLIDPHNSSAASRQRVALVVGHELAHMWFGNIVTMEWWTDLWLNEGFASFVEHLSVENLYPEWKIWNQFVDDFFSRAMRLDSLRSSHPIEVVVGHPDEVEEIFDDISYEKGASVIRMLFHYLGEDGFRSGLSKYLKDFEYKNAKTTDLWRHLEAATNKPVAAIMGDWTGEKGYPMVS…	0.99	1.11
	TS8	EZ760153	contig07181:1:2433:1|similar to Puromycin-sensitive aminopeptidase (P55786)|Evalue: 0.0	835	93415	19 (14)	26.2	810	5.86	KLQDGTQLTSRDLQYHKEMERVVLEFERMLPLGSGQLNIKFTGLLNDKLRGFYRNTYTVNGEERVGACTQMEACFARQCFPCWDEPALKATFDITLVVPRHLVALSNMPIVSEKALESNDKWKVVEYAQTPIMSTYLVALVVGEFDFLEDKTEDGIVVRVYTPLGKREQGQFALDFATKTLPYYRHFFTLPYPLPKCDLIAVANFAMGAMENWGCITFRETALLIDPHNSSAASRQRVALVVGHELAHMWFGNIVTMEWWTDLWLNEGFASFVEHLSVENLYPEWKIWNQFVDDFFSRAMRLDSLRSSHPIEVVVGHPDEVEEIFDDISYEKGASVIRMLFHYLGEDGFRSGLSKYLKDFEYKNAKTTDLWRHLEAATNKPVAAIMGDWTGEKGYPMVS…	0.68	0.68
	AS6	EZ760571	contig10703:300:2318:3|similar to Aminopeptidase N (P97449)|Evalue: 1e-81	218	77581	4 (3)	6	672	5.32	MLYAMGANFSAPYAEFWPDKPPKLDQAAIPDFSAGAMENWGLVLYREANLLYTKGISSADNKRRIGAVIGHELAHMVFGNLLTCDWWSDTWLNEGFASYFEYELMKSSQPTDQWNIAKMFAYWETRTAMEPDSFDNAHALYNPDTYTTADIDTMFDSITYAKGAAILHMIRSVMGTXKFYAALKTYVNDFKTGNVMHKDLLARLNQEMGFSGAEDLRNRFDNWIEKKGYPVVTLRRDLNTNEVAVSQQRFVLASSAKDDTVWHVPLTLTTSATVAAQTDPTRVCWISEKETAKLSTTCKSLHDTIPAANLPDSYIIANIEQYGYYRVNYDQQNWDRIIRQLETDHTRIHVLNRAQLIDDMLNLARLPSTNAAYQKYATALRVTNYLGKELEAAPLLSAF…	0.13	0.49
	TS4, 6-8	EZ760571	contig10703:300:2318:3|similar to Aminopeptidase N (P97449)|Evalue: 1e-81	224	77581	5	8.9	672	5.32	MLYAMGANFSAPYAEFWPDKPPKLDQAAIPDFSAGAMENWGLVLYREANLLYTKGISSADNKRRIGAVIGHELAHMVFGNLLTCDWWSDTWLNEGFASYFEYELMKSSQPTDQWNIAKMFAYWETRTAMEPDSFDNAHALYNPDTYTTADIDTMFDSITYAKGAAILHMIRSVMGTXKFYAALKTYVNDFKTGNVMHKDLLARLNQEMGFSGAEDLRNRFDNWIEKKGYPVVTLRRDLNTNEVAVSQQRFVLASSAKDDTVWHVPLTLTTSATVAAQTDPTRVCWISEKETAKLSTTCKSLHDTIPAANLPDSYIIANIEQYGYYRVNYDQQNWDRIIRQLETDHTRIHVLNRAQLIDDMLNLARLPSTNAAYQKYATALRVTNYLGKELEAAPLLSAF…	0.23	0.49
peptidase M2 family.	AS8	EZ763275	contig28013:160:1255:1|similar to Angiotensin-converting enzyme (Q6Q4G4)|Evalue: 6e-53	166	42638	3	8.5	365	6.04	MWKLSIRLWLYCFGTVVLLLPPTDAYTVVNMDIPNYANSYFGDLRNLEKWVTQVYNPLAIKVYAAEGDAIWEYETNITDYNQNETLKAAEQTAQFTRKMAKVMVKFNITGTHNYTILRLHKEITELGHAALSSKELETLNNLISDMEAIYSKAKVCGDQTGRNCSQENMWTLDGEIAETLTKSRDPKILLYLWKSWRDNSGRLIRQKYIEYVALKNKAAKLNGYSDAGEMWRSDYVVQSLNYTDAQLLKDLDDLWLQIKPMYEQIHAYVXTETDNMYPKEQIRANGTIPAHLLGNMWAQSWDGLLNFTQLYPKKPLLDVTEEMKRQNYTVERMFKLSEKFQTDIGLKPMTGLFWNNTMFVRPNDT	0.25	0.25
	EES7, 3, 4	EZ763275	contig28013:160:1255:1|similar to Angiotensin-converting enzyme (Q6Q4G4)|Evalue: 6e-53	63	42638	2 (1)	3.3	365	6.04	MWKLSIRLWLYCFGTVVLLLPPTDAYTVVNMDIPNYANSYFGDLRNLEKWVTQVYNPLAIKVYAAEGDAIWEYETNITDYNQNETLKAAEQTAQFTRKMAKVMVKFNITGTHNYTILRLHKEITELGHAALSSKELETLNNLISDMEAIYSKAKVCGDQTGRNCSQENMWTLDGEIAETLTKSRDPKILLYLWKSWRDNSGRLIRQKYIEYVALKNKAAKLNGYSDAGEMWRSDYVVQSLNYTDAQLLKDLDDLWLQIKPMYEQIHAYVXTETDNMYPKEQIRANGTIPAHLLGNMWAQSWDGLLNFTQLYPKKPLLDVTEEMKRQNYTVERMFKLSEKFQTDIGLKPMTGLFWNNTMFVRPNDT	0.08	0.24
	TS8	EZ763275	contig28013:160:1255:1|similar to Angiotensin-converting enzyme (Q6Q4G4)|Evalue: 6e-53	116	42638	2	6.8	365	6.04	MWKLSIRLWLYCFGTVVLLLPPTDAYTVVNMDIPNYANSYFGDLRNLEKWVTQVYNPLAIKVYAAEGDAIWEYETNITDYNQNETLKAAEQTAQFTRKMAKVMVKFNITGTHNYTILRLHKEITELGHAALSSKELETLNNLISDMEAIYSKAKVCGDQTGRNCSQENMWTLDGEIAETLTKSRDPKILLYLWKSWRDNSGRLIRQKYIEYVALKNKAAKLNGYSDAGEMWRSDYVVQSLNYTDAQLLKDLDDLWLQIKPMYEQIHAYVXTETDNMYPKEQIRANGTIPAHLLGNMWAQSWDGLLNFTQLYPKKPLLDVTEEMKRQNYTVERMFKLSEKFQTDIGLKPMTGLFWNNTMFVRPNDT	0.16	0.16
	AS8	EZ762879	contig25784:1:381:2|similar to Angiotensin-converting enzyme (Q10751)|Evalue: 2e-40	77	14473	2	17.5	126	7.1	FREGANGGFHEAVGDTLALSVGTPKHLTLLNLLKNYKPDVENDLNFMFQTALDKIVFLPYGYIMDRYRYDVFSGKIPASKLNSGWWTYRNKYQGIHAPVTRSENDFDPGAKYHTAADVEYMRYFIS	0.53	0.53
	TS8	EZ762879	contig25784:1:381:2|similar to Angiotensin-converting enzyme (Q10751)|Evalue: 2e-40	75	14473	2	13.5	126	7.1	FREGANGGFHEAVGDTLALSVGTPKHLTLLNLLKNYKPDVENDLNFMFQTALDKIVFLPYGYIMDRYRYDVFSGKIPASKLNSGWWTYRNKYQGIHAPVTRSENDFDPGAKYHTAADVEYMRYFIS	0.53	0.53
	EES7, 6	EZ762712	contig25084:1:1521:2|similar to Angiotensin-converting enzyme (Q50JE5)|Evalue: 5e-133	529	58694	18 (10)	26.1	506	7.74	RSTQAQSENVTVQKLHKWITELGHAALTSKDLESLNNLINDMQGIYSKAKVCGDETGQNCTKDNMWTLDGQIAEAFLKSRDAEKLLHLWITWRGNTGTLMRYKYIDYVKLKNKAAKLNGYRDAGEMWRSNYVVKSMNYTDKQLLRDLDDLWLQIKPMYEQIHAYVRRKLIETYPKEQIRPNGTLPAHLLGNMWAQDWKGLLNFTQLYPDKPLLDVTEEMRRQNFTVERMFKLSEKFQTDIGLKPMTDLFWNNTMFVRPKDRREVVCHASAWDLFRPNDTRIKMCTEIRMEDFITIHHEMGHTQYXAAVPESTIPVREGANGGFHEAVGDTLALSVSTPKHLSLLELIKDYKQDNESDLNFMFATALDKIIFLPYAYIMDRYRYDVFSGKIPTTKLNSGW…	0.82	1.74
	AS7	EZ762583	contig24559:1:1096:3|similar to Angiotensin-converting enzyme (Q50JE5)|Evalue: 1e-118	108	41747	2	11	364	5.68	FPDKPKLDVTDEMKKQNYNATKMFEMANDFFKGLGMAEMPTAFWEESMIEKPTDREVQCHASAWDFYNRKDFRIKQCTEVNMDDFQTVHHEMGHVEYYLQYMNQSVPFRRGANDGFHEAIGDVLGLSVATPAHLQKVGLLKDSAGSDPLMDLNYMFATALDKIAFLPFGLLMDLYRYDIFSNTIPKDKLNEMWWDYRVRYQGVCAPALRSEEDFDAGAKHHIPGDTPYMRYFVSFIIQFQFHKALCTEAGHQGPLYTCDIANSTAAGARLSKAMQMGSSEPWQNVMYALTGTRDMSAKALIEFFNPVYEFLKNENKKYGVKTGWTHTPYCYSREATTTQASASTTSGAALGAVVSALLMTFCLM	0.16	0.16
	TS7, 8	EZ762583	contig24559:1:1096:3|similar to Angiotensin-converting enzyme (Q50JE5)|Evalue: 1e-118	101	41747	2	11	364	5.68	FPDKPKLDVTDEMKKQNYNATKMFEMANDFFKGLGMAEMPTAFWEESMIEKPTDREVQCHASAWDFYNRKDFRIKQCTEVNMDDFQTVHHEMGHVEYYLQYMNQSVPFRRGANDGFHEAIGDVLGLSVATPAHLQKVGLLKDSAGSDPLMDLNYMFATALDKIAFLPFGLLMDLYRYDIFSNTIPKDKLNEMWWDYRVRYQGVCAPALRSEEDFDAGAKHHIPGDTPYMRYFVSFIIQFQFHKALCTEAGHQGPLYTCDIANSTAAGARLSKAMQMGSSEPWQNVMYALTGTRDMSAKALIEFFNPVYEFLKNENKKYGVKTGWTHTPYCYSREATTTQASASTTSGAALGAVVSALLMTFCLM	0.16	0.24
	AS8	EZ759838	contig05132:1:1108:2|similar to Angiotensin-converting enzyme (P47820)|Evalue: 1e-110	74	43545	2	5.7	369	8.42	GRLMRQKYIDYVALKNXSSKLNGYSDAGEMWRSNYVVESLNYTDAQLLKDLDDLWLQMKPMYEQIHAYVRRKLINMYPKEQIRANGTIPAHLLGNMWAQTWDGVLNFTQLYPKKPSLDVTEEMKRQNYTVERMFKLSEKFQTDIGLKPMTAIFWNKTMFVRPNDTREVVCHASAWDMYKLNDFRIKMCTEIRMDDFITIHHEMGHIQYYLQYQNQLLPFREGANSGFHEAVGDTLSLSVGTPKHLSLLGLLKNYKPDIENDLNFMFQTALDKIVFLPFGYIMDRYRYDVFSGKIPTSKLNNGWWTYVNKYQGLDAPVVRSEKDFDPGAKYHTAADVEYMRYFISFVLQFQFHKALCTAAGHKGPLYQCD	0.16	0.16
	EES7	EZ759838	contig05132:1:1108:2|similar to Angiotensin-converting enzyme (P47820)|Evalue: 1e-110	66	43545	2	4.1	369	8.42	GRLMRQKYIDYVALKNXSSKLNGYSDAGEMWRSNYVVESLNYTDAQLLKDLDDLWLQMKPMYEQIHAYVRRKLINMYPKEQIRANGTIPAHLLGNMWAQTWDGVLNFTQLYPKKPSLDVTEEMKRQNYTVERMFKLSEKFQTDIGLKPMTAIFWNKTMFVRPNDTREVVCHASAWDMYKLNDFRIKMCTEIRMDDFITIHHEMGHIQYYLQYQNQLLPFREGANSGFHEAVGDTLSLSVGTPKHLSLLGLLKNYKPDIENDLNFMFQTALDKIVFLPFGYIMDRYRYDVFSGKIPTSKLNNGWWTYVNKYQGLDAPVVRSEKDFDPGAKYHTAADVEYMRYFISFVLQFQFHKALCTAAGHKGPLYQCD	0.16	0.16
	TS8	EZ759838	contig05132:1:1108:2|similar to Angiotensin-converting enzyme (P47820)|Evalue: 1e-110	76	43545	3 (2)	4.3	369	8.42	GRLMRQKYIDYVALKNXSSKLNGYSDAGEMWRSNYVVESLNYTDAQLLKDLDDLWLQMKPMYEQIHAYVRRKLINMYPKEQIRANGTIPAHLLGNMWAQTWDGVLNFTQLYPKKPSLDVTEEMKRQNYTVERMFKLSEKFQTDIGLKPMTAIFWNKTMFVRPNDTREVVCHASAWDMYKLNDFRIKMCTEIRMDDFITIHHEMGHIQYYLQYQNQLLPFREGANSGFHEAVGDTLSLSVGTPKHLSLLGLLKNYKPDIENDLNFMFQTALDKIVFLPFGYIMDRYRYDVFSGKIPTSKLNNGWWTYVNKYQGLDAPVVRSEKDFDPGAKYHTAADVEYMRYFISFVLQFQFHKALCTAAGHKGPLYQCD	0.16	0.16
	AS6, 6-9	EZ759453	contig02953:24:1973:3|similar to Angiotensin-converting enzyme (Q6Q4G4)|Evalue: 2e-156	1170	74508	28 (19)	43.8	649	5.5	MNRTIFVLAALFLSSVYCIPLENGSDEQTNNNKVIPAPATIDEVGFSNWVQNVYNPLAEQTLNRDVKAQWTQDTDMTPEHQAAAIATSEQTAAFSKEVAAEVDKFKDVWSNFGNATNRRLYTKMSKLGDAKLSPEDFKKLADLKAKMAEVYSAAQICSDPTITDFNQCPQEKRWNLDPQITAELSRSRDEPMLLHLWKSWRDVSGKRYRAEYLEYVALKNKAAQANGYNNNGEQWRSPYVEPDYKTAAYPNGYSDTDFMKDIDVIWTQVKPLYEQVHAYVRGELIKQYPNLGIRRDGHIPAHLLGNMWAQQWSNLLDITQLYPSLPSLDVTGTMIEKKWNALTMFQTSETFFTDLGLIKMPPAFWDRSMLWKPEDPDRKVVCHASAWDFYDRKDFRIKQ…	1.58	2.88
	TS7, 6-9	EZ759453	contig02953:24:1973:3|similar to Angiotensin-converting enzyme (Q6Q4G4)|Evalue: 2e-156	857	74508	27 (17)	40.2	649	5.5	MNRTIFVLAALFLSSVYCIPLENGSDEQTNNNKVIPAPATIDEVGFSNWVQNVYNPLAEQTLNRDVKAQWTQDTDMTPEHQAAAIATSEQTAAFSKEVAAEVDKFKDVWSNFGNATNRRLYTKMSKLGDAKLSPEDFKKLADLKAKMAEVYSAAQICSDPTITDFNQCPQEKRWNLDPQITAELSRSRDEPMLLHLWKSWRDVSGKRYRAEYLEYVALKNKAAQANGYNNNGEQWRSPYVEPDYKTAAYPNGYSDTDFMKDIDVIWTQVKPLYEQVHAYVRGELIKQYPNLGIRRDGHIPAHLLGNMWAQQWSNLLDITQLYPSLPSLDVTGTMIEKKWNALTMFQTSETFFTDLGLIKMPPAFWDRSMLWKPEDPDRKVVCHASAWDFYDRKDFRIKQ…	1.27	2.06
peptidase M28 family	AS7	EZ760112	contig06892:141:2399:3|similar to Glutamate carboxypeptidase 2 (P70627)|Evalue: 2e-110	126	82782	2	4.4	752	6.24	MNKKYLAIAVVAALVTFAIGIVIGHFAIPKSASDSPTPPNNTSADALRQRMFNMVSVDELRRNLEYLGNASHPSGTQANRDRANWILQKFREYKLESAHLAPYNVLLSRPDKDKPNAVYVSAADGTEQFRLKLREDTNDTLVGFDDSYFGYAMSGIRSSQSLVYANEAGADDFAKLKELGVNVTGSIVIAQIGGVFRGDKVAMAVKHGAVAVLLYKDPSSSSPRGPNDVYPNSKYMPKSAIERGNVILNKGDPLSPGFASEPQNATSHYQLDINDADLPKVVAQPISWEQAQRLFDIMDNTIPVPIGWKPPXYMNYAVGGPLKDNRKLTLEITNKYENHDITNVIGVVKGCVEEDRYVILGNHFDSWTYGGVDPNSGTIALLEVVKAIGEASSSKTWCP…	0.08	0.08
peptidase M3 family	AS9	EZ760002	contig06137:64:2154:1|similar to Mitochondrial intermediate peptidase (A6H611)|Evalue: 3e-169	76	79797	2	3	696	6.99	MRRVTCATIGQSRLLKDRSLHSSVSHCYVGTWSPLANVFNQKPDTSKSWSLTLSHKGLFGYDELSRPKGFETMRKQAEYDTERLMREATSHNRSRNVVEVFDELSDTLCKVADLAECIRTLHSDSKYANAAEKTHASMNGLVEELNTNKPLYESIRKAVANGDVRPMDAVDRHVAXTVSFDFEQCGIHLSDQKRKQAVDLNAKILSFGSQFMRLSRASRTVAKSAIPQSALPYFQEKRSNILVNSPMSDASDASLREAAYRAYLAPDKETEETLNALLRYRHELAKLVGFKSFSERANRGTTFENTETILEFLNQLSSKLERGSAEDHKLLLDLKRKEEGSHQSKLYPWDVQYYTSVARDEKVAYSSTELASYFPLGACIDALSELFRSIYGVHFEVED…	0.08	0.08
peptidase M24B family	AS9, 10	EZ762604	contig24645:198:2063:3|similar to Xaa-Pro aminopeptidase 1 (Q1JPJ2)|Evalue: 3e-180	218	69258	4	8.7	621	5.43	MAPTNTTARLSKLRQLMKSRTHVPELLNAYIIPTDDAHQNEYISAYDQRREYISGFSGSAGTAIVTNDLAALWTDGRYFLQATQQLDSNWALVKDRLPDSPTFGQWLNAHLPKGSVVGADAHLVSSKTWNSLAEELESVGSRLVSVSENLVDLIWENRPQPPNAPIMVLPLRYAGKDWTEKVNDLRLKMAEKKADYFVVTALDEIAWLLNLRGADIPFNPVFFXXYVVVGQESVTLFVNQTKVTHAIVEHLNLTESEPMDADMTVQVTVAPYENVLSYLDEITHRKDDRKVLVTPESSHSILSRVPKERLVTGASPIALMKSLKNAVELEGMVETHIRDGVALAEFFSWMEREVPKGHVTEMSAAAKLEEIRSKQENYVSLSFDTIAGSGPNGAVIHYK…	0.2	0.3
	TS10, 9	EZ762604	contig24645:198:2063:3|similar to Xaa-Pro aminopeptidase 1 (Q1JPJ2)|Evalue: 3e-180	153	69258	4	8.1	621	5.43	MAPTNTTARLSKLRQLMKSRTHVPELLNAYIIPTDDAHQNEYISAYDQRREYISGFSGSAGTAIVTNDLAALWTDGRYFLQATQQLDSNWALVKDRLPDSPTFGQWLNAHLPKGSVVGADAHLVSSKTWNSLAEELESVGSRLVSVSENLVDLIWENRPQPPNAPIMVLPLRYAGKDWTEKVNDLRLKMAEKKADYFVVTALDEIAWLLNLRGADIPFNPVFFXXYVVVGQESVTLFVNQTKVTHAIVEHLNLTESEPMDADMTVQVTVAPYENVLSYLDEITHRKDDRKVLVTPESSHSILSRVPKERLVTGASPIALMKSLKNAVELEGMVETHIRDGVALAEFFSWMEREVPKGHVTEMSAAAKLEEIRSKQENYVSLSFDTIAGSGPNGAVIHYK…	0.15	0.3
	AS11, 10	EZ759983	contig06040:1:1489:2|similar to Xaa-Pro dipeptidase (P12955)|Evalue: 0.0	248	56437	3	9.7	495	5.45	QHYEDHATARINRDGFDLSKLTVPMSLFANNRERLCKELRQSSQYSPSQVVLLQGGASAQRYCTDVELLFRQESFFHWAFGVLEPDCYGTIDVESGKSTLFVPRLPESYGVWLGKVWSCEDFKTYYRVDSVHYVDELPLFFTEIKNASLTLLTLTGVNSDSGSTTKEATFEGIDKFTVNNTILYPIFCECRVIKSAEELDVLRYVNKISSAAHRHVMSKVRVGLKEYQMESEFLHFAYYYGGCRHTSYTCICGAGENSAVLHYGHAAAPNDRVLKDGDMCLFDMGAEYYCYSSDITCSFPANGKFTGNQKIVYNAVLKANRAVLNTMKPXISWVDMHLLAERNILESLKAAGLVRGELDQMMEARLGAVFMPHGLGHFMGIDVHDVGAYPKGTERIQKP…	0.19	0.38
	TS11, 10, 14	EZ759983	contig06040:1:1489:2|similar to Xaa-Pro dipeptidase (P12955)|Evalue: 0.0	349	56437	8 (7)	18.2	495	5.45	QHYEDHATARINRDGFDLSKLTVPMSLFANNRERLCKELRQSSQYSPSQVVLLQGGASAQRYCTDVELLFRQESFFHWAFGVLEPDCYGTIDVESGKSTLFVPRLPESYGVWLGKVWSCEDFKTYYRVDSVHYVDELPLFFTEIKNASLTLLTLTGVNSDSGSTTKEATFEGIDKFTVNNTILYPIFCECRVIKSAEELDVLRYVNKISSAAHRHVMSKVRVGLKEYQMESEFLHFAYYYGGCRHTSYTCICGAGENSAVLHYGHAAAPNDRVLKDGDMCLFDMGAEYYCYSSDITCSFPANGKFTGNQKIVYNAVLKANRAVLNTMKPXISWVDMHLLAERNILESLKAAGLVRGELDQMMEARLGAVFMPHGLGHFMGIDVHDVGAYPKGTERIQKP…	0.49	0.61
peptidase M14 family	AS12	EZ759058	contig00879:1:1167:1|similar to Carboxypeptidase B (P04069)|Evalue: 6e-69	127	43465	3	7.2	388	5.84	LSKDIDEQKGDFGKSEVWGHPEKGLTGDAVLVLTSPEYFGKLALQLNLHGFKYEVTIEDVGRTIQEEQSATRNSGRMDWTSYHRYAEIEEWVQSKANALPGILKLEVIGTTYEGRNVYMYTIGKARADGKKKPAIWLDSNVHAREFVTSASLTWMLNEMFTKYGSDPSITRMIDDVDWYVVPHANPDGFEYAHTKDRMWRRTRRMNPFNDCAGADPNRNNDYKWMVGGADQQPCGQVFAGPHPFSEPETLLISDKILELNADGRIKALLTLHSFSQMWMTTWGYALEYPSDYPDQLKLAQEATAALRSVSGTNYRVGSSTALLGAAAGAIGDWGKAKGGIKYSYGIELRDTGRYGFLLPANQIIPTATEIFEAIKVVATKMAKEFPAV	0.25	0.25
	TS12	EZ759058	contig00879:1:1167:1|similar to Carboxypeptidase B (P04069)|Evalue: 6e-69	89	43465	2	4.9	388	5.84	LSKDIDEQKGDFGKSEVWGHPEKGLTGDAVLVLTSPEYFGKLALQLNLHGFKYEVTIEDVGRTIQEEQSATRNSGRMDWTSYHRYAEIEEWVQSKANALPGILKLEVIGTTYEGRNVYMYTIGKARADGKKKPAIWLDSNVHAREFVTSASLTWMLNEMFTKYGSDPSITRMIDDVDWYVVPHANPDGFEYAHTKDRMWRRTRRMNPFNDCAGADPNRNNDYKWMVGGADQQPCGQVFAGPHPFSEPETLLISDKILELNADGRIKALLTLHSFSQMWMTTWGYALEYPSDYPDQLKLAQEATAALRSVSGTNYRVGSSTALLGAAAGAIGDWGKAKGGIKYSYGIELRDTGRYGFLLPANQIIPTATEIFEAIKVVATKMAKEFPAV	0.16	0.16
	AS12, 13, 15	EZ760067	contig06628:84:1388:3|similar to Carboxypeptidase B (P04069)|Evalue: 4e-70	451	49241	8	27.4	434	5.87	MDLKLVTLCVLALCAAYATSEEEVHYQNYKLFATYPKTKSQNDFLIQLNEEFQRGVYGNQKMEVWGHPEKGVSPDPILVLSSPEFQPQLVFLLNLHGIKYEITIDNVEQTVMRERAATRSGPMEWTNYHRYAEIEEWIQEMGKALPGIVKLETLGLTYEGRNIYMFTIGKPRADGKTKPAIWVDSNIHAREFISSATLTFMLNEIFTKYSKDAEVTKMVDEIDWYVVPVMNPDGLEHAHTKERMWRRTRKVNPFNDCAGADPNRNYDHQWMRSGSDQAPCGQVFAGPYPFSEVETLLTTDKFLDLNKNGQIKALLTIHSFSQVWLTPWGYALEYPTDYQDLVKMGQEATAALKAVHGTSYRTGSSTALLGAAAGATDDWGKAKGGAKYSYTVELRDTGR…	0.68	0.82
	TS12, 13	EZ760067	contig06628:84:1388:3|similar to Carboxypeptidase B (P04069)|Evalue: 4e-70	428	49241	7 (6)	21	434	5.87	MDLKLVTLCVLALCAAYATSEEEVHYQNYKLFATYPKTKSQNDFLIQLNEEFQRGVYGNQKMEVWGHPEKGVSPDPILVLSSPEFQPQLVFLLNLHGIKYEITIDNVEQTVMRERAATRSGPMEWTNYHRYAEIEEWIQEMGKALPGIVKLETLGLTYEGRNIYMFTIGKPRADGKTKPAIWVDSNIHAREFISSATLTFMLNEIFTKYSKDAEVTKMVDEIDWYVVPVMNPDGLEHAHTKERMWRRTRKVNPFNDCAGADPNRNYDHQWMRSGSDQAPCGQVFAGPYPFSEVETLLTTDKFLDLNKNGQIKALLTIHSFSQVWLTPWGYALEYPTDYQDLVKMGQEATAALKAVHGTSYRTGSSTALLGAAAGATDDWGKAKGGAKYSYTVELRDTGR…	0.47	0.61
peptidase M17 family	AS10, 5, 9-11	EZ762173	contig23074:128:1567:2|similar to Probable aminopeptidase NPEPL1 (Q6NSR8)|Evalue: 6e-108	527	52397	11 (10)	29.6	480	6.86	MKTKQITFSGVVSRSNPEEFPVLIVGHSDLLKTHLTYAAAQPKFGDVITEKLFTTAVAKLQPSVNSDVIPVYHNSVVVAALPNRCSRHNAPSQPHALTKILKDWSPSIQTVNGIKQQFVVIVCYAQDVFALSIAVARSYPLYSSKTSPLFGSKVVVGATDPSPVAAEAEPQGFVNVEFVVVPNNNVHIPWIPQFNDRSAFANLEIIGNAVRNAARIVDTPCLEYNTSSFVQEAKDMAKELGVKVTVIEGKELEAKGFGAIWSVGKAAEYPPALVVLSHIPESTNEFTPKKVAWVGKGIVFDTGGLCIKTPKTLMCGMKRDCGGAAAVMHAFRAAVKCGFKHELHAVLCIAENSVSSNATRPDDIIYSYSGRSIEINNTDAEGRLVLADGVAYAQKDLKC…	0.84	1.3
	EES9, 10	EZ762173	contig23074:128:1567:2|similar to Probable aminopeptidase NPEPL1 (Q6NSR8)|Evalue: 6e-108	150	52397	4 (3)	10	480	6.86	MKTKQITFSGVVSRSNPEEFPVLIVGHSDLLKTHLTYAAAQPKFGDVITEKLFTTAVAKLQPSVNSDVIPVYHNSVVVAALPNRCSRHNAPSQPHALTKILKDWSPSIQTVNGIKQQFVVIVCYAQDVFALSIAVARSYPLYSSKTSPLFGSKVVVGATDPSPVAAEAEPQGFVNVEFVVVPNNNVHIPWIPQFNDRSAFANLEIIGNAVRNAARIVDTPCLEYNTSSFVQEAKDMAKELGVKVTVIEGKELEAKGFGAIWSVGKAAEYPPALVVLSHIPESTNEFTPKKVAWVGKGIVFDTGGLCIKTPKTLMCGMKRDCGGAAAVMHAFRAAVKCGFKHELHAVLCIAENSVSSNATRPDDIIYSYSGRSIEINNTDAEGRLVLADGVAYAQKDLKC…	0.28	0.34
	TS10, 9-11, 4, 5	EZ762173	contig23074:128:1567:2|similar to Probable aminopeptidase NPEPL1 (Q6NSR8)|Evalue: 6e-108	607	52397	16 (11)	35.2	480	6.86	MKTKQITFSGVVSRSNPEEFPVLIVGHSDLLKTHLTYAAAQPKFGDVITEKLFTTAVAKLQPSVNSDVIPVYHNSVVVAALPNRCSRHNAPSQPHALTKILKDWSPSIQTVNGIKQQFVVIVCYAQDVFALSIAVARSYPLYSSKTSPLFGSKVVVGATDPSPVAAEAEPQGFVNVEFVVVPNNNVHIPWIPQFNDRSAFANLEIIGNAVRNAARIVDTPCLEYNTSSFVQEAKDMAKELGVKVTVIEGKELEAKGFGAIWSVGKAAEYPPALVVLSHIPESTNEFTPKKVAWVGKGIVFDTGGLCIKTPKTLMCGMKRDCGGAAAVMHAFRAAVKCGFKHELHAVLCIAENSVSSNATRPDDIIYSYSGRSIEINNTDAEGRLVLADGVAYAQKDLKC…	1.21	1.8
	AS10	EZ761760	contig20649:1:270:1|similar to Probable aminopeptidase NPEPL1 (Q6NSR8)|Evalue: 1e-12	64	9791	2	16.9	89	5.58	AGLFMLSHLGFEWDGIWVHVDMAAPVHIGERASGYGVGLLLALFADAFEDPVLRSLPKFAEALHRQDQLASDRLHTMPLTRSAQLTSLI	0.84	0.84
	AS10, 11	EZ761290	contig18449:1:1229:3|similar to Putative aminopeptidase W07G4.4 (Q27245)|Evalue: 2e-87	1134	44803	44 (18)	55.4	408	8.14	ARDIGGSDPERMASPRVVEYVKQTFEGVDNVKIDVIDDQGTLEKDFPLLGAVNRAATVIPRHHGRIIFMEYTGEGPIQETILLVGKGITYDTGGADVKAGGVMAGMHRDKCGAAAVAGFFKILSILKPKGVKVIGGLSMVRNSIGENCYVADEIITSRAGVRVRVGNTDAEGRMVMTDVLCYFKERIIQDKLPNPQMYTLATLTGHAVMAAGPAYSLVLDNGPAKKQRNSLRLYDHSEAIGEPVELSSIRREDYEFNAPKSEYEDVVQCNNLPSSRTARGHQSPAAFMIVASGLDKHGIDSQLPIPYTHIDIAGSAGPFPGIPTGTPILGLCARHXIAPHWQYYSMKGLFFQWSFIPILSVTGFVNSAICGSAIRVISVFIFMLQTCVLIVVHVVTIFF…	5.34	6.37
	EES9, 10	EZ761290	contig18449:1:1229:3|similar to Putative aminopeptidase W07G4.4 (Q27245)|Evalue: 2e-87	659	44803	17 (13)	39.2	408	8.14	ARDIGGSDPERMASPRVVEYVKQTFEGVDNVKIDVIDDQGTLEKDFPLLGAVNRAATVIPRHHGRIIFMEYTGEGPIQETILLVGKGITYDTGGADVKAGGVMAGMHRDKCGAAAVAGFFKILSILKPKGVKVIGGLSMVRNSIGENCYVADEIITSRAGVRVRVGNTDAEGRMVMTDVLCYFKERIIQDKLPNPQMYTLATLTGHAVMAAGPAYSLVLDNGPAKKQRNSLRLYDHSEAIGEPVELSSIRREDYEFNAPKSEYEDVVQCNNLPSSRTARGHQSPAAFMIVASGLDKHGIDSQLPIPYTHIDIAGSAGPFPGIPTGTPILGLCARHXIAPHWQYYSMKGLFFQWSFIPILSVTGFVNSAICGSAIRVISVFIFMLQTCVLIVVHVVTIFF…	1.7	2.6
	TS10, 11	EZ761290	contig18449:1:1229:3|similar to Putative aminopeptidase W07G4.4 (Q27245)|Evalue: 2e-87	1073	44803	33 (17)	55.1	408	8.14	ARDIGGSDPERMASPRVVEYVKQTFEGVDNVKIDVIDDQGTLEKDFPLLGAVNRAATVIPRHHGRIIFMEYTGEGPIQETILLVGKGITYDTGGADVKAGGVMAGMHRDKCGAAAVAGFFKILSILKPKGVKVIGGLSMVRNSIGENCYVADEIITSRAGVRVRVGNTDAEGRMVMTDVLCYFKERIIQDKLPNPQMYTLATLTGHAVMAAGPAYSLVLDNGPAKKQRNSLRLYDHSEAIGEPVELSSIRREDYEFNAPKSEYEDVVQCNNLPSSRTARGHQSPAAFMIVASGLDKHGIDSQLPIPYTHIDIAGSAGPFPGIPTGTPILGLCARHXIAPHWQYYSMKGLFFQWSFIPILSVTGFVNSAICGSAIRVISVFIFMLQTCVLIVVHVVTIFF…	2.86	4.21
	AS10, 9-11, 15	EZ759969	contig05967:88:688:1|similar to Putative aminopeptidase W07G4.4 (Q27245)|Evalue: 9e-13	708	22292	25 (10)	64	200	5.26	MVSELKSRMSALKLNSSFLTTKVEYSSRLSNFDGFDCLVIVADQTVKDTRVLKEFGHINEALEITRKLDANAEKVATVTHTETFKRVVFAPTGPINRDTDDVRRYEEAAYEXGQESDVAGAKAPFVYVDVPEEIRANPLYMNADLVATLGALRAVYVPLEVREAKAERASKVERLGFFYPNEQRSAEAGNLATILEAGRI	7.16	8.95
	EES9, 10	EZ759969	contig05967:88:688:1|similar to Putative aminopeptidase W07G4.4 (Q27245)|Evalue: 9e-13	508	22292	9 (8)	54.5	200	5.26	MVSELKSRMSALKLNSSFLTTKVEYSSRLSNFDGFDCLVIVADQTVKDTRVLKEFGHINEALEITRKLDANAEKVATVTHTETFKRVVFAPTGPINRDTDDVRRYEEAAYEXGQESDVAGAKAPFVYVDVPEEIRANPLYMNADLVATLGALRAVYVPLEVREAKAERASKVERLGFFYPNEQRSAEAGNLATILEAGRI	2.06	3.38
	TS10, 11	EZ759969	contig05967:88:688:1|similar to Putative aminopeptidase W07G4.4 (Q27245)|Evalue: 9e-13	713	22292	26 (10)	64	200	5.26	MVSELKSRMSALKLNSSFLTTKVEYSSRLSNFDGFDCLVIVADQTVKDTRVLKEFGHINEALEITRKLDANAEKVATVTHTETFKRVVFAPTGPINRDTDDVRRYEEAAYEXGQESDVAGAKAPFVYVDVPEEIRANPLYMNADLVATLGALRAVYVPLEVREAKAERASKVERLGFFYPNEQRSAEAGNLATILEAGRI	7.16	9.22
UPF0326 family	AS11	EZ761551	contig19578:1:925:2|similar to PPPDE peptidase domain-containing protein 2 (Q6GLM5)|Evalue: 3e-05	281	34730	6 (4)	17.2	308	4.6	RSTKYHFLDYNSNAFCNEVTQFLTGKSIPLHLLKTPTDDVITANRSGEQQLRVLLDQLANSGTALDVIGASFVPRAPLFDPEEEALMQAAHDAINKPMPRATPMPRSADLSEDELDSNDVFTSERESKPMATFENLDVTDAYAQLQKALKAIMPPEDVDLLDEIFEYATTTDENALLISISRNHFAFISDILISDELQPFVKIQAVKLLQVILRNSNAINVIRFSPEHPVMEYLLLLTKQRTPDAAELLEALKMVCNACTTKSGLNWLVDEREWSVENSNVETFNLKISTEFCVWALSNKSKDVQDAA	0.58	0.58
	TS11	EZ761551	contig19578:1:925:2|similar to PPPDE peptidase domain-containing protein 2 (Q6GLM5)|Evalue: 3e-05	304	34730	6 (4)	17.2	308	4.6	RSTKYHFLDYNSNAFCNEVTQFLTGKSIPLHLLKTPTDDVITANRSGEQQLRVLLDQLANSGTALDVIGASFVPRAPLFDPEEEALMQAAHDAINKPMPRATPMPRSADLSEDELDSNDVFTSERESKPMATFENLDVTDAYAQLQKALKAIMPPEDVDLLDEIFEYATTTDENALLISISRNHFAFISDILISDELQPFVKIQAVKLLQVILRNSNAINVIRFSPEHPVMEYLLLLTKQRTPDAAELLEALKMVCNACTTKSGLNWLVDEREWSVENSNVETFNLKISTEFCVWALSNKSKDVQDAA	0.58	0.58
peptidase S9B family	AS9	EZ759948	contig05826:1:988:2|similar to Dipeptidyl peptidase family member 6 (P34422)|Evalue: 4e-21	491	37192	11 (9)	32	328	5.44	RKLQSNFRFHQTYVAFVGDGIYAFGYDTDKPMTLFYYDLKTDVVTPIKSNVEIDEFKGYLSKAEQITFPTASGVNAYAFFYSPTNKDYTASKDELPPLLVRAHGGPTASATPRLRLSYQFYTSRGFAVVDVDYQGSSGYGREFREALYGKWGVLDAEDCKYCVEYLVKNNLVDPERVVISGGSSAGLTVLNGLINYKDVFKSGASYYGVTDLVMLAGDTHKFELRYLDQLLGPLETSRAIYEERSPINNADKLQRPIIFFQGTEDKIVPPSQSESMYESVKKKGITCDYILFEGEGHGFNDGKNIKKALEMEYQFYAKVFEIFPIKVD	1.16	1.16
	EES8	EZ759948	contig05826:1:988:2|similar to Dipeptidyl peptidase family member 6 (P34422)|Evalue: 4e-21	160	37192	6 (5)	19.2	328	5.44	RKLQSNFRFHQTYVAFVGDGIYAFGYDTDKPMTLFYYDLKTDVVTPIKSNVEIDEFKGYLSKAEQITFPTASGVNAYAFFYSPTNKDYTASKDELPPLLVRAHGGPTASATPRLRLSYQFYTSRGFAVVDVDYQGSSGYGREFREALYGKWGVLDAEDCKYCVEYLVKNNLVDPERVVISGGSSAGLTVLNGLINYKDVFKSGASYYGVTDLVMLAGDTHKFELRYLDQLLGPLETSRAIYEERSPINNADKLQRPIIFFQGTEDKIVPPSQSESMYESVKKKGITCDYILFEGEGHGFNDGKNIKKALEMEYQFYAKVFEIFPIKVD	0.41	0.41
	TS9	EZ759948	contig05826:1:988:2|similar to Dipeptidyl peptidase family member 6 (P34422)|Evalue: 4e-21	358	37192	11 (9)	30.8	328	5.44	RKLQSNFRFHQTYVAFVGDGIYAFGYDTDKPMTLFYYDLKTDVVTPIKSNVEIDEFKGYLSKAEQITFPTASGVNAYAFFYSPTNKDYTASKDELPPLLVRAHGGPTASATPRLRLSYQFYTSRGFAVVDVDYQGSSGYGREFREALYGKWGVLDAEDCKYCVEYLVKNNLVDPERVVISGGSSAGLTVLNGLINYKDVFKSGASYYGVTDLVMLAGDTHKFELRYLDQLLGPLETSRAIYEERSPINNADKLQRPIIFFQGTEDKIVPPSQSESMYESVKKKGITCDYILFEGEGHGFNDGKNIKKALEMEYQFYAKVFEIFPIKVD	1.16	1.16
peptidase S51 family	AS17	EZ759673	contig04132:248:522:2|similar to Alpha-aspartyl dipeptidase (Q91642)|Evalue: 2e-16	78	10219	3 (2)	28.6	91	9.1	MDHKFRRLLLISSSRVHGSPPFEFVKSTISNFLGSSVTEILFIPYALKDYDAYVETTQKRFNDVGLNYKITGIHSSPSAIDAVRSAQAIFI	0.79	0.79
peptidase S26B family.	EES19	EZ759413	contig02772:486:1031:3|similar to Signal peptidase complex catalytic subunit SEC11A (Q9R0P6)|Evalue: 3e-70	498	20489	10 (8)	64.6	181	6.41	MKALDGMFDELRRMNKRQVYYQVLNFGMIISTALMIWKGLMVVTNSESPIVVVLSGSMEPAFFRGDLLFLTNHQDEPIRVGDIVVFKIEGRDIPIVHRVLELHDDGDGGIKFLTKGDNNWIDDRGLYAPGQMWLRPQDVVGRAKGYVPYIGMVTIIMNDYPKVKYAVLAALAGFVLLHRES	1.89	1.89
peptidase S10 family	AS11, 10-12, 16, 17	EZ761515	contig19386:1:890:1|similar to Probable serine carboxypeptidase CPVL (Q9H3G5)|Evalue: 2e-74	411	34056	14 (6)	37.2	296	4.77	SSMFALFCEHGPFEIRASMKLTLREYRWTRLANMLYIDNPVGTGFSFTGSLDGYSRNEEQVGKNLYQALLQIYTMFPQYQNGEFYVTGESYGGKYVPAISLRIHQENPKASLKIPLKGLAIGNGLVDPANMMHYGDMLYQMGMLDEGERDVFHASEDAYRKAVSEERWRDAFFIFDDLLNGDKIPYPSFFYNATHSKYYFNMLYTEGPKSFDYYVQYLQECFVKEAIHTGNQEFSNGSVVEDFMLEDVAKSAAPMLATLLDNDYEVMIYNGALDIICGLPLTEAYLQVLQWKGLAE	1.31	2.03
	EES10, 23, 26	EZ761515	contig19386:1:890:1|similar to Probable serine carboxypeptidase CPVL (Q9H3G5)|Evalue: 2e-74	166	34056	3	13.5	296	4.77	SSMFALFCEHGPFEIRASMKLTLREYRWTRLANMLYIDNPVGTGFSFTGSLDGYSRNEEQVGKNLYQALLQIYTMFPQYQNGEFYVTGESYGGKYVPAISLRIHQENPKASLKIPLKGLAIGNGLVDPANMMHYGDMLYQMGMLDEGERDVFHASEDAYRKAVSEERWRDAFFIFDDLLNGDKIPYPSFFYNATHSKYYFNMLYTEGPKSFDYYVQYLQECFVKEAIHTGNQEFSNGSVVEDFMLEDVAKSAAPMLATLLDNDYEVMIYNGALDIICGLPLTEAYLQVLQWKGLAE	0.32	0.52
	TS11, 12	EZ761515	contig19386:1:890:1|similar to Probable serine carboxypeptidase CPVL (Q9H3G5)|Evalue: 2e-74	256	34056	9 (4)	17.6	296	4.77	SSMFALFCEHGPFEIRASMKLTLREYRWTRLANMLYIDNPVGTGFSFTGSLDGYSRNEEQVGKNLYQALLQIYTMFPQYQNGEFYVTGESYGGKYVPAISLRIHQENPKASLKIPLKGLAIGNGLVDPANMMHYGDMLYQMGMLDEGERDVFHASEDAYRKAVSEERWRDAFFIFDDLLNGDKIPYPSFFYNATHSKYYFNMLYTEGPKSFDYYVQYLQECFVKEAIHTGNQEFSNGSVVEDFMLEDVAKSAAPMLATLLDNDYEVMIYNGALDIICGLPLTEAYLQVLQWKGLAE	0.75	1.2
	AS11, 10-12, 16, 17	EZ762434	contig24106:1:138:1|similar to Probable serine carboxypeptidase CPVL (Q9H3G5)|Evalue: 5e-09	128	5363	3	71.7	46	9.69	KTAQKFIWKVDEKDTEVAGYLRHVRNLIQVAIRNGGHMVPYDQPRS	3.77	6.49
	EES10	EZ762434	contig24106:1:138:1|similar to Probable serine carboxypeptidase CPVL (Q9H3G5)|Evalue: 5e-09	112	5363	2	45.7	46	9.69	KTAQKFIWKVDEKDTEVAGYLRHVRNLIQVAIRNGGHMVPYDQPRS	1.83	1.83
	TS11, 10-12, 16, 17	EZ762434	contig24106:1:138:1|similar to Probable serine carboxypeptidase CPVL (Q9H3G5)|Evalue: 5e-09	145	5363	4 (3)	71.7	46	9.69	KTAQKFIWKVDEKDTEVAGYLRHVRNLIQVAIRNGGHMVPYDQPRS	3.77	6.49
peptidase S9A family	AS8, 9	EZ762960	contig26156:52:2316:1|similar to Prolyl endopeptidase (P23687)|Evalue: 0.0	693	86445	17 (13)	21.4	754	6.17	MTLGFVSRRLASATFRSCKRTLQSHKRQFVRVASTMAAAHSQFDYPKTRRDESIEDDFHGQKNXKTHIGIWRDPDSAETKEFVSAQNVVTNSFLSSYPYYEQVKRLVTELHDFERFGCPSIEGPYVYYHHNSGLQNQSVMYQTNSVNEKTGEVFFDPNLLSKDGTIALSSTDFTEDGTLMAYMLSDGGSDWRTINVMDTKTKEKLPDLLTRVKFSGLSWTIDNKGFFYNMYPDMDEKSAHGVTNLTDQNQKVYYHYLGTPQESDVLVAEFPEHPEWKGTVSVTDDGRFAVMSISRSCEHANAVWYCDLSKLESRQIKGQLNWIKLFENFDAEYDVITNEDTKFYIKTNLDAPNHRIIVVDIDNPSQSAWNVLVAEDEKYNLEWVTIANRDKLILHYIED…	0.62	0.7
	EES8, 7	EZ762960	contig26156:52:2316:1|similar to Prolyl endopeptidase (P23687)|Evalue: 0.0	319	86445	7	10.5	754	6.17	MTLGFVSRRLASATFRSCKRTLQSHKRQFVRVASTMAAAHSQFDYPKTRRDESIEDDFHGQKNXKTHIGIWRDPDSAETKEFVSAQNVVTNSFLSSYPYYEQVKRLVTELHDFERFGCPSIEGPYVYYHHNSGLQNQSVMYQTNSVNEKTGEVFFDPNLLSKDGTIALSSTDFTEDGTLMAYMLSDGGSDWRTINVMDTKTKEKLPDLLTRVKFSGLSWTIDNKGFFYNMYPDMDEKSAHGVTNLTDQNQKVYYHYLGTPQESDVLVAEFPEHPEWKGTVSVTDDGRFAVMSISRSCEHANAVWYCDLSKLESRQIKGQLNWIKLFENFDAEYDVITNEDTKFYIKTNLDAPNHRIIVVDIDNPSQSAWNVLVAEDEKYNLEWVTIANRDKLILHYIED…	0.3	0.5
	TS8, 9	EZ762960	contig26156:52:2316:1|similar to Prolyl endopeptidase (P23687)|Evalue: 0.0	549	86445	12 (11)	19.5	754	6.17	MTLGFVSRRLASATFRSCKRTLQSHKRQFVRVASTMAAAHSQFDYPKTRRDESIEDDFHGQKNXKTHIGIWRDPDSAETKEFVSAQNVVTNSFLSSYPYYEQVKRLVTELHDFERFGCPSIEGPYVYYHHNSGLQNQSVMYQTNSVNEKTGEVFFDPNLLSKDGTIALSSTDFTEDGTLMAYMLSDGGSDWRTINVMDTKTKEKLPDLLTRVKFSGLSWTIDNKGFFYNMYPDMDEKSAHGVTNLTDQNQKVYYHYLGTPQESDVLVAEFPEHPEWKGTVSVTDDGRFAVMSISRSCEHANAVWYCDLSKLESRQIKGQLNWIKLFENFDAEYDVITNEDTKFYIKTNLDAPNHRIIVVDIDNPSQSAWNVLVAEDEKYNLEWVTIANRDKLILHYIED…	0.51	0.71
peptidase S33 family	AS15	EZ762551	contig24450:1109:1479:3|similar to Proline iminopeptidase (P93732)|Evalue: 3e-30	199	14060	5	46.7	122	6.57	AWTKWEMATARLHCDHDLVKKAGEDLFALQFARIENHFFVNKGFFESNDQILRDAVKLEAAGIPCVIVQGRYDLVCPMKTAWDLKKIYKSAELIIVADCGHSSKEDGITSGLVKACQKFEHL	1.95	1.95
	TS15	EZ762551	contig24450:1109:1479:3|similar to Proline iminopeptidase (P93732)|Evalue: 3e-30	192	14060	5 (4)	31.1	122	6.57	AWTKWEMATARLHCDHDLVKKAGEDLFALQFARIENHFFVNKGFFESNDQILRDAVKLEAAGIPCVIVQGRYDLVCPMKTAWDLKKIYKSAELIIVADCGHSSKEDGITSGLVKACQKFEHL	1.38	1.38
	AS15	EZ761406	contig18920:1:583:1|similar to Proline iminopeptidase (P52279)|Evalue: 1e-70	165	22554	5 (4)	19.6	194	5.48	QEMSGLYPEIEPFKSERLRVSDVHELYVEQCGNPNGKPIIFVHGGPGGGCSTRDRRFFNPKVYRIVLFDQRGAGQSTPPAELKENTTWDLVEDIEKIRKHLGIDRWVVFGGSWGSTLSLAYAEKHTSTVKALVLRGIFALRREELLWFYQEGASWLFPEYWEEYLACIPEEERGDLMAAYHKRLTGDNEDEKQR	0.74	0.74
	TS15	EZ761406	contig18920:1:583:1|similar to Proline iminopeptidase (P52279)|Evalue: 1e-70	150	22554	4	18.6	194	5.48	QEMSGLYPEIEPFKSERLRVSDVHELYVEQCGNPNGKPIIFVHGGPGGGCSTRDRRFFNPKVYRIVLFDQRGAGQSTPPAELKENTTWDLVEDIEKIRKHLGIDRWVVFGGSWGSTLSLAYAEKHTSTVKALVLRGIFALRREELLWFYQEGASWLFPEYWEEYLACIPEEERGDLMAAYHKRLTGDNEDEKQR	0.74	0.74
peptidase M16 family	AS12, 11-18	EZ761074	contig17475:1:1628:3|similar to Mitochondrial-processing peptidase subunit beta (Q3SZ71)|Evalue: 7e-169	884	61434	35 (14)	41	541	6.16	RTQCIKLFVATPINSLRLTRPHFFRVQSVKMSSSIIKASSALISKGLCSNAGITSICANRNVTRMLSVKSDCSSRVLKPNRRLITGRNARSAATQSAVSYEQSIMNSPETIVTTLKNGLRVASEDSGSPTCTVGLWIDAGSRYENEKNNGVAHFLEHMIFKGTSNRSQMDLEMEVENMGAHLNAYTSREQTVYYAKCFSKDIDHSLDILSDIIQNSQFGEEEIERERGVILREMQEVETNLQEVVFDHLHSIAYQGTPLGRTILGPTENIKSITRNDIIQYIDNHYKAPRMVLAAAGGVDHDKLVKFAEKYFGNISFLYPGEIPEMPKARFTGSDVRVRDDDMPLAHCAIAVETVGWRDADNVPLMVANTIIGSWDRTHGAGSNVSNKLGQYAGETGSC…	2.88	3.99
	EES11, 10, 14, 17	EZ761074	contig17475:1:1628:3|similar to Mitochondrial-processing peptidase subunit beta (Q3SZ71)|Evalue: 7e-169	704	61434	22 (12)	38.1	541	6.16	RTQCIKLFVATPINSLRLTRPHFFRVQSVKMSSSIIKASSALISKGLCSNAGITSICANRNVTRMLSVKSDCSSRVLKPNRRLITGRNARSAATQSAVSYEQSIMNSPETIVTTLKNGLRVASEDSGSPTCTVGLWIDAGSRYENEKNNGVAHFLEHMIFKGTSNRSQMDLEMEVENMGAHLNAYTSREQTVYYAKCFSKDIDHSLDILSDIIQNSQFGEEEIERERGVILREMQEVETNLQEVVFDHLHSIAYQGTPLGRTILGPTENIKSITRNDIIQYIDNHYKAPRMVLAAAGGVDHDKLVKFAEKYFGNISFLYPGEIPEMPKARFTGSDVRVRDDDMPLAHCAIAVETVGWRDADNVPLMVANTIIGSWDRTHGAGSNVSNKLGQYAGETGSC…	1.3	1.45
	TS12, 11-13, 16	EZ761074	contig17475:1:1628:3|similar to Mitochondrial-processing peptidase subunit beta (Q3SZ71)|Evalue: 7e-169	1134	61434	41 (18)	55.1	541	6.16	RTQCIKLFVATPINSLRLTRPHFFRVQSVKMSSSIIKASSALISKGLCSNAGITSICANRNVTRMLSVKSDCSSRVLKPNRRLITGRNARSAATQSAVSYEQSIMNSPETIVTTLKNGLRVASEDSGSPTCTVGLWIDAGSRYENEKNNGVAHFLEHMIFKGTSNRSQMDLEMEVENMGAHLNAYTSREQTVYYAKCFSKDIDHSLDILSDIIQNSQFGEEEIERERGVILREMQEVETNLQEVVFDHLHSIAYQGTPLGRTILGPTENIKSITRNDIIQYIDNHYKAPRMVLAAAGGVDHDKLVKFAEKYFGNISFLYPGEIPEMPKARFTGSDVRVRDDDMPLAHCAIAVETVGWRDADNVPLMVANTIIGSWDRTHGAGSNVSNKLGQYAGETGSC…	2.32	2.72
	EES10	EZ762439	contig24122:171:1724:3|similar to Mitochondrial-processing peptidase subunit alpha (Q10713)|Evalue: 9e-152	145	58203	3	9.3	517	6.9	MYRRINIRSFCSTAAQSPVKSVVKTPLSEPLHGFPTPLFATIKSRIQDETKVTTLPSGLRVATQAKFGQFSTLGIIVDSGSRYEVSHPSGISHFLEKIAFQSTSQFESRDSILQHLEKNGGICDCQISRDSAIYAASVERKGFDGVVKLLNEVSRRMQITEQELNDVRQAIRFDLEDLNVRQEQEPLLTELIHSIAYRENTVGLPRLCPSKNIDKIDRSTLFSYLSQYYVPSRMIIAGVGLEHQRLLDSVQQHFSQKSLWDEDSTLTGSSQSSAADESIAQYTGGDLRVEKDLSDISMGPTAIPEYAHFVLGFESCSHKHEDFIAFCVLNILMGGGGSFSAGGPGKGMYTRLYLNVLNEYHWINNATAYNHAYADTGLFCIHASAPPKYSKELTAIIVK…	0.18	0.18
peptidase M20A family	AS13, 12	EZ761022	contig17100:280:1491:1|similar to Peptidase M20 domain-containing protein 2 (Q8IYS1)|Evalue: 2e-80	405	44723	11 (10)	32	403	5.75	MASNADILVTSLLEREREALNELSQEIWTHPELNFEERHAHAVLTTFLERHGFTLQRSYLGLETAFRAEFQSKNYDPSEHVTVAVLCEYDALPQIGHACGHNLIAEAGVAAGIGMKEVLDKDGTVEGRVVVLGSPAEEGGGGKIDLIDKGAMRDIGFAMMVHPYQFNDAYPVTLGLEGCKVEFFGRAAHASCGPWEGINALDAAVAAYQNVSMLRQQMRPDWRVHGIIMEGGVKPNIIPDRTLSDYFIRAATKGELEILKKKVISCFEAAATATGCTFRIEWDHKAYAGILNNHAMVALYKKHAMNEKIDFPSDIPIVSGSTDMGNVSVVVPSIHPRFKIGFDFIIHTKAFQEVAGSKEAQPYCVIAGKAMALTGVDIFTDKHLQNEIRREFEASRAKF…	1.04	1.28
	EES12	EZ761022	contig17100:280:1491:1|similar to Peptidase M20 domain-containing protein 2 (Q8IYS1)|Evalue: 2e-80	89	44723	3	7.2	403	5.75	MASNADILVTSLLEREREALNELSQEIWTHPELNFEERHAHAVLTTFLERHGFTLQRSYLGLETAFRAEFQSKNYDPSEHVTVAVLCEYDALPQIGHACGHNLIAEAGVAAGIGMKEVLDKDGTVEGRVVVLGSPAEEGGGGKIDLIDKGAMRDIGFAMMVHPYQFNDAYPVTLGLEGCKVEFFGRAAHASCGPWEGINALDAAVAAYQNVSMLRQQMRPDWRVHGIIMEGGVKPNIIPDRTLSDYFIRAATKGELEILKKKVISCFEAAATATGCTFRIEWDHKAYAGILNNHAMVALYKKHAMNEKIDFPSDIPIVSGSTDMGNVSVVVPSIHPRFKIGFDFIIHTKAFQEVAGSKEAQPYCVIAGKAMALTGVDIFTDKHLQNEIRREFEASRAKF…	0.24	0.24
	TS13, 12	EZ761022	contig17100:280:1491:1|similar to Peptidase M20 domain-containing protein 2 (Q8IYS1)|Evalue: 2e-80	251	44723	6	22.8	403	5.75	MASNADILVTSLLEREREALNELSQEIWTHPELNFEERHAHAVLTTFLERHGFTLQRSYLGLETAFRAEFQSKNYDPSEHVTVAVLCEYDALPQIGHACGHNLIAEAGVAAGIGMKEVLDKDGTVEGRVVVLGSPAEEGGGGKIDLIDKGAMRDIGFAMMVHPYQFNDAYPVTLGLEGCKVEFFGRAAHASCGPWEGINALDAAVAAYQNVSMLRQQMRPDWRVHGIIMEGGVKPNIIPDRTLSDYFIRAATKGELEILKKKVISCFEAAATATGCTFRIEWDHKAYAGILNNHAMVALYKKHAMNEKIDFPSDIPIVSGSTDMGNVSVVVPSIHPRFKIGFDFIIHTKAFQEVAGSKEAQPYCVIAGKAMALTGVDIFTDKHLQNEIRREFEASRAKF…	0.53	0.68
	AS13, 12	EZ762570	contig24518:126:1331:3|similar to Peptidase M20 domain-containing protein 2 (Q8IYS1)|Evalue: 2e-83	255	44750	5	16.2	401	6.06	MLSRAESLVTAVLEAEKKSLNTLSQEIWTHPETNFQEKYAHAILTDFLEKRNFRVERHYAGVNTAFRAEFQSRNYDPSIHTTVAVFCEYDALPEIGHACGHNLIAEAGAAAGLSIQAVLANEGSVEGKLVVIGSPAEEGGGGKVDLIQAGALKDVSFAMMVHPFPYNDLEPIILGISRCYVEFFGKAAHASCGPWEGINALDAAVSAYHMISMMRQQMKPDWRVHGIINNGGVKPNVIPDYTKSNYYMRATSAVDLKILEKKVLSCFETAATGAGCTFNVTWEPKPYCGMLNNKTMANLYKTHAQKEKVLYTPDIPGFYGSTDMGNVSVEVPSIHPCFNIGHEYMIHTKDFEHMAGGEGAQRFTLIASKSMAMTAIDIFTNAHLRDIINTEFIESRKKF…	0.43	0.58
	TS13	EZ762570	contig24518:126:1331:3|similar to Peptidase M20 domain-containing protein 2 (Q8IYS1)|Evalue: 2e-83	421	44750	11 (8)	26.9	401	6.06	MLSRAESLVTAVLEAEKKSLNTLSQEIWTHPETNFQEKYAHAILTDFLEKRNFRVERHYAGVNTAFRAEFQSRNYDPSIHTTVAVFCEYDALPEIGHACGHNLIAEAGAAAGLSIQAVLANEGSVEGKLVVIGSPAEEGGGGKVDLIQAGALKDVSFAMMVHPFPYNDLEPIILGISRCYVEFFGKAAHASCGPWEGINALDAAVSAYHMISMMRQQMKPDWRVHGIINNGGVKPNVIPDYTKSNYYMRATSAVDLKILEKKVLSCFETAATGAGCTFNVTWEPKPYCGMLNNKTMANLYKTHAQKEKVLYTPDIPGFYGSTDMGNVSVEVPSIHPCFNIGHEYMIHTKDFEHMAGGEGAQRFTLIASKSMAMTAIDIFTNAHLRDIINTEFIESRKKF…	0.9	0.9
	AS12	EZ758960	contig00345:128:1143:2|similar to Peptidase M20 domain-containing protein 2 (Q501L1)|Evalue: 2e-59	195	36623	4	16	338	5.39	MEVLLKLFNADPATAMATLAANAPVIVQPKAQQYESAVDSAIASVSEGLAYISHEIWSHPELGYEEVFAHKLITDFLEKQGVKVTRGYKDISTAFLAEYETDSFDAKSHPTIAFLCEYDALPEIGHACGHNLITVVGMSSFLATKQALQTSNGQLNAKIVCMGTPAEELFGGKPDLIKKGAFKDIDFALMAHSAPIDIVVPDILGVTEYIVEFFGKAAHASCGPWEGINALDAAVAAYTGVAMMRQGLSPTAQVQAVIVNGGAKPNIIPEYTKSEYALRAATVVEMDLLKKKFHDVIQAAADSTNCRLQMTEVGNPLCGLMSNKVMGAYYKSYGQKKG	0.41	0.41
	TS12	EZ758960	contig00345:128:1143:2|similar to Peptidase M20 domain-containing protein 2 (Q501L1)|Evalue: 2e-59	330	36623	5 (4)	21.3	338	5.39	MEVLLKLFNADPATAMATLAANAPVIVQPKAQQYESAVDSAIASVSEGLAYISHEIWSHPELGYEEVFAHKLITDFLEKQGVKVTRGYKDISTAFLAEYETDSFDAKSHPTIAFLCEYDALPEIGHACGHNLITVVGMSSFLATKQALQTSNGQLNAKIVCMGTPAEELFGGKPDLIKKGAFKDIDFALMAHSAPIDIVVPDILGVTEYIVEFFGKAAHASCGPWEGINALDAAVAAYTGVAMMRQGLSPTAQVQAVIVNGGAKPNIIPEYTKSEYALRAATVVEMDLLKKKFHDVIQAAADSTNCRLQMTEVGNPLCGLMSNKVMGAYYKSYGQKKG	0.54	0.54
	TS12, 13	EZ759512	contig03294:1:292:2|similar to Peptidase M20 domain-containing protein 2 (Q501L1)|Evalue: 9e-12	36	10522	1	8.3	96	7.01	FFPENIPKTNGSTDMGNVSIVIPSIHPAFFIGLPPAMIHTKAFQEVAGKADAVKCALRCGSVLALVALELVISEELRAQTRKDFEMSRKTFTGAEH	0.33	0.66
peptidase M24A family	EES10	EZ759104	contig01139:54:1481:3|similar to Methionine aminopeptidase 2 (P50579)|Evalue: 3e-152	172	53159	5	11.6	475	6.14	MVDDETLQDTNGDVAGDAEELTNEATEPSAATKXEKKRNRKKKPQSAQPATGESVTDSVAAATPTDAETATTAAKSNGEAKALPALPKPEMEIRGLKSQGTSEHAFPKAQTYPPRKPIHELFKNGKYPIGEETTHGKPKNVHEVRKISSDEIKASEGIHDDMYKEIRRAAEAHRQTRKYVQNFIKPGMTMTQICEELEATSRALIGEKGLEAGLAFPTGCSLNHCAAHYTPNPGDKTVLQYDDVCKIDFGTHVNGRIIDCAFTVSFNPKYDKLLEAAREATNMGIKTAGIDVPLNELGEAIQEVMESYELELNGKTYPIKCIRNLNGHLVSQYRIHAGKTVPIVKGGDTTRMEENEIYAIETFGSTGKGYVHDDLDCSHYMKNYDVQYVPLRLGKSKQL…	0.35	0.35
peptidase M49 family	AS8, 8-10, 12, 14, 17, 18	EZ760523	contig10192:37:2259:1|similar to Dipeptidyl-peptidase 3 (O55096)|Evalue: 7e-180	1317	215709	27 (22)	35	740	5.36	MAALNLTRKTREKYYVSRLSRVPTLECRTAFELLKPDEQKYVHYWSKASWIGGLITCVQTSPESPLLFILLQNLFGAEEVKSLESTALKECGLTQEEWDAVKFFAAGFYHNMGNYLGFGDTKIVPEIPKEKFETLIKASAAYKAKGKMIDDLWGRVSTVLYELDNERLRQLGLAPDGVTTYFSWNCNERDSRLVKDFQVEQNIDPYNARVFKSVVKNSADDAATYEIRMASANQKPDGSVKAGKLTLDGKPVQFKNANFIVTGGDYAPLMGKMNEYLKKAVDFASNENEKKMHLEYIKSFETGSMDAHKEGSRYWIKDRRPPVEGYIGFIETYRDPAGQRGEFEGFVAIVDQEKSNRLNKLVDAAETIIAKLPWPKQYEKDKYLRPDFSELTVVTFASS…	0.41	0.59
	EES7, 8, 12, 13	EZ760523	contig10192:37:2259:1|similar to Dipeptidyl-peptidase 3 (O55096)|Evalue: 7e-180	545	215709	14 (13)	20.4	740	5.36	MAALNLTRKTREKYYVSRLSRVPTLECRTAFELLKPDEQKYVHYWSKASWIGGLITCVQTSPESPLLFILLQNLFGAEEVKSLESTALKECGLTQEEWDAVKFFAAGFYHNMGNYLGFGDTKIVPEIPKEKFETLIKASAAYKAKGKMIDDLWGRVSTVLYELDNERLRQLGLAPDGVTTYFSWNCNERDSRLVKDFQVEQNIDPYNARVFKSVVKNSADDAATYEIRMASANQKPDGSVKAGKLTLDGKPVQFKNANFIVTGGDYAPLMGKMNEYLKKAVDFASNENEKKMHLEYIKSFETGSMDAHKEGSRYWIKDRRPPVEGYIGFIETYRDPAGQRGEFEGFVAIVDQEKSNRLNKLVDAAETIIAKLPWPKQYEKDKYLRPDFSELTVVTFASS…	0.2	0.38
	TS8, 8-10, 12, 14, 15, 18, 19	EZ760523	contig10192:37:2259:1|similar to Dipeptidyl-peptidase 3 (O55096)|Evalue: 7e-180	1285	215709	30 (24)	38.9	740	5.36	MAALNLTRKTREKYYVSRLSRVPTLECRTAFELLKPDEQKYVHYWSKASWIGGLITCVQTSPESPLLFILLQNLFGAEEVKSLESTALKECGLTQEEWDAVKFFAAGFYHNMGNYLGFGDTKIVPEIPKEKFETLIKASAAYKAKGKMIDDLWGRVSTVLYELDNERLRQLGLAPDGVTTYFSWNCNERDSRLVKDFQVEQNIDPYNARVFKSVVKNSADDAATYEIRMASANQKPDGSVKAGKLTLDGKPVQFKNANFIVTGGDYAPLMGKMNEYLKKAVDFASNENEKKMHLEYIKSFETGSMDAHKEGSRYWIKDRRPPVEGYIGFIETYRDPAGQRGEFEGFVAIVDQEKSNRLNKLVDAAETIIAKLPWPKQYEKDKYLRPDFSELTVVTFASS…	0.43	0.62
nicastrin family	AS10	EZ759802	contig04903:63:1787:3|similar to Nicalin (Q969V3)|Evalue: 3e-76	250	63940	5	12.7	574	5.59	MTIESVSDLLEITRNGCSSLVWFLLVPFIIIVIGPAMRPAQAVHQFTFHRMQQYDISGASKGTTGVGINCEAQTLLSSALVRRCLVVSWEELITQDIPTLVQKGIVALIVILPKDPSLIASNQRRGFVEMEQSLLKLDLQIPVYFVEDSAEVSDWLRSLSFETGAAKPLTATEELKKQVLGDYYYLSSSLYASKALSDVKVVNIVGRLGPEVVDPDSQRPVYLLVTHLDAFGVAPGLAYGANSDASGVAALMEVIRLFNQLTKNHRGQLKADLVFLISGAGKFNYYGTEKYLEEQTELGESGLLSRVQFVTCLDGVAGQTSAKVFVSKPPKEDTPMYRFFTSMNASSQRLSEQNVNMVHKKINLADEELTWEHERFSLAKVPGFTLTTYEMDTAAERKS…	0.28	0.28
peptidase	TS10	EZ759802	contig04903:63:1787:3|similar to Nicalin (Q969V3)|Evalue: 3e-76	143	63940	3	5.4	574	5.59	MTIESVSDLLEITRNGCSSLVWFLLVPFIIIVIGPAMRPAQAVHQFTFHRMQQYDISGASKGTTGVGINCEAQTLLSSALVRRCLVVSWEELITQDIPTLVQKGIVALIVILPKDPSLIASNQRRGFVEMEQSLLKLDLQIPVYFVEDSAEVSDWLRSLSFETGAAKPLTATEELKKQVLGDYYYLSSSLYASKALSDVKVVNIVGRLGPEVVDPDSQRPVYLLVTHLDAFGVAPGLAYGANSDASGVAALMEVIRLFNQLTKNHRGQLKADLVFLISGAGKFNYYGTEKYLEEQTELGESGLLSRVQFVTCLDGVAGQTSAKVFVSKPPKEDTPMYRFFTSMNASSQRLSEQNVNMVHKKINLADEELTWEHERFSLAKVPGFTLTTYEMDTAAERKS…	0.16	0.16
GTPase activator
Rho GDI family	EES16, 17	EZ762790	contig25413:56:228:2|similar to Rho GDP-dissociation inhibitor 1 (Q5XI73)|Evalue: 7e-05	35	6198	1	15.8	57	4.65	MANRSSGDAKEEVNSDEETNYKAPAKVALTEILEKDKEDESLQKYKAALLGSAAQQS	0.58	1.16
	TS18	EZ762790	contig25413:56:228:2|similar to Rho GDP-dissociation inhibitor 1 (Q5XI73)|Evalue: 7e-05	82	6198	3 (2)	31.6	57	4.65	MANRSSGDAKEEVNSDEETNYKAPAKVALTEILEKDKEDESLQKYKAALLGSAAQQS	1.49	1.49
	AS18, 17	EZ759236	contig01847:1:417:1|similar to Rho GDP-dissociation inhibitor 2 (Q61599)|Evalue: 4e-37	110	16122	3	23.9	138	8.33	PSDARRVIVQNLQLIADGRPDVTIDLTDIQNVKGKKFVMKEGCQYRLRINFYVQREIVSGLKYVQKVNRMNLAVDKITHMVGSYPPNKDMHSFTTPVEEAPTGMFARGVYTVKSLFTDDDQNEHLKWEWTLEIKKDWE	0.77	0.98
	EES16, 17	EZ759236	contig01847:1:417:1|similar to Rho GDP-dissociation inhibitor 2 (Q61599)|Evalue: 4e-37	153	16122	4	33.3	138	8.33	PSDARRVIVQNLQLIADGRPDVTIDLTDIQNVKGKKFVMKEGCQYRLRINFYVQREIVSGLKYVQKVNRMNLAVDKITHMVGSYPPNKDMHSFTTPVEEAPTGMFARGVYTVKSLFTDDDQNEHLKWEWTLEIKKDWE	1.15	2.3
	TS18	EZ759236	contig01847:1:417:1|similar to Rho GDP-dissociation inhibitor 2 (Q61599)|Evalue: 4e-37	186	16122	5 (3)	34.1	138	8.33	PSDARRVIVQNLQLIADGRPDVTIDLTDIQNVKGKKFVMKEGCQYRLRINFYVQREIVSGLKYVQKVNRMNLAVDKITHMVGSYPPNKDMHSFTTPVEEAPTGMFARGVYTVKSLFTDDDQNEHLKWEWTLEIKKDWE	0.77	0.77
Rab GDI family	AS12, 11-14, 18, 19	EZ761845	contig21183:1:1353:1|similar to Rab GDP dissociation inhibitor beta (P50395)|Evalue: 4e-165	1465	50742	44 (25)	71.1	450	6.26	HSPFRHKXRMDEKYDAIVCGTGLTECIISGMLSVSGKRVLHVDRNKYYGGESASITPLEELFAKFNAGSLPTEMGRGRDWNVDLVPKLLLANGELVKLLIHTGVTRYLEFKSIEGSYVYKGGKIHKVPADEKEALGSNLMGLFEKRRFRNFLVYVMEFDPNDPKTWKDIDPRTATMNQVYEKFGLDKNTADFTGHALALYPNDDYVNGPCGPTLEKIKLYQESLARYGKSPYLYPLYGLGELPQGFARLSAIYGGTYMLDKSVDEIVMENGRAVGVRCGNEVAKCSQVYCDPSYAPNRVKKVGEVIRCICLLDHPIPNTKDALSTQIIIPQNQVNRNNDIYISVVSYTHQVAAKGWFIAMVSTTVETQSPESEIKVALELLGPIRQKFVSVTDLLVPTD…	6.04	6.64
	EES11, 12, 17	EZ761845	contig21183:1:1353:1|similar to Rab GDP dissociation inhibitor beta (P50395)|Evalue: 4e-165	1411	50742	48 (23)	65.6	450	6.26	HSPFRHKXRMDEKYDAIVCGTGLTECIISGMLSVSGKRVLHVDRNKYYGGESASITPLEELFAKFNAGSLPTEMGRGRDWNVDLVPKLLLANGELVKLLIHTGVTRYLEFKSIEGSYVYKGGKIHKVPADEKEALGSNLMGLFEKRRFRNFLVYVMEFDPNDPKTWKDIDPRTATMNQVYEKFGLDKNTADFTGHALALYPNDDYVNGPCGPTLEKIKLYQESLARYGKSPYLYPLYGLGELPQGFARLSAIYGGTYMLDKSVDEIVMENGRAVGVRCGNEVAKCSQVYCDPSYAPNRVKKVGEVIRCICLLDHPIPNTKDALSTQIIIPQNQVNRNNDIYISVVSYTHQVAAKGWFIAMVSTTVETQSPESEIKVALELLGPIRQKFVSVTDLLVPTD…	6.04	6.46
	TS12, 4, 11	EZ761845	contig21183:1:1353:1|similar to Rab GDP dissociation inhibitor beta (P50395)|Evalue: 4e-165	1382	50742	49 (23)	67.8	450	6.26	HSPFRHKXRMDEKYDAIVCGTGLTECIISGMLSVSGKRVLHVDRNKYYGGESASITPLEELFAKFNAGSLPTEMGRGRDWNVDLVPKLLLANGELVKLLIHTGVTRYLEFKSIEGSYVYKGGKIHKVPADEKEALGSNLMGLFEKRRFRNFLVYVMEFDPNDPKTWKDIDPRTATMNQVYEKFGLDKNTADFTGHALALYPNDDYVNGPCGPTLEKIKLYQESLARYGKSPYLYPLYGLGELPQGFARLSAIYGGTYMLDKSVDEIVMENGRAVGVRCGNEVAKCSQVYCDPSYAPNRVKKVGEVIRCICLLDHPIPNTKDALSTQIIIPQNQVNRNNDIYISVVSYTHQVAAKGWFIAMVSTTVETQSPESEIKVALELLGPIRQKFVSVTDLLVPTD…	4.83	4.95
API5 family	AS10	EZ762313	contig23612:1:901:2|similar to Apoptosis inhibitor 5 (Q5ZMW3)|Evalue: 7e-39	132	33743	3	12.7	300	8.73	VSVVDEILSDAECTSNVGRCIGGTGGNRSGLRCATSEWTRKAEKLERLNTCARLALPIFSRAIQSTKFVTYYCDHLIPTISAENPDAEIPILQVFAELCTSVGVLDKYKQCMQSVLRKLMELLPPQTDIFLEGQEPQLPKLQFSAVECLLYGFHQLGKHNPTFLTDADETASIKELRTRLHFFASCMQLYSQKMSKGTLNAADPEASKKVDTLRRVIANIKALILDLCHNPPLYKASIHLSWKKESATNPVVSGSDKSTIPRTEGKVPTKRKADDDQNGSIRTIKTTTQSGYNPPVGKFS	0.32	0.32
	EES9	EZ762313	contig23612:1:901:2|similar to Apoptosis inhibitor 5 (Q5ZMW3)|Evalue: 7e-39	235	33743	6 (4)	17	300	8.73	VSVVDEILSDAECTSNVGRCIGGTGGNRSGLRCATSEWTRKAEKLERLNTCARLALPIFSRAIQSTKFVTYYCDHLIPTISAENPDAEIPILQVFAELCTSVGVLDKYKQCMQSVLRKLMELLPPQTDIFLEGQEPQLPKLQFSAVECLLYGFHQLGKHNPTFLTDADETASIKELRTRLHFFASCMQLYSQKMSKGTLNAADPEASKKVDTLRRVIANIKALILDLCHNPPLYKASIHLSWKKESATNPVVSGSDKSTIPRTEGKVPTKRKADDDQNGSIRTIKTTTQSGYNPPVGKFS	0.46	0.46
	TS10	EZ762313	contig23612:1:901:2|similar to Apoptosis inhibitor 5 (Q5ZMW3)|Evalue: 7e-39	161	33743	3	12.3	300	8.73	VSVVDEILSDAECTSNVGRCIGGTGGNRSGLRCATSEWTRKAEKLERLNTCARLALPIFSRAIQSTKFVTYYCDHLIPTISAENPDAEIPILQVFAELCTSVGVLDKYKQCMQSVLRKLMELLPPQTDIFLEGQEPQLPKLQFSAVECLLYGFHQLGKHNPTFLTDADETASIKELRTRLHFFASCMQLYSQKMSKGTLNAADPEASKKVDTLRRVIANIKALILDLCHNPPLYKASIHLSWKKESATNPVVSGSDKSTIPRTEGKVPTKRKADDDQNGSIRTIKTTTQSGYNPPVGKFS	0.32	0.32
	AS10	EZ762244	contig23374:1:640:2|similar to Apoptosis inhibitor 5 homolog (Q9V431)|Evalue: 1e-29	142	23977	3	13.6	213	4.99	LVFSQISEGKGRAAMAKSEDVVGRLYANYMAIDDATEKKEHKDKFLEIVTAAGMKDNPGARKLASDFIRKLFPYFPDQTETAIYALVDLCQDTDLAIRKSAIETMLAMCNTNADYVKRVADLYIQMLAICAPNEIRLLQQSLISLMEKDPKRALEAFHEEIVTGDEAIRSQAIKFLSTRLGELSGAVNTGEFATFLLEVYKKIFVDATAEEFE	0.48	0.48
	EES9	EZ762244	contig23374:1:640:2|similar to Apoptosis inhibitor 5 homolog (Q9V431)|Evalue: 1e-29	286	23977	6 (5)	23.9	213	4.99	LVFSQISEGKGRAAMAKSEDVVGRLYANYMAIDDATEKKEHKDKFLEIVTAAGMKDNPGARKLASDFIRKLFPYFPDQTETAIYALVDLCQDTDLAIRKSAIETMLAMCNTNADYVKRVADLYIQMLAICAPNEIRLLQQSLISLMEKDPKRALEAFHEEIVTGDEAIRSQAIKFLSTRLGELSGAVNTGEFATFLLEVYKKIFVDATAEEFE	0.92	0.92
	TS10	EZ762244	contig23374:1:640:2|similar to Apoptosis inhibitor 5 homolog (Q9V431)|Evalue: 1e-29	210	23977	4	21.1	213	4.99	LVFSQISEGKGRAAMAKSEDVVGRLYANYMAIDDATEKKEHKDKFLEIVTAAGMKDNPGARKLASDFIRKLFPYFPDQTETAIYALVDLCQDTDLAIRKSAIETMLAMCNTNADYVKRVADLYIQMLAICAPNEIRLLQQSLISLMEKDPKRALEAFHEEIVTGDEAIRSQAIKFLSTRLGELSGAVNTGEFATFLLEVYKKIFVDATAEEFE	0.69	0.69
BI1 family	EES18	EZ761169	contig17836:1:706:1|similar to Probable Bax inhibitor 1 (Q9IA79)|Evalue: 2e-47	116	26248	3	13.6	235	8.3	YTQANPRQASFTNLLDFSKLDRPIQLHLQKVYGTLSMTAMVCATGVFCSINGMIPAFLVGNLLTFLAIIGLTVALTATPPTKENQNKRLGMLLGTAFLMGMNMAPLVDAVLMINPQIVFTALLLSCAIFTCFTLAALFAGNDRQYLFLGGILMSGLSTLMIVRLLGVLFGWKLALDFTVYLSLFILCGFVLYDTQLIIQKRKMGDEDYLKHALDLFIDFAGIFKHIMVILAQKEE	0.43	0.43
G-protein coupled receptor 2 family	AS8, 7, 18, 19	EZ760121	contig06974:219:1922:3|seems to belong to G-protein coupled receptor 2 family|Best-hit: Gastric inhibitory polypeptide receptor (P48546)|Evalue: 3e-05	522	64946	15 (10)	26.5	567	5.13	MSLRHIYLLLAILLADYATKAQSVDSYDYNSLHSKSFITVQKAQWRFNTEIECLKFLRRLKSLRGPKSNSCHGEYDGVLCWRYGEPGETVKQLCPQDLDIGHELAEVYAHRVCGQDGQWLQFDGYPGSKNLNTNYDSCKDYNRTHYATHRDTHTSHSQHTQPMHPPPPGHPDYHLWLQSQRAQDNSGAILVEPTQQPTYYTQETALPIYPYHEQQTTQYWATGDHTDLPVVTDIPDMPSTADNVVTDMPDMPLETQTSVQDASLILLATTPVYEPQEYPWIFPNRDECDRYLRQLGFDKNADGPHCPGVYDDVKYCWPATRAGVTMEQPCPVFGSNPASYSTVKKNCDNDGQWNKTTGEGGIIEAPFGYTDYTACKHDEMLATFEAKPQKLELNNESGN…	0.72	0.92
	TS8, 19	EZ760121	contig06974:219:1922:3|seems to belong to G-protein coupled receptor 2 family|Best-hit: Gastric inhibitory polypeptide receptor (P48546)|Evalue: 3e-05	427	64946	13 (8)	22.9	567	5.13	MSLRHIYLLLAILLADYATKAQSVDSYDYNSLHSKSFITVQKAQWRFNTEIECLKFLRRLKSLRGPKSNSCHGEYDGVLCWRYGEPGETVKQLCPQDLDIGHELAEVYAHRVCGQDGQWLQFDGYPGSKNLNTNYDSCKDYNRTHYATHRDTHTSHSQHTQPMHPPPPGHPDYHLWLQSQRAQDNSGAILVEPTQQPTYYTQETALPIYPYHEQQTTQYWATGDHTDLPVVTDIPDMPSTADNVVTDMPDMPLETQTSVQDASLILLATTPVYEPQEYPWIFPNRDECDRYLRQLGFDKNADGPHCPGVYDDVKYCWPATRAGVTMEQPCPVFGSNPASYSTVKKNCDNDGQWNKTTGEGGIIEAPFGYTDYTACKHDEMLATFEAKPQKLELNNESGN…	0.56	0.66
SPCS1 family	EES20, 21	EZ762630	contig24748:1:444:3|similar to Signal peptidase complex subunit 1 (Q5RF96)|Evalue: 3e-06	120	17092	4 (2)	16.3	147	8.64	LLTRISDXFSFDFFAVFGQFLGHKWTLHSTDHFRIESLCKTTTMFEFVFRXXFDRFYMDFEGQKRAEWLYQRIILAFAAVGFVAGYQMQYYSVTVGAVAVGTLLAVLICGIPWPMFRRHPLKWQTSLKETLDTTDTSPVATPKTSPV	0.43	0.63
SPCS2 family	EES18	EZ762364	contig23795:1:487:2|similar to Probable signal peptidase complex subunit 2 (Q5BJI9)|Evalue: 1e-27	149	18380	4 (3)	30.4	161	8.83	AVRKIFVTKQKLPEDHKLMDGRLLISTISVAFSLIALLYDYLLPFPISKEVLAVCSISYFIVVGILSLYILYVEKGTFLVFYGNNLKWLVSSTLKKYEDQYTLTFSGEPISSSTTSTTPIKKHIYXKSVSEFFDEEGYLQMDKFETEVTKAFRGPASKKTN	0.66	0.66
	AS19	EZ759919	contig05652:1721:2191:1|similar to Probable signal peptidase complex subunit 2 (Q5M8Y1)|Evalue: 3e-28	97	18171	3 (2)	17.3	156	9.18	KIFVDKQAFVEDHKLMDGRLLLSTIAVAFSLIALLYDYLFPFPKSKEILAICALSYFITAGILSLYILYVEKGTFLVFYADNKKWRVSSKLKKYEDNYVMTFRSQSTKGSDKVASKEHELKRPVSDFFDQQGFLQMDRFEAEVMKIFRGSHTKKSD	0.67	0.67
	TS19	EZ759919	contig05652:1721:2191:1|similar to Probable signal peptidase complex subunit 2 (Q5M8Y1)|Evalue: 3e-28	95	18171	5 (2)	17.3	156	9.18	KIFVDKQAFVEDHKLMDGRLLLSTIAVAFSLIALLYDYLFPFPKSKEILAICALSYFITAGILSLYILYVEKGTFLVFYADNKKWRVSSKLKKYEDNYVMTFRSQSTKGSDKVASKEHELKRPVSDFFDQQGFLQMDRFEAEVMKIFRGSHTKKSD	0.67	0.67
SPCS3 family	AS19, 18	EZ762220	contig23304:1:554:3|similar to Signal peptidase complex subunit 3 (Q9VCA9)|Evalue: 3e-33	185	20769	6 (4)	23.5	183	8.85	HSLLSRLNAILAFSFTVLAVTTFLVFLSTFQKNYRSAVHMDDLSGRVHMGHVHGLGEVEEAIITGDVEVDLTPLFDWNAKQLFVYLIAEYTNIKKPGSLNQVVLWDRIIKRGENAVIHQKKFSQEYRLLDETKSMKDNSNITLYFQWNIIPNAGALSTARADTTLSLKMPNVYSPSRGQRQSH	0.82	0.98
	EES17, 16	EZ762220	contig23304:1:554:3|similar to Signal peptidase complex subunit 3 (Q9VCA9)|Evalue: 3e-33	240	20769	9 (6)	26.8	183	8.85	HSLLSRLNAILAFSFTVLAVTTFLVFLSTFQKNYRSAVHMDDLSGRVHMGHVHGLGEVEEAIITGDVEVDLTPLFDWNAKQLFVYLIAEYTNIKKPGSLNQVVLWDRIIKRGENAVIHQKKFSQEYRLLDETKSMKDNSNITLYFQWNIIPNAGALSTARADTTLSLKMPNVYSPSRGQRQSH	1.46	1.62
	TS19, 18	EZ762220	contig23304:1:554:3|similar to Signal peptidase complex subunit 3 (Q9VCA9)|Evalue: 3e-33	123	20769	8 (3)	16.4	183	8.85	HSLLSRLNAILAFSFTVLAVTTFLVFLSTFQKNYRSAVHMDDLSGRVHMGHVHGLGEVEEAIITGDVEVDLTPLFDWNAKQLFVYLIAEYTNIKKPGSLNQVVLWDRIIKRGENAVIHQKKFSQEYRLLDETKSMKDNSNITLYFQWNIIPNAGALSTARADTTLSLKMPNVYSPSRGQRQSH	0.82	0.98
Lipase
Lipid degradation	TS12	EZ762626	contig24738:99:1589:3|similar to Pancreatic lipase-related protein 2 (P54318)|Evalue: 2e-58	127	55726	2	6.5	496	5.69	MRSALLVTLCLFTVVSIGLSNATPAQYPQVLRQNAKRASVCCGDLGCFETGGDFWHLIYRPWDILPNCNAVVHFYLSTRFSAPANELLDPYNSAETIGKSHFDPSKETKVLIHGFLDRYDHGWWDSFEREILAFGDYNVIRVDWSRGNQFPYTQAAPNARLAGAYVARLVNTLTEFHGADARKIHIIGHSLGAHVSGYAGERIPNLGRITGIDPAGPAFAGLKGIVRLDPTDALFVDTIVTDGRSILELGLGTLQPMGHLNFYPNGGHTQPGCDLGVFESFFQGNDDEYGVLLNGLICNHLRAAQFFIDGMNSQLCRYMAFECDNYEDFLQGKCFSEEKANFMGLHVNKAVAENGKQKNFYSLTHAFDDYCFHHYKVEFTVNTAASNEDGRIKLTFYGS…	0.12	0.12
	EES9	EZ761974	contig22166:1:1452:1|similar to Pancreatic lipase-related protein 2 (Q64424)|Evalue: 5e-41	158	53712	5 (4)	11.2	483	6.33	MASVAKAKAPTSQRFARPICTEFEDLGTFCRNGSWAVINRLPRPPAELQTKFWLVTSSTQTFKTALLLDYTNPSTISASSFDPNLVTRVFTHGFMENGQDPLIWKIRDLMFAKEKINFIIIDWGNGAMPPDYWRAAGNTPLIAAQLAKTIQALVQLKGASPSKIELIGYSLGAQVSAFTAARLKEYGVDIPIKRITALDPAGPLFEGSDLIARLSPDDAQFVQVIHANGAGLLDGGLGMFDAVGHLDFYPNGGQYQPGCSGFWGAVTGIISSGLGDVSSKVTCNHWRPIELYWESFAPQNCKFESFPCDTFDNFRKGLCRTPQYNNLGSDMDFYYDQKPSQYKQFYMTSATTPFCSKHIYVSIESPKYGWDTMGMVNVTLTDAVGQSLSVMVLDNEYLK…	0.27	0.27
	EES11	EZ761946	contig22025:104:1296:2|similar to Group XV phospholipase A2 (Q8VEB4)|Evalue: 3e-59	122	44681	3	8.3	397	8.65	MWSIAHLCLIVTFCSICEDVHAASFLDKLFNKKPNANLPAGNAEENLNLSPVILLPGFGGSQLRGKKKRTSVPHALCTKNSDWFTIWPSPRVVNPAQVACWADDVSLVWDPITRTIGNQPGVEIEVPGFGTVDKMKWMHPLIKIKKTRYFIDIIDMLVAMGLEXNYSIRGAPFDFRYPPASNKAFFPLLRNLVEETYEANQKRKITLIGHSMGAVYALYLLNNAEQGWKDKYIHNFVSLGGPWAGSVKTMKGFVNGDAVNLPLIKDIDLRPALRSFPGFASVIPTSGPIWNSLLRSFAIXVENKNYTLSNIKEFFVDIGDPIAYEFYLNASVGLNNIDQKSPGVPTRCIYGKGMLTPESYKYYGFPLSEPETDFGDGDGTVNYASLQACKLWKDKQK	0.24	0.24
	TS12	EZ761946	contig22025:104:1296:2|similar to Group XV phospholipase A2 (Q8VEB4)|Evalue: 3e-59	371	44681	11 (9)	32.5	397	8.65	MWSIAHLCLIVTFCSICEDVHAASFLDKLFNKKPNANLPAGNAEENLNLSPVILLPGFGGSQLRGKKKRTSVPHALCTKNSDWFTIWPSPRVVNPAQVACWADDVSLVWDPITRTIGNQPGVEIEVPGFGTVDKMKWMHPLIKIKKTRYFIDIIDMLVAMGLEXNYSIRGAPFDFRYPPASNKAFFPLLRNLVEETYEANQKRKITLIGHSMGAVYALYLLNNAEQGWKDKYIHNFVSLGGPWAGSVKTMKGFVNGDAVNLPLIKDIDLRPALRSFPGFASVIPTSGPIWNSLLRSFAIXVENKNYTLSNIKEFFVDIGDPIAYEFYLNASVGLNNIDQKSPGVPTRCIYGKGMLTPESYKYYGFPLSEPETDFGDGDGTVNYASLQACKLWKDKQK	0.9	0.9
	AS15	EZ761780	contig20744:89:1051:2|similar to Group 3 secretory phospholipase A2 (Q9NZ20)|Evalue: 5e-07	83	37569	2	7.8	320	6.11	MYRHIWHVLLLVIPYMSVAVCKLDESVIRRVSDAFTKSNEVLRQYSDGQATVTAFFTADLKLIECHLDKSSATLTRDLFNQAVENPLKEEQFLSEADVARIGRTCRKFLRDLARVPKTEVTPLQLKTVTRQSLDYPTKSTDFCSRQAVHVPDVPTSDAKDSATKDRLASTNKNENTQMKKELRSSEDSEGLPKEDDSTAKQTVEVKEALVVNALDVCCKVWQKCPETIPPLEHKNGLFNPYFWPLRSCQCEQQFKSCLTSLLQSDEHKERHEEAATFMAAYFDELNPKCFIETTVEKCVEYDFWFHRCLDKQQKVQYSIK	0.18	0.18
	TS15	EZ761780	contig20744:89:1051:2|similar to Group 3 secretory phospholipase A2 (Q9NZ20)|Evalue: 5e-07	59	37569	2	5	320	6.11	MYRHIWHVLLLVIPYMSVAVCKLDESVIRRVSDAFTKSNEVLRQYSDGQATVTAFFTADLKLIECHLDKSSATLTRDLFNQAVENPLKEEQFLSEADVARIGRTCRKFLRDLARVPKTEVTPLQLKTVTRQSLDYPTKSTDFCSRQAVHVPDVPTSDAKDSATKDRLASTNKNENTQMKKELRSSEDSEGLPKEDDSTAKQTVEVKEALVVNALDVCCKVWQKCPETIPPLEHKNGLFNPYFWPLRSCQCEQQFKSCLTSLLQSDEHKERHEEAATFMAAYFDELNPKCFIETTVEKCVEYDFWFHRCLDKQQKVQYSIK	0.09	0.09
	AS14, 15	EZ761744	contig20561:1:604:1|similar to Gastric triacylglycerol lipase (Q9CPP7)|Evalue: 7e-53	136	22984	4	20.4	201	8.93	ILADEGYDVWLGNMRGNDYGLGHIRYSIKSKEFWDFSFDEMAHYDLPAIIDKALAVSGQQKVIYVGHSQGTLVGFAKFSADYEFSKKIKLFAALAPVAYLKNVKSPLIRLLSPFSQQLDKLFRIFGYRDFLPDYWIIKYLGRTFCSQSTLPQKICENVFFLLAGFDYKQLNGSRLDVYLGHTPSGTSTQNVFHFAQLTKSG	0.5	0.65
	AS8, 4	EZ760687	contig11754:1:2273:3|similar to 85 kDa calcium-independent phospholipase A2 (O60733)|Evalue: 3e-121	120	83989	3	6.1	756	5.03	KESAVFCIFRSPSQATATEEMNMLHPTVSELCEVAITDFYTVSNIKNVCSYIGSNRDQLDVHLAAFFGWLEVWSLDQFKSKIDAQVPSSGETPLHIAIRQQHGELVKVLLDLECSVDIVNKDKDSVFHYAAITTVEILDDLGKRKSPMVNSVNEAGQQPLILACQSSEKTKVDLALKLLTIGADLGQDSAIPALKTXDNEQAQIETGLAFANXFPDLLDASGVKFGGTPLHWVKSKAAILKFLEYNVNVEGRNDIGETALHIMVMKNRLDCVITLLSHGAGLRSLDNKGNTPLHTAVILSNIEVVKALIIFGADITLQNLNGESPLQLAEQTTVPKRRDDLLLALSVACGSEEITTDPVINEYRDKVHDDMKSKGQLPDEELPAGLQPDPDIEILETSS…	0.12	0.16
	EES9, 8, 12, 13	EZ760647	contig11454:1:1130:3|similar to Hepatic triacylglycerol lipase (P11150)|Evalue: 3e-34	409	42043	12 (8)	30.9	375	6.15	DYWRAAGNTPMIGAQLAKTIQALVQLKGTTPSKIELIGYSLGAQVSCIYGRKXLKEYGVNTHIXSRITGLDPAGPLFEGSDPIARLSPDDAQFVQVIHTSGAGLLDGGLGMFEAVGHLDFYPNGGQHQPGCSGFLGVISGIIKFLVLALXSSTYTCNHWRPIELYWESFAPQNCKFESFPCDTFENFKKGLCRTPQYNNLGSAMDFYYEQKPSQYKQFYMTSATTPFCSKHIYVGIDSSKYGWQTSGYVNVTLMDAAGKAVSLMVLDNETLMPGSTAAMVAISNIRAEDVVSVRIGYSGTCSWLGSWSCWNTLKLSALHIESMDGSVKKVACADGGITLSNYXNFHYSYCEEWESVLKKEKENLLCHCTQYTVLW	0.98	1.22
	AS16	EZ760557	contig10509:753:1454:3|similar to Monoglyceride lipase (O35678)|Evalue: 3e-50	95	26383	2	12.8	234	6.3	MESTDAAEIADERILSFDNHRIFCRYWKKPDSTKKPRALVFICHGLGEHCDTYEPLVAALQNADFFVFGHDHLGHGRSSGPRVTIDDLQIYADHVLQHIDLMQKRFPDLPLFIVGHSMGGAISIMTGLKRPDFCKGMVLLGPAVVAGEEATATKRFLARILSRVYPSFAVGKIRIDDLSVDETVKERFRTDPLIYRGDIGAGFGNALLNAMDLIGSNYQNITWPFFCVQGGQDK	0.27	0.27
	AS8	EZ760336	contig08576:1:1802:3|similar to Phospholipase A-2-activating protein (Q6GM65)|Evalue: 1e-102	356	65934	7	18.5	600	5.52	MVNMLLRQVLRTKHTIWSKNGHHLRTLIGHTDVVRALICPKVNELLSCSNDATIRRWNVMDGTCLFSYFGHKNYIYSMALLPQNMFVSCGEDRSVCVWAEATQSPLQTIATPVLSVWAVATFQNSDIAAGGSDGTIMIFTADSRRMASEADQRSFEETVAASTHSTTDVMEGVKTEDLPSEAALIEPGTKEGQMKIIRRSNQVEVYNWSASENEWKKIGDVVGSSGGTTKTSGKVLYQGKEYDYVFSVDFDENRPAIKLPYNISQDPWIVAQKFLEDNDLPQAYLEQVASFITKNAPNAGQNAPISGYADPFTGSGRYVPGGPSASTAAGIGPFLQAVEGXYAFGRSTDAPTAAAVDPFTGASSYKSAAATAASVPSTPNQFYPQRTYLSFAIANLSAV…	0.41	0.41
	EES7	EZ760336	contig08576:1:1802:3|similar to Phospholipase A-2-activating protein (Q6GM65)|Evalue: 1e-102	428	65934	7	18.5	600	5.52	MVNMLLRQVLRTKHTIWSKNGHHLRTLIGHTDVVRALICPKVNELLSCSNDATIRRWNVMDGTCLFSYFGHKNYIYSMALLPQNMFVSCGEDRSVCVWAEATQSPLQTIATPVLSVWAVATFQNSDIAAGGSDGTIMIFTADSRRMASEADQRSFEETVAASTHSTTDVMEGVKTEDLPSEAALIEPGTKEGQMKIIRRSNQVEVYNWSASENEWKKIGDVVGSSGGTTKTSGKVLYQGKEYDYVFSVDFDENRPAIKLPYNISQDPWIVAQKFLEDNDLPQAYLEQVASFITKNAPNAGQNAPISGYADPFTGSGRYVPGGPSASTAAGIGPFLQAVEGXYAFGRSTDAPTAAAVDPFTGASSYKSAAATAASVPSTPNQFYPQRTYLSFAIANLSAV…	0.41	0.41
	TS8	EZ760336	contig08576:1:1802:3|similar to Phospholipase A-2-activating protein (Q6GM65)|Evalue: 1e-102	240	65934	5	12.5	600	5.52	MVNMLLRQVLRTKHTIWSKNGHHLRTLIGHTDVVRALICPKVNELLSCSNDATIRRWNVMDGTCLFSYFGHKNYIYSMALLPQNMFVSCGEDRSVCVWAEATQSPLQTIATPVLSVWAVATFQNSDIAAGGSDGTIMIFTADSRRMASEADQRSFEETVAASTHSTTDVMEGVKTEDLPSEAALIEPGTKEGQMKIIRRSNQVEVYNWSASENEWKKIGDVVGSSGGTTKTSGKVLYQGKEYDYVFSVDFDENRPAIKLPYNISQDPWIVAQKFLEDNDLPQAYLEQVASFITKNAPNAGQNAPISGYADPFTGSGRYVPGGPSASTAAGIGPFLQAVEGXYAFGRSTDAPTAAAVDPFTGASSYKSAAATAASVPSTPNQFYPQRTYLSFAIANLSAV…	0.28	0.28
	AS12, 9	EZ760255	contig07969:1:1665:1|similar to Phospholipase D3 (Q6PB03)|Evalue: 4e-101	48	63091	1	2	554	8.76	VLTIARAXATITFPTNSFTVSSDFSLSFQTVLSAQNRADFVALELELANDSRNKYHXKPDHSERKHKVAPWCFPVTIMIFLILLIVFLPFITSDKADLIKSKFGTVCTDKCRLSLTESIPRHLKYPSDTPLFPSTFSTWLQLIETAQNSIDIGSFYWELNNKTVQSRKYLALPEIVRQGPPHEGQQMFKLLVKAGTQRNIRIRIAQSEPNYQFPDHDTAVLEKMGAAEVRSLNFTNLLGDGVLHTKMWLVDGKHFYIGSANFDWRSLTEVKELGIAGFNCSCLGDDLMKIFQTYWFLGGPKAQIPVNWPSSYQTSFNMTTPMYISYNDSVIPFSAVLSSSPPAFCADGRSKDIDAILDVINNAKKFVYIAVMNFIPVNEYKRKQSYWPLIDNALRNAAL…	0.05	0.1
Transporters
Lipid transport
Large lipid transporter protein family	AS9, 4-18	EZ763003	contig26360:1:1109:3|similar to Vitellogenin-2 (P05690)|Evalue: 2e-12	1020	42088	35 (19)	57.3	368	6.79	ADRQEGAYFTPACIEFVKQHTDYLLYKFNVEYTKLSRPTLKLLQKVEQVLHYMYYWNTNVDEVDVYPEQPISQTPADKQMKKFNATIAFSADRRYVNAYYNTTTKKVSMINLRLPREVTPLSAIIPFRPSHFLAFDAPSFCTITGNKMTTYDGLHSEMPLSECYHLMTKDNSPDELFAVLAANIKAQAGPQELNKKIMVVLPGHSIEITAPQGRTPSKVSDYQIVINGQPITEQLSANKPITVPPQTPEHQSIAYITLVNPESDGDKEPIIAVISRVAKFRVHFDGKTIVVLPSIYYKNDLAGLCGNYNNVAFGDDVLPESLSTERQMERAEDEYEWSRAFIVQKDNCKADIPQDKKTNLRQSKSKRN	4.28	33.27
	EES6, 3-19	EZ763003	contig26360:1:1109:3|similar to Vitellogenin-2 (P05690)|Evalue: 2e-12	980	42088	40 (17)	53.8	368	6.79	ADRQEGAYFTPACIEFVKQHTDYLLYKFNVEYTKLSRPTLKLLQKVEQVLHYMYYWNTNVDEVDVYPEQPISQTPADKQMKKFNATIAFSADRRYVNAYYNTTTKKVSMINLRLPREVTPLSAIIPFRPSHFLAFDAPSFCTITGNKMTTYDGLHSEMPLSECYHLMTKDNSPDELFAVLAANIKAQAGPQELNKKIMVVLPGHSIEITAPQGRTPSKVSDYQIVINGQPITEQLSANKPITVPPQTPEHQSIAYITLVNPESDGDKEPIIAVISRVAKFRVHFDGKTIVVLPSIYYKNDLAGLCGNYNNVAFGDDVLPESLSTERQMERAEDEYEWSRAFIVQKDNCKADIPQDKKTNLRQSKSKRN	4.69	25.45
	TS6, 4-19	EZ763003	contig26360:1:1109:3|similar to Vitellogenin-2 (P05690)|Evalue: 2e-12	1079	42088	46 (19)	56	368	6.79	ADRQEGAYFTPACIEFVKQHTDYLLYKFNVEYTKLSRPTLKLLQKVEQVLHYMYYWNTNVDEVDVYPEQPISQTPADKQMKKFNATIAFSADRRYVNAYYNTTTKKVSMINLRLPREVTPLSAIIPFRPSHFLAFDAPSFCTITGNKMTTYDGLHSEMPLSECYHLMTKDNSPDELFAVLAANIKAQAGPQELNKKIMVVLPGHSIEITAPQGRTPSKVSDYQIVINGQPITEQLSANKPITVPPQTPEHQSIAYITLVNPESDGDKEPIIAVISRVAKFRVHFDGKTIVVLPSIYYKNDLAGLCGNYNNVAFGDDVLPESLSTERQMERAEDEYEWSRAFIVQKDNCKADIPQDKKTNLRQSKSKRN	4.28	30.89
	AS6, 4-19	EZ762991	contig26295:1:531:2|similar to Vitellogenin-6 (P18948)|Evalue: 4e-16	338	20178	26 (5)	64.2	176	4.84	DEEKIQWLKSIKNMGLPEFIPQLEQIIEDESLPVYIRTQAIYALVHMIHVAPQEVYQILLPIYHTTTIPYQLRIAAYSVVIYSQPPIDVLQSIAQKVNQEPILEVASYVYSSMSTIANLSDPCIKNFTQDLRTVLYTVAPVNTDLTHSKNIHYGMWSEYLKQGIFMEIATTADLDS	4.44	37.64
	EES6, 1-20	EZ762991	contig26295:1:531:2|similar to Vitellogenin-6 (P18948)|Evalue: 4e-16	376	20178	73 (6)	68.2	176	4.84	DEEKIQWLKSIKNMGLPEFIPQLEQIIEDESLPVYIRTQAIYALVHMIHVAPQEVYQILLPIYHTTTIPYQLRIAAYSVVIYSQPPIDVLQSIAQKVNQEPILEVASYVYSSMSTIANLSDPCIKNFTQDLRTVLYTVAPVNTDLTHSKNIHYGMWSEYLKQGIFMEIATTADLDS	24.35	76.29
	TS7, 4-19	EZ762991	contig26295:1:531:2|similar to Vitellogenin-6 (P18948)|Evalue: 4e-16	349	20178	58 (5)	64.2	176	4.84	DEEKIQWLKSIKNMGLPEFIPQLEQIIEDESLPVYIRTQAIYALVHMIHVAPQEVYQILLPIYHTTTIPYQLRIAAYSVVIYSQPPIDVLQSIAQKVNQEPILEVASYVYSSMSTIANLSDPCIKNFTQDLRTVLYTVAPVNTDLTHSKNIHYGMWSEYLKQGIFMEIATTADLDS	10.74	40.05
	AS7, 4-19	EZ762594	contig24586:1:771:2|similar to Vitellogenin-6 (P18948)|Evalue: 5e-10	725	29873	60 (12)	55.5	256	5.36	EQKKIEGSLLVDTLSMLPMRLRKIDPTMIEKLYTLCNSMFKGPQELHFAERSCWLAYGTIVHKACAHKHFNPQQWNEVKDTTSNTENKPMKSRKLAXXEKEQASTAEPQTSQEEEQYDNPWCPQXNQDEIVERSNSAWKQMNTEELKIGWLKSIKNMGLPEFIPQLEEIIKDETLPTYIRTQAIYALVQMIDLAEQEVYQILLPIFHTTTIPYQLRIAAYTVMIHGQPPIDILQSIAQKINQEPILEVASYVYSSM	20.4	55.07
	EES6, 3-20	EZ762594	contig24586:1:771:2|similar to Vitellogenin-6 (P18948)|Evalue: 5e-10	629	29873	60 (11)	48.8	256	5.36	EQKKIEGSLLVDTLSMLPMRLRKIDPTMIEKLYTLCNSMFKGPQELHFAERSCWLAYGTIVHKACAHKHFNPQQWNEVKDTTSNTENKPMKSRKLAXXEKEQASTAEPQTSQEEEQYDNPWCPQXNQDEIVERSNSAWKQMNTEELKIGWLKSIKNMGLPEFIPQLEEIIKDETLPTYIRTQAIYALVQMIDLAEQEVYQILLPIFHTTTIPYQLRIAAYTVMIHGQPPIDILQSIAQKINQEPILEVASYVYSSM	13.03	34.26
	TS7, 4-19	EZ762594	contig24586:1:771:2|similar to Vitellogenin-6 (P18948)|Evalue: 5e-10	849	29873	86 (14)	60.2	256	5.36	EQKKIEGSLLVDTLSMLPMRLRKIDPTMIEKLYTLCNSMFKGPQELHFAERSCWLAYGTIVHKACAHKHFNPQQWNEVKDTTSNTENKPMKSRKLAXXEKEQASTAEPQTSQEEEQYDNPWCPQXNQDEIVERSNSAWKQMNTEELKIGWLKSIKNMGLPEFIPQLEEIIKDETLPTYIRTQAIYALVQMIDLAEQEVYQILLPIFHTTTIPYQLRIAAYTVMIHGQPPIDILQSIAQKINQEPILEVASYVYSSM	31.66	60.25
	AS6, 3-26	EZ760059	contig06595:1:952:2|similar to Vitellogenin-1 (P87498)|Evalue: 3e-07	1321	35963	128 (20)	76.3	317	9.92	VPRAAKLRVRTNIDERSVELLEFGYETEGFGQNIRNYIGNLTREALSAVTGGRRSSHSRNTRQTSQPTQINMADINSKLKIKPIVPKEMRGSAYLKIFGEETRFAVVNPDTVGRFLVELFGQSQQALTKLTGEGYKIENRRALYPQFELQMPTVFGVPVYMWNRFPLVASMKGKVKVQMEPKPQNIDFSLLQHMPETVKIDTDFTTTLDGQHVYSLGVYAGFIKVATGITTKVSIEVPVKGSLLFRPAENLTKFTWDIPEKPTELLKIQKFPTTIVRKYTNKPPSFKPQSDRADRAPLKHNTRCLLSTLNLRMTSTT	30.12	107.89
	EES6, 1-25	EZ760059	contig06595:1:952:2|similar to Vitellogenin-1 (P87498)|Evalue: 3e-07	1239	35963	224 (19)	71.3	317	9.92	VPRAAKLRVRTNIDERSVELLEFGYETEGFGQNIRNYIGNLTREALSAVTGGRRSSHSRNTRQTSQPTQINMADINSKLKIKPIVPKEMRGSAYLKIFGEETRFAVVNPDTVGRFLVELFGQSQQALTKLTGEGYKIENRRALYPQFELQMPTVFGVPVYMWNRFPLVASMKGKVKVQMEPKPQNIDFSLLQHMPETVKIDTDFTTTLDGQHVYSLGVYAGFIKVATGITTKVSIEVPVKGSLLFRPAENLTKFTWDIPEKPTELLKIQKFPTTIVRKYTNKPPSFKPQSDRADRAPLKHNTRCLLSTLNLRMTSTT	39.54	206.56
	TS6, 4-26	EZ760059	contig06595:1:952:2|similar to Vitellogenin-1 (P87498)|Evalue: 3e-07	1191	35963	204 (20)	70	317	9.92	VPRAAKLRVRTNIDERSVELLEFGYETEGFGQNIRNYIGNLTREALSAVTGGRRSSHSRNTRQTSQPTQINMADINSKLKIKPIVPKEMRGSAYLKIFGEETRFAVVNPDTVGRFLVELFGQSQQALTKLTGEGYKIENRRALYPQFELQMPTVFGVPVYMWNRFPLVASMKGKVKVQMEPKPQNIDFSLLQHMPETVKIDTDFTTTLDGQHVYSLGVYAGFIKVATGITTKVSIEVPVKGSLLFRPAENLTKFTWDIPEKPTELLKIQKFPTTIVRKYTNKPPSFKPQSDRADRAPLKHNTRCLLSTLNLRMTSTT	19.03	97.94
	AS6, 3-20	EZ760037	contig06373:1:1480:1|similar to Vitellogenin-4 (P18947)|Evalue: 9e-11	1689	56002	126 (24)	67.5	493	6.01	GRDIDTQFAGLPIPDVEVWEIPTNNFTKAAVYNFTAGHESLGVKVNVDALSTYPIGTPYKAIFPIGHKGYLRILTKPTGQSKSLTVSMYEKREVVKTSEKELINKLKDKMPNLELKDTQAKLSPPSNYETAKKYGYSLQFFVQPSSTPSHQQQARETQPGQVPTDYQMRLFLGIVYSWDMLYAKSFAMLENKLPAGPKVACFTGEMRAPDRTGLWYLTPQTPALKPIEGLAEINYGQQCTENKIRIHLKAEQSGEQLNLNKQDLYDEFGTPLAYTVAHEAHEAEGLFQSLYKKCEEDRQIGAYFTEACVDFVKTYTDYLVYKINVEYTHISRPTLKLLQKAEQIALHMYYYNTYIDEVDVYPEHPTSQSASANQPRKFNATIAFGPGRRYVNVYYNTTT…	14.47	60.6
	EES6, 1-24	EZ760037	contig06373:1:1480:1|similar to Vitellogenin-4 (P18947)|Evalue: 9e-11	1845	56002	157 (25)	68.4	493	6.01	GRDIDTQFAGLPIPDVEVWEIPTNNFTKAAVYNFTAGHESLGVKVNVDALSTYPIGTPYKAIFPIGHKGYLRILTKPTGQSKSLTVSMYEKREVVKTSEKELINKLKDKMPNLELKDTQAKLSPPSNYETAKKYGYSLQFFVQPSSTPSHQQQARETQPGQVPTDYQMRLFLGIVYSWDMLYAKSFAMLENKLPAGPKVACFTGEMRAPDRTGLWYLTPQTPALKPIEGLAEINYGQQCTENKIRIHLKAEQSGEQLNLNKQDLYDEFGTPLAYTVAHEAHEAEGLFQSLYKKCEEDRQIGAYFTEACVDFVKTYTDYLVYKINVEYTHISRPTLKLLQKAEQIALHMYYYNTYIDEVDVYPEHPTSQSASANQPRKFNATIAFGPGRRYVNVYYNTTT…	20.79	107.82
	TS6, 2-21	EZ760037	contig06373:1:1480:1|similar to Vitellogenin-4 (P18947)|Evalue: 9e-11	1826	56002	195 (25)	67.7	493	6.01	GRDIDTQFAGLPIPDVEVWEIPTNNFTKAAVYNFTAGHESLGVKVNVDALSTYPIGTPYKAIFPIGHKGYLRILTKPTGQSKSLTVSMYEKREVVKTSEKELINKLKDKMPNLELKDTQAKLSPPSNYETAKKYGYSLQFFVQPSSTPSHQQQARETQPGQVPTDYQMRLFLGIVYSWDMLYAKSFAMLENKLPAGPKVACFTGEMRAPDRTGLWYLTPQTPALKPIEGLAEINYGQQCTENKIRIHLKAEQSGEQLNLNKQDLYDEFGTPLAYTVAHEAHEAEGLFQSLYKKCEEDRQIGAYFTEACVDFVKTYTDYLVYKINVEYTHISRPTLKLLQKAEQIALHMYYYNTYIDEVDVYPEHPTSQSASANQPRKFNATIAFGPGRRYVNVYYNTTT…	13.61	56.55
	AS7, 5-19	EZ759328	contig02294:1:661:1|similar to Vitellogenin-4 (P18947)|Evalue: 5e-11	774	25352	59 (12)	73.2	220	4.85	GKDLMQIEKVFVGSIHERFVSEPMTLIPTAFVEPIPSSEAPFEEVLKKPIRFNYENGKVKEFETTEEDPSWSINMKRAILTTFHLSLNDKEESAFRQPYPTSNGQPLKKDQDNEYPQLFTVMEDGAAGRCEASYVVLQTPDSDEFVFPQIETVNAGRPIPIPRPTNAQVLNVTKSYNFKNCEYRPFYAYGMHLSGICPTCEDKPEEWSDLIEASAHTRYN	31.18	95.06
	EES6, 4-22	EZ759328	contig02294:1:661:1|similar to Vitellogenin-4 (P18947)|Evalue: 5e-11	664	25352	54 (11)	73.2	220	4.85	GKDLMQIEKVFVGSIHERFVSEPMTLIPTAFVEPIPSSEAPFEEVLKKPIRFNYENGKVKEFETTEEDPSWSINMKRAILTTFHLSLNDKEESAFRQPYPTSNGQPLKKDQDNEYPQLFTVMEDGAAGRCEASYVVLQTPDSDEFVFPQIETVNAGRPIPIPRPTNAQVLNVTKSYNFKNCEYRPFYAYGMHLSGICPTCEDKPEEWSDLIEASAHTRYN	21.18	65.94
	TS7, 4-20	EZ759328	contig02294:1:661:1|similar to Vitellogenin-4 (P18947)|Evalue: 5e-11	782	25352	69 (12)	73.2	220	4.85	GKDLMQIEKVFVGSIHERFVSEPMTLIPTAFVEPIPSSEAPFEEVLKKPIRFNYENGKVKEFETTEEDPSWSINMKRAILTTFHLSLNDKEESAFRQPYPTSNGQPLKKDQDNEYPQLFTVMEDGAAGRCEASYVVLQTPDSDEFVFPQIETVNAGRPIPIPRPTNAQVLNVTKSYNFKNCEYRPFYAYGMHLSGICPTCEDKPEEWSDLIEASAHTRYN	40.23	73.72
	AS7, 4-19	EZ759327	contig02293:1:648:1|similar to Vitellogenin-6 (P18948)|Evalue: 5e-14	810	24857	72 (10)	51.4	216	4.86	ERFVSEPLSLIPTAFVEPIPETNAIFEEVLKKPIRFNYENGKVKEFETTEEDPSWSINMKRAILTTFHLSLNDKEESAFSQPFETRYGGQSASFKKSQSEDNEYPQFFTVMEDGAAGRCEASYTVLQTPDSDEFVYPQLETVNAGRPIPIPRPTNAQVLNVTKSYNFKNCEYRPFYVHGMHMSGLCPTCEEKPEEWADLIEATAHTRYNISGTAQK	42.96	134.37
	EES6, 2-23, 27	EZ759327	contig02293:1:648:1|similar to Vitellogenin-6 (P18948)|Evalue: 5e-14	787	24857	109 (11)	69.4	216	4.86	ERFVSEPLSLIPTAFVEPIPETNAIFEEVLKKPIRFNYENGKVKEFETTEEDPSWSINMKRAILTTFHLSLNDKEESAFSQPFETRYGGQSASFKKSQSEDNEYPQFFTVMEDGAAGRCEASYTVLQTPDSDEFVYPQLETVNAGRPIPIPRPTNAQVLNVTKSYNFKNCEYRPFYVHGMHMSGLCPTCEEKPEEWADLIEATAHTRYNISGTAQK	81.58	219.67
	TS7, 4-27	EZ759327	contig02293:1:648:1|similar to Vitellogenin-6 (P18948)|Evalue: 5e-14	790	24857	103 (10)	51.4	216	4.86	ERFVSEPLSLIPTAFVEPIPETNAIFEEVLKKPIRFNYENGKVKEFETTEEDPSWSINMKRAILTTFHLSLNDKEESAFSQPFETRYGGQSASFKKSQSEDNEYPQFFTVMEDGAAGRCEASYTVLQTPDSDEFVYPQLETVNAGRPIPIPRPTNAQVLNVTKSYNFKNCEYRPFYVHGMHMSGLCPTCEEKPEEWADLIEATAHTRYNISGTAQK	48.87	113.52
	AS7, 4-19	EZ759329	contig02295:455:757:2|hypothetical protein BRAFLDRAFT_69973 [Branchiostoma floridae] (XP_002591410.1)|Evalue: 8e-04	290	11684	32 (5)	52.5	101	6.82	MRFTLFILFSLFLGGCLSAVTRGQPGKASEEQYRHEHEEQWSSVYPQLRQAKYNDVKSFEDGKEFKYLYEGQILTGMPDTHQQYSGLRIRAIVNIQIGAAN	12.28	58.29	nr
	EES6, 3-23	EZ759329	contig02295:455:757:2|hypothetical protein BRAFLDRAFT_69973 [Branchiostoma floridae] (XP_002591410.1)|Evalue: 8e-04	317	11684	33 (5)	52.5	101	6.82	MRFTLFILFSLFLGGCLSAVTRGQPGKASEEQYRHEHEEQWSSVYPQLRQAKYNDVKSFEDGKEFKYLYEGQILTGMPDTHQQYSGLRIRAIVNIQIGAAN	12.28	72.73	nr
	TS7, 4-19	EZ759329	contig02295:455:757:2|hypothetical protein BRAFLDRAFT_69973 [Branchiostoma floridae] (XP_002591410.1)|Evalue: 8e-04	275	11684	34 (4)	43.6	101	6.82	MRFTLFILFSLFLGGCLSAVTRGQPGKASEEQYRHEHEEQWSSVYPQLRQAKYNDVKSFEDGKEFKYLYEGQILTGMPDTHQQYSGLRIRAIVNIQIGAAN	9.25	47.7	nr
	AS5, 2-20	EZ759740	contig04531:1:1454:1|similar to Apolipophorins (Q9U943)|Evalue: 7e-11	2337	55650	168 (33)	68.6	484	6.86	KAIANLGEVTQVLQGQYNVEQKLLNCVINKNLPTNVSIAAVAALQRQEPLERTTTDRLFTVLSDQERDPLLRMVICMRTLHTVSDPTSIRNILKLIDTEKNEQVKAYMVSHIKGMMSSDVPHHKMAARVIHQVIQERGRPLPHTRARFPQSSYFELSKFFKAPVSGLKNNGEFGGQIETSFIFEEDSHIPRYWNLNVTAASFSKYVQLLEVDVDMKNVDDLIASVYNTQGRGSFAFINTLREKLKRTVKTVVRQVVRVKSARAVISKIFEVASNLEPEAMVNTVFSKIDNYNYSDFIELLSQLKKVNVGEVLNTIMKMLPQNSDIHRMGQAVRNINFDQLDTEKVIEVLTTIGFSEFKVRFVLRKMEEAGIDLDAAFKTLQNFNIEKLQQKLQNFRVQD…	73.69	148.6
	EES5, 1-25	EZ759740	contig04531:1:1454:1|similar to Apolipophorins (Q9U943)|Evalue: 7e-11	2516	55650	384 (35)	71.7	484	6.86	KAIANLGEVTQVLQGQYNVEQKLLNCVINKNLPTNVSIAAVAALQRQEPLERTTTDRLFTVLSDQERDPLLRMVICMRTLHTVSDPTSIRNILKLIDTEKNEQVKAYMVSHIKGMMSSDVPHHKMAARVIHQVIQERGRPLPHTRARFPQSSYFELSKFFKAPVSGLKNNGEFGGQIETSFIFEEDSHIPRYWNLNVTAASFSKYVQLLEVDVDMKNVDDLIASVYNTQGRGSFAFINTLREKLKRTVKTVVRQVVRVKSARAVISKIFEVASNLEPEAMVNTVFSKIDNYNYSDFIELLSQLKKVNVGEVLNTIMKMLPQNSDIHRMGQAVRNINFDQLDTEKVIEVLTTIGFSEFKVRFVLRKMEEAGIDLDAAFKTLQNFNIEKLQQKLQNFRVQD…	131.75	434.48
	TS5, 4-20	EZ759740	contig04531:1:1454:1|similar to Apolipophorins (Q9U943)|Evalue: 7e-11	2142	55650	239 (32)	70.2	484	6.86	KAIANLGEVTQVLQGQYNVEQKLLNCVINKNLPTNVSIAAVAALQRQEPLERTTTDRLFTVLSDQERDPLLRMVICMRTLHTVSDPTSIRNILKLIDTEKNEQVKAYMVSHIKGMMSSDVPHHKMAARVIHQVIQERGRPLPHTRARFPQSSYFELSKFFKAPVSGLKNNGEFGGQIETSFIFEEDSHIPRYWNLNVTAASFSKYVQLLEVDVDMKNVDDLIASVYNTQGRGSFAFINTLREKLKRTVKTVVRQVVRVKSARAVISKIFEVASNLEPEAMVNTVFSKIDNYNYSDFIELLSQLKKVNVGEVLNTIMKMLPQNSDIHRMGQAVRNINFDQLDTEKVIEVLTTIGFSEFKVRFVLRKMEEAGIDLDAAFKTLQNFNIEKLQQKLQNFRVQD…	65.57	131.78
	AS7, 4-10, 12	EZ763107	contig26982:1:1617:2|similar to Microsomal triglyceride transfer protein large subunit (P55158)|Evalue: 4e-31	650	59679	16 (13)	22.5	538	6.51	VLKTISQQKKVKKQTINFILDAIAASQSLDGFSAVIEMFNSTKRTDLDMDYLAFYFNSISFVVRPKATLIDRLMKAFDDIQVSLEFEENIALALGSLGFRLQTTDAHTLKDKILDLLVKKLNDCQDPEINTCRVTFLRAIGNLGDVRSLSTLLRHIKVFGRPSLAAIKALRRISLSHITSDETRTLQNALLDVWEQRTMIYDSSSRLAAVDWLLTHSISTEVCGRIIAVLPRESNVEVASFVWSRLKEFAQPSVIRNALIRAAQLNEKANYASLAAKGQSMTFEGLMHRNGSLSATYNLALEMENGAMKTSAVDVTLNHTNSLFQVISFGLYSHGLSSFLGSTDSDAQTQEDESASAGLNLDVMEVSLPSFVFFNGLSELMSLAWSASADKPVADVQMN…	1.01	1.88
	TS7, 4-7, 9-12	EZ763107	contig26982:1:1617:2|similar to Microsomal triglyceride transfer protein large subunit (P55158)|Evalue: 4e-31	585	59679	18 (10)	20.4	538	6.51	VLKTISQQKKVKKQTINFILDAIAASQSLDGFSAVIEMFNSTKRTDLDMDYLAFYFNSISFVVRPKATLIDRLMKAFDDIQVSLEFEENIALALGSLGFRLQTTDAHTLKDKILDLLVKKLNDCQDPEINTCRVTFLRAIGNLGDVRSLSTLLRHIKVFGRPSLAAIKALRRISLSHITSDETRTLQNALLDVWEQRTMIYDSSSRLAAVDWLLTHSISTEVCGRIIAVLPRESNVEVASFVWSRLKEFAQPSVIRNALIRAAQLNEKANYASLAAKGQSMTFEGLMHRNGSLSATYNLALEMENGAMKTSAVDVTLNHTNSLFQVISFGLYSHGLSSFLGSTDSDAQTQEDESASAGLNLDVMEVSLPSFVFFNGLSELMSLAWSASADKPVADVQMN…	1.01	1.93
	AS5, 4-20, 23, 24	EZ762460	contig24202:107:1017:2|similar to Apolipoprotein B-100 (P04114)|Evalue: 3e-18	914	33965	47 (15)	62	303	6.71	MARIALLVLCIVASALAGPRRDVSAHLLHALQXDSVFESGQSYEYQYSGRAEVGVGYGDARTVGIGFDCKIQVAIPQPCQYTLKVQSCEVLEREGMPQTPDFATIDQELEYIAQNPTNRQSWRPSDKSQELTQQLSKYPIQAIASNGQIEEVLYNEDEPIWVVNIKKAILDALHLKKDLNQQTQLRRPMSLEPSVHGLCPTHYSSHGQSSKVTVKKDLTACIQAPKPQYMMNPLAAFINTTTIAPLFMKAESHCVYTVEQSAIKSMVCREVHSLFPVPFLKGNLSAADANVTQTLKLIGKSGQ	10.28	47.92
	EES5, 1-24	EZ762460	contig24202:107:1017:2|similar to Apolipoprotein B-100 (P04114)|Evalue: 3e-18	1015	33965	79 (15)	66.7	303	6.71	MARIALLVLCIVASALAGPRRDVSAHLLHALQXDSVFESGQSYEYQYSGRAEVGVGYGDARTVGIGFDCKIQVAIPQPCQYTLKVQSCEVLEREGMPQTPDFATIDQELEYIAQNPTNRQSWRPSDKSQELTQQLSKYPIQAIASNGQIEEVLYNEDEPIWVVNIKKAILDALHLKKDLNQQTQLRRPMSLEPSVHGLCPTHYSSHGQSSKVTVKKDLTACIQAPKPQYMMNPLAAFINTTTIAPLFMKAESHCVYTVEQSAIKSMVCREVHSLFPVPFLKGNLSAADANVTQTLKLIGKSGQ	12.59	106.16
	TS5, 4-19	EZ762460	contig24202:107:1017:2|similar to Apolipoprotein B-100 (P04114)|Evalue: 3e-18	842	33965	62 (13)	49.5	303	6.71	MARIALLVLCIVASALAGPRRDVSAHLLHALQXDSVFESGQSYEYQYSGRAEVGVGYGDARTVGIGFDCKIQVAIPQPCQYTLKVQSCEVLEREGMPQTPDFATIDQELEYIAQNPTNRQSWRPSDKSQELTQQLSKYPIQAIASNGQIEEVLYNEDEPIWVVNIKKAILDALHLKKDLNQQTQLRRPMSLEPSVHGLCPTHYSSHGQSSKVTVKKDLTACIQAPKPQYMMNPLAAFINTTTIAPLFMKAESHCVYTVEQSAIKSMVCREVHSLFPVPFLKGNLSAADANVTQTLKLIGKSGQ	7.53	45.38
	AS5, 2-19	EZ761306	contig18537:1:1312:2| PREDICTED: similar to apolipoprotein B [Strongylocentrotus purpuratus] (XP_800206.2)|Evalue: 1e-07	1373	49479	99 (21)	51.5	437	5.84	PITQRSTRRSHSRSTTDSTNEYDNDSRTPQSKHMRGIDRRQSSGNKGRSSYATDDSDDVELVACIKMLGYELGFLSIHDFKQLPIFSVRDMIRYFKDVVDGFEKQPTIAFKLEAAHPTVTALGIPLTYSLNFTTIASLHVKLNVENNEGVHGSSKIDMKVEPSGVAQLAGGIIVDIPSIHTISVISNTTVKSEFEYRMKLAKSKDTLEIEIEKPDEQLDLLYFNNEMKLSKDEDDFEIFEKQTVRSMETEKCLPSIVEKVTGIKACAELAYSALRGSVMPSGGPYKARFYIESSESEGLKHYRVNARHSTYHQEPIVDSRNRPQHSRSEAHKFDMDFEAPGHRSQRSVKSSFTYNPQRNTASLDMQAPDMSTPRLKFFVHNVTDEDNIFGFESGWDLEY…	17.2	65.75	nr
	EES5, 1-22, 24	EZ761306	contig18537:1:1312:2| PREDICTED: similar to apolipoprotein B [Strongylocentrotus purpuratus] (XP_800206.2)|Evalue: 1e-07	1483	49479	267 (23)	52.2	437	5.84	PITQRSTRRSHSRSTTDSTNEYDNDSRTPQSKHMRGIDRRQSSGNKGRSSYATDDSDDVELVACIKMLGYELGFLSIHDFKQLPIFSVRDMIRYFKDVVDGFEKQPTIAFKLEAAHPTVTALGIPLTYSLNFTTIASLHVKLNVENNEGVHGSSKIDMKVEPSGVAQLAGGIIVDIPSIHTISVISNTTVKSEFEYRMKLAKSKDTLEIEIEKPDEQLDLLYFNNEMKLSKDEDDFEIFEKQTVRSMETEKCLPSIVEKVTGIKACAELAYSALRGSVMPSGGPYKARFYIESSESEGLKHYRVNARHSTYHQEPIVDSRNRPQHSRSEAHKFDMDFEAPGHRSQRSVKSSFTYNPQRNTASLDMQAPDMSTPRLKFFVHNVTDEDNIFGFESGWDLEY…	21.08	141.61	nr
	TS5, 4-19	EZ761306	contig18537:1:1312:2| PREDICTED: similar to apolipoprotein B [Strongylocentrotus purpuratus] (XP_800206.2)|Evalue: 1e-07	1408	49479	141 (21)	51.5	437	5.84	PITQRSTRRSHSRSTTDSTNEYDNDSRTPQSKHMRGIDRRQSSGNKGRSSYATDDSDDVELVACIKMLGYELGFLSIHDFKQLPIFSVRDMIRYFKDVVDGFEKQPTIAFKLEAAHPTVTALGIPLTYSLNFTTIASLHVKLNVENNEGVHGSSKIDMKVEPSGVAQLAGGIIVDIPSIHTISVISNTTVKSEFEYRMKLAKSKDTLEIEIEKPDEQLDLLYFNNEMKLSKDEDDFEIFEKQTVRSMETEKCLPSIVEKVTGIKACAELAYSALRGSVMPSGGPYKARFYIESSESEGLKHYRVNARHSTYHQEPIVDSRNRPQHSRSEAHKFDMDFEAPGHRSQRSVKSSFTYNPQRNTASLDMQAPDMSTPRLKFFVHNVTDEDNIFGFESGWDLEY…	10.59	55.45	nr
LDLR family.	AS9	EZ762231	contig23325:1:1472:3|similar to Very low-density lipoprotein receptor (P35953)|Evalue: 4e-24	151	56392	2	9.2	489	5.83	CSATLRSLTLLILCLCRSAMFFRVFLVIFYAVCVCGAPQPRPTTKAPEYCKSNQLRCNSGHCYLSRYRCDGQRDCKDGSDELNCPSEECSENQFSCGQRCIPISWRCDGDPDCRDGADEDNCDESTCHNELHFWCHNSTQCVPIKWRCDGRVDCGDGTDELNCPMPTIVEKVDHQKVDRPKVTYKRTDQTHAKQVTPRISSTEYGLTSSQEQDEPQHDMLHTSPIENLRSRLAPSLTTKMTTTRVTSTTTRAPTTAASTTTTRARHPCKTTADCNCAQHKVAEGTPICMCVLMQCHFYHMPTVGNKLESAESDEQQVTTMTAPLTTTRRACKSTSDCDCPHSESSAGFCNCFQNTCHYEQWDTIETAPLLPSTHEMTVPRHVSDGALAGIICALVAMIL…	0.12	0.12
	EES19, 8, 9, 11, 15, 20	EZ762231	contig23325:1:1472:3|similar to Very low-density lipoprotein receptor (P35953)|Evalue: 4e-24	399	56392	6 (4)	13.5	489	5.83	CSATLRSLTLLILCLCRSAMFFRVFLVIFYAVCVCGAPQPRPTTKAPEYCKSNQLRCNSGHCYLSRYRCDGQRDCKDGSDELNCPSEECSENQFSCGQRCIPISWRCDGDPDCRDGADEDNCDESTCHNELHFWCHNSTQCVPIKWRCDGRVDCGDGTDELNCPMPTIVEKVDHQKVDRPKVTYKRTDQTHAKQVTPRISSTEYGLTSSQEQDEPQHDMLHTSPIENLRSRLAPSLTTKMTTTRVTSTTTRAPTTAASTTTTRARHPCKTTADCNCAQHKVAEGTPICMCVLMQCHFYHMPTVGNKLESAESDEQQVTTMTAPLTTTRRACKSTSDCDCPHSESSAGFCNCFQNTCHYEQWDTIETAPLLPSTHEMTVPRHVSDGALAGIICALVAMIL…	0.33	1.15
	TS9	EZ762231	contig23325:1:1472:3|similar to Very low-density lipoprotein receptor (P35953)|Evalue: 4e-24	157	56392	3 (2)	9.2	489	5.83	CSATLRSLTLLILCLCRSAMFFRVFLVIFYAVCVCGAPQPRPTTKAPEYCKSNQLRCNSGHCYLSRYRCDGQRDCKDGSDELNCPSEECSENQFSCGQRCIPISWRCDGDPDCRDGADEDNCDESTCHNELHFWCHNSTQCVPIKWRCDGRVDCGDGTDELNCPMPTIVEKVDHQKVDRPKVTYKRTDQTHAKQVTPRISSTEYGLTSSQEQDEPQHDMLHTSPIENLRSRLAPSLTTKMTTTRVTSTTTRAPTTAASTTTTRARHPCKTTADCNCAQHKVAEGTPICMCVLMQCHFYHMPTVGNKLESAESDEQQVTTMTAPLTTTRRACKSTSDCDCPHSESSAGFCNCFQNTCHYEQWDTIETAPLLPSTHEMTVPRHVSDGALAGIICALVAMIL…	0.12	0.12
	AS9,10	EZ761443	contig19083:167:1503:2|similar to Low-density lipoprotein receptor (P35951)|Evalue: 7e-05	705	51426	21 (13)	30.3	445	5.32	MLLNVFLLCFTFVVVTVEGQGRRSTPPPPKNINLAKDPRLKLNSQYRCVVRDDSYRDPDRKKDTAADLIATCNDMFRCVNGIVYKTVCAPGTYFNVIRQSCEVETGKTIKQCNYDTADDFKPATTPMPQVNLTCQQPNQLACASGICIPADRFCDNVNNCGDWSDELLCAPDTDPLAAPLCDPSRCKLPDCYCTADQVPGGIALEDVPQMIVLQFEEAINTNNIPVYNDLLFNANRTNPNGCGLKATFFLTHAYTDYRATKKLFLSGNEIALMGVDNERDEQWWTHAPIDRLEKEYTTERQIVSKFGEFPDDRLAGIRVPFFKSSGNPQFQMMLMNSFRYDSSIAVEPRANPIWPYTLDHKIPHLCYPPKTAQCPTRAYAGVWEVPLNSMINMFQDSCP…	1.54	1.67
	EES8	EZ761443	contig19083:167:1503:2|similar to Low-density lipoprotein receptor (P35951)|Evalue: 7e-05	220	51426	5	13	445	5.32	MLLNVFLLCFTFVVVTVEGQGRRSTPPPPKNINLAKDPRLKLNSQYRCVVRDDSYRDPDRKKDTAADLIATCNDMFRCVNGIVYKTVCAPGTYFNVIRQSCEVETGKTIKQCNYDTADDFKPATTPMPQVNLTCQQPNQLACASGICIPADRFCDNVNNCGDWSDELLCAPDTDPLAAPLCDPSRCKLPDCYCTADQVPGGIALEDVPQMIVLQFEEAINTNNIPVYNDLLFNANRTNPNGCGLKATFFLTHAYTDYRATKKLFLSGNEIALMGVDNERDEQWWTHAPIDRLEKEYTTERQIVSKFGEFPDDRLAGIRVPFFKSSGNPQFQMMLMNSFRYDSSIAVEPRANPIWPYTLDHKIPHLCYPPKTAQCPTRAYAGVWEVPLNSMINMFQDSCP…	0.36	0.36
	TS9, 10	EZ761443	contig19083:167:1503:2|similar to Low-density lipoprotein receptor (P35951)|Evalue: 7e-05	748	51426	22 (13)	36.9	445	5.32	MLLNVFLLCFTFVVVTVEGQGRRSTPPPPKNINLAKDPRLKLNSQYRCVVRDDSYRDPDRKKDTAADLIATCNDMFRCVNGIVYKTVCAPGTYFNVIRQSCEVETGKTIKQCNYDTADDFKPATTPMPQVNLTCQQPNQLACASGICIPADRFCDNVNNCGDWSDELLCAPDTDPLAAPLCDPSRCKLPDCYCTADQVPGGIALEDVPQMIVLQFEEAINTNNIPVYNDLLFNANRTNPNGCGLKATFFLTHAYTDYRATKKLFLSGNEIALMGVDNERDEQWWTHAPIDRLEKEYTTERQIVSKFGEFPDDRLAGIRVPFFKSSGNPQFQMMLMNSFRYDSSIAVEPRANPIWPYTLDHKIPHLCYPPKTAQCPTRAYAGVWEVPLNSMINMFQDSCP…	1.24	1.52
	AS7	EZ759728	contig04458:347:1819:2|similar to Low-density lipoprotein receptor-related protein 5 (O75197)|Evalue: 1e-20	130	56544	2	6.1	490	8.02	MQMRHFMEMRHFHVNGTSHLRTVIREEVQTMSDLIMDKMRDLLTESAQNLSQVLSDYQRNISTQLQQFVQSILDETSCKTSVLPINDSDTRPLRPMLKPSEQSILGFDKHHQLLPDNHVPLLSMPSTRRTERIINNSKNIETIFFKYEQYNISKALYEIPNYLVYAYKKSLRRKAPNPLEHSIIAQEIRVTKNVIRKIATDCQNATLYWSEERGSLHRSNANGTDYVLLRHNEDEDIQGIAVDWINRNIYWSEYLADRILVSGVNTVPKVTGFXIDSGLYAPTQVLVQPLIKKVFWANHRAPASIEMSNLDSSRRSFLVSGRITRISGMTLDFERDNVCWTDEMTDAVECINVNGSNRRLISSSLVSAPFSTFLKRPRDIVAWANFLFLIDHKNHTIKS…	0.12	0.12
	TS7, 8	EZ759728	contig04458:347:1819:2|similar to Low-density lipoprotein receptor-related protein 5 (O75197)|Evalue: 1e-20	62	56544	1	3.3	490	8.02	MQMRHFMEMRHFHVNGTSHLRTVIREEVQTMSDLIMDKMRDLLTESAQNLSQVLSDYQRNISTQLQQFVQSILDETSCKTSVLPINDSDTRPLRPMLKPSEQSILGFDKHHQLLPDNHVPLLSMPSTRRTERIINNSKNIETIFFKYEQYNISKALYEIPNYLVYAYKKSLRRKAPNPLEHSIIAQEIRVTKNVIRKIATDCQNATLYWSEERGSLHRSNANGTDYVLLRHNEDEDIQGIAVDWINRNIYWSEYLADRILVSGVNTVPKVTGFXIDSGLYAPTQVLVQPLIKKVFWANHRAPASIEMSNLDSSRRSFLVSGRITRISGMTLDFERDNVCWTDEMTDAVECINVNGSNRRLISSSLVSAPFSTFLKRPRDIVAWANFLFLIDHKNHTIKS…	0.06	0.12
	AS15, 16	EZ762852	contig25676:1:412:3|similar to Very low-density lipoprotein receptor (P98155)|Evalue: 9e-21	54	16234	1	8.1	136	4.87	LAIFYTICVCAAPQRQSTIRALEECQSNQLRCNSGHCYLSGYRCDGHLDCLDGSDEHKCTSQVCTKNQFSCGIQCAPISWRCDGDIDCRDGSDENSCDRVTCDNTFHFSCKNSSQCVPIKWRCDGYADCTDGTDEH	0.21	0.42
	TS15, 14-16	EZ762852	contig25676:1:412:3|similar to Very low-density lipoprotein receptor (P98155)|Evalue: 9e-21	66	16234	1	8.1	136	4.87	LAIFYTICVCAAPQRQSTIRALEECQSNQLRCNSGHCYLSGYRCDGHLDCLDGSDEHKCTSQVCTKNQFSCGIQCAPISWRCDGDIDCRDGSDENSCDRVTCDNTFHFSCKNSSQCVPIKWRCDGYADCTDGTDEH	0.21	0.63
	AS6, 5-7, 9, 11	EZ762749	contig25250:813:1145:3|similar to Low-density lipoprotein receptor-related protein 2 (A2ARV4)|Evalue: 2e-10	157	12287	4 (3)	33.6	110	8.11	MGKTKSSCVNTPYPFSMTYNDGMLYWTDWSLNKIQSASKYGGASKTHELPVGSSGKVYGIAAVPDYCPRVTNACANGNGGCQYICLPLVNGRHKCTCPDGITADLCRETE	1.09	2.56
	EES5, 6	EZ762749	contig25250:813:1145:3|similar to Low-density lipoprotein receptor-related protein 2 (A2ARV4)|Evalue: 2e-10	28	12287	1	10	110	8.11	MGKTKSSCVNTPYPFSMTYNDGMLYWTDWSLNKIQSASKYGGASKTHELPVGSSGKVYGIAAVPDYCPRVTNACANGNGGCQYICLPLVNGRHKCTCPDGITADLCRETE	0.28	0.56
	TS6, 5-8, 10, 11	EZ762749	contig25250:813:1145:3|similar to Low-density lipoprotein receptor-related protein 2 (A2ARV4)|Evalue: 2e-10	87	12287	3 (2)	21.8	110	8.11	MGKTKSSCVNTPYPFSMTYNDGMLYWTDWSLNKIQSASKYGGASKTHELPVGSSGKVYGIAAVPDYCPRVTNACANGNGGCQYICLPLVNGRHKCTCPDGITADLCRETE	0.63	2.38
perilipin family.
lipid transport	TS14	EZ761216	contig18066:109:664:1|similar to Lipid storage droplets surface-binding protein 2 (Q9VXY7)|Evalue: 2e-08	265	20727	8 (5)	35.7	185	7.88	MIERKLEPTFLDRFFSLPIVSATADSINDVYERTKHRNIMLQFAIESSERTLAFSVKQALFIAERTGITARLQPPLDIINASACAVLDKVEAKLPIITKSPEEIKSVLGENRVIQGLQKVIGIPLSTVDTYNKYVHNGSEKVRSAGVRSSEKILRVIKPYEHMVHDTMANGLDTADHLLEKLLPS	1.46	1.46
lipid storage, long-chain fatty acid transport	AS13	EZ762224	contig23310:1:1017:1|similar to Perilipin-2 (Q9TUM6)|Evalue: 8e-15	136	37696	3	11.8	338	5.61	VEKPVMSSLTYATGIASSPVINGPLHFVDTSACVLLDKVEEKVPIVTYTPEELKKLYEDNVKPRIDQLNEMKNSTVKKYNDCKSYGSAKLSEAVHIGTSTASAVMHIVGSPIQSAAHSLEWGLNTADTLVDKYLPGPQLESEPFVGEVAFEGRNLDHALCLSTKLRSRLFTHIAANIHLAQLLGQSFRVVESLKDSNAAHSLHTVWEDLSKMGPHIEFNGDITVASIEERTLELVRKLTGQLREALDHTSLHVTHYLPETMQNRVNHLSDTARDVYHQVSEATHINDLSHSLVVQVNSYVDAFQSTMNSALDVLSESYLLRWLVPEYEMKQGMVNTGM	0.29	0.29
	EES12	EZ762224	contig23310:1:1017:1|similar to Perilipin-2 (Q9TUM6)|Evalue: 8e-15	409	37696	12 (9)	32	338	5.61	VEKPVMSSLTYATGIASSPVINGPLHFVDTSACVLLDKVEEKVPIVTYTPEELKKLYEDNVKPRIDQLNEMKNSTVKKYNDCKSYGSAKLSEAVHIGTSTASAVMHIVGSPIQSAAHSLEWGLNTADTLVDKYLPGPQLESEPFVGEVAFEGRNLDHALCLSTKLRSRLFTHIAANIHLAQLLGQSFRVVESLKDSNAAHSLHTVWEDLSKMGPHIEFNGDITVASIEERTLELVRKLTGQLREALDHTSLHVTHYLPETMQNRVNHLSDTARDVYHQVSEATHINDLSHSLVVQVNSYVDAFQSTMNSALDVLSESYLLRWLVPEYEMKQGMVNTGM	1.52	1.52
	TS13	EZ762224	contig23310:1:1017:1|similar to Perilipin-2 (Q9TUM6)|Evalue: 8e-15	121	37696	3 (2)	9.5	338	5.61	VEKPVMSSLTYATGIASSPVINGPLHFVDTSACVLLDKVEEKVPIVTYTPEELKKLYEDNVKPRIDQLNEMKNSTVKKYNDCKSYGSAKLSEAVHIGTSTASAVMHIVGSPIQSAAHSLEWGLNTADTLVDKYLPGPQLESEPFVGEVAFEGRNLDHALCLSTKLRSRLFTHIAANIHLAQLLGQSFRVVESLKDSNAAHSLHTVWEDLSKMGPHIEFNGDITVASIEERTLELVRKLTGQLREALDHTSLHVTHYLPETMQNRVNHLSDTARDVYHQVSEATHINDLSHSLVVQVNSYVDAFQSTMNSALDVLSESYLLRWLVPEYEMKQGMVNTGM	0.29	0.29
Ion transport
X(+)/potassium ATPases subunit beta family.	AS13, 12-14	EZ762985	contig26273:258:1214:3|similar to Sodium/potassium-transporting ATPase subunit beta (P25169)|Evalue: 1e-52	369	36176	14 (7)	24.8	318	5.77	MASGPTETDLFVRGQEKVQPSKWQAFRTFLYNPKEGTVLGRTGKSWLQITIFYLIFYGVLAAFFSVLLVLFLQTLDDRAPKWKGAEGIIGSTPGMGFRPTPNDNGSTLIWLKKGGDRERADTGGYVQQLNDFLAPYDNQHASNNLTDCSEGTKPTDKQACRYDLSSLGPCNKARNYGYPNGQPCILIKLNKIYGWEPQEMTDENMKSEMNTALTSMYGNQRAAELQTSANSIVITCEGEDYVDREHIGPVRVHPSSIPAYYYPYLNQPEYPQPIAMLEFLNPKPGVLINVECRAWAGNIEYNRIDRQGAMKFELMVER	1.02	1.99
	EES12, 13	EZ762985	contig26273:258:1214:3|similar to Sodium/potassium-transporting ATPase subunit beta (P25169)|Evalue: 1e-52	118	36176	2	9.1	318	5.77	MASGPTETDLFVRGQEKVQPSKWQAFRTFLYNPKEGTVLGRTGKSWLQITIFYLIFYGVLAAFFSVLLVLFLQTLDDRAPKWKGAEGIIGSTPGMGFRPTPNDNGSTLIWLKKGGDRERADTGGYVQQLNDFLAPYDNQHASNNLTDCSEGTKPTDKQACRYDLSSLGPCNKARNYGYPNGQPCILIKLNKIYGWEPQEMTDENMKSEMNTALTSMYGNQRAAELQTSANSIVITCEGEDYVDREHIGPVRVHPSSIPAYYYPYLNQPEYPQPIAMLEFLNPKPGVLINVECRAWAGNIEYNRIDRQGAMKFELMVER	0.19	0.38
	TS13, 12-14	EZ762985	contig26273:258:1214:3|similar to Sodium/potassium-transporting ATPase subunit beta (P25169)|Evalue: 1e-52	362	36176	16 (7)	24.8	318	5.77	MASGPTETDLFVRGQEKVQPSKWQAFRTFLYNPKEGTVLGRTGKSWLQITIFYLIFYGVLAAFFSVLLVLFLQTLDDRAPKWKGAEGIIGSTPGMGFRPTPNDNGSTLIWLKKGGDRERADTGGYVQQLNDFLAPYDNQHASNNLTDCSEGTKPTDKQACRYDLSSLGPCNKARNYGYPNGQPCILIKLNKIYGWEPQEMTDENMKSEMNTALTSMYGNQRAAELQTSANSIVITCEGEDYVDREHIGPVRVHPSSIPAYYYPYLNQPEYPQPIAMLEFLNPKPGVLINVECRAWAGNIEYNRIDRQGAMKFELMVER	1.02	2.01
	AS7, 3-10	EZ762971	contig26215:1:1901:3|similar to Sodium/potassium-transporting ATPase subunit alpha-1 (P04074)|Evalue: 0.0	889	72357	22 (14)	24.7	632	6.09	CGLITNRRGRHHRNPNRSTFRPYITELERTLESRCTVQSATFKPNQENIPILKREVNGDASEAALLKFVESSIGKIREYRDRNRKVCXDPFNSTNKYQVSIHETEEPHDSRYLVVVKGAPERIWDMCSTIMINGVEEPLTEEWARRFNDAYRELGGLGERALGFCDMMLPEDQFPPGYPFDPEEHNWPKAGFRFVGLLSMIDPPRAAVPDAVSKCRSAGIKVIMVTGDHPITAKAIARSVGIISDGVETVEEIAERLGVPVKNVNPRDAKACVIHGQDLRSMDDQQLDDLLRHHTEIVFARTSPQQKLIIVEGCQRQGAIVAVTGDGVNDSPALKKADIGVAMGIAGSDVSKQAADMILLDDNFASIVVGIEEGRLIFDNLKKSIAYTLTSNIPEISPF…	1.22	4.94
	EES7, 3, 4, 5	EZ762971	contig26215:1:1901:3|similar to Sodium/potassium-transporting ATPase subunit alpha-1 (P04074)|Evalue: 0.0	419	72357	6	14.9	632	6.09	CGLITNRRGRHHRNPNRSTFRPYITELERTLESRCTVQSATFKPNQENIPILKREVNGDASEAALLKFVESSIGKIREYRDRNRKVCXDPFNSTNKYQVSIHETEEPHDSRYLVVVKGAPERIWDMCSTIMINGVEEPLTEEWARRFNDAYRELGGLGERALGFCDMMLPEDQFPPGYPFDPEEHNWPKAGFRFVGLLSMIDPPRAAVPDAVSKCRSAGIKVIMVTGDHPITAKAIARSVGIISDGVETVEEIAERLGVPVKNVNPRDAKACVIHGQDLRSMDDQQLDDLLRHHTEIVFARTSPQQKLIIVEGCQRQGAIVAVTGDGVNDSPALKKADIGVAMGIAGSDVSKQAADMILLDDNFASIVVGIEEGRLIFDNLKKSIAYTLTSNIPEISPF…	0.3	0.58
	TS8, 4-8	EZ762971	contig26215:1:1901:3|similar to Sodium/potassium-transporting ATPase subunit alpha-1 (P04074)|Evalue: 0.0	926	72357	24 (15)	31.3	632	6.09	CGLITNRRGRHHRNPNRSTFRPYITELERTLESRCTVQSATFKPNQENIPILKREVNGDASEAALLKFVESSIGKIREYRDRNRKVCXDPFNSTNKYQVSIHETEEPHDSRYLVVVKGAPERIWDMCSTIMINGVEEPLTEEWARRFNDAYRELGGLGERALGFCDMMLPEDQFPPGYPFDPEEHNWPKAGFRFVGLLSMIDPPRAAVPDAVSKCRSAGIKVIMVTGDHPITAKAIARSVGIISDGVETVEEIAERLGVPVKNVNPRDAKACVIHGQDLRSMDDQQLDDLLRHHTEIVFARTSPQQKLIIVEGCQRQGAIVAVTGDGVNDSPALKKADIGVAMGIAGSDVSKQAADMILLDDNFASIVVGIEEGRLIFDNLKKSIAYTLTSNIPEISPF…	1.03	4.03
	AS7, 4-8	EZ760836	contig13779:85:487:1|similar to Sodium/potassium-transporting ATPase subunit alpha (Q6RWA9)|Evalue: 2e-33	163	15096	3	38.1	134	4.95	MTVDERSGSYIAATSPAVTNNDKQHQLAATKTKKSETENKAELDDLKQELEMDEHTIPIEDLYTRLTVNPSVGLTTAEAQRRLERDGPNALSPPKTTPEWIKFMRQLFGGFAMLLWIGALLCFIAYGITVYQDE	0.84	3.18
	EES3, 7	EZ760836	contig13779:85:487:1|similar to Sodium/potassium-transporting ATPase subunit alpha (Q6RWA9)|Evalue: 2e-33	66	15096	1	11.9	134	4.95	MTVDERSGSYIAATSPAVTNNDKQHQLAATKTKKSETENKAELDDLKQELEMDEHTIPIEDLYTRLTVNPSVGLTTAEAQRRLERDGPNALSPPKTTPEWIKFMRQLFGGFAMLLWIGALLCFIAYGITVYQDE	0.23	0.46
	TS7, 4-8	EZ760836	contig13779:85:487:1|similar to Sodium/potassium-transporting ATPase subunit alpha (Q6RWA9)|Evalue: 2e-33	117	15096	2	19.4	134	4.95	MTVDERSGSYIAATSPAVTNNDKQHQLAATKTKKSETENKAELDDLKQELEMDEHTIPIEDLYTRLTVNPSVGLTTAEAQRRLERDGPNALSPPKTTPEWIKFMRQLFGGFAMLLWIGALLCFIAYGITVYQDE	0.5	2.57
	AS5, 7, 8	EZ760316	contig08413:1:307:1|similar to Sodium/potassium-transporting ATPase subunit alpha (Q6RWA9)|Evalue: 4e-44	127	11354	2	25.5	102	8.97	REISHFIHIITGVAVFLGVTFFIIAFILKYFWLDAVIFLIGIIVANVPEGLLATVTVCLTLTAKRMAKKNCLVKNLEAVETLGSTSTICSDKTGTLTQNRMT	0.7	1
	TS8, 4, 5, 7	EZ760316	contig08413:1:307:1|similar to Sodium/potassium-transporting ATPase subunit alpha (Q6RWA9)|Evalue: 4e-44	140	11354	2	25.5	102	8.97	REISHFIHIITGVAVFLGVTFFIIAFILKYFWLDAVIFLIGIIVANVPEGLLATVTVCLTLTAKRMAKKNCLVKNLEAVETLGSTSTICSDKTGTLTQNRMT	0.7	2.1
cation transport ATPase (P-type) family.	AS5, 3-11, 13-17	EZ762032	contig22430:1:860:3|similar to Calcium-transporting ATPase sarcoplasmic/endoplasmic reticulum type (Q7PPA5)|Evalue: 1e-131	469	31615	6 (5)	22.1	285	4.87	DAPALKKAEIGIAMGSGTAVAKSASDMVLADDNFSSIVAAVEEGRAIYNNMKQFIRYLISSNIGEVVSIFLTAALGMPEALIPVQLLWVNLVTDGLPATALGFNPPDLDIMDKPPRSSKESLISGWLFFRYMAIGGYVGAATVGAAAWWFMAYPNGPHLTYYQLTHHLTCANEPENFRGVDCDIFEDPHPMTMALSVLVTIEMLNAMNSLSENQSLVKMPPWTNIWLCAAICLSMTLHFVILYIDVLSNVFQITPLNWTEWIAVLKISLPVVLLDETLKYMSRKL	0.65	5.17
	EES7, 2, 3	EZ762032	contig22430:1:860:3|similar to Calcium-transporting ATPase sarcoplasmic/endoplasmic reticulum type (Q7PPA5)|Evalue: 1e-131	192	31615	4 (2)	12.6	285	4.87	DAPALKKAEIGIAMGSGTAVAKSASDMVLADDNFSSIVAAVEEGRAIYNNMKQFIRYLISSNIGEVVSIFLTAALGMPEALIPVQLLWVNLVTDGLPATALGFNPPDLDIMDKPPRSSKESLISGWLFFRYMAIGGYVGAATVGAAAWWFMAYPNGPHLTYYQLTHHLTCANEPENFRGVDCDIFEDPHPMTMALSVLVTIEMLNAMNSLSENQSLVKMPPWTNIWLCAAICLSMTLHFVILYIDVLSNVFQITPLNWTEWIAVLKISLPVVLLDETLKYMSRKL	0.35	0.68
	TS4, 1-8	EZ762032	contig22430:1:860:3|similar to Calcium-transporting ATPase sarcoplasmic/endoplasmic reticulum type (Q7PPA5)|Evalue: 1e-131	472	31615	8 (5)	22.1	285	4.87	DAPALKKAEIGIAMGSGTAVAKSASDMVLADDNFSSIVAAVEEGRAIYNNMKQFIRYLISSNIGEVVSIFLTAALGMPEALIPVQLLWVNLVTDGLPATALGFNPPDLDIMDKPPRSSKESLISGWLFFRYMAIGGYVGAATVGAAAWWFMAYPNGPHLTYYQLTHHLTCANEPENFRGVDCDIFEDPHPMTMALSVLVTIEMLNAMNSLSENQSLVKMPPWTNIWLCAAICLSMTLHFVILYIDVLSNVFQITPLNWTEWIAVLKISLPVVLLDETLKYMSRKL	0.82	3.75
	AS4, 5, 7-11	EZ761701	contig20293:1:217:2|similar to Calcium-transporting ATPase sarcoplasmic/endoplasmic reticulum type (Q7PPA5)|Evalue: 4e-12	212	8009	3 (2)	43.7	71	5.13	TNQMSVSRMFYLDQVDGQGTQPRQFEISGSTYEPIGELKNEKGQRVKASDYDNLLNWPRSAQSAMTLASIQ	1.08	5.64
	EES7, 3, 4	EZ761701	contig20293:1:217:2|similar to Calcium-transporting ATPase sarcoplasmic/endoplasmic reticulum type (Q7PPA5)|Evalue: 4e-12	158	8009	2	43.7	71	5.13	TNQMSVSRMFYLDQVDGQGTQPRQFEISGSTYEPIGELKNEKGQRVKASDYDNLLNWPRSAQSAMTLASIQ	1.08	1.96
	TS4, 4-10	EZ761701	contig20293:1:217:2|similar to Calcium-transporting ATPase sarcoplasmic/endoplasmic reticulum type (Q7PPA5)|Evalue: 4e-12	195	8009	5 (2)	43.7	71	5.13	TNQMSVSRMFYLDQVDGQGTQPRQFEISGSTYEPIGELKNEKGQRVKASDYDNLLNWPRSAQSAMTLASIQ	1.08	7.19
	AS7, 2-10, 12	EZ759476	contig03085:1:685:1|similar to Calcium-transporting ATPase sarcoplasmic/endoplasmic reticulum type (Q7PPA5)|Evalue: 9e-98	562	25529	17 (13)	55.3	228	8.79	HKEFTLEFSRDRKSMSAYCTPVGKASKGMSSGPKIFCKGAPEGVLERCTHVRVGTQKVAMTPQLKVKILELVKQYGTGRDTLRCLALATIDEPMNPKDMDVADSTKFFKYEKDMTFVGCVGMLDPPRKEVFDAIQLCKRAGIRVIVITGDNKLTAEAICRRIGVFGENENTEGLSYTGREFDDLSLAEQRSAVLRARLFARVEPAHKSKIVEFLQAAGEVTAMTGDGV	3.94	10.58
	EES7, 3-5	EZ759476	contig03085:1:685:1|similar to Calcium-transporting ATPase sarcoplasmic/endoplasmic reticulum type (Q7PPA5)|Evalue: 9e-98	242	25529	4	24.1	228	8.79	HKEFTLEFSRDRKSMSAYCTPVGKASKGMSSGPKIFCKGAPEGVLERCTHVRVGTQKVAMTPQLKVKILELVKQYGTGRDTLRCLALATIDEPMNPKDMDVADSTKFFKYEKDMTFVGCVGMLDPPRKEVFDAIQLCKRAGIRVIVITGDNKLTAEAICRRIGVFGENENTEGLSYTGREFDDLSLAEQRSAVLRARLFARVEPAHKSKIVEFLQAAGEVTAMTGDGV	0.64	1.05
	TS4, 3-9, 11	EZ759476	contig03085:1:685:1|similar to Calcium-transporting ATPase sarcoplasmic/endoplasmic reticulum type (Q7PPA5)|Evalue: 9e-98	539	25529	15 (10)	49.6	228	8.79	HKEFTLEFSRDRKSMSAYCTPVGKASKGMSSGPKIFCKGAPEGVLERCTHVRVGTQKVAMTPQLKVKILELVKQYGTGRDTLRCLALATIDEPMNPKDMDVADSTKFFKYEKDMTFVGCVGMLDPPRKEVFDAIQLCKRAGIRVIVITGDNKLTAEAICRRIGVFGENENTEGLSYTGREFDDLSLAEQRSAVLRARLFARVEPAHKSKIVEFLQAAGEVTAMTGDGV	2.42	8.95
	AS7, 2-12, 14-19	EZ759411	contig02754:347:1399:2|similar to Calcium-transporting ATPase sarcoplasmic/endoplasmic reticulum type (Q7PPA5)|Evalue: 1e-150	739	38779	20 (11)	38.6	350	5.1	MDTAYQKPVDDVVRYFDVDPENGLSDALVKEYQAKYGLNELPAEEAKPLWELILEQFDDLLVKILLLAAIISFVLALFEEHDDQITAFVEPFVILLILIANAVVGVWQERNAESAIEALKEYEPEMGKVVRQDKQGVQRIRANQIVPGDLVEISVGDKVPADIRLVKIYSTTLRIDQSILTGESVSVIKHTDPVPDERAVNQDKKNILFSGTNVAAGKARGIVIGTGLNTEIGKIRTSMAETEAEATPLQQKLDEFGEQLSKVISIICVAVWAINIGHFNDPVHGGSWLKGAIYYFKIAVALAVAAIPEGLPAVITTCLALGTRRMAKKECYRTIATFSRDTRLHISHLL	1.9	7.44
	EES7, 2-7	EZ759411	contig02754:347:1399:2|similar to Calcium-transporting ATPase sarcoplasmic/endoplasmic reticulum type (Q7PPA5)|Evalue: 1e-150	316	38779	7 (5)	21.1	350	5.1	MDTAYQKPVDDVVRYFDVDPENGLSDALVKEYQAKYGLNELPAEEAKPLWELILEQFDDLLVKILLLAAIISFVLALFEEHDDQITAFVEPFVILLILIANAVVGVWQERNAESAIEALKEYEPEMGKVVRQDKQGVQRIRANQIVPGDLVEISVGDKVPADIRLVKIYSTTLRIDQSILTGESVSVIKHTDPVPDERAVNQDKKNILFSGTNVAAGKARGIVIGTGLNTEIGKIRTSMAETEAEATPLQQKLDEFGEQLSKVISIICVAVWAINIGHFNDPVHGGSWLKGAIYYFKIAVALAVAAIPEGLPAVITTCLALGTRRMAKKECYRTIATFSRDTRLHISHLL	0.64	1.46
	TS4, 1-13, 16, 17	EZ759411	contig02754:347:1399:2|similar to Calcium-transporting ATPase sarcoplasmic/endoplasmic reticulum type (Q7PPA5)|Evalue: 1e-150	670	38779	22 (11)	38.3	350	5.1	MDTAYQKPVDDVVRYFDVDPENGLSDALVKEYQAKYGLNELPAEEAKPLWELILEQFDDLLVKILLLAAIISFVLALFEEHDDQITAFVEPFVILLILIANAVVGVWQERNAESAIEALKEYEPEMGKVVRQDKQGVQRIRANQIVPGDLVEISVGDKVPADIRLVKIYSTTLRIDQSILTGESVSVIKHTDPVPDERAVNQDKKNILFSGTNVAAGKARGIVIGTGLNTEIGKIRTSMAETEAEATPLQQKLDEFGEQLSKVISIICVAVWAINIGHFNDPVHGGSWLKGAIYYFKIAVALAVAAIPEGLPAVITTCLALGTRRMAKKECYRTIATFSRDTRLHISHLL	1.67	7.71
	AS6, 4-7	EZ760667	contig11608:1:909:2|similar to Plasma membrane calcium-transporting ATPase 4 (P23634)|Evalue: 1e-102	148	33870	3	10.9	302	7.19	HRDDVAKEASDIILTDDNFTSIVKACMWGRNVYDSIAKFLQFQLTVNVVAVIVAFSGACIVGDTPLKAVQMLGXNLIMDTFASLALATEPPTNDLLNRKPYGRTKALVSRTMMKNILGQAIYQLVVIFVLLFRAPQIFDIDNGATSEYGSVPTQHFTLIFNTFVFMTLFNEINARKIHGERNVFVGIHRNPIFIAIWIGTAIAQVIIVEFGSYAFSSSGLDLELWMYSVLFGVGTLLWQQLVTSVPTHRIPKFFRWGQQVPTDEDVNIALGEDPNPNNPDGSGRRGTRHGQILWIRSLTRLQ	0.32	0.84
	EES6, 3-6	EZ760667	contig11608:1:909:2|similar to Plasma membrane calcium-transporting ATPase 4 (P23634)|Evalue: 1e-102	129	33870	3	10.9	302	7.19	HRDDVAKEASDIILTDDNFTSIVKACMWGRNVYDSIAKFLQFQLTVNVVAVIVAFSGACIVGDTPLKAVQMLGXNLIMDTFASLALATEPPTNDLLNRKPYGRTKALVSRTMMKNILGQAIYQLVVIFVLLFRAPQIFDIDNGATSEYGSVPTQHFTLIFNTFVFMTLFNEINARKIHGERNVFVGIHRNPIFIAIWIGTAIAQVIIVEFGSYAFSSSGLDLELWMYSVLFGVGTLLWQQLVTSVPTHRIPKFFRWGQQVPTDEDVNIALGEDPNPNNPDGSGRRGTRHGQILWIRSLTRLQ	0.32	0.62
	TS4, 4-6	EZ760667	contig11608:1:909:2|similar to Plasma membrane calcium-transporting ATPase 4 (P23634)|Evalue: 1e-102	122	33870	5 (3)	10.9	302	7.19	HRDDVAKEASDIILTDDNFTSIVKACMWGRNVYDSIAKFLQFQLTVNVVAVIVAFSGACIVGDTPLKAVQMLGXNLIMDTFASLALATEPPTNDLLNRKPYGRTKALVSRTMMKNILGQAIYQLVVIFVLLFRAPQIFDIDNGATSEYGSVPTQHFTLIFNTFVFMTLFNEINARKIHGERNVFVGIHRNPIFIAIWIGTAIAQVIIVEFGSYAFSSSGLDLELWMYSVLFGVGTLLWQQLVTSVPTHRIPKFFRWGQQVPTDEDVNIALGEDPNPNNPDGSGRRGTRHGQILWIRSLTRLQ	0.32	0.63
	AS5, 4-7	EZ760038	contig06386:752:1527:2|similar to Plasma membrane calcium-transporting ATPase 3 (Q16720)|Evalue: 1e-67	298	28629	4	26.4	258	4.86	MSKGDGGTQDDYPISPHELSNMMRLRGEEARVHIEETYGGAVELCRKLRVNPNEGLLDDADIQKRVAFYGANTIPPKPPKSFFRLVWEALQDMTLIILQVAAVISLVLSFLQFGGDDDEAHDDHNVEWIEAVAILVSVVVVVFVTAFNDYTKERQFRGLQSKIDTEHRIAALRGGHVQQIAVSDLVVGDICQIKYGDLLPADGIVLQSNDLKIDESSLTGETDHIKKGVDRDPTLLSGXARDGRQWQMLVTAVGLNSQ	0.55	1.44
	EES5, 4	EZ760038	contig06386:752:1527:2|similar to Plasma membrane calcium-transporting ATPase 3 (Q16720)|Evalue: 1e-67	68	28629	1	7	258	4.86	MSKGDGGTQDDYPISPHELSNMMRLRGEEARVHIEETYGGAVELCRKLRVNPNEGLLDDADIQKRVAFYGANTIPPKPPKSFFRLVWEALQDMTLIILQVAAVISLVLSFLQFGGDDDEAHDDHNVEWIEAVAILVSVVVVVFVTAFNDYTKERQFRGLQSKIDTEHRIAALRGGHVQQIAVSDLVVGDICQIKYGDLLPADGIVLQSNDLKIDESSLTGETDHIKKGVDRDPTLLSGXARDGRQWQMLVTAVGLNSQ	0.12	0.24
	TS5, 4-6	EZ760038	contig06386:752:1527:2|similar to Plasma membrane calcium-transporting ATPase 3 (Q16720)|Evalue: 1e-67	228	28629	5 (3)	20.9	258	4.86	MSKGDGGTQDDYPISPHELSNMMRLRGEEARVHIEETYGGAVELCRKLRVNPNEGLLDDADIQKRVAFYGANTIPPKPPKSFFRLVWEALQDMTLIILQVAAVISLVLSFLQFGGDDDEAHDDHNVEWIEAVAILVSVVVVVFVTAFNDYTKERQFRGLQSKIDTEHRIAALRGGHVQQIAVSDLVVGDICQIKYGDLLPADGIVLQSNDLKIDESSLTGETDHIKKGVDRDPTLLSGXARDGRQWQMLVTAVGLNSQ	0.39	1.03
iron transport
sideroflexin family	AS15	EZ760314	contig08407:69:1061:3|similar to Sideroflexin-3 (Q9JHY2)|Evalue: 3e-106	290	36574	10 (6)	23	330	9.47	MDYLSEKPVQPKSINIDVARWDQSTYSGRAKHFFTITNPLNLLKSDKDLQEARAIIENYRKGRIQPSVNAEKLWEAKHVYDSAFHPDTGEKMFLLGRMSAQVPSNMLITGMMLTFYKSVPAVVFWQWVNQSFNAIVNYTNRSGDKPISNQTLGTAYALATTGATATALGLNALTXKKMPPLVGRFVPFAAVAAANCINIPIIRQKELVDGIPVLDKNGNRVGQSTEAAKWAIVKVALSRIGMAVPGMVLPPILVNYLEQKTTFFKRYPWAPAPLQIALCGACLVFATPLCCALFPQRSSIAVKDLEPEVKRQALSAGLSAEDHVSYNKGL	0.84	0.84
	EES14	EZ760314	contig08407:69:1061:3|similar to Sideroflexin-3 (Q9JHY2)|Evalue: 3e-106	201	36574	4	17.3	330	9.47	MDYLSEKPVQPKSINIDVARWDQSTYSGRAKHFFTITNPLNLLKSDKDLQEARAIIENYRKGRIQPSVNAEKLWEAKHVYDSAFHPDTGEKMFLLGRMSAQVPSNMLITGMMLTFYKSVPAVVFWQWVNQSFNAIVNYTNRSGDKPISNQTLGTAYALATTGATATALGLNALTXKKMPPLVGRFVPFAAVAAANCINIPIIRQKELVDGIPVLDKNGNRVGQSTEAAKWAIVKVALSRIGMAVPGMVLPPILVNYLEQKTTFFKRYPWAPAPLQIALCGACLVFATPLCCALFPQRSSIAVKDLEPEVKRQALSAGLSAEDHVSYNKGL	0.42	0.42
	TS15	EZ760314	contig08407:69:1061:3|similar to Sideroflexin-3 (Q9JHY2)|Evalue: 3e-106	294	36574	11 (9)	30.3	330	9.47	MDYLSEKPVQPKSINIDVARWDQSTYSGRAKHFFTITNPLNLLKSDKDLQEARAIIENYRKGRIQPSVNAEKLWEAKHVYDSAFHPDTGEKMFLLGRMSAQVPSNMLITGMMLTFYKSVPAVVFWQWVNQSFNAIVNYTNRSGDKPISNQTLGTAYALATTGATATALGLNALTXKKMPPLVGRFVPFAAVAAANCINIPIIRQKELVDGIPVLDKNGNRVGQSTEAAKWAIVKVALSRIGMAVPGMVLPPILVNYLEQKTTFFKRYPWAPAPLQIALCGACLVFATPLCCALFPQRSSIAVKDLEPEVKRQALSAGLSAEDHVSYNKGL	1.18	1.18
Transferrin family	AS7, 7-9	EZ759427	contig02827:1:1595:3|similar to Melanotransferrin (P08582)|Evalue: 5e-36	584	60839	13 (12)	31.7	530	5.88	SVLYQQGQLKIAQCGESYMDATMKYFGEMCAPYDTHNFTEEENNKYRRMCSLCNGQHCPPLDQLGKDFPINCLVQNSGVDAPSFPLQRFGCHFKEDLXPDPTQYHVICPEAQESTNGNFVPLVDNNNKPLPEWLDCHYGRIPSHAYIARPTMPRFPDVSDRIQELFMFKKPDSNSGQGFNQLQSNSQYNNWFENFFSGKYDQQSVVRIHTFYRSEESDIRKYLDGYNAYLEDPAACTKDRAARWCTTSNIDFQKCELMAKAFQMYRIRPELMCEKPVKHSYTCMDRIQRNQSDITVIDVADLLTATNYYDAVALAQERYYVSDDSGYSQPSGPIDEIYSVAIVRDSGIKTLSALQGKKACFTGIHEAAGFVLPMYSLKSQGLTSNPNNYCDLVESANQF…	0.98	1.2
	TS7, 7-9	EZ759427	contig02827:1:1595:3|similar to Melanotransferrin (P08582)|Evalue: 5e-36	646	60839	19 (13)	27.4	530	5.88	SVLYQQGQLKIAQCGESYMDATMKYFGEMCAPYDTHNFTEEENNKYRRMCSLCNGQHCPPLDQLGKDFPINCLVQNSGVDAPSFPLQRFGCHFKEDLXPDPTQYHVICPEAQESTNGNFVPLVDNNNKPLPEWLDCHYGRIPSHAYIARPTMPRFPDVSDRIQELFMFKKPDSNSGQGFNQLQSNSQYNNWFENFFSGKYDQQSVVRIHTFYRSEESDIRKYLDGYNAYLEDPAACTKDRAARWCTTSNIDFQKCELMAKAFQMYRIRPELMCEKPVKHSYTCMDRIQRNQSDITVIDVADLLTATNYYDAVALAQERYYVSDDSGYSQPSGPIDEIYSVAIVRDSGIKTLSALQGKKACFTGIHEAAGFVLPMYSLKSQGLTSNPNNYCDLVESANQF…	1.09	1.25
ferritin family	AS19	EZ763082	contig26835:204:534:3|similar to Ferritin, liver middle subunit (P85836)|Evalue: 3e-17	230	12854	6 (5)	38.2	110	5.52	MSASNIEAINKRINLEFAAMYTFDTMASFFDSADNPLPGCVLFFLKHSDRQHERARILMTFMNLKGGKLSLPDIKMPTVNEWDSCYDAMQDALRINEQIRQELHELYVRA	2.25	2.25
	EES17, 18	EZ763082	contig26835:204:534:3|similar to Ferritin, liver middle subunit (P85836)|Evalue: 3e-17	389	12854	9 (7)	56.4	110	5.52	MSASNIEAINKRINLEFAAMYTFDTMASFFDSADNPLPGCVLFFLKHSDRQHERARILMTFMNLKGGKLSLPDIKMPTVNEWDSCYDAMQDALRINEQIRQELHELYVRA	4.21	6.46
	TS19	EZ763082	contig26835:204:534:3|similar to Ferritin, liver middle subunit (P85836)|Evalue: 3e-17	170	12854	4	30	110	5.52	MSASNIEAINKRINLEFAAMYTFDTMASFFDSADNPLPGCVLFFLKHSDRQHERARILMTFMNLKGGKLSLPDIKMPTVNEWDSCYDAMQDALRINEQIRQELHELYVRA	1.57	1.57
	AS19, 18	EZ762769	contig25338:117:710:3|similar to Soma ferritin (P42577)|Evalue: 9e-18	240	21937	8 (5)	32.5	197	4.48	MLGIEAAALVLAYLGQIYYGTDAAIGTTADAGLQQRLRFKTTANLETALNNQINLEYSAMYAYDMMAAYFDNVQTSMPGCSQFFLLNSNEEHEHARVFITYMNLKGLLVNLKDIKVPTQTSWRSCLEAMEYALELENRVRLSLDDLNKKASGADASGTDEDVALTELLGEMIMDQTSSIKRLGDIVSQLYASVEMTV	1.03	1.56
	EES17, 16	EZ762769	contig25338:117:710:3|similar to Soma ferritin (P42577)|Evalue: 9e-18	361	21937	12 (6)	36.5	197	4.48	MLGIEAAALVLAYLGQIYYGTDAAIGTTADAGLQQRLRFKTTANLETALNNQINLEYSAMYAYDMMAAYFDNVQTSMPGCSQFFLLNSNEEHEHARVFITYMNLKGLLVNLKDIKVPTQTSWRSCLEAMEYALELENRVRLSLDDLNKKASGADASGTDEDVALTELLGEMIMDQTSSIKRLGDIVSQLYASVEMTV	1.7	2.46
	TS18, 19	EZ762769	contig25338:117:710:3|similar to Soma ferritin (P42577)|Evalue: 9e-18	290	21937	9 (6)	36.5	197	4.48	MLGIEAAALVLAYLGQIYYGTDAAIGTTADAGLQQRLRFKTTANLETALNNQINLEYSAMYAYDMMAAYFDNVQTSMPGCSQFFLLNSNEEHEHARVFITYMNLKGLLVNLKDIKVPTQTSWRSCLEAMEYALELENRVRLSLDDLNKKASGADASGTDEDVALTELLGEMIMDQTSSIKRLGDIVSQLYASVEMTV	1.34	1.49
	EES1, 18	EZ760672	contig11630:1846:2601:1|similar to Soma ferritin (P42577)|Evalue: 5e-71	406	28289	8 (6)	29.1	251	5.81	MRECLILFTATVESSELSGVSSNGQLCAFLTNRSLSKTVVITLLLFIQSAKHFPILGFHWTRXKTSIASIFSAKMSNPSGSAVVRQNYHSESEAGLNRQINLELYASYVYLSMSNYFDRDDVALPGFSKFFKKQSDEERKHAQILMNYQNKRGGRIVLADVKKPEKDEWGTGLDAMSAAVQLEKNVNQALLELNGIAEKHNDAQMSDFITSEFLKEQVESIKELADYVTNLKRVGAGLGEFMFDKELQEEA	1.18	1.92
	TS19	EZ760672	contig11630:1846:2601:1|similar to Soma ferritin (P42577)|Evalue: 5e-71	195	28289	6 (3)	19.5	251	5.81	MRECLILFTATVESSELSGVSSNGQLCAFLTNRSLSKTVVITLLLFIQSAKHFPILGFHWTRXKTSIASIFSAKMSNPSGSAVVRQNYHSESEAGLNRQINLELYASYVYLSMSNYFDRDDVALPGFSKFFKKQSDEERKHAQILMNYQNKRGGRIVLADVKKPEKDEWGTGLDAMSAAVQLEKNVNQALLELNGIAEKHNDAQMSDFITSEFLKEQVESIKELADYVTNLKRVGAGLGEFMFDKELQEEA	0.56	0.56
	EES17, 15-18	EZ760102	contig06849:1:534:1|similar to Soma ferritin (P42577)|Evalue: 2e-55	561	20170	20 (9)	58.2	177	6.47	KMNTSHIAPALARQNYHPETEATLNRQINLELYTSYVYLSMSLYFIRDDVALPGFSKFFKGRSDKELEHAHKLMAYQIKRGGSVVLGDVKKPEKDEWGTAFDAMLAALQLQKNVSQAFFDLYNVADKHNDIQMSNHIANDFMEDQVKFIKELADHATKLKRAGGGLGEFMVDHELKN	5.34	11.7
protein transport
COPE family.	AS15, 16	EZ763257	contig27897:1:262:2|similar to Coatomer subunit epsilon (Q28104)|Evalue: 8e-16	253	10041	4	52.3	86	4.95	ALIAMQRYAEAEDYLQDALAKNNSDPATLANLFVCGHNTGKSDEVSNRYLSQLRDSHSNFEFTQFLTHKENDFDRLCLQYSNEIRQ	1.45	1.8
	EES14	EZ763257	contig27897:1:262:2|similar to Coatomer subunit epsilon (Q28104)|Evalue: 8e-16	134	10041	3 (2)	39.5	86	4.95	ALIAMQRYAEAEDYLQDALAKNNSDPATLANLFVCGHNTGKSDEVSNRYLSQLRDSHSNFEFTQFLTHKENDFDRLCLQYSNEIRQ	0.82	0.82
	TS15	EZ763257	contig27897:1:262:2|similar to Coatomer subunit epsilon (Q28104)|Evalue: 8e-16	182	10041	4 (3)	45.3	86	4.95	ALIAMQRYAEAEDYLQDALAKNNSDPATLANLFVCGHNTGKSDEVSNRYLSQLRDSHSNFEFTQFLTHKENDFDRLCLQYSNEIRQ	1.45	1.45
COPG family.	AS8	EZ763071	contig26726:1:674:3|similar to Coatomer subunit gamma-2 (Q66JI9)|Evalue: 7e-38	218	25133	5 (4)	24.2	223	4.54	TYIRTTSRVSVRLHQHFERSTFAKSLHTYAEPEAAFEIIGTISCPKLECNIPGTTYTCVRLPEGEVGATGAFACTMKFLVKDCDPATGEPDDEGDGYEDEYSLEECEVLLADHMQKVIVANFAAAWDDFGDDNESQQTYQLQQKSLQEAVDNVVQFFGMQALDKTDRASQDKNTHTLLMSGVFRGNFNVLVRCKLVLGANGVAMQLMVRSDDPDINEAIIQAM	0.87	0.87
	EES7	EZ763071	contig26726:1:674:3|similar to Coatomer subunit gamma-2 (Q66JI9)|Evalue: 7e-38	293	25133	6 (5)	32.7	223	4.54	TYIRTTSRVSVRLHQHFERSTFAKSLHTYAEPEAAFEIIGTISCPKLECNIPGTTYTCVRLPEGEVGATGAFACTMKFLVKDCDPATGEPDDEGDGYEDEYSLEECEVLLADHMQKVIVANFAAAWDDFGDDNESQQTYQLQQKSLQEAVDNVVQFFGMQALDKTDRASQDKNTHTLLMSGVFRGNFNVLVRCKLVLGANGVAMQLMVRSDDPDINEAIIQAM	1.12	1.12
	TS8	EZ763071	contig26726:1:674:3|similar to Coatomer subunit gamma-2 (Q66JI9)|Evalue: 7e-38	156	25133	3	18.8	223	4.54	TYIRTTSRVSVRLHQHFERSTFAKSLHTYAEPEAAFEIIGTISCPKLECNIPGTTYTCVRLPEGEVGATGAFACTMKFLVKDCDPATGEPDDEGDGYEDEYSLEECEVLLADHMQKVIVANFAAAWDDFGDDNESQQTYQLQQKSLQEAVDNVVQFFGMQALDKTDRASQDKNTHTLLMSGVFRGNFNVLVRCKLVLGANGVAMQLMVRSDDPDINEAIIQAM	0.46	0.46
	EES18	EZ761844	contig21179:1:442:3|similar to Coatomer subunit zeta-1 (P61924)|Evalue: 1e-49	249	16704	5 (3)	27.2	147	4.7	MESYIPDGTLYSVRALLILDSDGARLVAKYYEDIFPTLKEQKAFEKNLFAKTSKANGEIIMIDGLTCVYKSNVDLYFYIVGSSRENEIVLTQVLNCLYESVQKVLGKSFEKRAFLDNLDSIFLITDEIVDGGIILETDPQNVLHRAS	0.74	0.74
	AS8	EZ761803	contig20906:1:416:1|similar to Coatomer subunit gamma (P53620)|Evalue: 4e-24	93	15893	2	20.3	138	6.14	ALVEYGSDYSRXKNADVKDTGLGHLCEFIEDCDHVNLAYVYWLYWPRRAETRNPARYIRFIYKPGVILETAAVRVAAVTTLAKFGAFSEQLRPSILVLLSRSMTDQEDEVRDRATYYYSILLTGQNSLMLPYVLGALQ	0.47	0.68
	EES7	EZ761803	contig20906:1:416:1|similar to Coatomer subunit gamma (P53620)|Evalue: 4e-24	132	15893	4 (3)	26.8	138	6.14	ALVEYGSDYSRXKNADVKDTGLGHLCEFIEDCDHVNLAYVYWLYWPRRAETRNPARYIRFIYKPGVILETAAVRVAAVTTLAKFGAFSEQLRPSILVLLSRSMTDQEDEVRDRATYYYSILLTGQNSLMLPYVLGALQ	0.79	0.79
	AS8, 5	EZ761750	contig20586:1:478:1|similar to Coatomer subunit beta~ (O55029)|Evalue: 4e-39	40	17885	1	5	159	8.39	KAEEIAEKAESLQKWKQLGALALRQSNYKVAQKCMFAAEDYSGLLLMASCSGDKALIKQLAVAAEQKKQFNIAFTAYWTMSDLQSCLDILIRTDRLPEAAFFAYTYLSGQVSNVVGIWKEKLAKSNPKAAQALADPRQYPNLFPNFQESSDDISSQNKT	0.19	0.38
	EES7	EZ761750	contig20586:1:478:1|similar to Coatomer subunit beta~ (O55029)|Evalue: 4e-39	56	17885	2	10.7	159	8.39	KAEEIAEKAESLQKWKQLGALALRQSNYKVAQKCMFAAEDYSGLLLMASCSGDKALIKQLAVAAEQKKQFNIAFTAYWTMSDLQSCLDILIRTDRLPEAAFFAYTYLSGQVSNVVGIWKEKLAKSNPKAAQALADPRQYPNLFPNFQESSDDISSQNKT	0.41	0.41
	AS6, 4-9	EZ761419	contig18962:1:2389:2|similar to Coatomer subunit alpha (P53621)|Evalue: 0.0	673	90799	12	20.1	795	6.15	CFRSFESIVIKNLKNEXGGKKIQLSNCDEIYYAGTGVLLYRDGDYVIMYDLQQKAALASARVPKVKYVIWSNDMAFVALLSKHSVTLCNRNLETLSTIQESVNVKSGAWDENNIFIYTTSNHIKYSIANGDFGIIRTLDFTIYITRIKGSNVYCLDRECNPRVLSIDPTEYRFKLAVCQRRYDEVLHMVKHAKLIGQSIIAYLQLKGYPEIALHFVKDDKTRFALALECGNIDIALEAARTIDEKLCWEKLAEAALLQGNHQVVEMAYQRTKNFDRLSFLYLITGNLDKLRKMMKIAEIRKDMSAHFRDSLFLGDVSEQIKILEQSGHTTMAYMTSQRYGLEDSSERYDHTWTKIHSXTGGVRRPGRGSTAQPLRVMDENWPLLTVSKSFFEGAVSAKQ…	0.53	1.72
	EES5, 2-5, 8	EZ761419	contig18962:1:2389:2|similar to Coatomer subunit alpha (P53621)|Evalue: 0.0	718	90799	12	21.9	795	6.15	CFRSFESIVIKNLKNEXGGKKIQLSNCDEIYYAGTGVLLYRDGDYVIMYDLQQKAALASARVPKVKYVIWSNDMAFVALLSKHSVTLCNRNLETLSTIQESVNVKSGAWDENNIFIYTTSNHIKYSIANGDFGIIRTLDFTIYITRIKGSNVYCLDRECNPRVLSIDPTEYRFKLAVCQRRYDEVLHMVKHAKLIGQSIIAYLQLKGYPEIALHFVKDDKTRFALALECGNIDIALEAARTIDEKLCWEKLAEAALLQGNHQVVEMAYQRTKNFDRLSFLYLITGNLDKLRKMMKIAEIRKDMSAHFRDSLFLGDVSEQIKILEQSGHTTMAYMTSQRYGLEDSSERYDHTWTKIHSXTGGVRRPGRGSTAQPLRVMDENWPLLTVSKSFFEGAVSAKQ…	0.53	1.47
	TS4, 4-6	EZ761419	contig18962:1:2389:2|similar to Coatomer subunit alpha (P53621)|Evalue: 0.0	548	90799	11	16.5	795	6.15	CFRSFESIVIKNLKNEXGGKKIQLSNCDEIYYAGTGVLLYRDGDYVIMYDLQQKAALASARVPKVKYVIWSNDMAFVALLSKHSVTLCNRNLETLSTIQESVNVKSGAWDENNIFIYTTSNHIKYSIANGDFGIIRTLDFTIYITRIKGSNVYCLDRECNPRVLSIDPTEYRFKLAVCQRRYDEVLHMVKHAKLIGQSIIAYLQLKGYPEIALHFVKDDKTRFALALECGNIDIALEAARTIDEKLCWEKLAEAALLQGNHQVVEMAYQRTKNFDRLSFLYLITGNLDKLRKMMKIAEIRKDMSAHFRDSLFLGDVSEQIKILEQSGHTTMAYMTSQRYGLEDSSERYDHTWTKIHSXTGGVRRPGRGSTAQPLRVMDENWPLLTVSKSFFEGAVSAKQ…	0.48	0.91
	AS8, 4-8	EZ761234	contig18153:1:1867:2|similar to Coatomer subunit beta~ (Q5R664)|Evalue: 0.0	364	71140	9	17.2	622	5.29	LYNGQVHIWNYETQTMVKTFEVCDLPVRNSKFCARKSWVITGSDDMQIRVFNYNTLERVHSFEAHSDYVRCIVVHPTQPFILTSSDDMTIKLWDWEKKWQCTQTFEGHTHYVMQIVINPKDNNTFASASLDRTIKVWQLGSTSPNFTLEGHEKGVNCVDYYYGGEKPYLISGADDKLVKIWDYQNKNCVQTLDGHTQNVSAVAFHPDLPIILTGSEDGTVRVWHANTYRLESTLNYGLERVWTICCMKGSNSVAMGYDEGSVVLKLGREEPAVSMDNSGKIIWAKHSEIQQANLKSISDAESKDGERLPLSVKDMGSCEIYPQTIAHSPNGRFVVVCGDGEYIIYTAMALRNKSFGGAQEFVWSQDSSGYAIRETASSIKLFQNFKESKTLKPDFSADG…	0.5	1.24
	EES7, 2-7	EZ761234	contig18153:1:1867:2|similar to Coatomer subunit beta~ (Q5R664)|Evalue: 0.0	333	71140	7	15.1	622	5.29	LYNGQVHIWNYETQTMVKTFEVCDLPVRNSKFCARKSWVITGSDDMQIRVFNYNTLERVHSFEAHSDYVRCIVVHPTQPFILTSSDDMTIKLWDWEKKWQCTQTFEGHTHYVMQIVINPKDNNTFASASLDRTIKVWQLGSTSPNFTLEGHEKGVNCVDYYYGGEKPYLISGADDKLVKIWDYQNKNCVQTLDGHTQNVSAVAFHPDLPIILTGSEDGTVRVWHANTYRLESTLNYGLERVWTICCMKGSNSVAMGYDEGSVVLKLGREEPAVSMDNSGKIIWAKHSEIQQANLKSISDAESKDGERLPLSVKDMGSCEIYPQTIAHSPNGRFVVVCGDGEYIIYTAMALRNKSFGGAQEFVWSQDSSGYAIRETASSIKLFQNFKESKTLKPDFSADG…	0.37	0.75
	TS4, 4-6, 8	EZ761234	contig18153:1:1867:2|similar to Coatomer subunit beta~ (Q5R664)|Evalue: 0.0	166	71140	5 (4)	7.9	622	5.29	LYNGQVHIWNYETQTMVKTFEVCDLPVRNSKFCARKSWVITGSDDMQIRVFNYNTLERVHSFEAHSDYVRCIVVHPTQPFILTSSDDMTIKLWDWEKKWQCTQTFEGHTHYVMQIVINPKDNNTFASASLDRTIKVWQLGSTSPNFTLEGHEKGVNCVDYYYGGEKPYLISGADDKLVKIWDYQNKNCVQTLDGHTQNVSAVAFHPDLPIILTGSEDGTVRVWHANTYRLESTLNYGLERVWTICCMKGSNSVAMGYDEGSVVLKLGREEPAVSMDNSGKIIWAKHSEIQQANLKSISDAESKDGERLPLSVKDMGSCEIYPQTIAHSPNGRFVVVCGDGEYIIYTAMALRNKSFGGAQEFVWSQDSSGYAIRETASSIKLFQNFKESKTLKPDFSADG…	0.2	0.63
	AS6, 5	EZ761023	contig17101:1:466:1|similar to Coatomer subunit alpha (Q8CIE6)|Evalue: 2e-58	61	17779	2	14.2	155	8.45	DQTVRIWNWQSRNSISILTGHNHYVMCAQFHPSEDMIISASLDQTIRVWDTSGLRKKHAXAGPGAMDLVRAPGQTRAVWADRCGGXKFVLEGHDRGVNWATFHPTMKLIVSGSDDRQVKVWRYSQDKAWEIDSCRGHYNNVSCVTFSPNQELILA	0.42	0.61
	EES5, 2, 3	EZ761023	contig17101:1:466:1|similar to Coatomer subunit alpha (Q8CIE6)|Evalue: 2e-58	64	17779	3 (2)	13.5	155	8.45	DQTVRIWNWQSRNSISILTGHNHYVMCAQFHPSEDMIISASLDQTIRVWDTSGLRKKHAXAGPGAMDLVRAPGQTRAVWADRCGGXKFVLEGHDRGVNWATFHPTMKLIVSGSDDRQVKVWRYSQDKAWEIDSCRGHYNNVSCVTFSPNQELILA	0.42	0.8
	TS5, 6	EZ761023	contig17101:1:466:1|similar to Coatomer subunit alpha (Q8CIE6)|Evalue: 2e-58	35	17779	1	5.8	155	8.45	DQTVRIWNWQSRNSISILTGHNHYVMCAQFHPSEDMIISASLDQTIRVWDTSGLRKKHAXAGPGAMDLVRAPGQTRAVWADRCGGXKFVLEGHDRGVNWATFHPTMKLIVSGSDDRQVKVWRYSQDKAWEIDSCRGHYNNVSCVTFSPNQELILA	0.19	0.38
	AS8, 5	EZ760339	contig08624:1:837:3|similar to Coatomer subunit gamma (Q9QZE5)|Evalue: 2e-91	188	30726	3	18	278	9.03	HSAEDVIIVTSSLMKDMTGKEEAYRAPAIRALSQIVDAAMLQSFERYMKQAIVDKNVAVASAALVSSLHLARGPAVEVIKRWSSEVAEATNSENAMVQYHALGLLYHIRKSDRLAVNKLIAKFTTGRFLKSPLAVCFLVRIVAKTVQEEATQGAQVSTGLFDFLESCLRHKNEMVVYEAASAMVNLRHYTGRELAPAISVLQLFCSSPKPTIRFTAVRTLSQVAMTHPAAVQACNMDLENLITDSNRSIATLAITTLLKTGNESNVDRLMKQIASFMN	0.36	0.47
	EES7, 2, 3	EZ760339	contig08624:1:837:3|similar to Coatomer subunit gamma (Q9QZE5)|Evalue: 2e-91	274	30726	4	29.9	278	9.03	HSAEDVIIVTSSLMKDMTGKEEAYRAPAIRALSQIVDAAMLQSFERYMKQAIVDKNVAVASAALVSSLHLARGPAVEVIKRWSSEVAEATNSENAMVQYHALGLLYHIRKSDRLAVNKLIAKFTTGRFLKSPLAVCFLVRIVAKTVQEEATQGAQVSTGLFDFLESCLRHKNEMVVYEAASAMVNLRHYTGRELAPAISVLQLFCSSPKPTIRFTAVRTLSQVAMTHPAAVQACNMDLENLITDSNRSIATLAITTLLKTGNESNVDRLMKQIASFMN	0.51	0.73
	TS8, 4, 5	EZ760339	contig08624:1:837:3|similar to Coatomer subunit gamma (Q9QZE5)|Evalue: 2e-91	226	30726	5 (4)	16.9	278	9.03	HSAEDVIIVTSSLMKDMTGKEEAYRAPAIRALSQIVDAAMLQSFERYMKQAIVDKNVAVASAALVSSLHLARGPAVEVIKRWSSEVAEATNSENAMVQYHALGLLYHIRKSDRLAVNKLIAKFTTGRFLKSPLAVCFLVRIVAKTVQEEATQGAQVSTGLFDFLESCLRHKNEMVVYEAASAMVNLRHYTGRELAPAISVLQLFCSSPKPTIRFTAVRTLSQVAMTHPAAVQACNMDLENLITDSNRSIATLAITTLLKTGNESNVDRLMKQIASFMN	0.51	0.98
adaptor complexes medium subunit family. Delta-COP subfamily.	AS11, 10, 15, 16, 18, 19	EZ760051	contig06493:1:1427:3|similar to Coatomer subunit delta (Q5XJY5)|Evalue: 4e-144	332	53312	7	23.2	475	7.25	VLLAACVCNRQGKGLISRQFVEMTRSRIEGLLSSFPKLMTPGKQHTFVETDSVRYVYQPIDRIYMVLITTKASNILEDLETLRLFSRVIPEYCKSMDEPEVLKNAFQLIAAFDEIVALGYRENVSLAQIRTFTEMDSHEERVQMAIRQTQEREAKDAAKRKARELTQLRKDAAKTGGRGAMGGMGSQALPNISSQIKSPQESSRAFDTEKTTYTAPKVTSAKAMKLGAKAKDVDQFVDMLKSEGEKVSVTNRPAAPSATTVIHSNEESVHIRSEEKLTMSARRDGGLQNLEILGLMSFRITDERFARLALKISAEDDRAQIQLHPKFDKQRWQSMQLVALKNPDEAFPLNNEISALKWRFQTTDESHIPLSINCWPTESGTGSQVNIEFSLNEAFENVE…	0.52	1.11
	EES10, 9	EZ760051	contig06493:1:1427:3|similar to Coatomer subunit delta (Q5XJY5)|Evalue: 4e-144	422	53312	12 (11)	29.9	475	7.25	VLLAACVCNRQGKGLISRQFVEMTRSRIEGLLSSFPKLMTPGKQHTFVETDSVRYVYQPIDRIYMVLITTKASNILEDLETLRLFSRVIPEYCKSMDEPEVLKNAFQLIAAFDEIVALGYRENVSLAQIRTFTEMDSHEERVQMAIRQTQEREAKDAAKRKARELTQLRKDAAKTGGRGAMGGMGSQALPNISSQIKSPQESSRAFDTEKTTYTAPKVTSAKAMKLGAKAKDVDQFVDMLKSEGEKVSVTNRPAAPSATTVIHSNEESVHIRSEEKLTMSARRDGGLQNLEILGLMSFRITDERFARLALKISAEDDRAQIQLHPKFDKQRWQSMQLVALKNPDEAFPLNNEISALKWRFQTTDESHIPLSINCWPTESGTGSQVNIEFSLNEAFENVE…	1.05	1.11
	TS11, 10	EZ760051	contig06493:1:1427:3|similar to Coatomer subunit delta (Q5XJY5)|Evalue: 4e-144	398	53312	10 (9)	27.4	475	7.25	VLLAACVCNRQGKGLISRQFVEMTRSRIEGLLSSFPKLMTPGKQHTFVETDSVRYVYQPIDRIYMVLITTKASNILEDLETLRLFSRVIPEYCKSMDEPEVLKNAFQLIAAFDEIVALGYRENVSLAQIRTFTEMDSHEERVQMAIRQTQEREAKDAAKRKARELTQLRKDAAKTGGRGAMGGMGSQALPNISSQIKSPQESSRAFDTEKTTYTAPKVTSAKAMKLGAKAKDVDQFVDMLKSEGEKVSVTNRPAAPSATTVIHSNEESVHIRSEEKLTMSARRDGGLQNLEILGLMSFRITDERFARLALKISAEDDRAQIQLHPKFDKQRWQSMQLVALKNPDEAFPLNNEISALKWRFQTTDESHIPLSINCWPTESGTGSQVNIEFSLNEAFENVE…	0.72	0.78
	TS15	EZ759854	contig05225:1:509:3|similar to Coatomer subunit epsilon (Q60445)|Evalue: 3e-36	112	19029	4 (3)	25.4	169	5.64	KAKVASAEQKLERDTFLYSAYIGLGKYKLVLDELKNTSAEELKFIRMEAEYLQALKSGQSALNRREGVVKELDERLNASGISDSAMLIIAAASIYIHEDNLEKALRILHQSNHLQCLAYTVYVYLKMNVVEAARKTVKSMQELDEDSTVTQIAEASVHLCTNGEKVQEA	0.63	0.63
	AS7, 5, 7-10, 17	EZ759654	contig03994:94:3063:1|similar to Coatomer subunit beta (Q5R922)|Evalue: 0.0	1239	111282	23 (21)	29.2	989	5.41	MVAAKMASTELPCYTLINFGNDGDTPTDIQLKSDLEKGDTKQKMEALQKLIRLMLSGEKMPSMLMTIIRFVLPLQDHAIKKLLLLFWEIVPKTTADGKLLHEMILVCDAYRKDLQHPNEFIRGSTLRFLCKLKEPELLEPLMPAIRACLEHRHSYVRRNAVFAIFVIYKNFDFLIPDAPELVGTFLESEQDMSCKRNAFMMLIHVDQERALNYLSGCLDQVNSFGDILQLVIVELIYKVCLANPNERARFIRCIYNLLNSNSGAVRYEAAGTLLTLSSAPSAVRAAAACYIDLIVKESDNNVKLIVLDRLIDLKDSNPTNEKILQELVMDILRVLSSPDLEVRRKTLELALELVSQRNVEEMVLILKKEVQKTNSTVDGEDMDKYRQLLVRTLHTASMK…	0.95	1.19
	EES6, 7	EZ759654	contig03994:94:3063:1|similar to Coatomer subunit beta (Q5R922)|Evalue: 0.0	431	111282	7 (6)	9.4	989	5.41	MVAAKMASTELPCYTLINFGNDGDTPTDIQLKSDLEKGDTKQKMEALQKLIRLMLSGEKMPSMLMTIIRFVLPLQDHAIKKLLLLFWEIVPKTTADGKLLHEMILVCDAYRKDLQHPNEFIRGSTLRFLCKLKEPELLEPLMPAIRACLEHRHSYVRRNAVFAIFVIYKNFDFLIPDAPELVGTFLESEQDMSCKRNAFMMLIHVDQERALNYLSGCLDQVNSFGDILQLVIVELIYKVCLANPNERARFIRCIYNLLNSNSGAVRYEAAGTLLTLSSAPSAVRAAAACYIDLIVKESDNNVKLIVLDRLIDLKDSNPTNEKILQELVMDILRVLSSPDLEVRRKTLELALELVSQRNVEEMVLILKKEVQKTNSTVDGEDMDKYRQLLVRTLHTASMK…	0.19	0.41
	TS7, 4, 5	EZ759654	contig03994:94:3063:1|similar to Coatomer subunit beta (Q5R922)|Evalue: 0.0	572	111282	10	15.8	989	5.41	MVAAKMASTELPCYTLINFGNDGDTPTDIQLKSDLEKGDTKQKMEALQKLIRLMLSGEKMPSMLMTIIRFVLPLQDHAIKKLLLLFWEIVPKTTADGKLLHEMILVCDAYRKDLQHPNEFIRGSTLRFLCKLKEPELLEPLMPAIRACLEHRHSYVRRNAVFAIFVIYKNFDFLIPDAPELVGTFLESEQDMSCKRNAFMMLIHVDQERALNYLSGCLDQVNSFGDILQLVIVELIYKVCLANPNERARFIRCIYNLLNSNSGAVRYEAAGTLLTLSSAPSAVRAAAACYIDLIVKESDNNVKLIVLDRLIDLKDSNPTNEKILQELVMDILRVLSSPDLEVRRKTLELALELVSQRNVEEMVLILKKEVQKTNSTVDGEDMDKYRQLLVRTLHTASMK…	0.34	0.49
exportin family	AS7	EZ758962	contig00357:1:1325:3|similar to Exportin-1 (Q80U96)|Evalue: 3e-154	149	51066	3	7.5	440	5.17	FYEAIGYMITAEADDMSLANLIERLMQLPNQIWDELIQMIQNNSEVSKDIEVLKQFTNILRTNYRTCKSLGNSFVHQLKRNYYDMLNLYKLLSNDISQAVQLNGEVVTKQPQIRAMKAVKKESLRILSWWISKAASPQLVYEYFLPPMLEAFLMDYKSNVPDAREPEVLNLIRSIVDRLESTVNPRIPEIFEAVFECTLEMINKNFEEYPEHRTNFFLLLQSVNSKCFQGLLSIPSNQFKLVIDSIVWAFKHHMRNVAEIGLQILYQLLKNISVQAPEVSQSFYKAYYLNLLEHLFSVASDPTHSGNLSLFSTILAYMFSLVDDKKVXVSLNPAVSNGDNSAFLQQYLQQMLKTGFPHLTDSQIKITVVGMFNLDQNVQLFKEHLRDFLVQIKELTGDD…	0.21	0.21
	EES6	EZ758962	contig00357:1:1325:3|similar to Exportin-1 (Q80U96)|Evalue: 3e-154	225	51066	3	8	440	5.17	FYEAIGYMITAEADDMSLANLIERLMQLPNQIWDELIQMIQNNSEVSKDIEVLKQFTNILRTNYRTCKSLGNSFVHQLKRNYYDMLNLYKLLSNDISQAVQLNGEVVTKQPQIRAMKAVKKESLRILSWWISKAASPQLVYEYFLPPMLEAFLMDYKSNVPDAREPEVLNLIRSIVDRLESTVNPRIPEIFEAVFECTLEMINKNFEEYPEHRTNFFLLLQSVNSKCFQGLLSIPSNQFKLVIDSIVWAFKHHMRNVAEIGLQILYQLLKNISVQAPEVSQSFYKAYYLNLLEHLFSVASDPTHSGNLSLFSTILAYMFSLVDDKKVXVSLNPAVSNGDNSAFLQQYLQQMLKTGFPHLTDSQIKITVVGMFNLDQNVQLFKEHLRDFLVQIKELTGDD…	0.21	0.21
	AS7, 5	EZ761769	contig20690:1:2028:1|similar to Exportin-2 (Q9PTU3)|Evalue: 1e-135	178	77108	5	9.5	675	6.37	QLMQDDSVAFNAIEFLSKVIAQTKCRPLFEREGVLESICEKIIVPNIHFRQSDQEIFGDNPEEFIRRDIEGSDIHTRRRAAADLIRASCRLFESQVTKVLMSFIQRMIQDYQTDCAKNWKLKNSAIFLTSALAAKGQTARLGTVTINPMIDIIGFFTTQVMPHLENAALADQLVLKADCLKYVVTFRAQLSREVLVTLFPALIRHVDSPNTVIYTYATHTIEKILMTRDLQTGVFVVPPTDLQPILQPLLTALLKLRRITGDKENKEGDVALEENTYAIKCIMRTLSYLQAQVLPYLEMIVNGLLERLRFAIKNPGNPHYDHYLFESFALCITIACKAQPASVDVFENALFPLIEVILRDNIDALFPYAFQLLAMMLEFRTDSIPQSYMALLDFLLVPA…	0.23	0.27
	EES1, 3, 4, 6, 7	EZ761769	contig20690:1:2028:1|similar to Exportin-2 (Q9PTU3)|Evalue: 1e-135	348	77108	9 (8)	15	675	6.37	QLMQDDSVAFNAIEFLSKVIAQTKCRPLFEREGVLESICEKIIVPNIHFRQSDQEIFGDNPEEFIRRDIEGSDIHTRRRAAADLIRASCRLFESQVTKVLMSFIQRMIQDYQTDCAKNWKLKNSAIFLTSALAAKGQTARLGTVTINPMIDIIGFFTTQVMPHLENAALADQLVLKADCLKYVVTFRAQLSREVLVTLFPALIRHVDSPNTVIYTYATHTIEKILMTRDLQTGVFVVPPTDLQPILQPLLTALLKLRRITGDKENKEGDVALEENTYAIKCIMRTLSYLQAQVLPYLEMIVNGLLERLRFAIKNPGNPHYDHYLFESFALCITIACKAQPASVDVFENALFPLIEVILRDNIDALFPYAFQLLAMMLEFRTDSIPQSYMALLDFLLVPA…	0.4	0.74
	TS7	EZ761769	contig20690:1:2028:1|similar to Exportin-2 (Q9PTU3)|Evalue: 1e-135	148	77108	4	7.7	675	6.37	QLMQDDSVAFNAIEFLSKVIAQTKCRPLFEREGVLESICEKIIVPNIHFRQSDQEIFGDNPEEFIRRDIEGSDIHTRRRAAADLIRASCRLFESQVTKVLMSFIQRMIQDYQTDCAKNWKLKNSAIFLTSALAAKGQTARLGTVTINPMIDIIGFFTTQVMPHLENAALADQLVLKADCLKYVVTFRAQLSREVLVTLFPALIRHVDSPNTVIYTYATHTIEKILMTRDLQTGVFVVPPTDLQPILQPLLTALLKLRRITGDKENKEGDVALEENTYAIKCIMRTLSYLQAQVLPYLEMIVNGLLERLRFAIKNPGNPHYDHYLFESFALCITIACKAQPASVDVFENALFPLIEVILRDNIDALFPYAFQLLAMMLEFRTDSIPQSYMALLDFLLVPA…	0.18	0.18
	AS7	EZ760893	contig14970:1:594:1|similar to Exportin-2 (Q7SZC2)|Evalue: 4e-27	189	22699	3	22.3	197	6.42	ERFLRQMERTPLYSLRLMQLIDMQQLSQNVRLAAAVTLKNFVKKYXGKNVEDFDVPDADREPVKERLVPLMFHCPSFIQKVVGETITTIAWFDFPVRWQHLLPDLTSKFTSGNADHILGALKTAHGLFKHYRDAFESHGLWAEIKLXLGQFATPFMQXFSATLSQIPALEQNMKESPDKSHAEEALDNTFQYPSVLL	0.51	0.51
	EES6, 3, 1	EZ760893	contig14970:1:594:1|similar to Exportin-2 (Q7SZC2)|Evalue: 4e-27	68	22699	2	10.2	197	6.42	ERFLRQMERTPLYSLRLMQLIDMQQLSQNVRLAAAVTLKNFVKKYXGKNVEDFDVPDADREPVKERLVPLMFHCPSFIQKVVGETITTIAWFDFPVRWQHLLPDLTSKFTSGNADHILGALKTAHGLFKHYRDAFESHGLWAEIKLXLGQFATPFMQXFSATLSQIPALEQNMKESPDKSHAEEALDNTFQYPSVLL	0.32	0.62
	AS4, 5	EZ762150	contig22968:1:1340:2|similar to Exportin-7 (Q5ZLT0)|Evalue: 4e-143	98	51443	2	4.9	446	6.07	LAIIHFFENFRRVYIGDQSPRGVYQVMKDDLGIDDELMVMSIMIRKIVTNLKYWGNSEHVVSKSLQLLNDLSMGYGSIRRMVKLDEIQFLLKNHTPEHFPFLGINSTLVDLRCRTTFYAALARLLIVELADDEDKLEEFMKPIGAEFETLGRLMGSAGTALFNEREAKLAAIGIARDLRGIASAMLNRPSYLALFDWLYPKYFPICQKIVEVWYNDAAVVNPMLKFMCEFAQNRAQRIQFEISSPNGILLFKEVSKMFTNFGTRILTVTDVPKNEIYQKKLKSITIAFAMFKFALMGGYCNFGIFPLYGDPTLDESFQVLIKLIMSISHSDLLEFPKLSLSYYSLIDIVSMNHVEFLNNVDPQVFLYILSSLSEGLHSIDSVVSSACCSTLDNIVSSVY…	0.13	0.19
	EES4, 3, 6	EZ762150	contig22968:1:1340:2|similar to Exportin-7 (Q5ZLT0)|Evalue: 4e-143	80	51443	2	5.4	446	6.07	LAIIHFFENFRRVYIGDQSPRGVYQVMKDDLGIDDELMVMSIMIRKIVTNLKYWGNSEHVVSKSLQLLNDLSMGYGSIRRMVKLDEIQFLLKNHTPEHFPFLGINSTLVDLRCRTTFYAALARLLIVELADDEDKLEEFMKPIGAEFETLGRLMGSAGTALFNEREAKLAAIGIARDLRGIASAMLNRPSYLALFDWLYPKYFPICQKIVEVWYNDAAVVNPMLKFMCEFAQNRAQRIQFEISSPNGILLFKEVSKMFTNFGTRILTVTDVPKNEIYQKKLKSITIAFAMFKFALMGGYCNFGIFPLYGDPTLDESFQVLIKLIMSISHSDLLEFPKLSLSYYSLIDIVSMNHVEFLNNVDPQVFLYILSSLSEGLHSIDSVVSSACCSTLDNIVSSVY…	0.13	0.25
	TS4, 5	EZ762150	contig22968:1:1340:2|similar to Exportin-7 (Q5ZLT0)|Evalue: 4e-143	33	51443	1	2	446	6.07	LAIIHFFENFRRVYIGDQSPRGVYQVMKDDLGIDDELMVMSIMIRKIVTNLKYWGNSEHVVSKSLQLLNDLSMGYGSIRRMVKLDEIQFLLKNHTPEHFPFLGINSTLVDLRCRTTFYAALARLLIVELADDEDKLEEFMKPIGAEFETLGRLMGSAGTALFNEREAKLAAIGIARDLRGIASAMLNRPSYLALFDWLYPKYFPICQKIVEVWYNDAAVVNPMLKFMCEFAQNRAQRIQFEISSPNGILLFKEVSKMFTNFGTRILTVTDVPKNEIYQKKLKSITIAFAMFKFALMGGYCNFGIFPLYGDPTLDESFQVLIKLIMSISHSDLLEFPKLSLSYYSLIDIVSMNHVEFLNNVDPQVFLYILSSLSEGLHSIDSVVSSACCSTLDNIVSSVY…	0.06	0.12
	AS6, 4-11, 13, 14, 16	EZ763230	contig27760:1:458:1|similar to Protein transport protein Sec61 subunit alpha-like 1 (Q90ZM2)|Evalue: 4e-64	114	17091	3	34.2	152	9.39	KSCTPFALTSAEALFHTVSVSRHPNRIXKMAIKFLEIIKPLCGILPEIAKPERKIQFREKVLWTAITLFIFLVCCQIPLFGIMSSESADPFYWIRVILASNRGTLMELGISPIVTSGLIMQLLAGAKIIEVGDTPKDRALFNGAQKLFGMVI	0.72	4.16
	EES13, 4, 5, 11-13	EZ763230	contig27760:1:458:1|similar to Protein transport protein Sec61 subunit alpha-like 1 (Q90ZM2)|Evalue: 4e-64	110	17091	2	29.6	152	9.39	KSCTPFALTSAEALFHTVSVSRHPNRIXKMAIKFLEIIKPLCGILPEIAKPERKIQFREKVLWTAITLFIFLVCCQIPLFGIMSSESADPFYWIRVILASNRGTLMELGISPIVTSGLIMQLLAGAKIIEVGDTPKDRALFNGAQKLFGMVI	0.43	1.69
	TS6, 4-10, 12, 14-16	EZ763230	contig27760:1:458:1|similar to Protein transport protein Sec61 subunit alpha-like 1 (Q90ZM2)|Evalue: 4e-64	141	17091	3	35.5	152	9.39	KSCTPFALTSAEALFHTVSVSRHPNRIXKMAIKFLEIIKPLCGILPEIAKPERKIQFREKVLWTAITLFIFLVCCQIPLFGIMSSESADPFYWIRVILASNRGTLMELGISPIVTSGLIMQLLAGAKIIEVGDTPKDRALFNGAQKLFGMVI	0.72	3.64
	AS13, 4, 5, 7-11, 13-17	EZ759984	contig06044:1:1060:2|similar to Protein transport protein Sec61 subunit alpha-like 1 (Q90ZM2)|Evalue: 1e-179	166	38787	4	13.6	352	7.77	IGQAIVYVMTGMYGEPSDLGPGICLLIVIQLFIAGLIVLLLDELLQKGYGLGSGISLFIATNICETIVWKAFSPTTVNTGRGTEFEGAVIALFHLLATRNDKVRALREAFYRQNLPNLMNLLATFLVFAIVIYFQGFRVDLPIKSARYRGQYSSYPIKLFYTSNIPIILQSALVSNLYVISQMLSSKFGGNFFVSLLGVWADVGDSGPARSYPIGGLCYYLSPPETLSHVATDPIHAFIYILFMLGSCAFFSKTWIDVSGSSAKDVAKQLKEQQMVMRGHREKSMIHELNRYIPTAAAFGGLCIGALSVMADFLGAIGSGTGILLAVTIIYQYFEIFVKEQSEMGGMGALLF	0.39	2.64
	EES13, 1-4, 7, 11, 14	EZ759984	contig06044:1:1060:2|similar to Protein transport protein Sec61 subunit alpha-like 1 (Q90ZM2)|Evalue: 1e-179	159	38787	4 (3)	10.5	352	7.77	IGQAIVYVMTGMYGEPSDLGPGICLLIVIQLFIAGLIVLLLDELLQKGYGLGSGISLFIATNICETIVWKAFSPTTVNTGRGTEFEGAVIALFHLLATRNDKVRALREAFYRQNLPNLMNLLATFLVFAIVIYFQGFRVDLPIKSARYRGQYSSYPIKLFYTSNIPIILQSALVSNLYVISQMLSSKFGGNFFVSLLGVWADVGDSGPARSYPIGGLCYYLSPPETLSHVATDPIHAFIYILFMLGSCAFFSKTWIDVSGSSAKDVAKQLKEQQMVMRGHREKSMIHELNRYIPTAAAFGGLCIGALSVMADFLGAIGSGTGILLAVTIIYQYFEIFVKEQSEMGGMGALLF	0.28	1.37
	TS14, 2, 4-11, 13-16	EZ759984	contig06044:1:1060:2|similar to Protein transport protein Sec61 subunit alpha-like 1 (Q90ZM2)|Evalue: 1e-179	157	38787	4	13.6	352	7.77	IGQAIVYVMTGMYGEPSDLGPGICLLIVIQLFIAGLIVLLLDELLQKGYGLGSGISLFIATNICETIVWKAFSPTTVNTGRGTEFEGAVIALFHLLATRNDKVRALREAFYRQNLPNLMNLLATFLVFAIVIYFQGFRVDLPIKSARYRGQYSSYPIKLFYTSNIPIILQSALVSNLYVISQMLSSKFGGNFFVSLLGVWADVGDSGPARSYPIGGLCYYLSPPETLSHVATDPIHAFIYILFMLGSCAFFSKTWIDVSGSSAKDVAKQLKEQQMVMRGHREKSMIHELNRYIPTAAAFGGLCIGALSVMADFLGAIGSGTGILLAVTIIYQYFEIFVKEQSEMGGMGALLF	0.28	2.3
	AS8, 4, 7	EZ762203	contig23239:932:3391:2|similar to Protein transport protein sec23 (Q5BGR9)|Evalue: 0.0	736	92725	14 (12)	19.5	819	6.66	MATYNGYEADYASQMQQQQQQQSYASQQDYQQQQYSSQQQTTPPQAQQPQYNMMEVVREQERLDGARFTWNVWPCSRLEATRVVVPFGMFFMPLKSRSDLPPLMYEPVRCTRCTGVLNPYCQVDYRTKGWMCALCSQKNGFPPQYAAISEQQRPAELLPQFTTLEYILPRSHGMPPIFLFCVDTCLDEDDLQALKESIQASIGALPPNAHVGLITFGRVVQVHELGAEHIPRSFVFRGTKDLTAKQLQDLLGIGKFAGTPQQPQTVKGQPGQPAVTHPPNRFIQPVEKCEASLLSIVSEIQRDPWTVSPGKRSLRSTGVAMSIAVSLLEISFPNTGAAIMTFIGGPCTQGPGMVVADELKTPIRSHNDIVKDNAPFMKRAIKFYDTLAKRAATNCHALD…	0.52	0.79
	EES7, 3, 4	EZ762203	contig23239:932:3391:2|similar to Protein transport protein sec23 (Q5BGR9)|Evalue: 0.0	567	92725	10 (9)	15	819	6.66	MATYNGYEADYASQMQQQQQQQSYASQQDYQQQQYSSQQQTTPPQAQQPQYNMMEVVREQERLDGARFTWNVWPCSRLEATRVVVPFGMFFMPLKSRSDLPPLMYEPVRCTRCTGVLNPYCQVDYRTKGWMCALCSQKNGFPPQYAAISEQQRPAELLPQFTTLEYILPRSHGMPPIFLFCVDTCLDEDDLQALKESIQASIGALPPNAHVGLITFGRVVQVHELGAEHIPRSFVFRGTKDLTAKQLQDLLGIGKFAGTPQQPQTVKGQPGQPAVTHPPNRFIQPVEKCEASLLSIVSEIQRDPWTVSPGKRSLRSTGVAMSIAVSLLEISFPNTGAAIMTFIGGPCTQGPGMVVADELKTPIRSHNDIVKDNAPFMKRAIKFYDTLAKRAATNCHALD…	0.37	0.45
	TS8, 4, 5, 7	EZ762203	contig23239:932:3391:2|similar to Protein transport protein sec23 (Q5BGR9)|Evalue: 0.0	365	92725	7 (6)	9.3	819	6.66	MATYNGYEADYASQMQQQQQQQSYASQQDYQQQQYSSQQQTTPPQAQQPQYNMMEVVREQERLDGARFTWNVWPCSRLEATRVVVPFGMFFMPLKSRSDLPPLMYEPVRCTRCTGVLNPYCQVDYRTKGWMCALCSQKNGFPPQYAAISEQQRPAELLPQFTTLEYILPRSHGMPPIFLFCVDTCLDEDDLQALKESIQASIGALPPNAHVGLITFGRVVQVHELGAEHIPRSFVFRGTKDLTAKQLQDLLGIGKFAGTPQQPQTVKGQPGQPAVTHPPNRFIQPVEKCEASLLSIVSEIQRDPWTVSPGKRSLRSTGVAMSIAVSLLEISFPNTGAAIMTFIGGPCTQGPGMVVADELKTPIRSHNDIVKDNAPFMKRAIKFYDTLAKRAATNCHALD…	0.23	0.38
	AS6	EZ761528	contig19453:1:881:3|similar to Protein transport protein Sec24C (P53992)|Evalue: 6e-59	92	33260	3	12	292	7.85	VALLYTSLTGQRRIRVLNMALNSSTEFPEIYRCAEIDVVLNFMMKNAIRGLFEHSPSAIREGLAQRIVRILVTYRKHCSSHTPAGQLVLPESLKLLPVYACALARNDVISGTGAEVGADDRSWLLLHANSLSVNHSTSFLYPRVFVLYSANISSGQAGFRQIRATVDKIDETGAYLLENGVSMFMWIGSRVDASWLESIFGTNNLAQVDVEKGDSILYQTDNDTVNELRKFIESVRSQRVVYMRLTIVRQRDKLDGWFRRFLVEDKGSVAAQQSYVDYIYYLYNGIRDELDK	0.33	0.33
	AS6	EZ760232	contig07781:1:1003:1|similar to Protein transport protein Sec24C (P53992)|Evalue: 4e-109	156	38418	3	12.9	334	5.53	RPELYCGSYEFVASKEYCREDRPPKPPAFIFMIDVSYRAVSSGFVSLLCRALRDELESLLPLDVSREESKLRVGFATFSDCVHFFNLKSGLSKPQMMTVTDLSDMFVPLVEGFLVRVDQCRAMVSSLLDQIPVMFAESRQTDTILYPAIQAGMRALEAAGCAGKLFVFNFSLPIFQAPGQLKNREDRSLLGTDKEKTILKPQIAEYTEFAKECVNVGCCVDLFLFPNAYIDVATLGEVSRLTGGQVYKYAYFQADKDGQRFLWDLRHNLKRSIGFDAVXXVFVPMLAYVRPNFFGNFYMPNMTEIHLAAVDSEKCILAEIKHDDKMEDKQFAHI	0.28	0.28
NUP54 family	TS9	EZ762206	contig23247:1:1409:3|similar to Nucleoporin p54 (Q8BTS4)|Evalue: 9e-46	99	52608	2	6.2	468	5.74	KHWFAVRWSADEWRTVWSAATDSLFGGQQTGTGLFGVTGTSQPFSLSQPQTQSFFGSQPTQQQQQSQPTISADADYAARLAASVNTPFVFGDERDQTLTKFNQFQALLGSGKALYALNQPPLDLTPENVFCKWKSVVYVPKPDATDEEGVVSLRFKKSGSEVSDVRYELGELLHKLFGARPNVSVEIDGINPIASDKCELLFHLIERLPDTNVRRVPASDVALFLTQPAQKANLQLMAVDDLQPKLGFTKEIEKQYLEKVPSGINPYMWYQAQNDNPNPSLLIPLPVIGFEELYTLLKKEESLLKVNEQISEELQSRVDAFRAHRDQSKQVLTNYEQKLHNLQLRIIKVFCHLQSSSRVGMNLDSFEQNLSHDVKQIQEVIDAPPKSLSSRIRDLSSCV…	0.13	0.13
	AS10	EZ760757	contig12446:1:1813:2|similar to Nucleoporin NUP85 (Q4QQS8)|Evalue: 3e-23	116	71167	2	3.6	603	5.55	SSLDFRGKNWNSCSKTTRMDAENRTTRGVTSLINKSADVFFKIQDSAETLSSAELIESSKKYYTLIRELADMSYDVRALMLAKDEEEEALRFFTMIYDLQILWDLCHILWLDLGQRNKPSKGLFMNRLLEWQESHLQALSKVAAKPEEMFSPQYKSEDSGQWDLITAFILSGKIHDAKVEVEELTTFDSNAAVQALHIVLDTRPKTWETVEDERNFNLWRTTVENLLLTADIQRHRQVTRILNLMTGNYQTWFDYSSLFTSWVPFFICKLFHQNPFLDPSEIDKVHTYISNAKIVVKSAGTVSPEILSIIEWVFHYDYDRVFEKSRMYFGVVYMWFNVHMCDVISHLNKRTPLRITADVDEIPHIRESFIFDYVESGLRSGQWLPYILYTRHCPTMQSD…	0.09	0.09
	TS11	EZ759465	contig03033:1:1390:2|similar to Nucleoporin GLE1 (Q4KLN4)|Evalue: 3e-23	30	52111	1	1.5	462	6.1	DRYRNGGFILGNDLVSRKLVTNVXGMPSQEPVKSTQESIDDEEYELEHWHTTHHSNLASLNSGNGYSAAAPSMPCDINSMIASFITKPKGNESIQQTVQEKDQQRVKSVDELLADEYELSRSKLLDCIRQIQSIDSDAALKKLKQSFMFASSNPVVTCSPNSPMEVVEPFRKAFMLLRGKEVDGNAMRVKASDAEGGHQFVRYIIAKKSIDLASQQTEEKNESKLFALAALVTELWACDDXXDLATFFLGILRSECPATVPHYKTPSIKADVDRPQEIKRLTALVKFYAAIMQTDRSLMLTRLFPGRLFDSRHPHGMDAAWHVMAGLANLTPEVDVTAVVLHAILTIAGYKFLRLYGKQAMKLIRLYRNDLLPMIRKVTPQNSMAPVERLSMLLESVLR…	0.06	0.12
	EES12	EZ759168	contig01482:1:1207:2|similar to Nucleoporin SEH1 (Q8R2U0)|Evalue: 3e-108	83	45551	2	9.2	401	6.52	DFLTRKWQILHFSKQLLXKQISSEMSLAQPIPADHKDLIHDVALDYYGRRMATCSSDQSVKIWDLQDDNQWKCVANWKTHSGSVWKVTWAHPLYGQVIATCSFDRTAALWEEIVGDGSSTAQSHWVKRMTFVDSKGSVTDVQFAPKQNVFLLATTSVDGFIRIYENIDQSNLAQWQMQHEFPSKLQSITCIAWSQSKIYPNDPPMIAVGSDDEGPQTSKVALFELTDGRKWTRIESLNIITEPVHDLTFANTLGRSFHTLAVASRELLIVTIMPSQRSTSVSGSMQASQAQRTYDVRMSARFDDHDSKVWRVSWNITGTILASSGDDGCIRLWRANYANVWRCIAVISGDGSLKHESLDNERSTKTMPENGSFYMSNNTLMTWPTHKSASPGIHVWSPP…	0.15	0.15
synaptophysin/synaptobrevin family	AS16, 4, 5, 15	EZ762423	contig24037:1:610:3|similar to Synaptoporin (Q8BGN8)|Evalue: 1e-27	98	22933	3 (2)	12.4	202	6.1	VGFTYDCNSPGSTRKEWRIPFSYPFNLDDIRFPKDPCNQTTDASQHNLGYPLSSSAEFFVAVGVLAFLYCLAALLLYIFLDKLYRASLRVPTIDFVVTVIFAFLWLVCSATWAHGVMAVKTFTSPDAVAKTMTDGSSPMDARCTSCVAGTPPNYTNINVSVIFGFLNFFIWSANLWFLYKETSWYAGKENQYADNRPVTGVP	0.31	0.76
transport	EES15, 5, 13-15	EZ762423	contig24037:1:610:3|similar to Synaptoporin (Q8BGN8)|Evalue: 1e-27	111	22933	2	12.4	202	6.1	VGFTYDCNSPGSTRKEWRIPFSYPFNLDDIRFPKDPCNQTTDASQHNLGYPLSSSAEFFVAVGVLAFLYCLAALLLYIFLDKLYRASLRVPTIDFVVTVIFAFLWLVCSATWAHGVMAVKTFTSPDAVAKTMTDGSSPMDARCTSCVAGTPPNYTNINVSVIFGFLNFFIWSANLWFLYKETSWYAGKENQYADNRPVTGVP	0.31	0.92
	TS16, 4-6, 15	EZ762423	contig24037:1:610:3|similar to Synaptoporin (Q8BGN8)|Evalue: 1e-27	130	22933	4 (2)	12.4	202	6.1	VGFTYDCNSPGSTRKEWRIPFSYPFNLDDIRFPKDPCNQTTDASQHNLGYPLSSSAEFFVAVGVLAFLYCLAALLLYIFLDKLYRASLRVPTIDFVVTVIFAFLWLVCSATWAHGVMAVKTFTSPDAVAKTMTDGSSPMDARCTSCVAGTPPNYTNINVSVIFGFLNFFIWSANLWFLYKETSWYAGKENQYADNRPVTGVP	0.31	1.07
Channels
	AS8, 7	EZ761050	contig17293:1:839:3|similar to Cullin-5 (Q29425)|Evalue: 3e-59	90	32097	2	11.2	278	6.71	ATHTWLLVLNANNTLKRTSDEMIKCVVVQPVIYETLIAEGRKWIADRRPSELNKLFKLLDKHQDEGVKPLIAEVQQYIVRKGKEDMLEAAEASETILSDPEKYAEKLLTLFQSFSELVKAAFGDDHRFTSARDKSFSEVVNDTTIFKLELGKEKGKSLTPPESRCPELLATYCDTLLRKTSKRLTSEEISHQLDGVTQLLKYVQGKDVFMRFHTTHLMRRLILGISADSEKEEDFSRELQKIGMPPELLGRIARMFLDIRVSEELNREWSSLRATMVK	0.22	0.32
	EES7	EZ761050	contig17293:1:839:3|similar to Cullin-5 (Q29425)|Evalue: 3e-59	134	32097	3	13.7	278	6.71	ATHTWLLVLNANNTLKRTSDEMIKCVVVQPVIYETLIAEGRKWIADRRPSELNKLFKLLDKHQDEGVKPLIAEVQQYIVRKGKEDMLEAAEASETILSDPEKYAEKLLTLFQSFSELVKAAFGDDHRFTSARDKSFSEVVNDTTIFKLELGKEKGKSLTPPESRCPELLATYCDTLLRKTSKRLTSEEISHQLDGVTQLLKYVQGKDVFMRFHTTHLMRRLILGISADSEKEEDFSRELQKIGMPPELLGRIARMFLDIRVSEELNREWSSLRATMVK	0.34	0.34
	AS5, 7	EZ759699	contig04295:229:1159:1|similar to Inositol 1,4,5-trisphosphate receptor type 1 (Q14643)|Evalue: 1e-84	39	35754	1	4.2	310	5.23	MSLFDGSSGNKGXREKTNLRALRDTTILYNLAPIVICICGLCIHEFFYGLLLLDIVHREETLLNVINSVTRNVRSILLTAVLAIILVYMTSMIGFLLFSEDFVREVDPTPPLTTDFGALVNDTTVLESAQYCSADGLDKCAEGIHIKXECNVTAITVEKSGGEPEREFVCDTLIMCIVTSLNHGLRNGGGIGDILRSRSKDDPMFFPRVIYDMVYFFIIIVITLNLIFGVIIDTFADLRSEKQQKEEILKNTCFICGLDRSAFDNKKISFDEHCRKEHNLWHYLYFMVLLRVKDPTEFTGPESYVFQMIK	0.09	0.09
	EES11, 6, 9-12	EZ759699	contig04295:229:1159:1|similar to Inositol 1,4,5-trisphosphate receptor type 1 (Q14643)|Evalue: 1e-84	34	35754	1	1.9	310	5.23	MSLFDGSSGNKGXREKTNLRALRDTTILYNLAPIVICICGLCIHEFFYGLLLLDIVHREETLLNVINSVTRNVRSILLTAVLAIILVYMTSMIGFLLFSEDFVREVDPTPPLTTDFGALVNDTTVLESAQYCSADGLDKCAEGIHIKXECNVTAITVEKSGGEPEREFVCDTLIMCIVTSLNHGLRNGGGIGDILRSRSKDDPMFFPRVIYDMVYFFIIIVITLNLIFGVIIDTFADLRSEKQQKEEILKNTCFICGLDRSAFDNKKISFDEHCRKEHNLWHYLYFMVLLRVKDPTEFTGPESYVFQMIK	0.09	0.18
	TS6, 5, 10	EZ759699	contig04295:229:1159:1|similar to Inositol 1,4,5-trisphosphate receptor type 1 (Q14643)|Evalue: 1e-84	26	35754	1	1.9	310	5.23	MSLFDGSSGNKGXREKTNLRALRDTTILYNLAPIVICICGLCIHEFFYGLLLLDIVHREETLLNVINSVTRNVRSILLTAVLAIILVYMTSMIGFLLFSEDFVREVDPTPPLTTDFGALVNDTTVLESAQYCSADGLDKCAEGIHIKXECNVTAITVEKSGGEPEREFVCDTLIMCIVTSLNHGLRNGGGIGDILRSRSKDDPMFFPRVIYDMVYFFIIIVITLNLIFGVIIDTFADLRSEKQQKEEILKNTCFICGLDRSAFDNKKISFDEHCRKEHNLWHYLYFMVLLRVKDPTEFTGPESYVFQMIK		0
MIP/aquaporin (TC 1.A.8) family.	AS6, 5	EZ762956	contig26144:1190:2191:2|similar to Aquaporin-9 (O43315)|Evalue: 8e-43	48	37819	1	2.7	333	9.03	MQKMSEKPLYRAAENPTRNADRRAGRFEEEELISKTGRHPDMVIQFQDDADDQHTSHYEGNWRHYFHKKLHIKNRLIRDWLSESLAMFLFMSLLLGGAATAHFTGKQDDPMLTAVFHGFSAVFGIYVGAGVSGGIINPALTFAVALLGRVSWRKCLVLVSAQYFGSFIASAVVYLIYYESLQNYAKTADDNGEFLQKTAGIWSTFPKPYLSMTGAIFNQIFCTMLLSIGFLSISDHKNFRPTKGLFPFAVGLLIMTVFLAFSYSAGAAMNPARDLSPRLWSLIIGYGNEVFSHNDYKWFWIPWLFPYVGALFGAVMYQIFVGVHWPDKQSTKR	0.09	0.18
	AS16, 15	EZ762494	contig24282:1:693:1|similar to Aquaporin-10 (Q96PS8)|Evalue: 3e-39	99	25629	1	7	230	8.23	PAVTLAFAVINKCKWRKVPVYMAAQYLGAWVGSAILTAIYYDALHNHDQGNRTIETAGIYASYPQEFLTWQGGLADQIFATLLLMMGILALTDERNMVGPTGRAYVPLLVGLLVLAIGLAFGFNCGYPINPARDFGPRLFTAMAGWGTQVFSEPRGTYNWWWIPIIGPHVGAIIGALAYNFFIGYHWPKERDDVQLQSPSSPIVIVKNDAYQPLRPSRSVYSEELRITTS	0.13	0.26
	AS15, 4-19	EZ761061	contig17421:247:1275:1|similar to Aquaporin-4 (Q5I4F9)|Evalue: 2e-36	271	37810	11 (5)	15.2	342	7.04	MKFLYDPDVPLEDFRNVRYWKAALAEFLGTFFLLFLTIGTVVTTLPSEYNTNKLTIAFTFGFTLCILYWIFGHVSGAHFNPAVTIGMLVARRISLLRALLYIAMQILGALAGAGLIYSIASVNTQRTWFGCTVLAGNNWTSPAGNIVDANGQVIAGPGYLGDASGAVGTNSPAPLSRDSAIVNAMGIGHIITRDYIGYAHGLLVEFIITAVLVMVYLACLDMRRVDTYGSGSLAVGFAYFVLTLFAVPWTMASMNPARSLATAVVRGEQCWNNHWIYWIGPILGGIVAGLLYDFVFASDASWKKIREYRTNNYVRTEHIEIDQRQPLHQVYTKTETVENPGA	0.96	5.52
	EES14, 1-23	EZ761061	contig17421:247:1275:1|similar to Aquaporin-4 (Q5I4F9)|Evalue: 2e-36	402	37810	35 (8)	20.2	342	7.04	MKFLYDPDVPLEDFRNVRYWKAALAEFLGTFFLLFLTIGTVVTTLPSEYNTNKLTIAFTFGFTLCILYWIFGHVSGAHFNPAVTIGMLVARRISLLRALLYIAMQILGALAGAGLIYSIASVNTQRTWFGCTVLAGNNWTSPAGNIVDANGQVIAGPGYLGDASGAVGTNSPAPLSRDSAIVNAMGIGHIITRDYIGYAHGLLVEFIITAVLVMVYLACLDMRRVDTYGSGSLAVGFAYFVLTLFAVPWTMASMNPARSLATAVVRGEQCWNNHWIYWIGPILGGIVAGLLYDFVFASDASWKKIREYRTNNYVRTEHIEIDQRQPLHQVYTKTETVENPGA	1.97	15.82
	TS15, 4-19	EZ761061	contig17421:247:1275:1|similar to Aquaporin-4 (Q5I4F9)|Evalue: 2e-36	288	37810	12 (5)	15.2	342	7.04	MKFLYDPDVPLEDFRNVRYWKAALAEFLGTFFLLFLTIGTVVTTLPSEYNTNKLTIAFTFGFTLCILYWIFGHVSGAHFNPAVTIGMLVARRISLLRALLYIAMQILGALAGAGLIYSIASVNTQRTWFGCTVLAGNNWTSPAGNIVDANGQVIAGPGYLGDASGAVGTNSPAPLSRDSAIVNAMGIGHIITRDYIGYAHGLLVEFIITAVLVMVYLACLDMRRVDTYGSGSLAVGFAYFVLTLFAVPWTMASMNPARSLATAVVRGEQCWNNHWIYWIGPILGGIVAGLLYDFVFASDASWKKIREYRTNNYVRTEHIEIDQRQPLHQVYTKTETVENPGA	0.8	6.56
	AS13, 4-15	EZ759721	contig04424:252:1300:3|similar to Aquaporin-10 (Q96PS8)|Evalue: 4e-56	430	37958	7 (6)	26.9	349	7.68	MADAPTYIRQSTTGTATTAPTTMPVHPDTTYYKTTTTTVSDAPRAIADVNDDNHDNYDETTGLRSGEKKTRPLVTSTTAPIDAGRMTLGQKISRWTRIGSDLAREALAEFLGSFILIVFGNGVVAQVVLSRGAHGNFLSINIGYGLAVAFGVYIAGGISGGHLNPAVSLAFAALGKLPWRKLPVYMFAQYAGCICASAIVHAIYYDALNNYDGGNRTRGDTWQSTAGIHASYPQEFLYWQTGLADQIFATSFLMIGILALTDNRNTGPPGGVVPILVGCLVMAIGLAYGFNCGYPINPARDMGPRLFTLMAGWGSRTFSNYNPYIFNDYYQRIPYWFWIPVVGPHLGAL	0.8	4.67
	EES12, 4-8, 10-13	EZ759721	contig04424:252:1300:3|similar to Aquaporin-10 (Q96PS8)|Evalue: 4e-56	354	37958	5	24.9	349	7.68	MADAPTYIRQSTTGTATTAPTTMPVHPDTTYYKTTTTTVSDAPRAIADVNDDNHDNYDETTGLRSGEKKTRPLVTSTTAPIDAGRMTLGQKISRWTRIGSDLAREALAEFLGSFILIVFGNGVVAQVVLSRGAHGNFLSINIGYGLAVAFGVYIAGGISGGHLNPAVSLAFAALGKLPWRKLPVYMFAQYAGCICASAIVHAIYYDALNNYDGGNRTRGDTWQSTAGIHASYPQEFLYWQTGLADQIFATSFLMIGILALTDNRNTGPPGGVVPILVGCLVMAIGLAYGFNCGYPINPARDMGPRLFTLMAGWGSRTFSNYNPYIFNDYYQRIPYWFWIPVVGPHLGAL	0.52	1.8
	TS5, 4-14	EZ759721	contig04424:252:1300:3|similar to Aquaporin-10 (Q96PS8)|Evalue: 4e-56	361	37958	7 (6)	26.9	349	7.68	MADAPTYIRQSTTGTATTAPTTMPVHPDTTYYKTTTTTVSDAPRAIADVNDDNHDNYDETTGLRSGEKKTRPLVTSTTAPIDAGRMTLGQKISRWTRIGSDLAREALAEFLGSFILIVFGNGVVAQVVLSRGAHGNFLSINIGYGLAVAFGVYIAGGISGGHLNPAVSLAFAALGKLPWRKLPVYMFAQYAGCICASAIVHAIYYDALNNYDGGNRTRGDTWQSTAGIHASYPQEFLYWQTGLADQIFATSFLMIGILALTDNRNTGPPGGVVPILVGCLVMAIGLAYGFNCGYPINPARDMGPRLFTLMAGWGSRTFSNYNPYIFNDYYQRIPYWFWIPVVGPHLGAL	0.65	4.1
	TS5, 4	EZ759085	contig01013:1:991:2|similar to Aquaporin-3 (Q08DE6)|Evalue: 1e-39	39	35957	1	8.2	329	8.01	FLKMAISWRTWLKKTIHCDNSYVRTGLAEFLGTFLLVLLLNGMIITAHMSVRNADGTMAHPLNTAHLAFGGGLAVMVAVLVSGGISGAHLNPAVTTTMLVMGRLSPLKSLVYIFMQYMGAFFAASILYAVYFESILAYDYGERQVLGANGTAGWFATYPQEHISLVTQIFDAILGTGLLVMGIFAIIDPNNMAVPKGQIPLYVGFLISSLIFSFSYNAGAALNPARDLAPRLFLWVIGYGAEAFTARGHLWWLVPVIGPHVGGLLGGVTYQMFIGAHYQSDRKLKPATIMDEDDDTNATYNTITTTTHQKVYNGRRNFDESVPLKTVHA	0.09	0.18
	AS16, 10, 17	EZ763098	contig26932:43:801:1|similar to Chloride intracellular channel exc-4 (Q8WQA4)|Evalue: 2e-50	304	29584	6	34.5	252	6.13	MNGTTETGQPPEVELLIRASTIDGRRKGACLFCQEYFMDLYLLAELKTIALKVTTVDMLKPPADFRSNFEAAHPPILIHDGIIISENDKIERHIMKEIPGGHNLFVKTXESEAKIENLYKKFKVFLLQNNDQSRHSLVTCLKNIDTHLAQKNSRFLTGDSICCFDCELMPRLQNVRIAGKHFCNFDIPMEFTHLWRYMETMYKLPAFIESCPADQDIVHHYKLQMSLKMAKHEELEEPTITKTVPDELSYRN	0.89	1.11
	EES15, 14	EZ763098	contig26932:43:801:1|similar to Chloride intracellular channel exc-4 (Q8WQA4)|Evalue: 2e-50	245	29584	8 (5)	28.6	252	6.13	MNGTTETGQPPEVELLIRASTIDGRRKGACLFCQEYFMDLYLLAELKTIALKVTTVDMLKPPADFRSNFEAAHPPILIHDGIIISENDKIERHIMKEIPGGHNLFVKTXESEAKIENLYKKFKVFLLQNNDQSRHSLVTCLKNIDTHLAQKNSRFLTGDSICCFDCELMPRLQNVRIAGKHFCNFDIPMEFTHLWRYMETMYKLPAFIESCPADQDIVHHYKLQMSLKMAKHEELEEPTITKTVPDELSYRN	0.7	1.08
	TS16, 15	EZ763098	contig26932:43:801:1|similar to Chloride intracellular channel exc-4 (Q8WQA4)|Evalue: 2e-50	286	29584	7 (5)	21.4	252	6.13	MNGTTETGQPPEVELLIRASTIDGRRKGACLFCQEYFMDLYLLAELKTIALKVTTVDMLKPPADFRSNFEAAHPPILIHDGIIISENDKIERHIMKEIPGGHNLFVKTXESEAKIENLYKKFKVFLLQNNDQSRHSLVTCLKNIDTHLAQKNSRFLTGDSICCFDCELMPRLQNVRIAGKHFCNFDIPMEFTHLWRYMETMYKLPAFIESCPADQDIVHHYKLQMSLKMAKHEELEEPTITKTVPDELSYRN	0.7	0.81
	AS15,14-16	EZ762959	contig26155:1:131:3|similar to Voltage-dependent anion-selective channel protein 1 (Q60932)|Evalue: 4e-09	115	4501	8 (1)	42.9	42	8.53	NIGLSYTHSLRPGVKLTLSTLLNGQNLSAGGHRYGFGLEFDV	9.8	20.41
	EES13, 14	EZ762959	contig26155:1:131:3|similar to Voltage-dependent anion-selective channel protein 1 (Q60932)|Evalue: 4e-09	108	4501	6 (1)	42.9	42	8.53	NIGLSYTHSLRPGVKLTLSTLLNGQNLSAGGHRYGFGLEFDV	4.96	7.25
	TS15, 13-15	EZ762959	contig26155:1:131:3|similar to Voltage-dependent anion-selective channel protein 1 (Q60932)|Evalue: 4e-09	102	4501	10 (1)	42.9	42	8.53	NIGLSYTHSLRPGVKLTLSTLLNGQNLSAGGHRYGFGLEFDV	9.8	12.9
	AS15, 13-19	EZ762252	contig23401:118:845:1|similar to Voltage-dependent anion-selective channel protein 2 (P81004)|Evalue: 2e-41	892	26293	43 (16)	76.9	242	9	MVGEVPPAFVDLNKNVKDLFMKNYFFGFGKIDVTTVTAGGVQVRGVGQQDLGEGTKRAFGSLEHKWTYKPYGLTITERWSTDNMLNLETSVENQVVNGLKTTFIAGLSPQTGKRSASILFAYKQPYFHATTDVDLDFAGPVVRSSAVTQYQNFRLGGHVIFDSARSAITRYVLALGMAAGRYVLHGAAINLRDFEMGVWNRVDPRIEVGFQSNFSSTSGAGSLAVGAKYDLDAGASVKAKVD	9.9	22.08
	EES13, 12-15, 17, 18	EZ762252	contig23401:118:845:1|similar to Voltage-dependent anion-selective channel protein 2 (P81004)|Evalue: 2e-41	764	26293	27 (13)	54.5	242	9	MVGEVPPAFVDLNKNVKDLFMKNYFFGFGKIDVTTVTAGGVQVRGVGQQDLGEGTKRAFGSLEHKWTYKPYGLTITERWSTDNMLNLETSVENQVVNGLKTTFIAGLSPQTGKRSASILFAYKQPYFHATTDVDLDFAGPVVRSSAVTQYQNFRLGGHVIFDSARSAITRYVLALGMAAGRYVLHGAAINLRDFEMGVWNRVDPRIEVGFQSNFSSTSGAGSLAVGAKYDLDAGASVKAKVD	5.76	10.78
	TS15, 13-19	EZ762252	contig23401:118:845:1|similar to Voltage-dependent anion-selective channel protein 2 (P81004)|Evalue: 2e-41	1049	26293	51 (16)	76.9	242	9	MVGEVPPAFVDLNKNVKDLFMKNYFFGFGKIDVTTVTAGGVQVRGVGQQDLGEGTKRAFGSLEHKWTYKPYGLTITERWSTDNMLNLETSVENQVVNGLKTTFIAGLSPQTGKRSASILFAYKQPYFHATTDVDLDFAGPVVRSSAVTQYQNFRLGGHVIFDSARSAITRYVLALGMAAGRYVLHGAAINLRDFEMGVWNRVDPRIEVGFQSNFSSTSGAGSLAVGAKYDLDAGASVKAKVD	12.84	18.67
	AS17, 16	EZ762078	contig22692:232:1080:1|similar to Trimeric intracellular cation channel type B (Q7ZVP8)|Evalue: 4e-39	133	31896	4 (3)	14.5	282	8.84	MDPEYFLDFANTVKEMHMFPYFEIAHYILACIHVRDDMGTGVQLISRKHPLACWISCVISIYSGTMLANFLLGEMILAPLKNHDSLALASLVWYLIFYSPFDVIYKLCKTLPVKAVLSVMKEVLRVHKVHDGVHHASKMYPNAFLIHIIIGTVKGAGAGFTKVLERFIRGTWNVTNHEFLQPSFVTKSALAASILFVVEAKTDLITAPHSLVYLGVVIFFVYFKLSSLVLSVHDPFLPFENLFCAVFMGGVWDALSRAIKTSREKAAAKKTEAANGEIDKKK	0.35	0.45
	TS17, 16	EZ762078	contig22692:232:1080:1|similar to Trimeric intracellular cation channel type B (Q7ZVP8)|Evalue: 4e-39	62	31896	2	10.3	282	8.84	MDPEYFLDFANTVKEMHMFPYFEIAHYILACIHVRDDMGTGVQLISRKHPLACWISCVISIYSGTMLANFLLGEMILAPLKNHDSLALASLVWYLIFYSPFDVIYKLCKTLPVKAVLSVMKEVLRVHKVHDGVHHASKMYPNAFLIHIIIGTVKGAGAGFTKVLERFIRGTWNVTNHEFLQPSFVTKSALAASILFVVEAKTDLITAPHSLVYLGVVIFFVYFKLSSLVLSVHDPFLPFENLFCAVFMGGVWDALSRAIKTSREKAAAKKTEAANGEIDKKK	0.22	0.32
Ligand-gated ionic channel family
	EES15	EZ762883	contig25798:1:638:3|similar to Neuronal acetylcholine receptor subunit alpha-4 (Q5IS77)|Evalue: 6e-11	174	23657	3	21.8	211	4.68	LPMGMSLVVIGANPGERSDGDVTISGYIDVKWIDSRLTWNPAEYGGVASILIPTKKIWIPDMVLLNGLHTNKRELLFDTQEAYYNPLIVDKDGGIYLAPLITGTVSCFRNTTGSNAQRYTCPFTFTAYSYGEDVLDLNDLGEPLVQFPFKSSEFVIVDSWITKESFAYASEATRYTLLTYTIVFERTSAVSTTGYNNNNNNQNSNNGYRYS	0.49	0.49
	AS15	EZ762811	contig25495:79:789:1|similar to Acetylcholine receptor subunit alpha-like 2 (P17644)|Evalue: 7e-09	100	26713	3	11.9	236	5.44	MERIVFLLLLVATIKVNAALVATNRTQIPDVLQITRSLLNNYDRRVVPNVNDAPVQVSVSLVLTNAYKSSTGANDISVSGYLDLSWKDARLQFEPPKDSNFSEIYLTANQLWMPNIQLENPIYREKAVPLFDRQDLYYVYIEPTGGVSFSPRIAATVTCTRDSANNTLSCPFAFVPWSHASNRVELKDGGAPMVQYPFASSDFTFVDFNVSTSLFEYTPPYIPFSLVTYTVRFRQI	0.42	0.42
	TS15, 14	EZ762811	contig25495:79:789:1|similar to Acetylcholine receptor subunit alpha-like 2 (P17644)|Evalue: 7e-09	109	26713	5 (3)	11.9	236	5.44	MERIVFLLLLVATIKVNAALVATNRTQIPDVLQITRSLLNNYDRRVVPNVNDAPVQVSVSLVLTNAYKSSTGANDISVSGYLDLSWKDARLQFEPPKDSNFSEIYLTANQLWMPNIQLENPIYREKAVPLFDRQDLYYVYIEPTGGVSFSPRIAATVTCTRDSANNTLSCPFAFVPWSHASNRVELKDGGAPMVQYPFASSDFTFVDFNVSTSLFEYTPPYIPFSLVTYTVRFRQI	0.42	0.54
	AS16, 14-17	EZ761697	contig20272:1:245:1|similar to Neuronal acetylcholine receptor subunit beta-2 (P09484)|Evalue: 3e-05	103	9227	5 (2)	24.7	81	5	EDSHGDMRIRAFLSLNWQDHRLQYTDSAVKKIHVKPSNIWIPDMNVFNWAASVDDVTAFTDSHEAFSAIVMPDGSVFWVPA	0.9	3.08
	EES15, 14	EZ761697	contig20272:1:245:1|similar to Neuronal acetylcholine receptor subunit beta-2 (P09484)|Evalue: 3e-05	93	9227	2	24.7	81	5	EDSHGDMRIRAFLSLNWQDHRLQYTDSAVKKIHVKPSNIWIPDMNVFNWAASVDDVTAFTDSHEAFSAIVMPDGSVFWVPA	0.9	1.28
	TS16, 15-17	EZ761697	contig20272:1:245:1|similar to Neuronal acetylcholine receptor subunit beta-2 (P09484)|Evalue: 3e-05	167	9227	13 (4)	35.8	81	5	EDSHGDMRIRAFLSLNWQDHRLQYTDSAVKKIHVKPSNIWIPDMNVFNWAASVDDVTAFTDSHEAFSAIVMPDGSVFWVPA	5.86	7.14
	AS19, 18	EZ761456	contig19129:1:846:1|similar to Neuronal acetylcholine receptor subunit beta-3 (Q5IS75)|Evalue: 8e-10	58	31759	2	6.7	282	8.69	YFGIRRLVFTMQSVIILAALIAACQAIACKRCNYENIIKTILTGYNPKIPAFGDAYEPIEVQFSLLLNSVDKIGAGTDVVFRGAIKIRWNDPKLRWNPSDYYGIASVSVPATDIWIPDITGVNAIGKNREDLQLFNTNDRYFPIIKSDGSIVYNAHVAITVACTRNITTYSTQTTVTPVYGPLNKDRGYRSRRAYEQTSYARPAYPTYSSYTKATINCPVRFQSWSLLADDLNIVDYGQPLTQFVVKSNTLTLLSSVATTEAINYTGNETPVPVLTYNVVFE	0.22	0.32
	AS15, 14-16	EZ761138	contig17705:184:1038:1|similar to Acetylcholine receptor subunit alpha-L1 (P23414)|Evalue: 4e-23	168	32849	5 (3)	11.6	284	6.66	MXXRNADITTKVLFXEIVFLRFVVSAVSSVTKSIFCKSXPQLRKTMFTTRHILLICIIGSAAANKGPSSYEKVLKNVLSNYDARMPPFDPVNSTITLDVQLNVNSVHELEDTHGDMRIAGFIAMQWLDTRLQWNREEYNNVKDIHVPATEIWVPDIALFNWAASVESQPLFRRRDFEAVIDANGNVYWVPQVAFVVGCTRNKTESGFQQNTCSVKLGSWSYSTEQLQIEDDQRAIVNQHFFSNVWNATSAGVERKELVYPCCKEPYAHLEYTLTFERKDKKGYH	0.47	0.89
	EES14, 13	EZ761138	contig17705:184:1038:1|similar to Acetylcholine receptor subunit alpha-L1 (P23414)|Evalue: 4e-23	360	32849	9 (6)	24.3	284	6.66	MXXRNADITTKVLFXEIVFLRFVVSAVSSVTKSIFCKSXPQLRKTMFTTRHILLICIIGSAAANKGPSSYEKVLKNVLSNYDARMPPFDPVNSTITLDVQLNVNSVHELEDTHGDMRIAGFIAMQWLDTRLQWNREEYNNVKDIHVPATEIWVPDIALFNWAASVESQPLFRRRDFEAVIDANGNVYWVPQVAFVVGCTRNKTESGFQQNTCSVKLGSWSYSTEQLQIEDDQRAIVNQHFFSNVWNATSAGVERKELVYPCCKEPYAHLEYTLTFERKDKKGYH	0.78	1.25
	TS15, 14-16	EZ761138	contig17705:184:1038:1|similar to Acetylcholine receptor subunit alpha-L1 (P23414)|Evalue: 4e-23	321	32849	7 (5)	21.1	284	6.66	MXXRNADITTKVLFXEIVFLRFVVSAVSSVTKSIFCKSXPQLRKTMFTTRHILLICIIGSAAANKGPSSYEKVLKNVLSNYDARMPPFDPVNSTITLDVQLNVNSVHELEDTHGDMRIAGFIAMQWLDTRLQWNREEYNNVKDIHVPATEIWVPDIALFNWAASVESQPLFRRRDFEAVIDANGNVYWVPQVAFVVGCTRNKTESGFQQNTCSVKLGSWSYSTEQLQIEDDQRAIVNQHFFSNVWNATSAGVERKELVYPCCKEPYAHLEYTLTFERKDKKGYH	0.78	0.98
	EES16	EZ760553	contig10452:143:865:2|similar to Neuronal acetylcholine receptor subunit alpha-6 (Q9R0W9)|Evalue: 7e-10	82	26979	2	10.4	240	6.29	MFGHILVALIVGVHASASNKRLAYQNVVETLLYDYNVKVPAIPDTDAPIKVVMTLLINSADKEKATNDILIRGAXKLKWNDPRLRWNPSDFKGVQNIAVPAYSIWIPDISAINSIGRTSQDLQMFNVNDRYAPKINSDGDIEYNTHYALTFSCPRTLTNGAVGTRNATYWCLLMFDSWGMKSEELSLYDSKRALVAFGAFWSSTLTYIRSAVSRPIIDWGNNDGISDVLFYSIIFQETGV	0.26	0.26
	AS16, 16-18	EZ760421	contig09320:131:802:2|similar to Acetylcholine receptor subunit gamma (P02714)|Evalue: 9e-12	146	25691	5 (4)	17	223	6.7	MFFFGAIFFVVGICTEVRCWTEQESVVGRLLAGYDPRVSPHDSNHKLITVNMSLYITGFHDEAEKPSRSGTVTGFTRLTWVDHRLQHTQISELIRIPSKNVWLPDITLFTWAPTANNVKTFDKEEFTTIVYPDGTVLWTPKLLATVSCNPANHSGIQCILGFRSWIYSAEEVDLITSQKSFGNAYQPTIRSLIGGKVERHVDMWMCPLCHFPKATLRYTFDLA	0.84	1.72
	EES16, 15	EZ760421	contig09320:131:802:2|similar to Acetylcholine receptor subunit gamma (P02714)|Evalue: 9e-12	52	25691	1	4.9	223	6.7	MFFFGAIFFVVGICTEVRCWTEQESVVGRLLAGYDPRVSPHDSNHKLITVNMSLYITGFHDEAEKPSRSGTVTGFTRLTWVDHRLQHTQISELIRIPSKNVWLPDITLFTWAPTANNVKTFDKEEFTTIVYPDGTVLWTPKLLATVSCNPANHSGIQCILGFRSWIYSAEEVDLITSQKSFGNAYQPTIRSLIGGKVERHVDMWMCPLCHFPKATLRYTFDLA	0.13	0.26
	TS17, 18	EZ760421	contig09320:131:802:2|similar to Acetylcholine receptor subunit gamma (P02714)|Evalue: 9e-12	396	25691	10 (7)	42.6	223	6.7	MFFFGAIFFVVGICTEVRCWTEQESVVGRLLAGYDPRVSPHDSNHKLITVNMSLYITGFHDEAEKPSRSGTVTGFTRLTWVDHRLQHTQISELIRIPSKNVWLPDITLFTWAPTANNVKTFDKEEFTTIVYPDGTVLWTPKLLATVSCNPANHSGIQCILGFRSWIYSAEEVDLITSQKSFGNAYQPTIRSLIGGKVERHVDMWMCPLCHFPKATLRYTFDLA	1.66	2.1
	EES3, 2	EZ760388	contig09059:1:888:1|similar to Acetylcholine receptor subunit alpha (P02711)|Evalue: 7e-15	63	33040	1	3.4	295	5.29	VGKVKMLKLLVLLALVVTVYSGNYGSGSSGSCVGGQLTEERLAHDLLKRYDKQIAPRRDHSKPIDVDISLVIVNGFNPRPELNEAVSITGFFDMNWNDVRLQWNPADYGGLTEINLDYKNIWIPNIKGTNNVFKDHTTQFFDRDDYYYPTIDYYGNVGFYPRITDTVACTPENSYGNERLVCPYTFEPWSYNSKKVAIRDTGRPLVQFPFKASEFTIADSRVDHNLFTYADGSSYTQVTYTVTFDMVKNSNSGGIQSAYQGWASGQSGGQQNNNGANGGYARALDSNATSAVDTE	0.1	0.2
	EES14, 15	EZ760321	contig08448:42:872:3|similar to Acetylcholine receptor subunit gamma (P05376)|Evalue: 5e-07	134	31331	2	12	276	5.11	MQSFIFALFGIYMVSGDYAPSTSYGSKNVYMSAATRLQEDLLKNYDPTIAPYTADYSPIAIRIAPTLNNAHMASYGKNTVIITGYIGFIFQDDRLRWNPQEYYGLQWFHPSPKKVWLPPISTQITTAVDAESVQPPLINSDNNYPPAVNSTGAVLSAEPFALPISCISKQYYGKERLLCPVILEVFSYQKYEMYMYDGGEPVIKQPFRSNQLTFIGYNVDSNQNQNPNFPGPFSTLIYNFEFEVNGSQSSPQNNQKQQSSYRSLDETDDQTKAEKK	0.22	0.33
	AS17, 16	EZ759360	contig02467:116:940:2|similar to Neuronal acetylcholine receptor subunit eat-2 (Q9U298)|Evalue: 4e-08	141	30666	4	15.3	274	5.12	MLKSLALMLIIACVYGETYSGEGGSGGGCAGGRLPGERLAHDLLKDYDKQIVPRVDRPVEVSFRFLTLFNAFNARTGLDGDVSITGYLDFTWRDVRLQWNPAEYGGQTTVTLDYKHLWFPTVRGVNSLYKGDSAPLWSADDVYRVYVDYNGNVVLQPKFAATVSCTKDYAYGNYRLICPFVFGGWGMHLSDVTFVDAKRDLVTASYSSSDYKIVDYKSETSPYIDLNGVSYPLLTYTLTFEPINRQQHSYGNDGASAPYGRAMDGNSSIVSQDE	0.51	0.87
	EES16, 15	EZ759360	contig02467:116:940:2|similar to Neuronal acetylcholine receptor subunit eat-2 (Q9U298)|Evalue: 4e-08	167	30666	5 (4)	15	274	5.12	MLKSLALMLIIACVYGETYSGEGGSGGGCAGGRLPGERLAHDLLKDYDKQIVPRVDRPVEVSFRFLTLFNAFNARTGLDGDVSITGYLDFTWRDVRLQWNPAEYGGQTTVTLDYKHLWFPTVRGVNSLYKGDSAPLWSADDVYRVYVDYNGNVVLQPKFAATVSCTKDYAYGNYRLICPFVFGGWGMHLSDVTFVDAKRDLVTASYSSSDYKIVDYKSETSPYIDLNGVSYPLLTYTLTFEPINRQQHSYGNDGASAPYGRAMDGNSSIVSQDE	0.51	0.62
	TS17	EZ759360	contig02467:116:940:2|similar to Neuronal acetylcholine receptor subunit eat-2 (Q9U298)|Evalue: 4e-08	184	30666	4	17.5	274	5.12	MLKSLALMLIIACVYGETYSGEGGSGGGCAGGRLPGERLAHDLLKDYDKQIVPRVDRPVEVSFRFLTLFNAFNARTGLDGDVSITGYLDFTWRDVRLQWNPAEYGGQTTVTLDYKHLWFPTVRGVNSLYKGDSAPLWSADDVYRVYVDYNGNVVLQPKFAATVSCTKDYAYGNYRLICPFVFGGWGMHLSDVTFVDAKRDLVTASYSSSDYKIVDYKSETSPYIDLNGVSYPLLTYTLTFEPINRQQHSYGNDGASAPYGRAMDGNSSIVSQDE	0.51	0.51
	AS17, 16	EZ759254	contig01978:53:763:2|similar to Acetylcholine receptor subunit gamma (P05376)|Evalue: 3e-14	43	27174	1	9.7	236	5.57	MLQYTVTLAILIVLSEGRVKPALERLRNDLLDDYEKDVIPLNDTKTPLNVSMTLAVWNARIEKGFEADNDVTINGYIDVRWKDPRLQWNPSDYGGVQVTVLPADRIWIPTIESFGLYKDRRYNLYDFKDHFNPIITADGNVVFPPQIAVTVSCQKSVVMDKEQFMCPVAFMPWSYTSSKIQLDDAKLPIETIKYAAGELRLLRWTVSKKPFQPPGLPEAFPVLTYNIFFERAKPTV	0.12	0.24
	TS16, 17	EZ759254	contig01978:53:763:2|similar to Acetylcholine receptor subunit gamma (P05376)|Evalue: 3e-14	89	27174	2	15.3	236	5.57	MLQYTVTLAILIVLSEGRVKPALERLRNDLLDDYEKDVIPLNDTKTPLNVSMTLAVWNARIEKGFEADNDVTINGYIDVRWKDPRLQWNPSDYGGVQVTVLPADRIWIPTIESFGLYKDRRYNLYDFKDHFNPIITADGNVVFPPQIAVTVSCQKSVVMDKEQFMCPVAFMPWSYTSSKIQLDDAKLPIETIKYAAGELRLLRWTVSKKPFQPPGLPEAFPVLTYNIFFERAKPTV	0.26	0.38
AAA ATPase family.	AS7, 7-13, 15-17	EZ760554	contig10458:1:210:3|similar to Transitional endoplasmic reticulum ATPase (P46462)|Evalue: 4e-27	134	7667	2	44.9	69	8.73	DPAILRPGRLDQLIYIPLPDEGSRTAILKAALRKTPIAKEVNIEYLSKVAHGFSGADLQEICQRACKLA	1.13	5.94
	EES7, 6, 12-14	EZ760554	contig10458:1:210:3|similar to Transitional endoplasmic reticulum ATPase (P46462)|Evalue: 4e-27	191	7667	5 (3)	58	69	8.73	DPAILRPGRLDQLIYIPLPDEGSRTAILKAALRKTPIAKEVNIEYLSKVAHGFSGADLQEICQRACKLA	2.12	3.96
	TS8, 7-9, 11, 12, 15, 16	EZ760554	contig10458:1:210:3|similar to Transitional endoplasmic reticulum ATPase (P46462)|Evalue: 4e-27	169	7667	5 (2)	44.9	69	8.73	DPAILRPGRLDQLIYIPLPDEGSRTAILKAALRKTPIAKEVNIEYLSKVAHGFSGADLQEICQRACKLA	2.12	4.88
	AS8, 14	EZ760574	contig10723:1:109:1|similar to Transitional endoplasmic reticulum ATPase (Q6GL04)|Evalue: 3e-15	38	3951	1	38.9	36	4.95	GKTLLAKAIANECQANFISIKGPELLTMWFGESEAN	0.94	1.88
	AS8, 7-10, 12, 14, 16	EZ761810	contig20935:1:608:1|similar to Transitional endoplasmic reticulum ATPase (P23787)|Evalue: 7e-81	207	23112	5	28.2	202	9	KKNGRTAVFRGDTVLIKGKKRRDTICIALTDDTVSDDKVRMNRVVRRNLRVRLGDVVSVQNCPEVKYAKRVHVLPIDDTIEGLTGNIFEVYLKPYFLEAYRPLRKGDLFMVRGAMRSVEFKVVETDPSPYCIVAPDTVIHAEGDPIKREEEEEAMAEIGYDDIGGCRKQLATIKEMVELPLRHPALFRTIGVKPPRGILLYG	0.97	2.38
	EES7, 9	EZ761810	contig20935:1:608:1|similar to Transitional endoplasmic reticulum ATPase (P23787)|Evalue: 7e-81	171	23112	6 (4)	14.9	202	9	KKNGRTAVFRGDTVLIKGKKRRDTICIALTDDTVSDDKVRMNRVVRRNLRVRLGDVVSVQNCPEVKYAKRVHVLPIDDTIEGLTGNIFEVYLKPYFLEAYRPLRKGDLFMVRGAMRSVEFKVVETDPSPYCIVAPDTVIHAEGDPIKREEEEEAMAEIGYDDIGGCRKQLATIKEMVELPLRHPALFRTIGVKPPRGILLYG	0.72	0.87
	TS8, 7, 10, 12, 13	EZ761810	contig20935:1:608:1|similar to Transitional endoplasmic reticulum ATPase (P23787)|Evalue: 7e-81	241	23112	9 (5)	27.7	202	9	KKNGRTAVFRGDTVLIKGKKRRDTICIALTDDTVSDDKVRMNRVVRRNLRVRLGDVVSVQNCPEVKYAKRVHVLPIDDTIEGLTGNIFEVYLKPYFLEAYRPLRKGDLFMVRGAMRSVEFKVVETDPSPYCIVAPDTVIHAEGDPIKREEEEEAMAEIGYDDIGGCRKQLATIKEMVELPLRHPALFRTIGVKPPRGILLYG	0.97	1.92
	AS7, 8	EZ761828	contig21090:1:317:3|similar to Transitional endoplasmic reticulum ATPase (P23787)|Evalue: 2e-27	206	11906	4	46.2	104	4.73	RETIEMEIRAEKRRQENPDAMIDDSDPVPQVRRDHFEEAMKFARRSVSDNDIRKYEMFAQTLQQSRGFGGNFRFPDSAQTANPAASASGNPAGFQEQPDDDLYN	1.76	2.05
	EES7	EZ761828	contig21090:1:317:3|similar to Transitional endoplasmic reticulum ATPase (P23787)|Evalue: 2e-27	224	11906	6 (4)	38.5	104	4.73	RETIEMEIRAEKRRQENPDAMIDDSDPVPQVRRDHFEEAMKFARRSVSDNDIRKYEMFAQTLQQSRGFGGNFRFPDSAQTANPAASASGNPAGFQEQPDDDLYN	2.56	2.56
	TS8	EZ761828	contig21090:1:317:3|similar to Transitional endoplasmic reticulum ATPase (P23787)|Evalue: 2e-27	227	11906	4	38.5	104	4.73	RETIEMEIRAEKRRQENPDAMIDDSDPVPQVRRDHFEEAMKFARRSVSDNDIRKYEMFAQTLQQSRGFGGNFRFPDSAQTANPAASASGNPAGFQEQPDDDLYN	1.76	1.76
	AS7	EZ760811	contig13332:1:832:3|similar to Transitional endoplasmic reticulum ATPase (P23787)|Evalue: 6e-99	92	31801	2	11.2	276	6.04	LEPVKRELQEIVQYPVEHPEMFAKFGMAPSKGVLFYGPPGCGKTLLAKAIANECQANFISIKGPELLTMWFGESEANVRDVFDKARQAAPCVCFLTSSIQLPRHVEHLLVIQVARPCLESAAYXXDGRCWTKQECLCYWCKQTDQNQIDPALMRPGRLDQLIYIPLPDEPSRLSVLKATLKKTPLASDVDLNQIARITGGFSGADLTEICQRSCKLAIRQSIEYEIKRVREDPNAMMVDADNDPVPYVNKGHFEEAMSYARKSVSEHELRRYEMFA	0.22	0.22
	TS8	EZ760811	contig13332:1:832:3|similar to Transitional endoplasmic reticulum ATPase (P23787)|Evalue: 6e-99	156	31801	3	15.6	276	6.04	LEPVKRELQEIVQYPVEHPEMFAKFGMAPSKGVLFYGPPGCGKTLLAKAIANECQANFISIKGPELLTMWFGESEANVRDVFDKARQAAPCVCFLTSSIQLPRHVEHLLVIQVARPCLESAAYXXDGRCWTKQECLCYWCKQTDQNQIDPALMRPGRLDQLIYIPLPDEPSRLSVLKATLKKTPLASDVDLNQIARITGGFSGADLTEICQRSCKLAIRQSIEYEIKRVREDPNAMMVDADNDPVPYVNKGHFEEAMSYARKSVSEHELRRYEMFA	0.35	0.35
	EES3, 4	EZ762957	contig26145:1:1544:2|similar to Sodium-independent sulfate anion transporter (Q86WA9)|Evalue: 3e-74	57	57254	1	2.5	514	8.56	GHIFLQNYLKSLCSPSEVRSQSATAKMEDARRLTTQQSTVDDCVKIYGAYHSIPPHKLRFCKNETSLDVFTHIFPCISWIRKYRLQFLEMDIIAGLTVGLTMVPQAIAYASIAGLPVEYGLYSSFIGSFIYAFFGTSKDVSIGPTTIMALLTAETIANFDASCRPTVAVLLTFYCGIIQLFMGILHLGFLVDFISIPVSKAFIAAASIVIAFEQVKNLFGIHFQATSFLETVYYTFANIKESNWWDLIVGILCFVTILALSHLNPTHGFVRRTLFEKCLFYFLRVISFAKYAIVICAAGAIEMALLSQNIDAISVNHVNASGLPTVEAPHFHVGNYTGWQTFRKLGSSAFIVPLIGLLETATIAKSFAQEQRYVVHSTQEFRAVGLANFLSSFFSSFPV…	0.06	0.12
	AS5, 4, 8, 12	EZ762952	contig26126:94:1870:1|similar to Monocarboxylate transporter 12 (Q6ZSM3)|Evalue: 1e-30	213	64958	5	11.3	592	8.52	MSDEVVHVIPIAPDGGYGWVIVAASFFCNFIVDGVAYSFALYLMEFLDQFKEPKSKTALTGALLNGVYLLMGPISSALTNAFGFRKVIFTGSIIAAVAFLLSCWMPNVNALIGTYGILGGIGFGLIYSPAIMCVCYYFNKKRAMAVGIAVCGSGVGAFVFAPFVSWLLDYYGWRASFFILSGLILQCCVAGALMRTLEVKVTHETNASNRVITSKDDDEQEGTMLMPLRTSGGNADRPIFVPNIGGANAKAVDSRVHPVTGRSMRNRSESQPLPPDMFGHSTDLNASVKFHSTHEFDVIVRQNGQNIHHIIPRNRRHYTSVPDVRGTTGATRAIVAVPMDRKDVFHHGSLKNIKEFQAQGDMKHFVASQTDISKSNDQKTLLSSGDTGATKPKKSGFLP…	0.28	0.54
	EES11, 4, 12	EZ762952	contig26126:94:1870:1|similar to Monocarboxylate transporter 12 (Q6ZSM3)|Evalue: 1e-30	166	64958	4	9.8	592	8.52	MSDEVVHVIPIAPDGGYGWVIVAASFFCNFIVDGVAYSFALYLMEFLDQFKEPKSKTALTGALLNGVYLLMGPISSALTNAFGFRKVIFTGSIIAAVAFLLSCWMPNVNALIGTYGILGGIGFGLIYSPAIMCVCYYFNKKRAMAVGIAVCGSGVGAFVFAPFVSWLLDYYGWRASFFILSGLILQCCVAGALMRTLEVKVTHETNASNRVITSKDDDEQEGTMLMPLRTSGGNADRPIFVPNIGGANAKAVDSRVHPVTGRSMRNRSESQPLPPDMFGHSTDLNASVKFHSTHEFDVIVRQNGQNIHHIIPRNRRHYTSVPDVRGTTGATRAIVAVPMDRKDVFHHGSLKNIKEFQAQGDMKHFVASQTDISKSNDQKTLLSSGDTGATKPKKSGFLP…	0.22	0.43
	TS12, 4-6, 13	EZ762952	contig26126:94:1870:1|similar to Monocarboxylate transporter 12 (Q6ZSM3)|Evalue: 1e-30	298	64958	7 (6)	13.7	592	8.52	MSDEVVHVIPIAPDGGYGWVIVAASFFCNFIVDGVAYSFALYLMEFLDQFKEPKSKTALTGALLNGVYLLMGPISSALTNAFGFRKVIFTGSIIAAVAFLLSCWMPNVNALIGTYGILGGIGFGLIYSPAIMCVCYYFNKKRAMAVGIAVCGSGVGAFVFAPFVSWLLDYYGWRASFFILSGLILQCCVAGALMRTLEVKVTHETNASNRVITSKDDDEQEGTMLMPLRTSGGNADRPIFVPNIGGANAKAVDSRVHPVTGRSMRNRSESQPLPPDMFGHSTDLNASVKFHSTHEFDVIVRQNGQNIHHIIPRNRRHYTSVPDVRGTTGATRAIVAVPMDRKDVFHHGSLKNIKEFQAQGDMKHFVASQTDISKSNDQKTLLSSGDTGATKPKKSGFLP…	0.34	0.7
	AS16, 17	EZ762950	contig26110:1:1187:3|similar to Magnesium transporter protein 1 (Q9CQY5)|Evalue: 2e-88	123	44748	3	8.9	394	9.45	CXFFAAINRIPLLLSAYLQQYCSDLPFLQGILDVRSVIGFLGEFTHTKMAALDLKSARKSSETLPFSRFFAGVILVLACLLLLWSPLIEAVSSLNDRVAKLNELANQRAVIKFNSDKYKEFIKAPQRNYSVVLMLTALNPSRGCQVCQVAYEEFEVVAHSWRLSPANSDKLFFAMVDFDDGYDVFTSLKINTAPIFMHVPPQGKPKDADTLNIQAVGYDAEVIAKWITERTGLGIRVIRKPNYGGLIAFSLLMVLLGGFLYLRRNSLEFLYNKNMYAWLVVALILFMTSGQMWNHIRGPPFMQRHPQSKQWMYIHGSSQGQYVAETYIVMALNLAVVVGFLLLTEAAKSTNEAHRGRNKVMAIVGIILVAIFFSALKSIFRAKYQGYPYSFLFK	0.24	0.31
	TS16	EZ762950	contig26110:1:1187:3|similar to Magnesium transporter protein 1 (Q9CQY5)|Evalue: 2e-88	99	44748	2	7.6	394	9.45	CXFFAAINRIPLLLSAYLQQYCSDLPFLQGILDVRSVIGFLGEFTHTKMAALDLKSARKSSETLPFSRFFAGVILVLACLLLLWSPLIEAVSSLNDRVAKLNELANQRAVIKFNSDKYKEFIKAPQRNYSVVLMLTALNPSRGCQVCQVAYEEFEVVAHSWRLSPANSDKLFFAMVDFDDGYDVFTSLKINTAPIFMHVPPQGKPKDADTLNIQAVGYDAEVIAKWITERTGLGIRVIRKPNYGGLIAFSLLMVLLGGFLYLRRNSLEFLYNKNMYAWLVVALILFMTSGQMWNHIRGPPFMQRHPQSKQWMYIHGSSQGQYVAETYIVMALNLAVVVGFLLLTEAAKSTNEAHRGRNKVMAIVGIILVAIFFSALKSIFRAKYQGYPYSFLFK	0.15	0.22
	EES4, 5	EZ762648	contig24817:1:584:3|similar to Ammonium transporter 2 (Q9BLG3)|Evalue: 2e-05	69	21076	1	11.3	194	5.07	LQRRWVVVHGCNGILAGLIAISAGAAMMHPWAAALTGAIGALVFLWXXTKVAARLNIDCPLDVISRHLGAGSWGLAAVALLADDGILIDWDTIGFQKLAWQVIGLGIICAWTMALSGIVFGLLRVFNLLRITDYEEYHGQDSTVHGEPAYAEDTIIIADGPKVSHNFEMEPLAQTTMTTESEERTSITRPNVSS	0.16	0.32
	AS12	EZ762562	contig24486:255:2128:3|similar to Sodium- and chloride-dependent glycine transporter 2 (A7Y2X0)|Evalue: 3e-96	76	70201	2	3.8	624	7.81	MAAVREPAIDYPMGDFEKRSESNGSRKGSQASQEGREQWGNKWMFVLSCISLSVGLGNVWRFPYLAYANGGGAFLIPYLLLLFLCGRPMYFMEVAFGQYHAEGPVTVWRKTSPIGRGIGICQMIIQFFTSIYYIIIMSGQCCIFXTTFIAACQNQPVPWEETTFCASEWANKATCGTAQVASNSIPVPIFSNATENAAPRESAAQQYFDRYILWRVTNDKTYDIESTGEINKLLLACLAGSWLIVCLSLLRGVRRPERSLCDVYAPFVVYXDSLIIGATLPNAQDGILYFLVPKFDRLLDITTWRNAAEQMFYSLSVSFGSLVMLGSYNNSNTTXYNDAMIVSVLDTLTSFTAGLAMFSILGYMAGRMNVGVDKVVKSGPGLAFVVFPEAITTMPAPHL…	0.1	0.1
	AS5, 7	EZ761979	contig22182:1:826:2|similar to Zinc transporter SLC39A7 (Q92504)|Evalue: 1e-08	43	30461	1	6.2	275	6.74	HSHAHAHDHAHSHGHTHSHAQPKTGQATKATTSTKSDVPTDFLTKYLSPYIEGSWAYALLSTLGISLAPFLILFLIPIDKNDAHSNPRLKVLLSFASGGLLADAFLHLIPHAIHPHSHHDDHAHSHSHSHNHDGHDHTQFIVVGLWVLAGIIGFFIVEKVIRHMKVGHSHSHSHTHDHSKKTTKTEGKLVATKTKHKKSDNEEATSETSEDETKETHSETHSEKHVKQSKSSQKKGEHKERHAKHSHDETDEAEVTSEDIKLGGYLNLAADVAHN	0.11	0.22
	EES3, 1	EZ761979	contig22182:1:826:2|similar to Zinc transporter SLC39A7 (Q92504)|Evalue: 1e-08	49	30461	1	6.2	275	6.74	HSHAHAHDHAHSHGHTHSHAQPKTGQATKATTSTKSDVPTDFLTKYLSPYIEGSWAYALLSTLGISLAPFLILFLIPIDKNDAHSNPRLKVLLSFASGGLLADAFLHLIPHAIHPHSHHDDHAHSHSHSHNHDGHDHTQFIVVGLWVLAGIIGFFIVEKVIRHMKVGHSHSHSHTHDHSKKTTKTEGKLVATKTKHKKSDNEEATSETSEDETKETHSETHSEKHVKQSKSSQKKGEHKERHAKHSHDETDEAEVTSEDIKLGGYLNLAADVAHN	0.11	0.22
	AS5, 4-6, 10	EZ761882	contig21487:545:1370:2|similar to Excitatory amino acid transporter 3 (P51906)|Evalue: 2e-21	100	31124	2	9.5	275	8.92	MMRPEDEMEKRQFVDKRDTFGEAPVPNDVTYGPQSRWKKMGIKCTAEAWRSFAINNLKVLLLIAAIIVGCILGFSLRSFDIHKDKRKIMYVSFIGDIFLNMLKIVILPLIVSSLISGLSNLESQTSGKIGLRAVTYYLTTTVMAVILGIILVCSIRPGTYGRKDEPQLMAAPNLTLTSTTMSSAFDQTLEDTKTNAKPAEVKKGPGMAGEPMTTPDTFLDLLRNMFPPNLVEACFRQYRTSLEEPKNKSLIQYIRDDNGTILRPDYSTWDIHGKY	0.23	0.8
	TS4, 4-6, 10	EZ761882	contig21487:545:1370:2|similar to Excitatory amino acid transporter 3 (P51906)|Evalue: 2e-21	116	31124	2	14.2	275	8.92	MMRPEDEMEKRQFVDKRDTFGEAPVPNDVTYGPQSRWKKMGIKCTAEAWRSFAINNLKVLLLIAAIIVGCILGFSLRSFDIHKDKRKIMYVSFIGDIFLNMLKIVILPLIVSSLISGLSNLESQTSGKIGLRAVTYYLTTTVMAVILGIILVCSIRPGTYGRKDEPQLMAAPNLTLTSTTMSSAFDQTLEDTKTNAKPAEVKKGPGMAGEPMTTPDTFLDLLRNMFPPNLVEACFRQYRTSLEEPKNKSLIQYIRDDNGTILRPDYSTWDIHGKY	0.23	0.68
	AS6, 4-6	EZ760878	contig14683:115:457:1|similar to Sodium bicarbonate cotransporter 3 (Q8BTY2)|Evalue: 5e-18	108	13026	2	16.7	114	5.36	MTIAPHRRAAIXAEPKMPSPNSKQLAVPTLESPVTPRGIAFDLGDNAEDDLEHHPLFCEMTELKPSKRKTNEFEWRECARWVKFEEDVEEGGNRWSKPFVASLSLHSLLELPTA	0.6	1.12
	TS6, 4	EZ760878	contig14683:115:457:1|similar to Sodium bicarbonate cotransporter 3 (Q8BTY2)|Evalue: 5e-18	75	13026	2 (1)	9.6	114	5.36	MTIAPHRRAAIXAEPKMPSPNSKQLAVPTLESPVTPRGIAFDLGDNAEDDLEHHPLFCEMTELKPSKRKTNEFEWRECARWVKFEEDVEEGGNRWSKPFVASLSLHSLLELPTA	0.26	0.52
	AS4, 5, 10	EZ760549	contig10433:1:1019:3|similar to Excitatory amino acid transporter 1 (P24942)|Evalue: 5e-82	102	36749	2	14.8	338	6.07	ENINIMGLVVFSILFGLTISRCGEKGLPLRLFFESLNEVTMDIVGTVMWAAPIGVTFLVAGQILKVDDFGAMLAQLAMYFVTVVTGLFIHAFILLPLIYFFFTRQNPFSFMGGALQAFATGFATSSSSATLPITIRCLEERNGVDPRVSRFVLPIGATINMDGTALYEAVAALFIAQTLAVPMDFGKIIAVSITATAAAIGAAGVPQAGLVTMVMVLDAVGLPAHHITIILAIDWFLDRIRTTVNILGDVLGCGIVQHMSKGFLSKMDEEKRLKRRASRIQRLHEDEEDSFDNLLADQAHGHLQLLPTVQPHPGQQLSAQKITITTVSTANKAESRLP	0.19	0.37
	TS4, 5	EZ760549	contig10433:1:1019:3|similar to Excitatory amino acid transporter 1 (P24942)|Evalue: 5e-82	78	36749	1	3.3	338	6.07	ENINIMGLVVFSILFGLTISRCGEKGLPLRLFFESLNEVTMDIVGTVMWAAPIGVTFLVAGQILKVDDFGAMLAQLAMYFVTVVTGLFIHAFILLPLIYFFFTRQNPFSFMGGALQAFATGFATSSSSATLPITIRCLEERNGVDPRVSRFVLPIGATINMDGTALYEAVAALFIAQTLAVPMDFGKIIAVSITATAAAIGAAGVPQAGLVTMVMVLDAVGLPAHHITIILAIDWFLDRIRTTVNILGDVLGCGIVQHMSKGFLSKMDEEKRLKRRASRIQRLHEDEEDSFDNLLADQAHGHLQLLPTVQPHPGQQLSAQKITITTVSTANKAESRLP	0.09	0.18
	EES4, 2-4, 9	EZ760471	contig09658:1:461:2|similar to Ammonium transporter 1 member 2 (Q6K9G1)|Evalue: 2e-24	63	16154	2 (1)	7.2	153	8.11	ATITATIVSGALVERIHSIGYMIATFFLTGFTYPIVSHWVWAYNGWLRHGDGVVGLLDYAGSGVIHVVGGSCALIATLILGPRVGRFDSSGNVIAIRGHNLPLTVLGFCLTFIGLLAVIGGSLIHINDTDRLARAMVNAVIASAAGGWTLTVF	0.21	0.84
	AS5, 4	EZ760385	contig09050:1:1724:3|similar to Canalicular multispecific organic anion transporter 1 (Q92887)|Evalue: 0.0	105	65228	2	6.1	573	7.29	HLSWPAVVGIVAFYILFNSLQIGTNLWLGEWAEDSRHPDRFNSTLWRDYRLGIYGGDGHCTRHIRVFFLFDLLAYXFNSVRRFMHLGMLKSLMRAKMEFFDTTPLGRIINRFSKDVDTIDTMLPMNFRMWLNCVFSVLGTIVVICIATPVFSAAIVPLAILYYFIQRFFIATSRQLKRLESVSRSPIYSHFQESVTGTSVIVATRQTDRFITENERRVDLNNTAYYPNIVSQRWLAIRLEFIGNCITFFASLFAVIGRDQEWGVDPKDVGLSISYALTVTQTLNWMVRMTSELETNVVSVERIKEYSEVPSEAAWIVPDARPDKSWPAQGIFEFNDYQVRYRPGLELVLKGVSCKIASQEKIGIVGRTGAGKSSLTLALFRLIEASGGSILLDGINIAN…	0.1	0.2
	TS4	EZ760385	contig09050:1:1724:3|similar to Canalicular multispecific organic anion transporter 1 (Q92887)|Evalue: 0.0	66	65228	2	4.5	573	7.29	HLSWPAVVGIVAFYILFNSLQIGTNLWLGEWAEDSRHPDRFNSTLWRDYRLGIYGGDGHCTRHIRVFFLFDLLAYXFNSVRRFMHLGMLKSLMRAKMEFFDTTPLGRIINRFSKDVDTIDTMLPMNFRMWLNCVFSVLGTIVVICIATPVFSAAIVPLAILYYFIQRFFIATSRQLKRLESVSRSPIYSHFQESVTGTSVIVATRQTDRFITENERRVDLNNTAYYPNIVSQRWLAIRLEFIGNCITFFASLFAVIGRDQEWGVDPKDVGLSISYALTVTQTLNWMVRMTSELETNVVSVERIKEYSEVPSEAAWIVPDARPDKSWPAQGIFEFNDYQVRYRPGLELVLKGVSCKIASQEKIGIVGRTGAGKSSLTLALFRLIEASGGSILLDGINIAN…	0.1	0.1
	AS14	EZ760198	contig07527:162:1012:3|similar to Mitochondrial folate transporter/carrier (Q8BMG8)|Evalue: 1e-53	142	31421	3	11.3	283	9.66	MSQPKGKTPVELPVPTPQLVEEVKPMPNMYSVRRLYEYLVERSKAEHLLAGISGGVVATLMLHPLDLMKVRFSVNDGNSPHAKTVNLGLQQAFVQTYRENGVKGLYAGVVPNCLGAATSWGIYFLIYNISKEWIARHRPTLSDGSLKPVHHMVAAANAGFFSLVFTNPIFVVKTRLNLQLQGQTAKAAVPESRNYRGMMDCFRKTYQFEGVKGLYRGFTPGLLGISHGSFQLMAYEFLKKEMNVLKGADISAKLSTPEYLASSAGAKIFAGLLTYPYYQVIRA	0.35	0.35
	EES13	EZ760198	contig07527:162:1012:3|similar to Mitochondrial folate transporter/carrier (Q8BMG8)|Evalue: 1e-53	95	31421	2	8.1	283	9.66	MSQPKGKTPVELPVPTPQLVEEVKPMPNMYSVRRLYEYLVERSKAEHLLAGISGGVVATLMLHPLDLMKVRFSVNDGNSPHAKTVNLGLQQAFVQTYRENGVKGLYAGVVPNCLGAATSWGIYFLIYNISKEWIARHRPTLSDGSLKPVHHMVAAANAGFFSLVFTNPIFVVKTRLNLQLQGQTAKAAVPESRNYRGMMDCFRKTYQFEGVKGLYRGFTPGLLGISHGSFQLMAYEFLKKEMNVLKGADISAKLSTPEYLASSAGAKIFAGLLTYPYYQVIRA	0.22	0.22
	TS14	EZ760198	contig07527:162:1012:3|similar to Mitochondrial folate transporter/carrier (Q8BMG8)|Evalue: 1e-53	211	31421	5	21.6	283	9.66	MSQPKGKTPVELPVPTPQLVEEVKPMPNMYSVRRLYEYLVERSKAEHLLAGISGGVVATLMLHPLDLMKVRFSVNDGNSPHAKTVNLGLQQAFVQTYRENGVKGLYAGVVPNCLGAATSWGIYFLIYNISKEWIARHRPTLSDGSLKPVHHMVAAANAGFFSLVFTNPIFVVKTRLNLQLQGQTAKAAVPESRNYRGMMDCFRKTYQFEGVKGLYRGFTPGLLGISHGSFQLMAYEFLKKEMNVLKGADISAKLSTPEYLASSAGAKIFAGLLTYPYYQVIRA	0.5	0.5
	AS9	EZ759675	contig04135:1:1511:3|similar to ABC transporter F family member 1 (Q9FJH6)|Evalue: 0.0	106	57332	3	7	502	5.63	KNVELEERELDINAANRASTGVLTSDPRSKDLKIYNFSVTLYGKELLVDTNLELNSGNRYGLIGLNGSGKSTLMSVLGRREVDVPDSMDIYHLHREMAPIDKTAIECVVEVDKERMKLEKEAEELSHSTDDESHEKLMEIYERLDELGAETAEARASSILHGLGFTKAMMATKVKDFSGGWRMRIALARALFVRPTILLLDGPTHHLDLEACVWLEEELKTYKRILIVISHSQDFLNSVCTNIIHLHNAQLKYYGGNYDAFIRTRAEQMENQLKKYNWEQDQIAHMKDYIARFGHGSAKLARQAQSKEKTLAKMVAGGLTEEIGKDKLLEFYFPDPGTIPPPVIMVQQVSFRYTDDKPLIYKNLEFGIDLDSRIALVGPNGAGKSTLLKLLSGDNIPTE…	0.18	0.18
	TS10, 9	EZ759675	contig04135:1:1511:3|similar to ABC transporter F family member 1 (Q9FJH6)|Evalue: 0.0	165	57332	3	8.4	502	5.63	KNVELEERELDINAANRASTGVLTSDPRSKDLKIYNFSVTLYGKELLVDTNLELNSGNRYGLIGLNGSGKSTLMSVLGRREVDVPDSMDIYHLHREMAPIDKTAIECVVEVDKERMKLEKEAEELSHSTDDESHEKLMEIYERLDELGAETAEARASSILHGLGFTKAMMATKVKDFSGGWRMRIALARALFVRPTILLLDGPTHHLDLEACVWLEEELKTYKRILIVISHSQDFLNSVCTNIIHLHNAQLKYYGGNYDAFIRTRAEQMENQLKKYNWEQDQIAHMKDYIARFGHGSAKLARQAQSKEKTLAKMVAGGLTEEIGKDKLLEFYFPDPGTIPPPVIMVQQVSFRYTDDKPLIYKNLEFGIDLDSRIALVGPNGAGKSTLLKLLSGDNIPTE…	0.18	0.24
	AS6, 4-11	EZ759449	contig02938:228:1706:3|similar to Solute carrier family 2, facilitated glucose transporter member 1 (P27674)|Evalue: 5e-108	63	54533	2	4.1	492	8.84	MARVTGSLIFAAMAAAFGSSFLFGYNIGVINAPQQVVGKWIRDVQCSRYGNVSDPTMAEKRGWCDPIPEGVNQFDWLPQLNTLWSIICAMFCVGGLIGALATGFLVTRFGRKGTMLINTATGILGAALLAFPYLANSWEMLIAGRLVIGINAGLNSGVPPMYMTEIAPLELRGAIATFAQLFVTIAILVSQILGLPQILGNEWGWPILFGLSIVPVIYQLLTLPFCPESPRYLYTQKKDETGAQKALVYLRRSTDVRDDMDDIRREYEKVKDEPTVTIRDLFANKLYRTCLIICLMMMLSQQLSGINAVMFYSTKIFLDAGLGENSVYATIGVGAVNVLMTVVSMFLIEKAGRKLLHLIGLSGAAVVLVLLTISMALFENGVAWLKYVSLISVIMYVIF…	0.12	0.54
	EES5, 1, 3-5, 7, 13	EZ759449	contig02938:228:1706:3|similar to Solute carrier family 2, facilitated glucose transporter member 1 (P27674)|Evalue: 5e-108	68	54533	2	4.1	492	8.84	MARVTGSLIFAAMAAAFGSSFLFGYNIGVINAPQQVVGKWIRDVQCSRYGNVSDPTMAEKRGWCDPIPEGVNQFDWLPQLNTLWSIICAMFCVGGLIGALATGFLVTRFGRKGTMLINTATGILGAALLAFPYLANSWEMLIAGRLVIGINAGLNSGVPPMYMTEIAPLELRGAIATFAQLFVTIAILVSQILGLPQILGNEWGWPILFGLSIVPVIYQLLTLPFCPESPRYLYTQKKDETGAQKALVYLRRSTDVRDDMDDIRREYEKVKDEPTVTIRDLFANKLYRTCLIICLMMMLSQQLSGINAVMFYSTKIFLDAGLGENSVYATIGVGAVNVLMTVVSMFLIEKAGRKLLHLIGLSGAAVVLVLLTISMALFENGVAWLKYVSLISVIMYVIF…	0.12	0.42
	TS5, 4-8	EZ759449	contig02938:228:1706:3|similar to Solute carrier family 2, facilitated glucose transporter member 1 (P27674)|Evalue: 5e-108	76	54533	3 (2)	4.1	492	8.84	MARVTGSLIFAAMAAAFGSSFLFGYNIGVINAPQQVVGKWIRDVQCSRYGNVSDPTMAEKRGWCDPIPEGVNQFDWLPQLNTLWSIICAMFCVGGLIGALATGFLVTRFGRKGTMLINTATGILGAALLAFPYLANSWEMLIAGRLVIGINAGLNSGVPPMYMTEIAPLELRGAIATFAQLFVTIAILVSQILGLPQILGNEWGWPILFGLSIVPVIYQLLTLPFCPESPRYLYTQKKDETGAQKALVYLRRSTDVRDDMDDIRREYEKVKDEPTVTIRDLFANKLYRTCLIICLMMMLSQQLSGINAVMFYSTKIFLDAGLGENSVYATIGVGAVNVLMTVVSMFLIEKAGRKLLHLIGLSGAAVVLVLLTISMALFENGVAWLKYVSLISVIMYVIF…	0.12	0.42
	AS10, 4	EZ759211	contig01729:1:437:3|similar to Sodium- and chloride-dependent creatine transporter 1 (P48029)|Evalue: 1e-28	51	17249	1	6.2	144	9	FFAFWECVVIGWFYTGEKLYDNIALMIGYRISPWMKFGWKYTGPLYTAFIFIFWCSRYEPLTYNRIYVYPVWAQAIGWVLALSSIGCVPGYAVYRMLTTEGTIRERWRYLTSPHITERPEAQEYREKRALLQPNGATMALRDTT	0.2	0.4
	AS6, 4-10, 13, 14	EZ758982	contig00457:317:1870:2|similar to Ammonium transporter Rh type B (Q7T070)|Evalue: 9e-101	152	57965	4 (3)	5.8	517	6.05	MPTESSRAGGLKFVLILGLFQVAFIVLFGFFVEYDTDAMPAPARPMPEIHRTHFANGSRIEQIVEQPAPETKYAVRDYYPMFQDVHVMMFIGFGFLMTFLRKYGYSSIGINFLLAAFVIQWATIMQGFLHLHHGKIQINLTKLITADFASAVILITFGCVLGKLSPLQYIIMAFLEIVFFAVNEWIGLSVFKVLDVGGSIFVHTFGAYFGLAMSRVLYRWEYGYPDFNLLKFTTHQNDLFSMIGTIFLWLYWPSFNSALASGDQQHRAIINTYFALASCCIFTFLCSFMFKHRRFSMELVQNATLAGGVAIGATADLIVYPYGAMLIGGAAGILSCVGFHIISXNMEHKLKVHDTCGVNNLHGMPGIFAALISSIVIATASESLYGASYYTVFPMAVPE…	0.18	0.84
	TS5, 4, 7, 8	EZ758982	contig00457:317:1870:2|similar to Ammonium transporter Rh type B (Q7T070)|Evalue: 9e-101	67	57965	2	4.8	517	6.05	MPTESSRAGGLKFVLILGLFQVAFIVLFGFFVEYDTDAMPAPARPMPEIHRTHFANGSRIEQIVEQPAPETKYAVRDYYPMFQDVHVMMFIGFGFLMTFLRKYGYSSIGINFLLAAFVIQWATIMQGFLHLHHGKIQINLTKLITADFASAVILITFGCVLGKLSPLQYIIMAFLEIVFFAVNEWIGLSVFKVLDVGGSIFVHTFGAYFGLAMSRVLYRWEYGYPDFNLLKFTTHQNDLFSMIGTIFLWLYWPSFNSALASGDQQHRAIINTYFALASCCIFTFLCSFMFKHRRFSMELVQNATLAGGVAIGATADLIVYPYGAMLIGGAAGILSCVGFHIISXNMEHKLKVHDTCGVNNLHGMPGIFAALISSIVIATASESLYGASYYTVFPMAVPE…	0.12	1.47
Transmembrane proteins
	AS16, 15	EZ759690	contig04250:1:941:3|similar to Thioredoxin-related transmembrane protein 1 (Q0Z7W6)|Evalue: 4e-44	147	35426	4 (3)	12.5	312	5.38	TEGSLATIVTMNGIMWSSVALRALSCLVIACLFLGCESKVISLDEDNWRQILNGEWMVEFFAPWCPACRDFDPEYRRFSEWDKDLNIKVASVDVSAHPGLSGRFLITALPTIYHVKNGAFRRYTQNRNKEAMQNFIEDKAWERLSPVDNWSHPDTVHMGFVGSFYKLSMALKNFHSWMTESQGYPNWLTYLIFGIATITLGGIIGILLVFIMDMFSRVRSSPESQPDHGRLKNVADQRRPRSRSASASSASVSGRSVESGEELEVSGAEGEEDVEHMSDGQSVSSSISDVDQLEDNEMDASTKVRQRKVRRE	0.43	0.86
	EES15, 14	EZ759690	contig04250:1:941:3|similar to Thioredoxin-related transmembrane protein 1 (Q0Z7W6)|Evalue: 4e-44	299	35426	6	22.8	312	5.38	TEGSLATIVTMNGIMWSSVALRALSCLVIACLFLGCESKVISLDEDNWRQILNGEWMVEFFAPWCPACRDFDPEYRRFSEWDKDLNIKVASVDVSAHPGLSGRFLITALPTIYHVKNGAFRRYTQNRNKEAMQNFIEDKAWERLSPVDNWSHPDTVHMGFVGSFYKLSMALKNFHSWMTESQGYPNWLTYLIFGIATITLGGIIGILLVFIMDMFSRVRSSPESQPDHGRLKNVADQRRPRSRSASASSASVSGRSVESGEELEVSGAEGEEDVEHMSDGQSVSSSISDVDQLEDNEMDASTKVRQRKVRRE	0.71	1.02
	TS16, 15	EZ759690	contig04250:1:941:3|similar to Thioredoxin-related transmembrane protein 1 (Q0Z7W6)|Evalue: 4e-44	261	35426	5	19.6	312	5.38	TEGSLATIVTMNGIMWSSVALRALSCLVIACLFLGCESKVISLDEDNWRQILNGEWMVEFFAPWCPACRDFDPEYRRFSEWDKDLNIKVASVDVSAHPGLSGRFLITALPTIYHVKNGAFRRYTQNRNKEAMQNFIEDKAWERLSPVDNWSHPDTVHMGFVGSFYKLSMALKNFHSWMTESQGYPNWLTYLIFGIATITLGGIIGILLVFIMDMFSRVRSSPESQPDHGRLKNVADQRRPRSRSASASSASVSGRSVESGEELEVSGAEGEEDVEHMSDGQSVSSSISDVDQLEDNEMDASTKVRQRKVRRE	0.56	0.76
	AS9, 15	EZ760967	contig16561:1:401:1|similar to Leucine-rich repeat transmembrane neuronal protein 3 (Q8BZ81)|Evalue: 2e-10	79	15328	2	10.5	133	6.57	SIRAPLEIDAFKNYTSRIYRHGTALPVLLFFQLSDTLRVLNLTHNGIRSIAENSFRNLSRLTHLHLDHNQIENVYSGLFSFMTNLRELTFSHNRITEISQRMGLQLSRLEVLDLSNNPLTNMVNDESANIPDQ	0.49	0.49
	TS9	EZ760967	contig16561:1:401:1|similar to Leucine-rich repeat transmembrane neuronal protein 3 (Q8BZ81)|Evalue: 2e-10	63	15328	2	10.5	133	6.57	SIRAPLEIDAFKNYTSRIYRHGTALPVLLFFQLSDTLRVLNLTHNGIRSIAENSFRNLSRLTHLHLDHNQIENVYSGLFSFMTNLRELTFSHNRITEISQRMGLQLSRLEVLDLSNNPLTNMVNDESANIPDQ	0.49	0.49
	AS17	EZ762864	contig25726:1:590:3|similar to Transmembrane protein 111 (Q7SXW4)|Evalue: 1e-62	105	22502	3	13.3	196	10.23	RGHHYTMTELLLDPNIRTWIFVPIVVVTFFIGIIRHYASILMSSPKKADLQQVKDTQLLLRSRALRENGKFLPRNSFLMRKHFFNDKETGVLKVAQARPAPTTNPMQDPNTIQEMLKGNLLNVLPMIAIGGWINWIFSGFVTTKVPFPLTWRFKDMLQRGINLPSLDPAWVSSASWYFLNVFGLRQIYSLVLGADN	0.52	0.52
	AS18, 17	EZ762587	contig24567:2523:3216:2|similar to Transmembrane protein 33 homolog (Q9XWV0)|Evalue: 3e-30	163	26583	4	17	230	9.71	EYLKVHRVDIVMNVVRFMVLIFSMSYLLNITGKDGFYKALLSMAAASALRLFQRTSEYQGSNSYSQVFLQLLGEDSCHYLMYCILFLTGSPVTFVLVPICIFALLHSTTYLTKVSRELGFARNVMTTVERLLANEQRRLLLTAALCEIIMLPISLLMIMTAKLTFLAPFLYYRFLQLRYGSRRNPYSKQVFREIRLALERFAHKDQCPAAISGLILKAIALASRLAPQQQ	0.61	0.74
	EES1, 16	EZ762587	contig24567:2523:3216:2|similar to Transmembrane protein 33 homolog (Q9XWV0)|Evalue: 3e-30	79	26583	2	10	230	9.71	EYLKVHRVDIVMNVVRFMVLIFSMSYLLNITGKDGFYKALLSMAAASALRLFQRTSEYQGSNSYSQVFLQLLGEDSCHYLMYCILFLTGSPVTFVLVPICIFALLHSTTYLTKVSRELGFARNVMTTVERLLANEQRRLLLTAALCEIIMLPISLLMIMTAKLTFLAPFLYYRFLQLRYGSRRNPYSKQVFREIRLALERFAHKDQCPAAISGLILKAIALASRLAPQQQ	0.27	0.4
	AS4, 4-6, 17	EZ762403	contig23936:1:1227:1|similar to Transmembrane protein C2orf18 (Q8N357)|Evalue: 2e-97	151	46043	3	9.1	408	6.92	DCTYIGLRFYSTEARYTVDTXPQQKSSKMAWTTFQLIIAFVMLVTGSLNTLIAKFTDKEEAVGRDNGPKRPFEHPFLQASVMFLGELMCLFVFFIKRMYDKRRVGPDDVPLLDATPTVKAPAWVFLPPALCDLTATSIMYVGLNYTYASSFQMLRGAVIIFTGLLSVAFLQKNIRASQWIGMFLVISGLSVVGVSDIMTTDQSAADRNRIITGDLLIIMAQIVTACQMVYEEKYLAKYNVPALQAVGLEGLFGFITLSLLLIPMQYIYVGEQSQNPYHTLEDSLDAFAQMSNNYLIVIGLCGTILSIAFFNYAGITVTKEINATTRMVLDSMRTLIIWAVSLSIPGWQRFNFWQILGFGLLIIGMAVYNQILTRETPVIIRRRVTRIFRKDDGQSDVLV…	0.23	0.52
	EES4, 3-5, 7, 14, 15	EZ762403	contig23936:1:1227:1|similar to Transmembrane protein C2orf18 (Q8N357)|Evalue: 2e-97	157	46043	4 (3)	9.1	408	6.92	DCTYIGLRFYSTEARYTVDTXPQQKSSKMAWTTFQLIIAFVMLVTGSLNTLIAKFTDKEEAVGRDNGPKRPFEHPFLQASVMFLGELMCLFVFFIKRMYDKRRVGPDDVPLLDATPTVKAPAWVFLPPALCDLTATSIMYVGLNYTYASSFQMLRGAVIIFTGLLSVAFLQKNIRASQWIGMFLVISGLSVVGVSDIMTTDQSAADRNRIITGDLLIIMAQIVTACQMVYEEKYLAKYNVPALQAVGLEGLFGFITLSLLLIPMQYIYVGEQSQNPYHTLEDSLDAFAQMSNNYLIVIGLCGTILSIAFFNYAGITVTKEINATTRMVLDSMRTLIIWAVSLSIPGWQRFNFWQILGFGLLIIGMAVYNQILTRETPVIIRRRVTRIFRKDDGQSDVLV…	0.23	0.66
	TS4, 5	EZ762403	contig23936:1:1227:1|similar to Transmembrane protein C2orf18 (Q8N357)|Evalue: 2e-97	125	46043	4 (3)	9.1	408	6.92	DCTYIGLRFYSTEARYTVDTXPQQKSSKMAWTTFQLIIAFVMLVTGSLNTLIAKFTDKEEAVGRDNGPKRPFEHPFLQASVMFLGELMCLFVFFIKRMYDKRRVGPDDVPLLDATPTVKAPAWVFLPPALCDLTATSIMYVGLNYTYASSFQMLRGAVIIFTGLLSVAFLQKNIRASQWIGMFLVISGLSVVGVSDIMTTDQSAADRNRIITGDLLIIMAQIVTACQMVYEEKYLAKYNVPALQAVGLEGLFGFITLSLLLIPMQYIYVGEQSQNPYHTLEDSLDAFAQMSNNYLIVIGLCGTILSIAFFNYAGITVTKEINATTRMVLDSMRTLIIWAVSLSIPGWQRFNFWQILGFGLLIIGMAVYNQILTRETPVIIRRRVTRIFRKDDGQSDVLV…	0.23	0.3
	AS5, 4	EZ762091	contig22739:1:578:3|similar to Transmembrane protein 120A (Q8C1E7)|Evalue: 3e-51	87	23062	1	6.8	192	9.46	EKLYSAQSKCLKDLQHHKYRVSQISDALKKVKPKSDEESEKMSGLKQAISRRRSELADITETLPRKNNLYLRVILGNINLSLLSKAERFRYKDEYEHFKLVVTMICGVFSFVNLFLLHYRFLDAAFHFLLVWYYCTLTIREGILRINGSKIQGWWVAHHYITTFLTGVFVTWPDTPVYHAFRNQFFYFCIYL	0.15	0.3
	EES21, 20	EZ761818	contig20983:1:280:1|similar to Transmembrane protein 50A (Q9CXL1)|Evalue: 7e-30	50	10522	1	12.9	93	6.17	FFLGWWFIIDVAVMHPSSSEFFHANHVCGVVSTLAFIMINAVSNSHVRGESYSEGWLGQRGARVWLFIGFLMGFSALIAATWILFQSYVVSHD	0.33	0.66
	AS5, 4-6	EZ761621	contig19938:1:470:2|similar to Transmembrane protein 86A (Q3MHQ7)|Evalue: 9e-09	44	17709	1	5.8	156	10.14	YFCGPRILKKTLKKMDSNKRPRPKMRKTGPNFMTDKRLWLLPFALTIVLYALYQRPHNESSFAGVIIKGAPIVALALFVGLLEYVEAKRTHCSRWVFTGLVFSLLGDVFLQLKASGYFIHGMAAFALAQLTYIKAAGLEFTHRLTAVYLLIPAVLI	0.19	0.57
	AS5, 4-7, 9, 15, 16, 19	EZ761286	contig18428:1:607:2|similar to Transmembrane protein 97 (Q8VD00)|Evalue: 5e-10	130	22945	4 (3)	13.9	201	9.52	LHSIFFKVSFQIGSKAAHKMASRLLDLIYFVVFAAQLVFAIGLDGQLLFDRKQYPEPARKAFDDYVKNWKDPFFAAPPTWFKALIGFEFAFQLPLAFICLFGALFGARWYRVPATAWAASTVAAMTPILAHLMYEVSDKVLPEKERSSLMGIYGGFFGVAVVMLLDMLLLRKSTTVEVDVVEKKQIRFDKRTEVKDEKKKK	0.5	1.55
	EES19, 18	EZ761286	contig18428:1:607:2|similar to Transmembrane protein 97 (Q8VD00)|Evalue: 5e-10	245	22945	11 (6)	36.3	201	9.52	LHSIFFKVSFQIGSKAAHKMASRLLDLIYFVVFAAQLVFAIGLDGQLLFDRKQYPEPARKAFDDYVKNWKDPFFAAPPTWFKALIGFEFAFQLPLAFICLFGALFGARWYRVPATAWAASTVAAMTPILAHLMYEVSDKVLPEKERSSLMGIYGGFFGVAVVMLLDMLLLRKSTTVEVDVVEKKQIRFDKRTEVKDEKKKK	1.26	1.57
	TS5, 4-8, 10, 15-17, 19	EZ761286	contig18428:1:607:2|similar to Transmembrane protein 97 (Q8VD00)|Evalue: 5e-10	103	22945	4 (2)	10	201	9.52	LHSIFFKVSFQIGSKAAHKMASRLLDLIYFVVFAAQLVFAIGLDGQLLFDRKQYPEPARKAFDDYVKNWKDPFFAAPPTWFKALIGFEFAFQLPLAFICLFGALFGARWYRVPATAWAASTVAAMTPILAHLMYEVSDKVLPEKERSSLMGIYGGFFGVAVVMLLDMLLLRKSTTVEVDVVEKKQIRFDKRTEVKDEKKKK	0.31	1.98
	AS5, 16	EZ761259	contig18285:1:536:3|similar to Transmembrane protein 86B (Q3T0W0)|Evalue: 6e-08	135	19868	2	16.4	177	9.6	AYLFRHLKEDVVFAGAVLVYLLLIVGMAWRTIARFQKVRRSNLFEQKTLWALVGAVGAISFMISDSTLAVSMFAFDFPNANMIVMVTYYFAQLCLTLSAMHEDPNIRASDRAPSRFAKQKALPKRKVTPFMAEAPVLMKGSSSLDDVIEDDEAVLEPILTKKKVSTAQRPKESTKSK	0.37	0.54
	TS16, 4	EZ761259	contig18285:1:536:3|similar to Transmembrane protein 86B (Q3T0W0)|Evalue: 6e-08	53	19868	1	7.3	177	9.6	AYLFRHLKEDVVFAGAVLVYLLLIVGMAWRTIARFQKVRRSNLFEQKTLWALVGAVGAISFMISDSTLAVSMFAFDFPNANMIVMVTYYFAQLCLTLSAMHEDPNIRASDRAPSRFAKQKALPKRKVTPFMAEAPVLMKGSSSLDDVIEDDEAVLEPILTKKKVSTAQRPKESTKSK	0.17	0.34
	AS4, 5, 25	EZ759583	contig03615:86:301:2|similar to UPF0197 transmembrane protein C11orf10 homolog (Q32P84)|Evalue: 2e-10	51	8060	1	12.5	72	8.04	MEVQPSKFVDATGYARFKGPIDATIIPVLSYLLLGAGFFFMAYFFVYEVTSTRSTRDLKKELMVATLAAVFL	0.43	1.29
	EES22, 21	EZ759583	contig03615:86:301:2|similar to UPF0197 transmembrane protein C11orf10 homolog (Q32P84)|Evalue: 2e-10	55	8060	1	12.5	72	8.04	MEVQPSKFVDATGYARFKGPIDATIIPVLSYLLLGAGFFFMAYFFVYEVTSTRSTRDLKKELMVATLAAVFL	0.43	0.86
	TS5, 7, 8	EZ759583	contig03615:86:301:2|similar to UPF0197 transmembrane protein C11orf10 homolog (Q32P84)|Evalue: 2e-10	63	8060	1	12.5	72	8.04	MEVQPSKFVDATGYARFKGPIDATIIPVLSYLLLGAGFFFMAYFFVYEVTSTRSTRDLKKELMVATLAAVFL	0.43	1.29
	EES13	EZ759307	contig02190:1:482:3|similar to Transmembrane protein 194A (O14524)|Evalue: 1e-13	174	18801	3	27	159	5.98	LRSYAPFRWFFRVKPRKLLSSEEYEREATVETQRALEELRSYCSSPECNSWDIVGKLKNPSRFASFIHNGSHISLEESRMYEEEPFIESDFDSLRMTDDDSSRNRSRNNRNSFVPDNSRWSFNNSPNSHSSSYSAAHLSGHNSFFSHRNGHYESMDYDS	0.64	0.64
	AS8, 4, 5, 9, 12	EZ759259	contig02001:99:2246:3|similar to Transmembrane protein 214 (A4FV45)|Evalue: 1e-24	586	82912	13 (12)	24.3	715	9.41	MGDSDLDVNDTKGWQKVEEKKKKAAATQGKSNKDSKTNQASPTKHGVVQKPKRPMNLPHKKMVAAPNLQTDSESYSEDEQPKGKRPEKSVSKSGDEERVKSDRKMPTLEELVPKLKVDKLKDIVEQSKTRFPNSDLWLKDVAFYVNHALSQVPMKSPSYEGENFGYPLNLASDKFLTFFXDKQLLVLPDDVYRQFVSWCVYELAAEHAKKQTTHGLRFMVQYLLSRQPQLLNDRIVSEVSQEVIEQSSRKGDMLTRMWAVSQVGLSSLELGFKNWYTVAFPLLNSKNYTSFVMNYLDSLFLHHKKENLKNLDMHTHMKVFDAFLGXASSGLTIANRQHLAELYYRFSAVSFEMQLAEHAKEYFAQFLTRLRPDATATSKKAACDNMIQCIEADPSVLEF…	0.53	0.77
	EES8, 1-4, 7	EZ759259	contig02001:99:2246:3|similar to Transmembrane protein 214 (A4FV45)|Evalue: 1e-24	409	82912	8 (7)	15.2	715	9.41	MGDSDLDVNDTKGWQKVEEKKKKAAATQGKSNKDSKTNQASPTKHGVVQKPKRPMNLPHKKMVAAPNLQTDSESYSEDEQPKGKRPEKSVSKSGDEERVKSDRKMPTLEELVPKLKVDKLKDIVEQSKTRFPNSDLWLKDVAFYVNHALSQVPMKSPSYEGENFGYPLNLASDKFLTFFXDKQLLVLPDDVYRQFVSWCVYELAAEHAKKQTTHGLRFMVQYLLSRQPQLLNDRIVSEVSQEVIEQSSRKGDMLTRMWAVSQVGLSSLELGFKNWYTVAFPLLNSKNYTSFVMNYLDSLFLHHKKENLKNLDMHTHMKVFDAFLGXASSGLTIANRQHLAELYYRFSAVSFEMQLAEHAKEYFAQFLTRLRPDATATSKKAACDNMIQCIEADPSVLEF…	0.36	0.94
	TS8, 4, 6, 9	EZ759259	contig02001:99:2246:3|similar to Transmembrane protein 214 (A4FV45)|Evalue: 1e-24	336	82912	9 (6)	11	715	9.41	MGDSDLDVNDTKGWQKVEEKKKKAAATQGKSNKDSKTNQASPTKHGVVQKPKRPMNLPHKKMVAAPNLQTDSESYSEDEQPKGKRPEKSVSKSGDEERVKSDRKMPTLEELVPKLKVDKLKDIVEQSKTRFPNSDLWLKDVAFYVNHALSQVPMKSPSYEGENFGYPLNLASDKFLTFFXDKQLLVLPDDVYRQFVSWCVYELAAEHAKKQTTHGLRFMVQYLLSRQPQLLNDRIVSEVSQEVIEQSSRKGDMLTRMWAVSQVGLSSLELGFKNWYTVAFPLLNSKNYTSFVMNYLDSLFLHHKKENLKNLDMHTHMKVFDAFLGXASSGLTIANRQHLAELYYRFSAVSFEMQLAEHAKEYFAQFLTRLRPDATATSKKAACDNMIQCIEADPSVLEF…	0.26	0.42
	AS5, 4, 7-10, 12-14, 17, 18	EZ759165	contig01477:1:451:2|similar to Transmembrane protein 69 (Q3KQJ0)|Evalue: 2e-10	44	16555	1	4.7	149	9.03	VVPFMYAPLAFMITGDYCSATAFTQLLYSAIVMSFIGGIRWGHTLAPSGSIPNMKNLGIRHAAVGALLFAWADVAFLPQWFATLCMAIAYVELTAVNMKFQGYPNWFKGLNVLLTAVAVVSLSLTLLCRVCITEKEVVVTTRKPFLGFF	0.2	2.2
	EES5, 3	EZ759165	contig01477:1:451:2|similar to Transmembrane protein 69 (Q3KQJ0)|Evalue: 2e-10	37	16555	1	4.7	149	9.03	VVPFMYAPLAFMITGDYCSATAFTQLLYSAIVMSFIGGIRWGHTLAPSGSIPNMKNLGIRHAAVGALLFAWADVAFLPQWFATLCMAIAYVELTAVNMKFQGYPNWFKGLNVLLTAVAVVSLSLTLLCRVCITEKEVVVTTRKPFLGFF	0.2	0.2
	TS4, 4-6, 8-10, 16-18	EZ759165	contig01477:1:451:2|similar to Transmembrane protein 69 (Q3KQJ0)|Evalue: 2e-10	56	16555	2	9.4	149	9.03	VVPFMYAPLAFMITGDYCSATAFTQLLYSAIVMSFIGGIRWGHTLAPSGSIPNMKNLGIRHAAVGALLFAWADVAFLPQWFATLCMAIAYVELTAVNMKFQGYPNWFKGLNVLLTAVAVVSLSLTLLCRVCITEKEVVVTTRKPFLGFF	0.45	2.05
nonaspanin (TM9SF) family.	AS5, 4	EZ760521	contig10176:168:613:3|similar to Transmembrane 9 superfamily member 2 (P58021)|Evalue: 2e-38	66	17187	2	12.2	148	6.88	MALGSLAIIAGSSVAVAIYLPGLAPVTYCKKDSIQGCQDIIKVFVNRLNSEHSTIPYEYHYFDFCTVDDELASSPVENLGQLVFGDRMRPSPYKVSFLDTKRCENLCQRKYNLKDAQDQEKLRKLRSGISLNYQHHWIVDNVPATWCY	0.43	0.63
	AS11, 4-7	EZ762850	contig25673:1:1525:2|similar to Transmembrane 9 superfamily member 2 (Q5R8Y6)|Evalue: 0.0	76	58433	2	4.5	507	8.09	TTLGDTYCSPGFPMGCYYSRDGDKPHQCPTPVDRDAANSKDTHYIYNHMEIKISYHNDETKDASSSEFAGRIVRVEVIPHSVDHASAGGCESSRFLALPPETGYATDTFAINYTYSVEFISEEKIRWSSRWDYILTTDRQSKIQWFSILNSLVIVLFLSGMVAMILLRTLRRDIARYNQLDNADDAQEEFGWKLVHGDVFRAPHKAMLLSVFVGSGVQVLIMSMITLVFACLGFLSPANRGALMTCALFLYVCLGTPAGYVSSRLYKMMGGERWKVNVLLTAFLCPGLVFSIFFILNIVLWAQNSSAAVPFTTLLALLGLWFGISVPLTFVGAYFGFRRRSIENPVRVNQIPRQVPYQSFYTRPVPGILMGGILPFGCIFIQLFFILNSIWAHQTYYMF…	0.12	0.48
	EES3, 4	EZ762850	contig25673:1:1525:2|similar to Transmembrane 9 superfamily member 2 (Q5R8Y6)|Evalue: 0.0	78	58433	2	3.7	507	8.09	TTLGDTYCSPGFPMGCYYSRDGDKPHQCPTPVDRDAANSKDTHYIYNHMEIKISYHNDETKDASSSEFAGRIVRVEVIPHSVDHASAGGCESSRFLALPPETGYATDTFAINYTYSVEFISEEKIRWSSRWDYILTTDRQSKIQWFSILNSLVIVLFLSGMVAMILLRTLRRDIARYNQLDNADDAQEEFGWKLVHGDVFRAPHKAMLLSVFVGSGVQVLIMSMITLVFACLGFLSPANRGALMTCALFLYVCLGTPAGYVSSRLYKMMGGERWKVNVLLTAFLCPGLVFSIFFILNIVLWAQNSSAAVPFTTLLALLGLWFGISVPLTFVGAYFGFRRRSIENPVRVNQIPRQVPYQSFYTRPVPGILMGGILPFGCIFIQLFFILNSIWAHQTYYMF…	0.12	0.24
	TS4, 5	EZ762850	contig25673:1:1525:2|similar to Transmembrane 9 superfamily member 2 (Q5R8Y6)|Evalue: 0.0	71	58433	2	3.7	507	8.09	TTLGDTYCSPGFPMGCYYSRDGDKPHQCPTPVDRDAANSKDTHYIYNHMEIKISYHNDETKDASSSEFAGRIVRVEVIPHSVDHASAGGCESSRFLALPPETGYATDTFAINYTYSVEFISEEKIRWSSRWDYILTTDRQSKIQWFSILNSLVIVLFLSGMVAMILLRTLRRDIARYNQLDNADDAQEEFGWKLVHGDVFRAPHKAMLLSVFVGSGVQVLIMSMITLVFACLGFLSPANRGALMTCALFLYVCLGTPAGYVSSRLYKMMGGERWKVNVLLTAFLCPGLVFSIFFILNIVLWAQNSSAAVPFTTLLALLGLWFGISVPLTFVGAYFGFRRRSIENPVRVNQIPRQVPYQSFYTRPVPGILMGGILPFGCIFIQLFFILNSIWAHQTYYMF…	0.12	0.18
	AS12, 4, 5	EZ762178	contig23087:273:2027:3|similar to Transmembrane 9 superfamily member 3 (Q9ET30)|Evalue: 0.0	35	67905	1	1.9	584	6.54	MAKMHRCFFPLLLIFVQTLRTLADEHSHVYEDGEEIILWMNTVGPHANRQETYGFYSLPFCRGSRTDISHYHETMAEALQGVELEPSGLDIKFKRDVKKSEYCDISLNSESLASFLYAVKNHYWYQAYIDDLPIWGTIGEYDQSSSTFYIYTHRKIDIGYNGAQIVDVNVTNEAREEVKENQKLKFTYEVHFKPSSIVYHDRFDKYLDPAFFQHRIHWFSIFNSFMMVIFLVGLVFMILMRTLRKDYARYSKEDDMDDLEKDLGDEYGWKQVHGDVFRSPSKITLFSSLIGCGYQLAVVVICVILLAIFGDLYTERSSLLGAAIFVYAATSPVNGYFGGSLYARYGGKYWIRQMIISSFFFPTIVCGMAFLINFIAISYHASRAIPFLTMLAVAAICLF…	0.05	0.15
	EES3, 4	EZ762178	contig23087:273:2027:3|similar to Transmembrane 9 superfamily member 3 (Q9ET30)|Evalue: 0.0	40	67905	1	1.9	584	6.54	MAKMHRCFFPLLLIFVQTLRTLADEHSHVYEDGEEIILWMNTVGPHANRQETYGFYSLPFCRGSRTDISHYHETMAEALQGVELEPSGLDIKFKRDVKKSEYCDISLNSESLASFLYAVKNHYWYQAYIDDLPIWGTIGEYDQSSSTFYIYTHRKIDIGYNGAQIVDVNVTNEAREEVKENQKLKFTYEVHFKPSSIVYHDRFDKYLDPAFFQHRIHWFSIFNSFMMVIFLVGLVFMILMRTLRKDYARYSKEDDMDDLEKDLGDEYGWKQVHGDVFRSPSKITLFSSLIGCGYQLAVVVICVILLAIFGDLYTERSSLLGAAIFVYAATSPVNGYFGGSLYARYGGKYWIRQMIISSFFFPTIVCGMAFLINFIAISYHASRAIPFLTMLAVAAICLF…	0.05	0.1
	TS5, 4	EZ762178	contig23087:273:2027:3|similar to Transmembrane 9 superfamily member 3 (Q9ET30)|Evalue: 0.0	29	67905	1	1.9	584	6.54	MAKMHRCFFPLLLIFVQTLRTLADEHSHVYEDGEEIILWMNTVGPHANRQETYGFYSLPFCRGSRTDISHYHETMAEALQGVELEPSGLDIKFKRDVKKSEYCDISLNSESLASFLYAVKNHYWYQAYIDDLPIWGTIGEYDQSSSTFYIYTHRKIDIGYNGAQIVDVNVTNEAREEVKENQKLKFTYEVHFKPSSIVYHDRFDKYLDPAFFQHRIHWFSIFNSFMMVIFLVGLVFMILMRTLRKDYARYSKEDDMDDLEKDLGDEYGWKQVHGDVFRSPSKITLFSSLIGCGYQLAVVVICVILLAIFGDLYTERSSLLGAAIFVYAATSPVNGYFGGSLYARYGGKYWIRQMIISSFFFPTIVCGMAFLINFIAISYHASRAIPFLTMLAVAAICLF…	0.05	0.1
	AS9, 4, 5, 8	EZ760404	contig09206:225:1888:3|similar to Transmembrane 9 superfamily member 4 (Q8BH24)|Evalue: 2e-179	34	63595	1	1.6	554	7.51	MSLLQRHLWLFCALLNFAQAFYVPGVAPVEFSDGDSVEVRAVKMTSEKTQLPYTYYSLPFCKPKGELEYKSENFGEILRGDRIVKTPFEIKMNENVECRICSDRESEGKTKQISSEESALIAEHIRDNYYVHLLVDNLPCATKFTMVDTNEAQYEPGYRLGYVNTDGTVVFNNHLTFLLKYHKVAENQNVRRVVGCEVEAKSVSVGDIVQKEGSNSCSIPEVKNPLVISEKDDAKNKLLFTYSVKWEPSEVRWASRWDVYLKHADVQIHWFSIINSVVVVLFLAGILSIIIVRTLRRDIANYNRDDTEGDEAIEETGWKLVHGDVFRSPNKSKLFVTFIGTGVQLLCMAFVTIFLAMLGMLSPASRGALMQAGVLLYVFSGLIGGYNAGRLYKTLKGVE…	0.05	0.2
	TS4, 5	EZ760404	contig09206:225:1888:3|similar to Transmembrane 9 superfamily member 4 (Q8BH24)|Evalue: 2e-179	70	63595	2	2.5	554	7.51	MSLLQRHLWLFCALLNFAQAFYVPGVAPVEFSDGDSVEVRAVKMTSEKTQLPYTYYSLPFCKPKGELEYKSENFGEILRGDRIVKTPFEIKMNENVECRICSDRESEGKTKQISSEESALIAEHIRDNYYVHLLVDNLPCATKFTMVDTNEAQYEPGYRLGYVNTDGTVVFNNHLTFLLKYHKVAENQNVRRVVGCEVEAKSVSVGDIVQKEGSNSCSIPEVKNPLVISEKDDAKNKLLFTYSVKWEPSEVRWASRWDVYLKHADVQIHWFSIINSVVVVLFLAGILSIIIVRTLRRDIANYNRDDTEGDEAIEETGWKLVHGDVFRSPNKSKLFVTFIGTGVQLLCMAFVTIFLAMLGMLSPASRGALMQAGVLLYVFSGLIGGYNAGRLYKTLKGVE…	0.11	0.16
EMP24/GP25L family.	AS19, 18	EZ759732	contig04478:168:863:3|similar to Transmembrane emp24 domain-containing protein 1 (Q28BQ6)|Evalue: 3e-28	116	26542	3	11.7	231	5.57	MLQVSLLTAVTASLLLSFLHSVFGELSFVVNAGRTECFFHYANVGEGFEIDFQVLNGGELDIGFWCNDPLGTTLKRDMKVSEQVHHVEAKVAGDFMFCFDNTFSTFATKHVWFDIYAEKEEDHEAEFKKLGSGTQEDVXNEDRELHDKLSKVHMNMEKVIKTQHTVRNYELVDRMIVESNFERVNSYSIFQTIVMAAVGIVQVVMVRSLFEERSRIGKVLRGKSSHSKSYL	0.43	0.86
	EES17, 16	EZ759732	contig04478:168:863:3|similar to Transmembrane emp24 domain-containing protein 1 (Q28BQ6)|Evalue: 3e-28	82	26542	2	8.7	231	5.57	MLQVSLLTAVTASLLLSFLHSVFGELSFVVNAGRTECFFHYANVGEGFEIDFQVLNGGELDIGFWCNDPLGTTLKRDMKVSEQVHHVEAKVAGDFMFCFDNTFSTFATKHVWFDIYAEKEEDHEAEFKKLGSGTQEDVXNEDRELHDKLSKVHMNMEKVIKTQHTVRNYELVDRMIVESNFERVNSYSIFQTIVMAAVGIVQVVMVRSLFEERSRIGKVLRGKSSHSKSYL	0.27	0.4
	TS18	EZ759732	contig04478:168:863:3|similar to Transmembrane emp24 domain-containing protein 1 (Q28BQ6)|Evalue: 3e-28	94	26542	2	8.7	231	5.57	MLQVSLLTAVTASLLLSFLHSVFGELSFVVNAGRTECFFHYANVGEGFEIDFQVLNGGELDIGFWCNDPLGTTLKRDMKVSEQVHHVEAKVAGDFMFCFDNTFSTFATKHVWFDIYAEKEEDHEAEFKKLGSGTQEDVXNEDRELHDKLSKVHMNMEKVIKTQHTVRNYELVDRMIVESNFERVNSYSIFQTIVMAAVGIVQVVMVRSLFEERSRIGKVLRGKSSHSKSYL	0.27	0.27
	AS19, 4, 5, 13	EZ761200	contig18001:1:471:1|similar to Transmembrane emp24 domain-containing protein 2 (P49020)|Evalue: 1e-52	269	17682	6	39.7	156	4.92	ITIEPDSQECFFDRVKTGTKMGLTFEVVEGGFMDIDVQISGPDAKVVYSGDRESNGKYTFAAYSEGPYTYCFSNKMSTLTTKTIMFSMDIGEATEPHTPSPDHTNQEHEKLDNMIRDLAAALTTVKHEQDYMNVRARIHATINESTNSRVVLWAFF	1.86	2.43
	EES18, 17	EZ761200	contig18001:1:471:1|similar to Transmembrane emp24 domain-containing protein 2 (P49020)|Evalue: 1e-52	214	17682	6 (4)	29.5	156	4.92	ITIEPDSQECFFDRVKTGTKMGLTFEVVEGGFMDIDVQISGPDAKVVYSGDRESNGKYTFAAYSEGPYTYCFSNKMSTLTTKTIMFSMDIGEATEPHTPSPDHTNQEHEKLDNMIRDLAAALTTVKHEQDYMNVRARIHATINESTNSRVVLWAFF	1.01	1.43
	TS19	EZ761200	contig18001:1:471:1|similar to Transmembrane emp24 domain-containing protein 2 (P49020)|Evalue: 1e-52	246	17682	5	35.3	156	4.92	ITIEPDSQECFFDRVKTGTKMGLTFEVVEGGFMDIDVQISGPDAKVVYSGDRESNGKYTFAAYSEGPYTYCFSNKMSTLTTKTIMFSMDIGEATEPHTPSPDHTNQEHEKLDNMIRDLAAALTTVKHEQDYMNVRARIHATINESTNSRVVLWAFF	1.01	1.01
	AS19, 17-19	EZ762357	contig23762:106:762:1|similar to Transmembrane emp24 domain-containing protein 7 (Q9Y3B3)|Evalue: 2e-53	209	25631	6 (3)	17.8	219	4.98	MDSSTKTLICYFICFFILSAKESAAVELTFELQDRDNQCFFEDIKKGDQSTVEFQVVTGGHYDIDCTILDPNSKELYKGVKKEYDSFQWTADVEGTFQVCFSNEFSTFSHKLVYVDWFVGTEHPMKAPFRGRDTAMTQLETSADIIQNNLRETEDSLTHRRLREAQDRKFAEDLNETVIHWSIGQSLFMVLVGFGQVYILRSFFTDKRAPALNTRLLLF	0.63	0.89
	EES17, 16	EZ762357	contig23762:106:762:1|similar to Transmembrane emp24 domain-containing protein 7 (Q9Y3B3)|Evalue: 2e-53	204	25631	7 (3)	17.8	219	4.98	MDSSTKTLICYFICFFILSAKESAAVELTFELQDRDNQCFFEDIKKGDQSTVEFQVVTGGHYDIDCTILDPNSKELYKGVKKEYDSFQWTADVEGTFQVCFSNEFSTFSHKLVYVDWFVGTEHPMKAPFRGRDTAMTQLETSADIIQNNLRETEDSLTHRRLREAQDRKFAEDLNETVIHWSIGQSLFMVLVGFGQVYILRSFFTDKRAPALNTRLLLF	0.63	0.76
	TS19, 18	EZ762357	contig23762:106:762:1|similar to Transmembrane emp24 domain-containing protein 7 (Q9Y3B3)|Evalue: 2e-53	213	25631	8 (4)	17.8	219	4.98	MDSSTKTLICYFICFFILSAKESAAVELTFELQDRDNQCFFEDIKKGDQSTVEFQVVTGGHYDIDCTILDPNSKELYKGVKKEYDSFQWTADVEGTFQVCFSNEFSTFSHKLVYVDWFVGTEHPMKAPFRGRDTAMTQLETSADIIQNNLRETEDSLTHRRLREAQDRKFAEDLNETVIHWSIGQSLFMVLVGFGQVYILRSFFTDKRAPALNTRLLLF	0.84	0.97
	AS18, 17	EZ761049	contig17283:1:716:2|similar to Transmembrane emp24 domain-containing protein 9 (Q9BVK6)|Evalue: 2e-48	194	27301	5 (4)	17.6	238	6.88	PDRNGRGLAKRCDVDILRIFATFXXEFFVKNCVSFHISFRKTSGWTKATIDSGCSYRESSVFDCERGPFYSHLQNTILLDICLLDSFVSKMFLSRLALFSSLVIAVKGLYFHLAETENKCFMEEIPDETMVVGKYKVEFMDPGSNRWVHVPPGMGMHVEVKDPEQKAFLSRTYGAEGKFTFTSHTPGEHTVCLSTNSSRWFGGGSLRVHLDLSIGEHANDYAELAGKEKLSELQLRVR	0.59	0.71
	EES16	EZ761049	contig17283:1:716:2|similar to Transmembrane emp24 domain-containing protein 9 (Q9BVK6)|Evalue: 2e-48	118	27301	5 (3)	14.3	238	6.88	PDRNGRGLAKRCDVDILRIFATFXXEFFVKNCVSFHISFRKTSGWTKATIDSGCSYRESSVFDCERGPFYSHLQNTILLDICLLDSFVSKMFLSRLALFSSLVIAVKGLYFHLAETENKCFMEEIPDETMVVGKYKVEFMDPGSNRWVHVPPGMGMHVEVKDPEQKAFLSRTYGAEGKFTFTSHTPGEHTVCLSTNSSRWFGGGSLRVHLDLSIGEHANDYAELAGKEKLSELQLRVR	0.41	0.41
[truncated: 5,691 more rows]

## Sheet: all domain sweep
	Identified proteins that could not be annotated by homology search against Swissprot and NCBInr databases were analyzed further using DomainSweep program.
[truncated: 750 more rows]
