# Supplementary material for: Comparative proteome analysis of Milnesium tardigradum in early embryonic state versus adults in active and anhydrobiotic state
Source: PLoS One. 2012 Sep 27;7(9):e45682. doi: 10.1371/journal.pone.0045682 (PMC3459984; doi:10.1371/journal.pone.0045682)
Supplement: Table S5 — Summary of proteins phosphorylated at serine and threonine residues. (XLSX) [file pone.0045682.s005.xlsx]

## Sheet: Phosphoproteins
	Table S5: Summary of proteins phosphorylated at serine and threonine residues.
	We have identified 13 phosphoproteins in EES only, 11 phosphoproteins in AS only and 11 phosphoproteins in TS only.
	Further 7 phosphoproteins could be identified in both AS and TS, 2 phosphoproteins in both EES and AS and 2 phosphoproteins in both EES and TS. 3 phosphoproteins are identified in all three states.
	slice no.	contig	prot_desc	prot_score	prot_mass	prot_matches	prot_cover	prot_pi	pep_score	pep_seq
	Early embryonic state
	EES3	contig28208:1:214:2	contig28208:1:214:2|No Annotation	67	8234	2	24.3	8.2	31.72	ADSPQSIR
	EES4	contig28208:1:214:2	contig28208:1:214:2|No Annotation	29	8234	1	11.4	8.2	28.64	ADSPQSIR
	EES5	contig24202:107:1017:2	contig24202:107:1017:2|similar to Apolipoprotein B-100 (P04114)|Evalue: 3e-18	1015	33965	80	66.7	6.71	31.15	EGMPQTPDFATIDQELEYIAQNPTNR
	EES6	contig05682:1:2558:3	contig05682:1:2558:3|similar to Tumor suppressor p53-binding protein 1 (Q12888)|Evalue: 6e-22	387	94591	12	13.6	6.02	53.59	FVENLSENEDETER
	EES7	contig16592:1:1150:2	contig16592:1:1150:2|similar to Probable splicing factor ECU05_1440 (Q8SRU2)|Evalue: 5e-04	204	42897	5	12.6	5.91	42.41	GVNSPTLSSQPLK
	EES7	contig28208:1:214:2	contig28208:1:214:2|No Annotation	27	8234	1	11.4	8.2	27.19	ADSPQSIR
	EES8	contig28208:1:214:2	contig28208:1:214:2|No Annotation	38	8234	1	11.4	8.2	38.19	ADSPQSIR
	EES9	contig23619:142:1410:1	contig23619:142:1410:1|similar to Alpha-2-macroglobulin receptor-associated protein (Q99068)|Evalue: 2e-12	1176	49117	34	46	8.19	61.3	FNSVSTASEESELLK
	EES9	contig08235:860:1596:2	contig08235:860:1596:2|No Annotation	876	27856	26	59.6	5.65	36.2	FGASSDEESDSFR
	EES9								42.68	FGASSDEESDSFR
	EES9	contig26157:1:1731:1	contig26157:1:1731:1|similar to Serine/threonine-protein phosphatase 4 regulatory subunit 2-A (Q5M7D6)|Evalue: 2e-18	457	62649	12	22.4	4.76	67.99	YESEKPISSLSPVPNVDNYTFDEYESR
	EES11	contig16973:1:1246:2	contig16973:1:1246:2|similar to Proliferation-associated protein 2G4 (P50580)|Evalue: 4e-96	688	45899	21	31.2	7.96	63.83	DQHASDEEQENQETVR
	EES11								61.96	LTTDEKDQHASDEEQENQETVR
	EES11	contig26126:94:1870:1	contig26126:94:1870:1|similar to Monocarboxylate transporter 12 (Q6ZSM3)|Evalue: 1e-30	171	64958	5	9.8	8.52	33.95	HFVASQTDISK
	EES11	contig24743:1:340:2	contig24743:1:340:2|No Annotation	32	12146	1	10.7	4.64	32.49	IDRTSPTETDAK
	EES12	contig24113:114:1337:3	contig24113:114:1337:3|similar to Ribonucleoside-diphosphate reductase subunit M2 (P31350)|Evalue: 4e-142	342	46546	7	20.9	5.69	38.24	SHSLEPHSTVIASPTK
	EES13	contig24704:133:1211:1	contig24704:133:1211:1|similar to PWWP domain-containing protein 2B (Q6NUJ5)|Evalue: 2e-19	27	39489	1	1.9	9.47	27.23	SVIHTKK
	EES14	contig08235:860:1596:2	contig08235:860:1596:2|No Annotation	873	27856	28	61.6	5.65	36.89	FGASSDEESDSFR
	EES14								26.29	FGASSDEESDSFR
	EES15	contig08235:860:1596:2	contig08235:860:1596:2|No Annotation	998	27856	28	64.9	5.65	58.29	FGASSDEESDSFR
	EES15								65.5	FGASSDEESDSFR
	EES15								31.07	FGASSDEESDSFR
	EES15	contig22674:1:121:3	contig22674:1:121:3|similar to Elongation factor 1-beta (P12262)|Evalue: 1e-05	85	4401	3	82.1	4.17	37.99	AAESKDDDIDLFGSDDEDDEEAEK
	EES16	contig08235:860:1596:2	contig08235:860:1596:2|No Annotation	825	27856	28	60.4	5.65	31.1	FGASSDEESDSFR
	EES16								25.88	FGASSDEESDSFR
	EES16								53.82	FGASSDEESDSFR
	EES16								57.74	FGASSDEESDSFR
	EES16	contig26550:1:288:1	contig26550:1:288:1|similar to B-cell receptor-associated protein 31 (Q5R8H3)|Evalue: 4e-06	235	10665	7	33.7	8.18	40.7	SVLTGDTSETVRDSPNPALQQQLQK
	EES16	contig00384:1:500:3	contig00384:1:500:3|similar to Histone H2A (Q5KMT5)|Evalue: 5e-26	59	18630	2	8.5	9.24	29.21	REDETNENTSPEVR
	EES16	contig17174:1:222:1	contig17174:1:222:1|No Annotation	29	8034	1	9.6	10.45	29.02	GGAIKSR
	EES17	contig08235:860:1596:2	contig08235:860:1596:2|No Annotation	816	27856	21	58.4	5.65	49.09	FGASSDEESDSFR
	EES17								45.49	FGASSDEESDSFR
	EES17	contig00384:1:500:3	contig00384:1:500:3|similar to Histone H2A (Q5KMT5)|Evalue: 5e-26	181	18630	5	36.4	9.24	53.24	REDETNENTSPEVR
	EES17	contig25413:56:228:2	contig25413:56:228:2|similar to Rho GDP-dissociation inhibitor 1 (Q5XI73)|Evalue: 7e-05	84	6198	2	47.4	4.65	53.45	SSGDAKEEVNSDEETNYK
	EES17	contig05823:1:1097:3	contig05823:1:1097:3|similar to Proactivator polypeptide (P26779)|Evalue: 7e-24	69	41882	2	4.9	5.93	27.03	SQISGCLK
	EES20	contig18662:1:441:1	contig18662:1:441:1|similar to Vacuolar ATPase assembly integral membrane protein VMA21 (B8JLV7)|Evalue: 3e-06	228	16100	5	26	9.61	32.19	EQQLLDSNTSGSASPVKK
	EES20	contig24748:1:444:3	contig24748:1:444:3|similar to Signal peptidase complex subunit 1 (Q5RF96)|Evalue: 3e-06	120	17092	6	16.3	8.64	63.46	ETLDTTDTSPVATPK
	EES20								56.55	ETLDTTDTSPVATPK
	EES21	contig24748:1:444:3	contig24748:1:444:3|similar to Signal peptidase complex subunit 1 (Q5RF96)|Evalue: 3e-06	81	17092	2	10.2	8.64	49.51	ETLDTTDTSPVATPK
	EES22	contig17174:1:222:1	contig17174:1:222:1|No Annotation	29	8034	1	13.7	10.45	29.31	VAAEKGGSIK
	Tun state
	TS4	contig08235:860:1596:2	contig08235:860:1596:2|No Annotation	690	27856	21	53.5	5.65	67.44	FGASSDEESDSFR
	TS4								39.38	FGASSDEESDSFR
	TS5	contig08235:860:1596:2	contig08235:860:1596:2|No Annotation	728	27856	24	53.5	5.65	29.39	FGASSDEESDSFR
	TS5								31.62	FGASSDEESDSFR
	TS5	contig19615:1:999:3	contig19615:1:999:3|similar to Myosin light chain kinase, smooth muscle (Q6PDN3)|Evalue: 3e-29	483	36187	11	28	4.81	40.85	RASISAPSTR
	TS6	contig08235:860:1596:2	contig08235:860:1596:2|No Annotation	918	27856	34	61.6	5.65	49.44	FGASSDEESDSFR
	TS6								53.91	FGASSDEESDSFR
	TS6	contig19615:1:999:3	contig19615:1:999:3|similar to Myosin light chain kinase, smooth muscle (Q6PDN3)|Evalue: 3e-29	255	36187	5	15.1	4.81	32.17	RASISAPSTR
	TS6	contig25827:1:240:1	contig25827:1:240:1|No Annotation	39	8278	1	16.5	10.29	38.72	KVEDHASPTVTTR
	TS6	contig28339:79:887:1	contig28339:79:887:1|similar to Nuclear receptor subfamily 1 group I member 2 (O75469)|Evalue: 2e-16	29	30641	1	2.6	8.73	28.99	ATTALEK
	TS6	contig13089:164:1052:2	contig13089:164:1052:2|similar to General negative regulator of transcription subunit 4 (P34909)|Evalue: 8e-51	29	34269	1	2.4	7.91	28.53	TKIVVNK
	TS7	contig02295:455:757:2	contig02295:455:757:2|No Annotation	325	11684	36	48.5	6.82	51.9	GQPGKASEEQYR
	TS7								45.16	GQPGKASEEQYR
	TS7	contig09223:455:1948:2	contig09223:455:1948:2|similar to Smoothened homolog (Q99835)|Evalue: 2e-52	29	57973	1	1.4	8.02	28.54	SSTLETR
	TS8	contig25127:343:2520:1	contig25127:343:2520:1|seems to belong to extended synaptotagmin family|Best-hit: Extended synaptotagmin-2 (A0FGR8)|Evalue: 5e-102	1095	81938	25	37.8	5.46	26.67	KISVPR
	TS8	contig08235:860:1596:2	contig08235:860:1596:2|No Annotation	812	27856	29	53.5	5.65	35.22	FGASSDEESDSFR
	TS8								61.96	FGASSDEESDSFR
	TS8	contig05746:82:1686:1	contig05746:82:1686:1|No Annotation	430	56808	10	23.6	4.35	25.99	RIEYPSDSSPIDSR
	TS8	contig16592:1:1150:2	contig16592:1:1150:2|similar to Probable splicing factor ECU05_1440 (Q8SRU2)|Evalue: 5e-04	240	42897	6	15.7	5.91	36.43	GVNSPTLSSQPLK
	TS8	contig06207:1:1701:1	contig06207:1:1701:1|similar to Probable glutamyl-tRNA(Gln) amidotransferase subunit B, mitochondrial (Q99JT1)|Evalue: 4e-129	34	63995	1	2.1	8.32	34.02	TTTKTPTDTQDK
	TS9	contig08235:860:1596:2	contig08235:860:1596:2|No Annotation	801	27856	19	53.5	5.65	32.05	FGASSDEESDSFR
	TS9	contig02295:455:757:2	contig02295:455:757:2|No Annotation	243	11684	19	48.5	6.82	32.46	GQPGKASEEQYR
	TS10	contig08235:860:1596:2	contig08235:860:1596:2|No Annotation	828	27856	30	53.5	5.65	61.65	FGASSDEESDSFR
	TS10								37.16	FGASSDEESDSFR
	TS11	contig08235:860:1596:2	contig08235:860:1596:2|No Annotation	865	27856	41	62	5.65	60.99	FGASSDEESDSFR
	TS11								43.95	FGASSDEESDSFR
	TS11	contig09307:77:854:2	contig09307:77:854:2|No Annotation	515	28770	16	38.6	6	29.04	KVQPSASSPR
	TS11	contig02753:473:937:2	contig02753:473:937:2|No Annotation	29	17394	1	4.5	9.07	29.08	KMTDDER
	TS12	contig08235:860:1596:2	contig08235:860:1596:2|No Annotation	819	27856	33	59.2	5.65	37.25	FGASSDEESDSFR
	TS12	contig16973:1:1246:2	contig16973:1:1246:2|similar to Proliferation-associated protein 2G4 (P50580)|Evalue: 4e-96	629	45899	19	29	7.96	52.95	LTTDEKDQHASDEEQENQETVR
	TS12								53	LTTDEKDQHASDEEQENQETVR
	TS13	contig03263:1:1127:3	contig03263:1:1127:3|similar to Gelsolin (Q07171)|Evalue: 3e-52	1032	42916	34	50.8	7.72	46.24	RQLSADAAFEK
	TS13	contig08235:860:1596:2	contig08235:860:1596:2|No Annotation	985	27856	72	62	5.65	35.71	FGASSDEESDSFR
	TS13	contig01971:138:399:3	contig01971:138:399:3|No Annotation	321	9637	17	57.5	5.8	66.05	ETSVIDTEFGSVGGR
	TS13	contig17318:1:1144:2	contig17318:1:1144:2|similar to Cathepsin L (Q26636)|Evalue: 1e-33	201	41408	5	15	8.81	37.06	KLEPVLPEAVTSDEE
	TS13	contig24158:1:183:1	contig24158:1:183:1|No Annotation	177	6648	8	46.7	10.4	30.79	TAGSQSPPQSPK
	TS13								68.24	KTAGSQSPPQSPK
	TS14	contig24158:1:183:1	contig24158:1:183:1|No Annotation	159	6648	7	46.7	10.4	27.18	TAGSQSPPQSPK
	TS14								65.06	KTAGSQSPPQSPK
	TS14	contig09307:77:854:2	contig09307:77:854:2|No Annotation	124	28770	3	13.5	6	31.86	KVQPSASSPR
	TS15	contig27315:1:1930:2	contig27315:1:1930:2|similar to Ran GTPase-activating protein (Q9VIW3)|Evalue: 3e-42	28	72950	1	1.4	4.99	27.67	IGSSLLSGK
	TS16	contig08235:860:1596:2	contig08235:860:1596:2|No Annotation	613	27856	13	49.4	5.65	45.66	FGASSDEESDSFR
	TS17	contig08235:860:1596:2	contig08235:860:1596:2|No Annotation	424	27856	9	28.6	5.65	55.1	FGASSDEESDSFR
	TS17	contig22343:1:591:1	contig22343:1:591:1|similar to Tumor protein D52 (P55327)|Evalue: 1e-08	417	21345	13	43.4	5.5	25.32	KTETIIK
	TS18	contig08235:860:1596:2	contig08235:860:1596:2|No Annotation	429	27856	10	40.4	5.65	44.61	FGASSDEESDSFR
	TS18								29.46	FGASSDEESDSFR
	TS18	contig26550:1:288:1	contig26550:1:288:1|similar to B-cell receptor-associated protein 31 (Q5R8H3)|Evalue: 4e-06	287	10665	12	42.1	8.18	57.92	SVLTGDTSETVRDSPNPALQQQLQK
	TS18	contig25413:56:228:2	contig25413:56:228:2|similar to Rho GDP-dissociation inhibitor 1 (Q5XI73)|Evalue: 7e-05	131	6198	4	63.2	4.65	50.99	SSGDAKEEVNSDEETNYK
	TS18	contig03689:1:165:1	contig03689:1:165:1|No Annotation	29	6476	1	14.8	9.9	28.71	TKLNNSIQ
	Active state
	AS4	contig08235:860:1596:2	contig08235:860:1596:2|No Annotation	684	27856	14	51.8	5.65	35.6	FGASSDEESDSFR
	AS4	contig19615:1:999:3	contig19615:1:999:3|similar to Myosin light chain kinase, smooth muscle (Q6PDN3)|Evalue: 3e-29	237	36187	5	17.8	4.81	29.93	RASISAPSTR
	AS5	contig19615:1:999:3	contig19615:1:999:3|similar to Myosin light chain kinase, smooth muscle (Q6PDN3)|Evalue: 3e-29	311	36187	5	21.7	4.81	47.86	RASISAPSTR
	AS5	contig01898:1:1650:1	contig01898:1:1650:1|similar to T-complex protein 1 subunit epsilon (P48643)|Evalue: 0.0	31	60726	1	1.5	5.74	30.62	LGSASVVR
	AS6	contig08235:860:1596:2	contig08235:860:1596:2|No Annotation	834	27856	28	54.7	5.65	54.87	FGASSDEESDSFR
	AS6	contig02295:455:757:2	contig02295:455:757:2|No Annotation	280	11684	16	57.4	6.82	49.73	GQPGKASEEQYR
	AS6	contig23035:1356:1868:2	contig23035:1356:1868:2|similar to RhoA activator C11orf59 homolog (Q6P791)|Evalue: 9e-15	33	18982	1	3.5	5.42	32.74	SSSVLK
	AS7	contig24758:1:1673:3	contig24758:1:1673:3|similar to Paramyosin (Q86RN8)|Evalue: 2e-126	2742	64906	112	62.4	5.47	28.81	SSITTGR
	AS7	contig08235:860:1596:2	contig08235:860:1596:2|No Annotation	754	27856	25	54.7	5.65	30.31	FGASSDEESDSFR
	AS7								43.91	FGASSDEESDSFR
	AS7	contig02295:455:757:2	contig02295:455:757:2|No Annotation	354	11684	33	57.4	6.82	66.56	GQPGKASEEQYR
	AS7	contig05682:1:2558:3	contig05682:1:2558:3|similar to Tumor suppressor p53-binding protein 1 (Q12888)|Evalue: 6e-22	235	94591	5	7.6	6.02	48.31	AEDKEEASDAEEEEEKPK
	AS7	contig19615:1:999:3	contig19615:1:999:3|similar to Myosin light chain kinase, smooth muscle (Q6PDN3)|Evalue: 3e-29	175	36187	4	15.1	4.81	27.36	RASISAPSTR
	AS7	contig23035:1356:1868:2	contig23035:1356:1868:2|similar to RhoA activator C11orf59 homolog (Q6P791)|Evalue: 9e-15	36	18982	1	3.5	5.42	35.64	SSSVLK
	AS8	contig08235:860:1596:2	contig08235:860:1596:2|No Annotation	782	27856	26	50.6	5.65	58.09	FGASSDEESDSFR
	AS8								36.19	FGASSDEESDSFR
	AS8	contig02295:455:757:2	contig02295:455:757:2|No Annotation	241	11684	19	48.5	6.82	55.16	GQPGKASEEQYR
	AS8	contig19615:1:999:3	contig19615:1:999:3|similar to Myosin light chain kinase, smooth muscle (Q6PDN3)|Evalue: 3e-29	228	36187	7	15.1	4.81	32.62	RASISAPSTR
	AS8	contig06207:1:1701:1	contig06207:1:1701:1|similar to Probable glutamyl-tRNA(Gln) amidotransferase subunit B, mitochondrial (Q99JT1)|Evalue: 4e-129	33	63995	1	2.1	8.32	33.25	TTTKTPTDTQDK
	AS8	contig00991:1:111:1	contig00991:1:111:1|No Annotation	30	4003	1	27.8	9.5	29.62	NCICSFVTLK
	AS9	contig08235:860:1596:2	contig08235:860:1596:2|No Annotation	694	27856	24	52.7	5.65	44	FGASSDEESDSFR
	AS9	contig03009:1:389:3	contig03009:1:389:3|similar to Pyridoxal phosphate phosphatase (P60487)|Evalue: 9e-19	32	14028	1	6.2	5.43	31.9	EVGLERSR
	AS10	contig08235:860:1596:2	contig08235:860:1596:2|No Annotation	803	27856	27	54.3	5.65	41.29	FGASSDEESDSFR
	AS10								57.82	FGASSDEESDSFR
	AS11	contig08235:860:1596:2	contig08235:860:1596:2|No Annotation	871	27856	28	61.6	5.65	32.31	FGASSDEESDSFR
	AS11								51.03	FGASSDEESDSFR
	AS11	contig03161:1:931:2	contig03161:1:931:2|similar to 2-oxoisovalerate dehydrogenase subunit alpha, mitochondrial (A5A6H9)|Evalue: 5e-120	491	34981	10	43.4	8.41	66.82	VGHHSTSDDSSAYR
	AS11	contig02753:473:937:2	contig02753:473:937:2|No Annotation	39	17394	1	4.5	9.07	38.56	KMTDDER
	AS12	contig08235:860:1596:2	contig08235:860:1596:2|No Annotation	747	27856	28	55.9	5.65	30.52	FGASSDEESDSFR
	AS12	contig16973:1:1246:2	contig16973:1:1246:2|similar to Proliferation-associated protein 2G4 (P50580)|Evalue: 4e-96	619	45899	16	29.2	7.96	55.06	LTTDEKDQHASDEEQENQETVR
	AS12	contig27193:192:1466:3	contig27193:192:1466:3|similar to Cytoplasmic dynein 1 light intermediate chain 2 (Q6PDL0)|Evalue: 6e-83	304	48003	7	22.6	5.38	26.89	RPSPSQTSPR
	AS12	contig26126:94:1870:1	contig26126:94:1870:1|similar to Monocarboxylate transporter 12 (Q6ZSM3)|Evalue: 1e-30	170	64958	4	7.1	8.52	61.59	HFVASQTDISK
	AS12	contig13089:164:1052:2	contig13089:164:1052:2|similar to General negative regulator of transcription subunit 4 (P34909)|Evalue: 8e-51	32	34269	1	2.4	7.91	31.85	TKIVVNK
	AS13	contig03263:1:1127:3	contig03263:1:1127:3|similar to Gelsolin (Q07171)|Evalue: 3e-52	924	42916	30	42.2	7.72	39.87	RQLSADAAFEK
	AS13	contig19694:48:1100:3	contig19694:48:1100:3|similar to Sulfotransferase 1C2 (Q9D939)|Evalue: 2e-44	656	41321	17	51.1	6.39	31.66	KVSIWQVDYDHPEFLHNYK
	AS13	contig24158:1:183:1	contig24158:1:183:1|No Annotation	132	6648	3	46.7	10.4	63.54	KTAGSQSPPQSPK
	AS14	contig24199:214:1227:1	contig24199:214:1227:1|similar to Uncharacterized protein ZK1073.1 (O02485)|Evalue: 2e-70	1237	38027	38	66.8	6.33	27.5	SISQSSNEGIRPGR
	AS16	contig08235:860:1596:2	contig08235:860:1596:2|No Annotation	626	27856	18	46.1	5.65	37.01	FGASSDEESDSFR
	AS17	contig08235:860:1596:2	contig08235:860:1596:2|No Annotation	548	27856	10	42.9	5.65	51.8	FGASSDEESDSFR
	AS17	contig02925:45:590:3	contig02925:45:590:3|No Annotation	27	20945	1	3.3	8.8	27.37	RSVLTK
	AS18	contig08235:860:1596:2	contig08235:860:1596:2|No Annotation	563	27856	11	44.5	5.65	46.29	FGASSDEESDSFR
	AS18	contig26550:1:288:1	contig26550:1:288:1|similar to B-cell receptor-associated protein 31 (Q5R8H3)|Evalue: 4e-06	281	10665	11	40	8.18	53.21	SVLTGDTSETVRDSPNPALQQQLQK
	AS18								54.79	SVLTGDTSETVRDSPNPALQQQLQK
	AS19	contig08542:152:670:2	contig08542:152:670:2|similar to Probable myosin regulatory light chain (Q09510)|Evalue: 4e-50	730	18848	30	76.2	4.96	57.68	ATSNVFAMFEQSQIQEFK
